# Supplementary material for: Establishing comprehensive quaternary structural proteomes from genome sequence
Source: Research Square preprint supplement (doi:10.21203/rs.3.rs-2923626/v1), 2023-05-19

## Manual Orientation of Membrane Proteins

The following proteins were identified as potential membrane proteins by information provided in EcoCyc, iML1515, or Gene Ontology terms for the genes mapped to their subunits. Membrane planes that passed QCQA were identified from at least 1 of 3 methods (OPM/UniProt/TMHMM). These proteins could not be oriented (e.g. there was no topological information provided from UniProt). Manual inspection of the membrane calculations shows these to be membrane proteins. Literature search of the genes mapped to these structures places them in the **Outer Membrane**.

### Outer Membrane Structures

| O – Extracellular (OM)                                                              | Category : Outer Membrane                                                           |                                                                                      |                                                                                       |
|-------------------------------------------------------------------------------------|-------------------------------------------------------------------------------------|--------------------------------------------------------------------------------------|---------------------------------------------------------------------------------------|
| N – Periplasmic (OM)                                                                |                                                                                     |                                                                                      |                                                                                       |
| B-barrel                                                                            |                                                                                     |                                                                                      |                                                                                       |
| 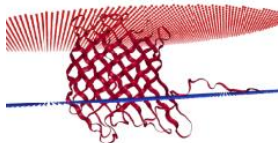   |    |    |    |
| AF-P76206                                                                           | 7VTZ                                                                                | AF-P0A927                                                                            | 2MHL                                                                                  |
|  |  |  |  |
| P31827_29_790_6OFR                                                                  | P17315_31_663_2HDI                                                                  | P05825_33_746_1FEP                                                                   | NMPC-CPLX_AlphaMulti                                                                  |
|  |  |  |  |
| AF-P37650                                                                           | AF-P31600                                                                           | AF-P69434                                                                            | P77211_18_454_3PIK                                                                    |

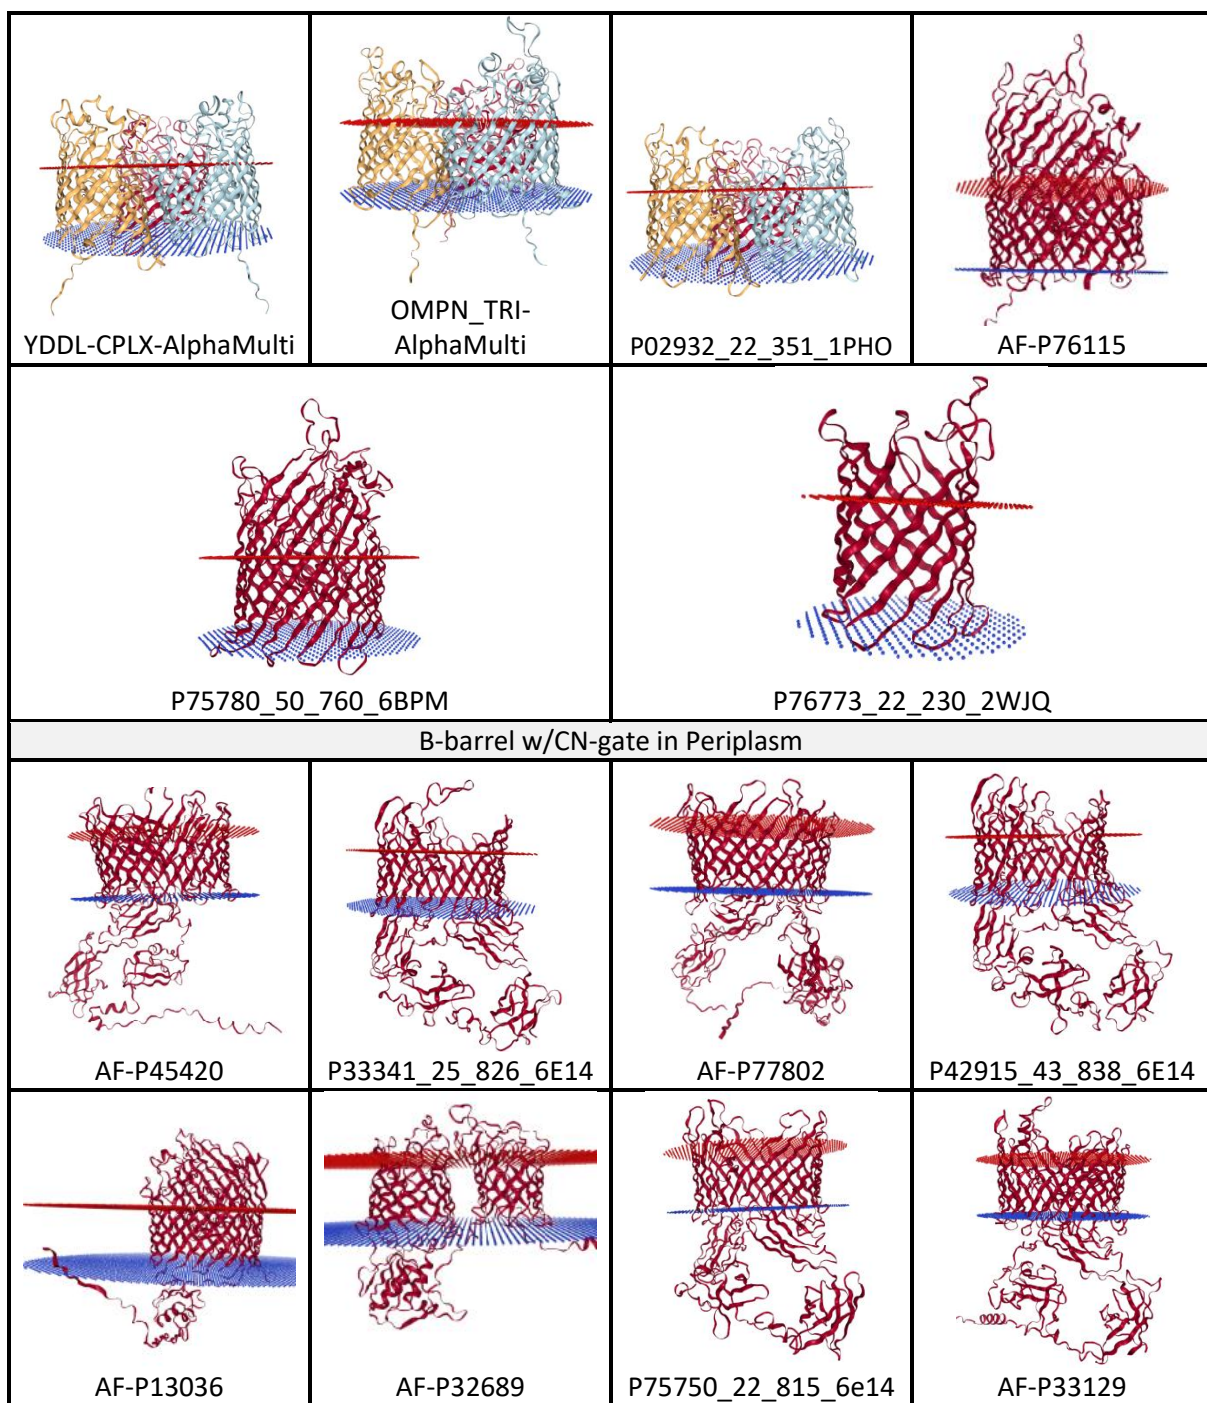

|                                                                                     |                                                                                     |                                                                                      |                                                                                       |
|-------------------------------------------------------------------------------------|-------------------------------------------------------------------------------------|--------------------------------------------------------------------------------------|---------------------------------------------------------------------------------------|
| 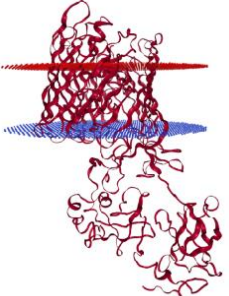   |    |    |    |
| P76655_21_820_6cd2                                                                  | P77468_37_862_6e14                                                                  | P75857_37_866_6e14                                                                   | AF-P75882                                                                             |
| OM - Other                                                                          |                                                                                     |                                                                                      |                                                                                       |
|    |    |    |                                                                                       |
| P0A932_22_376_2J58                                                                  | P0A930_22_378_2J58                                                                  | 7ojg                                                                                 |                                                                                       |
| O – OM 1                                                                            | Category : Outer Membrane                                                           |                                                                                      |                                                                                       |
| N – OM 2                                                                            |                                                                                     |                                                                                      |                                                                                       |
| OM - No Orientation                                                                 |                                                                                     |                                                                                      |                                                                                       |
|  |                                                                                     |                                                                                      |                                                                                       |
| CPLX0-1581_AlphaMulti                                                               |                                                                                     |                                                                                      |                                                                                       |
| N – Extracellular (OM)                                                              | Category: Outer Membrane                                                            |                                                                                      |                                                                                       |
| O – Periplasmic (OM)                                                                |                                                                                     |                                                                                      |                                                                                       |
| OM – B-barrel                                                                       |                                                                                     |                                                                                      |                                                                                       |
|  |  |  |  |
| YHJY_ECOLI                                                                          | CPLX0-7628_AlphaMulti                                                               | AF-P26218                                                                            | AF-Q47706                                                                             |



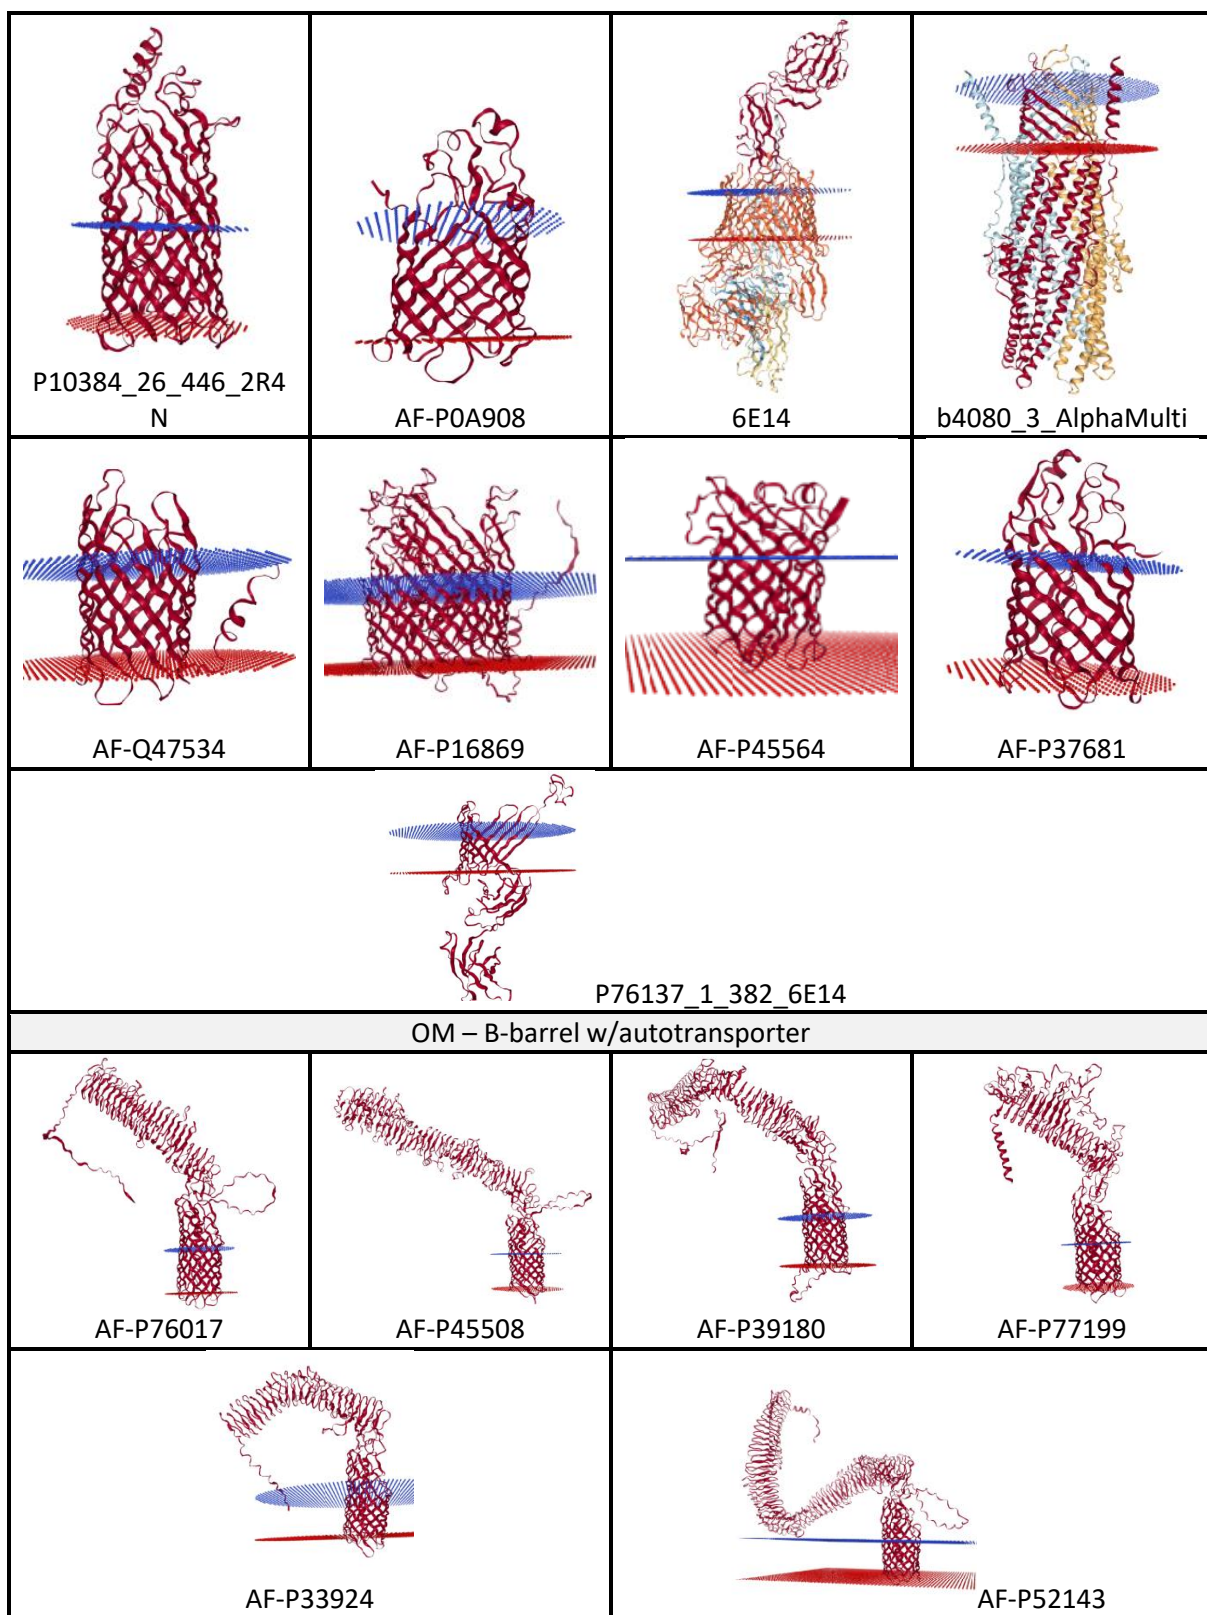

Supplement: Supplementary file 6 [file manual_orient_outerMembrane.pdf › manual_orient_outerMembrane.pdf]
