# Supplementary material for: Establishing comprehensive quaternary structural proteomes from genome sequence
Source: Research Square preprint supplement (doi:10.21203/rs.3.rs-2923626/v1), 2023-05-19

## Manual Orientation of Membrane Proteins

The following proteins were identified as potential membrane proteins by information provided in EcoCyc, iML1515, or Gene Ontology terms for the genes mapped to their subunits. Membrane planes that passed QCQA were identified from at least 1 of 3 methods (OPM/UniProt/TMHMM). These proteins could not be oriented (e.g. there was no topological information provided from UniProt). Manual inspection of the membrane calculations shows these to be inner membrane proteins. Literature search of the genes mapped to these structures places them in the **Inner Membrane**. These proteins are NOT able to be oriented.

### Inner Membrane Structures

| O – IM Unknown 1                                                                    | Category: Inner Membrane (No Orientation)                                           |                                                                                      |                                                                                       |
|-------------------------------------------------------------------------------------|-------------------------------------------------------------------------------------|--------------------------------------------------------------------------------------|---------------------------------------------------------------------------------------|
| N – IM Unknown 2                                                                    |                                                                                     |                                                                                      |                                                                                       |
| Transporters                                                                        |                                                                                     |                                                                                      |                                                                                       |
| 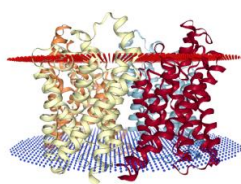   |    |    |    |
| 1FX8                                                                                | AF-P46133                                                                           | AF-P0A6M2                                                                            | AF-P0A6M2                                                                             |
|  |  |  |  |
| AF-P0AFA7                                                                           | AF-P76249                                                                           | AF-Q47689                                                                            | AF-P45468                                                                             |
|  |  |  |  |
| AF-P45546                                                                           | AF-P39381                                                                           | AF-P28303                                                                            | AF-P43676                                                                             |
|  |  |  |  |
| AF-P77437                                                                           | AF-P77610                                                                           | SETB_ECOLI                                                                           | AF-P75920                                                                             |

|                                                                                                                  |                                                                                                      |                                                                                                             |                                                                                                        |
|------------------------------------------------------------------------------------------------------------------|------------------------------------------------------------------------------------------------------|-------------------------------------------------------------------------------------------------------------|--------------------------------------------------------------------------------------------------------|
| 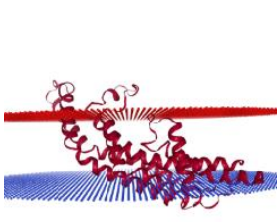 <p>AF-P33135</p>               |  <p>AF-P45539</p>   |  <p>P37002_2_125_5KBN</p> |  <p>YGHE_ECOLI</p>  |
|  <p>P17583_16_373_6GV<br/>1</p> |  <p>AF-P76219</p>   |  <p>AF-P0ACY6</p>         |  <p>AF-P0AF43</p>   |
|  <p>AF-P45804</p>              |  <p>AF-P30143</p>  |  <p>AF-P33231</p>        |  <p>AF-P32136</p>  |
|  <p>AF-P75693</p>             |  <p>AF-P77180</p> |  <p>AF-P55140</p>       |  <p>AF-P0ADI9</p> |
|  <p>AF-P0AF34</p>             |  <p>AF-P39357</p> |  <p>AF-P39365</p>       |  <p>AF-P45522</p> |



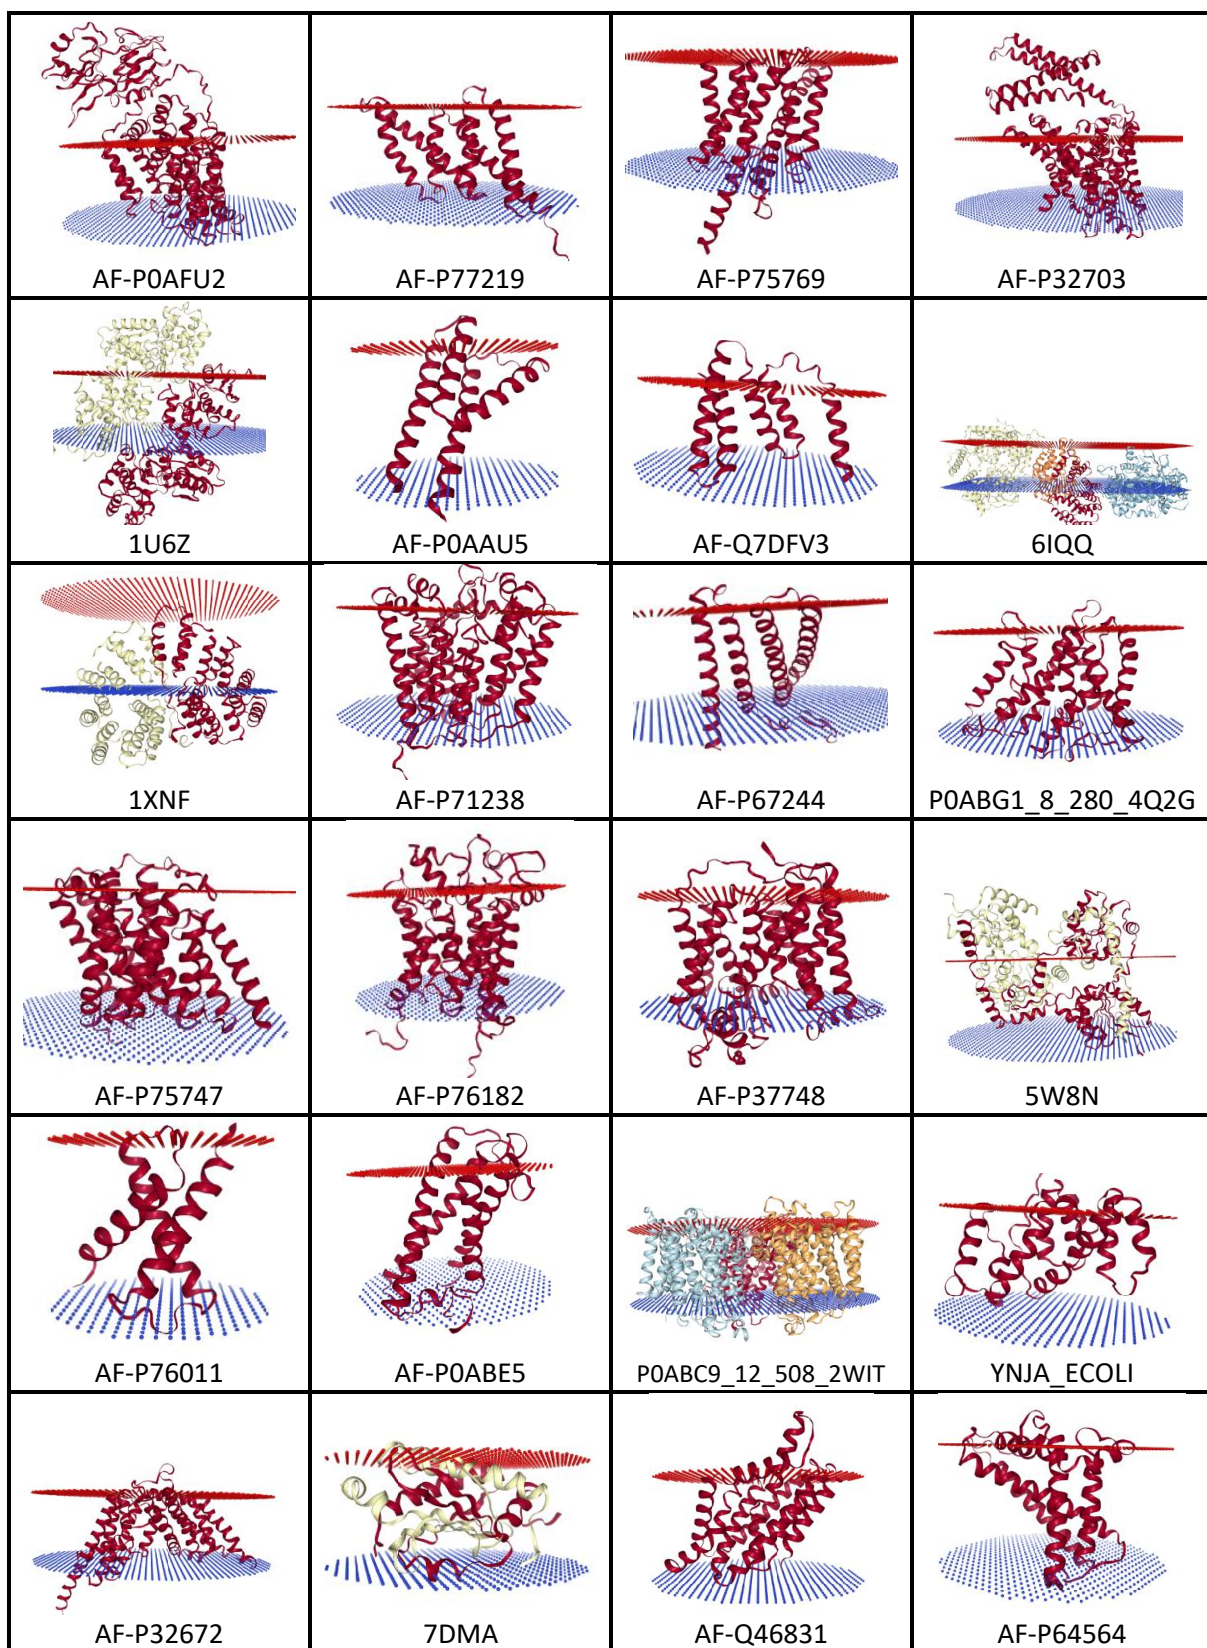

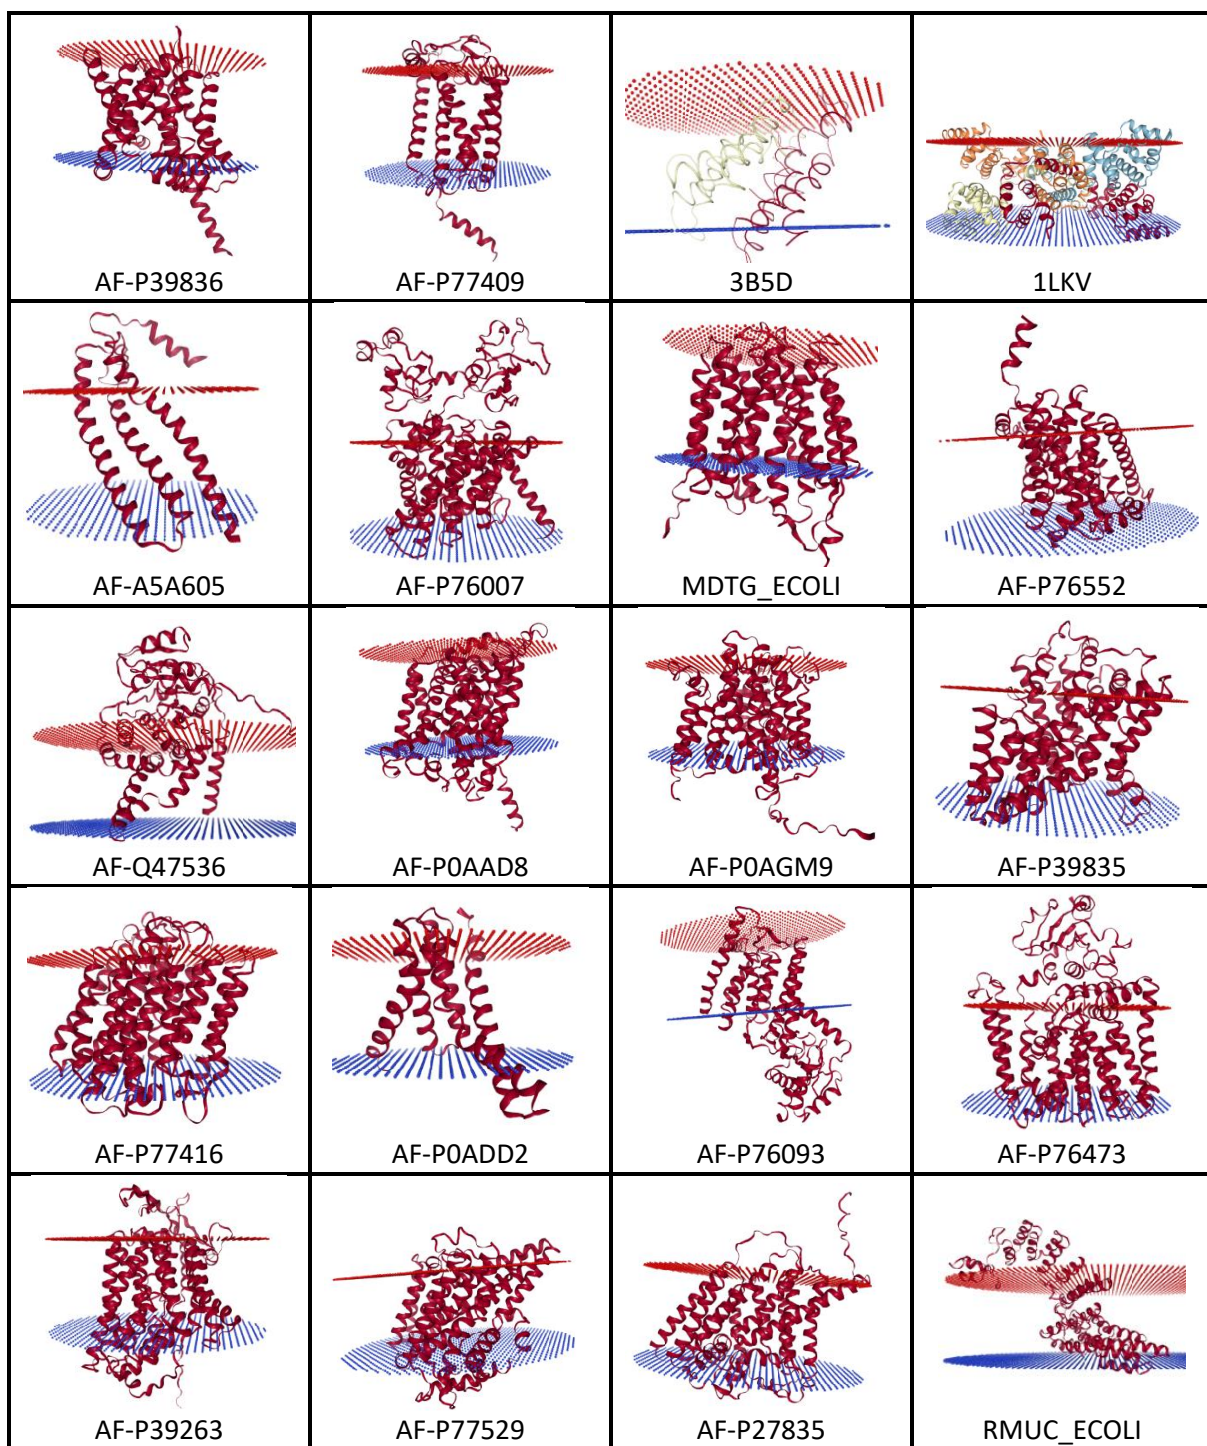



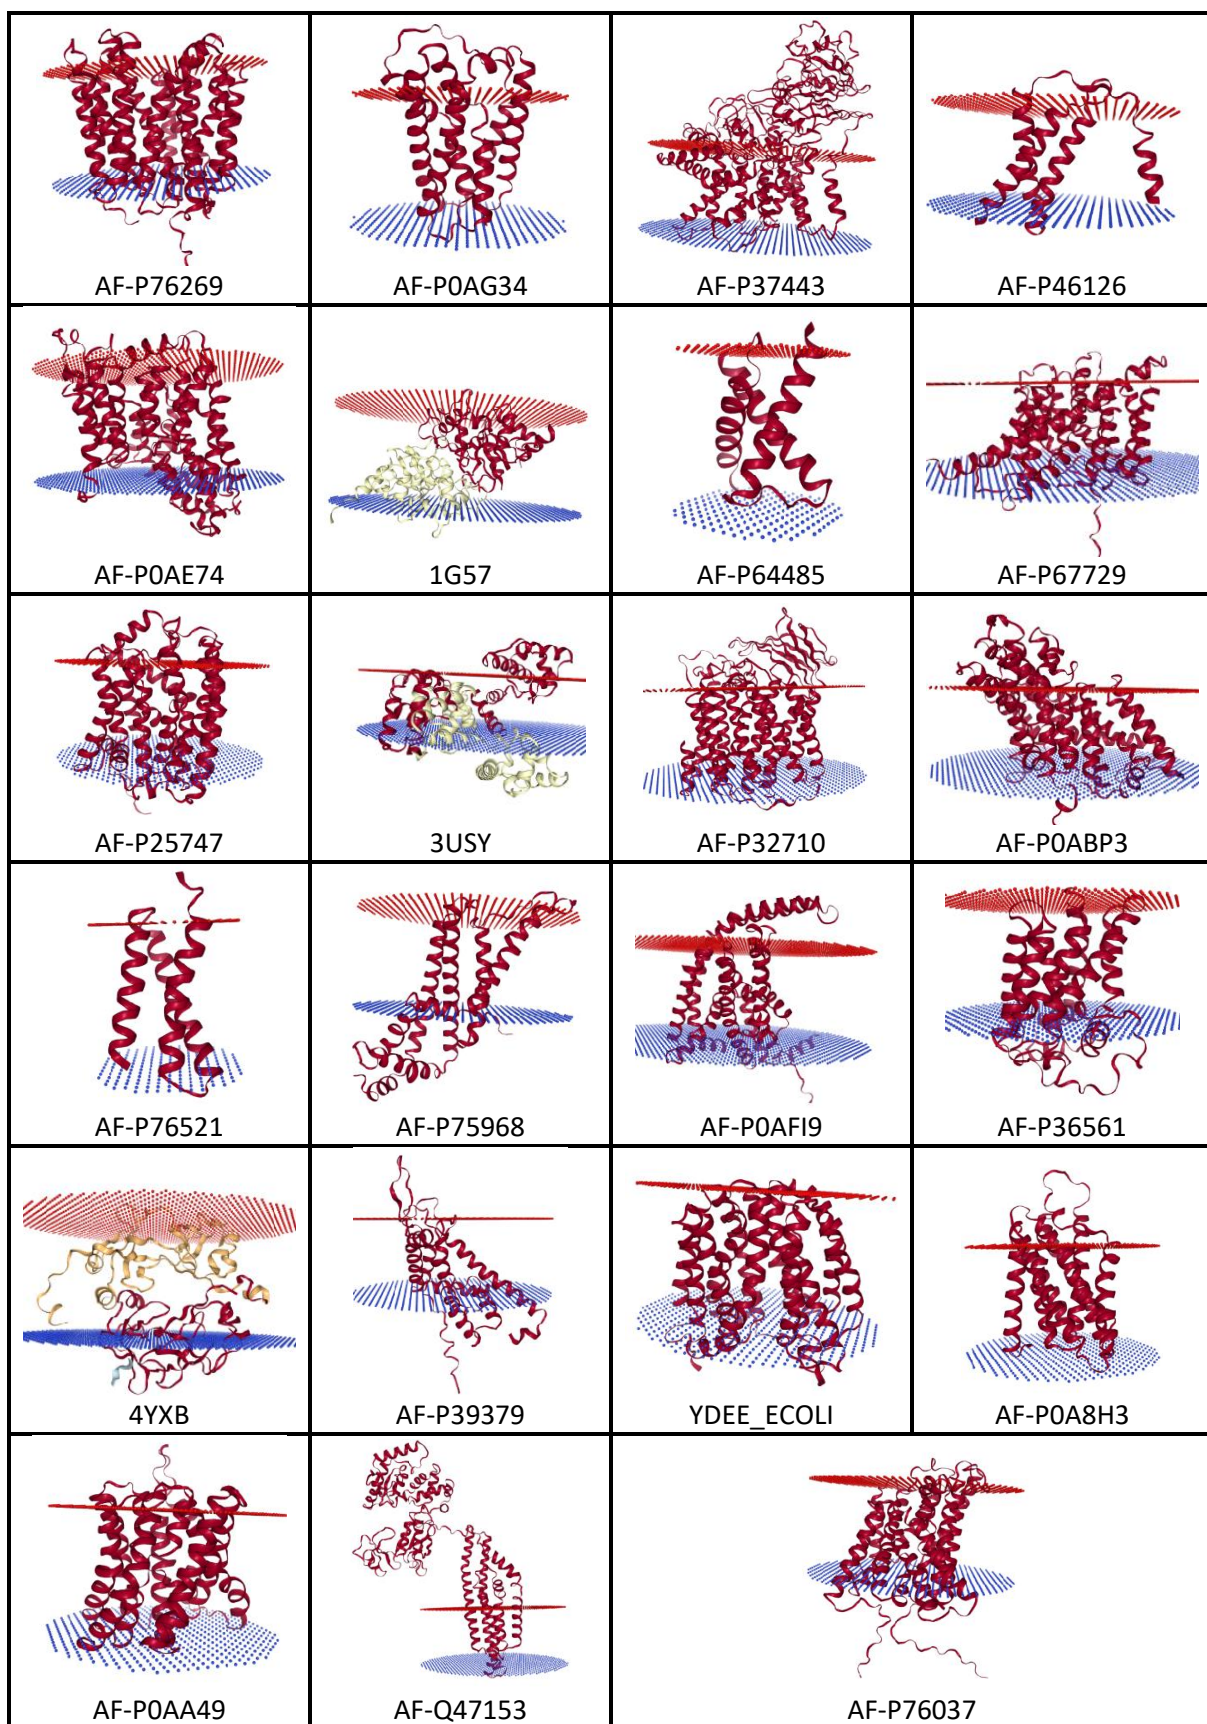

| TM – Segments                                                                       |                                                                                     |                                                                                      |                                                                                       |
|-------------------------------------------------------------------------------------|-------------------------------------------------------------------------------------|--------------------------------------------------------------------------------------|---------------------------------------------------------------------------------------|
| 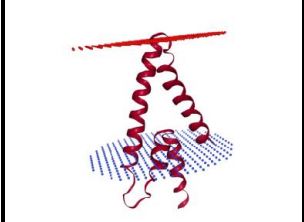   |    |    |    |
| AF-P37614                                                                           | AF-P64471                                                                           | AF-P0CB62                                                                            | AF-G3MTW7                                                                             |
|    |    |    |    |
| AF-P39355                                                                           | AF-P0DPO8                                                                           | AF-P0AC07                                                                            | AF-Q2EES6                                                                             |
|   |   |   |   |
| AF-C1P616                                                                           | AF-P46879                                                                           | AF-P0DPD0                                                                            | AF-P64536                                                                             |
|  |  |  |  |
| AF-P64499                                                                           | AF-O32528                                                                           | AF-P0DPN0                                                                            | AF-P27842                                                                             |
|  |  |  |  |
| AF-P46119                                                                           | AF-P03825                                                                           | AF-P52134                                                                            | AF-C1P620                                                                             |
|  |  |  |  |
| AF-P32108                                                                           | AF-P0ADJ5                                                                           | AF-P33236                                                                            | AF-P32711                                                                             |

|                                                                                     |                                                                                     |                                                                                      |                                                                                       |
|-------------------------------------------------------------------------------------|-------------------------------------------------------------------------------------|--------------------------------------------------------------------------------------|---------------------------------------------------------------------------------------|
| 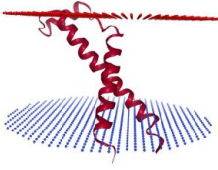   |    |    |    |
| AF-P77506                                                                           | P0DPD1_1_35_5l bj                                                                   | AF-A5A630                                                                            | AF-P64622                                                                             |
|    |    |    |    |
| AF-Q2EES1                                                                           | AF-P55914                                                                           | AF-P75979                                                                            | AF-P0DPO5                                                                             |
|    |    |    |    |
| AF-P0AAQ0                                                                           | AF-P0AF73                                                                           | AF-P64445                                                                            | AF-P65298                                                                             |
|   |   |   |   |
| AF-P0DPN4                                                                           | AF-P77237                                                                           | AF-P69428                                                                            | AF-P0ADB4                                                                             |
|  |  |   |  |
| AF-P39385                                                                           | AF-C1P617                                                                           | AF-P0ACG6                                                                            | AF-P0A843                                                                             |
|  |  |   |  |
| AF-P0A8T5                                                                           | AF-C1P609                                                                           | AF-P77494                                                                            | AF-P45566                                                                             |
|  |  |  |  |
| AF-P0AAA5                                                                           | AF-P0AFV8                                                                           | AF-P0DPO4                                                                            | AF-P0AB49                                                                             |



|                                                                                     |                                                                                     |                                                                                      |                                                                                       |
|-------------------------------------------------------------------------------------|-------------------------------------------------------------------------------------|--------------------------------------------------------------------------------------|---------------------------------------------------------------------------------------|
| 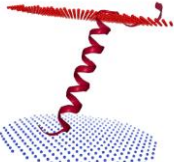   |    |    |    |
| AF-C1P602                                                                           | AF-P0A9R2                                                                           | AF-P0DPO1                                                                            | AF-P0ADA7                                                                             |
|    |    |    |    |
| AF-P0DPN9                                                                           | AF-A8DYQ1                                                                           | AF-A5A624                                                                            | AF-C1P615                                                                             |
|    |    |    |    |
| AF-P32700                                                                           | AF-P37305                                                                           | AF-P64646                                                                            | AF-C1P607                                                                             |
|   |   |   |   |
| AF-C1P610                                                                           | AF-P0AFM9                                                                           | AF-A5A615                                                                            | AF-C1P612                                                                             |
|  |  |  |  |
| AF-P0DPO9                                                                           | AF-P58042                                                                           | AF-P58041                                                                            | AF-P76692                                                                             |
|  |  |  |  |
| Q6BF87_1_35_5l bj                                                                   | AF-P76239                                                                           | AF-Q2M5U1                                                                            | AF-P75971                                                                             |



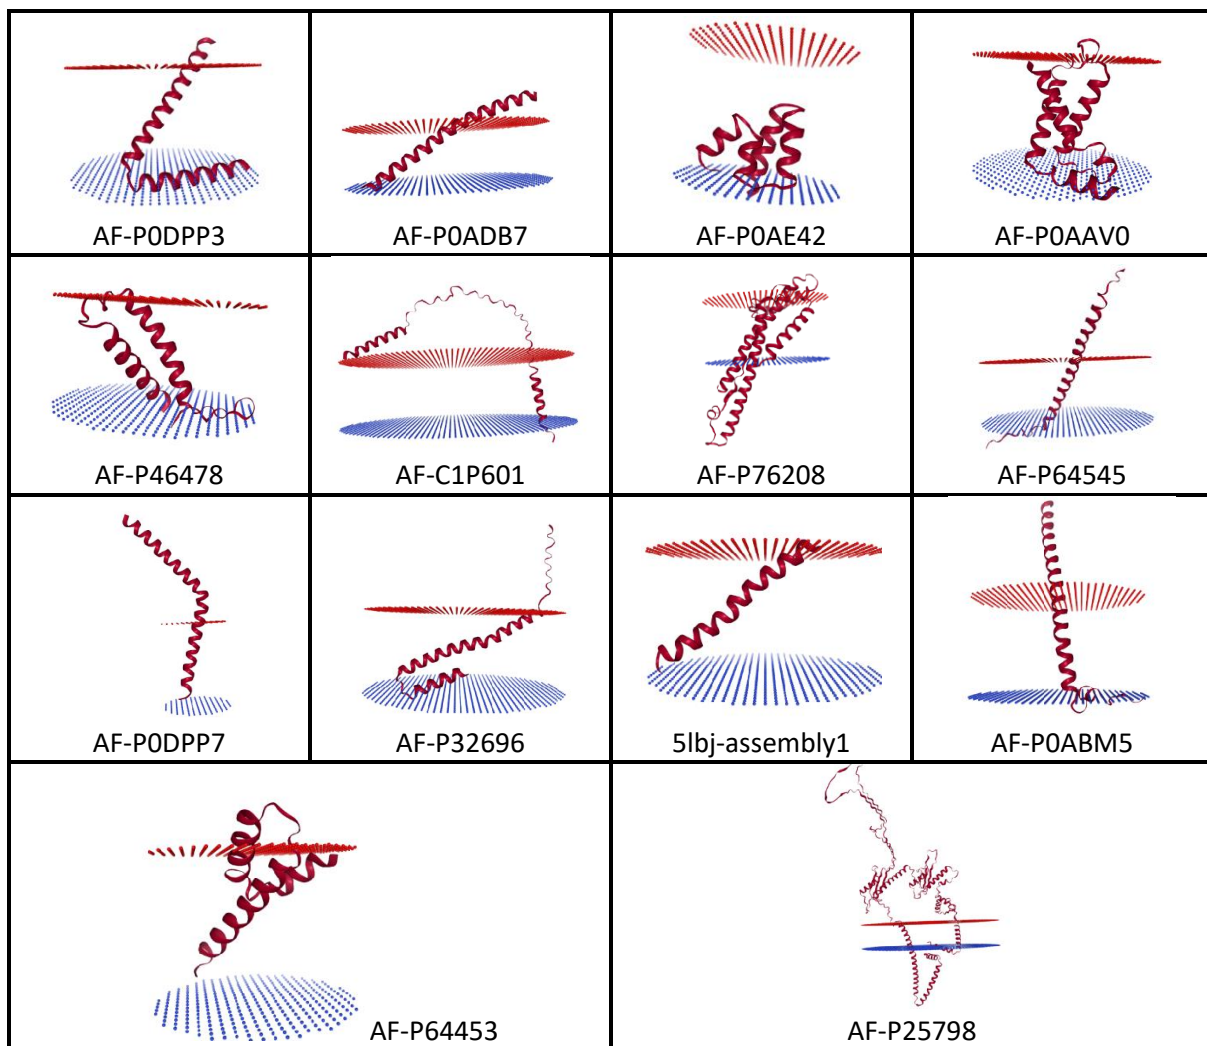

Supplement: Supplementary file 4 [file manual_orient_innerMembrane_unknownOrient.pdf › manual_orient_innerMembrane_unknownOrient.pdf]
