# Supplementary material for: Establishing comprehensive quaternary structural proteomes from genome sequence
Source: Research Square preprint supplement (doi:10.21203/rs.3.rs-2923626/v1), 2023-05-19

## Manual Orientation of Membrane Proteins

The following proteins were identified as potential membrane proteins by information provided in EcoCyc, iML1515, or Gene Ontology terms for the genes mapped to their subunits. Membrane planes that passed QCQA were identified from at least 1 of 3 methods (OPM/UniProt/TMHMM). These proteins could not be oriented (e.g. there was no topological information provided from UniProt). Manual inspection of the membrane calculations shows these to be inner membrane proteins. Literature search of the genes mapped to these structures places them in the **Inner Membrane**.

### Inner Membrane Structures

| O – Periplasmic (IM)                                                                | Category: Inner Membrane                                                            |                                                                                      |                                                                                       |
|-------------------------------------------------------------------------------------|-------------------------------------------------------------------------------------|--------------------------------------------------------------------------------------|---------------------------------------------------------------------------------------|
| N – Cytoplasmic (IM)                                                                |                                                                                     |                                                                                      |                                                                                       |
| ABC-Transporter                                                                     |                                                                                     |                                                                                      |                                                                                       |
| 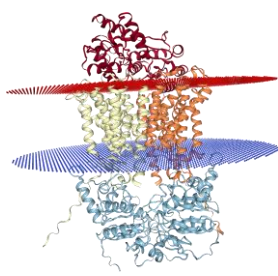   |    |    |    |
| ABC-60                                                                              | ABC-64                                                                              | ABC-61                                                                               | ABC-62                                                                                |
|  |  |  |  |
| ABC-23                                                                              | ABC-32                                                                              | ABC-11                                                                               | ABC-2                                                                                 |
|  |  |  |                                                                                       |
| P77265_3_572_5mkk                                                                   | ABC-6                                                                               | AF-P33941                                                                            |                                                                                       |
| Multi-drug efflux                                                                   |                                                                                     |                                                                                      |                                                                                       |

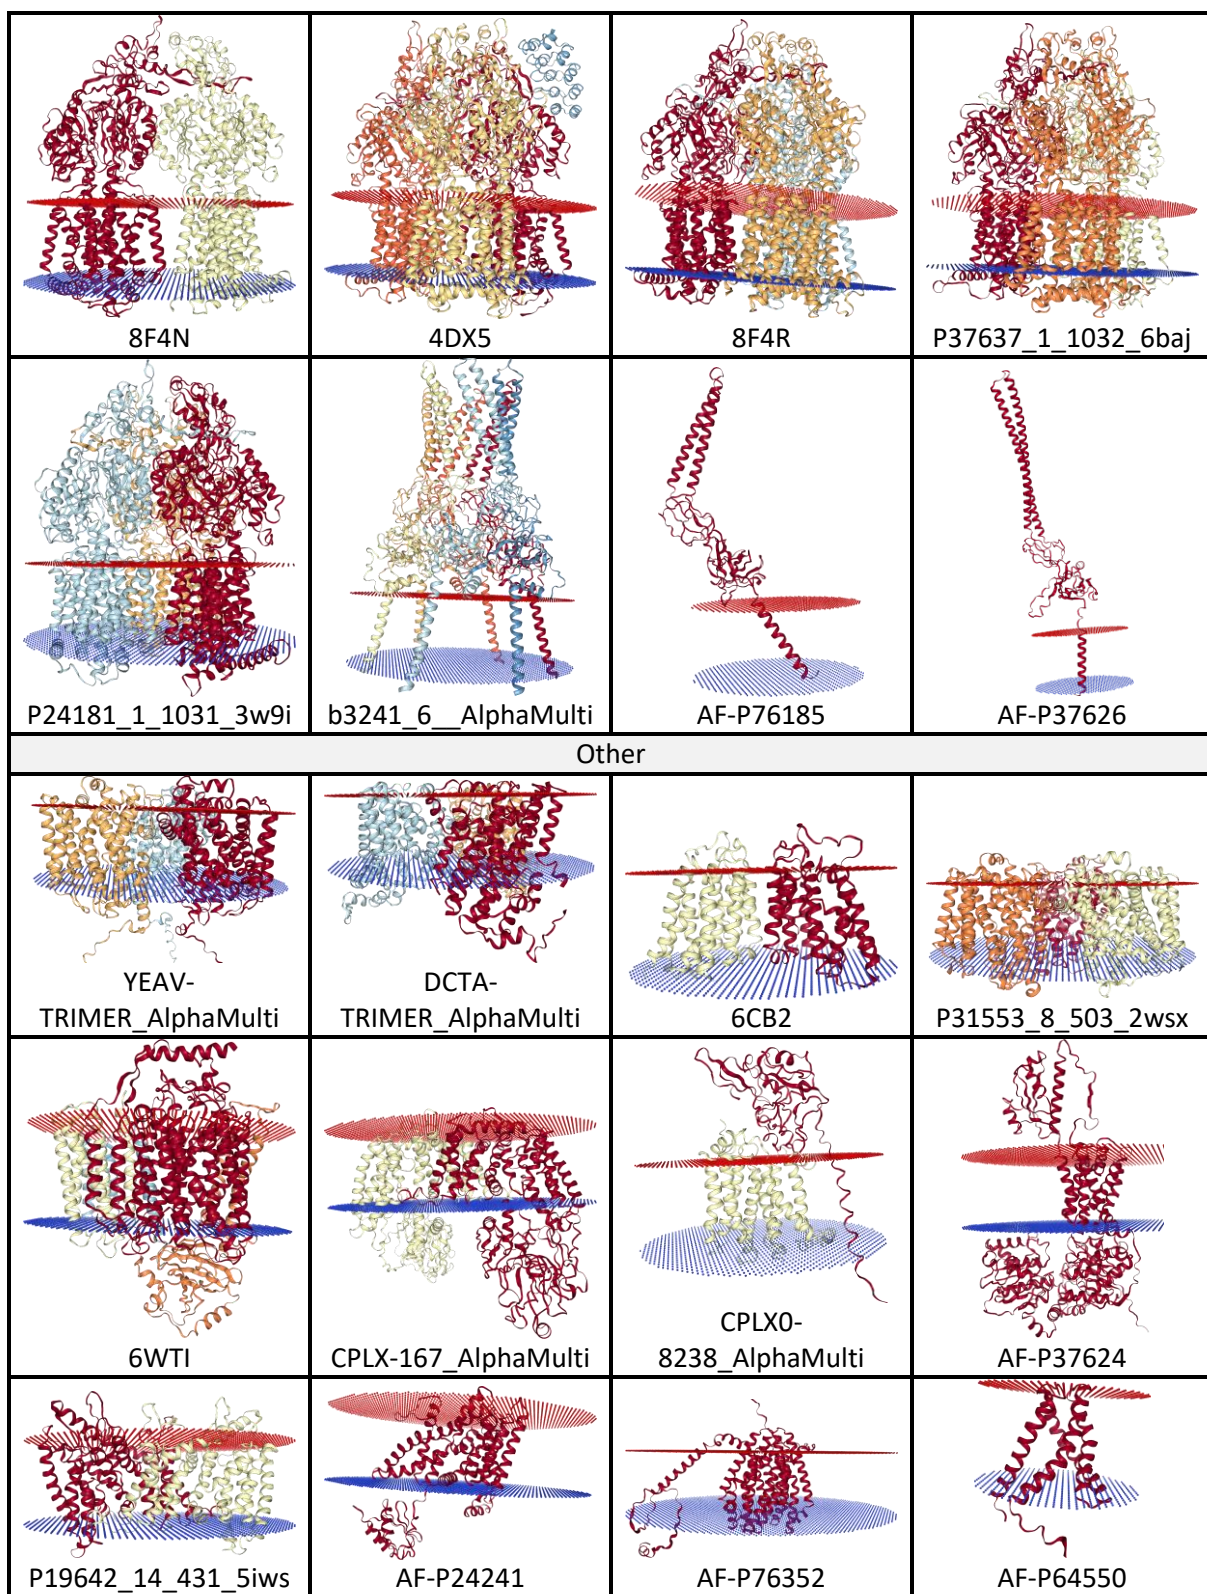

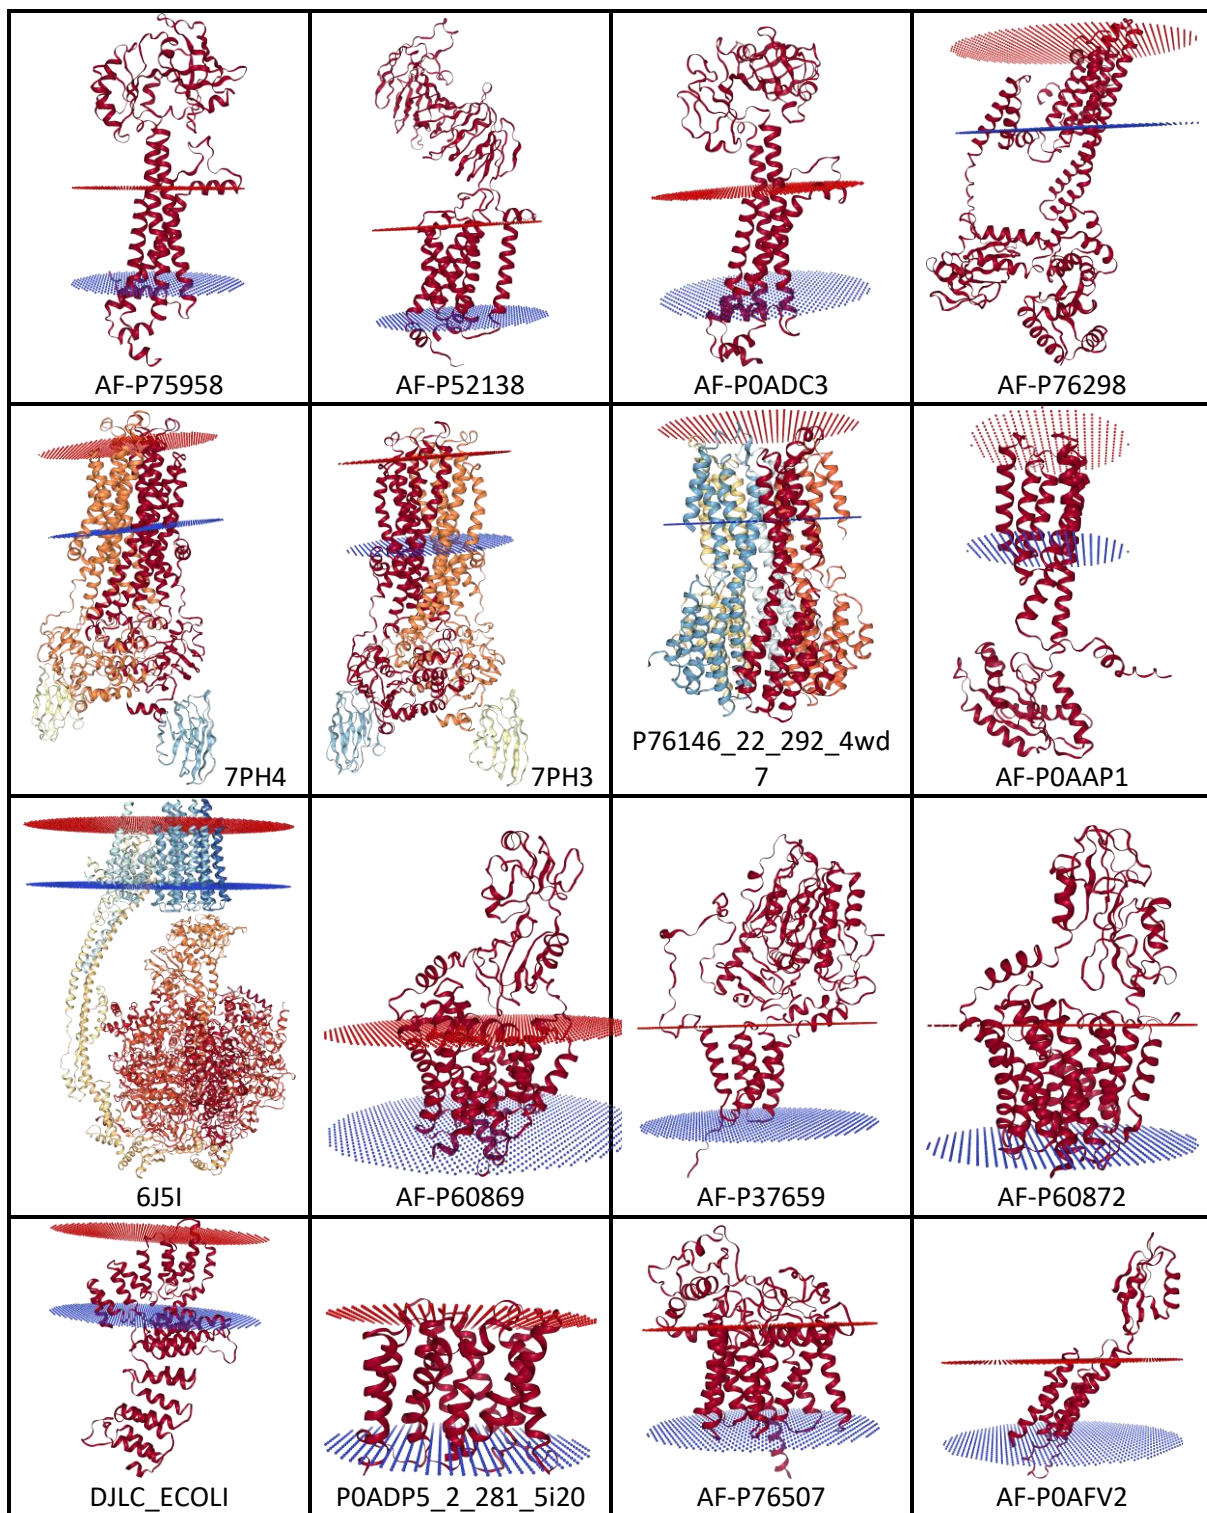



|                                                                                     |                                                                                     |                                                                                      |                                                                                       |
|-------------------------------------------------------------------------------------|-------------------------------------------------------------------------------------|--------------------------------------------------------------------------------------|---------------------------------------------------------------------------------------|
| 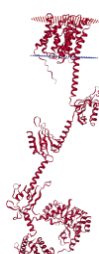   |    |    |    |
| AF-P38097                                                                           | AF-P23842                                                                           | AF-P0CB39                                                                            | AF-P45565                                                                             |
|    |    |    |                                                                                       |
| AF-P75910                                                                           | AF-P37665                                                                           | CPLX-159_AlphaMulti                                                                  |                                                                                       |
| N – Periplasmic (IM)                                                                | Category: Inner Membrane                                                            |                                                                                      |                                                                                       |
| O – Cytoplasmic (IM)                                                                |                                                                                     |                                                                                      |                                                                                       |
| Other                                                                               |                                                                                     |                                                                                      |                                                                                       |
|   |  |   |   |
| 3NE5                                                                                | AF-P32715                                                                           | AF-P76186                                                                            | AF-P45537                                                                             |
|  |  |  |  |
| P75783_462_727_3ud<br>c                                                             | AF-POAFA5                                                                           | EIISGA_AlphaMulti                                                                    | CPLX0-<br>231_AlphaMulti                                                              |

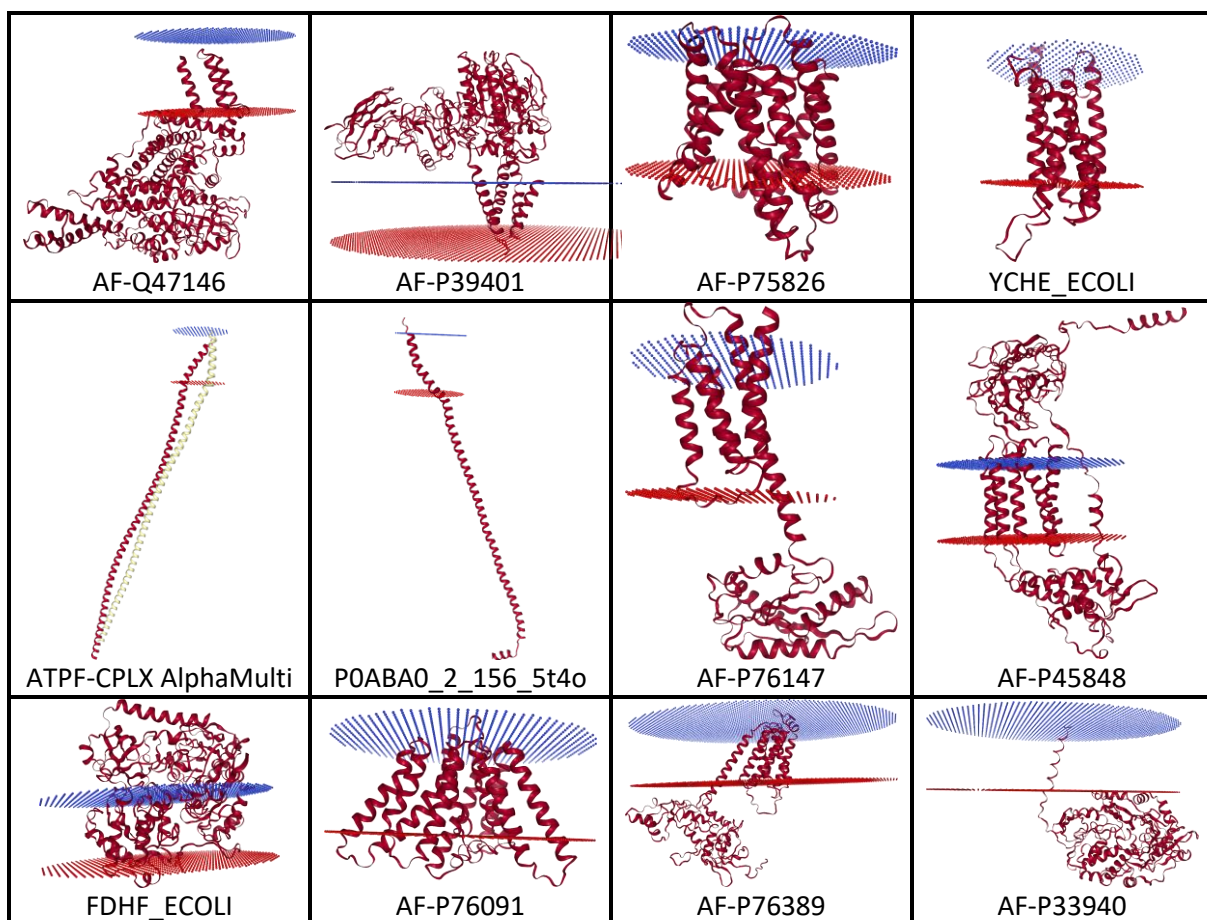

Supplement: Supplementary file 3 [file manual_orient_innerMembrane.pdf › manual_orient_innerMembrane.pdf]
