# Supplementary material for: Establishing comprehensive quaternary structural proteomes from genome sequence
Source: Research Square preprint supplement (doi:10.21203/rs.3.rs-2923626/v1), 2023-05-19

## Manual Orientation of Membrane Proteins

The following proteins were identified as potential membrane proteins by information provided in EcoCyc, iML1515, or Gene Ontology terms for the genes mapped to their subunits. Membrane planes that passed QCQA were identified from at least 1 of 3 methods (OPM/UniProt/TMHMM). These proteins could not be oriented (e.g. there was no topological information provided from UniProt). Manual inspection of the membrane calculations shows these to be membrane proteins. Literature search of the genes mapped to these structures places them in the **Inner Membrane** or **Outer Membrane**.

### Lipoprotein Membrane Structures

|                                                                                     |                                                                                     |                                                                                      |                                                                                       |
|-------------------------------------------------------------------------------------|-------------------------------------------------------------------------------------|--------------------------------------------------------------------------------------|---------------------------------------------------------------------------------------|
| O – Extracellular (OM)                                                              |                                                                                     | Category : Outer Membrane Lipoprotein                                                |                                                                                       |
| N – Periplasmic (OM)                                                                |                                                                                     |                                                                                      |                                                                                       |
| Topological Information Available                                                   |                                                                                     |                                                                                      |                                                                                       |
| 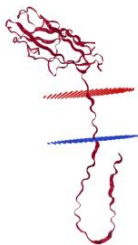   |    |    |    |
| AF-P76501                                                                           | AF-P37018                                                                           | AF-Q2MB16                                                                            | AF-P76297                                                                             |
|   |                                                                                     |                                                                                      |                                                                                       |
| AF-P37651                                                                           |                                                                                     |                                                                                      |                                                                                       |
| N – Extracellular (OM)                                                              |                                                                                     | Category : Outer Membrane Lipoprotein                                                |                                                                                       |
| O – Periplasmic (OM)                                                                |                                                                                     |                                                                                      |                                                                                       |
| Topological Information Available                                                   |                                                                                     |                                                                                      |                                                                                       |
|  |  |  |  |
| AF-P75906                                                                           | AF-P28224                                                                           | AF-P75820                                                                            | AF-P0AGC5                                                                             |
| No information available                                                            |                                                                                     |                                                                                      |                                                                                       |

|                                                                                     |                                                                                      |                                                                                      |                                                                                       |
|-------------------------------------------------------------------------------------|--------------------------------------------------------------------------------------|--------------------------------------------------------------------------------------|---------------------------------------------------------------------------------------|
| 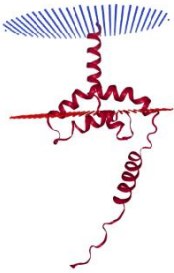   |     |                                                                                      |                                                                                       |
| AF-P0ADM4                                                                           | AF-P0AB31                                                                            |                                                                                      |                                                                                       |
| <b>O – Extracellular (OM)</b>                                                       | Category : <b>Trans-Membrane Lipoprotein</b>                                         |                                                                                      |                                                                                       |
| <b>N – Periplasmic (OM)</b>                                                         |                                                                                      |                                                                                      |                                                                                       |
| Assembly Protein                                                                    |                                                                                      |                                                                                      |                                                                                       |
|    |    |                                                                                      |                                                                                       |
| AF-P37645                                                                           | AF-P46474                                                                            |                                                                                      |                                                                                       |
| <b>O – Periplasmic (IM)</b>                                                         | Category : <b>Inner Membrane Lipoprotein</b>                                         |                                                                                      |                                                                                       |
| <b>N – Cytoplasmic (IM)</b>                                                         |                                                                                      |                                                                                      |                                                                                       |
| Secretion                                                                           |                                                                                      |                                                                                      |                                                                                       |
|  |   |                                                                                      |                                                                                       |
| AF-Q46834                                                                           | AF-Q46943                                                                            |                                                                                      |                                                                                       |
|  |  |                                                                                      |                                                                                       |
| AF-P41442                                                                           | AF-P45760                                                                            |                                                                                      |                                                                                       |
| Pilin                                                                               |                                                                                      |                                                                                      |                                                                                       |
|  |   |  |  |
| AF-P08371                                                                           | AF-P33554                                                                            | AF-P08372                                                                            | AF-P36647                                                                             |

| Periplasmic binding protein                                                         |                                                                                     |                                                                                      |                                                                                       |
|-------------------------------------------------------------------------------------|-------------------------------------------------------------------------------------|--------------------------------------------------------------------------------------|---------------------------------------------------------------------------------------|
| 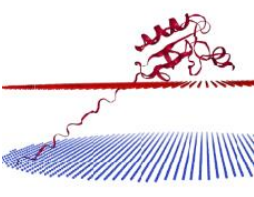   |    |    |    |
| AF-P23857                                                                           | AF-P64506                                                                           | AF-P39297                                                                            | AF-P46022                                                                             |
|    |    |    |    |
| AF-P08506                                                                           | AF-P0AE95                                                                           | AF-P06282                                                                            | AF-P37197                                                                             |
|   |   |   |   |
| AF-P0AFL3                                                                           | AF-P0ADV7                                                                           | AF-P0AC05                                                                            | AF-P32712                                                                             |
|  |  |  |  |
| AF-P37056                                                                           | AF-P65292                                                                           | AF-P65290                                                                            | AF-P77619                                                                             |
|  |  |  |  |
| AF-P0AA57                                                                           | AF-P77091                                                                           | AF-P64548                                                                            | AF-P31121                                                                             |

|                                                                                                      |                                                                                                      |                                                                                                        |                                                                                                       |
|------------------------------------------------------------------------------------------------------|------------------------------------------------------------------------------------------------------|--------------------------------------------------------------------------------------------------------|-------------------------------------------------------------------------------------------------------|
| 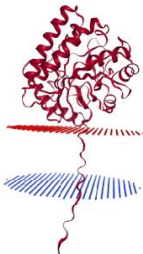 <p>AF-P37325</p>   |  <p>AF-A5A628</p>  |                                                                                                        |                                                                                                       |
| EAL Domain in cytoplasm                                                                              |                                                                                                      |                                                                                                        |                                                                                                       |
|  <p>AF-P77473</p>   |  <p>AF-P76261</p>   |  <p>AF-P75801</p>    |  <p>AF-P75995</p>  |
|  <p>AF-P76446</p>  |  <p>AF-P37649</p>  |  <p>AF-P13518</p>   |  <p>AF-P32701</p> |
|  <p>AF-P14377</p> |  <p>AF-P76330</p> |  <p>AF-P76237</p> |                                                                                                       |
| Cytoplasmic domain                                                                                   |                                                                                                      |                                                                                                        |                                                                                                       |
|  <p>AF-P0A6A0</p> |  <p>AF-Q46942</p> |  <p>AF-P45756</p>  |                                                                                                       |
| Fimbrial chaperone                                                                                   |                                                                                                      |                                                                                                        |                                                                                                       |



|                                                                                                  |                                                                                                  |                                                                                                   |                                                                                                    |
|--------------------------------------------------------------------------------------------------|--------------------------------------------------------------------------------------------------|---------------------------------------------------------------------------------------------------|----------------------------------------------------------------------------------------------------|
| 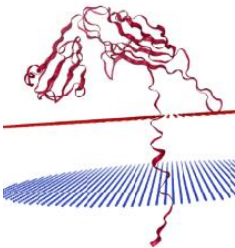<br>AF-P77263   | <br>AF-P77249   | <br>AF-P42914   | <br>AF-P77616   |
| <br>AF-P77599   | <br>AF-P33128   | <br>AF-P33342   | <br>AF-P40876   |
| Assembly protein                                                                                 |                                                                                                  |                                                                                                   |                                                                                                    |
| <br>AF-P77804  | <br>AF-P28249  | <br>AF-P31433   | <br>AF-P52645  |
| No Information                                                                                   |                                                                                                  |                                                                                                   |                                                                                                    |
| <br>AF-P77330 | <br>AF-P33669 | <br>AF-P0ADM6 | <br>AF-P42598 |
| <br>AF-P37615 | <br>AF-P75737 | <br>AF-P33344  | <br>AF-P0AGC7 |

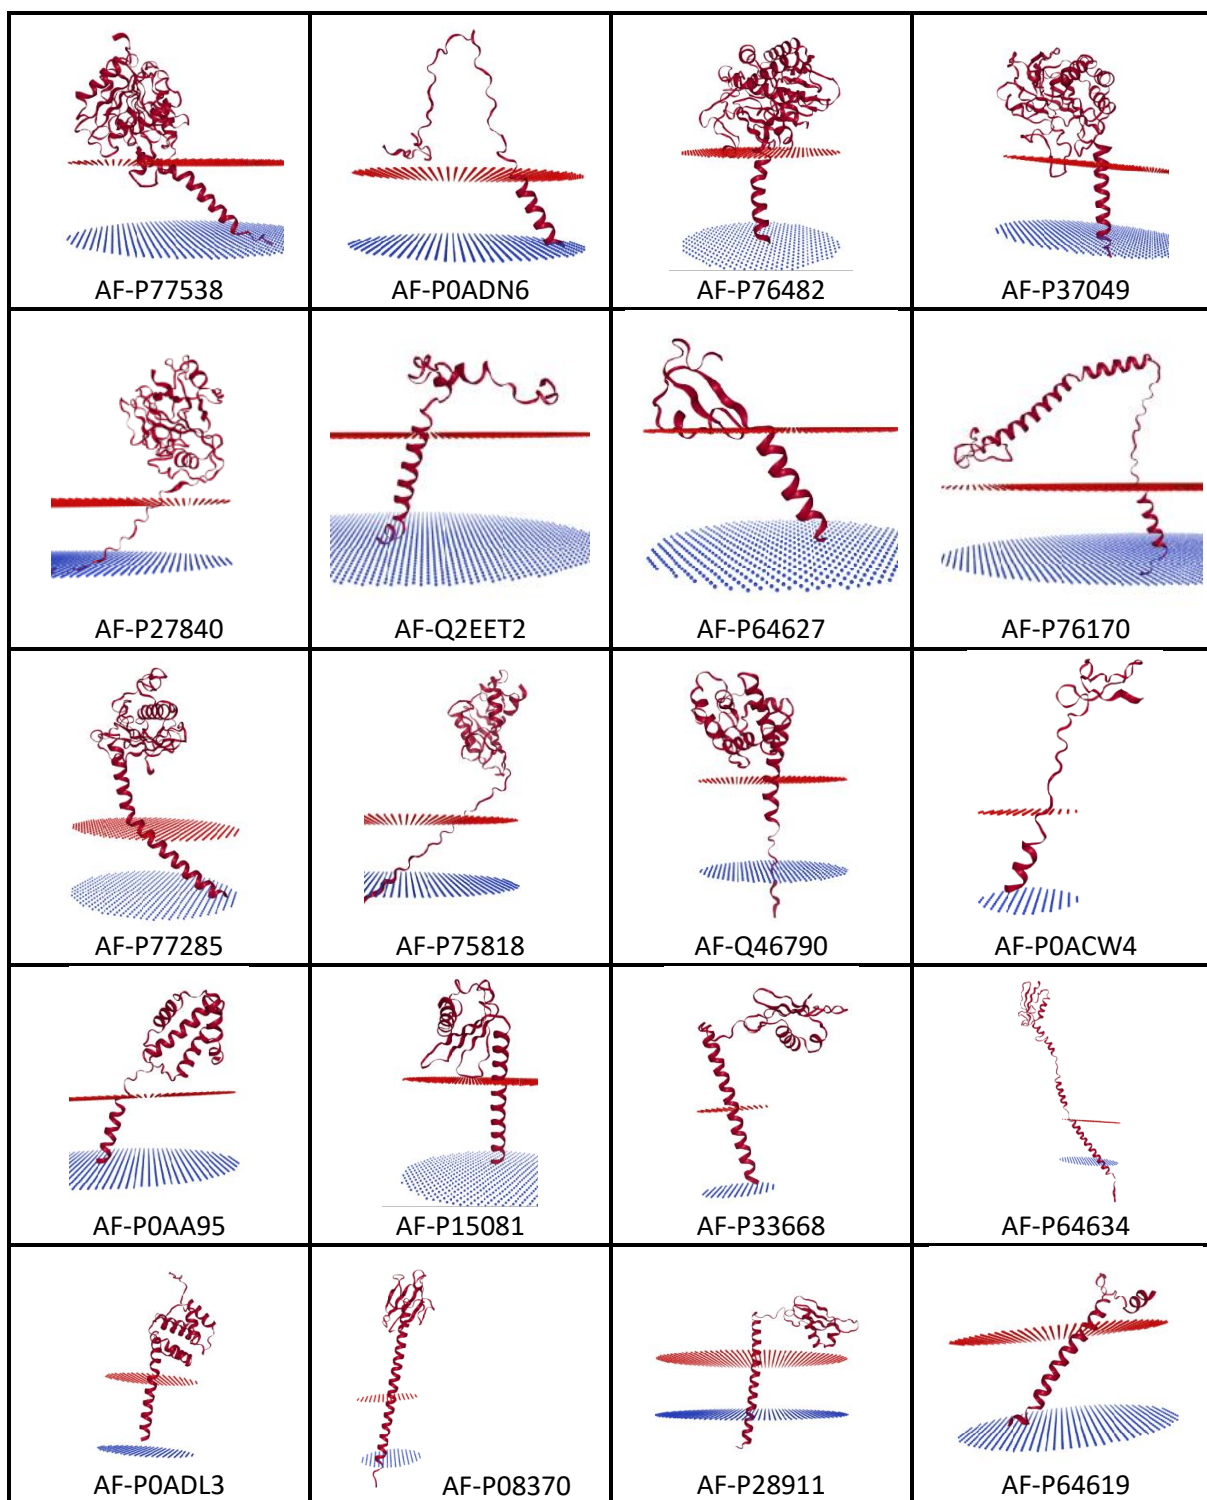

|                                                                                     |                                                                                     |                                                                                      |                                                                                       |
|-------------------------------------------------------------------------------------|-------------------------------------------------------------------------------------|--------------------------------------------------------------------------------------|---------------------------------------------------------------------------------------|
| 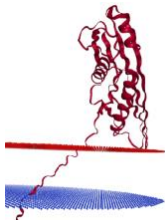   |    |     |    |
| AF-P0ADA5                                                                           | AF-P0AB26                                                                           | AF-P65294                                                                            | AF-P76421                                                                             |
|    |                                                                                     |                                                                                      |                                                                                       |
| AF-P39382                                                                           |                                                                                     |                                                                                      |                                                                                       |
| <b>N – Periplasmic (IM)</b>                                                         | Category : Inner Membrane Lipoprotein                                               |                                                                                      |                                                                                       |
| <b>O – Cytoplasmic (IM)</b>                                                         |                                                                                     |                                                                                      |                                                                                       |
| No Information                                                                      |                                                                                     |                                                                                      |                                                                                       |
|   |   |   |   |
| AF-P36646                                                                           | AF-P0AB35                                                                           | AF-P45751                                                                            | AF-P38392                                                                             |
| Topological Information Available                                                   |                                                                                     |                                                                                      |                                                                                       |
|  |  |  |  |
| AF-P75839                                                                           | AF-P22586                                                                           | AF-P77223                                                                            | AF-P23890                                                                             |
|  |  |  |  |
| AF-P0A6H8                                                                           | AF-P67553                                                                           | AF-P76506                                                                            | AF-P0AB01                                                                             |

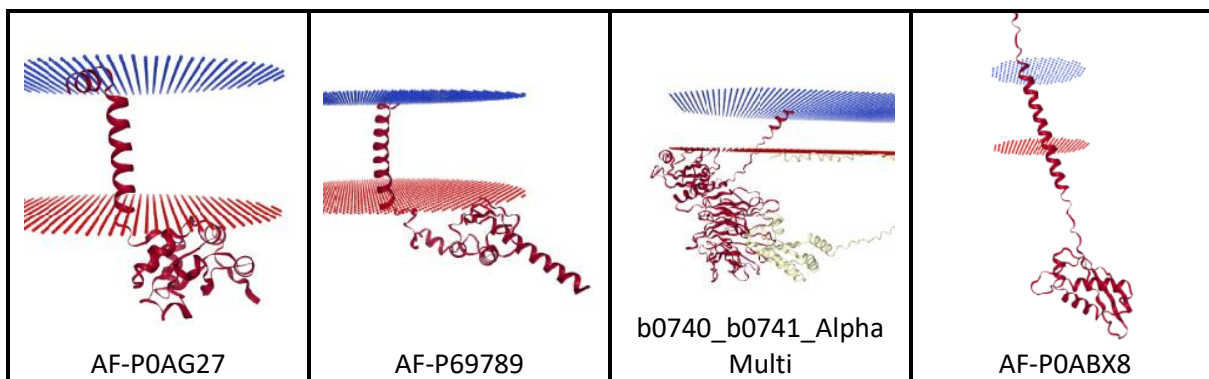

Supplement: Supplementary file 5 [file manual_orient_lipoproteins.pdf › manual_orient_lipoproteins.pdf]
