# Supplementary material for: Establishing comprehensive quaternary structural proteomes from genome sequence
Source: Research Square preprint supplement (doi:10.21203/rs.3.rs-2923626/v1), 2023-05-19
Supplement: Supplementary file 1 [file 2c09a76a58974ba8a1d562d6.xlsx]

## Sheet: Description
Dataset S3
This dataset contains the structural coverage of all protein complexes in the E.coli proteome. Structural coverage is defined as the number of amino acids that can be mapped onto a residue on a protein structure file. This data was drawn from Dataset S1 and is used to generate Fig. 1F.

## Sheet: DatasetS3-StructuralCoverage
	total_aas	total_aas_covered	coverage
CPLX0-2982	8382	8382	1
TAR-CPLX	8278	8278	1
TSR-CPLX	8254	8254	1
TRG-CPLX	8194	8194	1
TAP-CPLX	8038	8038	1
CITLY-CPLX	5460	5460	1
CPLX0-2161	5337	5337	1
EG10456-12.0-MER	4752	4752	1
CPLX0-3901	4632	4632	1
CPLX0-250_FORMATEDEHYDROGH-MONOMER	4253	4253	1
Unmodelled_24-MER_b2294	3936	3936	1
CPLX0-3958	3862	3862	1
CPLX0-4	3825	3825	1
CPLX0-3949	3798	3798	1
CPLX0-1421	3792	3792	1
CPLX-3945	3735	3735	1
CPLX0-7631	3546	3546	1
CPLX0-250	3401	3401	1
CPLX0-2425	3358	3358	1
Unmodelled_OCTAMER_b1581	3232	3232	1
SULFATE-ADENYLYLTRANS-CPLX	3108	3108	1
CPLX0-3061	3018	3018	1
CPLX0-7981	2905	2905	1
CPLX0-3957	2896	2896	1
CPLX0-2201	2830	2830	1
CPLX0-7992	2561	2561	1
CPLX0-1943	2515	2515	1
CPLX0-1942	2488	2488	1
CPLX0-7952	2470	2470	1
Unmodelled_MONOMER_b1978	2358	2358	1
Tgt_hexa	2250	2250	1
FAO-CPLX	2232	2232	1
UVRABC-CPLX	2223	2223	1
CPLX0-201	2200	2200	1
EG11905-MONOMER	2200	2200	1
CPLX0-7609	2166	2166	1
ANTHRANSYN-CPLX	2102	2102	1
GLUTCYSLIG-TETRAMER	2072	2072	1
NITRATREDUCTZ-CPLX	1986	1986	1
CPLX-165	1970	1970	1
CPLX0-981	1950	1950	1
PYRNUTRANSHYDROGEN-CPLX	1944	1944	1
CPLX0-3933	1904	1904	1
CPLX0-3641	1896	1896	1
PKI-COMPLEX	1880	1880	1
ABC-26-CPLX	1838	1838	1
ABC-41-CPLX	1838	1838	1
CPLX0-7976	1836	1836	1
ABC-8-CPLX	1835	1835	1
CPLX0-7844	1834	1834	1
TORS-CPLX	1828	1828	1
EG11910-MONOMER_dimer_EG11911-MONOMER	1822	1822	1
ABC-22-CPLX	1822	1822	1
CPLX0-7697	1816	1816	1
CPLX0-3970	1816	1816	1
CITRYLY-CPLX	1812	1812	1
MENE-CPLX	1804	1804	1
CPLX0-7979	1800	1800	1
ABC-59-CPLX	1790	1790	1
KDPD-CPLX	1788	1788	1
GlucD-GlucDRP	1784	1784	1
CPLX0-7760	1782	1782	1
CPLX0-682	1752	1752	1
ALAS-CPLX	1752	1752	1
ABC-49-CPLX	1744	1744	1
CPLX0-1923	1741	1741	1
NRDACTMULTI-CPLX	1732	1732	1
CPLX0-7761	1730	1730	1
ABC-34-CPLX	1726	1726	1
ABC-25-CPLX	1722	1722	1
CPLX0-7717	1700	1700	1
FORMYLTHFDEFORMYL-CPLX	1680	1680	1
CPLX0-7674	1668	1668	1
FORMHYDROG2-CPLX	1659	1659	1
BcsE2R2Q2	1654	1654	1
CPLX0-8125	1651	1651	1
CPLX0-7788	1646	1646	1
ABC-24-CPLX	1643	1643	1
CPLX0-7975	1640	1640	1
ABC-20-CPLX	1637	1637	1
ABC-7-CPLX	1636	1636	1
Unmodelled_PENTAMER_b1342	1635	1635	1
ABC-51-CPLX	1632	1632	1
ABC-33-CPLX	1629	1629	1
ABC-70-CPLX	1627	1627	1
ASPKINIIHOMOSERDEHYDROGII-CPLX	1620	1620	1
CPLX0-8199	1598	1598	1
GLUCOSAMINE-6-P-DEAMIN-CPLX	1596	1596	1
ABC-304-CPLX	1594	1594	1
ABC-15-CPLX	1592	1592	1
PEPSYNTH-CPLX	1584	1584	1
CORA-PENTAMER	1580	1580	1
CYANLY-CPLX	1560	1560	1
ARCB-CPLX	1556	1556	1
ABC-40-CPLX	1549	1549	1
Unmodelled_MONOMER_b1653	1538	1538	1
EG11910-MONOMER_dimer	1530	1530	1
Unmodelled_MONOMER_b2647	1526	1526	1
ABC-10-CPLX	1524	1524	1
ABC-58-CPLX	1523	1523	1
Unmodelled_MONOMER_b4466	1520	1520	1
ABC-18-CPLX	1510	1510	1
SecYE-CPLX	1508	1508	1
CPLX-158	1502	1502	1
ABC-60-CPLX	1494	1494	1
ABC-46-CPLX	1490	1490	1
ABC-2-CPLX	1489	1489	1
ABC-11-CPLX	1486	1486	1
CPLX0-1863	1482	1482	1
ABC-62-CPLX	1482	1482	1
CPLX0-2361	1479	1479	1
ABC-27-CPLX	1475	1475	1
ACETOLACTSYNIII-CPLX	1474	1474	1
ABC-42-CPLX	1473	1473	1
GLUTKIN-CPLX	1468	1468	1
ORNDECARBOXDEG-CPLX	1464	1464	1
ABC-9-CPLX	1460	1460	1
FADB-CPLX	1458	1458	1
AROC-CPLX	1444	1444	1
YEAV-MONOMER	1443	1443	1
ABC-28-CPLX	1439	1439	1
ATPASE-1-CPLX_no_MONOMER0-12	1429	1429	1
CPLX0-7741	1428	1428	1
Unmodelled_MONOMER_b0497	1426	1426	1
RIBONUCLEOSIDE-TRIP-REDUCT-CPLX	1424	1424	1
ORNDECARBOX-BIO-CPLX	1422	1422	1
ABC-19-CPLX	1419	1419	1
CPLX0-1341	1414	1414	1
Unmodelled_MONOMER_b3482	1411	1411	1
FOCB-MONOMER	1410	1410	1
RlmL_dim	1404	1404	1
CPLX0-7645	1400	1400	1
Unmodelled_MONOMER_b0700	1397	1397	1
METNIQ-METHIONINE-ABC-CPLX	1391	1391	1
GMP-REDUCT-CPLX	1388	1388	1
ABC-64-CPLX	1380	1380	1
ATPD-CPLX	1380	1380	1
Unmodelled_MONOMER_b3593	1377	1377	1
THREODEHYD-CPLX	1364	1364	1
G7945-MONOMER	1360	1360	1
ANGLYC3PDEHYDROG-CPLX	1357	1357	1
ABC-56-CPLX	1355	1355	1
METG-CPLX	1354	1354	1
MHPDHYDROL-PENTAMER	1345	1345	1
CPLX0-7951	1345	1345	1
ADHP-TETRAMER	1344	1344	1
N-ACETYLGLUTPREDUCT-TETRAMER	1336	1336	1
ABC-63-CPLX	1334	1334	1
ABC-48-CPLX	1333	1333	1
F16B-CPLX	1328	1328	1
ABC-32-CPLX	1327	1327	1
Unmodelled_MONOMER_b4696	1325	1325	1
ABC-57-CPLX	1323	1323	1
ACETOLACTSYNI-CPLX	1316	1316	1
CPLX0-1262	1312	1312	1
GLTP-MONOMER	1311	1311	1
CHEA-CPLX	1308	1308	1
DIMESULFREDUCT-CPLX	1306	1306	1
CPLX0-7	1303	1303	1
Unmodelled_MONOMER_b1413	1300	1300	1
CPLX-167	1296	1296	1
PC00040	1296	1296	1
FGAMSYN-MONOMER	1295	1295	1
CPLX-169	1289	1289	1
PHOSPHASERDECARB-DIMER	1288	1288	1
DCTA-MONOMER	1284	1284	1
CPLX0-3929	1284	1284	1
THRS-CPLX	1284	1284	1
6PFK-1-CPX	1280	1280	1
ABC-23-CPLX	1274	1274	1
CPLX-166	1274	1274	1
ABC-35-CPLX	1266	1266	1
Unmodelled_MONOMER_b4472	1266	1266	1
ABC-61-CPLX	1260	1260	1
CPLX0-7458	1256	1256	1
DHPDIOXYGEN-CPLX	1256	1256	1
ABC-13-CPLX	1254	1254	1
Unmodelled_MONOMER_b2233	1250	1250	1
CPLX-154	1250	1250	1
CPLX0-2641	1248	1248	1
YGJU-MONOMER	1242	1242	1
ABC-3-CPLX	1240	1240	1
CPLX0-7819	1240	1240	1
CPLX0-743	1240	1240	1
ABC-14-CPLX	1240	1240	1
TMAOREDUCTI-CPLX	1238	1238	1
DIHYDROXYACIDDEHYDRAT-CPLX	1232	1232	1
HOMOCYSMETB12-MONOMER	1227	1227	1
CPLX0-7870	1216	1216	1
CPLX0-1841	1215	1215	1
ABC-29-CPLX	1215	1215	1
Unmodelled_MONOMER_b2118	1210	1210	1
CPLX0-8152	1210	1210	1
MALTODEXGLUCOSID-DIMER	1208	1208	1
NRFMULTI-CPLX	1207	1207	1
FORMHYDROGI-CPLX	1204	1204	1
CPLX0-761	1203	1203	1
NUPC-MONOMER	1200	1200	1
Unmodelled_MONOMER_b2370	1197	1197	1
NARX-CPLX	1196	1196	1
CPLX0-7933	1188	1188	1
CPLX0-8120	1187	1187	1
ABC-4-CPLX	1187	1187	1
EIISGA	1185	1185	1
METHYLENETHFREDUCT-CPLX	1184	1184	1
ASPS-CPLX	1180	1180	1
NAPAB-CPLX_NAPC-MONOMER	1177	1177	1
CPLX0-1683	1176	1176	1
THIH-MONOMER_THIF-MONOMER_THII-MONOMER_THIS-MONOMER	1176	1176	1
CPLX-63	1175	1175	1
DIHYDRODIPICSYN-CPLX	1168	1168	1
ABC-12-CPLX	1166	1166	1
ABC-6-CPLX	1161	1161	1
CPLX0-7885	1160	1160	1
Unmodelled_MONOMER_b3530	1157	1157	1
CPLX0-1668	1150	1150	1
Mfd_mono	1148	1148	1
ABC-54-CPLX	1148	1148	1
CPLX0-231	1146	1146	1
PROS-CPLX	1144	1144	1
THIOESTERII-CPLX	1144	1144	1
CPLX0-7745	1140	1140	1
KDO-8PSYNTH-CPLX	1136	1136	1
NARQ-CPLX	1132	1132	1
CPLX0-1669	1132	1132	1
RIBULOKIN-CPLX	1132	1132	1
OmpN_tri	1131	1131	1
G6700-TRIMER	1131	1131	1
ABC-21-CPLX	1128	1128	1
CPLX0-1101	1125	1125	1
CPLX-157	1123	1123	1
CPLX0-7675	1122	1122	1
Unmodelled_MONOMER_b0465	1120	1120	1
Unmodelled_MONOMER_b1372	1120	1120	1
CPLX-168	1115	1115	1
G6960-TETRAMER	1112	1112	1
CPLX0-7525	1112	1112	1
Unmodelled_MONOMER_b2067	1105	1105	1
yddL_CPLX	1098	1098	1
CPLX0-7877	1098	1098	1
RHAMNULPALDOL-CPLX	1096	1096	1
FUMARATE-REDUCTASE	1096	1096	1
FUMARASE-B	1096	1096	1
FUMARASE-A	1096	1096	1
NmPC-CPLX	1095	1095	1
Unmodelled_MONOMER_b2549	1093	1093	1
CPLX0-246_CPLX0-1342	1088	1088	1
AICARTRANSIMPCYCLO-CPLX	1058	1058	1
CPLX0-1162	1056	1056	1
BamAD-CPLX	1055	1055	1
SECD-SECF-YAJC-YIDC-CPLX	1048	1048	1
2-ISOPROPYLMALATESYN-MONOMER	1046	1046	1
Unmodelled_MONOMER_b2000	1039	1039	1
Unmodelled_MONOMER_b2878	1032	1032	1
CPLX0-8016	1023	1023	1
UDPHYDROXYMYRGLUCOSAMNACETYLTRANS-TRI	1023	1023	1
7-ALPHA-HYDROXYSTEROID-DEH-CPLX	1020	1020	1
Unmodelled_MONOMER_b1687	1018	1018	1
Unmodelled_TETRAMER_b2842	1012	1012	1
LTARTDEHYDRA-CPLX	1008	1008	1
CPLX0-1762	1008	1008	1
CPLX0-2901	1008	1008	1
CPLX0-8188	1002	1002	1
CPLX0-7642	1000	1000	1
Unmodelled_TETRAMER_b0675	1000	1000	1
PHENDEHYD-CPLX	998	998	1
LYXK-CPLX	996	996	1
ENTA-CPLX	992	992	1
CPLX0-1962	992	992	1
Unmodelled_MONOMER_b0568	990	990	1
PPPGPPHYDRO-CPLX	988	988	1
SUCCGLUALDDEHYD-MONOMER	984	984	1
G7517-MONOMER	984	984	1
CPLX0-1621	978	978	1
CPLX0-7628	977	977	1
NAP-CPLX	977	977	1
CPLX0-3001	970	970	1
CPLX0-7466	968	968	1
Unmodelled_MONOMER_b4580	968	968	1
NITRITREDUCT-CPLX	955	955	1
Unmodelled_MONOMER_b1202	955	955	1
Unmodelled_MONOMER_b2218	949	949	1
CREC-CPLX	948	948	1
Unmodelled_MONOMER_b3053	946	946	1
G6176-MONOMER_G6177-MONOMER_G6178-MONOMER	945	945	1
GLNG-CPLX	938	938	1
PC00005	936	936	1
ASNS-CPLX	932	932	1
CPLX0-8539	931	931	1
EG12287-MONOMER	924	924	1
CPLX0-7653	924	924	1
CPLX0-7687	924	924	1
CPLX0-8218	920	920	1
Unmodelled_MONOMER_b2786	918	918	1
SIROHEMESYN-CPLX	914	914	1
G7860-MONOMER	912	912	1
Unmodelled_MONOMER_b3486	911	911	1
TRANS-CPLX-203	910	910	1
CPLX0-7622	908	908	1
CPLX0-7608	908	908	1
Unmodelled_MONOMER_b4486	906	906	1
ALPHAGALACTOSID-CPLX	902	902	1
Unmodelled_MONOMER_b3418	901	901	1
CYT-D-UBIOX-CPLX	901	901	1
ENVZ-CPLX	900	900	1
Unmodelled_MONOMER_b3338	897	897	1
APP-UBIOX-CPLX	892	892	1
Unmodelled_MONOMER_b0167	890	890	1
Unmodelled_MONOMER_b2216	890	890	1
InfB_mono	890	890	1
PYRUVFORMLY-MONOMER_EG11784-MONOMER	887	887	1
Unmodelled_MONOMER_b2584	886	886	1
DEOA-CPLX	880	880	1
CPLX0-7698	880	880	1
Unmodelled_MONOMER_b1381	879	879	1
EG13236-MONOMER	877	877	1
Unmodelled_MONOMER_b1834	877	877	1
ACETOACETYL-COA-TRANSFER-CPLX	872	872	1
HISTDEHYD-CPLX	868	868	1
Unmodelled_MONOMER_b1350	866	866	1
Unmodelled_MONOMER_b0139	865	865	1
Unmodelled_MONOMER_b2190	863	863	1
MENF-CPLX	862	862	1
PHOR-CPLX	862	862	1
LeuS_mono	860	860	1
SERS-CPLX	860	860	1
CPLX-7	858	858	1
GSAAMINOTRANS-CPLX	852	852	1
GABATRANSAM-CPLX	852	852	1
ADENYLATECYC-MONOMER	848	848	1
CPLX0-3930	848	848	1
Unmodelled_MONOMER_b1049	847	847	1
Unmodelled_MONOMER_b0291	841	841	1
UDPMANNACADEHYDROG-MONOMER	840	840	1
CPLX0-7624	838	838	1
CPLX0-3741	836	836	1
G6260-MONOMER	834	834	1
ISOCITHASE-CPLX	832	832	1
Unmodelled_MONOMER_b2383	831	831	1
CPLX0-7887	824	824	1
CPLX-7524	822	822	1
ACYLCOADEHYDROG-MONOMER	814	814	1
Unmodelled_MONOMER_b4179	813	813	1
FABB-CPLX	812	812	1
Unmodelled_MONOMER_b1024	807	807	1
GLYCEROL-3-P-ACYLTRANSFER-MONOMER	807	807	1
CPLX0-8174	798	798	1
CPLX0-3976_edit	798	798	1
DXPREDISOM-CPLX	796	796	1
GLUCDEHYDROG-MONOMER	796	796	1
CPLX0-1401	796	796	1
TYRB-DIMER	794	794	1
Unmodelled_MONOMER_b3216	793	793	1
ASPAMINOTRANS-DIMER	792	792	1
ATPE-CPLX	790	790	1
EG12130-MONOMER_EG12131-MONOMER	787	787	1
THZ-KIN-MONOMER	786	786	1
UDPNACETYLGLUCOSAMACYLTRANS-CPLX	786	786	1
Unmodelled_MONOMER_b0060	783	783	1
Unmodelled_MONOMER_b0833	782	782	1
UGD-DIMER	776	776	1
FADA-CPLX	774	774	1
CPLX0-7667	774	774	1
FEOB-MONOMER	773	773	1
CPLX0-8249	772	772	1
CHORISMUTPREPHENDEHYDRAT-CPLX	772	772	1
Unmodelled_MONOMER_b1407	768	768	1
LACTALDREDUCT-CPLX	764	764	1
MANNPDEHYDROG-DIMER	764	764	1
Unmodelled_MONOMER_b4359	763	763	1
GLY3KIN-MONOMER	762	762	1
B1-CPLX	761	761	1
Unmodelled_MONOMER_b2120	759	759	1
Unmodelled_MONOMER_b1501	759	759	1
Unmodelled_MONOMER_b1316	755	755	1
Unmodelled_MONOMER_b0913	754	754	1
CPLX0-1321	753	753	1
DnaJ_dim	752	752	1
UDPGLCNACEPIM-DIMER	752	752	1
RFFTRANS-DIMER	752	752	1
CPLX0-8008	752	752	1
CPLX0-7990	752	752	1
Unmodelled_MONOMER_b4462	750	750	1
Unmodelled_MONOMER_b2503	747	747	1
CHORISMUTPREPHENDEHYDROG-CPLX	746	746	1
Unmodelled_MONOMER_b0569	745	745	1
SPERMACTRAN-CPLX	744	744	1
Unmodelled_MONOMER_b4109	742	742	1
Unmodelled_MONOMER_b1629	740	740	1
Unmodelled_MONOMER_b4469	739	739	1
ADHC-CPLX	738	738	1
GALPMUT-DIMER	734	734	1
ASP-SEMIALDEHYDE-DEHYDROGENASE-CPLX	734	734	1
CPLX0-3761	732	732	1
Unmodelled_MONOMER_b2395	729	729	1
Unmodelled_MONOMER_b2627	729	729	1
Unmodelled_MONOMER_b4017	728	728	1
Unmodelled_MONOMER_b0981	726	726	1
3-ISOPROPYLMALDEHYDROG-CPLX	726	726	1
DTDPGLUCDEHYDRAT-CPLX	722	722	1
CPLX0-8182	721	721	1
AAS-MONOMER	719	719	1
ALARACEBIOSYN-DIMER	718	718	1
DMBPPRIBOSYLTRANS-CPLX	718	718	1
Unmodelled_MONOMER_b0960	717	717	1
Unmodelled_MONOMER_b4354	716	716	1
G7090-MONOMER_EG11982-MONOMER	714	714	1
CPLX0-7465	712	712	1
CPLX0-240	712	712	1
Unmodelled_MONOMER_b3398	711	711	1
SAICARSYN-CPLX	711	711	1
IMIDHISTID-CPLX	710	710	1
PURK-CPLX	710	710	1
CPLX0-241	704	704	1
Unmodelled_MONOMER_b0598	701	701	1
Unmodelled_DIMER_b0769	700	700	1
Unmodelled_MONOMER_b1673	700	700	1
Unmodelled_MONOMER_b3358	700	700	1
CPLX0-3925	700	700	1
Unmodelled_MONOMER_b1451	700	700	1
Unmodelled_MONOMER_b0984	698	698	1
GLNL-CPLX	698	698	1
Unmodelled_MONOMER_b4029	698	698	1
AROH-CPLX	696	696	1
Unmodelled_MONOMER_b3652	693	693	1
Unmodelled_DIMER_b2834	692	692	1
GALACTITOLPDEHYD-DIMER	692	692	1
Unmodelled_MONOMER_b2731	692	692	1
CPLX0-7927	690	690	1
CPLX-170	688	688	1
Unmodelled_MONOMER_b3524	686	686	1
IDONDEHYD-DIMER	686	686	1
Unmodelled_MONOMER_b0962	684	684	1
CPLX-3942	684	684	1
CPLX0-7740	682	682	1
Unmodelled_MONOMER_b1456	682	682	1
SECE-G-Y-CPLX	680	680	1
CPLX0-7627	680	680	1
cisGroES_hepta	679	679	1
transGroES_hepta	679	679	1
GLYC3PDEHYDROGBIOSYN-CPLX	678	678	1
ANSA-CPLX	676	676	1
ALPHA-AMYL-PERI-MONOMER	676	676	1
UDPGLUCEPIM-CPLX	676	676	1
CPLX-155	674	674	1
Unmodelled_MONOMER_b3081	672	672	1
EIISGC	672	672	1
Unmodelled_MONOMER_b1023	672	672	1
CPLX0-303	672	672	1
EG10534-MONOMER	671	671	1
Unmodelled_MONOMER_b1645	670	670	1
Unmodelled_MONOMER_b2491	670	670	1
TRPS-CPLX	668	668	1
3-ISOPROPYLMALISOM-CPLX	667	667	1
CPLX0-2061	664	664	1
Unmodelled_MONOMER_b3529	662	662	1
Unmodelled_MONOMER_b1285	661	661	1
Unmodelled_DIMER_b3753	660	660	1
Unmodelled_MONOMER_b2468	659	659	1
CPLX-163	658	658	1
Unmodelled_MONOMER_b0269	655	655	1
Unmodelled_MONOMER_b4297	655	655	1
Unmodelled_MONOMER_b1435	653	653	1
Unmodelled_MONOMER_b1763	653	653	1
ACS-MONOMER	652	652	1
CPLX0-3956	649	649	1
CPLX0-235	648	648	1
Unmodelled_DIMER_b3253	648	648	1
Unmodelled_MONOMER_b2070	648	648	1
Unmodelled_MONOMER_b2196	647	647	1
CPDB-MONOMER	647	647	1
Unmodelled_MONOMER_b3252	646	646	1
CPLX0-7921	646	646	1
Unmodelled_MONOMER_b1783	644	644	1
CPLX0-782	642	642	1
CPLX0-7776	642	642	1
PABASYN-CPLX	640	640	1
Unmodelled_DIMER_b0800	640	640	1
KDPGALDOL-4OH2OXOGLUTARALDOL-CPLX	639	639	1
NICONUCADENYLYLTRAN-TRIMER	639	639	1
Unmodelled_MONOMER_b1201	639	639	1
Unmodelled_MONOMER_b2887	639	639	1
Unmodelled_MONOMER_b3352	637	637	1
Unmodelled_DIMER_b4352	636	636	1
Unmodelled_MONOMER_b0949	635	635	1
CPLX0-252	634	634	1
CPLX0-7759	634	634	1
CPLX0-7731	632	632	1
CPLX-159	631	631	1
Unmodelled_MONOMER_b1268	631	631	1
CPLX0-7854	630	630	1
Unmodelled_MONOMER_b3162	629	629	1
1-PFK	624	624	1
MALATE-DEHASE	624	624	1
G6539-DIMER	624	624	1
URACIL-PRIBOSYLTRANS-CPLX	624	624	1
Unmodelled_MONOMER_b0441	623	623	1
YdaO_dim	622	622	1
KUP-MONOMER	622	622	1
CPLX0-7713	622	622	1
HOMOSERKIN-CPLX	620	620	1
SecB_tetra	620	620	1
6PFK-2-CPX	618	618	1
CPLX0-7724	618	618	1
Unmodelled_MONOMER_b0117	617	617	1
Unmodelled_MONOMER_b2064	617	617	1
CPLX0-7695	616	616	1
CPLX0-7425	616	616	1
DEHYDDEOXPHOSGALACT-ALDOL-TRIMER	615	615	1
Unmodelled_MONOMER_b2122	614	614	1
SelB_mono	614	614	1
DALADALALIGB-CPLX	612	612	1
Unmodelled_DIMER_b1327	612	612	1
CPLX0-1461	612	612	1
AGMATIN-CPLX	612	612	1
Unmodelled_MONOMER_b2292	610	610	1
CPLX0-3601	610	610	1
CPLX-156	609	609	1
CPLX0-7970	606	606	1
Unmodelled_MONOMER_b4253	604	604	1
KEFB-MONOMER	601	601	1
CPLX0-7614	598	598	1
CPLX0-7808	598	598	1
CPLX0-3959	596	596	1
CPLX0-7732	596	596	1
QUINOPRIBOTRANS-CPLX	594	594	1
EG12384-MONOMER	594	594	1
CPLX0-7669	594	594	1
Unmodelled_MONOMER_b2869	592	592	1
ACPSUB-CPLX	588	588	1
CYTIDEAM-CPLX	588	588	1
Unmodelled_MONOMER_b0955	586	586	1
Unmodelled_MONOMER_b2188	586	586	1
Unmodelled_MONOMER_b1410	585	585	1
Unmodelled_DIMER_b3379	584	584	1
PC00003	584	584	1
Unmodelled_MONOMER_b3897	582	582	1
CPLX0-3561	580	580	1
Unmodelled_MONOMER_b0229	579	579	1
DCTP-DEAM-CPLX	579	579	1
CPLX0-7944	578	578	1
CPLX0-7994	578	578	1
Unmodelled_MONOMER_b1191	578	578	1
Unmodelled_MONOMER_b3955	577	577	1
ArgS_mono	577	577	1
PTSI-MONOMER	575	575	1
Unmodelled_MONOMER_b2270	575	575	1
Unmodelled_MONOMER_b3402	574	574	1
PDXY-DIMER	574	574	1
CPLX0-3971	573	573	1
YIDK-MONOMER	571	571	1
CPLX0-7613	570	570	1
GLUTRACE-CPLX	570	570	1
Unmodelled_MONOMER_b3655	569	569	1
Unmodelled_MONOMER_b2642	567	567	1
CPLX0-227	566	566	1
Unmodelled_MONOMER_b0445	566	566	1
Unmodelled_MONOMER_b2380	565	565	1
DSBD-MONOMER	565	565	1
CPLX0-3501	564	564	1
Unmodelled_MONOMER_b1956	564	564	1
H2PTEROATESYNTH-CPLX	564	564	1
EG12267-MONOMER	563	563	1
CPLX0-236	562	562	1
Unmodelled_MONOMER_b2230	562	562	1
Unmodelled_MONOMER_b2126	561	561	1
Unmodelled_MONOMER_b1496	561	561	1
Unmodelled_MONOMER_b0847	561	561	1
Unmodelled_MONOMER_b1498	560	560	1
B2975-MONOMER	560	560	1
Unmodelled_MONOMER_b3538	559	559	1
YCHM-MONOMER	559	559	1
Unmodelled_MONOMER_b0478	558	558	1
RpsA_mono	557	557	1
CHD-MONOMER	556	556	1
PC00086	556	556	1
CPLX0-2861	556	556	1
MHPHYDROXY-MONOMER	554	554	1
Unmodelled_DIMER_b1159	554	554	1
GlnS_mono	554	554	1
Unmodelled_MONOMER_b3051	553	553	1
Unmodelled_MONOMER_b3685	553	553	1
Unmodelled_MONOMER_b0876	552	552	1
Unmodelled_MONOMER_b0619	552	552	1
Unmodelled_MONOMER_b4074	552	552	1
LCTP-MONOMER	551	551	1
Unmodelled_MONOMER_b3801	551	551	1
TRE6PHYDRO-MONOMER	551	551	1
Unmodelled_MONOMER_b1424	551	551	1
Unmodelled_MONOMER_b0069	551	551	1
G7170-MONOMER	550	550	1
NAD-SYNTH-CPLX	550	550	1
USHA-MONOMER	550	550	1
Unmodelled_MONOMER_b4065	549	549	1
CPLX0-7955	549	549	1
Unmodelled_MONOMER_b2226	549	549	1
TREHALACYTO-MONOMER	549	549	1
CPLX0-3181	548	548	1
CPLX0-7766	548	548	1
EG12069-MONOMER	548	548	1
CPLX0-7997	548	548	1
Unmodelled_MONOMER_b0290	547	547	1
Unmodelled_MONOMER_b2211	547	547	1
Unmodelled_MONOMER_b1985	547	547	1
2-OCTAPRENYLPHENOL-HYDROX-MONOMER	546	546	1
G6523-MONOMER_G6518-MONOMER	546	546	1
Unmodelled_MONOMER_b0951	546	546	1
Unmodelled_MONOMER_b4125	543	543	1
Unmodelled_MONOMER_b4020	543	543	1
Unmodelled_MONOMER_b3173	541	541	1
CPLX0-8238	541	541	1
Unmodelled_MONOMER_b2875	541	541	1
L-ASPARTATE-OXID-MONOMER	540	540	1
Unmodelled_MONOMER_b3488	540	540	1
Unmodelled_MONOMER_b2628	538	538	1
Unmodelled_MONOMER_b3720	538	538	1
ADCLY-CPLX	538	538	1
Unmodelled_MONOMER_b4660	535	535	1
Unmodelled_MONOMER_b1668	534	534	1
Unmodelled_MONOMER_b1815	532	532	1
HMP-P-KIN-CPLX	532	532	1
Unmodelled_MONOMER_b3422	532	532	1
ANTHRANSYNCOMPII-MONOMER	531	531	1
Unmodelled_MONOMER_b1511	530	530	1
Unmodelled_MONOMER_b0330	528	528	1
Unmodelled_MONOMER_b4061	528	528	1
THYMIDYLATESYN-CPLX	528	528	1
Unmodelled_MONOMER_b0815	527	527	1
Unmodelled_MONOMER_b2063	527	527	1
GLUCONOKINII-CPLX	525	525	1
CPLX0-2541	524	524	1
Unmodelled_MONOMER_b4342	521	521	1
Unmodelled_MONOMER_b2176	518	518	1
Unmodelled_MONOMER_b1816	518	518	1
CPLX0-3241	518	518	1
EG11373-MONOMER	518	518	1
CPLX-171	516	516	1
ACETYLGLUTKIN-CPLX	516	516	1
Unmodelled_MONOMER_b4380	516	516	1
Unmodelled_MONOMER_b0457	516	516	1
Unmodelled_MONOMER_b0320	515	515	1
Unmodelled_MONOMER_b4167	515	515	1
Unmodelled_MONOMER_b1323	513	513	1
NHAB-MONOMER	513	513	1
Unmodelled_MONOMER_b4133	512	512	1
Unmodelled_MONOMER_b1048	511	511	1
Unmodelled_MONOMER_b2001	510	510	1
Unmodelled_MONOMER_b1188	510	510	1
Unmodelled_MONOMER_b1336	508	508	1
Unmodelled_MONOMER_b0544	508	508	1
Unmodelled_MONOMER_b1168	507	507	1
Unmodelled_MONOMER_b3072	506	506	1
EG11817-DIMER	506	506	1
Unmodelled_MONOMER_b2298	506	506	1
Unmodelled_MONOMER_b3765	506	506	1
Unmodelled_MONOMER_b2709	504	504	1
AROD-CPLX	504	504	1
Unmodelled_MONOMER_b1614	502	502	1
CPLX0-7934	500	500	1
Unmodelled_MONOMER_b4156	500	500	1
Unmodelled_MONOMER_b3668	500	500	1
Unmodelled_MONOMER_b4263	500	500	1
CPLX0-7797	500	500	1
PITB-MONOMER	499	499	1
ANSP-MONOMER	499	499	1
PITA-MONOMER	499	499	1
Unmodelled_MONOMER_b3527	498	498	1
Unmodelled_MONOMER_b3678	497	497	1
FtsY_MONOMER	497	497	1
NANT-MONOMER	496	496	1
Unmodelled_MONOMER_b1786	496	496	1
ALTRODEHYDRAT-MONOMER	495	495	1
NusA_mono	495	495	1
Unmodelled_MONOMER_b2046	492	492	1
Unmodelled_MONOMER_b2776	492	492	1
AMPG-MONOMER	491	491	1
Unmodelled_MONOMER_b1785	491	491	1
EG11595-MONOMER_EG11666-MONOMER	490	490	1
LYSP-MONOMER	489	489	1
Unmodelled_MONOMER_b3323	489	489	1
Unmodelled_MONOMER_b2172	488	488	1
B0612-MONOMER	487	487	1
YGJE-MONOMER	487	487	1
Unmodelled_DIMER_b2593	486	486	1
CARDIOLIPSYN-MONOMER	486	486	1
Unmodelled_MONOMER_b1129	486	486	1
MANNONOXIDOREDUCT-MONOMER	486	486	1
Unmodelled_MONOMER_b2715	485	485	1
B0511-MONOMER	484	484	1
PANF-MONOMER	483	483	1
Unmodelled_MONOMER_b0649	483	483	1
Unmodelled_MONOMER_b3745	483	483	1
ThiI_mono	482	482	1
Unmodelled_MONOMER_b2888	482	482	1
PC00103	480	480	1
Unmodelled_MONOMER_b0570	480	480	1
CPLX0-7909	480	480	1
CPLX0-244	480	480	1
PHOSPHO-OMPR	478	478	1
MANNPGUANYLTRANGDP-MONOMER	478	478	1
CPLX0-7721	478	478	1
Unmodelled_MONOMER_b0770	477	477	1
Unmodelled_MONOMER_b3078	477	477	1
Unmodelled_MONOMER_b0703	477	477	1
RpoN_mono	477	477	1
GLYCOGENSYN-MONOMER	477	477	1
Unmodelled_MONOMER_b0899	476	476	1
Unmodelled_MONOMER_b0869	476	476	1
Unmodelled_MONOMER_b3861	476	476	1
YAAJ-MONOMER	476	476	1
Unmodelled_MONOMER_b2556	475	475	1
Unmodelled_MONOMER_b3754	475	475	1
Unmodelled_MONOMER_b3832	475	475	1
Unmodelled_MONOMER_b0646	475	475	1
Unmodelled_MONOMER_b0708	472	472	1
TrmH_dim	472	472	1
Unmodelled_MONOMER_b0321	472	472	1
Unmodelled_MONOMER_b2077	471	471	1
Unmodelled_MONOMER_b4340	470	470	1
Unmodelled_MONOMER_b2625	469	469	1
Unmodelled_MONOMER_b1439	468	468	1
Unmodelled_MONOMER_b2451	467	467	1
Unmodelled_MONOMER_b2078	467	467	1
Unmodelled_MONOMER_b3876	467	467	1
Unmodelled_MONOMER_b3702	467	467	1
B0260-MONOMER	467	467	1
YGFO-MONOMER	466	466	1
Unmodelled_MONOMER_b0281	466	466	1
Unmodelled_MONOMER_b3518	465	465	1
Unmodelled_MONOMER_b4003	465	465	1
Unmodelled_MONOMER_b2047	464	464	1
Unmodelled_MONOMER_b2043	464	464	1
CPLX0-1541	464	464	1
Unmodelled_MONOMER_b1220	464	464	1
CPLX0-7986	463	463	1
Unmodelled_MONOMER_b1729	463	463	1
UHPT-MONOMER	463	463	1
YICE-MONOMER	463	463	1
CysS_mono	461	461	1
Unmodelled_MONOMER_b3877	461	461	1
B1296-MONOMER	461	461	1
DCUC-MONOMER	461	461	1
Unmodelled_MONOMER_b3657	460	460	1
ARCD-MONOMER	460	460	1
Unmodelled_DIMER_b2840	460	460	1
Unmodelled_MONOMER_b0324	460	460	1
Unmodelled_MONOMER_b4389	460	460	1
TORR-CPLX	460	460	1
Unmodelled_MONOMER_b4044	459	459	1
Unmodelled_MONOMER_b1775	459	459	1
PHEP-MONOMER	458	458	1
CPLX0-7822	458	458	1
Unmodelled_MONOMER_b2852	458	458	1
Unmodelled_MONOMER_b1343	457	457	1
HEMN-MONOMER	457	457	1
Unmodelled_MONOMER_b1663	457	457	1
Unmodelled_MONOMER_b1616	457	457	1
Unmodelled_MONOMER_b1828	457	457	1
Unmodelled_MONOMER_b3911	457	457	1
CPLX0-7422	456	456	1
Unmodelled_MONOMER_b1149	455	455	1
Unmodelled_MONOMER_b4464	455	455	1
Unmodelled_MONOMER_b3227	455	455	1
GLUTAMIDOTRANS-CPLX	454	454	1
Unmodelled_MONOMER_b2740	454	454	1
Unmodelled_DIMER_b1317	454	454	1
Unmodelled_MONOMER_b2081	453	453	1
Unmodelled_MONOMER_b0211	452	452	1
Unmodelled_MONOMER_b1025	452	452	1
GLPT-MONOMER	452	452	1
Unmodelled_MONOMER_b2014	452	452	1
Unmodelled_MONOMER_b1968	452	452	1
Unmodelled_MONOMER_b1769	452	452	1
CPLX0-3281	452	452	1
Unmodelled_MONOMER_b4400	450	450	1
EG10144-MONOMER	450	450	1
Unmodelled_MONOMER_b2069	450	450	1
Unmodelled_MONOMER_b4064	449	449	1
Unmodelled_MONOMER_b3026	449	449	1
Unmodelled_MONOMER_b4296	449	449	1
GNTP-MONOMER	447	447	1
Unmodelled_MONOMER_b4218	447	447	1
DCUB-MONOMER	446	446	1
GNTU-MONOMER	446	446	1
Unmodelled_MONOMER_b2771	445	445	1
EG11724-MONOMER	445	445	1
Unmodelled_MONOMER_b2365	445	445	1
Unmodelled_MONOMER_b3664	444	444	1
Unmodelled_MONOMER_b2554	444	444	1
Unmodelled_MONOMER_b2576	444	444	1
CADB-MONOMER	444	444	1
TDCC-MONOMER	443	443	1
Unmodelled_MONOMER_b4385	443	443	1
Unmodelled_MONOMER_b2352	443	443	1
Unmodelled_MONOMER_b3110	443	443	1
Unmodelled_MONOMER_b2879	442	442	1
Unmodelled_MONOMER_b4038	442	442	1
Unmodelled_MONOMER_b4278	442	442	1
Unmodelled_MONOMER_b0834	442	442	1
CPLX0-7916	441	441	1
EG11671-MONOMER	440	440	1
Unmodelled_MONOMER_b1856	440	440	1
Unmodelled_MONOMER_b3523	440	440	1
Unmodelled_MONOMER_b3667	439	439	1
BRNQ-MONOMER	439	439	1
Unmodelled_MONOMER_b1491	439	439	1
POTE-MONOMER	439	439	1
YJGT-MONOMER	439	439	1
Unmodelled_DIMER_b3025	438	438	1
GNTT-MONOMER	438	438	1
SHIA-MONOMER	438	438	1
RIB5PISOMA-CPLX	438	438	1
CARBODEHYDRAT-CPLX	438	438	1
Unmodelled_MONOMER_b4470	436	436	1
Unmodelled_MONOMER_b2430	434	434	1
Unmodelled_MONOMER_b3377	434	434	1
NADH-DHII-MONOMER	434	434	1
DIHYDROPTERIREDUCT-CPLX	434	434	1
Unmodelled_MONOMER_b1609	433	433	1
Unmodelled_MONOMER_b0513	433	433	1
DCUA-MONOMER	433	433	1
Tig_mono	432	432	1
EXUT-MONOMER	432	432	1
KGTP-MONOMER	432	432	1
Unmodelled_MONOMER_b4066	430	430	1
Unmodelled_MONOMER_b1411	430	430	1
Unmodelled_MONOMER_b0486	430	430	1
SDAC-MONOMER	429	429	1
RsmB_mono	429	429	1
Unmodelled_MONOMER_b1699	429	429	1
Unmodelled_MONOMER_b2246	429	429	1
Unmodelled_MONOMER_b0043	428	428	1
THRESYN-MONOMER	428	428	1
Unmodelled_MONOMER_b3388	428	428	1
ADENYL-KIN-DIMER	428	428	1
Unmodelled_MONOMER_b4461	428	428	1
CHEZ-CPLX	428	428	1
Unmodelled_MONOMER_b0772	427	427	1
AROA-MONOMER	427	427	1
Unmodelled_MONOMER_b1543	427	427	1
Unmodelled_MONOMER_b1833	427	427	1
Unmodelled_MONOMER_b1784	427	427	1
EG11822-MONOMER	426	426	1
OROPRIBTRANS-CPLX	426	426	1
Unmodelled_MONOMER_b2535	426	426	1
G7096-MONOMER	426	426	1
Unmodelled_MONOMER_b4173	426	426	1
Unmodelled_MONOMER_b4336	426	426	1
KDOTRANS-MONOMER	425	425	1
Unmodelled_MONOMER_b2775	425	425	1
Unmodelled_MONOMER_b4465	425	425	1
Unmodelled_MONOMER_b2098	425	425	1
Unmodelled_MONOMER_b3539	423	423	1
PC00084	423	423	1
Unmodelled_MONOMER_b2766	423	423	1
Unmodelled_MONOMER_b1615	421	421	1
Unmodelled_MONOMER_b3874	421	421	1
Unmodelled_MONOMER_b1691	421	421	1
Unmodelled_MONOMER_b0821	421	421	1
Unmodelled_MONOMER_b4572	419	419	1
CODB-MONOMER	419	419	1
UDPNACETYLGLUCOSAMENOLPYRTRANS-MONOMER	419	419	1
EG11424-MONOMER	419	419	1
Unmodelled_MONOMER_b3613	419	419	1
Unmodelled_MONOMER_b1664	418	418	1
Unmodelled_MONOMER_b1001	418	418	1
Unmodelled_MONOMER_b2389	418	418	1
YNFJ-MONOMER	418	418	1
XAPB-MONOMER	418	418	1
Unmodelled_MONOMER_b4141	418	418	1
Unmodelled_MONOMER_b1596	417	417	1
LACY-MONOMER	417	417	1
Unmodelled_MONOMER_b0950	417	417	1
G7458-MONOMER	417	417	1
EG11486-MONOMER	416	416	1
YBDA-MONOMER	416	416	1
GstB_dim	416	416	1
Unmodelled_MONOMER_b2386	415	415	1
RFBX-MONOMER	415	415	1
Unmodelled_MONOMER_b3689	415	415	1
TNAB-MONOMER	415	415	1
MTR-MONOMER	414	414	1
Unmodelled_MONOMER_b0089	414	414	1
ACETOLACTSYNII-CPLX	414	414	1
Unmodelled_MONOMER_b2622	413	413	1
G6406-MONOMER	413	413	1
Unmodelled_MONOMER_b3391	412	412	1
CPLX0-3924	412	412	1
Unmodelled_MONOMER_b0135	412	412	1
Unmodelled_MONOMER_b1345	411	411	1
Unmodelled_MONOMER_b3800	411	411	1
PD04413	410	410	1
Unmodelled_MONOMER_b4337	410	410	1
Unmodelled_MONOMER_b1341	410	410	1
Unmodelled_MONOMER_b0916	410	410	1
Unmodelled_MONOMER_b2845	409	409	1
Unmodelled_MONOMER_b0130	409	409	1
Unmodelled_MONOMER_b2452	408	408	1
Unmodelled_MONOMER_b2604	408	408	1
Unmodelled_MONOMER_b1053	408	408	1
CPLX0-3821	406	406	1
Unmodelled_MONOMER_b0602	406	406	1
Unmodelled_MONOMER_b2044	406	406	1
Unmodelled_MONOMER_b0479	406	406	1
Unmodelled_MONOMER_b3473	405	405	1
Unmodelled_MONOMER_b2057	405	405	1
Unmodelled_MONOMER_b2056	405	405	1
Unmodelled_MONOMER_b4279	405	405	1
Unmodelled_DIMER_b3592	404	404	1
Unmodelled_MONOMER_b1690	404	404	1
MHPT-MONOMER	403	403	1
Unmodelled_MONOMER_b2872	403	403	1
TYRP-MONOMER	403	403	1
EG10201-MONOMER	403	403	1
Unmodelled_MONOMER_b1660	403	403	1
ADENYLYLSULFKIN-CPLX	402	402	1
Unmodelled_MONOMER_b1065	402	402	1
GST-CPLX	402	402	1
Unmodelled_MONOMER_b2442	402	402	1
Unmodelled_MONOMER_b0845	402	402	1
GLTS-MONOMER	401	401	1
Unmodelled_MONOMER_b1929	401	401	1
Unmodelled_MONOMER_b2906	400	400	1
EG10203-MONOMER	400	400	1
Unmodelled_MONOMER_b0106	400	400	1
Unmodelled_MONOMER_b2249	400	400	1
Unmodelled_MONOMER_b4257	398	398	1
Unmodelled_MONOMER_b0363	398	398	1
Unmodelled_MONOMER_b3802	398	398	1
Unmodelled_MONOMER_b1579	398	398	1
EG12455-MONOMER	397	397	1
Unmodelled_MONOMER_b3662	396	396	1
Unmodelled_MONOMER_b4271	396	396	1
Unmodelled_MONOMER_b3121	395	395	1
Unmodelled_MONOMER_b1534	395	395	1
Unmodelled_MONOMER_b0396	394	394	1
CPLX0-7913	394	394	1
Unmodelled_MONOMER_b3659	394	394	1
GrpE_dim	394	394	1
Unmodelled_MONOMER_b1791	393	393	1
HEMX-MONOMER	393	393	1
Unmodelled_MONOMER_b3364	393	393	1
B2170-MONOMER	393	393	1
CPLX0-7754	392	392	1
OCTAPRENYL-METHOXYPHENOL-OH-MONOMER	392	392	1
Unmodelled_MONOMER_b4332	392	392	1
Unmodelled_MONOMER_b2322	392	392	1
Unmodelled_MONOMER_b3442	392	392	1
CPLX0-7852	391	391	1
MANNPISOM-MONOMER	391	391	1
Unmodelled_MONOMER_b1433	391	391	1
Unmodelled_MONOMER_b3710	391	391	1
OCTAPRENYL-METHYL-METHOXY-BENZOQ-OH-MON	391	391	1
Unmodelled_MONOMER_b2981	390	390	1
Unmodelled_MONOMER_b1280	389	389	1
Unmodelled_MONOMER_b3719	389	389	1
Unmodelled_MONOMER_b1657	389	389	1
Unmodelled_MONOMER_b2737	388	388	1
RPOA-MONOMER	388	388	1
Unmodelled_MONOMER_b0537	387	387	1
Unmodelled_MONOMER_b3038	386	386	1
Unmodelled_MONOMER_b2152	385	385	1
Unmodelled_MONOMER_b0162	385	385	1
Unmodelled_MONOMER_b1047	385	385	1
Unmodelled_MONOMER_b0376	385	385	1
Unmodelled_MONOMER_b2349	385	385	1
Unmodelled_MONOMER_b0267	384	384	1
Unmodelled_MONOMER_b0095	383	383	1
Unmodelled_MONOMER_b0256	383	383	1
Unmodelled_MONOMER_b4284	383	383	1
CPLX0-7682	382	382	1
Unmodelled_MONOMER_b1505	382	382	1
Unmodelled_MONOMER_b0898	382	382	1
Unmodelled_MONOMER_b0258	381	381	1
HCAT-MONOMER	379	379	1
Unmodelled_MONOMER_b2742	379	379	1
Unmodelled_MONOMER_b3597	378	378	1
Unmodelled_MONOMER_b0705	378	378	1
Unmodelled_MONOMER_b3484	378	378	1
Unmodelled_MONOMER_b4095	378	378	1
Unmodelled_MONOMER_b3586	378	378	1
Unmodelled_MONOMER_b1460	378	378	1
Unmodelled_MONOMER_b2121	378	378	1
Unmodelled_MONOMER_b4150	377	377	1
Unmodelled_MONOMER_b1287	375	375	1
Unmodelled_MONOMER_b1943	375	375	1
Unmodelled_MONOMER_b3232	375	375	1
Rnd_mono	375	375	1
RumB_mono	375	375	1
Unmodelled_MONOMER_b3220	375	375	1
EG11339-MONOMER	374	374	1
Unmodelled_MONOMER_b3485	374	374	1
CPLX0-1581	372	372	1
Unmodelled_MONOMER_b0818	372	372	1
Unmodelled_MONOMER_b0385	371	371	1
G6437-MONOMER	371	371	1
Unmodelled_MONOMER_b1527	371	371	1
Unmodelled_MONOMER_b2394	370	370	1
Unmodelled_MONOMER_b1688	370	370	1
Unmodelled_MONOMER_b0016	370	370	1
Unmodelled_MONOMER_b0582	370	370	1
Unmodelled_MONOMER_b2113	369	369	1
Unmodelled_MONOMER_b0947	369	369	1
EG11829-MONOMER_EG11828-MONOMER	369	369	1
Unmodelled_MONOMER_b3531	368	368	1
Unmodelled_MONOMER_b3683	368	368	1
Unmodelled_MONOMER_b3250	367	367	1
GLCNACPTRANS-MONOMER	367	367	1
TrmA_mono	366	366	1
CPLX0-7668	366	366	1
CHAA-MONOMER	366	366	1
Unmodelled_MONOMER_b1650	365	365	1
Unmodelled_MONOMER_b0378	364	364	1
Unmodelled_MONOMER_b0503	364	364	1
Unmodelled_MONOMER_b4112	363	363	1
Unmodelled_MONOMER_b1203	363	363	1
Unmodelled_MONOMER_b2119	362	362	1
Unmodelled_DIMER_b0687	362	362	1
Unmodelled_MONOMER_b0315	362	362	1
Unmodelled_MONOMER_b0599	362	362	1
Unmodelled_MONOMER_b2160	362	362	1
Unmodelled_MONOMER_b0633	362	362	1
G7410-MONOMER	361	361	1
G7800-MONOMER	359	359	1
Unmodelled_MONOMER_b4377	357	357	1
Unmodelled_MONOMER_b1115	357	357	1
EG11423-MONOMER	357	357	1
Unmodelled_MONOMER_b0992	357	357	1
GRXB-MONOMER_EG12237-MONOMER	356	356	1
Unmodelled_MONOMER_b3898	356	356	1
Unmodelled_MONOMER_b3079	356	356	1
CPLX0-7684	356	356	1
CPLX0-7787	356	356	1
Unmodelled_MONOMER_b3487	355	355	1
Unmodelled_MONOMER_b2983	355	355	1
Unmodelled_MONOMER_b1020	354	354	1
Unmodelled_MONOMER_b3048	354	354	1
CPLX0-7758	354	354	1
Unmodelled_MONOMER_b2213	354	354	1
Unmodelled_MONOMER_b3690	354	354	1
Unmodelled_MONOMER_b1452	353	353	1
Unmodelled_MONOMER_b0716	353	353	1
Unmodelled_MONOMER_b1322	353	353	1
Unmodelled_MONOMER_b2699	353	353	1
Unmodelled_MONOMER_b2493	353	353	1
Unmodelled_MONOMER_b2008	352	352	1
CPLX0-7418	352	352	1
CPLX0-7939	352	352	1
Unmodelled_MONOMER_b2013	352	352	1
Unmodelled_MONOMER_b1630	352	352	1
Unmodelled_MONOMER_b2345	352	352	1
CITC-MONOMER	352	352	1
Unmodelled_MONOMER_b1315	351	351	1
Unmodelled_MONOMER_b3896	351	351	1
Unmodelled_MONOMER_b2437	350	350	1
Unmodelled_MONOMER_b1055	350	350	1
Unmodelled_MONOMER_b2194	350	350	1
Unmodelled_MONOMER_b3491	350	350	1
Unmodelled_MONOMER_b1313	350	350	1
Unmodelled_MONOMER_b3474	349	349	1
Unmodelled_MONOMER_b2158	349	349	1
Unmodelled_MONOMER_b1560	349	349	1
Unmodelled_MONOMER_b1272	349	349	1
Unmodelled_MONOMER_b1883	349	349	1
Unmodelled_MONOMER_b0715	348	348	1
Unmodelled_MONOMER_b3251	347	347	1
Unmodelled_MONOMER_b2466	347	347	1
Unmodelled_MONOMER_b3151	346	346	1
EG10669-MONOMER	346	346	1
Unmodelled_MONOMER_b0660	346	346	1
Unmodelled_MONOMER_b1762	346	346	1
G7558-MONOMER	346	346	1
DusA_mono	345	345	1
Unmodelled_MONOMER_b2753	345	345	1
Unmodelled_MONOMER_b2581	345	345	1
Unmodelled_DIMER_b1537	344	344	1
RHAT-MONOMER	344	344	1
Unmodelled_MONOMER_b3615	344	344	1
EG11341-MONOMER	344	344	1
Unmodelled_MONOMER_b2108	344	344	1
CPLX0-7679	342	342	1
Unmodelled_MONOMER_b1620	342	342	1
UDPNACETYLMURAMATEDEHYDROG-MONOMER	342	342	1
Unmodelled_MONOMER_b1368	342	342	1
Unmodelled_MONOMER_b1794	341	341	1
CPLX0-3948	340	340	1
Unmodelled_MONOMER_b3353	340	340	1
Unmodelled_MONOMER_b1097	340	340	1
EG10739-MONOMER	340	340	1
EG11352-MONOMER	339	339	1
Unmodelled_MONOMER_b4308	338	338	1
CPLX0-7853	338	338	1
EG11353-MONOMER	338	338	1
Unmodelled_MONOMER_b0868	337	337	1
Unmodelled_MONOMER_b3522	337	337	1
MHPELY-MONOMER	337	337	1
Unmodelled_MONOMER_b2516	337	337	1
DIHYDROOROTOX-MONOMER	336	336	1
PIIPROTEIN-CPLX	336	336	1
PII2-CPLX	336	336	1
CPLX0-7747	336	336	1
Unmodelled_MONOMER_b2956	335	335	1
Unmodelled_MONOMER_b2186	335	335	1
Unmodelled_MONOMER_b1678	334	334	1
Unmodelled_MONOMER_b1971	334	334	1
Unmodelled_MONOMER_b2410	332	332	1
Unmodelled_MONOMER_b2970	331	331	1
Unmodelled_MONOMER_b3158	331	331	1
6PGLUCONOLACT-MONOMER	331	331	1
Unmodelled_MONOMER_b2321	331	331	1
Unmodelled_MONOMER_b3561	331	331	1
EG11983-MONOMER	330	330	1
Unmodelled_MONOMER_b1429	330	330	1
CPLX0-2681	330	330	1
Unmodelled_MONOMER_b0877	330	330	1
CPLXECOLI-7943	330	330	1
Unmodelled_MONOMER_b3888	329	329	1
TETRAACYLDISACC4KIN-MONOMER	328	328	1
Unmodelled_MONOMER_b3087	328	328	1
Unmodelled_MONOMER_b2173	328	328	1
Unmodelled_MONOMER_b2412	328	328	1
Unmodelled_MONOMER_b1029	328	328	1
Unmodelled_MONOMER_b4295	328	328	1
KDGT-MONOMER	327	327	1
Unmodelled_MONOMER_b1428	326	326	1
Unmodelled_MONOMER_b0656	326	326	1
Unmodelled_MONOMER_b1331	326	326	1
Unmodelled_MONOMER_b0259	326	326	1
Unmodelled_MONOMER_b2030	326	326	1
Unmodelled_MONOMER_b1370	326	326	1
Unmodelled_MONOMER_b0552	326	326	1
Unmodelled_MONOMER_b3873	326	326	1
Unmodelled_MONOMER_b4711	326	326	1
Unmodelled_MONOMER_b2192	326	326	1
Unmodelled_MONOMER_b3505	326	326	1
Unmodelled_MONOMER_b2982	326	326	1
Unmodelled_MONOMER_b1994	326	326	1
Unmodelled_MONOMER_b3218	326	326	1
Unmodelled_MONOMER_b2568	324	324	1
Unmodelled_MONOMER_b3585	324	324	1
Unmodelled_MONOMER_b2271	323	323	1
YecP_mono	323	323	1
MYRISTOYLACYLTRAN-MONOMER	323	323	1
PSD-MONOMER	322	322	1
CPLX0-7923	322	322	1
G7167-MONOMER	322	322	1
Unmodelled_MONOMER_b2100	321	321	1
Unmodelled_MONOMER_b3973	321	321	1
Unmodelled_MONOMER_b3088	321	321	1
G6661-MONOMER	321	321	1
DusB_mono	321	321	1
Unmodelled_MONOMER_b4210	321	321	1
Unmodelled_MONOMER_b3184	321	321	1
Unmodelled_MONOMER_b1113	320	320	1
O-SUCCINYLBENZOATE-COA-SYN-MONOMER	320	320	1
G6275-MONOMER	320	320	1
Unmodelled_MONOMER_b3933	319	319	1
Unmodelled_MONOMER_b3614	319	319	1
Unmodelled_MONOMER_b0788	318	318	1
CPLX0-7712	318	318	1
Unmodelled_MONOMER_b3010	318	318	1
Unmodelled_MONOMER_b2623	318	318	1
Unmodelled_MONOMER_b0283	318	318	1
Unmodelled_MONOMER_b0565	317	317	1
Unmodelled_MONOMER_b0629	317	317	1
Unmodelled_MONOMER_b4292	317	317	1
MHPF-MONOMER	316	316	1
CPLX0-7928	316	316	1
Unmodelled_MONOMER_b1987	316	316	1
Fmt_mono	315	315	1
CPLX0-3921	315	315	1
DusC_mono	315	315	1
Unmodelled_MONOMER_b1522	315	315	1
Unmodelled_MONOMER_b1604	314	314	1
Unmodelled_MONOMER_b2372	314	314	1
TruB_mono	314	314	1
RIBF-MONOMER	313	313	1
B0752-MONOMER	313	313	1
Unmodelled_MONOMER_b1081	313	313	1
Unmodelled_MONOMER_b2289	312	312	1
Unmodelled_MONOMER_b4215	312	312	1
ATPF-CPLX	312	312	1
Unmodelled_MONOMER_b3118	312	312	1
EG11350-MONOMER	311	311	1
Unmodelled_MONOMER_b3060	310	310	1
Unmodelled_MONOMER_b2330	310	310	1
Unmodelled_MONOMER_b1659	310	310	1
EG12015-MONOMER	310	310	1
Unmodelled_MONOMER_b3862	310	310	1
Unmodelled_MONOMER_b2347	310	310	1
Unmodelled_MONOMER_b3243	309	309	1
Unmodelled_MONOMER_b2015	309	309	1
Unmodelled_MONOMER_b3211	309	309	1
Unmodelled_MONOMER_b0144	308	308	1
Unmodelled_MONOMER_b3013	308	308	1
CPLX0-229	308	308	1
SoxR_dim	308	308	1
Unmodelled_MONOMER_b3660	307	307	1
Unmodelled_MONOMER_b1422	307	307	1
Unmodelled_MONOMER_b1799	307	307	1
PALMITOTRANS-MONOMER	306	306	1
Unmodelled_MONOMER_b4037	306	306	1
Unmodelled_MONOMER_b1577	306	306	1
ASPCARBREG-DIMER	306	306	1
LAUROYLACYLTRAN-MONOMER	306	306	1
Unmodelled_MONOMER_b1958	305	305	1
Unmodelled_MONOMER_b0489	305	305	1
Unmodelled_MONOMER_b2808	305	305	1
CPLX0-7733	304	304	1
Unmodelled_MONOMER_b1502	304	304	1
Unmodelled_MONOMER_b0208	304	304	1
Unmodelled_MONOMER_b4357	304	304	1
Unmodelled_MONOMER_b4351	304	304	1
2-DEHYDROPANTOATE-REDUCT-MONOMER	303	303	1
Unmodelled_MONOMER_b1696	303	303	1
Unmodelled_MONOMER_b0900	302	302	1
Unmodelled_MONOMER_b1339	302	302	1
Unmodelled_MONOMER_b1384	301	301	1
Unmodelled_MONOMER_b3045	301	301	1
Unmodelled_MONOMER_b3383	301	301	1
Unmodelled_MONOMER_b0361	301	301	1
Unmodelled_MONOMER_b0020	301	301	1
Unmodelled_MONOMER_b4273	301	301	1
Unmodelled_MONOMER_b1234	301	301	1
Unmodelled_MONOMER_b1996	301	301	1
Unmodelled_MONOMER_b1402	301	301	1
Unmodelled_MONOMER_b2860	301	301	1
Unmodelled_MONOMER_b0603	300	300	1
Unmodelled_MONOMER_b0132	300	300	1
Unmodelled_MONOMER_b4573	299	299	1
Unmodelled_MONOMER_b3521	299	299	1
Unmodelled_MONOMER_b1328	299	299	1
Unmodelled_MONOMER_b0338	299	299	1
Unmodelled_MONOMER_b0824	299	299	1
Unmodelled_MONOMER_b0874	299	299	1
Unmodelled_MONOMER_b2244	299	299	1
Unmodelled_MONOMER_b2921	298	298	1
Unmodelled_MONOMER_b1409	298	298	1
Unmodelled_MONOMER_b1139	297	297	1
Unmodelled_MONOMER_b0254	297	297	1
Unmodelled_MONOMER_b3680	297	297	1
Unmodelled_MONOMER_b0567	296	296	1
Unmodelled_MONOMER_b2305	296	296	1
Unmodelled_MONOMER_b3819	296	296	1
HEMEOSYN-MONOMER	296	296	1
Unmodelled_MONOMER_b4089	296	296	1
CPLX0-7639	296	296	1
G7169-MONOMER	296	296	1
EG12134-MONOMER	295	295	1
Unmodelled_MONOMER_b0297	295	295	1
Unmodelled_MONOMER_b1741	295	295	1
CPLX0-7839	294	294	1
Unmodelled_MONOMER_b3262	294	294	1
Unmodelled_MONOMER_b2577	293	293	1
Unmodelled_MONOMER_b2157	293	293	1
EG12713-MONOMER	293	293	1
Unmodelled_MONOMER_b1526	293	293	1
EG11911-MONOMER	292	292	1
Unmodelled_MONOMER_b3411	292	292	1
Unmodelled_MONOMER_b3159	292	292	1
G6339-MONOMER	292	292	1
Unmodelled_MONOMER_b4110	292	292	1
DEHYDDEOXGALACTKIN-MONOMER	292	292	1
RluB_mono	291	291	1
Unmodelled_MONOMER_b3886	290	290	1
Unmodelled_MONOMER_b1840	290	290	1
Unmodelled_MONOMER_b2544	290	290	1
YjbC_mono	290	290	1
CPLX0-3581	290	290	1
Unmodelled_MONOMER_b2778	290	290	1
NACMURLALAAMI1-MONOMER	289	289	1
MONOMER0-341	289	289	1
Unmodelled_MONOMER_b4145	289	289	1
Unmodelled_MONOMER_b1853	289	289	1
Unmodelled_MONOMER_b2089	288	288	1
Unmodelled_MONOMER_b4379	287	287	1
Unmodelled_MONOMER_b0319	287	287	1
Unmodelled_MONOMER_b2475	287	287	1
Unmodelled_MONOMER_b0253	287	287	1
Unmodelled_MONOMER_b3644	287	287	1
Unmodelled_MONOMER_b2632	287	287	1
Unmodelled_MONOMER_b4333	286	286	1
Unmodelled_MONOMER_b2969	286	286	1
Unmodelled_DIMER_b1482	286	286	1
Unmodelled_MONOMER_b1884	286	286	1
Unmodelled_MONOMER_b2159	285	285	1
Unmodelled_MONOMER_b3618	285	285	1
Unmodelled_MONOMER_b2382	285	285	1
Unmodelled_MONOMER_b1359	285	285	1
Unmodelled_MONOMER_b0977	285	285	1
Unmodelled_MONOMER_b1644	285	285	1
G6967-MONOMER	284	284	1
Unmodelled_MONOMER_b0279	284	284	1
Unmodelled_MONOMER_b0305	284	284	1
CPLX0-3939	284	284	1
Unmodelled_MONOMER_b0111	284	284	1
Unmodelled_MONOMER_b2534	284	284	1
Unmodelled_MONOMER_b3558	283	283	1
EG11426-MONOMER	283	283	1
CPLX0-7678	282	282	1
Unmodelled_MONOMER_b3906	282	282	1
CPLX0-7756	282	282	1
Unmodelled_MONOMER_b2068	282	282	1
Unmodelled_MONOMER_b2561	282	282	1
Unmodelled_MONOMER_b2275	282	282	1
EG11600-MONOMER	281	281	1
Unmodelled_MONOMER_b3499	280	280	1
Unmodelled_MONOMER_b4480	279	279	1
Unmodelled_MONOMER_b2059	279	279	1
Unmodelled_MONOMER_b3387	278	278	1
Unmodelled_MONOMER_b1212	277	277	1
G6208-MONOMER	277	277	1
Unmodelled_MONOMER_b0346	277	277	1
Unmodelled_MONOMER_b0867	276	276	1
Unmodelled_MONOMER_b4325	276	276	1
Unmodelled_MONOMER_b3424	276	276	1
Unmodelled_MONOMER_b3032	275	275	1
MONOMER0-148	275	275	1
Unmodelled_MONOMER_b2106	274	274	1
Unmodelled_MONOMER_b4018	274	274	1
Unmodelled_MONOMER_b3570	274	274	1
THIKIN-MONOMER	274	274	1
Unmodelled_MONOMER_b2016	274	274	1
Unmodelled_MONOMER_b2360	274	274	1
DIAMINOPIMEPIM-MONOMER	274	274	1
Unmodelled_MONOMER_b2115	274	274	1
Unmodelled_MONOMER_b0193	274	274	1
Unmodelled_MONOMER_b3645	274	274	1
Unmodelled_MONOMER_b0252	273	273	1
Unmodelled_MONOMER_b1598	273	273	1
Unmodelled_MONOMER_b2332	273	273	1
KsgA_mono	273	273	1
Unmodelled_MONOMER_b2633	273	273	1
Unmodelled_MONOMER_b3661	272	272	1
G6246-MONOMER	272	272	1
Unmodelled_MONOMER_b2102	272	272	1
Unmodelled_MONOMER_b0055	271	271	1
Unmodelled_MONOMER_b0520	271	271	1
Unmodelled_MONOMER_b3830	271	271	1
Unmodelled_MONOMER_b0326	271	271	1
Unmodelled_MONOMER_b0506	271	271	1
Unmodelled_MONOMER_b1655	271	271	1
Unmodelled_MONOMER_b1669	270	270	1
GLYOXI-CPLX	270	270	1
Unmodelled_MONOMER_b3697	270	270	1
Unmodelled_MONOMER_b0164	270	270	1
Unmodelled_MONOMER_b1349	269	269	1
Unmodelled_MONOMER_b2972	269	269	1
Unmodelled_MONOMER_b1214	269	269	1
Unmodelled_MONOMER_b2847	269	269	1
Unmodelled_MONOMER_b3131	269	269	1
Unmodelled_MONOMER_b2327	269	269	1
Unmodelled_MONOMER_b2450	269	269	1
Unmodelled_MONOMER_b4303	268	268	1
Unmodelled_DIMER_b3356	268	268	1
Unmodelled_MONOMER_b0611	268	268	1
Unmodelled_MONOMER_b1749	268	268	1
Unmodelled_MONOMER_b1730	267	267	1
Unmodelled_MONOMER_b2459	267	267	1
TREHALOSEPHOSPHASYN-MONOMER	266	266	1
Unmodelled_MONOMER_b0209	266	266	1
Unmodelled_MONOMER_b1100	265	265	1
SPED-MONOMER	264	264	1
Unmodelled_MONOMER_b0482	264	264	1
Unmodelled_MONOMER_b4204	264	264	1
Unmodelled_MONOMER_b2863	264	264	1
Unmodelled_MONOMER_b2611	263	263	1
Unmodelled_MONOMER_b1152	263	263	1
Unmodelled_MONOMER_b2649	263	263	1
G7949-MONOMER	262	262	1
Unmodelled_MONOMER_b1121	262	262	1
ENOYL-ACP-REDUCT-NADH-MONOMER	262	262	1
CPLX0-7666	262	262	1
Unmodelled_MONOMER_b3884	261	261	1
Unmodelled_MONOMER_b1670	261	261	1
G7726-MONOMER	261	261	1
Unmodelled_MONOMER_b0515	261	261	1
Unmodelled_TRIMER_b0539	261	261	1
Unmodelled_MONOMER_b0217	261	261	1
Unmodelled_MONOMER_b4300	260	260	1
Unmodelled_MONOMER_b4483	260	260	1
YqcB_mono	260	260	1
Unmodelled_MONOMER_b3504	260	260	1
Unmodelled_MONOMER_b4378	259	259	1
Unmodelled_MONOMER_b3395	259	259	1
Unmodelled_MONOMER_b0491	259	259	1
DEOXYRIBOSE-P-ALD-MONOMER	259	259	1
Unmodelled_MONOMER_b0920	259	259	1
Unmodelled_MONOMER_b2739	258	258	1
Unmodelled_MONOMER_b3094	258	258	1
Unmodelled_MONOMER_b2522	258	258	1
Unmodelled_MONOMER_b2225	258	258	1
EG11167-MONOMER	257	257	1
Unmodelled_MONOMER_b2707	257	257	1
Unmodelled_MONOMER_b4324	257	257	1
Unmodelled_MONOMER_b0358	257	257	1
IscU	256	256	1
Unmodelled_MONOMER_b4364	256	256	1
Unmodelled_MONOMER_b2876	256	256	1
CPLX0-8227	255	255	1
Unmodelled_MONOMER_b2735	255	255	1
Unmodelled_MONOMER_b3214	254	254	1
PGPPHOSPHAB-MONOMER	254	254	1
Unmodelled_MONOMER_b4482	254	254	1
Unmodelled_MONOMER_b2980	254	254	1
Unmodelled_MONOMER_b0686	254	254	1
Unmodelled_MONOMER_b0065	254	254	1
Unmodelled_MONOMER_b2408	254	254	1
Unmodelled_MONOMER_b0909	254	254	1
Unmodelled_MONOMER_b2413	253	253	1
Unmodelled_MONOMER_b0706	253	253	1
HOLO-ACP-SYNTH-CPLX	252	252	1
Unmodelled_MONOMER_b1722	252	252	1
Unmodelled_MONOMER_b3423	252	252	1
Unmodelled_MONOMER_b0840	252	252	1
GPH-MONOMER	252	252	1
Unmodelled_MONOMER_b2984	252	252	1
Unmodelled_MONOMER_b1770	252	252	1
EG12438-MONOMER	252	252	1
CDPDIGLYPYPHOSPHA-MONOMER	251	251	1
GLYOXII-MONOMER	251	251	1
Unmodelled_MONOMER_b2865	251	251	1
2-OCTAPRENYL-METHOXY-BENZOQ-METH-MONOMER	251	251	1
Unmodelled_MONOMER_b2346	251	251	1
Unmodelled_MONOMER_b4191	251	251	1
Unmodelled_MONOMER_b2336	250	250	1
Unmodelled_MONOMER_b1559	250	250	1
CPLX0-3781	250	250	1
Unmodelled_MONOMER_b3497	250	250	1
Unmodelled_MONOMER_b1733	249	249	1
Unmodelled_MONOMER_b0227	249	249	1
Unmodelled_MONOMER_b1284	249	249	1
Unmodelled_MONOMER_b3047	249	249	1
Unmodelled_MONOMER_b3712	249	249	1
Unmodelled_MONOMER_b4190	249	249	1
Unmodelled_MONOMER_b1459	248	248	1
Unmodelled_MONOMER_b2055	248	248	1
Unmodelled_MONOMER_b1782	248	248	1
Unmodelled_MONOMER_b1255	247	247	1
COBS-MONOMER	247	247	1
Unmodelled_MONOMER_b3584	246	246	1
Unmodelled_MONOMER_b2922	246	246	1
Unmodelled_MONOMER_b0224	246	246	1
Unmodelled_MONOMER_b0140	246	246	1
UROGENIIISYN-MONOMER	246	246	1
UDPMANACATRANS-MONOMER	246	246	1
Unmodelled_MONOMER_b2420	244	244	1
Unmodelled_MONOMER_b2381	244	244	1
Unmodelled_MONOMER_b0276	243	243	1
Unmodelled_MONOMER_b2127	243	243	1
Unmodelled_MONOMER_b2805	243	243	1
Unmodelled_MONOMER_b1162	243	243	1
CPLX0-7417	242	242	1
Unmodelled_MONOMER_b0717	242	242	1
Unmodelled_MONOMER_b3208	242	242	1
CPLX0-7879	242	242	1
RpsB_mono	241	241	1
Unmodelled_MONOMER_b4102	241	241	1
EG12666-MONOMER	240	240	1
Unmodelled_MONOMER_b0213	240	240	1
Unmodelled_MONOMER_b3346	240	240	1
Unmodelled_MONOMER_b2110	239	239	1
Unmodelled_MONOMER_b2958	239	239	1
YggH_mono	239	239	1
Unmodelled_MONOMER_b2144	239	239	1
PNUC-MONOMER	239	239	1
FliA_mono	239	239	1
CPLX0-7720	239	239	1
Unmodelled_MONOMER_b3812	238	238	1
Unmodelled_MONOMER_b2273	238	238	1
Unmodelled_MONOMER_b3219	238	238	1
Unmodelled_MONOMER_b2555	237	237	1
Unmodelled_MONOMER_b0787	237	237	1
G7146-MONOMER	237	237	1
Unmodelled_MONOMER_b2928	237	237	1
Unmodelled_MONOMER_b2832	237	237	1
Unmodelled_MONOMER_b0011	237	237	1
Unmodelled_MONOMER_b3554	236	236	1
Unmodelled_MONOMER_b1585	236	236	1
Unmodelled_MONOMER_b0499	236	236	1
Unmodelled_MONOMER_b0192	236	236	1
Unmodelled_MONOMER_b1750	236	236	1
Unmodelled_MONOMER_b0944	236	236	1
Unmodelled_MONOMER_b0289	236	236	1
NARJ-MONOMER	236	236	1
Unmodelled_MONOMER_b1999	236	236	1
Unmodelled_MONOMER_b3810	235	235	1
Unmodelled_MONOMER_b2966	235	235	1
Unmodelled_MONOMER_b2945	235	235	1
Unmodelled_MONOMER_b0648	235	235	1
Unmodelled_MONOMER_b4048	235	235	1
Unmodelled_MONOMER_b1752	235	235	1
Unmodelled_MONOMER_b0645	235	235	1
Unmodelled_MONOMER_b0195	235	235	1
Unmodelled_MONOMER_b2858	235	235	1
Unmodelled_MONOMER_b4497	234	234	1
Unmodelled_DIMER_b0456	234	234	1
Unmodelled_MONOMER_b1138	234	234	1
CPLX0-7734	234	234	1
Unmodelled_MONOMER_b3963	234	234	1
RplA_mono	234	234	1
Unmodelled_MONOMER_b0146	234	234	1
CPLX0-8279	234	234	1
Unmodelled_MONOMER_b2634	233	233	1
Unmodelled_MONOMER_b0939	233	233	1
RpsC_mono	233	233	1
Unmodelled_MONOMER_b3595	233	233	1
Unmodelled_MONOMER_b2460	233	233	1
Unmodelled_MONOMER_b0278	232	232	1
Unmodelled_MONOMER_b4182	232	232	1
Unmodelled_MONOMER_b3548	232	232	1
Unmodelled_MONOMER_b1831	232	232	1
Unmodelled_MONOMER_b2473	232	232	1
EG11425-MONOMER	232	232	1
Unmodelled_MONOMER_b2583	232	232	1
Unmodelled_MONOMER_b3439	231	231	1
Unmodelled_MONOMER_b1632	231	231	1
NARW-MONOMER	231	231	1
Unmodelled_MONOMER_b4001	231	231	1
Unmodelled_MONOMER_b1218	231	231	1
Unmodelled_MONOMER_b2142	231	231	1
Unmodelled_MONOMER_b3143	231	231	1
G6522-MONOMER	230	230	1
YDGEF-CPLX	230	230	1
Unmodelled_MONOMER_b3086	230	230	1
Unmodelled_MONOMER_b0531	230	230	1
Unmodelled_MONOMER_b2986	230	230	1
Unmodelled_MONOMER_b0906	230	230	1
Unmodelled_MONOMER_b0399	229	229	1
Unmodelled_MONOMER_b4479	229	229	1
Unmodelled_MONOMER_b4078	229	229	1
Unmodelled_MONOMER_b1540	228	228	1
CPLX0-7617	228	228	1
Unmodelled_MONOMER_b3413	227	227	1
Unmodelled_MONOMER_b4330	227	227	1
Unmodelled_MONOMER_b0571	227	227	1
Unmodelled_MONOMER_b0620	226	226	1
Unmodelled_MONOMER_b0390	225	225	1
Unmodelled_MONOMER_b0804	225	225	1
Unmodelled_MONOMER_b1751	225	225	1
Unmodelled_MONOMER_b1145	224	224	1
Unmodelled_MONOMER_b1130	223	223	1
Unmodelled_MONOMER_b1969	223	223	1
Unmodelled_MONOMER_b0328	223	223	1
Unmodelled_MONOMER_b3037	223	223	1
Unmodelled_MONOMER_b3998	223	223	1
SdhAE-CPLX	223	223	1
Unmodelled_MONOMER_b3399	222	222	1
Unmodelled_MONOMER_b1671	222	222	1
Unmodelled_MONOMER_b1304	222	222	1
Unmodelled_MONOMER_b0310	222	222	1
Unmodelled_MONOMER_b1431	222	222	1
Unmodelled_MONOMER_b4113	222	222	1
Unmodelled_MONOMER_b3638	222	222	1
Unmodelled_MONOMER_b1137	221	221	1
Unmodelled_MONOMER_b1908	221	221	1
Unmodelled_MONOMER_b1529	221	221	1
CPLX0-801	220	220	1
CPLX0-7942	220	220	1
Unmodelled_MONOMER_b1844	220	220	1
Unmodelled_MONOMER_b0964	220	220	1
Unmodelled_MONOMER_b2664	220	220	1
Unmodelled_MONOMER_b3095	220	220	1
Unmodelled_DIMER_b3074	220	220	1
Unmodelled_MONOMER_b3552	219	219	1
Unmodelled_MONOMER_b4183	219	219	1
Unmodelled_MONOMER_b1846	219	219	1
Unmodelled_MONOMER_b2899	219	219	1
Unmodelled_MONOMER_b2317	219	219	1
Unmodelled_MONOMER_b3009	219	219	1
Unmodelled_MONOMER_b2163	219	219	1
Unmodelled_MONOMER_b2073	219	219	1
Unmodelled_MONOMER_b2734	218	218	1
Unmodelled_MONOMER_b3696	218	218	1
Unmodelled_MONOMER_b1843	218	218	1
Unmodelled_MONOMER_b1838	218	218	1
CPLX0-7816	218	218	1
YmfC_mono	217	217	1
Unmodelled_MONOMER_b2572	216	216	1
CPLX0-242	216	216	1
Unmodelled_MONOMER_b0056	216	216	1
Unmodelled_MONOMER_b2212	216	216	1
Unmodelled_MONOMER_b2293	216	216	1
Unmodelled_MONOMER_b1672	215	215	1
Unmodelled_MONOMER_b1242	215	215	1
GRXB-MONOMER	215	215	1
PGAM2-MONOMER	215	215	1
Unmodelled_MONOMER_b3508	215	215	1
Unmodelled_MONOMER_b4387	214	214	1
Unmodelled_MONOMER_b1132	213	213	1
Unmodelled_MONOMER_b2443	213	213	1
NICOTINAMID-MONOMER	213	213	1
Unmodelled_MONOMER_b1798	212	212	1
Unmodelled_MONOMER_b4185	212	212	1
Unmodelled_MONOMER_b4206	212	212	1
Unmodelled_MONOMER_b1633	211	211	1
Unmodelled_MONOMER_b3152	211	211	1
YGGA-MONOMER	211	211	1
Unmodelled_MONOMER_b3192	211	211	1
Unmodelled_MONOMER_b1972	211	211	1
THIE-MONOMER	211	211	1
Unmodelled_MONOMER_b2846	210	210	1
Unmodelled_MONOMER_b3207	210	210	1
Unmodelled_MONOMER_b0601	209	209	1
Unmodelled_MONOMER_b1154	209	209	1
RrmJ_mono	209	209	1
Unmodelled_MONOMER_b4121	209	209	1
Unmodelled_MONOMER_b3050	209	209	1
Unmodelled_MONOMER_b0959	209	209	1
RplC_mono	209	209	1
Unmodelled_MONOMER_b0277	208	208	1
CPLX0-3	208	208	1
Unmodelled_MONOMER_b1674	208	208	1
CPLX0-7649	208	208	1
Unmodelled_MONOMER_b2626	208	208	1
DISULFOXRED-MONOMER	208	208	1
Unmodelled_MONOMER_b3468	208	208	1
RsmG_mono	207	207	1
Unmodelled_MONOMER_b3071	207	207	1
Unmodelled_MONOMER_b2229	207	207	1
Unmodelled_MONOMER_b0375	207	207	1
LolB_MONOMER	207	207	1
Unmodelled_MONOMER_b3055	206	206	1
ENTD-MONOMER	206	206	1
Unmodelled_MONOMER_b1631	206	206	1
RHTB-MONOMER	206	206	1
Unmodelled_MONOMER_b1758	206	206	1
Unmodelled_MONOMER_b1267	206	206	1
Unmodelled_MONOMER_b2513	206	206	1
RHTC-MONOMER	206	206	1
TDK-MONOMER	205	205	1
EG11674-MONOMER	205	205	1
Unmodelled_MONOMER_b3944	205	205	1
G6849-MONOMER	204	204	1
Unmodelled_MONOMER_b0287	204	204	1
Unmodelled_MONOMER_b3848	204	204	1
LolA_MONOMER	203	203	1
G6622-MONOMER	203	203	1
Unmodelled_MONOMER_b3937	202	202	1
RplD_mono	201	201	1
Unmodelled_MONOMER_b3834	201	201	1
Unmodelled_MONOMER_b1408	201	201	1
Unmodelled_MONOMER_b2252	200	200	1
Unmodelled_MONOMER_b1156	200	200	1
Unmodelled_MONOMER_b1862	200	200	1
Unmodelled_MONOMER_b4312	200	200	1
Unmodelled_MONOMER_b3920	199	199	1
CPLX0-7561	199	199	1
Unmodelled_MONOMER_b4313	198	198	1
G6439-MONOMER	198	198	1
Unmodelled_MONOMER_b4076	198	198	1
Unmodelled_MONOMER_b0301	197	197	1
Unmodelled_MONOMER_b2447	197	197	1
Unmodelled_MONOMER_b3434	197	197	1
Unmodelled_MONOMER_b1545	196	196	1
EG11984-MONOMER	196	196	1
Unmodelled_MONOMER_b0012	196	196	1
Unmodelled_DIMER_b1251	196	196	1
Unmodelled_MONOMER_b0294	196	196	1
Unmodelled_MONOMER_b1728	196	196	1
Unmodelled_MONOMER_b1374	196	196	1
Unmodelled_MONOMER_b3601	195	195	1
EG12221-MONOMER	195	195	1
Unmodelled_MONOMER_b0975	195	195	1
Unmodelled_MONOMER_b3717	195	195	1
EG12445-MONOMER	195	195	1
Unmodelled_MONOMER_b2135	195	195	1
Unmodelled_MONOMER_b1066	194	194	1
Unmodelled_MONOMER_b0141	194	194	1
Unmodelled_MONOMER_b1153	194	194	1
Unmodelled_MONOMER_b0562	194	194	1
Unmodelled_MONOMER_b1806	193	193	1
Unmodelled_MONOMER_b1627	193	193	1
EG11095-MONOMER	193	193	1
G6782-MONOMER	193	193	1
PC00027	193	193	1
Unmodelled_MONOMER_b1813	192	192	1
Unmodelled_MONOMER_b1628	192	192	1
Unmodelled_MONOMER_b2136	192	192	1
Unmodelled_DIMER_b1518	192	192	1
Unmodelled_MONOMER_b0434	192	192	1
Unmodelled_MONOMER_b2909	192	192	1
Unmodelled_MONOMER_b3150	191	191	1
Unmodelled_MONOMER_b2432	191	191	1
EG11736-MONOMER	191	191	1
Unmodelled_MONOMER_b1546	191	191	1
Unmodelled_MONOMER_b1373	191	191	1
Unmodelled_MONOMER_b1742	191	191	1
Unmodelled_MONOMER_b2171	190	190	1
Unmodelled_MONOMER_b3511	190	190	1
Unmodelled_MONOMER_b0453	190	190	1
Unmodelled_MONOMER_b3363	190	190	1
Unmodelled_MONOMER_b0704	189	189	1
Unmodelled_MONOMER_b1548	189	189	1
Unmodelled_MONOMER_b0138	189	189	1
Unmodelled_DIMER_b0391	188	188	1
Unmodelled_MONOMER_b2952	188	188	1
Unmodelled_MONOMER_b2175	188	188	1
Unmodelled_MONOMER_b1057	188	188	1
Unmodelled_MONOMER_b0719	188	188	1
Unmodelled_MONOMER_b1821	188	188	1
Unmodelled_MONOMER_b4147	188	188	1
Unmodelled_MONOMER_b3506	188	188	1
Unmodelled_MONOMER_b0952	187	187	1
Unmodelled_MONOMER_b0561	187	187	1
Unmodelled_MONOMER_b1340	187	187	1
Unmodelled_MONOMER_b3549	187	187	1
Unmodelled_MONOMER_b2825	187	187	1
Unmodelled_MONOMER_b2339	187	187	1
GLUCONOKINI-MONOMER	187	187	1
Unmodelled_MONOMER_b1063	186	186	1
Unmodelled_MONOMER_b0364	185	185	1
Unmodelled_MONOMER_b2195	185	185	1
Rrf_mono	185	185	1
Unmodelled_MONOMER_b1147	185	185	1
Unmodelled_MONOMER_b1299	185	185	1
Unmodelled_MONOMER_b3472	185	185	1
EG10723-MONOMER	185	185	1
Unmodelled_MONOMER_b1158	184	184	1
Unmodelled_MONOMER_b4216	184	184	1
Unmodelled_MONOMER_b0647	184	184	1
Unmodelled_MONOMER_b2331	183	183	1
Unmodelled_MONOMER_b3090	183	183	1
G6340-MONOMER	183	183	1
EG10041-MONOMER	183	183	1
DSBBPROT-MONOMER	183	183	1
Unmodelled_MONOMER_b4234	183	183	1
BTUE-MONOMER	183	183	1
Unmodelled_MONOMER_b3043	183	183	1
Unmodelled_MONOMER_b1921	183	183	1
Unmodelled_MONOMER_b2054	182	182	1
EG11158-MONOMER	182	182	1
IPPISOM-MONOMER	182	182	1
Unmodelled_MONOMER_b0926	182	182	1
PHOSPHAGLYPSYN-MONOMER	182	182	1
Unmodelled_MONOMER_b1753	182	182	1
Unmodelled_MONOMER_b2793	181	181	1
Unmodelled_MONOMER_b4569	181	181	1
NusG_mono	181	181	1
Unmodelled_MONOMER_b0560	181	181	1
CPLX0-2021	180	180	1
Unmodelled_MONOMER_b2299	180	180	1
Unmodelled_MONOMER_b0530	180	180	1
Unmodelled_MONOMER_b2333	179	179	1
Unmodelled_MONOMER_b4315	179	179	1
RplE_mono	179	179	1
Unmodelled_MONOMER_b1110	179	179	1
Unmodelled_MONOMER_b3120	179	179	1
RpsG_mono	179	179	1
Unmodelled_MONOMER_b2506	179	179	1
Unmodelled_MONOMER_b1254	179	179	1
Unmodelled_MONOMER_b3989	179	179	1
Unmodelled_MONOMER_b0354	179	179	1
Unmodelled_MONOMER_b1726	178	178	1
Unmodelled_MONOMER_b1434	178	178	1
Unmodelled_MONOMER_b2361	178	178	1
Unmodelled_MONOMER_b1157	178	178	1
Unmodelled_MONOMER_b4059	178	178	1
Unmodelled_MONOMER_b1554	177	177	1
CPLX0-7757	176	176	1
CPLX0-7623	176	176	1
FLAVODOXIN1-MONOMER	176	176	1
Unmodelled_MONOMER_b2713	175	175	1
Unmodelled_MONOMER_b3157	174	174	1
Unmodelled_MONOMER_b2668	174	174	1
Unmodelled_MONOMER_b3557	173	173	1
FLAVODOXIN2-MONOMER	173	173	1
Unmodelled_MONOMER_b0527	173	173	1
Unmodelled_MONOMER_b1088	173	173	1
PGPPHOSPHAA-MONOMER	172	172	1
Unmodelled_MONOMER_b2505	172	172	1
Unmodelled_MONOMER_b2603	172	172	1
Unmodelled_MONOMER_b0865	171	171	1
Unmodelled_MONOMER_b0814	171	171	1
Unmodelled_MONOMER_b2335	170	170	1
Unmodelled_MONOMER_b0097	170	170	1
Unmodelled_MONOMER_b0958	169	169	1
Unmodelled_MONOMER_b0707	169	169	1
Def_mono	169	169	1
Unmodelled_MONOMER_b3068	168	168	1
Unmodelled_MONOMER_b0274	167	167	1
Unmodelled_MONOMER_b0264	167	167	1
Unmodelled_MONOMER_b3085	167	167	1
Unmodelled_MONOMER_b1503	167	167	1
Unmodelled_MONOMER_b1893	167	167	1
Unmodelled_MONOMER_b1787	167	167	1
Unmodelled_MONOMER_b0021	167	167	1
Unmodelled_MONOMER_b4256	167	167	1
Unmodelled_MONOMER_b4710	167	167	1
Unmodelled_MONOMER_b0988	167	167	1
Unmodelled_MONOMER_b3445	167	167	1
Unmodelled_MONOMER_b4484	166	166	1
Unmodelled_MONOMER_b2698	166	166	1
CPLX0-7929	166	166	1
Unmodelled_MONOMER_b2438	166	166	1
Unmodelled_MONOMER_b0228	165	165	1
Unmodelled_MONOMER_b1553	165	165	1
CHORPYRLY-MONOMER	165	165	1
G6712-MONOMER	165	165	1
Unmodelled_MONOMER_b0317	165	165	1
Unmodelled_MONOMER_b3674	165	165	1
Unmodelled_MONOMER_b2944	165	165	1
RplJ_mono	165	165	1
Unmodelled_MONOMER_b0689	164	164	1
Unmodelled_MONOMER_b0525	164	164	1
CPLX0-841	164	164	1
Unmodelled_MONOMER_b3002	164	164	1
Unmodelled_MONOMER_b2993	164	164	1
Unmodelled_MONOMER_b4360	164	164	1
Unmodelled_MONOMER_b1036	163	163	1
Unmodelled_MONOMER_b2851	163	163	1
Unmodelled_MONOMER_b3249	162	162	1
Unmodelled_MONOMER_b1877	162	162	1
Unmodelled_MONOMER_b0858	162	162	1
Unmodelled_MONOMER_b2058	162	162	1
Unmodelled_MONOMER_b1353	162	162	1
Unmodelled_MONOMER_b2313	162	162	1
Unmodelled_MONOMER_b2992	162	162	1
Unmodelled_MONOMER_b3808	161	161	1
Unmodelled_MONOMER_b3682	161	161	1
Unmodelled_MONOMER_b2605	160	160	1
Unmodelled_MONOMER_b2650	160	160	1
Unmodelled_MONOMER_b2848	160	160	1
Unmodelled_MONOMER_b0643	160	160	1
Unmodelled_MONOMER_b2644	160	160	1
Unmodelled_MONOMER_b1457	160	160	1
H2PTERIDINEPYROPHOSPHOKIN-MONOMER	159	159	1
Unmodelled_MONOMER_b1932	159	159	1
Unmodelled_MONOMER_b2570	159	159	1
Unmodelled_MONOMER_b4586	159	159	1
DIHYDROFOLATEREDUCT-MONOMER	159	159	1
Unmodelled_MONOMER_b0247	158	158	1
Unmodelled_MONOMER_b4140	158	158	1
Unmodelled_MONOMER_b2619	158	158	1
Unmodelled_MONOMER_b2854	158	158	1
Unmodelled_MONOMER_b4397	157	157	1
Unmodelled_MONOMER_b2009	157	157	1
Unmodelled_MONOMER_b3284	157	157	1
Unmodelled_MONOMER_b3573	157	157	1
Unmodelled_MONOMER_b4363	157	157	1
Unmodelled_MONOMER_b1151	157	157	1
Unmodelled_MONOMER_b2826	156	156	1
Unmodelled_MONOMER_b2124	156	156	1
Unmodelled_MONOMER_b2717	156	156	1
Unmodelled_MONOMER_b0458	156	156	1
Unmodelled_MONOMER_b0250	155	155	1
Unmodelled_MONOMER_b3716	155	155	1
Unmodelled_MONOMER_b0214	155	155	1
Unmodelled_MONOMER_b0659	155	155	1
Unmodelled_MONOMER_b2637	155	155	1
Unmodelled_MONOMER_b1944	154	154	1
Unmodelled_MONOMER_b1708	154	154	1
Unmodelled_MONOMER_b3221	154	154	1
Unmodelled_MONOMER_b2123	153	153	1
G6580-MONOMER	153	153	1
Unmodelled_MONOMER_b1122	153	153	1
Unmodelled_MONOMER_b0556	153	153	1
Unmodelled_MONOMER_b2725	153	153	1
Unmodelled_MONOMER_b4329	153	153	1
Unmodelled_MONOMER_b1181	153	153	1
Unmodelled_MONOMER_b3596	153	153	1
Unmodelled_MONOMER_b2071	153	153	1
Unmodelled_MONOMER_b0081	152	152	1
Unmodelled_MONOMER_b0488	152	152	1
Unmodelled_MONOMER_b0387	152	152	1
Unmodelled_MONOMER_b1820	152	152	1
Unmodelled_MONOMER_b1041	151	151	1
Unmodelled_MONOMER_b1042	151	151	1
Unmodelled_MONOMER_b0547	151	151	1
Unmodelled_MONOMER_b2295	151	151	1
Unmodelled_MONOMER_b4252	150	150	1
Unmodelled_DIMER_b2187	150	150	1
Unmodelled_MONOMER_b3170	150	150	1
Unmodelled_MONOMER_b3663	150	150	1
EG11598-MONOMER	150	150	1
Unmodelled_MONOMER_b2433	149	149	1
Unmodelled_MONOMER_b3677	149	149	1
Unmodelled_MONOMER_b2790	149	149	1
Unmodelled_MONOMER_b0413	149	149	1
Unmodelled_MONOMER_b0028	149	149	1
Unmodelled_MONOMER_b2665	149	149	1
Unmodelled_MONOMER_b2670	149	149	1
Unmodelled_MONOMER_b4373	148	148	1
Unmodelled_MONOMER_b2002	148	148	1
Unmodelled_MONOMER_b0961	148	148	1
Unmodelled_MONOMER_b2850	148	148	1
Unmodelled_MONOMER_b1789	148	148	1
Unmodelled_MONOMER_b4012	147	147	1
Unmodelled_MONOMER_b3154	147	147	1
Unmodelled_MONOMER_b0251	147	147	1
Unmodelled_MONOMER_b2636	147	147	1
Unmodelled_MONOMER_b2061	147	147	1
Unmodelled_MONOMER_b3742	147	147	1
Unmodelled_MONOMER_b3393	146	146	1
Unmodelled_MONOMER_b1626	146	146	1
Unmodelled_MONOMER_b0280	146	146	1
Unmodelled_MONOMER_b3921	146	146	1
Unmodelled_MONOMER_b0108	146	146	1
Unmodelled_MONOMER_b2354	146	146	1
Unmodelled_MONOMER_b1196	146	146	1
Unmodelled_MONOMER_b3448	146	146	1
Unmodelled_MONOMER_b3562	145	145	1
RplO_mono	144	144	1
Unmodelled_MONOMER_b4093	144	144	1
Unmodelled_MONOMER_b3611	143	143	1
Unmodelled_MONOMER_b3686	142	142	1
Unmodelled_MONOMER_b2689	142	142	1
RplM_mono	142	142	1
G7164-MONOMER	141	141	1
Unmodelled_MONOMER_b4002	141	141	1
Unmodelled_MONOMER_b2849	141	141	1
Unmodelled_MONOMER_b2859	141	141	1
Unmodelled_MONOMER_b2543	140	140	1
Unmodelled_MONOMER_b1358	140	140	1
Unmodelled_MONOMER_b3033	140	140	1
Unmodelled_MONOMER_b2274	140	140	1
Unmodelled_MONOMER_b1379	140	140	1
Unmodelled_MONOMER_b3322	139	139	1
NusB_mono	139	139	1
RED-THIOREDOXIN2-MONOMER	139	139	1
Unmodelled_MONOMER_b2949	138	138	1
Unmodelled_MONOMER_b4255	138	138	1
Unmodelled_MONOMER_b2446	138	138	1
EG12394-MONOMER	137	137	1
Unmodelled_MONOMER_b1155	137	137	1
Unmodelled_MONOMER_b0965	137	137	1
Unmodelled_MONOMER_b4286	137	137	1
Unmodelled_MONOMER_b1928	137	137	1
Unmodelled_MONOMER_b1237	137	137	1
Unmodelled_MONOMER_b0791	136	136	1
Unmodelled_MONOMER_b2718	136	136	1
RplP_mono	136	136	1
Unmodelled_MONOMER_b2971	136	136	1
Unmodelled_MONOMER_b1549	136	136	1
Unmodelled_MONOMER_b4030	136	136	1
Unmodelled_MONOMER_b2824	135	135	1
RpsF_mono	135	135	1
Unmodelled_MONOMER_b1570	135	135	1
G6954-MONOMER	135	135	1
Unmodelled_MONOMER_b3392	134	134	1
Unmodelled_MONOMER_b3099	134	134	1
Unmodelled_MONOMER_b0196	134	134	1
Unmodelled_MONOMER_b2977	134	134	1
Unmodelled_MONOMER_b0013	134	134	1
Unmodelled_MONOMER_b2669	134	134	1
Unmodelled_MONOMER_b1161	134	134	1
Unmodelled_MONOMER_b3400	133	133	1
Unmodelled_MONOMER_b0240	133	133	1
Unmodelled_MONOMER_b4181	133	133	1
RbfA_mono	133	133	1
Unmodelled_MONOMER_b1178	133	133	1
Unmodelled_MONOMER_b0233	132	132	1
Unmodelled_MONOMER_b2141	132	132	1
Unmodelled_MONOMER_b3233	132	132	1
Unmodelled_MONOMER_b4184	132	132	1
Unmodelled_MONOMER_b0976	132	132	1
Unmodelled_MONOMER_b2807	131	131	1
Unmodelled_MONOMER_b3148	131	131	1
Unmodelled_MONOMER_b1878	130	130	1
Unmodelled_MONOMER_b1213	130	130	1
RpsH_mono	130	130	1
Unmodelled_MONOMER_b4326	130	130	1
Unmodelled_MONOMER_b2449	130	130	1
Unmodelled_MONOMER_b3101	130	130	1
Unmodelled_MONOMER_b3024	130	130	1
RpsK_mono	129	129	1
EG10626-MONOMER	129	129	1
Unmodelled_MONOMER_b1039	129	129	1
Unmodelled_MONOMER_b0454	129	129	1
Unmodelled_MONOMER_b0163	128	128	1
YheN_mono	128	128	1
Unmodelled_MONOMER_b4011	127	127	1
Unmodelled_MONOMER_b3096	127	127	1
Unmodelled_MONOMER_b4075	127	127	1
Unmodelled_MONOMER_b3483	127	127	1
Unmodelled_MONOMER_b1531	127	127	1
RplQ_mono	127	127	1
Unmodelled_MONOMER_b0836	127	127	1
MONOMER0-1842	126	126	1
Unmodelled_MONOMER_b3817	126	126	1
Unmodelled_MONOMER_b3818	126	126	1
Unmodelled_MONOMER_b0753	126	126	1
Unmodelled_MONOMER_b1104	125	125	1
Unmodelled_MONOMER_b0468	125	125	1
Unmodelled_MONOMER_b2448	125	125	1
Unmodelled_MONOMER_b0848	125	125	1
Unmodelled_MONOMER_b2419	124	124	1
Unmodelled_MONOMER_b1841	124	124	1
Unmodelled_MONOMER_b2005	124	124	1
Unmodelled_MONOMER_b1051	124	124	1
Unmodelled_MONOMER_b0442	123	123	1
RplN_mono	123	123	1
Unmodelled_MONOMER_b3097	122	122	1
Unmodelled_MONOMER_b0498	122	122	1
CPLX0-7956	122	122	1
Unmodelled_MONOMER_b3293	122	122	1
Unmodelled_MONOMER_b0579	122	122	1
Unmodelled_MONOMER_b2358	122	122	1
Unmodelled_MONOMER_b1177	122	122	1
[truncated: 1,986 more rows]
