# Supplementary material for: Establishing comprehensive quaternary structural proteomes from genome sequence
Source: Research Square preprint supplement (doi:10.21203/rs.3.rs-2923626/v1), 2023-05-19
Supplement: Supplementary file 2 [file 4def0fa43285810850989999.xlsx]

## Sheet: Description
		Dataset S6
		This dataset contains the orientation information and method for 1,093 proteins with viable membranes calculated in the membrane module. We note that a small fraction of the proteins in this dataset are annotated to the periplasm and cytoplasm. These proteins had no annotated evidence of membrane integration, and thus were identified by manual inspection to have been incorrectly assigned viable m…

## Sheet: DatasetS6-MembraneOrientationOf
StructureId	Protein Location	Membrane_Orientation	sourceOfMemData	orientBy	UniprotMemQCQA	tmhmmMemQCQA
5nik-assembly1	TransMembrane	{'Periplasmic_C': 'Periplasmic_C', 'Cytoplasmic': 'Cytoplasmic', 'Extracellular': 'Extracellular', 'Periplasmic_E': 'Periplasmic_E'}	Uniprot	Uniprot_Passed	Pass	Pass
5v5s-assembly1	TransMembrane	{'Periplasmic_C': 'Periplasmic_C', 'Cytoplasmic': 'Cytoplasmic', 'Extracellular': 'Extracellular', 'Periplasmic_E': 'Periplasmic_E'}	Uniprot	Uniprot_Passed	Pass
6erj-assembly2	Periplasm	{}	OPM	Manually
PTRA_ECOLI_model1_clean_residues_removed	Periplasm	{}	OPM	Manually
OPGG_ECOLI_model1_clean_residues_removed	Periplasm	{}	OPM	Manually
2y4f-assembly1	Periplasm	{}	OPM	Manually
YCGI_ECOLI_model1_clean_residues_removed	Periplasm	{}	OPM	Manually
2uvk-assembly1	Periplasm	{}	OPM	Manually
1s7d-assembly2	Periplasm	{}	OPM	Manually
3zhc-assembly1	Periplasm	{}	OPM	Manually
DACD_ECOLI_model1_clean_residues_removed	Periplasm	{}	OPM	Manually
3bdh-assembly1	Periplasm	{}	OPM	Manually
1rmt-assembly1	Periplasm	{}	OPM	Manually
AF-P76206-F1-model_v2	Outer_Membrane	{u'O': u'Extracellular', u'N': u'Periplasmic_E'}	OPM	Manually
AF-P45508-F1-model_v2	Outer_Membrane	{u'O': u'Periplasmic_E', u'N': u'Extracellular'}	OPM	Manually
YHJY_ECOLI_model1_clean_residues_removed	Outer_Membrane	{u'O': u'Periplasmic_E', u'N': u'Extracellular'}	OPM	Manually
P77211_18_454_3pik	Outer_Membrane	{u'O': u'Extracellular', u'N': u'Periplasmic_E'}	OPM	Manually
AF-P37018-F1-model_v2	Outer_Membrane	{u'O': u'Extracellular', u'N': u'Periplasmic_E'}	OPM	Manually
AF-P0ADM4-F1-model_v2	Outer_Membrane	{u'O': u'Periplasmic_E', u'N': u'Extracellular'}	OPM	Manually
P33341_25_826_6e14	Outer_Membrane	{u'O': u'Extracellular', u'N': u'Periplasmic_E'}	OPM	Manually
P0A927_31_294_1tlw	Outer_Membrane	{u'O': u'Extracellular', u'N': u'Periplasmic_E'}	OPM	Manually
AF-P77802-F1-model_v2	Outer_Membrane	{u'O': u'Extracellular', u'N': u'Periplasmic_E'}	OPM	Manually
6zhv-assembly1	Outer_Membrane	{'O': 'Extracellular', 'N': 'Periplasmic_E'}	OPM	Uniprot_Passed	Pass
2j1n-assembly1	Outer_Membrane	{'O': 'Extracellular', 'N': 'Periplasmic_E'}	OPM	Uniprot_Passed	Pass
AF-P0A921-F1-model_v2	Outer_Membrane	{'O': 'Periplasmic_E', 'N': 'Extracellular'}	OPM	Uniprot_Passed	Pass
CPLX0-7628_AlphaMulti	Outer_Membrane	{u'O': u'Periplasmic_E', u'N': u'Extracellular'}	OPM	Manually
2mhl-assembly1	Outer_Membrane	{u'O': u'Extracellular', u'N': u'Periplasmic_E'}	OPM	Manually
AF-P37650-F1-model_v2	Outer_Membrane	{u'O': u'Extracellular', u'N': u'Periplasmic_E'}	OPM	Manually
CPLX0-7976_AlphaMulti	Outer_Membrane	{'O': 'Extracellular', 'N': 'Periplasmic_E'}	OPM	Uniprot_Passed	Pass
BamAD-CPLX_AlphaMulti	Outer_Membrane	{'O': 'Extracellular', 'N': 'Periplasmic_E'}	OPM	Uniprot_Passed	Pass
7ojg-assembly1	Outer_Membrane	{u'O': u'Extracellular', u'N': u'Periplasmic_E'}	OPM	Manually
P69856_25_238_2wjr	Outer_Membrane	{'O': 'Extracellular', 'N': 'Periplasmic_E'}	OPM	Uniprot_Passed	Pass
AF-P26218-F1-model_v2	Outer_Membrane	{u'O': u'Periplasmic_E', u'N': u'Extracellular'}	OPM	Manually
P17315_31_663_2hdi	Outer_Membrane	{u'O': u'Extracellular', u'N': u'Periplasmic_E'}	OPM	Manually
AF-P75906-F1-model_v2	Outer_Membrane	{u'O': u'Periplasmic_E', u'N': u'Extracellular'}	OPM	Manually
P05825_33_746_1fep	Outer_Membrane	{u'O': u'Extracellular', u'N': u'Periplasmic_E'}	OPM	Manually
P42915_43_838_6e14	Outer_Membrane	{u'O': u'Extracellular', u'N': u'Periplasmic_E'}	OPM	Manually
AF-P06971-F1-model_v2	Outer_Membrane	{'O': 'Extracellular', 'N': 'Periplasmic_E'}	OPM	Uniprot_Passed	Pass
AF-P33129-F1-model_v2	Outer_Membrane	{u'O': u'Extracellular', u'N': u'Periplasmic_E'}	OPM	Manually
AF-P13036-F1-model_v2	Outer_Membrane	{u'O': u'Extracellular', u'N': u'Periplasmic_E'}	OPM	Manually
NmPC-CPLX_AlphaMulti	Outer_Membrane	{u'O': u'Extracellular', u'N': u'Periplasmic_E'}	OPM	Manually
6e14-assembly1	Outer_Membrane	{u'O': u'Periplasmic_E', u'N': u'Extracellular'}	OPM	Manually
P10384_26_446_2r4n	Outer_Membrane	{u'O': u'Periplasmic_E', u'N': u'Extracellular'}	OPM	Manually
P02930_23_458_5bun	Outer_Membrane	{'O': 'Extracellular', 'N': 'Periplasmic_E'}	OPM	Uniprot_Passed	Pass
P31827_29_790_6ofr	Outer_Membrane	{u'O': u'Extracellular', u'N': u'Periplasmic_E'}	OPM	Manually
AF-P52143-F1-model_v2	Outer_Membrane	{u'O': u'Periplasmic_E', u'N': u'Extracellular'}	OPM	Manually
AF-P77199-F1-model_v2	Outer_Membrane	{u'O': u'Periplasmic_E', u'N': u'Extracellular'}	OPM	Manually
AF-P31600-F1-model_v2	Outer_Membrane	{u'O': u'Extracellular', u'N': u'Periplasmic_E'}	OPM	Manually
AF-P0AB31-F1-model_v2	Outer_Membrane	{u'O': u'Periplasmic_E', u'N': u'Extracellular'}	OPM	Manually
7vtz-assembly1	Outer_Membrane	{u'O': u'Extracellular', u'N': u'Periplasmic_E'}	OPM	Manually
AF-P32689-F1-model_v2	Outer_Membrane	{u'O': u'Extracellular', u'N': u'Periplasmic_E'}	OPM	Manually
yddL_CPLX_AlphaMulti	Outer_Membrane	{u'O': u'Extracellular', u'N': u'Periplasmic_E'}	OPM	Manually
OMPT_ECOLI_model1_clean_residues_removed	Outer_Membrane	{'O': 'Extracellular', 'N': 'Periplasmic_E'}	OPM	Uniprot_Passed	Pass
AF-P39180-F1-model_v2	Outer_Membrane	{u'O': u'Periplasmic_E', u'N': u'Extracellular'}	OPM	Manually
1af6-assembly1	Outer_Membrane	{'O': 'Extracellular', 'N': 'Periplasmic_E'}	OPM	Uniprot_Passed	Pass
AF-P37681-F1-model_v2	Outer_Membrane	{u'O': u'Periplasmic_E', u'N': u'Extracellular'}	OPM	Manually
AF-P69434-F1-model_v2	Outer_Membrane	{u'O': u'Extracellular', u'N': u'Periplasmic_E'}	OPM	Manually
AF-P76501-F1-model_v2	Outer_Membrane	{u'O': u'Extracellular', u'N': u'Periplasmic_E'}	OPM	Manually
P75780_50_760_6bpm	Outer_Membrane	{u'O': u'Extracellular', u'N': u'Periplasmic_E'}	OPM	Manually
P75750_22_815_6e14	Outer_Membrane	{u'O': u'Extracellular', u'N': u'Periplasmic_E'}	OPM	Manually
AF-Q47706-F1-model_v2	Outer_Membrane	{u'O': u'Periplasmic_E', u'N': u'Extracellular'}	OPM	Manually
AF-P33924-F1-model_v2	Outer_Membrane	{u'O': u'Periplasmic_E', u'N': u'Extracellular'}	OPM	Manually
AF-P45420-F1-model_v2	Outer_Membrane	{u'O': u'Extracellular', u'N': u'Periplasmic_E'}	OPM	Manually
CPLX0-1581_AlphaMulti	Outer_Membrane	{u'O': u'OM_1', u'N': u'OM_2'}	OPM	Manually
AF-Q2MB16-F1-model_v2	Outer_Membrane	{u'O': u'Extracellular', u'N': u'Periplasmic_E'}	OPM	Manually
AF-P75820-F1-model_v2	Outer_Membrane	{u'O': u'Periplasmic_E', u'N': u'Extracellular'}	OPM	Manually
OmpN_tri_AlphaMulti	Outer_Membrane	{u'O': u'Extracellular', u'N': u'Periplasmic_E'}	OPM	Manually
P76773_22_230_2wjq	Outer_Membrane	{u'O': u'Extracellular', u'N': u'Periplasmic_E'}	OPM	Manually
AF-P76297-F1-model_v2	Outer_Membrane	{u'O': u'Extracellular', u'N': u'Periplasmic_E'}	OPM	Manually
AF-P37645-F1-model_v2	Outer_Membrane	{u'O': u'Extracellular', u'N': u'Periplasmic_E'}	OPM	Manually
P76137_1_382_6e14	Outer_Membrane	{u'O': u'Periplasmic_E', u'N': u'Extracellular'}	OPM	Manually
CPLX0-7944_AlphaMulti	Outer_Membrane	{'O': 'Periplasmic_E', 'N': 'Extracellular'}	OPM	Uniprot_Passed	Pass
P0A932_22_376_2j58	Outer_Membrane	{u'O': u'Extracellular', u'N': u'Periplasmic_E'}	OPM	Manually
AF-Q47534-F1-model_v2	Outer_Membrane	{u'O': u'Periplasmic_E', u'N': u'Extracellular'}	OPM	Manually
P76655_21_820_6cd2	Outer_Membrane	{u'O': u'Extracellular', u'N': u'Periplasmic_E'}	OPM	Manually
P77468_37_862_6e14	Outer_Membrane	{u'O': u'Extracellular', u'N': u'Periplasmic_E'}	OPM	Manually
P06129_25_614_2gsk	Outer_Membrane	{'O': 'Extracellular', 'N': 'Periplasmic_E'}	OPM	Uniprot_Failed	Exists
P75857_37_866_6e14	Outer_Membrane	{u'O': u'Extracellular', u'N': u'Periplasmic_E'}	OPM	Manually
AF-P0AGC5-F1-model_v2	Outer_Membrane	{u'O': u'Periplasmic_E', u'N': u'Extracellular'}	OPM	Manually
P02932_22_351_1pho	Outer_Membrane	{u'O': u'Extracellular', u'N': u'Periplasmic_E'}	OPM	Manually
AF-P16869-F1-model_v2	Outer_Membrane	{u'O': u'Periplasmic_E', u'N': u'Extracellular'}	OPM	Manually
P76045_22_301_5mwv	Outer_Membrane	{'TM_1': 'Extracellular', 'TM_2': 'Periplasmic_E'}	Uniprot		Pass
AF-P46474-F1-model_v2	Outer_Membrane	{u'O': u'Extracellular', u'N': u'Periplasmic_E'}	OPM	Manually
AF-P45564-F1-model_v2	Outer_Membrane	{u'O': u'Periplasmic_E', u'N': u'Extracellular'}	OPM	Manually
AF-P0A910-F1-model_v2	Outer_Membrane	{'O': 'Periplasmic_E', 'N': 'Extracellular'}	OPM	Uniprot_Passed	Pass
AF-P76115-F1-model_v2	Outer_Membrane	{u'O': u'Extracellular', u'N': u'Periplasmic_E'}	OPM	Manually
AF-P0A908-F1-model_v2	Outer_Membrane	{u'O': u'Periplasmic_E', u'N': u'Extracellular'}	OPM	Manually
P0A930_22_378_2j58	Outer_Membrane	{u'O': u'Extracellular', u'N': u'Periplasmic_E'}	OPM	Manually
AF-P28224-F1-model_v2	Outer_Membrane	{u'O': u'Periplasmic_E', u'N': u'Extracellular'}	OPM	Manually
b4080_3__AlphaMulti	Outer_Membrane	{u'O': u'Periplasmic_E', u'N': u'Extracellular'}	OPM	Manually
AF-P76017-F1-model_v2	Outer_Membrane	{u'O': u'Periplasmic_E', u'N': u'Extracellular'}	OPM	Manually
CPLX0-3933_AlphaMulti	Outer_Membrane	{'O': 'Extracellular', 'N': 'Periplasmic_E'}	OPM	Uniprot_Passed	Pass
AF-P37651-F1-model_v2	Outer_Membrane	{u'O': u'Extracellular', u'N': u'Periplasmic_E'}	OPM	Manually
AF-P75882-F1-model_v2	Outer_Membrane	{u'O': u'Extracellular', u'N': u'Periplasmic_E'}	OPM	Manually
OMPX_ECOLI_model1_clean_residues_removed	Outer_Membrane	{'O': 'Extracellular', 'N': 'Periplasmic_E'}	OPM	Uniprot_Passed	Pass
MDTQ_ECOLI_model1_clean_residues_removed	Outer Membrane (No Area)	{}	OPM
AF-P30149-F1-model_v2	Inner_Membrane	{'O': 'Cytoplasmic', 'N': 'Periplasmic_C'}	OPM	Uniprot_Failed	Exists	Exists
AF-P0AG14-F1-model_v2	Inner_Membrane	{'O': 'Cytoplasmic', 'N': 'Periplasmic_C'}	OPM	Uniprot_Failed
AF-P76352-F1-model_v2	Inner_Membrane	{u'O': u'Periplasmic_C', u'N': u'Cytoplasmic'}	OPM	Manually	Exists	Pass
P24181_1_1031_3w9i	Inner_Membrane	{u'O': u'Periplasmic_C', u'N': u'Cytoplasmic'}	OPM	Manually
AF-P0AD27-F1-model_v2	Inner_Membrane	{'O': 'Periplasmic_C', 'N': 'Cytoplasmic'}	OPM	Uniprot_Failed	Exists	Exists
AF-P75685-F1-model_v2	Inner_Membrane	{'O': 'Periplasmic_C', 'N': 'Cytoplasmic'}	OPM	Uniprot_Passed	Pass	Pass
FSR_ECOLI_model1_clean_residues_removed	Inner_Membrane	{'O': 'Periplasmic_C', 'N': 'Cytoplasmic'}	OPM	Uniprot_Passed	Pass	Pass
UIDB_ECOLI_model1_clean_residues_removed	Inner_Membrane	{'O': 'Periplasmic_C', 'N': 'Cytoplasmic'}	OPM	Uniprot_Passed	Pass	Pass
7cge-assembly1	Inner_Membrane	{'O': 'Periplasmic_C', 'N': 'Cytoplasmic'}	OPM	Uniprot_Passed	Pass	Pass
AF-P42590-F1-model_v2	Inner_Membrane	{'O': 'Periplasmic_C', 'N': 'Cytoplasmic'}	OPM	Uniprot_Failed	Exists	Pass
AF-P38097-F1-model_v2	Inner_Membrane	{u'O': u'Periplasmic_C', u'N': u'Cytoplasmic'}	OPM	Manually	Exists	Pass
AF-P64471-F1-model_v2	Inner_Membrane	{u'O': u'IM_1', u'N': u'IM_2'}	OPM	Manually
AF-C1P5Z8-F1-model_v2	Inner_Membrane	{'O': 'Periplasmic_C', 'N': 'Cytoplasmic'}	OPM	Uniprot_Failed
AF-P08369-F1-model_v2	Inner_Membrane	{'O': 'Periplasmic_C', 'N': 'Cytoplasmic'}	OPM	Uniprot_Failed	Exists	Pass
AF-P46133-F1-model_v2	Inner_Membrane	{u'O': u'IM_1', u'N': u'IM_2'}	OPM	Manually	Exists	Exists
P76111_11_146_6oh2	Inner_Membrane	{'O': 'Periplasmic_C', 'N': 'Cytoplasmic'}	OPM	Uniprot_Failed	Exists	Pass
P0AF16_4_507_6cc4	Inner_Membrane	{'O': 'Periplasmic_C', 'N': 'Cytoplasmic'}	OPM	Uniprot_Passed	Pass	Pass
AF-P0CB62-F1-model_v2	Inner_Membrane	{u'O': u'IM_1', u'N': u'IM_2'}	OPM	Manually
FORMHYDROGI-CPLX_AlphaMulti	Inner_Membrane	{'O': 'Periplasmic_C', 'N': 'Cytoplasmic'}	OPM	Uniprot_Passed	Pass	Exists
AF-P16926-F1-model_v2	Inner_Membrane	{'O': 'Periplasmic_C', 'N': 'Cytoplasmic'}	OPM	Uniprot_Failed
AF-G3MTW7-F1-model_v2	Inner_Membrane	{u'O': u'IM_1', u'N': u'IM_2'}	OPM	Manually
b3241_6__AlphaMulti	Inner_Membrane	{u'O': u'Periplasmic_C', u'N': u'Cytoplasmic'}	OPM	Manually	Pass	Pass
AF-P67444-F1-model_v2	Inner_Membrane	{'O': 'Periplasmic_C', 'N': 'Cytoplasmic'}	OPM	Uniprot_Failed	Exists	Pass
AF-P60872-F1-model_v2	Inner_Membrane	{u'O': u'Periplasmic_C', u'N': u'Cytoplasmic'}	OPM	Manually	Pass	Pass
AF-P39284-F1-model_v2	Inner_Membrane	{'O': 'Cytoplasmic', 'N': 'Periplasmic_C'}	OPM	Uniprot_Passed	Pass	Pass
AF-P0A7C8-F1-model_v2	Inner_Membrane	{'O': 'Periplasmic_C', 'N': 'Cytoplasmic'}	OPM	Uniprot_Failed	Exists	Exists
AF-P37643-F1-model_v2	Inner_Membrane	{'O': 'Periplasmic_C', 'N': 'Cytoplasmic'}	OPM	Uniprot_Passed	Pass	Pass
AF-P39355-F1-model_v2	Inner_Membrane	{u'O': u'IM_1', u'N': u'IM_2'}	OPM	Manually
AF-P0AFA7-F1-model_v2	Inner_Membrane	{u'O': u'IM_1', u'N': u'IM_2'}	OPM	Manually	Pass	Pass
AF-P76249-F1-model_v2	Inner_Membrane	{u'O': u'IM_1', u'N': u'IM_2'}	OPM	Manually	Pass	Pass
AF-P23857-F1-model_v2	Inner_Membrane	{u'O': u'Periplasmic_C', u'N': u'Cytoplasmic'}	OPM	Manually
AF-P75785-F1-model_v2	Inner_Membrane	{'O': 'Periplasmic_C', 'N': 'Cytoplasmic'}	OPM	Uniprot_Failed	Exists	Pass
P0AC26_1_250_4fc4	Inner_Membrane	{'O': 'Periplasmic_C', 'N': 'Cytoplasmic'}	OPM	Uniprot_Passed	Pass	Pass
AF-P64506-F1-model_v2	Inner_Membrane	{u'O': u'Periplasmic_C', u'N': u'Cytoplasmic'}	OPM	Manually
AF-P0AB58-F1-model_v2	Inner_Membrane	{'O': 'Cytoplasmic', 'N': 'Periplasmic_C'}	OPM	Uniprot_Failed
AF-P77804-F1-model_v2	Inner_Membrane	{u'O': u'Periplasmic_C', u'N': u'Cytoplasmic'}	OPM	Manually
P0AEP1_14_453_4zw9	Inner_Membrane	{'O': 'Periplasmic_C', 'N': 'Cytoplasmic'}	OPM	Uniprot_Passed	Pass	Pass
AF-Q47689-F1-model_v2	Inner_Membrane	{u'O': u'IM_1', u'N': u'IM_2'}	OPM	Manually	Pass	Pass
AF-P0ABF8-F1-model_v2	Inner_Membrane	{'O': 'Cytoplasmic', 'N': 'Periplasmic_C'}	OPM	Uniprot_Failed	Exists	Pass
P0AAG5_8_576_6o30	Inner_Membrane	{'O': 'Periplasmic_C', 'N': 'Cytoplasmic'}	OPM	Uniprot_Passed	Pass	Exists
AF-P41441-F1-model_v2	Inner_Membrane	{'O': 'Periplasmic_C', 'N': 'Cytoplasmic'}	OPM	Uniprot_Passed	Pass	Pass
NARX-CPLX_AlphaMulti	Inner_Membrane	{'O': 'Periplasmic_C', 'N': 'Cytoplasmic'}	OPM	Uniprot_Passed	Pass	Pass
AF-P0DPO8-F1-model_v2	Inner_Membrane	{u'O': u'IM_1', u'N': u'IM_2'}	OPM	Manually
AF-P45570-F1-model_v2	Inner_Membrane	{'O': 'Cytoplasmic', 'N': 'Periplasmic_C'}	OPM	Uniprot_Failed	Exists	Exists
AF-P45546-F1-model_v2	Inner_Membrane	{u'O': u'IM_1', u'N': u'IM_2'}	OPM	Manually	Exists	Pass
MELB_ECOLI_model1_clean_residues_removed	Inner_Membrane	{'O': 'Periplasmic_C', 'N': 'Cytoplasmic'}	OPM	Uniprot_Failed	Exists	Pass
AF-P0A6A0-F1-model_v2	Inner_Membrane	{u'O': u'Periplasmic_C', u'N': u'Cytoplasmic'}	OPM	Manually
AF-P76103-F1-model_v2	Inner_Membrane	{'O': 'Periplasmic_C', 'N': 'Cytoplasmic'}	OPM	Uniprot_Failed	Exists	Pass
AF-P0AC05-F1-model_v2	Inner_Membrane	{u'O': u'Periplasmic_C', u'N': u'Cytoplasmic'}	OPM	Manually	Exists	Exists
AF-P76334-F1-model_v2	Inner_Membrane	{'O': 'Periplasmic_C', 'N': 'Cytoplasmic'}	OPM	Uniprot_Failed
P0AC07_1_89_6r69	Inner_Membrane	{u'O': u'IM_1', u'N': u'IM_2'}	OPM	Manually
AF-P39381-F1-model_v2	Inner_Membrane	{u'O': u'IM_1', u'N': u'IM_2'}	OPM	Manually	Pass	Pass
AF-P0ABN9-F1-model_v2	Inner_Membrane	{'O': 'Cytoplasmic', 'N': 'Periplasmic_C'}	OPM	Uniprot_Failed	Exists	Pass
AF-P18392-F1-model_v2	Inner_Membrane	{'O': 'Periplasmic_C', 'N': 'Cytoplasmic'}	OPM	Uniprot_Failed
ABC-56-CPLX_AlphaMulti	Inner_Membrane	{'O': 'Periplasmic_C', 'N': 'Cytoplasmic'}	OPM	Uniprot_Failed	Exists	Pass
AF-P0AEW1-F1-model_v2	Inner_Membrane	{'O': 'Cytoplasmic', 'N': 'Periplasmic_C'}	OPM	Uniprot_Failed	Exists	Pass
AF-P76552-F1-model_v2	Inner_Membrane	{u'O': u'IM_1', u'N': u'IM_2'}	OPM	Manually	Exists	Pass
EIISGA_AlphaMulti	Inner_Membrane	{u'O': u'Cytoplasmic', u'N': u'Periplasmic_C'}	OPM	Manually	Exists	Pass
AF-P38101-F1-model_v2	Inner_Membrane	{'O': 'Cytoplasmic', 'N': 'Periplasmic_C'}	OPM	Uniprot_Passed	Pass	Exists
P0ABA0_2_156_5t4o	Inner_Membrane	{u'O': u'Cytoplasmic', u'N': u'Periplasmic_C'}	OPM	Manually
ABC-20-CPLX_AlphaMulti	Inner_Membrane	{'O': 'Periplasmic_C', 'N': 'Cytoplasmic'}	OPM	Uniprot_Failed	Exists	Pass
AF-P50466-F1-model_v2	Inner_Membrane	{'O': 'Periplasmic_C', 'N': 'Cytoplasmic'}	OPM	Uniprot_Failed
AF-P42603-F1-model_v2	Inner_Membrane	{'O': 'Cytoplasmic', 'N': 'Periplasmic_C'}	OPM	Uniprot_Failed	Exists	Pass
CPLX0-3241_AlphaMulti	Inner_Membrane	{'O': 'Periplasmic_C', 'N': 'Cytoplasmic'}	OPM	Uniprot_Passed	Pass	Pass
AF-P28303-F1-model_v2	Inner_Membrane	{u'O': u'IM_1', u'N': u'IM_2'}	OPM	Manually	Exists	Pass
YHGN_ECOLI_model1_clean_residues_removed	Inner_Membrane	{'O': 'Cytoplasmic', 'N': 'Periplasmic_C'}	OPM	Uniprot_Passed	Pass	Exists
NUPC-MONOMER_AlphaMulti	Inner_Membrane	{'O': 'Periplasmic_C', 'N': 'Cytoplasmic'}	OPM	Uniprot_Failed	Exists	Exists
SETC_ECOLI_model1_clean_residues_removed	Inner_Membrane	{'O': 'Cytoplasmic', 'N': 'Periplasmic_C'}	OPM	Uniprot_Passed	Pass	Pass
AF-P64512-F1-model_v2	Inner_Membrane	{'O': 'Periplasmic_C', 'N': 'Cytoplasmic'}	OPM	Uniprot_Failed
AF-P0AAD8-F1-model_v2	Inner_Membrane	{u'O': u'IM_1', u'N': u'IM_2'}	OPM	Manually	Pass	Pass
ABC-48-CPLX_AlphaMulti	Inner_Membrane	{'O': 'Cytoplasmic', 'N': 'Periplasmic_C'}	OPM	Uniprot_Passed	Pass	Pass
ABC-2-CPLX_AlphaMulti	Inner_Membrane	{u'O': u'Periplasmic_C', u'N': u'Cytoplasmic'}	OPM	Manually	Pass	Pass
AF-Q2EES6-F1-model_v2	Inner_Membrane	{u'O': u'IM_1', u'N': u'IM_2'}	OPM	Manually
AF-P43676-F1-model_v2	Inner_Membrane	{u'O': u'IM_1', u'N': u'IM_2'}	OPM	Manually	Exists	Exists
P60955_3_286_5azc	Inner_Membrane	{'O': 'Cytoplasmic', 'N': 'Periplasmic_C'}	OPM	Uniprot_Failed	Exists	Pass
AF-P07018-F1-model_v2	Inner_Membrane	{'O': 'Periplasmic_C', 'N': 'Cytoplasmic'}	OPM	Uniprot_Failed
P0A769_16_405_6bu5	Inner_Membrane	{'O': 'Periplasmic_C', 'N': 'Cytoplasmic'}	OPM	Uniprot_Failed	Exists	Pass
AF-P0A712-F1-model_v2	Inner_Membrane	{'O': 'Periplasmic_C', 'N': 'Cytoplasmic'}	OPM	Uniprot_Passed	Pass	Pass
AF-P33011-F1-model_v2	Inner_Membrane	{'O': 'Periplasmic_C', 'N': 'Cytoplasmic'}	OPM	Uniprot_Failed	Exists	Exists
DIMESULFREDUCT-CPLX_AlphaMulti	Inner_Membrane	{'O': 'Periplasmic_C', 'N': 'Cytoplasmic'}	OPM	Uniprot_Failed	Exists	Pass
DCTA-MONOMER_AlphaMulti	Inner_Membrane	{u'O': u'Periplasmic_C', u'N': u'Cytoplasmic'}	OPM	Manually	Pass	Pass
P0AER0_6_259_1ldf	Inner_Membrane	{'O': 'Periplasmic_C', 'N': 'Cytoplasmic'}	OPM	Uniprot_Passed	Pass
P0ABI4_1_316_3jcf	Inner_Membrane	{'O': 'Periplasmic_C', 'N': 'Cytoplasmic'}	OPM	Uniprot_Failed	Exists	Pass
P13738_10_388_4au5	Inner_Membrane	{'O': 'Periplasmic_C', 'N': 'Cytoplasmic'}	OPM	Uniprot_Passed	Pass	Pass
ABC-14-CPLX_AlphaMulti	Inner_Membrane	{'O': 'Cytoplasmic', 'N': 'Periplasmic_C'}	OPM	Uniprot_Passed	Pass	Pass
AF-P31462-F1-model_v2	Inner_Membrane	{'O': 'Periplasmic_C', 'N': 'Cytoplasmic'}	OPM	Uniprot_Passed	Pass	Pass
AF-P31433-F1-model_v2	Inner_Membrane	{u'O': u'Periplasmic_C', u'N': u'Cytoplasmic'}	OPM	Manually
AF-P33650-F1-model_v2	Inner_Membrane	{'O': 'Periplasmic_C', 'N': 'Cytoplasmic'}	OPM	Uniprot_Failed	Exists	Pass
ATPE-CPLX_AlphaMulti	Inner_Membrane	{'O': 'Cytoplasmic', 'N': 'Periplasmic_C'}	OPM	Uniprot_Passed	Pass	Pass
AF-P0A8K8-F1-model_v2	Inner_Membrane	{'O': 'Periplasmic_C', 'N': 'Cytoplasmic'}	OPM	Uniprot_Failed	Exists	Pass
AF-P46879-F1-model_v2	Inner_Membrane	{u'O': u'IM_1', u'N': u'IM_2'}	OPM	Manually
P0AE24_19_464_6h7d	Inner_Membrane	{'O': 'Periplasmic_C', 'N': 'Cytoplasmic'}	OPM	Uniprot_Passed	Pass	Pass
AF-P76421-F1-model_v2	Inner_Membrane	{u'O': u'Periplasmic_C', u'N': u'Cytoplasmic'}	OPM	Manually
P31675_7_390_3wdo	Inner_Membrane	{'O': 'Periplasmic_C', 'N': 'Cytoplasmic'}	OPM	Uniprot_Passed	Pass	Pass
AF-P67601-F1-model_v2	Inner_Membrane	{'O': 'Periplasmic_C', 'N': 'Cytoplasmic'}	OPM	Uniprot_Passed	Pass	Pass
AF-P76399-F1-model_v2	Inner_Membrane	{'O': 'Periplasmic_C', 'N': 'Cytoplasmic'}	OPM	Uniprot_Failed	Exists	Pass
AF-P36646-F1-model_v2	Inner_Membrane	{u'O': u'Cytoplasmic', u'N': u'Periplasmic_C'}	OPM	Manually	Exists	Exists
P0DPD0_1_35_5lbj	Inner_Membrane	{u'O': u'IM_1', u'N': u'IM_2'}	OPM	Manually
AF-P0AD99-F1-model_v2	Inner_Membrane	{'O': 'Periplasmic_C', 'N': 'Cytoplasmic'}	OPM	Uniprot_Passed	Pass	Pass
YCDT_ECOLI_model1_clean_residues_removed	Inner_Membrane	{'O': 'Periplasmic_C', 'N': 'Cytoplasmic'}	OPM	Uniprot_Failed	Exists	Exists
AF-P76180-F1-model_v2	Inner_Membrane	{'O': 'Periplasmic_C', 'N': 'Cytoplasmic'}	OPM	Uniprot_Failed	Exists	Pass
AF-P56976-F1-model_v2	Inner_Membrane	{'O': 'Periplasmic_C', 'N': 'Cytoplasmic'}	OPM	Uniprot_Failed
AF-P27835-F1-model_v2	Inner_Membrane	{u'O': u'IM_1', u'N': u'IM_2'}	OPM	Manually	Exists	Pass
AF-P76298-F1-model_v2	Inner_Membrane	{u'O': u'Periplasmic_C', u'N': u'Cytoplasmic'}	OPM	Manually	Exists	Pass
CPLX0-8120_AlphaMulti	Inner_Membrane	{'O': 'Periplasmic_C', 'N': 'Cytoplasmic'}	OPM	Uniprot_Passed	Pass	Pass
AF-P64536-F1-model_v2	Inner_Membrane	{u'O': u'IM_1', u'N': u'IM_2'}	OPM	Manually
AF-P77610-F1-model_v2	Inner_Membrane	{u'O': u'IM_1', u'N': u'IM_2'}	OPM	Manually	Pass	Pass
AF-P38134-F1-model_v2	Inner_Membrane	{'O': 'Periplasmic_C', 'N': 'Cytoplasmic'}	OPM	Uniprot_Failed
AF-P0ADJ8-F1-model_v2	Inner_Membrane	{'O': 'Periplasmic_C', 'N': 'Cytoplasmic'}	OPM	Uniprot_Passed	Pass	Pass
P77726_3_454_3wdo	Inner_Membrane	{'O': 'Periplasmic_C', 'N': 'Cytoplasmic'}	OPM	Uniprot_Failed	Exists	Pass
AF-P33941-F1-model_v2	Inner_Membrane	{u'O': u'Periplasmic_C', u'N': u'Cytoplasmic'}	OPM	Manually	Exists	Exists
AF-P39277-F1-model_v2	Inner_Membrane	{'O': 'Cytoplasmic', 'N': 'Periplasmic_C'}	OPM	Uniprot_Passed	Pass	Pass
AF-P40876-F1-model_v2	Inner_Membrane	{u'O': u'Periplasmic_C', u'N': u'Cytoplasmic'}	OPM	Manually
AF-P71241-F1-model_v2	Inner_Membrane	{'O': 'Periplasmic_C', 'N': 'Cytoplasmic'}	OPM	Uniprot_Failed	Exists	Pass
SETB_ECOLI_model1_clean_residues_removed	Inner_Membrane	{u'O': u'IM_1', u'N': u'IM_2'}	OPM	Manually	Pass	Pass
AF-Q46943-F1-model_v2	Inner_Membrane	{u'O': u'Periplasmic_C', u'N': u'Cytoplasmic'}	OPM	Manually
AF-P60869-F1-model_v2	Inner_Membrane	{u'O': u'Periplasmic_C', u'N': u'Cytoplasmic'}	OPM	Manually	Pass	Pass
AF-P75910-F1-model_v2	Inner_Membrane	{u'O': u'Periplasmic_C', u'N': u'Cytoplasmic'}	OPM	Manually	Pass	Pass
P30845_9_544_5fgn	Inner_Membrane	{'O': 'Periplasmic_C', 'N': 'Cytoplasmic'}	OPM	Uniprot_Failed	Exists	Exists
P0C0S1_16_280_6rld	Inner_Membrane	{'O': 'Cytoplasmic', 'N': 'Periplasmic_C'}	OPM	Uniprot_Passed	Pass	Pass
AF-P52101-F1-model_v2	Inner_Membrane	{'O': 'Periplasmic_C', 'N': 'Cytoplasmic'}	OPM	Uniprot_Failed
AF-P0AF54-F1-model_v2	Inner_Membrane	{'O': 'Periplasmic_C', 'N': 'Cytoplasmic'}	OPM	Uniprot_Failed
AF-P25737-F1-model_v2	Inner_Membrane	{'O': 'Periplasmic_C', 'N': 'Cytoplasmic'}	OPM	Uniprot_Passed	Pass	Pass
CPLX-63_AlphaMulti	Inner_Membrane	{'O': 'Periplasmic_C', 'N': 'Cytoplasmic'}	OPM	Uniprot_Failed
AF-P0ACG6-F1-model_v2	Inner_Membrane	{u'O': u'IM_1', u'N': u'IM_2'}	OPM	Manually
AF-P37659-F1-model_v2	Inner_Membrane	{u'O': u'Periplasmic_C', u'N': u'Cytoplasmic'}	OPM	Manually	Pass	Exists
AF-P77579-F1-model_v2	Inner_Membrane	{'O': 'Periplasmic_C', 'N': 'Cytoplasmic'}	OPM	Uniprot_Failed	Exists	Pass
AF-P64499-F1-model_v2	Inner_Membrane	{u'O': u'IM_1', u'N': u'IM_2'}	OPM	Manually
AF-P75920-F1-model_v2	Inner_Membrane	{u'O': u'IM_1', u'N': u'IM_2'}	OPM	Manually	Pass	Pass
b1885_2__AlphaMulti	Inner_Membrane	{'O': 'Periplasmic_C', 'N': 'Cytoplasmic'}	OPM	Uniprot_Failed	Exists	Pass
6wti-assembly1	Inner_Membrane	{u'O': u'Periplasmic_C', u'N': u'Cytoplasmic'}	OPM	Manually
7dla-assembly1	Inner_Membrane	{'O': 'Periplasmic_C', 'N': 'Cytoplasmic'}	OPM	Uniprot_Passed	Pass	Pass
AF-P0DPN0-F1-model_v2	Inner_Membrane	{u'O': u'IM_1', u'N': u'IM_2'}	OPM	Manually
AF-P33135-F1-model_v2	Inner_Membrane	{u'O': u'IM_1', u'N': u'IM_2'}	OPM	Manually	Exists	Exists
P11551_22_435_3o7q	Inner_Membrane	{'O': 'Periplasmic_C', 'N': 'Cytoplasmic'}	OPM	Uniprot_Passed	Pass	Pass
AF-P39396-F1-model_v2	Inner_Membrane	{'O': 'Periplasmic_C', 'N': 'Cytoplasmic'}	OPM	Uniprot_Passed	Pass	Pass
AF-P0AA67-F1-model_v2	Inner_Membrane	{'O': 'Periplasmic_C', 'N': 'Cytoplasmic'}	OPM	Uniprot_Passed	Pass	Pass
1fx8-assembly1	Inner_Membrane	{u'O': u'IM_1', u'N': u'IM_2'}	OPM	Manually
ABC-49-CPLX_AlphaMulti	Inner_Membrane	{'O': 'Periplasmic_C', 'N': 'Cytoplasmic'}	OPM	Uniprot_Passed	Pass	Pass
AF-P33669-F1-model_v2	Inner_Membrane	{u'O': u'Periplasmic_C', u'N': u'Cytoplasmic'}	OPM	Manually
P45539_5_439_5j4i	Inner_Membrane	{u'O': u'IM_1', u'N': u'IM_2'}	OPM	Manually	Exists	Pass
AF-P0ADM6-F1-model_v2	Inner_Membrane	{u'O': u'Periplasmic_C', u'N': u'Cytoplasmic'}	OPM	Manually
ABC-59-CPLX_AlphaMulti	Inner_Membrane	{'O': 'Periplasmic_C', 'N': 'Cytoplasmic'}	OPM	Uniprot_Passed	Pass	Pass
P37002_2_125_5kbn	Inner_Membrane	{u'O': u'IM_1', u'N': u'IM_2'}	OPM	Manually	Exists	Exists
AF-P09835-F1-model_v2	Inner_Membrane	{'O': 'Cytoplasmic', 'N': 'Periplasmic_C'}	OPM	Uniprot_Passed	Pass	Pass
AF-P45751-F1-model_v2	Inner_Membrane	{u'O': u'Cytoplasmic', u'N': u'Periplasmic_C'}	OPM	Manually
AF-P37661-F1-model_v2	Inner_Membrane	{'O': 'Periplasmic_C', 'N': 'Cytoplasmic'}	OPM	Uniprot_Passed	Pass	Pass
ABC-21-CPLX_AlphaMulti	Inner_Membrane	{'O': 'Cytoplasmic', 'N': 'Periplasmic_C'}	OPM	Uniprot_Failed	Exists	Pass
YGHE_ECOLI_model1_clean_residues_removed	Inner_Membrane	{u'O': u'IM_1', u'N': u'IM_2'}	OPM	Manually
AF-P0AGH1-F1-model_v2	Inner_Membrane	{'O': 'Periplasmic_C', 'N': 'Cytoplasmic'}	OPM	Uniprot_Passed	Pass	Exists
AF-P76169-F1-model_v2	Inner_Membrane	{'O': 'Cytoplasmic', 'N': 'Periplasmic_C'}	OPM	Uniprot_Failed	Exists	Exists
AF-P0AF52-F1-model_v2	Inner_Membrane	{'O': 'Periplasmic_C', 'N': 'Cytoplasmic'}	OPM	Uniprot_Passed	Pass	Pass
P31553_8_503_2wsx	Inner_Membrane	{u'O': u'Periplasmic_C', u'N': u'Cytoplasmic'}	OPM	Manually	Pass	Pass
HCAT_ECOLI_model1_clean_residues_removed	Inner_Membrane	{'O': 'Periplasmic_C', 'N': 'Cytoplasmic'}	OPM	Uniprot_Passed	Pass	Pass
AF-P76147-F1-model_v2	Inner_Membrane	{u'O': u'Cytoplasmic', u'N': u'Periplasmic_C'}	OPM	Manually	Exists	Exists
AF-P0AAS3-F1-model_v2	Inner_Membrane	{'O': 'Cytoplasmic', 'N': 'Periplasmic_C'}	OPM	Uniprot_Failed	Exists	Exists
P37637_1_1032_6baj	Inner_Membrane	{u'O': u'Periplasmic_C', u'N': u'Cytoplasmic'}	OPM	Manually
AF-Q46836-F1-model_v2	Inner_Membrane	{'O': 'Cytoplasmic', 'N': 'Periplasmic_C'}	OPM	Uniprot_Failed	Exists	Pass
AF-P0ADM0-F1-model_v2	Inner_Membrane	{'O': 'Periplasmic_C', 'N': 'Cytoplasmic'}	OPM	Uniprot_Failed	Exists	Pass
AF-P0AFV2-F1-model_v2	Inner_Membrane	{u'O': u'Periplasmic_C', u'N': u'Cytoplasmic'}	OPM	Manually	Pass	Pass
CPLX-7_AlphaMulti	Inner_Membrane	{'O': 'Cytoplasmic', 'N': 'Periplasmic_C'}	OPM	Uniprot_Passed	Pass	Pass
AF-P76339-F1-model_v2	Inner_Membrane	{'O': 'Periplasmic_C', 'N': 'Cytoplasmic'}	OPM	Uniprot_Failed
AF-P46119-F1-model_v2	Inner_Membrane	{u'O': u'IM_1', u'N': u'IM_2'}	OPM	Manually
AF-P39297-F1-model_v2	Inner_Membrane	{u'O': u'Periplasmic_C', u'N': u'Cytoplasmic'}	OPM	Manually
AF-P38055-F1-model_v2	Inner_Membrane	{'O': 'Periplasmic_C', 'N': 'Cytoplasmic'}	OPM	Uniprot_Passed	Pass	Pass
AF-P54745-F1-model_v2	Inner_Membrane	{'O': 'Cytoplasmic', 'N': 'Periplasmic_C'}	OPM	Uniprot_Failed	Exists	Exists
AF-P76228-F1-model_v2	Inner_Membrane	{'O': 'Cytoplasmic', 'N': 'Periplasmic_C'}	OPM	Uniprot_Failed	Exists
AF-Q46867-F1-model_v2	Inner_Membrane	{'O': 'Cytoplasmic', 'N': 'Periplasmic_C'}	OPM	Uniprot_Passed	Pass	Pass
AF-P76236-F1-model_v2	Inner_Membrane	{'O': 'Cytoplasmic', 'N': 'Periplasmic_C'}	OPM	Uniprot_Passed	Pass	Pass
AF-P08371-F1-model_v2	Inner_Membrane	{u'O': u'Periplasmic_C', u'N': u'Cytoplasmic'}	OPM	Manually
AF-P03825-F1-model_v2	Inner_Membrane	{u'O': u'IM_1', u'N': u'IM_2'}	OPM	Manually
AF-P60782-F1-model_v2	Inner_Membrane	{'O': 'Cytoplasmic', 'N': 'Periplasmic_C'}	OPM	Uniprot_Failed	Exists	Pass
AF-Q46834-F1-model_v2	Inner_Membrane	{u'O': u'Periplasmic_C', u'N': u'Cytoplasmic'}	OPM	Manually
AF-P42615-F1-model_v2	Inner_Membrane	{'O': 'Periplasmic_C', 'N': 'Cytoplasmic'}	OPM	Uniprot_Failed
AF-P76538-F1-model_v2	Inner_Membrane	{'O': 'Periplasmic_C', 'N': 'Cytoplasmic'}	OPM	Uniprot_Passed	Pass	Pass
CPLX0-1321_AlphaMulti	Inner_Membrane	{'O': 'Periplasmic_C', 'N': 'Cytoplasmic'}	OPM	Uniprot_Failed
ABC-32-CPLX_AlphaMulti	Inner_Membrane	{u'O': u'Periplasmic_C', u'N': u'Cytoplasmic'}	OPM	Manually	Pass	Pass
AF-P0AAD2-F1-model_v2	Inner_Membrane	{'O': 'Periplasmic_C', 'N': 'Cytoplasmic'}	OPM	Uniprot_Passed	Pass	Pass
ABC-24-CPLX_AlphaMulti	Inner_Membrane	{'O': 'Periplasmic_C', 'N': 'Cytoplasmic'}	OPM	Uniprot_Passed	Pass	Pass
AF-P0AAE5-F1-model_v2	Inner_Membrane	{'O': 'Periplasmic_C', 'N': 'Cytoplasmic'}	OPM	Uniprot_Passed	Pass	Pass
AF-P0ADW3-F1-model_v2	Inner_Membrane	{'O': 'Cytoplasmic', 'N': 'Periplasmic_C'}	OPM	Uniprot_Failed
AF-P0AE82-F1-model_v2	Inner_Membrane	{'O': 'Periplasmic_C', 'N': 'Cytoplasmic'}	OPM	Uniprot_Failed
AF-P41442-F1-model_v2	Inner_Membrane	{u'O': u'Periplasmic_C', u'N': u'Cytoplasmic'}	OPM	Manually
AF-P46022-F1-model_v2	Inner_Membrane	{u'O': u'Periplasmic_C', u'N': u'Cytoplasmic'}	OPM	Manually
P0A6W3_15_359_6oyh	Inner_Membrane	{'O': 'Cytoplasmic', 'N': 'Periplasmic_C'}	OPM	Uniprot_Passed	Pass	Pass
AF-P52134-F1-model_v2	Inner_Membrane	{u'O': u'IM_1', u'N': u'IM_2'}	OPM	Manually
AF-P37147-F1-model_v2	Inner_Membrane	{'O': 'Cytoplasmic', 'N': 'Periplasmic_C'}	OPM	Uniprot_Failed		Exists
AF-P46136-F1-model_v2	Inner_Membrane	{'O': 'Periplasmic_C', 'N': 'Cytoplasmic'}	OPM	Uniprot_Passed	Pass	Pass
AF-P76361-F1-model_v2	Inner_Membrane	{'O': 'Cytoplasmic', 'N': 'Periplasmic_C'}	OPM	Uniprot_Passed	Pass	Exists
AF-P77485-F1-model_v2	Inner_Membrane	{'O': 'Periplasmic_C', 'N': 'Cytoplasmic'}	OPM	Uniprot_Failed
AF-P76219-F1-model_v2	Inner_Membrane	{u'O': u'IM_1', u'N': u'IM_2'}	OPM	Manually	Exists	Exists
AF-P60778-F1-model_v2	Inner_Membrane	{'O': 'Periplasmic_C', 'N': 'Cytoplasmic'}	OPM	Uniprot_Passed	Pass	Pass
P0ADP5_2_281_5i20	Inner_Membrane	{u'O': u'Periplasmic_C', u'N': u'Cytoplasmic'}	OPM	Manually	Pass	Pass
AF-C1P620-F1-model_v2	Inner_Membrane	{u'O': u'IM_1', u'N': u'IM_2'}	OPM	Manually
AF-P0AD19-F1-model_v2	Inner_Membrane	{'O': 'Cytoplasmic', 'N': 'Periplasmic_C'}	OPM	Uniprot_Failed	Exists	Pass
GLPT_ECOLI_model1_clean_residues_removed	Inner_Membrane	{'O': 'Periplasmic_C', 'N': 'Cytoplasmic'}	OPM	Uniprot_Passed	Pass	Pass
AF-P0A766-F1-model_v2	Inner_Membrane	{'O': 'Cytoplasmic', 'N': 'Periplasmic_C'}	OPM	Uniprot_Passed	Pass	Pass
AF-P0AFS9-F1-model_v2	Inner_Membrane	{'O': 'Periplasmic_C', 'N': 'Cytoplasmic'}	OPM	Uniprot_Failed
P69937_3_103_2i68	Inner_Membrane	{'O': 'Cytoplasmic', 'N': 'Periplasmic_C'}	OPM	Uniprot_Failed	Exists	Pass
AF-P75958-F1-model_v2	Inner_Membrane	{u'O': u'Periplasmic_C', u'N': u'Cytoplasmic'}	OPM	Manually	Exists	Exists
AF-P0ABN5-F1-model_v2	Inner_Membrane	{'O': 'Cytoplasmic', 'N': 'Periplasmic_C'}	OPM	Uniprot_Failed	Exists	Exists
AF-P32108-F1-model_v2	Inner_Membrane	{u'O': u'IM_1', u'N': u'IM_2'}	OPM	Manually		Exists
AF-P75955-F1-model_v2	Inner_Membrane	{'O': 'Periplasmic_C', 'N': 'Cytoplasmic'}	OPM	Uniprot_Failed	Exists	Pass
YBJJ_ECOLI_model1_clean_residues_removed	Inner_Membrane	{'O': 'Periplasmic_C', 'N': 'Cytoplasmic'}	OPM	Uniprot_Passed	Pass	Pass
AF-P0ADJ5-F1-model_v2	Inner_Membrane	{u'O': u'IM_1', u'N': u'IM_2'}	OPM	Manually
ABC-22-CPLX_AlphaMulti	Inner_Membrane	{'O': 'Periplasmic_C', 'N': 'Cytoplasmic'}	OPM	Uniprot_Passed	Pass	Pass
TORS-CPLX_AlphaMulti	Inner_Membrane	{'Periplasmic_C': 'Periplasmic_C', 'Cytoplasmic': 'Cytoplasmic'}	Uniprot	Uniprot_Passed	Pass	Pass
AF-P42598-F1-model_v2	Inner_Membrane	{u'O': u'Periplasmic_C', u'N': u'Cytoplasmic'}	OPM	Manually
XAPB_ECOLI_model1_clean_residues_removed	Inner_Membrane	{'O': 'Periplasmic_C', 'N': 'Cytoplasmic'}	OPM	Uniprot_Passed	Pass	Pass
AF-P33015-F1-model_v2	Inner_Membrane	{'O': 'Cytoplasmic', 'N': 'Periplasmic_C'}	OPM	Uniprot_Failed	Exists	Pass
AF-P0ACY6-F1-model_v2	Inner_Membrane	{u'O': u'IM_1', u'N': u'IM_2'}	OPM	Manually	Exists	Pass
AF-P0AFA5-F1-model_v2	Inner_Membrane	{u'O': u'Cytoplasmic', u'N': u'Periplasmic_C'}	OPM	Manually	Pass	Pass
AF-P45763-F1-model_v2	Inner_Membrane	{'O': 'Periplasmic_C', 'N': 'Cytoplasmic'}	OPM	Uniprot_Failed
AF-P33236-F1-model_v2	Inner_Membrane	{u'O': u'IM_1', u'N': u'IM_2'}	OPM	Manually
b1421_2__AlphaMulti	Inner_Membrane	{'O': 'Periplasmic_C', 'N': 'Cytoplasmic'}	OPM	Uniprot_Failed	Exists	Exists
AF-P0AF43-F1-model_v2	Inner_Membrane	{u'O': u'IM_1', u'N': u'IM_2'}	OPM	Manually	Exists	Exists
AF-P52138-F1-model_v2	Inner_Membrane	{u'O': u'Periplasmic_C', u'N': u'Cytoplasmic'}	OPM	Manually	Pass	Pass
AF-P05704-F1-model_v2	Inner_Membrane	{'O': 'Periplasmic_C', 'N': 'Cytoplasmic'}	OPM	Uniprot_Failed
AF-P30143-F1-model_v2	Inner_Membrane	{u'O': u'IM_1', u'N': u'IM_2'}	OPM	Manually	Exists	Pass
AF-P25960-F1-model_v2	Inner_Membrane	{'O': 'Cytoplasmic', 'N': 'Periplasmic_C'}	OPM	Uniprot_Failed	Exists	Pass
AF-P0AA63-F1-model_v2	Inner_Membrane	{'O': 'Cytoplasmic', 'N': 'Periplasmic_C'}	OPM	Uniprot_Failed	Exists	Exists
AF-P77510-F1-model_v2	Inner_Membrane	{'O': 'Periplasmic_C', 'N': 'Cytoplasmic'}	OPM	Uniprot_Failed
CYT-D-UBIOX-CPLX_AlphaMulti	Inner_Membrane	{'O': 'Cytoplasmic', 'N': 'Periplasmic_C'}	OPM	Uniprot_Passed	Pass	Pass
AF-P0AAF1-F1-model_v2	Inner_Membrane	{'O': 'Periplasmic_C', 'N': 'Cytoplasmic'}	OPM	Uniprot_Failed	Exists	Pass
AF-P0AB12-F1-model_v2	Inner_Membrane	{'O': 'Periplasmic_C', 'N': 'Cytoplasmic'}	OPM	Uniprot_Failed	Exists
YQCE_ECOLI_model1_clean_residues_removed	Inner_Membrane	{'O': 'Periplasmic_C', 'N': 'Cytoplasmic'}	OPM	Uniprot_Passed	Pass	Pass
AF-Q46942-F1-model_v2	Inner_Membrane	{u'O': u'Periplasmic_C', u'N': u'Cytoplasmic'}	OPM	Manually
AF-P0AGM0-F1-model_v2	Inner_Membrane	{'O': 'Periplasmic_C', 'N': 'Cytoplasmic'}	OPM	Uniprot_Failed	Exists	Exists
AF-P32711-F1-model_v2	Inner_Membrane	{u'O': u'IM_1', u'N': u'IM_2'}	OPM	Manually
MDTH_ECOLI_model1_clean_residues_removed	Inner_Membrane	{'O': 'Periplasmic_C', 'N': 'Cytoplasmic'}	OPM	Uniprot_Passed	Pass	Pass
AF-A5A616-F1-model_v2	Inner_Membrane	{'O': 'Cytoplasmic', 'N': 'Periplasmic_C'}	OPM	Uniprot_Failed
AF-P0AD47-F1-model_v2	Inner_Membrane	{'O': 'Periplasmic_C', 'N': 'Cytoplasmic'}	OPM	Uniprot_Passed	Pass	Pass
AF-P77506-F1-model_v2	Inner_Membrane	{u'O': u'IM_1', u'N': u'IM_2'}	OPM	Manually
ABC-61-CPLX_AlphaMulti	Inner_Membrane	{u'O': u'Periplasmic_C', u'N': u'Cytoplasmic'}	OPM	Manually	Pass	Pass
CPLX0-8152_AlphaMulti	Inner_Membrane	{'O': 'Periplasmic_C', 'N': 'Cytoplasmic'}	OPM	Uniprot_Failed	Exists	Pass
AF-P33231-F1-model_v2	Inner_Membrane	{u'O': u'IM_1', u'N': u'IM_2'}	OPM	Manually	Exists	Pass
P10903_14_463_4u4t	Inner_Membrane	{'O': 'Periplasmic_C', 'N': 'Cytoplasmic'}	OPM	Uniprot_Passed	Pass	Pass
ABC-51-CPLX_AlphaMulti	Inner_Membrane	{'O': 'Periplasmic_C', 'N': 'Cytoplasmic'}	OPM	Uniprot_Failed	Exists	Pass
P0AGF4_5_479_4gby	Inner_Membrane	{'O': 'Periplasmic_C', 'N': 'Cytoplasmic'}	OPM	Uniprot_Passed	Pass	Pass
AF-P37624-F1-model_v2	Inner_Membrane	{u'O': u'Periplasmic_C', u'N': u'Cytoplasmic'}	OPM	Manually	Exists	Pass
AF-P52636-F1-model_v2	Inner_Membrane	{'O': 'Periplasmic_C', 'N': 'Cytoplasmic'}	OPM	Uniprot_Passed	Pass	Exists
AF-P39196-F1-model_v2	Inner_Membrane	{'O': 'Periplasmic_C', 'N': 'Cytoplasmic'}	OPM	Uniprot_Failed	Exists	Pass
AF-P37746-F1-model_v2	Inner_Membrane	{'O': 'Periplasmic_C', 'N': 'Cytoplasmic'}	OPM	Uniprot_Failed	Exists	Pass
AF-P0AET5-F1-model_v2	Inner_Membrane	{'O': 'Periplasmic_C', 'N': 'Cytoplasmic'}	OPM	Uniprot_Failed	Exists	Pass
AF-P37615-F1-model_v2	Inner_Membrane	{u'O': u'Periplasmic_C', u'N': u'Cytoplasmic'}	OPM	Manually
AF-P16256-F1-model_v2	Inner_Membrane	{'O': 'Cytoplasmic', 'N': 'Periplasmic_C'}	OPM	Uniprot_Failed	Exists	Pass
AF-P76237-F1-model_v2	Inner_Membrane	{u'O': u'Periplasmic_C', u'N': u'Cytoplasmic'}	OPM	Manually
P37758_12_454_4iu8	Inner_Membrane	{'O': 'Periplasmic_C', 'N': 'Cytoplasmic'}	OPM	Uniprot_Passed	Pass	Pass
TRANS-CPLX-203_AlphaMulti	Inner_Membrane	{'O': 'Periplasmic_C', 'N': 'Cytoplasmic'}	OPM	Uniprot_Passed	Pass	Pass
AF-P75737-F1-model_v2	Inner_Membrane	{u'O': u'Periplasmic_C', u'N': u'Cytoplasmic'}	OPM	Manually
AF-P76278-F1-model_v2	Inner_Membrane	{'O': 'Cytoplasmic', 'N': 'Periplasmic_C'}	OPM	Uniprot_Passed	Pass	Pass
AF-P0AAS0-F1-model_v2	Inner_Membrane	{'O': 'Periplasmic_C', 'N': 'Cytoplasmic'}	OPM	Uniprot_Failed
AF-P33344-F1-model_v2	Inner_Membrane	{u'O': u'Periplasmic_C', u'N': u'Cytoplasmic'}	OPM	Manually
AF-P0AGC7-F1-model_v2	Inner_Membrane	{u'O': u'Periplasmic_C', u'N': u'Cytoplasmic'}	OPM	Manually
AF-P32136-F1-model_v2	Inner_Membrane	{u'O': u'IM_1', u'N': u'IM_2'}	OPM	Manually	Pass	Pass
AF-P76372-F1-model_v2	Inner_Membrane	{'O': 'Periplasmic_C', 'N': 'Cytoplasmic'}	OPM	Uniprot_Failed
AF-P77538-F1-model_v2	Inner_Membrane	{u'O': u'Periplasmic_C', u'N': u'Cytoplasmic'}	OPM	Manually
ABC-11-CPLX_AlphaMulti	Inner_Membrane	{u'O': u'Periplasmic_C', u'N': u'Cytoplasmic'}	OPM	Manually	Exists	Pass
ABC-34-CPLX_AlphaMulti	Inner_Membrane	{'O': 'Periplasmic_C', 'N': 'Cytoplasmic'}	OPM	Uniprot_Failed	Exists	Pass
P60061_5_441_5j4i	Inner_Membrane	{'O': 'Periplasmic_C', 'N': 'Cytoplasmic'}	OPM	Uniprot_Passed	Pass	Pass
AF-P77389-F1-model_v2	Inner_Membrane	{'O': 'Periplasmic_C', 'N': 'Cytoplasmic'}	OPM	Uniprot_Passed	Pass	Pass
AF-P0A8S5-F1-model_v2	Inner_Membrane	{'O': 'Cytoplasmic', 'N': 'Periplasmic_C'}	OPM	Uniprot_Failed
AF-P76425-F1-model_v2	Inner_Membrane	{'O': 'Cytoplasmic', 'N': 'Periplasmic_C'}	OPM	Uniprot_Passed	Pass	Exists
AF-P64646-F1-model_v2	Inner_Membrane	{u'O': u'IM_1', u'N': u'IM_2'}	OPM	Manually
AF-P0AAR5-F1-model_v2	Inner_Membrane	{'O': 'Periplasmic_C', 'N': 'Cytoplasmic'}	OPM	Uniprot_Failed	Exists	Exists
8f4r-assembly1	Inner_Membrane	{u'O': u'Periplasmic_C', u'N': u'Cytoplasmic'}	OPM	Manually
AF-P0AAV0-F1-model_v2	Inner_Membrane	{u'O': u'IM_1', u'N': u'IM_2'}	OPM	Manually		Pass
ABC-9-CPLX_AlphaMulti	Inner_Membrane	{'O': 'Cytoplasmic', 'N': 'Periplasmic_C'}	OPM	Uniprot_Failed	Exists	Pass
AF-P75693-F1-model_v2	Inner_Membrane	{u'O': u'IM_1', u'N': u'IM_2'}	OPM	Manually	Exists	Exists
AF-P0ADN6-F1-model_v2	Inner_Membrane	{u'O': u'Periplasmic_C', u'N': u'Cytoplasmic'}	OPM	Manually
AF-P76482-F1-model_v2	Inner_Membrane	{u'O': u'Periplasmic_C', u'N': u'Cytoplasmic'}	OPM	Manually
AF-P76136-F1-model_v2	Inner_Membrane	{'O': 'Periplasmic_C', 'N': 'Cytoplasmic'}	OPM	Uniprot_Failed
AF-P77180-F1-model_v2	Inner_Membrane	{u'O': u'IM_1', u'N': u'IM_2'}	OPM	Manually
P0DPD1_1_35_5lbj	Inner_Membrane	{u'O': u'IM_1', u'N': u'IM_2'}	OPM	Manually
AF-P64590-F1-model_v2	Inner_Membrane	{'O': 'Cytoplasmic', 'N': 'Periplasmic_C'}	OPM	Uniprot_Failed	Exists	Pass
AF-P77549-F1-model_v2	Inner_Membrane	{'O': 'Periplasmic_C', 'N': 'Cytoplasmic'}	OPM	Uniprot_Passed	Pass	Pass
AF-P75806-F1-model_v2	Inner_Membrane	{'O': 'Periplasmic_C', 'N': 'Cytoplasmic'}	OPM	Uniprot_Failed	Exists	Exists
AF-P55734-F1-model_v2	Inner_Membrane	{'O': 'Periplasmic_C', 'N': 'Cytoplasmic'}	OPM	Uniprot_Failed
AF-P0ADI9-F1-model_v2	Inner_Membrane	{u'O': u'IM_1', u'N': u'IM_2'}	OPM	Manually	Exists	Pass
AF-P0AAP7-F1-model_v2	Inner_Membrane	{'O': 'Periplasmic_C', 'N': 'Cytoplasmic'}	OPM	Uniprot_Failed
AF-A5A630-F1-model_v2	Inner_Membrane	{u'O': u'IM_1', u'N': u'IM_2'}	OPM	Manually
AF-P0AF34-F1-model_v2	Inner_Membrane	{u'O': u'IM_1', u'N': u'IM_2'}	OPM	Manually		Exists
AF-P76330-F1-model_v2	Inner_Membrane	{u'O': u'Periplasmic_C', u'N': u'Cytoplasmic'}	OPM	Manually
AF-P14377-F1-model_v2	Inner_Membrane	{u'O': u'Periplasmic_C', u'N': u'Cytoplasmic'}	OPM	Manually
7ph4-assembly1	Inner_Membrane	{u'O': u'Periplasmic_C', u'N': u'Cytoplasmic'}	OPM	Manually
P00804_2_156_6fms	Inner_Membrane	{'O': 'Periplasmic_C', 'N': 'Cytoplasmic'}	OPM	Uniprot_Failed	Exists	Exists
AF-P76186-F1-model_v2	Inner_Membrane	{u'O': u'Cytoplasmic', u'N': u'Periplasmic_C'}	OPM	Manually	Exists	Pass
AF-P77377-F1-model_v2	Inner_Membrane	{'O': 'Periplasmic_C', 'N': 'Cytoplasmic'}	OPM	Uniprot_Failed	Exists	Pass
P0ABN1_7_121_3ze4	Inner_Membrane	{'O': 'Periplasmic_C', 'N': 'Cytoplasmic'}	OPM	Uniprot_Passed	Pass	Pass
ABC-18-CPLX_AlphaMulti	Inner_Membrane	{'O': 'Periplasmic_C', 'N': 'Cytoplasmic'}	OPM	Uniprot_Passed	Pass	Pass
AF-P37597-F1-model_v2	Inner_Membrane	{'O': 'Periplasmic_C', 'N': 'Cytoplasmic'}	OPM	Uniprot_Passed	Pass	Pass
7ph3-assembly1	Inner_Membrane	{u'O': u'Periplasmic_C', u'N': u'Cytoplasmic'}	OPM	Manually	Pass
AF-P28249-F1-model_v2	Inner_Membrane	{u'O': u'Periplasmic_C', u'N': u'Cytoplasmic'}	OPM	Manually
AF-P0AE45-F1-model_v2	Inner_Membrane	{'O': 'Cytoplasmic', 'N': 'Periplasmic_C'}	OPM	Uniprot_Failed	Exists	Exists
AF-P76175-F1-model_v2	Inner_Membrane	{'O': 'Periplasmic_C', 'N': 'Cytoplasmic'}	OPM	Uniprot_Failed	Exists	Exists
YEAN_ECOLI_model1_clean_residues_removed	Inner_Membrane	{'O': 'Periplasmic_C', 'N': 'Cytoplasmic'}	OPM	Uniprot_Passed	Pass	Pass
AF-P02929-F1-model_v2	Inner_Membrane	{'O': 'Periplasmic_C', 'N': 'Cytoplasmic'}	OPM	Uniprot_Failed
P33024_1_416_5l26	Inner_Membrane	{'O': 'Cytoplasmic', 'N': 'Periplasmic_C'}	OPM	Uniprot_Passed	Pass	Pass
AF-P08506-F1-model_v2	Inner_Membrane	{u'O': u'Periplasmic_C', u'N': u'Cytoplasmic'}	OPM	Manually
AF-P37049-F1-model_v2	Inner_Membrane	{u'O': u'Periplasmic_C', u'N': u'Cytoplasmic'}	OPM	Manually
P36837_10_482_6gs1	Inner_Membrane	{'O': 'Periplasmic_C', 'N': 'Cytoplasmic'}	OPM	Uniprot_Passed	Pass	Pass
AF-P45756-F1-model_v2	Inner_Membrane	{u'O': u'Periplasmic_C', u'N': u'Cytoplasmic'}	OPM	Manually
AF-P27303-F1-model_v2	Inner_Membrane	{'O': 'Periplasmic_C', 'N': 'Cytoplasmic'}	OPM	Uniprot_Failed
AF-P39357-F1-model_v2	Inner_Membrane	{u'O': u'IM_1', u'N': u'IM_2'}	OPM	Manually	Exists	Exists
AF-P39365-F1-model_v2	Inner_Membrane	{u'O': u'IM_1', u'N': u'IM_2'}	OPM	Manually	Exists	Pass
AF-P77400-F1-model_v2	Inner_Membrane	{'O': 'Periplasmic_C', 'N': 'Cytoplasmic'}	OPM	Uniprot_Failed	Exists	Pass
AF-P0AF80-F1-model_v2	Inner_Membrane	{'O': 'Cytoplasmic', 'N': 'Periplasmic_C'}	OPM	Uniprot_Failed	Exists	Exists
AF-P45522-F1-model_v2	Inner_Membrane	{u'O': u'IM_1', u'N': u'IM_2'}	OPM	Manually	Pass	Pass
AF-Q2EES1-F1-model_v2	Inner_Membrane	{u'O': u'IM_1', u'N': u'IM_2'}	OPM	Manually
AF-P31466-F1-model_v2	Inner_Membrane	{'O': 'Periplasmic_C', 'N': 'Cytoplasmic'}	OPM	Uniprot_Passed	Pass	Pass
AF-P31437-F1-model_v2	Inner_Membrane	{'O': 'Cytoplasmic', 'N': 'Periplasmic_C'}	OPM	Uniprot_Passed	Pass	Pass
AF-P0AFS7-F1-model_v2	Inner_Membrane	{'O': 'Periplasmic_C', 'N': 'Cytoplasmic'}	OPM	Uniprot_Failed	Exists	Exists
ABC-13-CPLX_AlphaMulti	Inner_Membrane	{'O': 'Cytoplasmic', 'N': 'Periplasmic_C'}	OPM	Uniprot_Passed	Pass	Pass
AF-P0AC94-F1-model_v2	Inner_Membrane	{'O': 'Cytoplasmic', 'N': 'Periplasmic_C'}	OPM	Uniprot_Failed	Exists	Exists
AF-P55914-F1-model_v2	Inner_Membrane	{u'O': u'IM_1', u'N': u'IM_2'}	OPM	Manually		Exists
3usy-assembly4	Inner_Membrane	{u'O': u'IM_1', u'N': u'IM_2'}	OPM	Manually
AF-P0AFU2-F1-model_v2	Inner_Membrane	{u'O': u'IM_1', u'N': u'IM_2'}	OPM	Manually	Exists	Pass
AF-P45565-F1-model_v2	Inner_Membrane	{u'O': u'Periplasmic_C', u'N': u'Cytoplasmic'}	OPM	Manually
AF-P64550-F1-model_v2	Inner_Membrane	{u'O': u'Periplasmic_C', u'N': u'Cytoplasmic'}	OPM	Manually	Exists	Pass
1rc2-assembly3	Inner_Membrane	{'O': 'Periplasmic_C', 'N': 'Cytoplasmic'}	OPM	Uniprot_Passed	Pass	Pass
AF-P07017-F1-model_v2	Inner_Membrane	{'O': 'Periplasmic_C', 'N': 'Cytoplasmic'}	OPM	Uniprot_Failed
AF-P77219-F1-model_v2	Inner_Membrane	{u'O': u'IM_1', u'N': u'IM_2'}	OPM	Manually	Exists	Pass
AF-P31448-F1-model_v2	Inner_Membrane	{'O': 'Cytoplasmic', 'N': 'Periplasmic_C'}	OPM	Uniprot_Passed	Pass	Pass
KGTP_ECOLI_model1_clean_residues_removed	Inner_Membrane	{'O': 'Periplasmic_C', 'N': 'Cytoplasmic'}	OPM	Uniprot_Passed	Pass	Pass
CPLX0-7674_AlphaMulti	Inner_Membrane	{'O': 'Periplasmic_C', 'N': 'Cytoplasmic'}	OPM	Uniprot_Passed	Pass	Pass
AF-P42619-F1-model_v2	Inner_Membrane	{'O': 'Periplasmic_C', 'N': 'Cytoplasmic'}	OPM	Uniprot_Passed	Pass	Pass
AF-P77223-F1-model_v2	Inner_Membrane	{u'O': u'Cytoplasmic', u'N': u'Periplasmic_C'}	OPM	Manually
AF-P67153-F1-model_v2	Inner_Membrane	{'O': 'Periplasmic_C', 'N': 'Cytoplasmic'}	OPM	Uniprot_Failed	Exists	Pass
AF-P33940-F1-model_v2	Inner_Membrane	{u'O': u'Cytoplasmic', u'N': u'Periplasmic_C'}	OPM	Manually
AF-P0AD14-F1-model_v2	Inner_Membrane	{'O': 'Cytoplasmic', 'N': 'Periplasmic_C'}	OPM	Uniprot_Failed	Exists	Exists
P31679_10_435_4zw9	Inner_Membrane	{'O': 'Periplasmic_C', 'N': 'Cytoplasmic'}	OPM	Uniprot_Passed	Pass	Pass
AF-P33554-F1-model_v2	Inner_Membrane	{u'O': u'Periplasmic_C', u'N': u'Cytoplasmic'}	OPM	Manually
AF-P0DPP7-F1-model_v2	Inner_Membrane	{u'O': u'IM_1', u'N': u'IM_2'}	OPM	Manually
AF-P77330-F1-model_v2	Inner_Membrane	{u'O': u'Periplasmic_C', u'N': u'Cytoplasmic'}	OPM	Manually
EVGS_ECOLI_model1_clean_residues_removed	Inner_Membrane	{'O': 'Cytoplasmic', 'N': 'Periplasmic_C'}	OPM	Uniprot_Failed
P77265_3_572_5mkk	Inner_Membrane	{u'O': u'Periplasmic_C', u'N': u'Cytoplasmic'}	OPM	Manually	Exists	Exists
AF-P27840-F1-model_v2	Inner_Membrane	{u'O': u'Periplasmic_C', u'N': u'Cytoplasmic'}	OPM	Manually
CPLX-159_AlphaMulti	Inner_Membrane	{u'O': u'Periplasmic_C', u'N': u'Cytoplasmic'}	OPM	Manually	Exists	Exists
AF-P0A710-F1-model_v2	Inner_Membrane	{'O': 'Periplasmic_C', 'N': 'Cytoplasmic'}	OPM	Uniprot_Failed	Exists	Pass
2exw-assembly1	Inner_Membrane	{'O': 'Periplasmic_C', 'N': 'Cytoplasmic'}	OPM	Uniprot_Passed	Pass	Pass
P75892_19_429_3qe7	Inner_Membrane	{'O': 'Periplasmic_C', 'N': 'Cytoplasmic'}	OPM	Uniprot_Failed	Exists	Pass
4q65-assembly1	Inner_Membrane	{'O': 'Periplasmic_C', 'N': 'Cytoplasmic'}	OPM	Uniprot_Passed	Pass	Pass
AF-P32703-F1-model_v2	Inner_Membrane	{u'O': u'IM_1', u'N': u'IM_2'}	OPM	Manually	Exists	Pass
AF-P0ABV6-F1-model_v2	Inner_Membrane	{'O': 'Periplasmic_C', 'N': 'Cytoplasmic'}	OPM	Uniprot_Failed
AF-P0DPO5-F1-model_v2	Inner_Membrane	{u'O': u'IM_1', u'N': u'IM_2'}	OPM	Manually
AF-P62517-F1-model_v2	Inner_Membrane	{'O': 'Periplasmic_C', 'N': 'Cytoplasmic'}	OPM	Uniprot_Failed	Exists	Exists
AF-P0AE95-F1-model_v2	Inner_Membrane	{u'O': u'Periplasmic_C', u'N': u'Cytoplasmic'}	OPM	Manually
AF-P46125-F1-model_v2	Inner_Membrane	{'O': 'Cytoplasmic', 'N': 'Periplasmic_C'}	OPM	Uniprot_Passed	Pass	Pass
1u6z-assembly1	Inner_Membrane	{u'O': u'IM_1', u'N': u'IM_2'}	OPM	Manually
AF-Q2EET2-F1-model_v2	Inner_Membrane	{u'O': u'Periplasmic_C', u'N': u'Cytoplasmic'}	OPM	Manually
AF-P39414-F1-model_v2	Inner_Membrane	{'O': 'Periplasmic_C', 'N': 'Cytoplasmic'}	OPM	Uniprot_Failed	Exists	Pass
YDIN_ECOLI_model1_clean_residues_removed	Inner_Membrane	{'O': 'Periplasmic_C', 'N': 'Cytoplasmic'}	OPM	Uniprot_Passed	Pass	Pass
AF-Q46817-F1-model_v2	Inner_Membrane	{'O': 'Periplasmic_C', 'N': 'Cytoplasmic'}	OPM	Uniprot_Passed	Pass	Pass
6cb2-assembly1	Inner_Membrane	{u'O': u'Periplasmic_C', u'N': u'Cytoplasmic'}	OPM	Manually	Pass	Pass
P0AAC6_14_217_4pgs	Inner_Membrane	{'O': 'Periplasmic_C', 'N': 'Cytoplasmic'}	OPM	Uniprot_Passed	Pass	Pass
AF-P06282-F1-model_v2	Inner_Membrane	{u'O': u'Periplasmic_C', u'N': u'Cytoplasmic'}	OPM	Manually
AF-P76389-F1-model_v2	Inner_Membrane	{u'O': u'Cytoplasmic', u'N': u'Periplasmic_C'}	OPM	Manually	Exists	Pass
AF-P55140-F1-model_v2	Inner_Membrane	{u'O': u'IM_1', u'N': u'IM_2'}	OPM	Manually	Exists	Exists
2k73-assembly1	Inner_Membrane	{'O': 'Periplasmic_C', 'N': 'Cytoplasmic'}	OPM	Uniprot_Failed	Exists
AF-P45428-F1-model_v2	Inner_Membrane	{'O': 'Cytoplasmic', 'N': 'Periplasmic_C'}	OPM	Uniprot_Failed	Exists	Pass
AF-P0AAQ0-F1-model_v2	Inner_Membrane	{u'O': u'IM_1', u'N': u'IM_2'}	OPM	Manually
7p34-assembly1	Inner_Membrane	{'O': 'Cytoplasmic', 'N': 'Periplasmic_C'}	OPM	Uniprot_Passed	Pass	Pass
AF-P45762-F1-model_v2	Inner_Membrane	{'O': 'Periplasmic_C', 'N': 'Cytoplasmic'}	OPM	Uniprot_Failed
P15993_9_448_5oqt	Inner_Membrane	{'O': 'Periplasmic_C', 'N': 'Cytoplasmic'}	OPM	Uniprot_Passed	Pass	Pass
ABC-10-CPLX_AlphaMulti	Inner_Membrane	{'O': 'Cytoplasmic', 'N': 'Periplasmic_C'}	OPM	Uniprot_Failed	Exists	Pass
AF-P0AF73-F1-model_v2	Inner_Membrane	{u'O': u'IM_1', u'N': u'IM_2'}	OPM	Manually
P09348_124_253_5zfp	Inner_Membrane	{'O': 'Periplasmic_C', 'N': 'Cytoplasmic'}	OPM	Uniprot_Passed	Pass	Pass
AF-P64445-F1-model_v2	Inner_Membrane	{u'O': u'IM_1', u'N': u'IM_2'}	OPM	Manually
AF-P76170-F1-model_v2	Inner_Membrane	{u'O': u'Periplasmic_C', u'N': u'Cytoplasmic'}	OPM	Manually
P0AEB5_76_336_2oau	Inner_Membrane	{'O': 'Cytoplasmic', 'N': 'Periplasmic_C'}	OPM	Uniprot_Failed	Exists	Pass
AF-P37626-F1-model_v2	Inner_Membrane	{u'O': u'Periplasmic_C', u'N': u'Cytoplasmic'}	OPM	Manually
AF-P65298-F1-model_v2	Inner_Membrane	{u'O': u'IM_1', u'N': u'IM_2'}	OPM	Manually
AF-P0AD30-F1-model_v2	Inner_Membrane	{'O': 'Periplasmic_C', 'N': 'Cytoplasmic'}	OPM	Uniprot_Failed	Exists	Pass
AF-Q7DFV3-F1-model_v2	Inner_Membrane	{u'O': u'IM_1', u'N': u'IM_2'}	OPM	Manually
AF-P77285-F1-model_v2	Inner_Membrane	{u'O': u'Periplasmic_C', u'N': u'Cytoplasmic'}	OPM	Manually
6iqq-assembly1	Inner_Membrane	{u'O': u'IM_1', u'N': u'IM_2'}	OPM	Manually
AF-P0AAZ0-F1-model_v2	Inner_Membrane	{'O': 'Periplasmic_C', 'N': 'Cytoplasmic'}	OPM	Uniprot_Passed	Pass	Pass
ENVZ-CPLX_AlphaMulti	Inner_Membrane	{'O': 'Periplasmic_C', 'N': 'Cytoplasmic'}	OPM	Uniprot_Passed	Pass	Pass
AF-P37642-F1-model_v2	Inner_Membrane	{'O': 'Periplasmic_C', 'N': 'Cytoplasmic'}	OPM	Uniprot_Failed	Exists	Pass
AF-P45848-F1-model_v2	Inner_Membrane	{u'O': u'Cytoplasmic', u'N': u'Periplasmic_C'}	OPM	Manually		Exists
YDEE_ECOLI_model1_clean_residues_removed	Inner_Membrane	{u'O': u'IM_1', u'N': u'IM_2'}	OPM	Manually	Pass	Pass
P0AAE0_17_465_5oqt	Inner_Membrane	{'O': 'Periplasmic_C', 'N': 'Cytoplasmic'}	OPM	Uniprot_Passed	Pass	Pass
AF-P0AEA5-F1-model_v2	Inner_Membrane	{'O': 'Periplasmic_C', 'N': 'Cytoplasmic'}	OPM	Uniprot_Failed	Exists	Exists
AF-P0ADL6-F1-model_v2	Inner_Membrane	{'O': 'Cytoplasmic', 'N': 'Periplasmic_C'}	OPM	Uniprot_Passed	Pass	Exists
AF-P0ADR2-F1-model_v2	Inner_Membrane	{'O': 'Periplasmic_C', 'N': 'Cytoplasmic'}	OPM	Uniprot_Failed	Exists	Exists
P33021_1_416_5l26	Inner_Membrane	{'O': 'Cytoplasmic', 'N': 'Periplasmic_C'}	OPM	Uniprot_Passed	Pass	Pass
AF-P63183-F1-model_v2	Inner_Membrane	{'O': 'Periplasmic_C', 'N': 'Cytoplasmic'}	OPM	Uniprot_Passed	Pass	Pass
AF-P32715-F1-model_v2	Inner_Membrane	{u'O': u'Cytoplasmic', u'N': u'Periplasmic_C'}	OPM	Manually	Pass	Pass
7z7v-assembly1	Inner_Membrane	{'O': 'Periplasmic_C', 'N': 'Cytoplasmic'}	OPM	Uniprot_Passed	Pass	Pass
P0AAC4_14_231_4pgs	Inner_Membrane	{'O': 'Cytoplasmic', 'N': 'Periplasmic_C'}	OPM	Uniprot_Passed	Pass	Pass
AF-P37340-F1-model_v2	Inner_Membrane	{'O': 'Periplasmic_C', 'N': 'Cytoplasmic'}	OPM	Uniprot_Passed	Pass	Exists
AF-P0ABM9-F1-model_v2	Inner_Membrane	{'O': 'Cytoplasmic', 'N': 'Periplasmic_C'}	OPM	Uniprot_Failed
AF-P0AAI3-F1-model_v2	Inner_Membrane	{'O': 'Periplasmic_C', 'N': 'Cytoplasmic'}	OPM	Uniprot_Failed
2zup-assembly1	Inner_Membrane	{'O': 'Periplasmic_C', 'N': 'Cytoplasmic'}	OPM	Uniprot_Passed	Pass
AF-P02942-F1-model_v2	Inner_Membrane	{'O': 'Periplasmic_C', 'N': 'Cytoplasmic'}	OPM	Uniprot_Failed
AF-P0AAE8-F1-model_v2	Inner_Membrane	{'O': 'Periplasmic_C', 'N': 'Cytoplasmic'}	OPM	Uniprot_Failed	Exists	Pass
AF-P39382-F1-model_v2	Inner_Membrane	{u'O': u'Periplasmic_C', u'N': u'Cytoplasmic'}	OPM	Manually
ABC-41-CPLX_AlphaMulti	Inner_Membrane	{'O': 'Periplasmic_C', 'N': 'Cytoplasmic'}	OPM	Uniprot_Failed	Exists	Pass
AF-P0ADK4-F1-model_v2	Inner_Membrane	{'O': 'Cytoplasmic', 'N': 'Periplasmic_C'}	OPM	Uniprot_Failed		Exists
AF-P31064-F1-model_v2	Inner_Membrane	{'O': 'Periplasmic_C', 'N': 'Cytoplasmic'}	OPM	Uniprot_Failed	Exists	Pass
AF-P76343-F1-model_v2	Inner_Membrane	{'O': 'Periplasmic_C', 'N': 'Cytoplasmic'}	OPM	Uniprot_Passed	Pass	Pass
AF-P09348-F1-model_v2	Inner_Membrane	{'O': 'Periplasmic_C', 'N': 'Cytoplasmic'}	OPM	Uniprot_Failed	Exists	Pass
AF-P67127-F1-model_v2	Inner_Membrane	{'O': 'Cytoplasmic', 'N': 'Periplasmic_C'}	OPM	Uniprot_Failed	Exists	Pass
AF-P0AA53-F1-model_v2	Inner_Membrane	{'O': 'Cytoplasmic', 'N': 'Periplasmic_C'}	OPM	Uniprot_Failed
AF-Q46790-F1-model_v2	Inner_Membrane	{u'O': u'Periplasmic_C', u'N': u'Cytoplasmic'}	OPM	Manually
ZITB_ECOLI_model1_clean_residues_removed	Inner_Membrane	{'O': 'Cytoplasmic', 'N': 'Periplasmic_C'}	OPM	Uniprot_Failed	Exists	Pass
AF-P0AA86-F1-model_v2	Inner_Membrane	{'O': 'Periplasmic_C', 'N': 'Cytoplasmic'}	OPM	Uniprot_Failed
AF-P0DPN4-F1-model_v2	Inner_Membrane	{u'O': u'IM_1', u'N': u'IM_2'}	OPM	Manually
7z0s-assembly1	Inner_Membrane	{'O': 'Periplasmic_C', 'N': 'Cytoplasmic'}	OPM	Uniprot_Passed	Pass	Pass
AF-P21365-F1-model_v2	Inner_Membrane	{'O': 'Periplasmic_C', 'N': 'Cytoplasmic'}	OPM	Uniprot_Failed	Exists	Exists
AF-P37197-F1-model_v2	Inner_Membrane	{u'O': u'Periplasmic_C', u'N': u'Cytoplasmic'}	OPM	Manually
YEAV-MONOMER_AlphaMulti	Inner_Membrane	{u'O': u'Periplasmic_C', u'N': u'Cytoplasmic'}	OPM	Manually	Pass	Pass
FOCB-MONOMER_AlphaMulti	Inner_Membrane	{'O': 'Periplasmic_C', 'N': 'Cytoplasmic'}	OPM	Uniprot_Passed	Pass	Pass
ABC-62-CPLX_AlphaMulti	Inner_Membrane	{u'O': u'Periplasmic_C', u'N': u'Cytoplasmic'}	OPM	Manually	Pass	Exists
AF-P28306-F1-model_v2	Inner_Membrane	{'O': 'Periplasmic_C', 'N': 'Cytoplasmic'}	OPM	Uniprot_Failed
YJHB_ECOLI_model1_clean_residues_removed	Inner_Membrane	{'O': 'Periplasmic_C', 'N': 'Cytoplasmic'}	OPM	Uniprot_Passed	Pass	Pass
AF-P77237-F1-model_v2	Inner_Membrane	{u'O': u'IM_1', u'N': u'IM_2'}	OPM	Manually
CPLX0-7_AlphaMulti	Inner_Membrane	{'O': 'Periplasmic_C', 'N': 'Cytoplasmic'}	OPM	Uniprot_Failed	Exists	Exists
YIHP_ECOLI_model1_clean_residues_removed	Inner_Membrane	{'O': 'Periplasmic_C', 'N': 'Cytoplasmic'}	OPM	Uniprot_Passed	Pass	Pass
b1475_1__b1474_1__b1476_1__AlphaMulti	Inner_Membrane	{'O': 'Cytoplasmic', 'N': 'Periplasmic_C'}	OPM	Uniprot_Passed	Pass	Pass
AF-P15877-F1-model_v2	Inner_Membrane	{'O': 'Periplasmic_C', 'N': 'Cytoplasmic'}	OPM	Uniprot_Passed	Pass	Pass
AF-P76507-F1-model_v2	Inner_Membrane	{u'O': u'Periplasmic_C', u'N': u'Cytoplasmic'}	OPM	Manually	Exists	Pass
AF-P11286-F1-model_v2	Inner_Membrane	{'O': 'Periplasmic_C', 'N': 'Cytoplasmic'}	OPM	Uniprot_Failed	Exists	Exists
ABC-12-CPLX_AlphaMulti	Inner_Membrane	{'O': 'Cytoplasmic', 'N': 'Periplasmic_C'}	OPM	Uniprot_Passed	Pass	Pass
AF-P0ACW4-F1-model_v2	Inner_Membrane	{u'O': u'Periplasmic_C', u'N': u'Cytoplasmic'}	OPM	Manually
AF-P30844-F1-model_v2	Inner_Membrane	{'O': 'Periplasmic_C', 'N': 'Cytoplasmic'}	OPM	Uniprot_Failed
AF-P37630-F1-model_v2	Inner_Membrane	{'O': 'Periplasmic_C', 'N': 'Cytoplasmic'}	OPM	Uniprot_Passed	Pass	Pass
ABC-29-CPLX_AlphaMulti	Inner_Membrane	{'O': 'Periplasmic_C', 'N': 'Cytoplasmic'}	OPM	Uniprot_Passed	Pass	Pass
AF-P37665-F1-model_v2	Inner_Membrane	{u'O': u'Periplasmic_C', u'N': u'Cytoplasmic'}	OPM	Manually
P0AA80_14_439_6e9n	Inner_Membrane	{'O': 'Periplasmic_C', 'N': 'Cytoplasmic'}	OPM	Uniprot_Passed	Pass	Pass
AF-P64585-F1-model_v2	Inner_Membrane	{'O': 'Periplasmic_C', 'N': 'Cytoplasmic'}	OPM	Uniprot_Failed
7dma-assembly1	Inner_Membrane	{u'O': u'IM_1', u'N': u'IM_2'}	OPM	Manually
AF-P0ADL1-F1-model_v2	Inner_Membrane	{'O': 'Periplasmic_C', 'N': 'Cytoplasmic'}	OPM	Uniprot_Passed	Pass	Pass
AF-P75747-F1-model_v2	Inner_Membrane	{u'O': u'IM_1', u'N': u'IM_2'}	OPM	Manually	Exists	Pass
AF-P0ADD5-F1-model_v2	Inner_Membrane	{'O': 'Cytoplasmic', 'N': 'Periplasmic_C'}	OPM	Uniprot_Failed	Exists	Exists
AF-P69428-F1-model_v2	Inner_Membrane	{u'O': u'IM_1', u'N': u'IM_2'}	OPM	Manually
AF-P0ADB4-F1-model_v2	Inner_Membrane	{u'O': u'IM_1', u'N': u'IM_2'}	OPM	Manually
7zrd-assembly1	Inner_Membrane	{'O': 'Cytoplasmic', 'N': 'Periplasmic_C'}	OPM	Uniprot_Passed	Pass	Exists
AF-P0AA95-F1-model_v2	Inner_Membrane	{u'O': u'Periplasmic_C', u'N': u'Cytoplasmic'}	OPM	Manually
YEGT_ECOLI_model1_clean_residues_removed	Inner_Membrane	{'O': 'Cytoplasmic', 'N': 'Periplasmic_C'}	OPM	Uniprot_Failed	Exists	Pass
AF-P76182-F1-model_v2	Inner_Membrane	{u'O': u'IM_1', u'N': u'IM_2'}	OPM	Manually	Exists	Pass
AF-P39385-F1-model_v2	Inner_Membrane	{u'O': u'IM_1', u'N': u'IM_2'}	OPM	Manually	Exists	Exists
AF-P37748-F1-model_v2	Inner_Membrane	{u'O': u'IM_1', u'N': u'IM_2'}	OPM	Manually	Exists	Pass
5w8n-assembly1	Inner_Membrane	{u'O': u'IM_1', u'N': u'IM_2'}	OPM	Manually
AF-P27125-F1-model_v2	Inner_Membrane	{'O': 'Cytoplasmic', 'N': 'Periplasmic_C'}	OPM	Uniprot_Passed	Pass	Pass
AF-P0AEC5-F1-model_v2	Inner_Membrane	{'O': 'Periplasmic_C', 'N': 'Cytoplasmic'}	OPM	Uniprot_Failed
AF-P08555-F1-model_v2	Inner_Membrane	{'O': 'Cytoplasmic', 'N': 'Periplasmic_C'}	OPM	Uniprot_Failed	Exists	Pass
AF-P76011-F1-model_v2	Inner_Membrane	{u'O': u'IM_1', u'N': u'IM_2'}	OPM	Manually	Exists	Pass
AF-P0AFI9-F1-model_v2	Inner_Membrane	{u'O': u'IM_1', u'N': u'IM_2'}	OPM	Manually	Exists	Exists
ABC-304-CPLX_AlphaMulti	Inner_Membrane	{'O': 'Cytoplasmic', 'N': 'Periplasmic_C'}	OPM	Uniprot_Passed	Pass	Pass
P0ABG7_15_364_6bar	Inner_Membrane	{'O': 'Periplasmic_C', 'N': 'Cytoplasmic'}	OPM	Uniprot_Failed	Exists	Pass
AF-P76460-F1-model_v2	Inner_Membrane	{'O': 'Cytoplasmic', 'N': 'Periplasmic_C'}	OPM	Uniprot_Failed	Exists	Exists
AF-P0AB35-F1-model_v2	Inner_Membrane	{u'O': u'Cytoplasmic', u'N': u'Periplasmic_C'}	OPM	Manually
AF-P15081-F1-model_v2	Inner_Membrane	{u'O': u'Periplasmic_C', u'N': u'Cytoplasmic'}	OPM	Manually
CPLX0-7627_AlphaMulti	Inner_Membrane	{'O': 'Periplasmic_C', 'N': 'Cytoplasmic'}	OPM	Uniprot_Passed	Pass	Pass
AF-P64545-F1-model_v2	Inner_Membrane	{u'O': u'IM_1', u'N': u'IM_2'}	OPM	Manually
AF-P41036-F1-model_v2	Inner_Membrane	{'O': 'Periplasmic_C', 'N': 'Cytoplasmic'}	OPM	Uniprot_Failed	Exists	Pass
AF-P42905-F1-model_v2	Inner_Membrane	{'O': 'Cytoplasmic', 'N': 'Periplasmic_C'}	OPM	Uniprot_Failed	Exists	Exists
UHPC_ECOLI_model1_clean_residues_removed	Inner_Membrane	{'O': 'Periplasmic_C', 'N': 'Cytoplasmic'}	OPM	Uniprot_Failed	Exists	Pass
AF-P45761-F1-model_v2	Inner_Membrane	{u'O': u'Periplasmic_C', u'N': u'Cytoplasmic'}	OPM	Manually
P0ABE5_2_175_5oc0	Inner_Membrane	{u'O': u'IM_1', u'N': u'IM_2'}	Uniprot	Manually	Pass	Pass
Q46916_16_441_6e9n	Inner_Membrane	{'O': 'Periplasmic_C', 'N': 'Cytoplasmic'}	OPM	Uniprot_Failed	Exists	Pass
ABC-46-CPLX_AlphaMulti	Inner_Membrane	{'O': 'Cytoplasmic', 'N': 'Periplasmic_C'}	OPM	Uniprot_Failed	Exists	Pass
1c99-assembly1	Inner_Membrane	{'O': 'Cytoplasmic', 'N': 'Periplasmic_C'}	OPM	Uniprot_Failed
AF-P37669-F1-model_v2	Inner_Membrane	{'O': 'Periplasmic_C', 'N': 'Cytoplasmic'}	OPM	Uniprot_Passed	Pass	Pass
SecYE-CPLX_AlphaMulti	Inner_Membrane	{'O': 'Periplasmic_C', 'N': 'Cytoplasmic'}	OPM	Uniprot_Passed	Pass	Pass
AF-P0ABH4-F1-model_v2	Inner_Membrane	{'O': 'Periplasmic_C', 'N': 'Cytoplasmic'}	OPM	Uniprot_Failed	Exists	Exists
FDHF_ECOLI_model1_clean_residues_removed	Inner_Membrane	{u'O': u'Cytoplasmic', u'N': u'Periplasmic_C'}	OPM	Manually
AF-P32701-F1-model_v2	Inner_Membrane	{u'O': u'Periplasmic_C', u'N': u'Cytoplasmic'}	OPM	Manually
CPLX0-8125_AlphaMulti	Inner_Membrane	{'O': 'Periplasmic_C', 'N': 'Cytoplasmic'}	OPM	Uniprot_Failed	Exists	Pass
ABC-26-CPLX_AlphaMulti	Inner_Membrane	{'O': 'Cytoplasmic', 'N': 'Periplasmic_C'}	OPM	Uniprot_Failed	Exists	Pass
AF-P76208-F1-model_v2	Inner_Membrane	{u'O': u'IM_1', u'N': u'IM_2'}	OPM	Manually	Exists	Exists
AF-P52599-F1-model_v2	Inner_Membrane	{'O': 'Periplasmic_C', 'N': 'Cytoplasmic'}	OPM	Uniprot_Failed
CPLX-168_AlphaMulti	Inner_Membrane	{'O': 'Periplasmic_C', 'N': 'Cytoplasmic'}	OPM	Uniprot_Failed	Exists	Pass
P77293_1_304_5ekp	Inner_Membrane	{'O': 'Periplasmic_C', 'N': 'Cytoplasmic'}	OPM	Uniprot_Passed	Pass	Pass
6kki-assembly1	Inner_Membrane	{'O': 'Periplasmic_C', 'N': 'Cytoplasmic'}	OPM	Uniprot_Passed	Pass	Pass
YBAL_ECOLI_model1_clean_residues_removed	Inner_Membrane	{'O': 'Cytoplasmic', 'N': 'Periplasmic_C'}	OPM	Uniprot_Failed	Exists	Exists
NARQ-CPLX_AlphaMulti	Inner_Membrane	{'O': 'Periplasmic_C', 'N': 'Cytoplasmic'}	OPM	Uniprot_Passed	Pass	Pass
AF-P0AFL3-F1-model_v2	Inner_Membrane	{u'O': u'Periplasmic_C', u'N': u'Cytoplasmic'}	OPM	Manually
AF-P45537-F1-model_v2	Inner_Membrane	{u'O': u'Cytoplasmic', u'N': u'Periplasmic_C'}	OPM	Manually	Exists	Pass
CPLX-165_AlphaMulti	Inner_Membrane	{'O': 'Periplasmic_C', 'N': 'Cytoplasmic'}	OPM	Uniprot_Passed	Pass	Pass
CPLX0-7819_AlphaMulti	Inner_Membrane	{'O': 'Cytoplasmic', 'N': 'Periplasmic_C'}	OPM	Uniprot_Passed	Pass	Pass
P64423_1_327_5n9y	Inner_Membrane	{'O': 'Periplasmic_C', 'N': 'Cytoplasmic'}	OPM	Uniprot_Passed	Pass	Pass
AF-P77306-F1-model_v2	Inner_Membrane	{'O': 'Cytoplasmic', 'N': 'Periplasmic_C'}	OPM	Uniprot_Failed
AF-O32528-F1-model_v2	Inner_Membrane	{u'O': u'IM_1', u'N': u'IM_2'}	OPM	Manually
AF-P08372-F1-model_v2	Inner_Membrane	{u'O': u'Periplasmic_C', u'N': u'Cytoplasmic'}	OPM	Manually
AF-P77249-F1-model_v2	Inner_Membrane	{u'O': u'Periplasmic_C', u'N': u'Cytoplasmic'}	OPM	Manually
AF-P0AAD4-F1-model_v2	Inner_Membrane	{'O': 'Periplasmic_C', 'N': 'Cytoplasmic'}	OPM	Uniprot_Passed	Pass	Pass
P0ABC9_12_508_2wit	Inner_Membrane	{u'O': u'IM_1', u'N': u'IM_2'}	OPM	Manually	Pass	Pass
AF-P23173-F1-model_v2	Inner_Membrane	{'O': 'Periplasmic_C', 'N': 'Cytoplasmic'}	OPM	Uniprot_Passed	Pass	Pass
AF-P0A6H8-F1-model_v2	Inner_Membrane	{u'O': u'Cytoplasmic', u'N': u'Periplasmic_C'}	OPM	Manually		Exists
AF-P0A843-F1-model_v2	Inner_Membrane	{u'O': u'IM_1', u'N': u'IM_2'}	OPM	Manually
KDPD-CPLX_AlphaMulti	Inner_Membrane	{'O': 'Periplasmic_C', 'N': 'Cytoplasmic'}	OPM	Uniprot_Failed	Exists	Exists
AF-P0A8T5-F1-model_v2	Inner_Membrane	{u'O': u'IM_1', u'N': u'IM_2'}	OPM	Manually
AF-P33668-F1-model_v2	Inner_Membrane	{u'O': u'Periplasmic_C', u'N': u'Cytoplasmic'}	OPM	Manually
ABC-64-CPLX_AlphaMulti	Inner_Membrane	{u'O': u'Periplasmic_C', u'N': u'Cytoplasmic'}	OPM	Manually	Exists	Pass
AF-P46187-F1-model_v2	Inner_Membrane	{'O': 'Periplasmic_C', 'N': 'Cytoplasmic'}	OPM	Uniprot_Failed
AF-C1P609-F1-model_v2	Inner_Membrane	{u'O': u'IM_1', u'N': u'IM_2'}	OPM	Manually
AF-P0AG38-F1-model_v2	Inner_Membrane	{'O': 'Periplasmic_C', 'N': 'Cytoplasmic'}	OPM	Uniprot_Failed	Exists	Pass
AF-P42601-F1-model_v2	Inner_Membrane	{'O': 'Cytoplasmic', 'N': 'Periplasmic_C'}	OPM	Uniprot_Failed	Exists	Pass
AF-P75995-F1-model_v2	Inner_Membrane	{u'O': u'Periplasmic_C', u'N': u'Cytoplasmic'}	OPM	Manually
AF-P37908-F1-model_v2	Inner_Membrane	{'O': 'Cytoplasmic', 'N': 'Periplasmic_C'}	OPM	Uniprot_Failed	Exists	Exists
AF-P13518-F1-model_v2	Inner_Membrane	{u'O': u'Periplasmic_C', u'N': u'Cytoplasmic'}	OPM	Manually
AF-P0AG34-F1-model_v2	Inner_Membrane	{u'O': u'IM_1', u'N': u'IM_2'}	OPM	Manually	Pass	Exists
YNJA_ECOLI_model1_clean_residues_removed	Inner_Membrane	{u'O': u'IM_1', u'N': u'IM_2'}	OPM	Manually
AF-P0ADC3-F1-model_v2	Inner_Membrane	{u'O': u'Periplasmic_C', u'N': u'Cytoplasmic'}	OPM	Manually	Exists	Exists
ABC-25-CPLX_AlphaMulti	Inner_Membrane	{'O': 'Periplasmic_C', 'N': 'Cytoplasmic'}	OPM	Uniprot_Passed	Pass	Pass
ABC-55-CPLX_AlphaMulti	Inner_Membrane	{'O': 'Cytoplasmic', 'N': 'Periplasmic_C'}	OPM	Uniprot_Failed	Exists	Pass
AF-P17334-F1-model_v2	Inner_Membrane	{'O': 'Periplasmic_C', 'N': 'Cytoplasmic'}	OPM	Uniprot_Failed	Exists	Exists
P0AC23_29_280_3kcv	Inner_Membrane	{'O': 'Periplasmic_C', 'N': 'Cytoplasmic'}	OPM	Uniprot_Passed	Pass	Pass
NITRATREDUCTZ-CPLX_AlphaMulti	Inner_Membrane	{'O': 'Periplasmic_C', 'N': 'Cytoplasmic'}	OPM	Uniprot_Failed	Exists	Pass
AF-P18200-F1-model_v2	Inner_Membrane	{'O': 'Periplasmic_C', 'N': 'Cytoplasmic'}	OPM	Uniprot_Failed	Exists	Pass
P07117_2_480_5nv9	Inner_Membrane	{'O': 'Cytoplasmic', 'N': 'Periplasmic_C'}	OPM	Uniprot_Failed	Exists	Pass
AF-P39401-F1-model_v2	Inner_Membrane	{u'O': u'Cytoplasmic', u'N': u'Periplasmic_C'}	OPM	Manually	Pass	Exists
AF-P0A8D9-F1-model_v2	Inner_Membrane	{'O': 'Periplasmic_C', 'N': 'Cytoplasmic'}	OPM	Uniprot_Failed
AF-P39282-F1-model_v2	Inner_Membrane	{'O': 'Periplasmic_C', 'N': 'Cytoplasmic'}	OPM	Uniprot_Passed	Pass	Pass
AF-P08550-F1-model_v2	Inner_Membrane	{'O': 'Cytoplasmic', 'N': 'Periplasmic_C'}	OPM	Uniprot_Passed	Pass	Exists
FDNI_ECOLI_model1_clean_residues_removed	Inner_Membrane	{'O': 'Periplasmic_C', 'N': 'Cytoplasmic'}	OPM	Uniprot_Passed	Pass	Pass
2gfp-assembly1	Inner_Membrane	{'O': 'Periplasmic_C', 'N': 'Cytoplasmic'}	OPM	Uniprot_Passed	Pass	Pass
P69681_25_408_2npd	Inner_Membrane	{'O': 'Cytoplasmic', 'N': 'Periplasmic_C'}	OPM	Uniprot_Passed	Pass	Pass
P64634_1_173_3jc8	Inner_Membrane	{u'O': u'Periplasmic_C', u'N': u'Cytoplasmic'}	OPM	Manually
AF-P23482-F1-model_v2	Inner_Membrane	{'O': 'Cytoplasmic', 'N': 'Periplasmic_C'}	OPM	Uniprot_Failed	Exists	Pass
P0AA76_12_428_6e9n	Inner_Membrane	{'O': 'Periplasmic_C', 'N': 'Cytoplasmic'}	OPM	Uniprot_Failed	Exists	Pass
YICJ_ECOLI_model1_clean_residues_removed	Inner_Membrane	{'O': 'Cytoplasmic', 'N': 'Periplasmic_C'}	OPM	Uniprot_Failed	Exists	Pass
FORMHYDROG2-CPLX_AlphaMulti	Inner_Membrane	{'O': 'Cytoplasmic', 'N': 'Periplasmic_C'}	OPM	Uniprot_Failed	Exists	Pass
5dn6-assembly1	Inner_Membrane	{'O': 'Cytoplasmic', 'N': 'Periplasmic_C'}	OPM	Uniprot_Failed
7w6x-assembly1	Inner_Membrane	{'O': 'Periplasmic_C', 'N': 'Cytoplasmic'}	OPM	Uniprot_Failed		Pass
AF-P32672-F1-model_v2	Inner_Membrane	{u'O': u'IM_1', u'N': u'IM_2'}	OPM	Manually	Exists	Pass
P19642_14_431_5iws	Inner_Membrane	{u'O': u'Periplasmic_C', u'N': u'Cytoplasmic'}	OPM	Manually	Exists	Pass
AF-P36647-F1-model_v2	Inner_Membrane	{u'O': u'Periplasmic_C', u'N': u'Cytoplasmic'}	OPM	Manually
AF-P77494-F1-model_v2	Inner_Membrane	{u'O': u'IM_1', u'N': u'IM_2'}	OPM	Manually
AF-P0ADV7-F1-model_v2	Inner_Membrane	{u'O': u'Periplasmic_C', u'N': u'Cytoplasmic'}	OPM	Manually
6j5i-assembly1	Inner_Membrane	{u'O': u'Periplasmic_C', u'N': u'Cytoplasmic'}	OPM	Manually
AF-P36655-F1-model_v2	Inner_Membrane	{'O': 'Cytoplasmic', 'N': 'Periplasmic_C'}	OPM	Uniprot_Passed	Pass	Pass
AF-P77263-F1-model_v2	Inner_Membrane	{u'O': u'Periplasmic_C', u'N': u'Cytoplasmic'}	OPM	Manually
4dx5-assembly1	Inner_Membrane	{u'O': u'Periplasmic_C', u'N': u'Cytoplasmic'}	OPM	Manually
AF-P39314-F1-model_v2	Inner_Membrane	{'O': 'Periplasmic_C', 'N': 'Cytoplasmic'}	OPM	Uniprot_Passed	Pass	Pass
AF-P77228-F1-model_v2	Inner_Membrane	{'O': 'Cytoplasmic', 'N': 'Periplasmic_C'}	OPM	Uniprot_Failed	Exists	Pass
AF-Q46831-F1-model_v2	Inner_Membrane	{u'O': u'IM_1', u'N': u'IM_2'}	OPM	Manually	Exists	Exists
AF-P67553-F1-model_v2	Inner_Membrane	{u'O': u'Cytoplasmic', u'N': u'Periplasmic_C'}	OPM	Manually
AF-P45566-F1-model_v2	Inner_Membrane	{u'O': u'IM_1', u'N': u'IM_2'}	OPM	Manually
AF-P22586-F1-model_v2	Inner_Membrane	{u'O': u'Cytoplasmic', u'N': u'Periplasmic_C'}	OPM	Manually
b3240_3__AlphaMulti	Inner_Membrane	{'O': 'Cytoplasmic', 'N': 'Periplasmic_C'}	OPM	Uniprot_Failed	Exists	Pass
AF-P0AAA5-F1-model_v2	Inner_Membrane	{u'O': u'IM_1', u'N': u'IM_2'}	OPM	Manually
AF-P64564-F1-model_v2	Inner_Membrane	{u'O': u'IM_1', u'N': u'IM_2'}	OPM	Manually	Exists	Exists
DJLC_ECOLI_model1_clean_residues_removed	Inner_Membrane	{u'O': u'Periplasmic_C', u'N': u'Cytoplasmic'}	OPM	Manually
CPLX0-7642_AlphaMulti	Inner_Membrane	{'O': 'Periplasmic_C', 'N': 'Cytoplasmic'}	OPM	Uniprot_Passed	Pass	Pass
ABC-63-CPLX_AlphaMulti	Inner_Membrane	{'O': 'Cytoplasmic', 'N': 'Periplasmic_C'}	OPM	Uniprot_Passed	Pass	Pass
AF-P0AFK2-F1-model_v2	Inner_Membrane	{'O': 'Periplasmic_C', 'N': 'Cytoplasmic'}	OPM	Uniprot_Failed	Exists	Pass
AF-P0AFV8-F1-model_v2	Inner_Membrane	{u'O': u'IM_1', u'N': u'IM_2'}	OPM	Manually
AF-P0AAA1-F1-model_v2	Inner_Membrane	{'O': 'Cytoplasmic', 'N': 'Periplasmic_C'}	OPM	Uniprot_Failed	Exists	Exists
5lbj-assembly1	Inner_Membrane	{u'O': u'IM_1', u'N': u'IM_2'}	OPM	Manually
AF-P0AEC8-F1-model_v2	Inner_Membrane	{'O': 'Periplasmic_C', 'N': 'Cytoplasmic'}	OPM	Uniprot_Failed
1nek-assembly1	Inner_Membrane	{'O': 'Periplasmic_C', 'N': 'Cytoplasmic'}	OPM	Uniprot_Failed	Exists	Pass
IGAA_ECOLI_model1_clean_residues_removed	Inner_Membrane	{'O': 'Periplasmic_C', 'N': 'Cytoplasmic'}	OPM	Uniprot_Failed	Exists	Exists
AF-P0DPO4-F1-model_v2	Inner_Membrane	{u'O': u'IM_1', u'N': u'IM_2'}	OPM	Manually
AF-P39836-F1-model_v2	Inner_Membrane	{u'O': u'IM_1', u'N': u'IM_2'}	OPM	Manually		Pass
P0AAW9_1_46_4c48	Inner_Membrane	{'O': 'Cytoplasmic', 'N': 'Periplasmic_C'}	OPM	Uniprot_Failed
AF-P0AG00-F1-model_v2	Inner_Membrane	{'O': 'Periplasmic_C', 'N': 'Cytoplasmic'}	OPM	Uniprot_Failed
AF-P0DMC5-F1-model_v2	Inner_Membrane	{'O': 'Periplasmic_C', 'N': 'Cytoplasmic'}	OPM	Uniprot_Failed
AF-P62723-F1-model_v2	Inner_Membrane	{'O': 'Periplasmic_C', 'N': 'Cytoplasmic'}	OPM	Uniprot_Failed	Exists	Pass
b2367_3__AlphaMulti	Inner_Membrane	{'O': 'Cytoplasmic', 'N': 'Periplasmic_C'}	OPM	Uniprot_Passed	Pass	Pass
AF-P77409-F1-model_v2	Inner_Membrane	{u'O': u'IM_1', u'N': u'IM_2'}	OPM	Manually	Exists	Pass
AF-P0AB49-F1-model_v2	Inner_Membrane	{u'O': u'IM_1', u'N': u'IM_2'}	OPM	Manually
CPLX0-7870_AlphaMulti	Inner_Membrane	{'O': 'Periplasmic_C', 'N': 'Cytoplasmic'}	OPM	Uniprot_Passed	Pass	Pass
b4355_2__AlphaMulti	Inner_Membrane	{'O': 'Periplasmic_C', 'N': 'Cytoplasmic'}	OPM	Uniprot_Failed	Exists	Pass
AF-P76506-F1-model_v2	Inner_Membrane	{u'O': u'Cytoplasmic', u'N': u'Periplasmic_C'}	OPM	Manually
b0409_1__b0408_1__b0407_1__AlphaMulti	Inner_Membrane	{'O': 'Periplasmic_C', 'N': 'Cytoplasmic'}	OPM	Uniprot_Passed	Pass	Pass
AF-P0AB01-F1-model_v2	Inner_Membrane	{u'O': u'Cytoplasmic', u'N': u'Periplasmic_C'}	OPM	Manually
Q46832_30_176_3jc9	Inner_Membrane	{'O': 'Periplasmic_C', 'N': 'Cytoplasmic'}	OPM	Uniprot_Failed
AF-P0ABC7-F1-model_v2	Inner_Membrane	{'O': 'Periplasmic_C', 'N': 'Cytoplasmic'}	OPM	Uniprot_Failed
AF-P42914-F1-model_v2	Inner_Membrane	{u'O': u'Periplasmic_C', u'N': u'Cytoplasmic'}	OPM	Manually
AF-C1P602-F1-model_v2	Inner_Membrane	{u'O': u'IM_1', u'N': u'IM_2'}	OPM	Manually
AF-P0ACB7-F1-model_v2	Inner_Membrane	{'O': 'Periplasmic_C', 'N': 'Cytoplasmic'}	OPM	Uniprot_Failed
CPLX-157_AlphaMulti	Inner_Membrane	{'O': 'Periplasmic_C', 'N': 'Cytoplasmic'}	OPM	Uniprot_Failed	Exists	Pass
ABC-60-CPLX_AlphaMulti	Inner_Membrane	{u'O': u'Periplasmic_C', u'N': u'Cytoplasmic'}	OPM	Manually	Pass	Pass
3b5d-assembly1	Inner_Membrane	{u'O': u'IM_1', u'N': u'IM_2'}	OPM	Manually	Exists	Exists
AF-P0AFM9-F1-model_v2	Inner_Membrane	{u'O': u'IM_1', u'N': u'IM_2'}	OPM	Manually
AF-P0AG27-F1-model_v2	Inner_Membrane	{u'O': u'Cytoplasmic', u'N': u'Periplasmic_C'}	OPM	Manually
AF-P45760-F1-model_v2	Inner_Membrane	{u'O': u'Periplasmic_C', u'N': u'Cytoplasmic'}	OPM	Manually
1lkv-assembly2	Inner_Membrane	{u'O': u'IM_1', u'N': u'IM_2'}	OPM	Manually
P0AA70_11_288_5i20	Inner_Membrane	{'O': 'Periplasmic_C', 'N': 'Cytoplasmic'}	OPM	Uniprot_Passed	Pass	Pass
6rbg-assembly1	Inner_Membrane	{'O': 'Periplasmic_C', 'N': 'Cytoplasmic'}	OPM	Uniprot_Passed	Pass	Pass
AF-A5A605-F1-model_v2	Inner_Membrane	{u'O': u'IM_1', u'N': u'IM_2'}	OPM	Manually	Exists	Exists
AF-P76007-F1-model_v2	Inner_Membrane	{u'O': u'IM_1', u'N': u'IM_2'}	OPM	Manually	Pass	Pass
P32166_10_303_4tq3	Inner_Membrane	{'O': 'Periplasmic_C', 'N': 'Cytoplasmic'}	OPM	Uniprot_Passed	Pass	Pass
P64515_3_120_4jrz	Inner_Membrane	{'O': 'Cytoplasmic', 'N': 'Periplasmic_C'}	OPM	Uniprot_Failed		Pass
ABC-58-CPLX_AlphaMulti	Inner_Membrane	{'O': 'Periplasmic_C', 'N': 'Cytoplasmic'}	OPM	Uniprot_Failed	Exists	Pass
AF-P0AD03-F1-model_v2	Inner_Membrane	{'O': 'Periplasmic_C', 'N': 'Cytoplasmic'}	OPM	Uniprot_Failed	Exists	Pass
PHOR-CPLX_AlphaMulti	Inner_Membrane	{'O': 'Periplasmic_C', 'N': 'Cytoplasmic'}	OPM	Uniprot_Failed	Exists	Exists
AF-P0A9R2-F1-model_v2	Inner_Membrane	{u'O': u'IM_1', u'N': u'IM_2'}	OPM	Manually
AF-P0DPO1-F1-model_v2	Inner_Membrane	{u'O': u'IM_1', u'N': u'IM_2'}	OPM	Manually
AF-P23842-F1-model_v2	Inner_Membrane	{u'O': u'Periplasmic_C', u'N': u'Cytoplasmic'}	OPM	Manually	Exists	Pass
MDTG_ECOLI_model1_clean_residues_removed	Inner_Membrane	{u'O': u'IM_1', u'N': u'IM_2'}	OPM	Manually	Exists	Pass
AF-P27243-F1-model_v2	Inner_Membrane	{'O': 'Periplasmic_C', 'N': 'Cytoplasmic'}	OPM	Uniprot_Passed	Pass	Pass
AF-P0AEC0-F1-model_v2	Inner_Membrane	{'O': 'Periplasmic_C', 'N': 'Cytoplasmic'}	OPM	Uniprot_Failed	Exists	Pass
AF-P77616-F1-model_v2	Inner_Membrane	{u'O': u'Periplasmic_C', u'N': u'Cytoplasmic'}	OPM	Manually
b3006_5__b3005_2__AlphaMulti	Inner_Membrane	{'O': 'Cytoplasmic', 'N': 'Periplasmic_C'}	OPM	Uniprot_Passed	Pass	Pass
ABC-15-CPLX_AlphaMulti	Inner_Membrane	{'O': 'Cytoplasmic', 'N': 'Periplasmic_C'}	OPM	Uniprot_Passed	Pass	Pass
AF-P75916-F1-model_v2	Inner_Membrane	{'O': 'Periplasmic_C', 'N': 'Cytoplasmic'}	OPM	Uniprot_Passed	Pass	Pass
AF-P39344-F1-model_v2	Inner_Membrane	{'O': 'Cytoplasmic', 'N': 'Periplasmic_C'}	OPM	Uniprot_Failed	Exists	Exists
AF-P0ADA7-F1-model_v2	Inner_Membrane	{u'O': u'IM_1', u'N': u'IM_2'}	OPM	Manually
AF-P67244-F1-model_v2	Inner_Membrane	{u'O': u'IM_1', u'N': u'IM_2'}	OPM	Manually	Exists	Exists
YNJF_ECOLI_model1_clean_residues_removed	Inner_Membrane	{'O': 'Cytoplasmic', 'N': 'Periplasmic_C'}	OPM	Uniprot_Failed	Exists	Exists
b1886_2__AlphaMulti	Inner_Membrane	{'O': 'Periplasmic_C', 'N': 'Cytoplasmic'}	OPM	Uniprot_Failed	Exists	Pass
METNIQ-METHIONINE-ABC-CPLX_AlphaMulti	Inner_Membrane	{'O': 'Periplasmic_C', 'N': 'Cytoplasmic'}	OPM	Uniprot_Passed	Pass	Pass
FUMARATE-REDUCTASE_AlphaMulti	Inner_Membrane	{'O': 'Periplasmic_C', 'N': 'Cytoplasmic'}	OPM	Uniprot_Passed	Pass	Pass
YEBN_ECOLI_model1_clean_residues_removed	Inner_Membrane	{'O': 'Periplasmic_C', 'N': 'Cytoplasmic'}	OPM	Uniprot_Failed	Exists	Pass
AF-P0AAA7-F1-model_v2	Inner_Membrane	{'O': 'Periplasmic_C', 'N': 'Cytoplasmic'}	OPM	Uniprot_Passed	Pass	Pass
AF-P37660-F1-model_v2	Inner_Membrane	{'O': 'Periplasmic_C', 'N': 'Cytoplasmic'}	OPM	Uniprot_Failed	Exists	Pass
ABC-6-CPLX_AlphaMulti	Inner_Membrane	{u'O': u'Periplasmic_C', u'N': u'Cytoplasmic'}	OPM	Manually	Pass	Pass
YJJL_ECOLI_model1_clean_residues_removed	Inner_Membrane	{'O': 'Cytoplasmic', 'N': 'Periplasmic_C'}	OPM	Uniprot_Failed	Exists	Pass
AF-P36561-F1-model_v2	Inner_Membrane	{u'O': u'IM_1', u'N': u'IM_2'}	OPM	Manually	Pass	Pass
AF-P27842-F1-model_v2	Inner_Membrane	{u'O': u'IM_1', u'N': u'IM_2'}	OPM	Manually
RHMT_ECOLI_model1_clean_residues_removed	Inner_Membrane	{'O': 'Cytoplasmic', 'N': 'Periplasmic_C'}	OPM	Uniprot_Failed	Exists	Pass
AF-P0ADL3-F1-model_v2	Inner_Membrane	{u'O': u'Periplasmic_C', u'N': u'Cytoplasmic'}	OPM	Manually
AF-P75826-F1-model_v2	Inner_Membrane	{u'O': u'Cytoplasmic', u'N': u'Periplasmic_C'}	OPM	Manually	Pass	Exists
AF-P0AA47-F1-model_v2	Inner_Membrane	{'O': 'Periplasmic_C', 'N': 'Cytoplasmic'}	OPM	Uniprot_Passed	Pass	Pass
AF-P0DPN9-F1-model_v2	Inner_Membrane	{u'O': u'IM_1', u'N': u'IM_2'}	OPM	Manually
AF-Q46841-F1-model_v2	Inner_Membrane	{'O': 'Periplasmic_C', 'N': 'Cytoplasmic'}	OPM	Uniprot_Failed	Exists	Exists
AF-P32696-F1-model_v2	Inner_Membrane	{u'O': u'IM_1', u'N': u'IM_2'}	OPM	Manually
ABC-28-CPLX_AlphaMulti	Inner_Membrane	{'O': 'Periplasmic_C', 'N': 'Cytoplasmic'}	OPM	Uniprot_Passed	Pass	Pass
P45394_1_318_5hxc	Inner_Membrane	{'O': 'Cytoplasmic', 'N': 'Periplasmic_C'}	OPM	Uniprot_Failed	Exists	Pass
CPLX0-7934_AlphaMulti	Inner_Membrane	{'O': 'Periplasmic_C', 'N': 'Cytoplasmic'}	OPM	Uniprot_Passed	Pass
P0AC98_5_188_5ys3	Inner_Membrane	{'O': 'Periplasmic_C', 'N': 'Cytoplasmic'}	OPM	Uniprot_Passed	Pass	Pass
3rlf-assembly1	Inner_Membrane	{'O': 'Cytoplasmic', 'N': 'Periplasmic_C'}	OPM	Uniprot_Passed	Pass	Pass
AF-A8DYQ1-F1-model_v2	Inner_Membrane	{u'O': u'IM_1', u'N': u'IM_2'}	OPM	Manually
AF-P11667-F1-model_v2	Inner_Membrane	{'O': 'Cytoplasmic', 'N': 'Periplasmic_C'}	OPM	Uniprot_Passed	Pass	Pass
GLTP-MONOMER_AlphaMulti	Inner_Membrane	{'O': 'Periplasmic_C', 'N': 'Cytoplasmic'}	OPM	Uniprot_Passed	Pass	Pass
AF-P37614-F1-model_v2	Inner_Membrane	{u'O': u'IM_1', u'N': u'IM_2'}	OPM	Manually
AF-P0AAD6-F1-model_v2	Inner_Membrane	{'O': 'Periplasmic_C', 'N': 'Cytoplasmic'}	OPM	Uniprot_Passed	Pass	Pass
ABC-57-CPLX_AlphaMulti	Inner_Membrane	{'O': 'Periplasmic_C', 'N': 'Cytoplasmic'}	OPM	Uniprot_Passed	Pass	Pass
AF-P31446-F1-model_v2	Inner_Membrane	{'O': 'Periplasmic_C', 'N': 'Cytoplasmic'}	OPM	Uniprot_Failed	Exists	Exists
AF-P45468-F1-model_v2	Inner_Membrane	{u'O': u'IM_1', u'N': u'IM_2'}	OPM	Manually	Exists	Exists
AF-P15286-F1-model_v2	Inner_Membrane	{'O': 'Periplasmic_C', 'N': 'Cytoplasmic'}	OPM	Uniprot_Failed
AF-P00803-F1-model_v2	Inner_Membrane	{'O': 'Cytoplasmic', 'N': 'Periplasmic_C'}	OPM	Uniprot_Failed
AF-Q47536-F1-model_v2	Inner_Membrane	{u'O': u'IM_1', u'N': u'IM_2'}	OPM	Manually		Pass
AF-A5A624-F1-model_v2	Inner_Membrane	{u'O': u'IM_1', u'N': u'IM_2'}	OPM	Manually
YOHD_ECOLI_model1_clean_residues_removed	Inner_Membrane	{'O': 'Cytoplasmic', 'N': 'Periplasmic_C'}	OPM	Uniprot_Passed	Pass	Pass
AF-P0AGM9-F1-model_v2	Inner_Membrane	{u'O': u'IM_1', u'N': u'IM_2'}	OPM	Manually	Pass	Pass
AF-P76185-F1-model_v2	Inner_Membrane	{u'O': u'Periplasmic_C', u'N': u'Cytoplasmic'}	OPM	Manually
AF-P0AA93-F1-model_v2	Inner_Membrane	{'O': 'Cytoplasmic', 'N': 'Periplasmic_C'}	OPM	Uniprot_Failed	Exists	Pass
AF-P77437-F1-model_v2	Inner_Membrane	{u'O': u'IM_1', u'N': u'IM_2'}	OPM	Manually	Exists	Pass
CREC-CPLX_AlphaMulti	Inner_Membrane	{'O': 'Periplasmic_C', 'N': 'Cytoplasmic'}	OPM	Uniprot_Failed	Exists	Pass
AF-P64592-F1-model_v2	Inner_Membrane	{'O': 'Cytoplasmic', 'N': 'Periplasmic_C'}	OPM	Uniprot_Failed	Exists	Exists
AF-C1P615-F1-model_v2	Inner_Membrane	{u'O': u'IM_1', u'N': u'IM_2'}	OPM	Manually
P76345_2_176_5oc0	Inner_Membrane	{'O': 'Periplasmic_C', 'N': 'Cytoplasmic'}	OPM	Uniprot_Failed	Exists	Pass
AF-P37327-F1-model_v2	Inner_Membrane	{'O': 'Periplasmic_C', 'N': 'Cytoplasmic'}	OPM	Uniprot_Passed	Pass	Pass
AF-P39835-F1-model_v2	Inner_Membrane	{u'O': u'IM_1', u'N': u'IM_2'}	OPM	Manually	Exists	Exists
AF-P43531-F1-model_v2	Inner_Membrane	{'O': 'Cytoplasmic', 'N': 'Periplasmic_C'}	OPM	Uniprot_Failed	Exists	Pass
AF-P0A8R7-F1-model_v2	Inner_Membrane	{'O': 'Cytoplasmic', 'N': 'Periplasmic_C'}	OPM	Uniprot_Failed	Exists
AF-P37056-F1-model_v2	Inner_Membrane	{u'O': u'Periplasmic_C', u'N': u'Cytoplasmic'}	OPM	Manually
AF-P75962-F1-model_v2	Inner_Membrane	{'O': 'Periplasmic_C', 'N': 'Cytoplasmic'}	OPM	Uniprot_Failed
AF-P76221-F1-model_v2	Inner_Membrane	{'O': 'Periplasmic_C', 'N': 'Cytoplasmic'}	OPM	Uniprot_Failed	Exists	Exists
AF-P77599-F1-model_v2	Inner_Membrane	{u'O': u'Periplasmic_C', u'N': u'Cytoplasmic'}	OPM	Manually
AF-P77416-F1-model_v2	Inner_Membrane	{u'O': u'IM_1', u'N': u'IM_2'}	OPM	Manually	Exists	Pass
AF-P33128-F1-model_v2	Inner_Membrane	{u'O': u'Periplasmic_C', u'N': u'Cytoplasmic'}	OPM	Manually
AF-P32700-F1-model_v2	Inner_Membrane	{u'O': u'IM_1', u'N': u'IM_2'}	OPM	Manually
ABC-23-CPLX_AlphaMulti	Inner_Membrane	{u'O': u'Periplasmic_C', u'N': u'Cytoplasmic'}	OPM	Manually	Exists	Pass
AF-P0ADD2-F1-model_v2	Inner_Membrane	{u'O': u'IM_1', u'N': u'IM_2'}	OPM	Manually	Exists	Exists
AF-P77757-F1-model_v2	Inner_Membrane	{'O': 'Periplasmic_C', 'N': 'Cytoplasmic'}	OPM	Uniprot_Failed
AF-P37305-F1-model_v2	Inner_Membrane	{u'O': u'IM_1', u'N': u'IM_2'}	OPM	Manually
P0A924_1_254_5jwy	Inner_Membrane	{'O': 'Periplasmic_C', 'N': 'Cytoplasmic'}	OPM	Uniprot_Failed	Exists	Exists
AF-P77473-F1-model_v2	Inner_Membrane	{u'O': u'Periplasmic_C', u'N': u'Cytoplasmic'}	OPM	Manually
AF-P76093-F1-model_v2	Inner_Membrane	{u'O': u'IM_1', u'N': u'IM_2'}	OPM	Manually	Exists	Pass
AF-P76576-F1-model_v2	Inner_Membrane	{'O': 'Periplasmic_C', 'N': 'Cytoplasmic'}	OPM	Uniprot_Failed
AF-P0AF40-F1-model_v2	Inner_Membrane	{'O': 'Periplasmic_C', 'N': 'Cytoplasmic'}	OPM	Uniprot_Failed	Exists	Exists
AF-P23849-F1-model_v2	Inner_Membrane	{'O': 'Periplasmic_C', 'N': 'Cytoplasmic'}	OPM	Uniprot_Failed	Exists	Pass
AF-Q59385-F1-model_v2	Inner_Membrane	{'O': 'Periplasmic_C', 'N': 'Cytoplasmic'}	OPM	Uniprot_Failed		Pass
AF-P31680-F1-model_v2	Inner_Membrane	{'O': 'Periplasmic_C', 'N': 'Cytoplasmic'}	OPM	Uniprot_Failed
AF-P69789-F1-model_v2	Inner_Membrane	{u'O': u'Cytoplasmic', u'N': u'Periplasmic_C'}	OPM	Manually
AF-P75770-F1-model_v2	Inner_Membrane	{'O': 'Periplasmic_C', 'N': 'Cytoplasmic'}	OPM	Uniprot_Failed	Exists	Exists
AF-P64622-F1-model_v2	Inner_Membrane	{u'O': u'IM_1', u'N': u'IM_2'}	OPM	Manually
AF-P0AF06-F1-model_v2	Inner_Membrane	{'O': 'Periplasmic_C', 'N': 'Cytoplasmic'}	OPM	Uniprot_Failed
8f4n-assembly1	Inner_Membrane	{u'O': u'Periplasmic_C', u'N': u'Cytoplasmic'}	OPM	Manually	Exists	Pass
P0AGK1_16_288_4od4	Inner_Membrane	{'O': 'Periplasmic_C', 'N': 'Cytoplasmic'}	OPM	Uniprot_Failed	Exists	Pass
AF-P43671-F1-model_v2	Inner_Membrane	{'O': 'Periplasmic_C', 'N': 'Cytoplasmic'}	OPM	Uniprot_Failed
ABC-33-CPLX_AlphaMulti	Inner_Membrane	{'O': 'Periplasmic_C', 'N': 'Cytoplasmic'}	OPM	Uniprot_Passed	Pass	Pass
CPLX-169_AlphaMulti	Inner_Membrane	{'O': 'Periplasmic_C', 'N': 'Cytoplasmic'}	OPM	Uniprot_Failed	Exists	Pass
AF-P75769-F1-model_v2	Inner_Membrane	{u'O': u'IM_1', u'N': u'IM_2'}	OPM	Manually	Pass	Pass
AF-P76299-F1-model_v2	Inner_Membrane	{'O': 'Periplasmic_C', 'N': 'Cytoplasmic'}	OPM	Uniprot_Passed	Pass	Exists
AF-P27434-F1-model_v2	Inner_Membrane	{'O': 'Cytoplasmic', 'N': 'Periplasmic_C'}	OPM	Uniprot_Failed
P37617_126_730_4umv	Inner_Membrane	{'O': 'Periplasmic_C', 'N': 'Cytoplasmic'}	OPM	Uniprot_Failed	Exists	Pass
AF-P77328-F1-model_v2	Inner_Membrane	{'O': 'Cytoplasmic', 'N': 'Periplasmic_C'}	OPM	Uniprot_Failed	Exists	Pass
P0AGM2_2_196_5wuf	Inner_Membrane	{'O': 'Cytoplasmic', 'N': 'Periplasmic_C'}	OPM	Uniprot_Passed	Pass	Pass
AF-P77858-F1-model_v2	Inner_Membrane	{'O': 'Cytoplasmic', 'N': 'Periplasmic_C'}	OPM	Uniprot_Passed	Pass	Pass
AF-P76473-F1-model_v2	Inner_Membrane	{u'O': u'IM_1', u'N': u'IM_2'}	OPM	Manually	Exists	Pass
ENTS_ECOLI_model1_clean_residues_removed	Inner_Membrane	{'O': 'Cytoplasmic', 'N': 'Periplasmic_C'}	OPM	Uniprot_Failed	Exists	Pass
AF-Q46821-F1-model_v2	Inner_Membrane	{'O': 'Periplasmic_C', 'N': 'Cytoplasmic'}	OPM	Uniprot_Passed	Pass	Pass
AF-C1P607-F1-model_v2	Inner_Membrane	{u'O': u'IM_1', u'N': u'IM_2'}	OPM	Manually
AF-P65292-F1-model_v2	Inner_Membrane	{u'O': u'Periplasmic_C', u'N': u'Cytoplasmic'}	OPM	Manually
AF-P39263-F1-model_v2	Inner_Membrane	{u'O': u'IM_1', u'N': u'IM_2'}	OPM	Manually	Exists	Exists
1xnf-assembly1	Inner_Membrane	{u'O': u'IM_1', u'N': u'IM_2'}	OPM	Manually
CPLX0-8238_AlphaMulti	Inner_Membrane	{u'O': u'Periplasmic_C', u'N': u'Cytoplasmic'}	OPM	Manually	Pass	Pass
AF-P25396-F1-model_v2	Inner_Membrane	{'O': 'Periplasmic_C', 'N': 'Cytoplasmic'}	OPM	Uniprot_Passed	Pass	Pass
AF-P76261-F1-model_v2	Inner_Membrane	{u'O': u'Periplasmic_C', u'N': u'Cytoplasmic'}	OPM	Manually
AF-P75801-F1-model_v2	Inner_Membrane	{u'O': u'Periplasmic_C', u'N': u'Cytoplasmic'}	OPM	Manually
AF-P0AFV0-F1-model_v2	Inner_Membrane	{'O': 'Periplasmic_C', 'N': 'Cytoplasmic'}	OPM	Uniprot_Failed	Exists
3ne5-assembly1	Inner_Membrane	{u'O': u'Cytoplasmic', u'N': u'Periplasmic_C'}	OPM	Manually	Pass	Pass
P17583_16_373_6gv1	Inner_Membrane	{u'O': u'IM_1', u'N': u'IM_2'}	OPM	Manually	Pass	Pass
P0AFP0_2_198_5wuf	Inner_Membrane	{'O': 'Cytoplasmic', 'N': 'Periplasmic_C'}	OPM	Uniprot_Passed	Pass	Pass
AF-P24241-F1-model_v2	Inner_Membrane	{u'O': u'Periplasmic_C', u'N': u'Cytoplasmic'}	OPM	Manually	Exists	Pass
CPLX-166_AlphaMulti	Inner_Membrane	{'O': 'Periplasmic_C', 'N': 'Cytoplasmic'}	OPM	Uniprot_Passed	Pass	Exists
P0ABG1_8_280_4q2g	Inner_Membrane	{u'O': u'IM_1', u'N': u'IM_2'}	OPM	Manually	Exists	Pass
P31125_3_291_5i20	Inner_Membrane	{'O': 'Periplasmic_C', 'N': 'Cytoplasmic'}	OPM	Uniprot_Passed	Pass	Pass
b1589_1__b1588_1__b1590_1__AlphaMulti	Inner_Membrane	{'O': 'Cytoplasmic', 'N': 'Periplasmic_C'}	OPM	Uniprot_Passed	Pass	Pass
AF-P15078-F1-model_v2	Inner_Membrane	{'O': 'Periplasmic_C', 'N': 'Cytoplasmic'}	OPM	Uniprot_Passed	Pass	Pass
b3201_2__b4261_1__b3199_1__b4262_1__AlphaMulti	Inner_Membrane	{'O': 'Periplasmic_C', 'N': 'Cytoplasmic'}	OPM	Uniprot_Passed	Pass	Pass
P0ABT8_9_294_5i20	Inner_Membrane	{'O': 'Periplasmic_C', 'N': 'Cytoplasmic'}	OPM	Uniprot_Passed	Pass	Pass
AF-Q47146-F1-model_v2	Inner_Membrane	{u'O': u'Cytoplasmic', u'N': u'Periplasmic_C'}	OPM	Manually		Pass
AF-P32705-F1-model_v2	Inner_Membrane	{'O': 'Periplasmic_C', 'N': 'Cytoplasmic'}	OPM	Uniprot_Passed	Pass	Pass
AF-P65290-F1-model_v2	Inner_Membrane	{u'O': u'Periplasmic_C', u'N': u'Cytoplasmic'}	OPM	Manually
AF-P27844-F1-model_v2	Inner_Membrane	{'O': 'Periplasmic_C', 'N': 'Cytoplasmic'}	OPM	Uniprot_Passed	Pass	Pass
YGJU-MONOMER_AlphaMulti	Inner_Membrane	{'O': 'Periplasmic_C', 'N': 'Cytoplasmic'}	OPM	Uniprot_Passed	Pass	Pass
AF-P75925-F1-model_v2	Inner_Membrane	{'O': 'Periplasmic_C', 'N': 'Cytoplasmic'}	OPM	Uniprot_Failed	Exists	Pass
YIHN_ECOLI_model1_clean_residues_removed	Inner_Membrane	{'O': 'Periplasmic_C', 'N': 'Cytoplasmic'}	OPM	Uniprot_Passed	Pass	Pass
AF-P77529-F1-model_v2	Inner_Membrane	{u'O': u'IM_1', u'N': u'IM_2'}	OPM	Manually	Exists	Pass
AF-P28911-F1-model_v2	Inner_Membrane	{u'O': u'Periplasmic_C', u'N': u'Cytoplasmic'}	OPM	Manually
ABC-3-CPLX_AlphaMulti	Inner_Membrane	{'O': 'Cytoplasmic', 'N': 'Periplasmic_C'}	OPM	Uniprot_Passed	Pass	Pass
AF-P46126-F1-model_v2	Inner_Membrane	{u'O': u'IM_1', u'N': u'IM_2'}	OPM	Manually
CPLX0-7994_AlphaMulti	Inner_Membrane	{'O': 'Cytoplasmic', 'N': 'Periplasmic_C'}	OPM	Uniprot_Failed	Exists	Exists
RMUC_ECOLI_model1_clean_residues_removed	Inner_Membrane	{u'O': u'IM_1', u'N': u'IM_2'}	OPM	Manually
AF-C1P610-F1-model_v2	Inner_Membrane	{u'O': u'IM_1', u'N': u'IM_2'}	OPM	Manually
CPLX-156_AlphaMulti	Inner_Membrane	{'O': 'Periplasmic_C', 'N': 'Cytoplasmic'}	OPM	Uniprot_Failed	Exists	Exists
AF-P0ABG4-F1-model_v2	Inner_Membrane	{'O': 'Periplasmic_C', 'N': 'Cytoplasmic'}	OPM	Uniprot_Failed	Exists	Pass
AF-P0ABP6-F1-model_v2	Inner_Membrane	{'O': 'Cytoplasmic', 'N': 'Periplasmic_C'}	OPM	Uniprot_Failed	Exists	Exists
AF-P0ADY1-F1-model_v2	Inner_Membrane	{'O': 'Periplasmic_C', 'N': 'Cytoplasmic'}	OPM	Uniprot_Failed
YDIM_ECOLI_model1_clean_residues_removed	Inner_Membrane	{'O': 'Periplasmic_C', 'N': 'Cytoplasmic'}	OPM	Uniprot_Failed	Exists	Pass
P37662_7_395_6g9x	Inner_Membrane	{'O': 'Periplasmic_C', 'N': 'Cytoplasmic'}	OPM	Uniprot_Passed	Pass	Pass
CPLX0-7717_AlphaMulti	Inner_Membrane	{'O': 'Periplasmic_C', 'N': 'Cytoplasmic'}	OPM	Uniprot_Failed
AF-P77619-F1-model_v2	Inner_Membrane	{u'O': u'Periplasmic_C', u'N': u'Cytoplasmic'}	OPM	Manually
P25527_8_452_5oqt	Inner_Membrane	{'O': 'Periplasmic_C', 'N': 'Cytoplasmic'}	OPM	Uniprot_Passed	Pass	Pass
AF-P0AFZ7-F1-model_v2	Inner_Membrane	{'O': 'Periplasmic_C', 'N': 'Cytoplasmic'}	OPM	Uniprot_Failed	Exists	Pass
AF-P0AAP1-F1-model_v2	Inner_Membrane	{u'O': u'Periplasmic_C', u'N': u'Cytoplasmic'}	OPM	Manually	Exists	Pass
P25714_49_532_6al2	Inner_Membrane	{'O': 'Cytoplasmic', 'N': 'Periplasmic_C'}	OPM	Uniprot_Failed	Exists	Exists
AF-P23837-F1-model_v2	Inner_Membrane	{'O': 'Periplasmic_C', 'N': 'Cytoplasmic'}	OPM	Uniprot_Failed
AF-P37443-F1-model_v2	Inner_Membrane	{u'O': u'IM_1', u'N': u'IM_2'}	OPM	Manually	Exists	Pass
AF-A5A615-F1-model_v2	Inner_Membrane	{u'O': u'IM_1', u'N': u'IM_2'}	OPM	Manually
AF-P52645-F1-model_v2	Inner_Membrane	{u'O': u'Periplasmic_C', u'N': u'Cytoplasmic'}	OPM	Manually
AF-P37649-F1-model_v2	Inner_Membrane	{u'O': u'Periplasmic_C', u'N': u'Cytoplasmic'}	OPM	Manually
AF-P76445-F1-model_v2	Inner_Membrane	{'O': 'Periplasmic_C', 'N': 'Cytoplasmic'}	OPM	Uniprot_Passed	Pass	Pass
AF-C1P612-F1-model_v2	Inner_Membrane	{u'O': u'IM_1', u'N': u'IM_2'}	OPM	Manually
AF-P33342-F1-model_v2	Inner_Membrane	{u'O': u'Periplasmic_C', u'N': u'Cytoplasmic'}	OPM	Manually
ABC-35-CPLX_AlphaMulti	Inner_Membrane	{'O': 'Periplasmic_C', 'N': 'Cytoplasmic'}	OPM	Uniprot_Passed	Pass	Pass
AF-P0AC96-F1-model_v2	Inner_Membrane	{'O': 'Cytoplasmic', 'N': 'Periplasmic_C'}	OPM	Uniprot_Failed	Exists	Exists
AF-P77354-F1-model_v2	Inner_Membrane	{'O': 'Periplasmic_C', 'N': 'Cytoplasmic'}	OPM	Uniprot_Failed
AF-P0AAT4-F1-model_v2	Inner_Membrane	{'O': 'Cytoplasmic', 'N': 'Periplasmic_C'}	OPM	Uniprot_Failed	Exists	Exists
AF-P31801-F1-model_v2	Inner_Membrane	{'O': 'Periplasmic_C', 'N': 'Cytoplasmic'}	OPM	Uniprot_Passed	Pass	Pass
AF-P0A8H3-F1-model_v2	Inner_Membrane	{u'O': u'IM_1', u'N': u'IM_2'}	OPM	Manually	Pass	Pass
AF-P58042-F1-model_v2	Inner_Membrane	{u'O': u'IM_1', u'N': u'IM_2'}	OPM	Manually
YGCS_ECOLI_model1_clean_residues_removed	Inner_Membrane	{'O': 'Periplasmic_C', 'N': 'Cytoplasmic'}	OPM	Uniprot_Failed	Exists	Pass
AF-P64439-F1-model_v2	Inner_Membrane	{'O': 'Periplasmic_C', 'N': 'Cytoplasmic'}	OPM	Uniprot_Failed	Exists	Exists
ABC-52-CPLX_AlphaMulti	Inner_Membrane	{'O': 'Periplasmic_C', 'N': 'Cytoplasmic'}	OPM	Uniprot_Passed	Pass	Pass
AF-Q46755-F1-model_v2	Inner_Membrane	{'O': 'Cytoplasmic', 'N': 'Periplasmic_C'}	OPM	Uniprot_Passed	Pass	Pass
LACY_ECOLI_model1_clean_residues_removed	Inner_Membrane	{'O': 'Periplasmic_C', 'N': 'Cytoplasmic'}	OPM	Uniprot_Passed	Pass	Pass
AF-P38392-F1-model_v2	Inner_Membrane	{u'O': u'Cytoplasmic', u'N': u'Periplasmic_C'}	OPM	Manually
AF-P0A6J3-F1-model_v2	Inner_Membrane	{'O': 'Periplasmic_C', 'N': 'Cytoplasmic'}	OPM	Uniprot_Failed	Exists	Pass
AF-P31826-F1-model_v2	Inner_Membrane	{'O': 'Periplasmic_C', 'N': 'Cytoplasmic'}	OPM	Uniprot_Failed	Exists	Pass
AF-P64619-F1-model_v2	Inner_Membrane	{u'O': u'Periplasmic_C', u'N': u'Cytoplasmic'}	OPM	Manually
AF-P58041-F1-model_v2	Inner_Membrane	{u'O': u'IM_1', u'N': u'IM_2'}	OPM	Manually
AF-P76692-F1-model_v2	Inner_Membrane	{u'O': u'IM_1', u'N': u'IM_2'}	OPM	Manually
AF-P0AE74-F1-model_v2	Inner_Membrane	{u'O': u'IM_1', u'N': u'IM_2'}	OPM	Manually	Pass	Pass
4yxb-assembly1	Inner_Membrane	{u'O': u'IM_1', u'N': u'IM_2'}	OPM	Manually
1g57-assembly1	Inner_Membrane	{u'O': u'IM_1', u'N': u'IM_2'}	OPM	Manually
AF-P64485-F1-model_v2	Inner_Membrane	{u'O': u'IM_1', u'N': u'IM_2'}	OPM	Manually		Pass
Q6BF87_1_35_5lbj	Inner_Membrane	{u'O': u'IM_1', u'N': u'IM_2'}	OPM	Manually
YEBT_ECOLI_model1_clean_residues_removed	Inner_Membrane	{'O': 'Cytoplasmic', 'N': 'Periplasmic_C'}	OPM	Uniprot_Failed
AF-P76239-F1-model_v2	Inner_Membrane	{u'O': u'IM_1', u'N': u'IM_2'}	OPM	Manually
ABC-4-CPLX_AlphaMulti	Inner_Membrane	{'O': 'Periplasmic_C', 'N': 'Cytoplasmic'}	OPM	Uniprot_Passed	Pass	Pass
AF-Q2M5U1-F1-model_v2	Inner_Membrane	{u'O': u'IM_1', u'N': u'IM_2'}	OPM	Manually
AF-P76446-F1-model_v2	Inner_Membrane	{u'O': u'Periplasmic_C', u'N': u'Cytoplasmic'}	OPM	Manually
AF-C1P603-F1-model_v2	Inner_Membrane	{'O': 'Periplasmic_C', 'N': 'Cytoplasmic'}	OPM	Uniprot_Failed
AF-P67729-F1-model_v2	Inner_Membrane	{u'O': u'IM_1', u'N': u'IM_2'}	OPM	Manually	Exists	Pass
AF-P46141-F1-model_v2	Inner_Membrane	{'O': 'Periplasmic_C', 'N': 'Cytoplasmic'}	OPM	Uniprot_Failed	Exists	Pass
AF-P39270-F1-model_v2	Inner_Membrane	{'O': 'Periplasmic_C', 'N': 'Cytoplasmic'}	OPM	Uniprot_Failed	Exists	Pass
7zc2-assembly1	Inner_Membrane	{'O': 'Periplasmic_C', 'N': 'Cytoplasmic'}	OPM	Uniprot_Passed	Pass	Pass
AF-P75885-F1-model_v2	Inner_Membrane	{'O': 'Cytoplasmic', 'N': 'Periplasmic_C'}	OPM	Uniprot_Failed
AF-P0AEH8-F1-model_v2	Inner_Membrane	{'O': 'Cytoplasmic', 'N': 'Periplasmic_C'}	OPM	Uniprot_Failed	Exists	Exists
AF-P75971-F1-model_v2	Inner_Membrane	{u'O': u'IM_1', u'N': u'IM_2'}	OPM	Manually
AF-P0AA73-F1-model_v2	Inner_Membrane	{'O': 'Periplasmic_C', 'N': 'Cytoplasmic'}	OPM	Uniprot_Failed	Exists	Pass
P0AAE2_5_452_6f34	Inner_Membrane	{'O': 'Periplasmic_C', 'N': 'Cytoplasmic'}	OPM	Uniprot_Passed	Pass	Pass
6mhu-assembly1	Inner_Membrane	{'O': 'Periplasmic_C', 'N': 'Cytoplasmic'}	OPM	Uniprot_Passed	Pass	Pass
AF-P76577-F1-model_v2	Inner_Membrane	{'O': 'Periplasmic_C', 'N': 'Cytoplasmic'}	OPM	Uniprot_Failed
AF-P0AD17-F1-model_v2	Inner_Membrane	{'O': 'Periplasmic_C', 'N': 'Cytoplasmic'}	OPM	Uniprot_Failed	Exists	Exists
AF-Q46824-F1-model_v2	Inner_Membrane	{'O': 'Periplasmic_C', 'N': 'Cytoplasmic'}	OPM	Uniprot_Failed
AF-P25747-F1-model_v2	Inner_Membrane	{u'O': u'IM_1', u'N': u'IM_2'}	OPM	Manually	Exists	Pass
P76146_22_292_4wd7	Inner_Membrane	{u'O': u'Periplasmic_C', u'N': u'Cytoplasmic'}	OPM	Manually	Pass	Pass
AF-P39386-F1-model_v2	Inner_Membrane	{'O': 'Periplasmic_C', 'N': 'Cytoplasmic'}	OPM	Uniprot_Passed	Pass	Pass
AF-P0AA57-F1-model_v2	Inner_Membrane	{u'O': u'Periplasmic_C', u'N': u'Cytoplasmic'}	OPM	Manually
AF-P75835-F1-model_v2	Inner_Membrane	{'O': 'Periplasmic_C', 'N': 'Cytoplasmic'}	OPM	Uniprot_Passed	Pass	Pass
CPLX0-2621_AlphaMulti	Inner_Membrane	{'O': 'Periplasmic_C', 'N': 'Cytoplasmic'}	OPM	Uniprot_Failed
AF-P0AC78-F1-model_v2	Inner_Membrane	{'O': 'Cytoplasmic', 'N': 'Periplasmic_C'}	OPM	Uniprot_Failed	Exists	Pass
AF-P0AAU5-F1-model_v2	Inner_Membrane	{u'O': u'IM_1', u'N': u'IM_2'}	OPM	Manually	Exists	Exists
TMAOREDUCTI-CPLX_AlphaMulti	Inner_Membrane	{'O': 'Periplasmic_C', 'N': 'Cytoplasmic'}	OPM	Uniprot_Failed
AF-P0DPP3-F1-model_v2	Inner_Membrane	{u'O': u'IM_1', u'N': u'IM_2'}	OPM	Manually
AF-P0ADB7-F1-model_v2	Inner_Membrane	{u'O': u'IM_1', u'N': u'IM_2'}	OPM	Manually
7jz2-assembly1	Inner_Membrane	{'O': 'Periplasmic_C', 'N': 'Cytoplasmic'}	OPM	Uniprot_Passed	Pass	Pass
AF-P77091-F1-model_v2	Inner_Membrane	{u'O': u'Periplasmic_C', u'N': u'Cytoplasmic'}	OPM	Manually
2qfi-assembly2	Inner_Membrane	{'O': 'Cytoplasmic', 'N': 'Periplasmic_C'}	OPM	Uniprot_Failed	Exists
AF-P0AFJ7-F1-model_v2	Inner_Membrane	{'O': 'Periplasmic_C', 'N': 'Cytoplasmic'}	OPM	Uniprot_Failed	Exists	Pass
AF-P0AEJ0-F1-model_v2	Inner_Membrane	{'O': 'Periplasmic_C', 'N': 'Cytoplasmic'}	OPM	Uniprot_Passed	Pass	Pass
AF-P0ABC3-F1-model_v2	Inner_Membrane	{'O': 'Periplasmic_C', 'N': 'Cytoplasmic'}	OPM	Uniprot_Failed
CPLX0-3970_AlphaMulti	Inner_Membrane	{'O': 'Periplasmic_C', 'N': 'Cytoplasmic'}	OPM	Uniprot_Passed	Pass	Pass
AF-P60632-F1-model_v2	Inner_Membrane	{'O': 'Cytoplasmic', 'N': 'Periplasmic_C'}	OPM	Uniprot_Passed	Pass	Pass
AF-P76091-F1-model_v2	Inner_Membrane	{u'O': u'Cytoplasmic', u'N': u'Periplasmic_C'}	OPM	Manually	Exists	Pass
AF-P77307-F1-model_v2	Inner_Membrane	{'O': 'Cytoplasmic', 'N': 'Periplasmic_C'}	OPM	Uniprot_Failed	Exists	Pass
CPLX0-7720_AlphaMulti	Inner_Membrane	{'O': 'Periplasmic_C', 'N': 'Cytoplasmic'}	OPM	Uniprot_Passed	Pass	Pass
CPLX0-231_AlphaMulti	Inner_Membrane	{u'O': u'Cytoplasmic', u'N': u'Periplasmic_C'}	OPM	Manually	Exists	Pass
AF-P64481-F1-model_v2	Inner_Membrane	{'O': 'Periplasmic_C', 'N': 'Cytoplasmic'}	OPM	Uniprot_Failed	Exists	Pass
AF-P0AE42-F1-model_v2	Inner_Membrane	{u'O': u'IM_1', u'N': u'IM_2'}	OPM	Manually
AF-P0AE14-F1-model_v2	Inner_Membrane	{'O': 'Periplasmic_C', 'N': 'Cytoplasmic'}	OPM	Uniprot_Failed	Exists	Exists
AF-P0ABC0-F1-model_v2	Inner_Membrane	{'O': 'Periplasmic_C', 'N': 'Cytoplasmic'}	OPM	Uniprot_Passed	Pass	Pass
AF-P75763-F1-model_v2	Inner_Membrane	{'O': 'Periplasmic_C', 'N': 'Cytoplasmic'}	OPM	Uniprot_Failed	Exists	Pass
KEFA_ECOLI_model1_clean_residues_removed	Inner_Membrane	{'O': 'Cytoplasmic', 'N': 'Periplasmic_C'}	OPM	Uniprot_Failed	Exists	Exists
b0740_1__b0741_1__AlphaMulti	Inner_Membrane	{u'O': u'Cytoplasmic', u'N': u'Periplasmic_C'}	OPM	Manually
AF-P0ADA5-F1-model_v2	Inner_Membrane	{u'O': u'Periplasmic_C', u'N': u'Cytoplasmic'}	OPM	Manually
P32716_32_342_4tko	Inner_Membrane	{'O': 'Periplasmic_C', 'N': 'Cytoplasmic'}	OPM	Uniprot_Failed
AF-Q46839-F1-model_v2	Inner_Membrane	{'O': 'Cytoplasmic', 'N': 'Periplasmic_C'}	OPM	Uniprot_Failed	Exists	Pass
7nb6-assembly1	Inner_Membrane	{'O': 'Cytoplasmic', 'N': 'Periplasmic_C'}	OPM	Uniprot_Passed	Pass	Pass
AF-P0AAW5-F1-model_v2	Inner_Membrane	{'O': 'Periplasmic_C', 'N': 'Cytoplasmic'}	OPM	Uniprot_Passed	Pass	Pass
AF-P46478-F1-model_v2	Inner_Membrane	{u'O': u'IM_1', u'N': u'IM_2'}	OPM	Manually
P0ABB8_43_898_4hqj	Inner_Membrane	{'O': 'Periplasmic_C', 'N': 'Cytoplasmic'}	OPM	Uniprot_Passed	Pass	Pass
AF-P31474-F1-model_v2	Inner_Membrane	{'O': 'Periplasmic_C', 'N': 'Cytoplasmic'}	OPM	Uniprot_Passed	Pass	Pass
AF-P75712-F1-model_v2	Inner_Membrane	{'O': 'Periplasmic_C', 'N': 'Cytoplasmic'}	OPM	Uniprot_Passed	Pass	Pass
P39285_831_1086_4hw9	Inner_Membrane	{'tmhmm_leaflet_O': 'Periplasmic_C', 'tmhmm_leaflet_I': 'Cytoplasmic'}	TMHMM		Exists	Pass
P77304_17_487_6gs1	Inner_Membrane	{'O': 'Periplasmic_C', 'N': 'Cytoplasmic'}	OPM	Uniprot_Passed	Pass	Pass
AF-C1P601-F1-model_v2	Inner_Membrane	{u'O': u'IM_1', u'N': u'IM_2'}	OPM	Manually
2qi9-assembly1	Inner_Membrane	{'O': 'Periplasmic_C', 'N': 'Cytoplasmic'}	OPM	Uniprot_Passed	Pass	Pass
AF-P36554-F1-model_v2	Inner_Membrane	{'O': 'Cytoplasmic', 'N': 'Periplasmic_C'}	OPM	Uniprot_Failed	Exists	Pass
AF-P24207-F1-model_v2	Inner_Membrane	{'O': 'Periplasmic_C', 'N': 'Cytoplasmic'}	OPM	Uniprot_Passed	Pass	Pass
AF-P31440-F1-model_v2	Inner_Membrane	{'O': 'Periplasmic_C', 'N': 'Cytoplasmic'}	OPM	Uniprot_Passed	Pass	Pass
AF-P32710-F1-model_v2	Inner_Membrane	{u'O': u'IM_1', u'N': u'IM_2'}	OPM	Manually	Pass	Pass
AF-P0ABP3-F1-model_v2	Inner_Membrane	{u'O': u'IM_1', u'N': u'IM_2'}	OPM	Manually	Exists	Pass
6vwk-assembly1	Inner_Membrane	{'O': 'Cytoplasmic', 'N': 'Periplasmic_C'}	OPM	Uniprot_Passed	Pass	Pass
3qe7-assembly2	Inner_Membrane	{'O': 'Periplasmic_C', 'N': 'Cytoplasmic'}	OPM	Uniprot_Passed	Pass	Pass
AF-P76090-F1-model_v2	Inner_Membrane	{'O': 'Cytoplasmic', 'N': 'Periplasmic_C'}	OPM	Uniprot_Failed	Exists	Pass
AF-P76521-F1-model_v2	Inner_Membrane	{u'O': u'IM_1', u'N': u'IM_2'}	OPM	Manually	Exists	Exists
AF-P0AA60-F1-model_v2	Inner_Membrane	{'O': 'Cytoplasmic', 'N': 'Periplasmic_C'}	OPM	Uniprot_Failed	Exists	Exists
AF-P64627-F1-model_v2	Inner_Membrane	{u'O': u'Periplasmic_C', u'N': u'Cytoplasmic'}	OPM	Manually
AF-P31452-F1-model_v2	Inner_Membrane	{'O': 'Cytoplasmic', 'N': 'Periplasmic_C'}	OPM	Uniprot_Failed	Exists	Pass
YHHQ_ECOLI_model1_clean_residues_removed	Inner_Membrane	{'O': 'Periplasmic_C', 'N': 'Cytoplasmic'}	OPM	Uniprot_Failed	Exists	Pass
AF-P0AB98-F1-model_v2	Inner_Membrane	{u'O': u'IM_1', u'N': u'IM_2'}	OPM	Manually
CPLX0-7684_AlphaMulti	Inner_Membrane	{'O': 'Cytoplasmic', 'N': 'Periplasmic_C'}	OPM	Uniprot_Failed	Exists	Pass
AF-P0AB26-F1-model_v2	Inner_Membrane	{u'O': u'Periplasmic_C', u'N': u'Cytoplasmic'}	OPM	Manually
7aci-assembly1	Inner_Membrane	{'O': 'Periplasmic_C', 'N': 'Cytoplasmic'}	OPM	Uniprot_Passed	Pass	Pass
P28246_6_363_6oom	Inner_Membrane	{'O': 'Periplasmic_C', 'N': 'Cytoplasmic'}	OPM	Uniprot_Passed	Pass	Pass
AF-P37683-F1-model_v2	Inner_Membrane	{'O': 'Cytoplasmic', 'N': 'Periplasmic_C'}	OPM	Uniprot_Failed
MHPT_ECOLI_model1_clean_residues_removed	Inner_Membrane	{'O': 'Periplasmic_C', 'N': 'Cytoplasmic'}	OPM	Uniprot_Passed	Pass	Pass
AF-P75968-F1-model_v2	Inner_Membrane	{u'O': u'IM_1', u'N': u'IM_2'}	OPM	Manually	Pass	Pass
AF-P75818-F1-model_v2	Inner_Membrane	{u'O': u'Periplasmic_C', u'N': u'Cytoplasmic'}	OPM	Manually
AF-P0ABX8-F1-model_v2	Inner_Membrane	{u'O': u'Cytoplasmic', u'N': u'Periplasmic_C'}	OPM	Manually
AF-C1P616-F1-model_v2	Inner_Membrane	{u'O': u'IM_1', u'N': u'IM_2'}	OPM	Manually
P36678_7_149_3jc9	Inner_Membrane	{'O': 'Periplasmic_C', 'N': 'Cytoplasmic'}	OPM	Uniprot_Failed
AF-P0CB39-F1-model_v2	Inner_Membrane	{u'O': u'Periplasmic_C', u'N': u'Cytoplasmic'}	OPM	Manually	Pass	Pass
AF-C1P617-F1-model_v2	Inner_Membrane	{u'O': u'IM_1', u'N': u'IM_2'}	OPM	Manually
AF-P65294-F1-model_v2	Inner_Membrane	{u'O': u'Periplasmic_C', u'N': u'Cytoplasmic'}	OPM	Manually
AF-P71238-F1-model_v2	Inner_Membrane	{u'O': u'IM_1', u'N': u'IM_2'}	OPM	Manually	Exists	Pass
AF-P0ACX0-F1-model_v2	Inner_Membrane	{'O': 'Periplasmic_C', 'N': 'Cytoplasmic'}	OPM	Uniprot_Passed	Pass	Exists
ATPASE-1-CPLX_no_MONOMER0-12_AlphaMulti	Inner_Membrane	{'O': 'Cytoplasmic', 'N': 'Periplasmic_C'}	OPM	Uniprot_Passed	Pass	Exists
ABC-42-CPLX_AlphaMulti	Inner_Membrane	{'O': 'Periplasmic_C', 'N': 'Cytoplasmic'}	OPM	Uniprot_Failed	Exists	Pass
AF-P0AER8-F1-model_v2	Inner_Membrane	{'O': 'Cytoplasmic', 'N': 'Periplasmic_C'}	OPM	Uniprot_Passed	Pass	Exists
MARC_ECOLI_model1_clean_residues_removed	Inner_Membrane	{'O': 'Cytoplasmic', 'N': 'Periplasmic_C'}	OPM	Uniprot_Passed	Pass	Exists
AF-P77172-F1-model_v2	Inner_Membrane	{'O': 'Periplasmic_C', 'N': 'Cytoplasmic'}	OPM	Uniprot_Failed	Exists	Pass
AF-P40719-F1-model_v2	Inner_Membrane	{'O': 'Periplasmic_C', 'N': 'Cytoplasmic'}	OPM	Uniprot_Failed
ATPF-CPLX_AlphaMulti	Inner_Membrane	{u'O': u'Cytoplasmic', u'N': u'Periplasmic_C'}	OPM	Manually
AF-P64548-F1-model_v2	Inner_Membrane	{u'O': u'Periplasmic_C', u'N': u'Cytoplasmic'}	OPM	Manually
AF-P09391-F1-model_v2	Inner_Membrane	{'O': 'Periplasmic_C', 'N': 'Cytoplasmic'}	OPM	Uniprot_Failed	Exists	Exists
YHHS_ECOLI_model1_clean_residues_removed	Inner_Membrane	{'O': 'Periplasmic_C', 'N': 'Cytoplasmic'}	OPM	Uniprot_Passed	Pass	Pass
P75783_462_727_3udc	Inner_Membrane	{u'O': u'Cytoplasmic', u'N': u'Periplasmic_C'}	OPM	Manually	Pass	Pass
AF-P27843-F1-model_v2	Inner_Membrane	{'O': 'Periplasmic_C', 'N': 'Cytoplasmic'}	OPM	Uniprot_Failed	Exists	Exists
AF-P0AE16-F1-model_v2	Inner_Membrane	{'O': 'Periplasmic_C', 'N': 'Cytoplasmic'}	OPM	Uniprot_Passed	Pass	Pass
YAGG_ECOLI_model1_clean_residues_removed	Inner_Membrane	{'O': 'Periplasmic_C', 'N': 'Cytoplasmic'}	OPM	Uniprot_Passed	Pass	Pass
PYRNUTRANSHYDROGEN-CPLX_AlphaMulti	Inner_Membrane	{'O': 'Cytoplasmic', 'N': 'Periplasmic_C'}	OPM	Uniprot_Failed	Exists	Pass
ABC-7-CPLX_AlphaMulti	Inner_Membrane	{'O': 'Periplasmic_C', 'N': 'Cytoplasmic'}	OPM	Uniprot_Passed	Pass	Pass
AF-P75870-F1-model_v2	Inner_Membrane	{'O': 'Cytoplasmic', 'N': 'Periplasmic_C'}	OPM	Uniprot_Failed	Exists	Pass
AF-P0A6M2-F1-model_v2	Inner_Membrane	{u'O': u'IM_1', u'N': u'IM_2'}	OPM	Manually
SHIA_ECOLI_model1_clean_residues_removed	Inner_Membrane	{'O': 'Periplasmic_C', 'N': 'Cytoplasmic'}	OPM	Uniprot_Failed	Exists	Pass
AF-P75788-F1-model_v2	Inner_Membrane	{'O': 'Periplasmic_C', 'N': 'Cytoplasmic'}	OPM	Uniprot_Failed	Exists	Pass
AF-P64432-F1-model_v2	Inner_Membrane	{'O': 'Cytoplasmic', 'N': 'Periplasmic_C'}	OPM	Uniprot_Failed	Exists	Pass
b0739_1__b0737_6__AlphaMulti	Inner_Membrane	{'O': 'Periplasmic_C', 'N': 'Cytoplasmic'}	OPM	Uniprot_Passed	Pass	Pass
AF-P23910-F1-model_v2	Inner_Membrane	{'O': 'Periplasmic_C', 'N': 'Cytoplasmic'}	OPM	Uniprot_Passed	Pass	Pass
AF-P75961-F1-model_v2	Inner_Membrane	{'O': 'Cytoplasmic', 'N': 'Periplasmic_C'}	OPM	Uniprot_Failed	Exists	Exists
P63235_10_509_4dji	Inner_Membrane	{'O': 'Periplasmic_C', 'N': 'Cytoplasmic'}	OPM	Uniprot_Passed	Pass	Pass
AF-P76269-F1-model_v2	Inner_Membrane	{u'O': u'IM_1', u'N': u'IM_2'}	OPM	Manually	Pass	Pass
AF-P75979-F1-model_v2	Inner_Membrane	{u'O': u'IM_1', u'N': u'IM_2'}	OPM	Manually
AF-P08370-F1-model_v2	Inner_Membrane	{u'O': u'Periplasmic_C', u'N': u'Cytoplasmic'}	OPM	Manually
P69423_11_238_4hts	Inner_Membrane	{'O': 'Periplasmic_C', 'N': 'Cytoplasmic'}	OPM	Uniprot_Failed	Exists	Pass
P27837_6_450_5oqt	Inner_Membrane	{'O': 'Periplasmic_C', 'N': 'Cytoplasmic'}	OPM	Uniprot_Passed	Pass	Pass
AF-Q46892-F1-model_v2	Inner_Membrane	{'O': 'Cytoplasmic', 'N': 'Periplasmic_C'}	OPM	Uniprot_Failed	Exists	Pass
CPLX-154_AlphaMulti	Inner_Membrane	{'O': 'Periplasmic_C', 'N': 'Cytoplasmic'}	OPM	Uniprot_Failed	Exists	Pass
AF-P0ABM5-F1-model_v2	Inner_Membrane	{u'O': u'IM_1', u'N': u'IM_2'}	OPM	Manually
AF-P39379-F1-model_v2	Inner_Membrane	{u'O': u'IM_1', u'N': u'IM_2'}	OPM	Manually	Exists	Exists
AF-P33927-F1-model_v2	Inner_Membrane	{'O': 'Cytoplasmic', 'N': 'Periplasmic_C'}	OPM	Uniprot_Passed	Pass	Pass
AF-P23890-F1-model_v2	Inner_Membrane	{u'O': u'Cytoplasmic', u'N': u'Periplasmic_C'}	OPM	Manually
UHPT_ECOLI_model1_clean_residues_removed	Inner_Membrane	{'O': 'Periplasmic_C', 'N': 'Cytoplasmic'}	OPM	Uniprot_Passed	Pass	Pass
AF-P75839-F1-model_v2	Inner_Membrane	{u'O': u'Cytoplasmic', u'N': u'Periplasmic_C'}	OPM	Manually	Pass	Pass
CPLX-170_AlphaMulti	Inner_Membrane	{'O': 'Periplasmic_C', 'N': 'Cytoplasmic'}	OPM	Uniprot_Passed	Pass	Pass
AF-P42640-F1-model_v2	Inner_Membrane	{'O': 'Periplasmic_C', 'N': 'Cytoplasmic'}	OPM	Uniprot_Failed	Exists	Exists
AF-P31121-F1-model_v2	Inner_Membrane	{u'O': u'Periplasmic_C', u'N': u'Cytoplasmic'}	OPM	Manually
ABC-40-CPLX_AlphaMulti	Inner_Membrane	{'O': 'Periplasmic_C', 'N': 'Cytoplasmic'}	OPM	Uniprot_Passed	Pass	Pass
AF-P39338-F1-model_v2	Inner_Membrane	{'O': 'Cytoplasmic', 'N': 'Periplasmic_C'}	OPM	Uniprot_Passed	Pass	Exists
AF-P58034-F1-model_v2	Inner_Membrane	{'O': 'Periplasmic_C', 'N': 'Cytoplasmic'}	OPM	Uniprot_Failed
7n9z-assembly1	Inner_Membrane	{'O': 'Cytoplasmic', 'N': 'Periplasmic_C'}	OPM	Uniprot_Passed	Pass
AF-P46139-F1-model_v2	Inner_Membrane	{'O': 'Periplasmic_C', 'N': 'Cytoplasmic'}	OPM	Uniprot_Failed	Exists
YCHE_ECOLI_model1_clean_residues_removed	Inner_Membrane	{u'O': u'Cytoplasmic', u'N': u'Periplasmic_C'}	OPM	Manually	Pass	Exists
SECE-G-Y-CPLX_AlphaMulti	Inner_Membrane	{'O': 'Periplasmic_C', 'N': 'Cytoplasmic'}	OPM	Uniprot_Passed	Pass	Pass
6oqr-assembly1	Inner_Membrane	{'O': 'Periplasmic_C', 'N': 'Cytoplasmic'}	OPM	Uniprot_Passed	Pass	Pass
FORMATEDEHYDROGO-CPLX_AlphaMulti	Inner_Membrane	{'O': 'Periplasmic_C', 'N': 'Cytoplasmic'}	OPM	Uniprot_Failed	Exists	Pass
ABC-8-CPLX_AlphaMulti	Inner_Membrane	{'O': 'Periplasmic_C', 'N': 'Cytoplasmic'}	OPM	Uniprot_Failed	Exists	Pass
1q16-assembly1	Inner_Membrane	{'O': 'Periplasmic_C', 'N': 'Cytoplasmic'}	OPM	Uniprot_Passed	Pass	Pass
AF-P64453-F1-model_v2	Inner_Membrane	{u'O': u'IM_1', u'N': u'IM_2'}	OPM	Manually
AF-P0DPO9-F1-model_v2	Inner_Membrane	{u'O': u'IM_1', u'N': u'IM_2'}	OPM	Manually
APP-UBIOX-CPLX_AlphaMulti	Inner_Membrane	{'O': 'Cytoplasmic', 'N': 'Periplasmic_C'}	OPM	Uniprot_Passed	Pass	Pass
YDJK_ECOLI_model1_clean_residues_removed	Inner_Membrane	{'O': 'Periplasmic_C', 'N': 'Cytoplasmic'}	OPM	Uniprot_Passed	Pass	Pass
AF-P37325-F1-model_v2	Inner_Membrane	{u'O': u'Periplasmic_C', u'N': u'Cytoplasmic'}	OPM	Manually
AF-P0AA49-F1-model_v2	Inner_Membrane	{u'O': u'IM_1', u'N': u'IM_2'}	OPM	Manually	Pass	Pass
AF-P0AA82-F1-model_v2	Inner_Membrane	{'O': 'Periplasmic_C', 'N': 'Cytoplasmic'}	OPM	Uniprot_Passed	Pass	Pass
AF-P30847-F1-model_v2	Inner_Membrane	{'O': 'Periplasmic_C', 'N': 'Cytoplasmic'}	OPM	Uniprot_Failed
ABC-54-CPLX_AlphaMulti	Inner_Membrane	{'O': 'Periplasmic_C', 'N': 'Cytoplasmic'}	OPM	Uniprot_Passed	Pass	Pass
AF-A5A628-F1-model_v2	Inner_Membrane	{u'O': u'Periplasmic_C', u'N': u'Cytoplasmic'}	OPM	Manually
AF-P0AA78-F1-model_v2	Inner_Membrane	{'O': 'Cytoplasmic', 'N': 'Periplasmic_C'}	OPM	Uniprot_Failed	Exists	Pass
AF-Q47153-F1-model_v2	Inner_Membrane	{u'O': u'IM_1', u'N': u'IM_2'}	OPM	Manually	Exists	Pass
AF-P32712-F1-model_v2	Inner_Membrane	{u'O': u'Periplasmic_C', u'N': u'Cytoplasmic'}	OPM	Manually
AF-P76037-F1-model_v2	Inner_Membrane	{u'O': u'IM_1', u'N': u'IM_2'}	OPM	Manually	Pass	Pass
AF-P42628-F1-model_v2	Inner_Membrane	{'O': 'Periplasmic_C', 'N': 'Cytoplasmic'}	OPM	Uniprot_Failed	Exists	Pass
P77682_3_118_5mlz	Inner_Membrane	{'O': 'Periplasmic_C', 'N': 'Cytoplasmic'}	OPM	Uniprot_Failed	Exists	Exists
AF-P0AFR2-F1-model_v2	Inner_Membrane	{'O': 'Periplasmic_C', 'N': 'Cytoplasmic'}	OPM	Uniprot_Failed	Exists	Pass
AF-P31468-F1-model_v2	Inner_Membrane	{'O': 'Periplasmic_C', 'N': 'Cytoplasmic'}	OPM	Uniprot_Failed	Exists	Pass
NAPAB-CPLX_NAPC-MONOMER_AlphaMulti	Inner_Membrane	{'O': 'Cytoplasmic', 'N': 'Periplasmic_C'}	OPM	Uniprot_Failed
ABC-70-CPLX_AlphaMulti	Inner_Membrane	{'O': 'Periplasmic_C', 'N': 'Cytoplasmic'}	OPM	Uniprot_Passed	Pass	Pass
AF-P63340-F1-model_v2	Inner_Membrane	{'O': 'Periplasmic_C', 'N': 'Cytoplasmic'}	OPM	Uniprot_Passed	Pass	Pass
YCAD_ECOLI_model1_clean_residues_removed	Inner_Membrane	{'O': 'Periplasmic_C', 'N': 'Cytoplasmic'}	OPM	Uniprot_Passed	Pass	Pass
PQIA_ECOLI_model1_clean_residues_removed	Inner_Membrane	{'O': 'Cytoplasmic', 'N': 'Periplasmic_C'}	OPM	Uniprot_Failed	Exists	Exists
AF-P0AFY2-F1-model_v2	Inner_Membrane	{'O': 'Periplasmic_C', 'N': 'Cytoplasmic'}	OPM	Uniprot_Failed
AF-P76657-F1-model_v2	Inner_Membrane	{'O': 'Periplasmic_C', 'N': 'Cytoplasmic'}	OPM	Uniprot_Passed	Pass	Exists
AF-P0ACV4-F1-model_v2	Inner_Membrane	{'O': 'Periplasmic_C', 'N': 'Cytoplasmic'}	OPM	Uniprot_Failed
ABC-19-CPLX_AlphaMulti	Inner_Membrane	{'O': 'Cytoplasmic', 'N': 'Periplasmic_C'}	OPM	Uniprot_Failed	Exists	Pass
AF-P45804-F1-model_v2	Inner_Membrane	{u'O': u'IM_1', u'N': u'IM_2'}	OPM	Manually	Pass	Pass
ABC-27-CPLX_AlphaMulti	Inner_Membrane	{'O': 'Periplasmic_C', 'N': 'Cytoplasmic'}	OPM	Uniprot_Passed	Pass	Pass
YDGEF-CPLX_AlphaMulti	Inner_Membrane	{'O': 'Periplasmic_C', 'N': 'Cytoplasmic'}	OPM	Uniprot_Passed	Pass	Pass
P0AEY8_9_400_4zp0	Inner_Membrane	{'O': 'Periplasmic_C', 'N': 'Cytoplasmic'}	OPM	Uniprot_Passed	Pass	Pass
AF-P0ADR0-F1-model_v2	Inner_Membrane	{'O': 'Cytoplasmic', 'N': 'Periplasmic_C'}	OPM	Uniprot_Failed	Exists	Exists
CPLX-167_AlphaMulti	Inner_Membrane	{u'O': u'Periplasmic_C', u'N': u'Cytoplasmic'}	OPM	Manually	Exists	Pass
AF-P25798-F1-model_v2	Inner_Membrane	{u'O': u'IM_1', u'N': u'IM_2'}	OPM	Manually
YJGL_ECOLI_model1_clean_residues_removed	Inner Membrane (No Area)	{}	OPM
2wcd-assembly1	Inner Membrane (No Area)	{}	OPM		Exists
7cg0-assembly1	Extracellular	{}	OPM	Manually
6y7s-assembly1	Extracellular	{}	OPM	Manually
3pco-assembly1	Cytoplasm	{}	OPM	Manually
5ysn-assembly1	Cytoplasm	{}	OPM	Manually
6k4y-assembly1	Cytoplasm	{}	OPM	Manually
1xdp-assembly2	Cytoplasm	{}	OPM	Manually
1xdp-assembly1	Cytoplasm	{}	OPM	Manually
6x9a-assembly3	Cytoplasm	{}	OPM	Manually
5jbq-assembly1	Cytoplasm	{}	OPM	Manually
1kkb-assembly1	Cytoplasm	{}	OPM	Manually
7nz1-assembly1	Cytoplasm	{}	OPM	Manually
RSSA_ECOLI_model1_clean_residues_removed	Cytoplasm	{}	OPM	Manually
1eum-assembly1	Cytoplasm	{}	OPM	Manually
1xck-assembly3	Cytoplasm	{}	OPM	Manually
1jsw-assembly1	Cytoplasm	{}	OPM	Manually
GATZ_ECOLI_model1_clean_residues_removed	Cytoplasm	{}	OPM	Manually
P39367_1_248_1nkv	Cytoplasm	{}	Uniprot		Pass
1gvh-assembly1	Cytoplasm	{}	OPM	Manually
KBAZ_ECOLI_model1_clean_residues_removed	Cytoplasm	{}	OPM	Manually
6w1z-assembly1	Cytoplasm	{}	OPM	Manually
1bsv-assembly1	Cytoplasm	{}	OPM	Manually
7umw-assembly1	Cytoplasm	{}	OPM	Manually
2dgm-assembly1	Cytoplasm	{}	OPM	Manually
7z19-assembly1	Cytoplasm	{}	OPM	Manually
7ag1-assembly1	Cytoplasm	{}	OPM	Manually
6gfw-assembly1	Cytoplasm	{}	OPM	Manually
6alf-assembly1	Cytoplasm	{}	OPM	Manually
CHEB_ECOLI_model1_clean_residues_removed	Cytoplasm	{}	OPM	Manually
CPLX-158_AlphaMulti	Cytoplasm	{}	TMHMM	Manually	Exists	Pass
6xl9-assembly1	Cytoplasm	{}	OPM	Manually
2f9y-assembly1	Cytoplasm	{}	OPM	Manually
1a6j-assembly1	Cytoplasm	{}	OPM	Manually
1ger-assembly1	Cytoplasm	{}	OPM	Manually
5vt0-assembly1	Cytoplasm	{}	OPM	Manually
MURB_ECOLI_model1_clean_residues_removed	Cytoplasm	{}	OPM	Manually
4kbf-assembly3	Cytoplasm	{}	OPM	Manually
2mlx-assembly1	Cytoplasm	{}	OPM	Manually
4lw4-assembly1	Cytoplasm	{}	OPM	Manually
5za0-assembly1	Cytoplasm	{}	OPM	Manually
7ogl-assembly1	Cytoplasm	{}	OPM	Manually
5ipl-assembly1	Cytoplasm	{}	OPM	Manually
1ega-assembly1	Cytoplasm	{}	OPM	Manually
MREB_ECOLI_model1_clean_residues_removed	Cytoplasm	{}	OPM	Manually
1xru-assembly2	Cytoplasm	{}	OPM	Manually
1g4b-assembly1	Cytoplasm	{}	OPM	Manually
2qfi-assembly1	Cytoplasm	{}	OPM	Manually
6jbq-assembly1	Cytoplasm	{}	OPM	Manually
5jtp-assembly1	Cytoplasm	{}	OPM	Manually
2fq1-assembly1	Cytoplasm	{}	OPM	Manually
CHER_ECOLI_model1_clean_residues_removed	Cytoplasm	{}	OPM	Manually
6pod-assembly1	Cytoplasm	{}	OPM	Manually
