# Supplementary material for: Establishing comprehensive quaternary structural proteomes from genome sequence
Source: Research Square preprint supplement (doi:10.21203/rs.3.rs-2923626/v1), 2023-05-19
Supplement: Supplementary file 2 [file manual_orient_NonMembrane.pdf › manual_orient_NonMembrane.pdf]

## Manual Orientation of Membrane Proteins

The following proteins were identified as potential membrane proteins by information provided in EcoCyc, iML1515, or Gene Ontology terms for the genes mapped to their subunits. Membrane planes that passed QCQA were identified from at least 1 of 3 methods (OPM/UniProt/TMHMM). These proteins could not be oriented (e.g. there was no topological information provided from UniProt). Manual inspection of the membrane calculations shows these to be non-membrane proteins. Literature search of the genes mapped to these structures places them in the **Cytoplasm, Periplasm, or Extracellular Matrix**.

### Non-Membrane Structures

| Cytoplasm                                                                           | Category : <b>Cytoplasmic Proteins</b>                                              |                                                                                      |                                                                                       |
|-------------------------------------------------------------------------------------|-------------------------------------------------------------------------------------|--------------------------------------------------------------------------------------|---------------------------------------------------------------------------------------|
| Cytoplasm                                                                           | Membrane planes are incorrect                                                       |                                                                                      |                                                                                       |
| 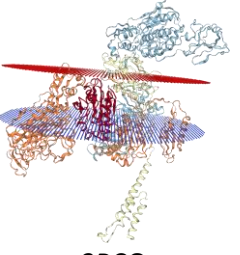   |    |    |    |
| 3PCO                                                                                | 5JTP                                                                                | GXL9                                                                                 | 1EGA                                                                                  |
|  |  |  |  |
| 7Z19                                                                                | 6POD                                                                                | 1JSW                                                                                 | 4LW4                                                                                  |
|  |  |  |  |
| 6JBQ                                                                                | CHER_ECOLI                                                                          | 2DGM                                                                                 | 1G4B                                                                                  |
|  |  |  |  |
| 1BSV                                                                                | GATZ_ECOLI                                                                          | 5IPL                                                                                 | 1XRU                                                                                  |

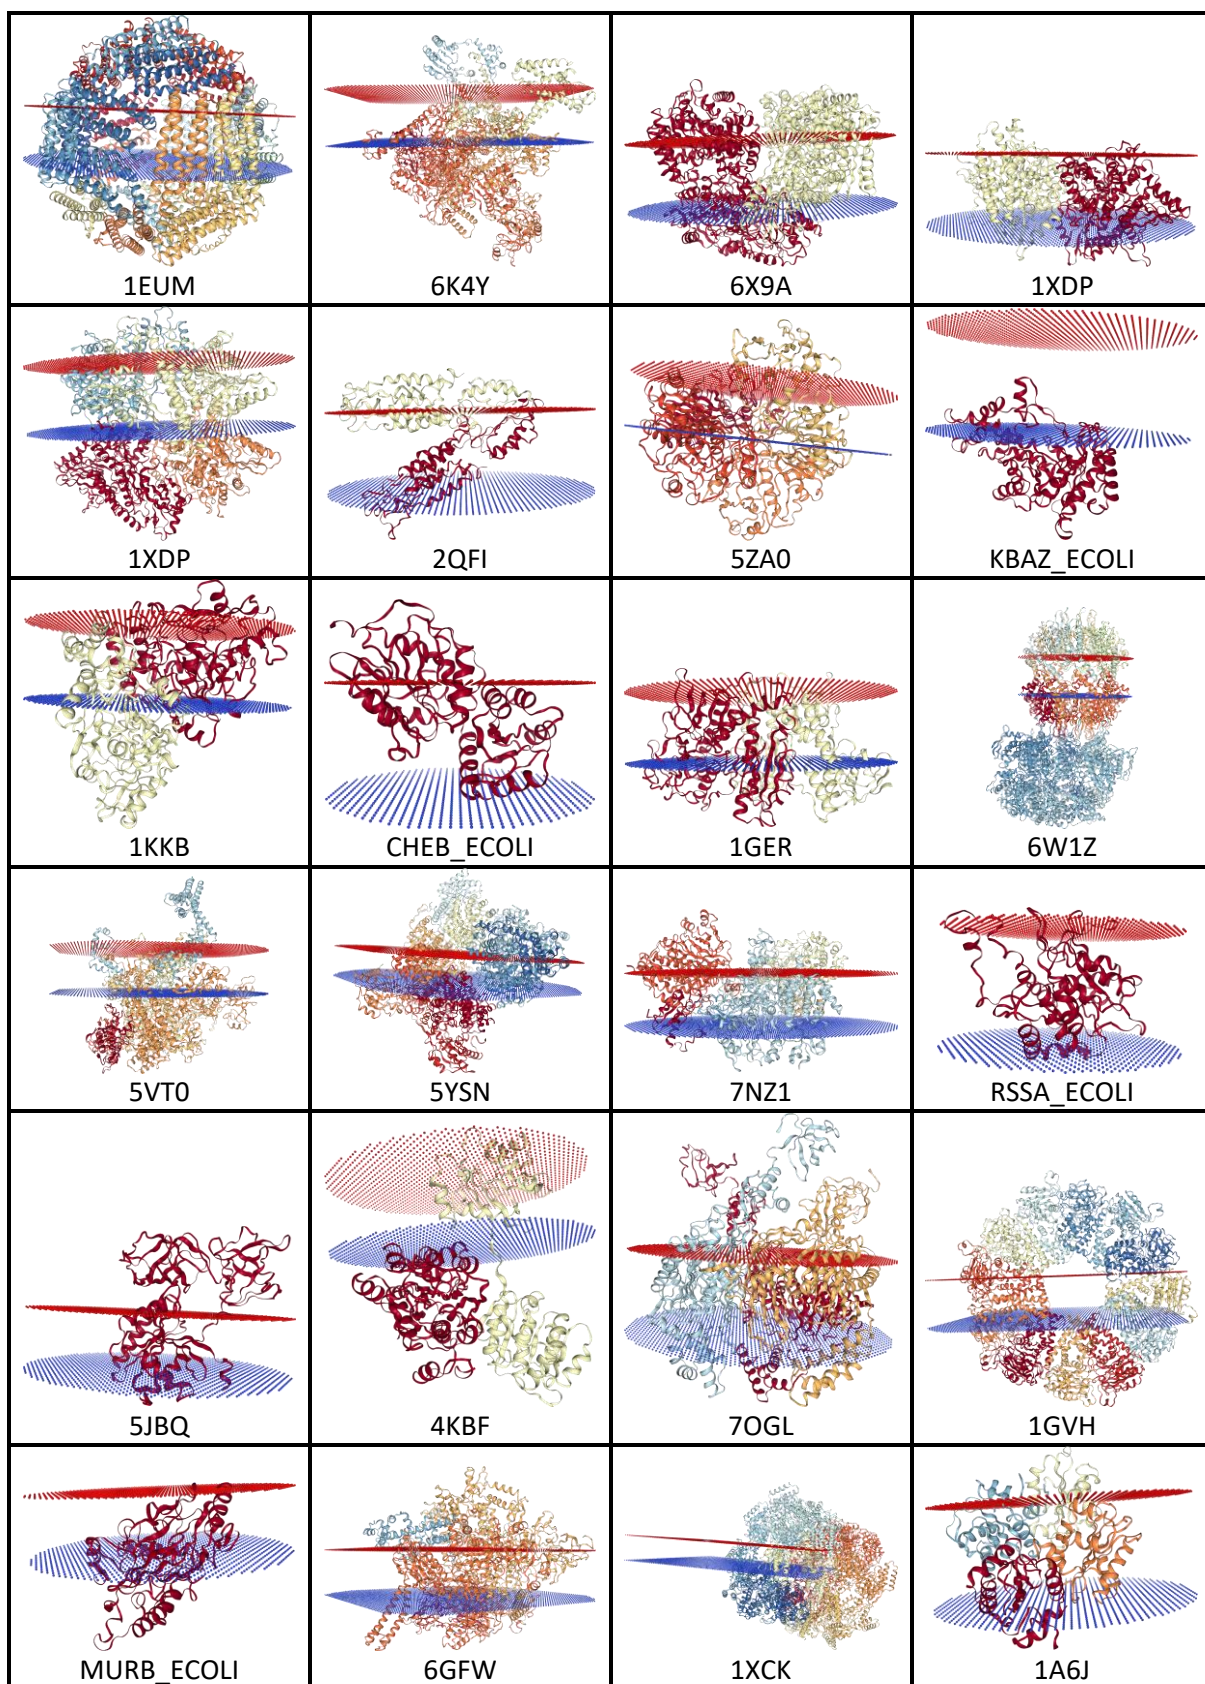



|                                                                                     |                                                                                     |                                                                                      |                                                                                       |
|-------------------------------------------------------------------------------------|-------------------------------------------------------------------------------------|--------------------------------------------------------------------------------------|---------------------------------------------------------------------------------------|
| 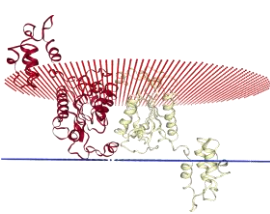   |    |    |    |
| 2FQ1                                                                                | 2MLX                                                                                | MREB_ECOLI                                                                           | CPLX-158_AlphaMulti                                                                   |
|    |    |    |    |
| 1AG1                                                                                | 6ALF                                                                                | 7UMW                                                                                 | 2F9Y                                                                                  |
| Periplasm                                                                           | Category : Periplasmic Proteins                                                     |                                                                                      |                                                                                       |
| Periplasm                                                                           |                                                                                     |                                                                                      |                                                                                       |
| Membrane planes are incorrect                                                       |                                                                                     |                                                                                      |                                                                                       |
|   |   |   |   |
| 1S7D                                                                                | 2Y4F                                                                                | 2UVK                                                                                 | OPPG_ECOLI                                                                            |
|  |  |  |  |
| YCGI_ECOLI                                                                          | 6ERJ                                                                                | DACD_ECOLI                                                                           | 1RMT                                                                                  |
|  |  |  |                                                                                       |
| PTR_A_ECOLI                                                                         | 3BDH                                                                                | 3ZHC                                                                                 |                                                                                       |
| Extracellular Space                                                                 | Category : Extracellular Proteins                                                   |                                                                                      |                                                                                       |
| Extracellular Space                                                                 |                                                                                     |                                                                                      |                                                                                       |
| Membrane planes are incorrect                                                       |                                                                                     |                                                                                      |                                                                                       |

|                                                                                    |                                                                                     |
|------------------------------------------------------------------------------------|-------------------------------------------------------------------------------------|
| 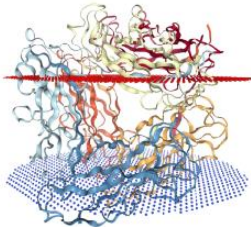  |   |
| 6y7z                                                                               | 7cgo                                                                                |
| Bad Membrane Calculation                                                           | Category : <b>Membrane Proteins</b>                                                 |
| Poor Calculation or Structure                                                      |                                                                                     |
|   |    |
| 5nik                                                                               | 5v5s                                                                                |
|  |  |
| YJGL_ECOLI                                                                         | 2wcd                                                                                |
|  |  |
| MDTQ_ECOLI                                                                         | TORS-CPLX_AlphaMulti                                                                |
