# Supplementary material for: Establishing comprehensive quaternary structural proteomes from genome sequence
Source: Research Square preprint supplement (doi:10.21203/rs.3.rs-2923626/v1), 2023-05-19
Supplement: Supplementary file 3 [file 6ef7c999926233d5771434d4.xlsx]

## Sheet: Description
				Dataset S9
				This dataset contains information for all the best pseudo-structures (see materials and methods, Fig. S8F) derived from models/structures found in AlphaFold, ITASSER, SWISS-MODELs and PDB, and for models generated by AlphaFold Multimer. Each structure source is provided in a separate excel sheet. The structures in this dataset are used to recreate the annotated gene-stoichiometry of protein compl…
				For each unique gene-stoichiometry (‘pseudo-structure’, 1 row), the following data is provided: the pseudo-structure ID, source of structure file, gene-stoichiometry, per-chain quality (sequence alignment between the gene’s AA sequence and the structure-chain’s AA sequence), list of identical structures (structures with identical gene-stoichiometries but inferior sequence identity), number of AAs…
				We note that there are two per-gene quality columns in the PDB dataset. The “pdb_quality” column uses relative per-chain scores (from the PDB Search API’s “sequence service”) while the “pdb_quality_needle” is the actual value calculated from GSPAT’s sequence alignment. The columns that are used for ranking (“quality_rank”, and “percent_true_rank”) refer to a larger dataset (Fig. S7B-E, data not p…
				We also note that the same structure can be the base for multiple gene-stoichiometries. In theory, the pseudo-structure with the highest total quality is likely to match the gene-chain data in the PDB. However, our sequence-driven PDB search allows us to represent additional gene-stoichiometries–albeit with lower sequence identity–than would be directly apparent from a simple UniProtId-driven PDB…

## Sheet: 001F-bestAlphafold
	stype	gene_stoichiometry	total_quality	pdb_quality	identical_structures	AA_length	percent_true	quality_rank	percent_true_rank
AF-A0A385XJ53-F1-model_v2_&_NOBFS_0	ALPHAFOLD	{u'b4709': 1}	89.6199	{u'b4709': {u'A': [True, 89.6198901098901]}}	[u'AF-A0A385XJ53-F1-model_v2_&_NOBFS_0']	91	1	1	1
AF-A0A385XJE6-F1-model_v2_&_NOBFS_0	ALPHAFOLD	{u'b4711': 1}	92.8898	{u'b4711': {u'A': [True, 92.88978527607362]}}	[u'AF-A0A385XJE6-F1-model_v2_&_NOBFS_0']	326	1	1	1
AF-A0A385XJK5-F1-model_v2_&_NOBFS_0	ALPHAFOLD	{u'b4605': 1}	62.4153	{u'b4605': {u'A': [True, 62.41531914893617]}}	[u'AF-A0A385XJK5-F1-model_v2_&_NOBFS_0']	47	1	1	1
AF-A0A385XJL2-F1-model_v2_&_NOBFS_0	ALPHAFOLD	{u'b4610': 1}	58.4708	{u'b4610': {u'A': [True, 58.47083333333334]}}	[u'AF-A0A385XJL2-F1-model_v2_&_NOBFS_0']	48	1	1	1
AF-A0A385XJL4-F1-model_v2_&_NOBFS_0	ALPHAFOLD	{u'b4710': 1}	87.3018	{u'b4710': {u'A': [True, 87.30179640718563]}}	[u'AF-A0A385XJL4-F1-model_v2_&_NOBFS_0']	167	1	1	1
AF-A0A385XJN2-F1-model_v2_&_NOBFS_0	ALPHAFOLD	{u'b3036': 1}	60.5327	{u'b3036': {u'A': [True, 60.53267441860466]}}	[u'AF-A0A385XJN2-F1-model_v2_&_NOBFS_0']	86	1	1	1
AF-A0A385XK32-F1-model_v2_&_NOBFS_0	ALPHAFOLD	{u'b4223': 1}	50.1315	{u'b4223': {u'A': [True, 50.13146067415729]}}	[u'AF-A0A385XK32-F1-model_v2_&_NOBFS_0']	89	1	1	1
AF-A5A605-F1-model_v2_&_NOBFS_0	ALPHAFOLD	{u'b4586': 1}	70.4942	{u'b4586': {u'A': [True, 70.49421383647798]}}	[u'AF-A5A605-F1-model_v2_&_NOBFS_0']	159	1	1	1
AF-A5A607-F1-model_v2_&_NOBFS_0	ALPHAFOLD	{u'b4589': 1}	79.8005	{u'b4589': {u'A': [True, 79.80046875]}}	[u'AF-A5A607-F1-model_v2_&_NOBFS_0']	64	1	1	1
AF-A5A611-F1-model_v2_&_NOBFS_0	ALPHAFOLD	{u'b4593': 1}	74.8088	{u'b4593': {u'A': [True, 74.80877192982457]}}	[u'AF-A5A611-F1-model_v2_&_NOBFS_0']	57	1	1	1
AF-A5A612-F1-model_v2_&_NOBFS_0	ALPHAFOLD	{u'b4594': 1}	58.3398	{u'b4594': {u'A': [True, 58.33983606557377]}}	[u'AF-A5A612-F1-model_v2_&_NOBFS_0']	61	1	1	1
AF-A5A613-F1-model_v2_&_NOBFS_0	ALPHAFOLD	{u'b4595': 1}	92.8979	{u'b4595': {u'A': [True, 92.8978947368421]}}	[u'AF-A5A613-F1-model_v2_&_NOBFS_0']	57	1	1	1
AF-A5A614-F1-model_v2_&_NOBFS_0	ALPHAFOLD	{u'b4596': 1}	86.9818	{u'b4596': {u'A': [True, 86.98175438596492]}}	[u'AF-A5A614-F1-model_v2_&_NOBFS_0']	57	1	1	1
AF-A5A615-F1-model_v2_&_NOBFS_0	ALPHAFOLD	{u'b4598': 1}	90.5561	{u'b4598': {u'A': [True, 90.55612903225804]}}	[u'AF-A5A615-F1-model_v2_&_NOBFS_0']	31	1	1	1
AF-A5A616-F1-model_v2_&_NOBFS_0	ALPHAFOLD	{u'b4599': 1}	92.2868	{u'b4599': {u'A': [True, 92.28677419354838]}}	[u'AF-A5A616-F1-model_v2_&_NOBFS_0']	31	1	1	1
AF-A5A617-F1-model_v2_&_NOBFS_0	ALPHAFOLD	{u'b4601': 1}	88.4037	{u'b4601': {u'A': [True, 88.40370370370368]}}	[u'AF-A5A617-F1-model_v2_&_NOBFS_0']	27	1	1	1
AF-A5A618-F1-model_v2_&_NOBFS_0	ALPHAFOLD	{u'b4602': 1}	96.3234	{u'b4602': {u'A': [True, 96.32344827586208]}}	[u'AF-A5A618-F1-model_v2_&_NOBFS_0']	29	1	1	1
AF-A5A619-F1-model_v2_&_NOBFS_0	ALPHAFOLD	{u'b4604': 1}	79.423	{u'b4604': {u'A': [True, 79.42296296296297]}}	[u'AF-A5A619-F1-model_v2_&_NOBFS_0']	54	1	1	1
AF-A5A621-F1-model_v2_&_NOBFS_0	ALPHAFOLD	{u'b4606': 1}	91.1584	{u'b4606': {u'A': [True, 91.15842105263157]}}	[u'AF-A5A621-F1-model_v2_&_NOBFS_0']	19	1	1	1
AF-A5A624-F1-model_v2_&_NOBFS_0	ALPHAFOLD	{u'b4613': 1}	96.1652	{u'b4613': {u'A': [True, 96.16518518518517]}}	[u'AF-A5A624-F1-model_v2_&_NOBFS_0']	27	1	1	1
AF-A5A625-F1-model_v2_&_NOBFS_0	ALPHAFOLD	{u'b4615': 1}	76.9275	{u'b4615': {u'A': [True, 76.9274774774775]}}	[u'AF-A5A625-F1-model_v2_&_NOBFS_0']	111	1	1	1
AF-A5A627-F1-model_v2_&_NOBFS_0	ALPHAFOLD	{u'b4618': 1}	93.3286	{u'b4618': {u'A': [True, 93.32862068965518]}}	[u'AF-A5A627-F1-model_v2_&_NOBFS_0']	29	1	1	1
AF-A5A628-F1-model_v2_&_NOBFS_0	ALPHAFOLD	{u'b4620': 1}	56.8357	{u'b4620': {u'A': [True, 56.83565217391303]}}	[u'AF-A5A628-F1-model_v2_&_NOBFS_0']	92	1	1	1
AF-A5A630-F1-model_v2_&_NOBFS_0	ALPHAFOLD	{u'b4622': 1}	79.5407	{u'b4622': {u'A': [True, 79.54065934065935]}}	[u'AF-A5A630-F1-model_v2_&_NOBFS_0']	91	1	1	1
AF-A8DYP9-F1-model_v2_&_NOBFS_0	ALPHAFOLD	{u'b4637': 1}	75.4882	{u'b4637': {u'A': [True, 75.48821428571429]}}	[u'AF-A8DYP9-F1-model_v2_&_NOBFS_0']	28	1	1	1
AF-A8DYQ1-F1-model_v2_&_NOBFS_0	ALPHAFOLD	{u'b4655': 1}	73.2068	{u'b4655': {u'A': [True, 73.20682926829268]}}	[u'AF-A8DYQ1-F1-model_v2_&_NOBFS_0']	41	1	1	1
AF-C1P5Z7-F1-model_v2_&_NOBFS_0	ALPHAFOLD	{u'b4662': 1}	83.7542	{u'b4662': {u'A': [True, 83.75418604651163]}}	[u'AF-C1P5Z7-F1-model_v2_&_NOBFS_0']	43	1	1	1
AF-C1P5Z8-F1-model_v2_&_NOBFS_0	ALPHAFOLD	{u'b4671': 1}	90.9161	{u'b4671': {u'A': [True, 90.91606060606063]}}	[u'AF-C1P5Z8-F1-model_v2_&_NOBFS_0']	33	1	1	1
AF-C1P5Z9-F1-model_v2_&_NOBFS_0	ALPHAFOLD	{u'b4672': 1}	82.8494	{u'b4672': {u'A': [True, 82.84941176470589]}}	[u'AF-C1P5Z9-F1-model_v2_&_NOBFS_0']	34	1	1	1
AF-C1P600-F1-model_v2_&_NOBFS_0	ALPHAFOLD	{u'b4674': 1}	74.03	{u'b4674': {u'A': [True, 74.03]}}	[u'AF-C1P600-F1-model_v2_&_NOBFS_0']	21	1	1	1
AF-C1P601-F1-model_v2_&_NOBFS_0	ALPHAFOLD	{u'b4689': 1}	76.2873	{u'b4689': {u'A': [True, 76.2872619047619]}}	[u'AF-C1P601-F1-model_v2_&_NOBFS_0']	84	1	1	1
AF-C1P602-F1-model_v2_&_NOBFS_0	ALPHAFOLD	{u'b4676': 1}	87.0725	{u'b4676': {u'A': [True, 87.07249999999999]}}	[u'AF-C1P602-F1-model_v2_&_NOBFS_0']	32	1	1	1
AF-C1P603-F1-model_v2_&_NOBFS_0	ALPHAFOLD	{u'b4675': 1}	91.7529	{u'b4675': {u'A': [True, 91.75291666666665]}}	[u'AF-C1P603-F1-model_v2_&_NOBFS_0']	24	1	1	1
AF-C1P604-F1-model_v2_&_NOBFS_0	ALPHAFOLD	{u'b4677': 1}	89.8648	{u'b4677': {u'A': [True, 89.86476190476192]}}	[u'AF-C1P604-F1-model_v2_&_NOBFS_0']	21	1	1	1
AF-C1P605-F1-model_v2_&_NOBFS_0	ALPHAFOLD	{u'b4663': 1}	81.8139	{u'b4663': {u'A': [True, 81.81392857142855]}}	[u'AF-C1P605-F1-model_v2_&_NOBFS_0']	28	1	1	1
AF-C1P606-F1-model_v2_&_NOBFS_0	ALPHAFOLD	{u'b4678': 1}	78.3405	{u'b4678': {u'A': [True, 78.3405]}}	[u'AF-C1P606-F1-model_v2_&_NOBFS_0']	20	1	1	1
AF-C1P607-F1-model_v2_&_NOBFS_0	ALPHAFOLD	{u'b4667': 1}	95.8426	{u'b4667': {u'A': [True, 95.84263157894736]}}	[u'AF-C1P607-F1-model_v2_&_NOBFS_0']	19	1	1	1
AF-C1P608-F1-model_v2_&_NOBFS_0	ALPHAFOLD	{u'b4668': 1}	91.7517	{u'b4668': {u'A': [True, 91.75166666666668]}}	[u'AF-C1P608-F1-model_v2_&_NOBFS_0']	18	1	1	1
AF-C1P609-F1-model_v2_&_NOBFS_0	ALPHAFOLD	{u'b4679': 1}	95.1978	{u'b4679': {u'A': [True, 95.19777777777777]}}	[u'AF-C1P609-F1-model_v2_&_NOBFS_0']	27	1	1	1
AF-C1P610-F1-model_v2_&_NOBFS_0	ALPHAFOLD	{u'b4680': 1}	94.62	{u'b4680': {u'A': [True, 94.61999999999999]}}	[u'AF-C1P610-F1-model_v2_&_NOBFS_0']	23	1	1	1
AF-C1P611-F1-model_v2_&_NOBFS_0	ALPHAFOLD	{u'b4687': 1}	91.7888	{u'b4687': {u'A': [True, 91.78884615384617]}}	[u'AF-C1P611-F1-model_v2_&_NOBFS_0']	26	1	1	1
AF-C1P612-F1-model_v2_&_NOBFS_0	ALPHAFOLD	{u'b4682': 1}	87.0898	{u'b4682': {u'A': [True, 87.08978260869567]}}	[u'AF-C1P612-F1-model_v2_&_NOBFS_0']	46	1	1	1
AF-C1P613-F1-model_v2_&_NOBFS_0	ALPHAFOLD	{u'b4683': 1}	88.7254	{u'b4683': {u'A': [True, 88.72538461538463]}}	[u'AF-C1P613-F1-model_v2_&_NOBFS_0']	26	1	1	1
AF-C1P614-F1-model_v2_&_NOBFS_0	ALPHAFOLD	{u'b4684': 1}	81.9359	{u'b4684': {u'A': [True, 81.93585365853659]}}	[u'AF-C1P614-F1-model_v2_&_NOBFS_0']	41	1	1	1
AF-C1P615-F1-model_v2_&_NOBFS_0	ALPHAFOLD	{u'b4665': 1}	95.7763	{u'b4665': {u'A': [True, 95.77631578947368]}}	[u'AF-C1P615-F1-model_v2_&_NOBFS_0']	19	1	1	1
AF-C1P616-F1-model_v2_&_NOBFS_0	ALPHAFOLD	{u'b4664': 1}	95.6511	{u'b4664': {u'A': [True, 95.65105263157895]}}	[u'AF-C1P616-F1-model_v2_&_NOBFS_0']	19	1	1	1
AF-C1P617-F1-model_v2_&_NOBFS_0	ALPHAFOLD	{u'b4666': 1}	89.0142	{u'b4666': {u'A': [True, 89.01421052631581]}}	[u'AF-C1P617-F1-model_v2_&_NOBFS_0']	19	1	1	1
AF-C1P618-F1-model_v2_&_NOBFS_0	ALPHAFOLD	{u'b4685': 1}	90.9827	{u'b4685': {u'A': [True, 90.98269230769232]}}	[u'AF-C1P618-F1-model_v2_&_NOBFS_0']	26	1	1	1
AF-C1P619-F1-model_v2_&_NOBFS_0	ALPHAFOLD	{u'b4669': 1}	88.1531	{u'b4669': {u'A': [True, 88.153125]}}	[u'AF-C1P619-F1-model_v2_&_NOBFS_0']	16	1	1	1
AF-C1P620-F1-model_v2_&_NOBFS_0	ALPHAFOLD	{u'b4686': 1}	74.9489	{u'b4686': {u'A': [True, 74.94888888888889]}}	[u'AF-C1P620-F1-model_v2_&_NOBFS_0']	36	1	1	1
AF-C1P621-F1-model_v2_&_NOBFS_0	ALPHAFOLD	{u'b4670': 1}	81.8829	{u'b4670': {u'A': [True, 81.88294117647058]}}	[u'AF-C1P621-F1-model_v2_&_NOBFS_0']	17	1	1	1
AF-E2JKY7-F1-model_v2_&_NOBFS_0	ALPHAFOLD	{u'b4702': 1}	83.9818	{u'b4702': {u'A': [True, 83.98176470588236]}}	[u'AF-E2JKY7-F1-model_v2_&_NOBFS_0']	17	1	1	1
AF-G3MTW7-F1-model_v2_&_NOBFS_0	ALPHAFOLD	{u'b4703': 1}	89.8124	{u'b4703': {u'A': [True, 89.81241379310346]}}	[u'AF-G3MTW7-F1-model_v2_&_NOBFS_0']	29	1	1	1
AF-O32528-F1-model_v2_&_NOBFS_0	ALPHAFOLD	{u'b2376': 1}	63.8114	{u'b2376': {u'A': [True, 63.81142857142857]}}	[u'AF-O32528-F1-model_v2_&_NOBFS_0']	91	1	1	1
AF-O32583-F1-model_v2_&_NOBFS_0	ALPHAFOLD	{u'b4407': 1}	95.3089	{u'b4407': {u'A': [True, 95.3089393939394]}}	[u'AF-O32583-F1-model_v2_&_NOBFS_0']	66	1	1	1
AF-O52982-F1-model_v2_&_NOBFS_0	ALPHAFOLD	{u'b2636': 1}	75.4599	{u'b2636': {u'A': [True, 75.45986394557823]}}	[u'AF-O52982-F1-model_v2_&_NOBFS_0']	147	1	1	1
AF-P00350-F1-model_v2_&_NOBFS_0	ALPHAFOLD	{u'b2029': 1}	98.0398	{u'b2029': {u'A': [True, 98.03976495726495]}}	[u'AF-P00350-F1-model_v2_&_NOBFS_0']	468	1	1	1
AF-P00363-F1-model_v2_&_NOBFS_0	ALPHAFOLD	{u'b4154': 1}	95.9064	{u'b4154': {u'A': [True, 95.90637873754153]}}	[u'AF-P00363-F1-model_v2_&_NOBFS_0']	602	1	1	1
AF-P00370-F1-model_v2_&_NOBFS_0	ALPHAFOLD	{u'b1761': 1}	95.7784	{u'b1761': {u'A': [True, 95.77836689038031]}}	[u'AF-P00370-F1-model_v2_&_NOBFS_0']	447	1	1	1
AF-P00393-F1-model_v2_&_NOBFS_0	ALPHAFOLD	{u'b1109': 1}	89.7062	{u'b1109': {u'A': [True, 89.70617511520736]}}	[u'AF-P00393-F1-model_v2_&_NOBFS_0']	434	1	1	1
AF-P00448-F1-model_v2_&_NOBFS_0	ALPHAFOLD	{u'b3908': 1}	98.3002	{u'b3908': {u'A': [True, 98.3002427184466]}}	[u'AF-P00448-F1-model_v2_&_NOBFS_0']	206	1	1	1
AF-P00452-F1-model_v2_&_NOBFS_0	ALPHAFOLD	{u'b2234': 1}	93.3213	{u'b2234': {u'A': [True, 93.32130091984233]}}	[u'AF-P00452-F1-model_v2_&_NOBFS_0']	761	1	1	1
AF-P00490-F1-model_v2_&_NOBFS_0	ALPHAFOLD	{u'b3417': 1}	98.1761	{u'b3417': {u'A': [True, 98.17614805520705]}}	[u'AF-P00490-F1-model_v2_&_NOBFS_0']	797	1	1	1
AF-P00509-F1-model_v2_&_NOBFS_0	ALPHAFOLD	{u'b0928': 1}	97.4385	{u'b0928': {u'A': [True, 97.43848484848485]}}	[u'AF-P00509-F1-model_v2_&_NOBFS_0']	396	1	1	1
AF-P00547-F1-model_v2_&_NOBFS_0	ALPHAFOLD	{u'b0003': 1}	97.2123	{u'b0003': {u'A': [True, 97.21232258064516]}}	[u'AF-P00547-F1-model_v2_&_NOBFS_0']	310	1	1	1
AF-P00550-F1-model_v2_&_NOBFS_0	ALPHAFOLD	{u'b3599': 1}	82.2927	{u'b3599': {u'A': [True, 82.29274725274725]}}	[u'AF-P00550-F1-model_v2_&_NOBFS_0']	637	1	1	1
AF-P00561-F1-model_v2_&_NOBFS_0	ALPHAFOLD	{u'b0002': 1}	90.6808	{u'b0002': {u'A': [True, 90.68078048780487]}}	[u'AF-P00561-F1-model_v2_&_NOBFS_0']	820	1	1	1
AF-P00562-F1-model_v2_&_NOBFS_0	ALPHAFOLD	{u'b3940': 1}	90.8903	{u'b3940': {u'A': [True, 90.89034567901234]}}	[u'AF-P00562-F1-model_v2_&_NOBFS_0']	810	1	1	1
AF-P00579-F1-model_v2_&_NOBFS_0	ALPHAFOLD	{u'b3067': 1}	83.2079	{u'b3067': {u'A': [True, 83.20792822185972]}}	[u'AF-P00579-F1-model_v2_&_NOBFS_0']	613	1	1	1
AF-P00582-F1-model_v2_&_NOBFS_0	ALPHAFOLD	{u'b3863': 1}	91.3131	{u'b3863': {u'A': [True, 91.31310344827585]}}	[u'AF-P00582-F1-model_v2_&_NOBFS_0']	928	1	1	1
AF-P00634-F1-model_v2_&_NOBFS_0	ALPHAFOLD	{u'b0383': 1}	96.0224	{u'b0383': {u'A': [True, 96.0224203821656]}}	[u'AF-P00634-F1-model_v2_&_NOBFS_0']	471	1	1	1
AF-P00722-F1-model_v2_&_NOBFS_0	ALPHAFOLD	{u'b0344': 1}	97.8895	{u'b0344': {u'A': [True, 97.889501953125]}}	[u'AF-P00722-F1-model_v2_&_NOBFS_0']	1024	1	1	1
AF-P00803-F1-model_v2_&_NOBFS_0	ALPHAFOLD	{u'b2568': 1}	90.1609	{u'b2568': {u'A': [True, 90.16089506172838]}}	[u'AF-P00803-F1-model_v2_&_NOBFS_0']	324	1	1	1
AF-P00804-F1-model_v2_&_NOBFS_0	ALPHAFOLD	{u'b0027': 1}	93.3208	{u'b0027': {u'A': [True, 93.32079268292684]}}	[u'AF-P00804-F1-model_v2_&_NOBFS_0']	164	1	1	1
AF-P00805-F1-model_v2_&_NOBFS_0	ALPHAFOLD	{u'b2957': 1}	94.7495	{u'b2957': {u'A': [True, 94.74951149425287]}}	[u'AF-P00805-F1-model_v2_&_NOBFS_0']	348	1	1	1
AF-P00811-F1-model_v2_&_NOBFS_0	ALPHAFOLD	{u'b4150': 1}	96.2047	{u'b4150': {u'A': [True, 96.20474801061009]}}	[u'AF-P00811-F1-model_v2_&_NOBFS_0']	377	1	1	1
AF-P00816-F1-model_v2_&_NOBFS_0	ALPHAFOLD	{u'b0340': 1}	98.186	{u'b0340': {u'A': [True, 98.18596153846156]}}	[u'AF-P00816-F1-model_v2_&_NOBFS_0']	156	1	1	1
AF-P00861-F1-model_v2_&_NOBFS_0	ALPHAFOLD	{u'b2838': 1}	95.3042	{u'b2838': {u'A': [True, 95.3042142857143]}}	[u'AF-P00861-F1-model_v2_&_NOBFS_0']	420	1	1	1
AF-P00864-F1-model_v2_&_NOBFS_0	ALPHAFOLD	{u'b3956': 1}	91.8636	{u'b3956': {u'A': [True, 91.86361268403172]}}	[u'AF-P00864-F1-model_v2_&_NOBFS_0']	883	1	1	1
AF-P00887-F1-model_v2_&_NOBFS_0	ALPHAFOLD	{u'b1704': 1}	96.6734	{u'b1704': {u'A': [True, 96.67344827586207]}}	[u'AF-P00887-F1-model_v2_&_NOBFS_0']	348	1	1	1
AF-P00888-F1-model_v2_&_NOBFS_0	ALPHAFOLD	{u'b2601': 1}	96.4736	{u'b2601': {u'A': [True, 96.47356741573033]}}	[u'AF-P00888-F1-model_v2_&_NOBFS_0']	356	1	1	1
AF-P00893-F1-model_v2_&_NOBFS_0	ALPHAFOLD	{u'b0077': 1}	96.9607	{u'b0077': {u'A': [True, 96.96073170731707]}}	[u'AF-P00893-F1-model_v2_&_NOBFS_0']	574	1	1	1
AF-P00894-F1-model_v2_&_NOBFS_0	ALPHAFOLD	{u'b0078': 1}	94.5792	{u'b0078': {u'A': [True, 94.57920245398773]}}	[u'AF-P00894-F1-model_v2_&_NOBFS_0']	163	1	1	1
AF-P00895-F1-model_v2_&_NOBFS_0	ALPHAFOLD	{u'b1264': 1}	94.8439	{u'b1264': {u'A': [True, 94.84386538461538]}}	[u'AF-P00895-F1-model_v2_&_NOBFS_0']	520	1	1	1
AF-P00903-F1-model_v2_&_NOBFS_0	ALPHAFOLD	{u'b3360': 1}	97.4429	{u'b3360': {u'A': [True, 97.4429411764706]}}	[u'AF-P00903-F1-model_v2_&_NOBFS_0']	187	1	1	1
AF-P00904-F1-model_v2_&_NOBFS_0	ALPHAFOLD	{u'b1263': 1}	92.8627	{u'b1263': {u'A': [True, 92.86267419962336]}}	[u'AF-P00904-F1-model_v2_&_NOBFS_0']	531	1	1	1
AF-P00909-F1-model_v2_&_NOBFS_0	ALPHAFOLD	{u'b1262': 1}	96.1506	{u'b1262': {u'A': [True, 96.15061810154525]}}	[u'AF-P00909-F1-model_v2_&_NOBFS_0']	453	1	1	1
AF-P00914-F1-model_v2_&_NOBFS_0	ALPHAFOLD	{u'b0708': 1}	97.204	{u'b0708': {u'A': [True, 97.20400423728812]}}	[u'AF-P00914-F1-model_v2_&_NOBFS_0']	472	1	1	1
AF-P00926-F1-model_v2_&_NOBFS_0	ALPHAFOLD	{u'b2366': 1}	96.307	{u'b2366': {u'A': [True, 96.30696832579184]}}	[u'AF-P00926-F1-model_v2_&_NOBFS_0']	442	1	1	1
AF-P00934-F1-model_v2_&_NOBFS_0	ALPHAFOLD	{u'b0004': 1}	96.0408	{u'b0004': {u'A': [True, 96.04077102803738]}}	[u'AF-P00934-F1-model_v2_&_NOBFS_0']	428	1	1	1
AF-P00935-F1-model_v2_&_NOBFS_0	ALPHAFOLD	{u'b3939': 1}	97.2145	{u'b3939': {u'A': [True, 97.21453367875647]}}	[u'AF-P00935-F1-model_v2_&_NOBFS_0']	386	1	1	1
AF-P00936-F1-model_v2_&_NOBFS_0	ALPHAFOLD	{u'b3806': 1}	83.5266	{u'b3806': {u'A': [True, 83.52659198113206]}}	[u'AF-P00936-F1-model_v2_&_NOBFS_0']	848	1	1	1
AF-P00944-F1-model_v2_&_NOBFS_0	ALPHAFOLD	{u'b3565': 1}	97.907	{u'b3565': {u'A': [True, 97.90704545454545]}}	[u'AF-P00944-F1-model_v2_&_NOBFS_0']	440	1	1	1
AF-P00946-F1-model_v2_&_NOBFS_0	ALPHAFOLD	{u'b1613': 1}	97.8288	{u'b1613': {u'A': [True, 97.82882352941178]}}	[u'AF-P00946-F1-model_v2_&_NOBFS_0']	391	1	1	1
AF-P00954-F1-model_v2_&_NOBFS_0	ALPHAFOLD	{u'b3384': 1}	95.0416	{u'b3384': {u'A': [True, 95.04164670658683]}}	[u'AF-P00954-F1-model_v2_&_NOBFS_0']	334	1	1	1
AF-P00956-F1-model_v2_&_NOBFS_0	ALPHAFOLD	{u'b0026': 1}	93.8756	{u'b0026': {u'A': [True, 93.87555437100214]}}	[u'AF-P00956-F1-model_v2_&_NOBFS_0']	938	1	1	1
AF-P00957-F1-model_v2_&_NOBFS_0	ALPHAFOLD	{u'b2697': 1}	90.6998	{u'b2697': {u'A': [True, 90.69976027397259]}}	[u'AF-P00957-F1-model_v2_&_NOBFS_0']	876	1	1	1
AF-P00959-F1-model_v2_&_NOBFS_0	ALPHAFOLD	{u'b2114': 1}	94.656	{u'b2114': {u'A': [True, 94.65601181683898]}}	[u'AF-P00959-F1-model_v2_&_NOBFS_0']	677	1	1	1
AF-P00960-F1-model_v2_&_NOBFS_0	ALPHAFOLD	{u'b3560': 1}	96.0445	{u'b3560': {u'A': [True, 96.04448844884489]}}	[u'AF-P00960-F1-model_v2_&_NOBFS_0']	303	1	1	1
AF-P00961-F1-model_v2_&_NOBFS_0	ALPHAFOLD	{u'b3559': 1}	94.8874	{u'b3559': {u'A': [True, 94.88740203193034]}}	[u'AF-P00961-F1-model_v2_&_NOBFS_0']	689	1	1	1
AF-P00962-F1-model_v2_&_NOBFS_0	ALPHAFOLD	{u'b0680': 1}	94.8136	{u'b0680': {u'A': [True, 94.81359205776174]}}	[u'AF-P00962-F1-model_v2_&_NOBFS_0']	554	1	1	1
AF-P00963-F1-model_v2_&_NOBFS_0	ALPHAFOLD	{u'b3744': 1}	97.664	{u'b3744': {u'A': [True, 97.6640303030303]}}	[u'AF-P00963-F1-model_v2_&_NOBFS_0']	330	1	1	1
AF-P00968-F1-model_v2_&_NOBFS_0	ALPHAFOLD	{u'b0033': 1}	95.327	{u'b0033': {u'A': [True, 95.32700838769804]}}	[u'AF-P00968-F1-model_v2_&_NOBFS_0']	1073	1	1	1
AF-P02338-F1-model_v2_&_NOBFS_0	ALPHAFOLD	{u'b1229': 1}	72.3172	{u'b1229': {u'A': [True, 72.31724137931033]}}	[u'AF-P02338-F1-model_v2_&_NOBFS_0']	29	1	1	1
AF-P02358-F1-model_v2_&_NOBFS_0	ALPHAFOLD	{u'b4200': 1}	91.0524	{u'b4200': {u'A': [True, 91.05237037037037]}}	[u'AF-P02358-F1-model_v2_&_NOBFS_0']	135	1	1	1
AF-P02359-F1-model_v2_&_NOBFS_0	ALPHAFOLD	{u'b3341': 1}	86.7133	{u'b3341': {u'A': [True, 86.71329608938548]}}	[u'AF-P02359-F1-model_v2_&_NOBFS_0']	179	1	1	1
AF-P02413-F1-model_v2_&_NOBFS_0	ALPHAFOLD	{u'b3301': 1}	93.3022	{u'b3301': {u'A': [True, 93.30222222222223]}}	[u'AF-P02413-F1-model_v2_&_NOBFS_0']	144	1	1	1
AF-P02916-F1-model_v2_&_NOBFS_0	ALPHAFOLD	{u'b4033': 1}	90.7837	{u'b4033': {u'A': [True, 90.78369649805447]}}	[u'AF-P02916-F1-model_v2_&_NOBFS_0']	514	1	1	1
AF-P02918-F1-model_v2_&_NOBFS_0	ALPHAFOLD	{u'b3396': 1}	90.3686	{u'b3396': {u'A': [True, 90.3686]}}	[u'AF-P02918-F1-model_v2_&_NOBFS_0']	850	1	1	1
AF-P02919-F1-model_v2_&_NOBFS_0	ALPHAFOLD	{u'b0149': 1}	87.473	{u'b0149': {u'A': [True, 87.47300947867299]}}	[u'AF-P02919-F1-model_v2_&_NOBFS_0']	844	1	1	1
AF-P02920-F1-model_v2_&_NOBFS_0	ALPHAFOLD	{u'b0343': 1}	81.8605	{u'b0343': {u'A': [True, 81.86052757793766]}}	[u'AF-P02920-F1-model_v2_&_NOBFS_0']	417	1	1	1
AF-P02921-F1-model_v2_&_NOBFS_0	ALPHAFOLD	{u'b4120': 1}	67.8507	{u'b4120': {u'A': [True, 67.85065539112051]}}	[u'AF-P02921-F1-model_v2_&_NOBFS_0']	473	1	1	1
AF-P02924-F1-model_v2_&_NOBFS_0	ALPHAFOLD	{u'b1901': 1}	94.4006	{u'b1901': {u'A': [True, 94.40063829787235]}}	[u'AF-P02924-F1-model_v2_&_NOBFS_0']	329	1	1	1
AF-P02925-F1-model_v2_&_NOBFS_0	ALPHAFOLD	{u'b3751': 1}	94.5239	{u'b3751': {u'A': [True, 94.52385135135134]}}	[u'AF-P02925-F1-model_v2_&_NOBFS_0']	296	1	1	1
AF-P02929-F1-model_v2_&_NOBFS_0	ALPHAFOLD	{u'b1252': 1}	75.7176	{u'b1252': {u'A': [True, 75.71757322175732]}}	[u'AF-P02929-F1-model_v2_&_NOBFS_0']	239	1	1	1
AF-P02930-F1-model_v2_&_NOBFS_0	ALPHAFOLD	{u'b3035': 1}	89.0432	{u'b3035': {u'A': [True, 89.0432251521298]}}	[u'AF-P02930-F1-model_v2_&_NOBFS_0']	493	1	1	1
AF-P02931-F1-model_v2_&_NOBFS_0	ALPHAFOLD	{u'b0929': 1}	94.3488	{u'b0929': {u'A': [True, 94.34875690607734]}}	[u'AF-P02931-F1-model_v2_&_NOBFS_0']	362	1	1	1
AF-P02932-F1-model_v2_&_NOBFS_0	ALPHAFOLD	{u'b0241': 1}	93.6567	{u'b0241': {u'A': [True, 93.65672364672363]}}	[u'AF-P02932-F1-model_v2_&_NOBFS_0']	351	1	1	1
AF-P02942-F1-model_v2_&_NOBFS_0	ALPHAFOLD	{u'b4355': 1}	87.8637	{u'b4355': {u'A': [True, 87.86366606170598]}}	[u'AF-P02942-F1-model_v2_&_NOBFS_0']	551	1	1	1
AF-P02943-F1-model_v2_&_NOBFS_0	ALPHAFOLD	{u'b4036': 1}	95.1305	{u'b4036': {u'A': [True, 95.13047085201794]}}	[u'AF-P02943-F1-model_v2_&_NOBFS_0']	446	1	1	1
AF-P03004-F1-model_v2_&_NOBFS_0	ALPHAFOLD	{u'b3702': 1}	87.2066	{u'b3702': {u'A': [True, 87.20659528907922]}}	[u'AF-P03004-F1-model_v2_&_NOBFS_0']	467	1	1	1
AF-P03007-F1-model_v2_&_NOBFS_0	ALPHAFOLD	{u'b0215': 1}	88.3146	{u'b0215': {u'A': [True, 88.31456790123458]}}	[u'AF-P03007-F1-model_v2_&_NOBFS_0']	243	1	1	1
AF-P03014-F1-model_v2_&_NOBFS_0	ALPHAFOLD	{u'b1158': 1}	82.2246	{u'b1158': {u'A': [True, 82.2245652173913]}}	[u'AF-P03014-F1-model_v2_&_NOBFS_0']	184	1	1	1
AF-P03018-F1-model_v2_&_NOBFS_0	ALPHAFOLD	{u'b3813': 1}	87.7892	{u'b3813': {u'A': [True, 87.78925000000001]}}	[u'AF-P03018-F1-model_v2_&_NOBFS_0']	720	1	1	1
AF-P03023-F1-model_v2_&_NOBFS_0	ALPHAFOLD	{u'b0345': 1}	93.8021	{u'b0345': {u'A': [True, 93.80208333333333]}}	[u'AF-P03023-F1-model_v2_&_NOBFS_0']	360	1	1	1
AF-P03024-F1-model_v2_&_NOBFS_0	ALPHAFOLD	{u'b2837': 1}	93.7241	{u'b2837': {u'A': [True, 93.724110787172]}}	[u'AF-P03024-F1-model_v2_&_NOBFS_0']	343	1	1	1
AF-P03030-F1-model_v2_&_NOBFS_0	ALPHAFOLD	{u'b2839': 1}	91.882	{u'b2839': {u'A': [True, 91.88199356913184]}}	[u'AF-P03030-F1-model_v2_&_NOBFS_0']	311	1	1	1
AF-P03061-F1-model_v2_&_NOBFS_0	ALPHAFOLD	{u'b3672': 1}	75.8341	{u'b3672': {u'A': [True, 75.83406249999999]}}	[u'AF-P03061-F1-model_v2_&_NOBFS_0']	32	1	1	1
AF-P03813-F1-model_v2_&_NOBFS_0	ALPHAFOLD	{u'b2840': 1}	97.207	{u'b2840': {u'A': [True, 97.20700000000001]}}	[u'AF-P03813-F1-model_v2_&_NOBFS_0']	230	1	1	1
AF-P03817-F1-model_v2_&_NOBFS_0	ALPHAFOLD	{u'b3742': 1}	85.0676	{u'b3742': {u'A': [True, 85.06761904761903]}}	[u'AF-P03817-F1-model_v2_&_NOBFS_0']	147	1	1	1
AF-P03819-F1-model_v2_&_NOBFS_0	ALPHAFOLD	{u'b0047': 1}	83.2373	{u'b0047': {u'A': [True, 83.23727419354839]}}	[u'AF-P03819-F1-model_v2_&_NOBFS_0']	620	1	1	1
AF-P03825-F1-model_v2_&_NOBFS_0	ALPHAFOLD	{u'b3322': 1}	67.1718	{u'b3322': {u'A': [True, 67.17179856115109]}}	[u'AF-P03825-F1-model_v2_&_NOBFS_0']	139	1	1	1
AF-P03835-F1-model_v2_&_NOBFS_0	ALPHAFOLD	{u'b4278': 1}	87.9448	{u'b4278': {u'A': [True, 87.94481900452489]}}	[u'AF-P03835-F1-model_v2_&_NOBFS_0']	442	1	1	1
AF-P03841-F1-model_v2_&_NOBFS_0	ALPHAFOLD	{u'b4037': 1}	81.1371	{u'b4037': {u'A': [True, 81.13712418300653]}}	[u'AF-P03841-F1-model_v2_&_NOBFS_0']	306	1	1	1
AF-P03959-F1-model_v2_&_NOBFS_0	ALPHAFOLD	{u'b0698': 1}	97.6782	{u'b0698': {u'A': [True, 97.67824057450628]}}	[u'AF-P03959-F1-model_v2_&_NOBFS_0']	557	1	1	1
AF-P03960-F1-model_v2_&_NOBFS_0	ALPHAFOLD	{u'b0697': 1}	86.3171	{u'b0697': {u'A': [True, 86.31706744868035]}}	[u'AF-P03960-F1-model_v2_&_NOBFS_0']	682	1	1	1
AF-P03961-F1-model_v2_&_NOBFS_0	ALPHAFOLD	{u'b0696': 1}	95.4364	{u'b0696': {u'A': [True, 95.43636842105265]}}	[u'AF-P03961-F1-model_v2_&_NOBFS_0']	190	1	1	1
AF-P04036-F1-model_v2_&_NOBFS_0	ALPHAFOLD	{u'b0031': 1}	95.772	{u'b0031': {u'A': [True, 95.77201465201465]}}	[u'AF-P04036-F1-model_v2_&_NOBFS_0']	273	1	1	1
AF-P04079-F1-model_v2_&_NOBFS_0	ALPHAFOLD	{u'b2507': 1}	90.7109	{u'b2507': {u'A': [True, 90.7109142857143]}}	[u'AF-P04079-F1-model_v2_&_NOBFS_0']	525	1	1	1
AF-P04128-F1-model_v2_&_NOBFS_0	ALPHAFOLD	{u'b4314': 1}	84.1487	{u'b4314': {u'A': [True, 84.14873626373627]}}	[u'AF-P04128-F1-model_v2_&_NOBFS_0']	182	1	1	1
AF-P04152-F1-model_v2_&_NOBFS_0	ALPHAFOLD	{u'b1184': 1}	92.525	{u'b1184': {u'A': [True, 92.52502369668248]}}	[u'AF-P04152-F1-model_v2_&_NOBFS_0']	422	1	1	1
AF-P04335-F1-model_v2_&_NOBFS_0	ALPHAFOLD	{u'b0239': 1}	94.2062	{u'b0239': {u'A': [True, 94.20618357487923]}}	[u'AF-P04335-F1-model_v2_&_NOBFS_0']	414	1	1	1
AF-P04391-F1-model_v2_&_NOBFS_0	ALPHAFOLD	{u'b4254': 1}	96.1321	{u'b4254': {u'A': [True, 96.13209580838323]}}	[u'AF-P04391-F1-model_v2_&_NOBFS_0']	334	1	1	1
AF-P04395-F1-model_v2_&_NOBFS_0	ALPHAFOLD	{u'b2068': 1}	96.8037	{u'b2068': {u'A': [True, 96.8036524822695]}}	[u'AF-P04395-F1-model_v2_&_NOBFS_0']	282	1	1	1
AF-P04425-F1-model_v2_&_NOBFS_0	ALPHAFOLD	{u'b2947': 1}	95.4875	{u'b2947': {u'A': [True, 95.48753164556962]}}	[u'AF-P04425-F1-model_v2_&_NOBFS_0']	316	1	1	1
AF-P04693-F1-model_v2_&_NOBFS_0	ALPHAFOLD	{u'b4054': 1}	97.9821	{u'b4054': {u'A': [True, 97.9821410579345]}}	[u'AF-P04693-F1-model_v2_&_NOBFS_0']	397	1	1	1
AF-P04805-F1-model_v2_&_NOBFS_0	ALPHAFOLD	{u'b2400': 1}	94.71	{u'b2400': {u'A': [True, 94.70997876857749]}}	[u'AF-P04805-F1-model_v2_&_NOBFS_0']	471	1	1	1
AF-P04816-F1-model_v2_&_NOBFS_0	ALPHAFOLD	{u'b3458': 1}	94.8296	{u'b3458': {u'A': [True, 94.82959349593494]}}	[u'AF-P04816-F1-model_v2_&_NOBFS_0']	369	1	1	1
AF-P04825-F1-model_v2_&_NOBFS_0	ALPHAFOLD	{u'b0932': 1}	96.6009	{u'b0932': {u'A': [True, 96.60085057471265]}}	[u'AF-P04825-F1-model_v2_&_NOBFS_0']	870	1	1	1
AF-P04846-F1-model_v2_&_NOBFS_0	ALPHAFOLD	{u'b3661': 1}	91.306	{u'b3661': {u'A': [True, 91.30595588235295]}}	[u'AF-P04846-F1-model_v2_&_NOBFS_0']	272	1	1	1
AF-P04949-F1-model_v2_&_NOBFS_0	ALPHAFOLD	{u'b1923': 1}	87.9402	{u'b1923': {u'A': [True, 87.94022088353412]}}	[u'AF-P04949-F1-model_v2_&_NOBFS_0']	498	1	1	1
AF-P04951-F1-model_v2_&_NOBFS_0	ALPHAFOLD	{u'b0918': 1}	95.8743	{u'b0918': {u'A': [True, 95.87431451612902]}}	[u'AF-P04951-F1-model_v2_&_NOBFS_0']	248	1	1	1
AF-P04968-F1-model_v2_&_NOBFS_0	ALPHAFOLD	{u'b3772': 1}	90.0849	{u'b3772': {u'A': [True, 90.08490272373541]}}	[u'AF-P04968-F1-model_v2_&_NOBFS_0']	514	1	1	1
AF-P04982-F1-model_v2_&_NOBFS_0	ALPHAFOLD	{u'b3748': 1}	97.7356	{u'b3748': {u'A': [True, 97.73561151079137]}}	[u'AF-P04982-F1-model_v2_&_NOBFS_0']	139	1	1	1
AF-P04983-F1-model_v2_&_NOBFS_0	ALPHAFOLD	{u'b3749': 1}	89.8618	{u'b3749': {u'A': [True, 89.86177644710578]}}	[u'AF-P04983-F1-model_v2_&_NOBFS_0']	501	1	1	1
AF-P04993-F1-model_v2_&_NOBFS_0	ALPHAFOLD	{u'b2819': 1}	88.2314	{u'b2819': {u'A': [True, 88.23136513157894]}}	[u'AF-P04993-F1-model_v2_&_NOBFS_0']	608	1	1	1
AF-P04994-F1-model_v2_&_NOBFS_0	ALPHAFOLD	{u'b2509': 1}	87.1595	{u'b2509': {u'A': [True, 87.15945175438598]}}	[u'AF-P04994-F1-model_v2_&_NOBFS_0']	456	1	1	1
AF-P04995-F1-model_v2_&_NOBFS_0	ALPHAFOLD	{u'b2011': 1}	95.6462	{u'b2011': {u'A': [True, 95.64621052631578]}}	[u'AF-P04995-F1-model_v2_&_NOBFS_0']	475	1	1	1
AF-P05020-F1-model_v2_&_NOBFS_0	ALPHAFOLD	{u'b1062': 1}	96.9899	{u'b1062': {u'A': [True, 96.98994252873563]}}	[u'AF-P05020-F1-model_v2_&_NOBFS_0']	348	1	1	1
AF-P05041-F1-model_v2_&_NOBFS_0	ALPHAFOLD	{u'b1812': 1}	94.5983	{u'b1812': {u'A': [True, 94.59834437086091]}}	[u'AF-P05041-F1-model_v2_&_NOBFS_0']	453	1	1	1
AF-P05042-F1-model_v2_&_NOBFS_0	ALPHAFOLD	{u'b1611': 1}	96.8584	{u'b1611': {u'A': [True, 96.8584154175589]}}	[u'AF-P05042-F1-model_v2_&_NOBFS_0']	467	1	1	1
AF-P05050-F1-model_v2_&_NOBFS_0	ALPHAFOLD	{u'b2212': 1}	95.9722	{u'b2212': {u'A': [True, 95.97217592592594]}}	[u'AF-P05050-F1-model_v2_&_NOBFS_0']	216	1	1	1
AF-P05052-F1-model_v2_&_NOBFS_0	ALPHAFOLD	{u'b0564': 1}	89.2086	{u'b0564': {u'A': [True, 89.20855421686747]}}	[u'AF-P05052-F1-model_v2_&_NOBFS_0']	249	1	1	1
AF-P05055-F1-model_v2_&_NOBFS_0	ALPHAFOLD	{u'b3164': 1}	92.2323	{u'b3164': {u'A': [True, 92.23229254571027]}}	[u'AF-P05055-F1-model_v2_&_NOBFS_0']	711	1	1	1
AF-P05100-F1-model_v2_&_NOBFS_0	ALPHAFOLD	{u'b3549': 1}	97.3825	{u'b3549': {u'A': [True, 97.38245989304811]}}	[u'AF-P05100-F1-model_v2_&_NOBFS_0']	187	1	1	1
AF-P05194-F1-model_v2_&_NOBFS_0	ALPHAFOLD	{u'b1693': 1}	97.7838	{u'b1693': {u'A': [True, 97.78376984126983]}}	[u'AF-P05194-F1-model_v2_&_NOBFS_0']	252	1	1	1
AF-P05458-F1-model_v2_&_NOBFS_0	ALPHAFOLD	{u'b2821': 1}	93.498	{u'b2821': {u'A': [True, 93.49795218295218]}}	[u'AF-P05458-F1-model_v2_&_NOBFS_0']	962	1	1	1
AF-P05459-F1-model_v2_&_NOBFS_0	ALPHAFOLD	{u'b2320': 1}	96.8937	{u'b2320': {u'A': [True, 96.89370370370371]}}	[u'AF-P05459-F1-model_v2_&_NOBFS_0']	378	1	1	1
AF-P05523-F1-model_v2_&_NOBFS_0	ALPHAFOLD	{u'b3635': 1}	92.3414	{u'b3635': {u'A': [True, 92.34137546468402]}}	[u'AF-P05523-F1-model_v2_&_NOBFS_0']	269	1	1	1
AF-P05637-F1-model_v2_&_NOBFS_0	ALPHAFOLD	{u'b0049': 1}	94.8306	{u'b0049': {u'A': [True, 94.83060714285715]}}	[u'AF-P05637-F1-model_v2_&_NOBFS_0']	280	1	1	1
AF-P05704-F1-model_v2_&_NOBFS_0	ALPHAFOLD	{u'b1421': 1}	88.9849	{u'b1421': {u'A': [True, 88.9848717948718]}}	[u'AF-P05704-F1-model_v2_&_NOBFS_0']	546	1	1	1
AF-P05706-F1-model_v2_&_NOBFS_0	ALPHAFOLD	{u'b2704': 1}	88.0276	{u'b2704': {u'A': [True, 88.02756097560976]}}	[u'AF-P05706-F1-model_v2_&_NOBFS_0']	123	1	1	1
AF-P05707-F1-model_v2_&_NOBFS_0	ALPHAFOLD	{u'b2705': 1}	97.7075	{u'b2705': {u'A': [True, 97.70745173745173]}}	[u'AF-P05707-F1-model_v2_&_NOBFS_0']	259	1	1	1
AF-P05719-F1-model_v2_&_NOBFS_0	ALPHAFOLD	{u'b4348': 1}	93.3869	{u'b4348': {u'A': [True, 93.38689655172415]}}	[u'AF-P05719-F1-model_v2_&_NOBFS_0']	464	1	1	1
AF-P05791-F1-model_v2_&_NOBFS_0	ALPHAFOLD	{u'b3771': 1}	96.0203	{u'b3771': {u'A': [True, 96.0203409090909]}}	[u'AF-P05791-F1-model_v2_&_NOBFS_0']	616	1	1	1
AF-P05793-F1-model_v2_&_NOBFS_0	ALPHAFOLD	{u'b3774': 1}	95.8155	{u'b3774': {u'A': [True, 95.81549898167005]}}	[u'AF-P05793-F1-model_v2_&_NOBFS_0']	491	1	1	1
AF-P05804-F1-model_v2_&_NOBFS_0	ALPHAFOLD	{u'b1617': 1}	96.2517	{u'b1617': {u'A': [True, 96.25169154228857]}}	[u'AF-P05804-F1-model_v2_&_NOBFS_0']	603	1	1	1
AF-P05824-F1-model_v2_&_NOBFS_0	ALPHAFOLD	{u'b2616': 1}	89.4175	{u'b2616': {u'A': [True, 89.41746835443038]}}	[u'AF-P05824-F1-model_v2_&_NOBFS_0']	553	1	1	1
AF-P05825-F1-model_v2_&_NOBFS_0	ALPHAFOLD	{u'b0584': 1}	93.1409	{u'b0584': {u'A': [True, 93.14093833780161]}}	[u'AF-P05825-F1-model_v2_&_NOBFS_0']	746	1	1	1
AF-P05827-F1-model_v2_&_NOBFS_0	ALPHAFOLD	{u'b3773': 1}	91.5046	{u'b3773': {u'A': [True, 91.50461279461278]}}	[u'AF-P05827-F1-model_v2_&_NOBFS_0']	297	1	1	1
AF-P05847-F1-model_v2_&_NOBFS_0	ALPHAFOLD	{u'b3061': 1}	96.4556	{u'b3061': {u'A': [True, 96.45557755775577]}}	[u'AF-P05847-F1-model_v2_&_NOBFS_0']	303	1	1	1
AF-P05852-F1-model_v2_&_NOBFS_0	ALPHAFOLD	{u'b3064': 1}	96.6426	{u'b3064': {u'A': [True, 96.6426112759644]}}	[u'AF-P05852-F1-model_v2_&_NOBFS_0']	337	1	1	1
AF-P06129-F1-model_v2_&_NOBFS_0	ALPHAFOLD	{u'b3966': 1}	91.1047	{u'b3966': {u'A': [True, 91.10469055374593]}}	[u'AF-P06129-F1-model_v2_&_NOBFS_0']	614	1	1	1
AF-P06134-F1-model_v2_&_NOBFS_0	ALPHAFOLD	{u'b2213': 1}	81.5377	{u'b2213': {u'A': [True, 81.53765536723165]}}	[u'AF-P06134-F1-model_v2_&_NOBFS_0']	354	1	1	1
AF-P06136-F1-model_v2_&_NOBFS_0	ALPHAFOLD	{u'b0093': 1}	85.3859	{u'b0093': {u'A': [True, 85.38590579710146]}}	[u'AF-P06136-F1-model_v2_&_NOBFS_0']	276	1	1	1
AF-P06149-F1-model_v2_&_NOBFS_0	ALPHAFOLD	{u'b2133': 1}	93.3386	{u'b2133': {u'A': [True, 93.3385989492119]}}	[u'AF-P06149-F1-model_v2_&_NOBFS_0']	571	1	1	1
AF-P06282-F1-model_v2_&_NOBFS_0	ALPHAFOLD	{u'b3918': 1}	94.5986	{u'b3918': {u'A': [True, 94.59856573705179]}}	[u'AF-P06282-F1-model_v2_&_NOBFS_0']	251	1	1	1
AF-P06609-F1-model_v2_&_NOBFS_0	ALPHAFOLD	{u'b1711': 1}	92.0831	{u'b1711': {u'A': [True, 92.08306748466258]}}	[u'AF-P06609-F1-model_v2_&_NOBFS_0']	326	1	1	1
AF-P06610-F1-model_v2_&_NOBFS_0	ALPHAFOLD	{u'b1710': 1}	97.0371	{u'b1710': {u'A': [True, 97.03710382513661]}}	[u'AF-P06610-F1-model_v2_&_NOBFS_0']	183	1	1	1
AF-P06611-F1-model_v2_&_NOBFS_0	ALPHAFOLD	{u'b1709': 1}	96.6349	{u'b1709': {u'A': [True, 96.63489959839357]}}	[u'AF-P06611-F1-model_v2_&_NOBFS_0']	249	1	1	1
AF-P06612-F1-model_v2_&_NOBFS_0	ALPHAFOLD	{u'b1274': 1}	90.2235	{u'b1274': {u'A': [True, 90.22346820809248]}}	[u'AF-P06612-F1-model_v2_&_NOBFS_0']	865	1	1	1
AF-P06616-F1-model_v2_&_NOBFS_0	ALPHAFOLD	{u'b2566': 1}	87.1801	{u'b2566': {u'A': [True, 87.18009966777409]}}	[u'AF-P06616-F1-model_v2_&_NOBFS_0']	301	1	1	1
AF-P06709-F1-model_v2_&_NOBFS_0	ALPHAFOLD	{u'b3973': 1}	94.6239	{u'b3973': {u'A': [True, 94.62386292834891]}}	[u'AF-P06709-F1-model_v2_&_NOBFS_0']	321	1	1	1
AF-P06710-F1-model_v2_&_NOBFS_0	ALPHAFOLD	{u'b0470': 1}	78.5859	{u'b0470': {u'A': [True, 78.58592534992223]}}	[u'AF-P06710-F1-model_v2_&_NOBFS_0']	643	1	1	1
AF-P06715-F1-model_v2_&_NOBFS_0	ALPHAFOLD	{u'b3500': 1}	98.3161	{u'b3500': {u'A': [True, 98.31611111111111]}}	[u'AF-P06715-F1-model_v2_&_NOBFS_0']	450	1	1	1
AF-P06720-F1-model_v2_&_NOBFS_0	ALPHAFOLD	{u'b4119': 1}	95.9328	{u'b4119': {u'A': [True, 95.93279379157428]}}	[u'AF-P06720-F1-model_v2_&_NOBFS_0']	451	1	1	1
AF-P06721-F1-model_v2_&_NOBFS_0	ALPHAFOLD	{u'b3008': 1}	98.2732	{u'b3008': {u'A': [True, 98.27316455696203]}}	[u'AF-P06721-F1-model_v2_&_NOBFS_0']	395	1	1	1
AF-P06722-F1-model_v2_&_NOBFS_0	ALPHAFOLD	{u'b2831': 1}	92.7931	{u'b2831': {u'A': [True, 92.79310043668123]}}	[u'AF-P06722-F1-model_v2_&_NOBFS_0']	229	1	1	1
AF-P06846-F1-model_v2_&_NOBFS_0	ALPHAFOLD	{u'b3075': 1}	92.0298	{u'b3075': {u'A': [True, 92.02975535168196]}}	[u'AF-P06846-F1-model_v2_&_NOBFS_0']	327	1	1	1
AF-P06864-F1-model_v2_&_NOBFS_0	ALPHAFOLD	{u'b3076': 1}	95.678	{u'b3076': {u'A': [True, 95.67803883495147]}}	[u'AF-P06864-F1-model_v2_&_NOBFS_0']	1030	1	1	1
AF-P06959-F1-model_v2_&_NOBFS_0	ALPHAFOLD	{u'b0115': 1}	76.9876	{u'b0115': {u'A': [True, 76.98761904761905]}}	[u'AF-P06959-F1-model_v2_&_NOBFS_0']	630	1	1	1
AF-P06960-F1-model_v2_&_NOBFS_0	ALPHAFOLD	{u'b0273': 1}	96.2421	{u'b0273': {u'A': [True, 96.24209580838324]}}	[u'AF-P06960-F1-model_v2_&_NOBFS_0']	334	1	1	1
AF-P06961-F1-model_v2_&_NOBFS_0	ALPHAFOLD	{u'b3056': 1}	94.5849	{u'b3056': {u'A': [True, 94.58490291262135]}}	[u'AF-P06961-F1-model_v2_&_NOBFS_0']	412	1	1	1
AF-P06965-F1-model_v2_&_NOBFS_0	ALPHAFOLD	{u'b1569': 1}	88.8187	{u'b1569': {u'A': [True, 88.81868421052631]}}	[u'AF-P06965-F1-model_v2_&_NOBFS_0']	76	1	1	1
AF-P06966-F1-model_v2_&_NOBFS_0	ALPHAFOLD	{u'b1570': 1}	90.5407	{u'b1570': {u'A': [True, 90.54074074074074]}}	[u'AF-P06966-F1-model_v2_&_NOBFS_0']	135	1	1	1
AF-P06968-F1-model_v2_&_NOBFS_0	ALPHAFOLD	{u'b3640': 1}	97.6131	{u'b3640': {u'A': [True, 97.61309210526315]}}	[u'AF-P06968-F1-model_v2_&_NOBFS_0']	152	1	1	1
AF-P06971-F1-model_v2_&_NOBFS_0	ALPHAFOLD	{u'b0150': 1}	93.9347	{u'b0150': {u'A': [True, 93.93471218206157]}}	[u'AF-P06971-F1-model_v2_&_NOBFS_0']	747	1	1	1
AF-P06972-F1-model_v2_&_NOBFS_0	ALPHAFOLD	{u'b0153': 1}	86.6586	{u'b0153': {u'A': [True, 86.65863636363636]}}	[u'AF-P06972-F1-model_v2_&_NOBFS_0']	660	1	1	1
AF-P06974-F1-model_v2_&_NOBFS_0	ALPHAFOLD	{u'b1945': 1}	83.6768	{u'b1945': {u'A': [True, 83.67682634730538]}}	[u'AF-P06974-F1-model_v2_&_NOBFS_0']	334	1	1	1
AF-P06983-F1-model_v2_&_NOBFS_0	ALPHAFOLD	{u'b3805': 1}	93.7375	{u'b3805': {u'A': [True, 93.73750798722045]}}	[u'AF-P06983-F1-model_v2_&_NOBFS_0']	313	1	1	1
AF-P06986-F1-model_v2_&_NOBFS_0	ALPHAFOLD	{u'b2021': 1}	96.236	{u'b2021': {u'A': [True, 96.23601123595506]}}	[u'AF-P06986-F1-model_v2_&_NOBFS_0']	356	1	1	1
AF-P06987-F1-model_v2_&_NOBFS_0	ALPHAFOLD	{u'b2022': 1}	94.9943	{u'b2022': {u'A': [True, 94.99433802816903]}}	[u'AF-P06987-F1-model_v2_&_NOBFS_0']	355	1	1	1
AF-P06988-F1-model_v2_&_NOBFS_0	ALPHAFOLD	{u'b2020': 1}	96.0788	{u'b2020': {u'A': [True, 96.07877880184333]}}	[u'AF-P06988-F1-model_v2_&_NOBFS_0']	434	1	1	1
AF-P06989-F1-model_v2_&_NOBFS_0	ALPHAFOLD	{u'b2026': 1}	97.0732	{u'b2026': {u'A': [True, 97.07320197044335]}}	[u'AF-P06989-F1-model_v2_&_NOBFS_0']	203	1	1	1
AF-P06992-F1-model_v2_&_NOBFS_0	ALPHAFOLD	{u'b0051': 1}	94.1646	{u'b0051': {u'A': [True, 94.16457875457876]}}	[u'AF-P06992-F1-model_v2_&_NOBFS_0']	273	1	1	1
AF-P06993-F1-model_v2_&_NOBFS_0	ALPHAFOLD	{u'b3418': 1}	88.7835	{u'b3418': {u'A': [True, 88.78345172031077]}}	[u'AF-P06993-F1-model_v2_&_NOBFS_0']	901	1	1	1
AF-P06996-F1-model_v2_&_NOBFS_0	ALPHAFOLD	{u'b2215': 1}	93.4729	{u'b2215': {u'A': [True, 93.47291553133515]}}	[u'AF-P06996-F1-model_v2_&_NOBFS_0']	367	1	1	1
AF-P06999-F1-model_v2_&_NOBFS_0	ALPHAFOLD	{u'b1723': 1}	95.797	{u'b1723': {u'A': [True, 95.7970226537217]}}	[u'AF-P06999-F1-model_v2_&_NOBFS_0']	309	1	1	1
AF-P07000-F1-model_v2_&_NOBFS_0	ALPHAFOLD	{u'b3825': 1}	94.5682	{u'b3825': {u'A': [True, 94.56823529411766]}}	[u'AF-P07000-F1-model_v2_&_NOBFS_0']	340	1	1	1
AF-P07001-F1-model_v2_&_NOBFS_0	ALPHAFOLD	{u'b1603': 1}	91.2798	{u'b1603': {u'A': [True, 91.27982352941176]}}	[u'AF-P07001-F1-model_v2_&_NOBFS_0']	510	1	1	1
AF-P07003-F1-model_v2_&_NOBFS_0	ALPHAFOLD	{u'b0871': 1}	94.7518	{u'b0871': {u'A': [True, 94.75181818181818]}}	[u'AF-P07003-F1-model_v2_&_NOBFS_0']	572	1	1	1
AF-P07004-F1-model_v2_&_NOBFS_0	ALPHAFOLD	{u'b0243': 1}	95.7359	{u'b0243': {u'A': [True, 95.7358752997602]}}	[u'AF-P07004-F1-model_v2_&_NOBFS_0']	417	1	1	1
AF-P07010-F1-model_v2_&_NOBFS_0	ALPHAFOLD	{u'b1561': 1}	75.2581	{u'b1561': {u'A': [True, 75.25807228915663]}}	[u'AF-P07010-F1-model_v2_&_NOBFS_0']	83	1	1	1
AF-P07012-F1-model_v2_&_NOBFS_0	ALPHAFOLD	{u'b2891': 1}	86.2241	{u'b2891': {u'A': [True, 86.22408219178082]}}	[u'AF-P07012-F1-model_v2_&_NOBFS_0']	365	1	1	1
AF-P07013-F1-model_v2_&_NOBFS_0	ALPHAFOLD	{u'b4201': 1}	94.524	{u'b4201': {u'A': [True, 94.52403846153847]}}	[u'AF-P07013-F1-model_v2_&_NOBFS_0']	104	1	1	1
AF-P07014-F1-model_v2_&_NOBFS_0	ALPHAFOLD	{u'b0724': 1}	96.5027	{u'b0724': {u'A': [True, 96.50268907563024]}}	[u'AF-P07014-F1-model_v2_&_NOBFS_0']	238	1	1	1
AF-P07017-F1-model_v2_&_NOBFS_0	ALPHAFOLD	{u'b1886': 1}	86.6879	{u'b1886': {u'A': [True, 86.68790235081373]}}	[u'AF-P07017-F1-model_v2_&_NOBFS_0']	553	1	1	1
AF-P07018-F1-model_v2_&_NOBFS_0	ALPHAFOLD	{u'b1885': 1}	88.5232	{u'b1885': {u'A': [True, 88.52324577861162]}}	[u'AF-P07018-F1-model_v2_&_NOBFS_0']	533	1	1	1
AF-P07021-F1-model_v2_&_NOBFS_0	ALPHAFOLD	{u'b2605': 1}	90.0049	{u'b2605': {u'A': [True, 90.00493750000001]}}	[u'AF-P07021-F1-model_v2_&_NOBFS_0']	160	1	1	1
AF-P07023-F1-model_v2_&_NOBFS_0	ALPHAFOLD	{u'b2600': 1}	94.1274	{u'b2600': {u'A': [True, 94.12737265415551]}}	[u'AF-P07023-F1-model_v2_&_NOBFS_0']	373	1	1	1
AF-P07024-F1-model_v2_&_NOBFS_0	ALPHAFOLD	{u'b0480': 1}	94.4883	{u'b0480': {u'A': [True, 94.48827272727272]}}	[u'AF-P07024-F1-model_v2_&_NOBFS_0']	550	1	1	1
AF-P07026-F1-model_v2_&_NOBFS_0	ALPHAFOLD	{u'b1916': 1}	94.872	{u'b1916': {u'A': [True, 94.872]}}	[u'AF-P07026-F1-model_v2_&_NOBFS_0']	240	1	1	1
AF-P07102-F1-model_v2_&_NOBFS_0	ALPHAFOLD	{u'b0980': 1}	95.6275	{u'b0980': {u'A': [True, 95.62747685185185]}}	[u'AF-P07102-F1-model_v2_&_NOBFS_0']	432	1	1	1
AF-P07109-F1-model_v2_&_NOBFS_0	ALPHAFOLD	{u'b2306': 1}	96.2442	{u'b2306': {u'A': [True, 96.24424124513618]}}	[u'AF-P07109-F1-model_v2_&_NOBFS_0']	257	1	1	1
AF-P07117-F1-model_v2_&_NOBFS_0	ALPHAFOLD	{u'b1015': 1}	93.3829	{u'b1015': {u'A': [True, 93.38292828685258]}}	[u'AF-P07117-F1-model_v2_&_NOBFS_0']	502	1	1	1
AF-P07118-F1-model_v2_&_NOBFS_0	ALPHAFOLD	{u'b4258': 1}	93.6225	{u'b4258': {u'A': [True, 93.62249211356468]}}	[u'AF-P07118-F1-model_v2_&_NOBFS_0']	951	1	1	1
AF-P07330-F1-model_v2_&_NOBFS_0	ALPHAFOLD	{u'b1883': 1}	92.333	{u'b1883': {u'A': [True, 92.33303724928366]}}	[u'AF-P07330-F1-model_v2_&_NOBFS_0']	349	1	1	1
AF-P07363-F1-model_v2_&_NOBFS_0	ALPHAFOLD	{u'b1888': 1}	81.239	{u'b1888': {u'A': [True, 81.23896024464831]}}	[u'AF-P07363-F1-model_v2_&_NOBFS_0']	654	1	1	1
AF-P07364-F1-model_v2_&_NOBFS_0	ALPHAFOLD	{u'b1884': 1}	93.124	{u'b1884': {u'A': [True, 93.12402097902098]}}	[u'AF-P07364-F1-model_v2_&_NOBFS_0']	286	1	1	1
AF-P07395-F1-model_v2_&_NOBFS_0	ALPHAFOLD	{u'b1713': 1}	94.7267	{u'b1713': {u'A': [True, 94.72667924528302]}}	[u'AF-P07395-F1-model_v2_&_NOBFS_0']	795	1	1	1
AF-P07464-F1-model_v2_&_NOBFS_0	ALPHAFOLD	{u'b0342': 1}	97.2244	{u'b0342': {u'A': [True, 97.22443349753694]}}	[u'AF-P07464-F1-model_v2_&_NOBFS_0']	203	1	1	1
AF-P07604-F1-model_v2_&_NOBFS_0	ALPHAFOLD	{u'b1323': 1}	86.992	{u'b1323': {u'A': [True, 86.99202729044835]}}	[u'AF-P07604-F1-model_v2_&_NOBFS_0']	513	1	1	1
AF-P07623-F1-model_v2_&_NOBFS_0	ALPHAFOLD	{u'b4013': 1}	92.5643	{u'b4013': {u'A': [True, 92.5642718446602]}}	[u'AF-P07623-F1-model_v2_&_NOBFS_0']	309	1	1	1
AF-P07639-F1-model_v2_&_NOBFS_0	ALPHAFOLD	{u'b3389': 1}	95.8026	{u'b3389': {u'A': [True, 95.80262430939227]}}	[u'AF-P07639-F1-model_v2_&_NOBFS_0']	362	1	1	1
AF-P07648-F1-model_v2_&_NOBFS_0	ALPHAFOLD	{u'b2822': 1}	91.5648	{u'b2822': {u'A': [True, 91.56483065953654]}}	[u'AF-P07648-F1-model_v2_&_NOBFS_0']	1122	1	1	1
AF-P07649-F1-model_v2_&_NOBFS_0	ALPHAFOLD	{u'b2318': 1}	96.2206	{u'b2318': {u'A': [True, 96.2205925925926]}}	[u'AF-P07649-F1-model_v2_&_NOBFS_0']	270	1	1	1
AF-P07650-F1-model_v2_&_NOBFS_0	ALPHAFOLD	{u'b4382': 1}	96.616	{u'b4382': {u'A': [True, 96.61604545454544]}}	[u'AF-P07650-F1-model_v2_&_NOBFS_0']	440	1	1	1
AF-P07654-F1-model_v2_&_NOBFS_0	ALPHAFOLD	{u'b3726': 1}	90.5569	{u'b3726': {u'A': [True, 90.55685810810812]}}	[u'AF-P07654-F1-model_v2_&_NOBFS_0']	296	1	1	1
AF-P07762-F1-model_v2_&_NOBFS_0	ALPHAFOLD	{u'b3432': 1}	95.9544	{u'b3432': {u'A': [True, 95.95440934065934]}}	[u'AF-P07762-F1-model_v2_&_NOBFS_0']	728	1	1	1
AF-P07813-F1-model_v2_&_NOBFS_0	ALPHAFOLD	{u'b0642': 1}	93.5097	{u'b0642': {u'A': [True, 93.50974418604652]}}	[u'AF-P07813-F1-model_v2_&_NOBFS_0']	860	1	1	1
AF-P07821-F1-model_v2_&_NOBFS_0	ALPHAFOLD	{u'b0151': 1}	92.4151	{u'b0151': {u'A': [True, 92.41509433962264]}}	[u'AF-P07821-F1-model_v2_&_NOBFS_0']	265	1	1	1
AF-P07822-F1-model_v2_&_NOBFS_0	ALPHAFOLD	{u'b0152': 1}	93.6544	{u'b0152': {u'A': [True, 93.65435810810811]}}	[u'AF-P07822-F1-model_v2_&_NOBFS_0']	296	1	1	1
AF-P07862-F1-model_v2_&_NOBFS_0	ALPHAFOLD	{u'b0092': 1}	94.8733	{u'b0092': {u'A': [True, 94.87330065359477]}}	[u'AF-P07862-F1-model_v2_&_NOBFS_0']	306	1	1	1
AF-P07913-F1-model_v2_&_NOBFS_0	ALPHAFOLD	{u'b3616': 1}	97.423	{u'b3616': {u'A': [True, 97.42304985337243]}}	[u'AF-P07913-F1-model_v2_&_NOBFS_0']	341	1	1	1
AF-P08142-F1-model_v2_&_NOBFS_0	ALPHAFOLD	{u'b3671': 1}	95.656	{u'b3671': {u'A': [True, 95.65596085409253]}}	[u'AF-P08142-F1-model_v2_&_NOBFS_0']	562	1	1	1
AF-P08178-F1-model_v2_&_NOBFS_0	ALPHAFOLD	{u'b2499': 1}	96.0085	{u'b2499': {u'A': [True, 96.00849275362319]}}	[u'AF-P08178-F1-model_v2_&_NOBFS_0']	345	1	1	1
AF-P08179-F1-model_v2_&_NOBFS_0	ALPHAFOLD	{u'b2500': 1}	97.0062	{u'b2500': {u'A': [True, 97.00617924528301]}}	[u'AF-P08179-F1-model_v2_&_NOBFS_0']	212	1	1	1
AF-P08189-F1-model_v2_&_NOBFS_0	ALPHAFOLD	{u'b4318': 1}	85.5203	{u'b4318': {u'A': [True, 85.5202840909091]}}	[u'AF-P08189-F1-model_v2_&_NOBFS_0']	176	1	1	1
AF-P08190-F1-model_v2_&_NOBFS_0	ALPHAFOLD	{u'b4319': 1}	89.972	{u'b4319': {u'A': [True, 89.97203592814373]}}	[u'AF-P08190-F1-model_v2_&_NOBFS_0']	167	1	1	1
AF-P08191-F1-model_v2_&_NOBFS_0	ALPHAFOLD	{u'b4320': 1}	93.1979	{u'b4320': {u'A': [True, 93.19786666666667]}}	[u'AF-P08191-F1-model_v2_&_NOBFS_0']	300	1	1	1
AF-P08192-F1-model_v2_&_NOBFS_0	ALPHAFOLD	{u'b2315': 1}	95.7687	{u'b2315': {u'A': [True, 95.76869668246445]}}	[u'AF-P08192-F1-model_v2_&_NOBFS_0']	422	1	1	1
AF-P08194-F1-model_v2_&_NOBFS_0	ALPHAFOLD	{u'b2240': 1}	84.7487	{u'b2240': {u'A': [True, 84.74865044247788]}}	[u'AF-P08194-F1-model_v2_&_NOBFS_0']	452	1	1	1
AF-P08200-F1-model_v2_&_NOBFS_0	ALPHAFOLD	{u'b1136': 1}	97.4884	{u'b1136': {u'A': [True, 97.48841346153849]}}	[u'AF-P08200-F1-model_v2_&_NOBFS_0']	416	1	1	1
AF-P08201-F1-model_v2_&_NOBFS_0	ALPHAFOLD	{u'b3365': 1}	91.0007	{u'b3365': {u'A': [True, 91.00070838252657]}}	[u'AF-P08201-F1-model_v2_&_NOBFS_0']	847	1	1	1
AF-P08202-F1-model_v2_&_NOBFS_0	ALPHAFOLD	{u'b0062': 1}	98.0883	{u'b0062': {u'A': [True, 98.08832000000001]}}	[u'AF-P08202-F1-model_v2_&_NOBFS_0']	500	1	1	1
AF-P08203-F1-model_v2_&_NOBFS_0	ALPHAFOLD	{u'b0061': 1}	96.9963	{u'b0061': {u'A': [True, 96.99627705627705]}}	[u'AF-P08203-F1-model_v2_&_NOBFS_0']	231	1	1	1
AF-P08204-F1-model_v2_&_NOBFS_0	ALPHAFOLD	{u'b0063': 1}	94.8081	{u'b0063': {u'A': [True, 94.80814487632509]}}	[u'AF-P08204-F1-model_v2_&_NOBFS_0']	566	1	1	1
AF-P08244-F1-model_v2_&_NOBFS_0	ALPHAFOLD	{u'b1281': 1}	93.1031	{u'b1281': {u'A': [True, 93.10310204081634]}}	[u'AF-P08244-F1-model_v2_&_NOBFS_0']	245	1	1	1
AF-P08245-F1-model_v2_&_NOBFS_0	ALPHAFOLD	{u'b1282': 1}	72.3935	{u'b1282': {u'A': [True, 72.3935185185185]}}	[u'AF-P08245-F1-model_v2_&_NOBFS_0']	108	1	1	1
AF-P08312-F1-model_v2_&_NOBFS_0	ALPHAFOLD	{u'b1714': 1}	94.1225	{u'b1714': {u'A': [True, 94.12250764525993]}}	[u'AF-P08312-F1-model_v2_&_NOBFS_0']	327	1	1	1
AF-P08331-F1-model_v2_&_NOBFS_0	ALPHAFOLD	{u'b4213': 1}	93.935	{u'b4213': {u'A': [True, 93.93503863987635]}}	[u'AF-P08331-F1-model_v2_&_NOBFS_0']	647	1	1	1
AF-P08337-F1-model_v2_&_NOBFS_0	ALPHAFOLD	{u'b0099': 1}	92.4689	{u'b0099': {u'A': [True, 92.46891472868218]}}	[u'AF-P08337-F1-model_v2_&_NOBFS_0']	129	1	1	1
AF-P08365-F1-model_v2_&_NOBFS_0	ALPHAFOLD	{u'b4224': 1}	91.7569	{u'b4224': {u'A': [True, 91.75686746987951]}}	[u'AF-P08365-F1-model_v2_&_NOBFS_0']	83	1	1	1
AF-P08368-F1-model_v2_&_NOBFS_0	ALPHAFOLD	{u'b4398': 1}	88.7474	{u'b4398': {u'A': [True, 88.74742358078602]}}	[u'AF-P08368-F1-model_v2_&_NOBFS_0']	229	1	1	1
AF-P08369-F1-model_v2_&_NOBFS_0	ALPHAFOLD	{u'b4400': 1}	85.9935	{u'b4400': {u'A': [True, 85.99351111111112]}}	[u'AF-P08369-F1-model_v2_&_NOBFS_0']	450	1	1	1
AF-P08370-F1-model_v2_&_NOBFS_0	ALPHAFOLD	{u'b2824': 1}	93.1234	{u'b2824': {u'A': [True, 93.12340740740741]}}	[u'AF-P08370-F1-model_v2_&_NOBFS_0']	135	1	1	1
AF-P08371-F1-model_v2_&_NOBFS_0	ALPHAFOLD	{u'b2825': 1}	94.5216	{u'b2825': {u'A': [True, 94.52160427807488]}}	[u'AF-P08371-F1-model_v2_&_NOBFS_0']	187	1	1	1
AF-P08372-F1-model_v2_&_NOBFS_0	ALPHAFOLD	{u'b2823': 1}	82.2849	{u'b2823': {u'A': [True, 82.28485981308411]}}	[u'AF-P08372-F1-model_v2_&_NOBFS_0']	107	1	1	1
AF-P08373-F1-model_v2_&_NOBFS_0	ALPHAFOLD	{u'b3972': 1}	97.821	{u'b3972': {u'A': [True, 97.82102339181284]}}	[u'AF-P08373-F1-model_v2_&_NOBFS_0']	342	1	1	1
AF-P08390-F1-model_v2_&_NOBFS_0	ALPHAFOLD	{u'b2319': 1}	95.9186	{u'b2319': {u'A': [True, 95.91857566765577]}}	[u'AF-P08390-F1-model_v2_&_NOBFS_0']	337	1	1	1
AF-P08394-F1-model_v2_&_NOBFS_0	ALPHAFOLD	{u'b2820': 1}	89.0559	{u'b2820': {u'A': [True, 89.05593220338983]}}	[u'AF-P08394-F1-model_v2_&_NOBFS_0']	1180	1	1	1
AF-P08395-F1-model_v2_&_NOBFS_0	ALPHAFOLD	{u'b1766': 1}	89.8895	{u'b1766': {u'A': [True, 89.88949838187702]}}	[u'AF-P08395-F1-model_v2_&_NOBFS_0']	618	1	1	1
AF-P08400-F1-model_v2_&_NOBFS_0	ALPHAFOLD	{u'b0400': 1}	87.5784	{u'b0400': {u'A': [True, 87.57835266821345]}}	[u'AF-P08400-F1-model_v2_&_NOBFS_0']	431	1	1	1
AF-P08401-F1-model_v2_&_NOBFS_0	ALPHAFOLD	{u'b4399': 1}	89.1182	{u'b4399': {u'A': [True, 89.11816455696203]}}	[u'AF-P08401-F1-model_v2_&_NOBFS_0']	474	1	1	1
AF-P08506-F1-model_v2_&_NOBFS_0	ALPHAFOLD	{u'b0839': 1}	92.1759	{u'b0839': {u'A': [True, 92.1759]}}	[u'AF-P08506-F1-model_v2_&_NOBFS_0']	400	1	1	1
AF-P08550-F1-model_v2_&_NOBFS_0	ALPHAFOLD	{u'b2313': 1}	88.2685	{u'b2313': {u'A': [True, 88.26845679012347]}}	[u'AF-P08550-F1-model_v2_&_NOBFS_0']	162	1	1	1
AF-P08555-F1-model_v2_&_NOBFS_0	ALPHAFOLD	{u'b2365': 1}	86.5993	{u'b2365': {u'A': [True, 86.59932584269664]}}	[u'AF-P08555-F1-model_v2_&_NOBFS_0']	445	1	1	1
AF-P08622-F1-model_v2_&_NOBFS_0	ALPHAFOLD	{u'b0015': 1}	85.6014	{u'b0015': {u'A': [True, 85.60143617021276]}}	[u'AF-P08622-F1-model_v2_&_NOBFS_0']	376	1	1	1
AF-P08660-F1-model_v2_&_NOBFS_0	ALPHAFOLD	{u'b4024': 1}	93.0057	{u'b4024': {u'A': [True, 93.00567928730513]}}	[u'AF-P08660-F1-model_v2_&_NOBFS_0']	449	1	1	1
AF-P08722-F1-model_v2_&_NOBFS_0	ALPHAFOLD	{u'b3722': 1}	86.6122	{u'b3722': {u'A': [True, 86.612224]}}	[u'AF-P08722-F1-model_v2_&_NOBFS_0']	625	1	1	1
AF-P08839-F1-model_v2_&_NOBFS_0	ALPHAFOLD	{u'b2416': 1}	89.8898	{u'b2416': {u'A': [True, 89.88979130434784]}}	[u'AF-P08839-F1-model_v2_&_NOBFS_0']	575	1	1	1
AF-P08956-F1-model_v2_&_NOBFS_0	ALPHAFOLD	{u'b4350': 1}	79.7341	{u'b4350': {u'A': [True, 79.73411111111112]}}	[u'AF-P08956-F1-model_v2_&_NOBFS_0']	1170	1	1	1
AF-P08957-F1-model_v2_&_NOBFS_0	ALPHAFOLD	{u'b4349': 1}	89.314	{u'b4349': {u'A': [True, 89.31395085066163]}}	[u'AF-P08957-F1-model_v2_&_NOBFS_0']	529	1	1	1
AF-P08997-F1-model_v2_&_NOBFS_0	ALPHAFOLD	{u'b4014': 1}	96.3416	{u'b4014': {u'A': [True, 96.34159474671671]}}	[u'AF-P08997-F1-model_v2_&_NOBFS_0']	533	1	1	1
AF-P09029-F1-model_v2_&_NOBFS_0	ALPHAFOLD	{u'b0522': 1}	97.6408	{u'b0522': {u'A': [True, 97.64076056338028]}}	[u'AF-P09029-F1-model_v2_&_NOBFS_0']	355	1	1	1
AF-P09030-F1-model_v2_&_NOBFS_0	ALPHAFOLD	{u'b1749': 1}	96.4542	{u'b1749': {u'A': [True, 96.45421641791046]}}	[u'AF-P09030-F1-model_v2_&_NOBFS_0']	268	1	1	1
AF-P09053-F1-model_v2_&_NOBFS_0	ALPHAFOLD	{u'b3572': 1}	95.9106	{u'b3572': {u'A': [True, 95.91057553956833]}}	[u'AF-P09053-F1-model_v2_&_NOBFS_0']	417	1	1	1
AF-P09099-F1-model_v2_&_NOBFS_0	ALPHAFOLD	{u'b3564': 1}	95.9906	{u'b3564': {u'A': [True, 95.99061983471074]}}	[u'AF-P09099-F1-model_v2_&_NOBFS_0']	484	1	1	1
AF-P09126-F1-model_v2_&_NOBFS_0	ALPHAFOLD	{u'b3804': 1}	96.1455	{u'b3804': {u'A': [True, 96.14552845528456]}}	[u'AF-P09126-F1-model_v2_&_NOBFS_0']	246	1	1	1
AF-P09127-F1-model_v2_&_NOBFS_0	ALPHAFOLD	{u'b3803': 1}	77.6717	{u'b3803': {u'A': [True, 77.6717048346056]}}	[u'AF-P09127-F1-model_v2_&_NOBFS_0']	393	1	1	1
AF-P09147-F1-model_v2_&_NOBFS_0	ALPHAFOLD	{u'b0759': 1}	97.4727	{u'b0759': {u'A': [True, 97.4726627218935]}}	[u'AF-P09147-F1-model_v2_&_NOBFS_0']	338	1	1	1
AF-P09148-F1-model_v2_&_NOBFS_0	ALPHAFOLD	{u'b0758': 1}	96.5577	{u'b0758': {u'A': [True, 96.55772988505746]}}	[u'AF-P09148-F1-model_v2_&_NOBFS_0']	348	1	1	1
AF-P09151-F1-model_v2_&_NOBFS_0	ALPHAFOLD	{u'b0074': 1}	91.292	{u'b0074': {u'A': [True, 91.29204588910135]}}	[u'AF-P09151-F1-model_v2_&_NOBFS_0']	523	1	1	1
AF-P09152-F1-model_v2_&_NOBFS_0	ALPHAFOLD	{u'b1224': 1}	98.2241	{u'b1224': {u'A': [True, 98.2241138732959]}}	[u'AF-P09152-F1-model_v2_&_NOBFS_0']	1247	1	1	1
AF-P09153-F1-model_v2_&_NOBFS_0	ALPHAFOLD	{u'b1156': 1}	96.4367	{u'b1156': {u'A': [True, 96.43665000000001]}}	[u'AF-P09153-F1-model_v2_&_NOBFS_0']	200	1	1	1
AF-P09154-F1-model_v2_&_NOBFS_0	ALPHAFOLD	{u'b1155': 1}	92.8526	{u'b1155': {u'A': [True, 92.85255474452555]}}	[u'AF-P09154-F1-model_v2_&_NOBFS_0']	137	1	1	1
AF-P09155-F1-model_v2_&_NOBFS_0	ALPHAFOLD	{u'b1804': 1}	95.9551	{u'b1804': {u'A': [True, 95.95512]}}	[u'AF-P09155-F1-model_v2_&_NOBFS_0']	375	1	1	1
AF-P09158-F1-model_v2_&_NOBFS_0	ALPHAFOLD	{u'b0121': 1}	94.6722	{u'b0121': {u'A': [True, 94.6721875]}}	[u'AF-P09158-F1-model_v2_&_NOBFS_0']	288	1	1	1
AF-P09162-F1-model_v2_&_NOBFS_0	ALPHAFOLD	{u'b4011': 1}	92.6851	{u'b4011': {u'A': [True, 92.68511811023623]}}	[u'AF-P09162-F1-model_v2_&_NOBFS_0']	127	1	1	1
AF-P09163-F1-model_v2_&_NOBFS_0	ALPHAFOLD	{u'b4012': 1}	94.9162	{u'b4012': {u'A': [True, 94.91619047619048]}}	[u'AF-P09163-F1-model_v2_&_NOBFS_0']	147	1	1	1
AF-P09169-F1-model_v2_&_NOBFS_0	ALPHAFOLD	{u'b0565': 1}	93.0693	{u'b0565': {u'A': [True, 93.06930599369086]}}	[u'AF-P09169-F1-model_v2_&_NOBFS_0']	317	1	1	1
AF-P09184-F1-model_v2_&_NOBFS_0	ALPHAFOLD	{u'b1960': 1}	94.7452	{u'b1960': {u'A': [True, 94.7451923076923]}}	[u'AF-P09184-F1-model_v2_&_NOBFS_0']	156	1	1	1
AF-P09323-F1-model_v2_&_NOBFS_0	ALPHAFOLD	{u'b0679': 1}	86.8886	{u'b0679': {u'A': [True, 86.88856481481481]}}	[u'AF-P09323-F1-model_v2_&_NOBFS_0']	648	1	1	1
AF-P09348-F1-model_v2_&_NOBFS_0	ALPHAFOLD	{u'b1890': 1}	92.6853	{u'b1890': {u'A': [True, 92.68528813559323]}}	[u'AF-P09348-F1-model_v2_&_NOBFS_0']	295	1	1	1
AF-P09372-F1-model_v2_&_NOBFS_0	ALPHAFOLD	{u'b2614': 1}	84.3402	{u'b2614': {u'A': [True, 84.34015228426397]}}	[u'AF-P09372-F1-model_v2_&_NOBFS_0']	197	1	1	1
AF-P09373-F1-model_v2_&_NOBFS_0	ALPHAFOLD	{u'b0903': 1}	97.708	{u'b0903': {u'A': [True, 97.70802631578948]}}	[u'AF-P09373-F1-model_v2_&_NOBFS_0']	760	1	1	1
AF-P09377-F1-model_v2_&_NOBFS_0	ALPHAFOLD	{u'b3905': 1}	91.62	{u'b3905': {u'A': [True, 91.62003597122302]}}	[u'AF-P09377-F1-model_v2_&_NOBFS_0']	278	1	1	1
AF-P09378-F1-model_v2_&_NOBFS_0	ALPHAFOLD	{u'b3906': 1}	90.7149	{u'b3906': {u'A': [True, 90.71489361702127]}}	[u'AF-P09378-F1-model_v2_&_NOBFS_0']	282	1	1	1
AF-P09391-F1-model_v2_&_NOBFS_0	ALPHAFOLD	{u'b3424': 1}	87.9768	{u'b3424': {u'A': [True, 87.97684782608695]}}	[u'AF-P09391-F1-model_v2_&_NOBFS_0']	276	1	1	1
AF-P09394-F1-model_v2_&_NOBFS_0	ALPHAFOLD	{u'b2239': 1}	93.8087	{u'b2239': {u'A': [True, 93.80865921787709]}}	[u'AF-P09394-F1-model_v2_&_NOBFS_0']	358	1	1	1
AF-P09424-F1-model_v2_&_NOBFS_0	ALPHAFOLD	{u'b3600': 1}	97.2288	{u'b3600': {u'A': [True, 97.22882198952881]}}	[u'AF-P09424-F1-model_v2_&_NOBFS_0']	382	1	1	1
AF-P09546-F1-model_v2_&_NOBFS_0	ALPHAFOLD	{u'b1014': 1}	89.1109	{u'b1014': {u'A': [True, 89.11088636363635]}}	[u'AF-P09546-F1-model_v2_&_NOBFS_0']	1320	1	1	1
AF-P09549-F1-model_v2_&_NOBFS_0	ALPHAFOLD	{u'b2314': 1}	70.5547	{u'b2314': {u'A': [True, 70.55468181818182]}}	[u'AF-P09549-F1-model_v2_&_NOBFS_0']	220	1	1	1
AF-P09551-F1-model_v2_&_NOBFS_0	ALPHAFOLD	{u'b2310': 1}	94.1933	{u'b2310': {u'A': [True, 94.19326923076923]}}	[u'AF-P09551-F1-model_v2_&_NOBFS_0']	260	1	1	1
AF-P09557-F1-model_v2_&_NOBFS_0	ALPHAFOLD	{u'b1575': 1}	74.6111	{u'b1575': {u'A': [True, 74.61112903225805]}}	[u'AF-P09557-F1-model_v2_&_NOBFS_0']	62	1	1	1
AF-P09831-F1-model_v2_&_NOBFS_0	ALPHAFOLD	{u'b3212': 1}	93.8816	{u'b3212': {u'A': [True, 93.88160161507402]}}	[u'AF-P09831-F1-model_v2_&_NOBFS_0']	1486	1	1	1
AF-P09832-F1-model_v2_&_NOBFS_0	ALPHAFOLD	{u'b3213': 1}	95.2616	{u'b3213': {u'A': [True, 95.26161016949152]}}	[u'AF-P09832-F1-model_v2_&_NOBFS_0']	472	1	1	1
AF-P09833-F1-model_v2_&_NOBFS_0	ALPHAFOLD	{u'b0765': 1}	91.8808	{u'b0765': {u'A': [True, 91.88082386363637]}}	[u'AF-P09833-F1-model_v2_&_NOBFS_0']	352	1	1	1
AF-P09835-F1-model_v2_&_NOBFS_0	ALPHAFOLD	{u'b3668': 1}	86.3655	{u'b3668': {u'A': [True, 86.36546]}}	[u'AF-P09835-F1-model_v2_&_NOBFS_0']	500	1	1	1
AF-P09836-F1-model_v2_&_NOBFS_0	ALPHAFOLD	{u'b3667': 1}	76.3785	{u'b3667': {u'A': [True, 76.37847380410022]}}	[u'AF-P09836-F1-model_v2_&_NOBFS_0']	439	1	1	1
AF-P09980-F1-model_v2_&_NOBFS_0	ALPHAFOLD	{u'b3778': 1}	88.4413	{u'b3778': {u'A': [True, 88.4412927191679]}}	[u'AF-P09980-F1-model_v2_&_NOBFS_0']	673	1	1	1
AF-P09996-F1-model_v2_&_NOBFS_0	ALPHAFOLD	{u'b3698': 1}	87.0155	{u'b3698': {u'A': [True, 87.01545454545453]}}	[u'AF-P09996-F1-model_v2_&_NOBFS_0']	132	1	1	1
AF-P0A698-F1-model_v2_&_NOBFS_0	ALPHAFOLD	{u'b4058': 1}	90.3112	{u'b4058': {u'A': [True, 90.31119148936169]}}	[u'AF-P0A698-F1-model_v2_&_NOBFS_0']	940	1	1	1
AF-P0A6A0-F1-model_v2_&_NOBFS_0	ALPHAFOLD	{u'b3835': 1}	85.8212	{u'b3835': {u'A': [True, 85.82124542124542]}}	[u'AF-P0A6A0-F1-model_v2_&_NOBFS_0']	546	1	1	1
AF-P0A6A3-F1-model_v2_&_NOBFS_0	ALPHAFOLD	{u'b2296': 1}	96.8051	{u'b2296': {u'A': [True, 96.805125]}}	[u'AF-P0A6A3-F1-model_v2_&_NOBFS_0']	400	1	1	1
AF-P0A6A6-F1-model_v2_&_NOBFS_0	ALPHAFOLD	{u'b0072': 1}	97.3506	{u'b0072': {u'A': [True, 97.35062231759657]}}	[u'AF-P0A6A6-F1-model_v2_&_NOBFS_0']	466	1	1	1
AF-P0A6A8-F1-model_v2_&_NOBFS_0	ALPHAFOLD	{u'b1094': 1}	91.1377	{u'b1094': {u'A': [True, 91.13769230769232]}}	[u'AF-P0A6A8-F1-model_v2_&_NOBFS_0']	78	1	1	1
AF-P0A6B4-F1-model_v2_&_NOBFS_0	ALPHAFOLD	{u'b4053': 1}	98.5131	{u'b4053': {u'A': [True, 98.51311977715878]}}	[u'AF-P0A6B4-F1-model_v2_&_NOBFS_0']	359	1	1	1
AF-P0A6B7-F1-model_v2_&_NOBFS_0	ALPHAFOLD	{u'b2530': 1}	95.1127	{u'b2530': {u'A': [True, 95.11267326732674]}}	[u'AF-P0A6B7-F1-model_v2_&_NOBFS_0']	404	1	1	1
AF-P0A6C1-F1-model_v2_&_NOBFS_0	ALPHAFOLD	{u'b2159': 1}	97.3178	{u'b2159': {u'A': [True, 97.31778947368421]}}	[u'AF-P0A6C1-F1-model_v2_&_NOBFS_0']	285	1	1	1
AF-P0A6C5-F1-model_v2_&_NOBFS_0	ALPHAFOLD	{u'b2818': 1}	92.1177	{u'b2818': {u'A': [True, 92.1177426636569]}}	[u'AF-P0A6C5-F1-model_v2_&_NOBFS_0']	443	1	1	1
AF-P0A6C8-F1-model_v2_&_NOBFS_0	ALPHAFOLD	{u'b3959': 1}	93.4597	{u'b3959': {u'A': [True, 93.45965116279069]}}	[u'AF-P0A6C8-F1-model_v2_&_NOBFS_0']	258	1	1	1
AF-P0A6D0-F1-model_v2_&_NOBFS_0	ALPHAFOLD	{u'b3237': 1}	87.6782	{u'b3237': {u'A': [True, 87.67820512820515]}}	[u'AF-P0A6D0-F1-model_v2_&_NOBFS_0']	156	1	1	1
AF-P0A6D3-F1-model_v2_&_NOBFS_0	ALPHAFOLD	{u'b0908': 1}	97.2711	{u'b0908': {u'A': [True, 97.27107728337236]}}	[u'AF-P0A6D3-F1-model_v2_&_NOBFS_0']	427	1	1	1
AF-P0A6D5-F1-model_v2_&_NOBFS_0	ALPHAFOLD	{u'b1692': 1}	96.7543	{u'b1692': {u'A': [True, 96.75427083333334]}}	[u'AF-P0A6D5-F1-model_v2_&_NOBFS_0']	288	1	1	1
AF-P0A6D7-F1-model_v2_&_NOBFS_0	ALPHAFOLD	{u'b3390': 1}	92.4677	{u'b3390': {u'A': [True, 92.46774566473988]}}	[u'AF-P0A6D7-F1-model_v2_&_NOBFS_0']	173	1	1	1
AF-P0A6E1-F1-model_v2_&_NOBFS_0	ALPHAFOLD	{u'b0388': 1}	92.5148	{u'b0388': {u'A': [True, 92.51477011494252]}}	[u'AF-P0A6E1-F1-model_v2_&_NOBFS_0']	174	1	1	1
AF-P0A6E4-F1-model_v2_&_NOBFS_0	ALPHAFOLD	{u'b3172': 1}	95.4724	{u'b3172': {u'A': [True, 95.47241610738254]}}	[u'AF-P0A6E4-F1-model_v2_&_NOBFS_0']	447	1	1	1
AF-P0A6E6-F1-model_v2_&_NOBFS_0	ALPHAFOLD	{u'b3731': 1}	83.8585	{u'b3731': {u'A': [True, 83.85848920863307]}}	[u'AF-P0A6E6-F1-model_v2_&_NOBFS_0']	139	1	1	1
AF-P0A6E9-F1-model_v2_&_NOBFS_0	ALPHAFOLD	{u'b1593': 1}	92.9164	{u'b1593': {u'A': [True, 92.9164069264069]}}	[u'AF-P0A6E9-F1-model_v2_&_NOBFS_0']	231	1	1	1
AF-P0A6F1-F1-model_v2_&_NOBFS_0	ALPHAFOLD	{u'b0032': 1}	98.0737	{u'b0032': {u'A': [True, 98.07369109947642]}}	[u'AF-P0A6F1-F1-model_v2_&_NOBFS_0']	382	1	1	1
AF-P0A6F3-F1-model_v2_&_NOBFS_0	ALPHAFOLD	{u'b3926': 1}	95.6595	{u'b3926': {u'A': [True, 95.65946215139442]}}	[u'AF-P0A6F3-F1-model_v2_&_NOBFS_0']	502	1	1	1
AF-P0A6F5-F1-model_v2_&_NOBFS_0	ALPHAFOLD	{u'b4143': 1}	90.6478	{u'b4143': {u'A': [True, 90.64775547445255]}}	[u'AF-P0A6F5-F1-model_v2_&_NOBFS_0']	548	1	1	1
AF-P0A6F9-F1-model_v2_&_NOBFS_0	ALPHAFOLD	{u'b4142': 1}	88.8131	{u'b4142': {u'A': [True, 88.81309278350517]}}	[u'AF-P0A6F9-F1-model_v2_&_NOBFS_0']	97	1	1	1
AF-P0A6G3-F1-model_v2_&_NOBFS_0	ALPHAFOLD	{u'b2700': 1}	97.4911	{u'b2700': {u'A': [True, 97.4910909090909]}}	[u'AF-P0A6G3-F1-model_v2_&_NOBFS_0']	165	1	1	1
AF-P0A6G5-F1-model_v2_&_NOBFS_0	ALPHAFOLD	{u'b0614': 1}	96.1243	{u'b0614': {u'A': [True, 96.1243169398907]}}	[u'AF-P0A6G5-F1-model_v2_&_NOBFS_0']	183	1	1	1
AF-P0A6G7-F1-model_v2_&_NOBFS_0	ALPHAFOLD	{u'b0437': 1}	92.749	{u'b0437': {u'A': [True, 92.74903381642511]}}	[u'AF-P0A6G7-F1-model_v2_&_NOBFS_0']	207	1	1	1
AF-P0A6H1-F1-model_v2_&_NOBFS_0	ALPHAFOLD	{u'b0438': 1}	85.3262	{u'b0438': {u'A': [True, 85.32622641509434]}}	[u'AF-P0A6H1-F1-model_v2_&_NOBFS_0']	424	1	1	1
AF-P0A6H5-F1-model_v2_&_NOBFS_0	ALPHAFOLD	{u'b3931': 1}	87.5514	{u'b3931': {u'A': [True, 87.55135440180587]}}	[u'AF-P0A6H5-F1-model_v2_&_NOBFS_0']	443	1	1	1
AF-P0A6H8-F1-model_v2_&_NOBFS_0	ALPHAFOLD	{u'b1249': 1}	90.315	{u'b1249': {u'A': [True, 90.31502057613169]}}	[u'AF-P0A6H8-F1-model_v2_&_NOBFS_0']	486	1	1	1
AF-P0A6I0-F1-model_v2_&_NOBFS_0	ALPHAFOLD	{u'b0910': 1}	93.529	{u'b0910': {u'A': [True, 93.52903083700443]}}	[u'AF-P0A6I0-F1-model_v2_&_NOBFS_0']	227	1	1	1
AF-P0A6I3-F1-model_v2_&_NOBFS_0	ALPHAFOLD	{u'b3974': 1}	90.9172	{u'b3974': {u'A': [True, 90.91715189873418]}}	[u'AF-P0A6I3-F1-model_v2_&_NOBFS_0']	316	1	1	1
AF-P0A6I6-F1-model_v2_&_NOBFS_0	ALPHAFOLD	{u'b3634': 1}	95.3303	{u'b3634': {u'A': [True, 95.33025157232703]}}	[u'AF-P0A6I6-F1-model_v2_&_NOBFS_0']	159	1	1	1
AF-P0A6I9-F1-model_v2_&_NOBFS_0	ALPHAFOLD	{u'b0103': 1}	94.0858	{u'b0103': {u'A': [True, 94.08577669902911]}}	[u'AF-P0A6I9-F1-model_v2_&_NOBFS_0']	206	1	1	1
AF-P0A6J1-F1-model_v2_&_NOBFS_0	ALPHAFOLD	{u'b2750': 1}	94.9359	{u'b2750': {u'A': [True, 94.93587064676618]}}	[u'AF-P0A6J1-F1-model_v2_&_NOBFS_0']	201	1	1	1
AF-P0A6J3-F1-model_v2_&_NOBFS_0	ALPHAFOLD	{u'b2413': 1}	89.54	{u'b2413': {u'A': [True, 89.54003952569168]}}	[u'AF-P0A6J3-F1-model_v2_&_NOBFS_0']	253	1	1	1
AF-P0A6J5-F1-model_v2_&_NOBFS_0	ALPHAFOLD	{u'b1189': 1}	93.3606	{u'b1189': {u'A': [True, 93.36055555555556]}}	[u'AF-P0A6J5-F1-model_v2_&_NOBFS_0']	432	1	1	1
AF-P0A6J8-F1-model_v2_&_NOBFS_0	ALPHAFOLD	{u'b0381': 1}	94.8364	{u'b0381': {u'A': [True, 94.83640109890109]}}	[u'AF-P0A6J8-F1-model_v2_&_NOBFS_0']	364	1	1	1
AF-P0A6K1-F1-model_v2_&_NOBFS_0	ALPHAFOLD	{u'b3809': 1}	94.9606	{u'b3809': {u'A': [True, 94.96058394160585]}}	[u'AF-P0A6K1-F1-model_v2_&_NOBFS_0']	274	1	1	1
AF-P0A6K3-F1-model_v2_&_NOBFS_0	ALPHAFOLD	{u'b3287': 1}	97.096	{u'b3287': {u'A': [True, 97.09603550295857]}}	[u'AF-P0A6K3-F1-model_v2_&_NOBFS_0']	169	1	1	1
AF-P0A6K6-F1-model_v2_&_NOBFS_0	ALPHAFOLD	{u'b4383': 1}	96.9491	{u'b4383': {u'A': [True, 96.94909090909091]}}	[u'AF-P0A6K6-F1-model_v2_&_NOBFS_0']	407	1	1	1
AF-P0A6L0-F1-model_v2_&_NOBFS_0	ALPHAFOLD	{u'b4381': 1}	96.9637	{u'b4381': {u'A': [True, 96.96366795366797]}}	[u'AF-P0A6L0-F1-model_v2_&_NOBFS_0']	259	1	1	1
AF-P0A6L2-F1-model_v2_&_NOBFS_0	ALPHAFOLD	{u'b2478': 1}	98.2851	{u'b2478': {u'A': [True, 98.28510273972603]}}	[u'AF-P0A6L2-F1-model_v2_&_NOBFS_0']	292	1	1	1
AF-P0A6L4-F1-model_v2_&_NOBFS_0	ALPHAFOLD	{u'b3225': 1}	98.4516	{u'b3225': {u'A': [True, 98.45164983164983]}}	[u'AF-P0A6L4-F1-model_v2_&_NOBFS_0']	297	1	1	1
AF-P0A6L7-F1-model_v2_&_NOBFS_0	ALPHAFOLD	{u'b1521': 1}	96.653	{u'b1521': {u'A': [True, 96.65302277432713]}}	[u'AF-P0A6L7-F1-model_v2_&_NOBFS_0']	483	1	1	1
AF-P0A6L9-F1-model_v2_&_NOBFS_0	ALPHAFOLD	{u'b2527': 1}	94.4138	{u'b2527': {u'A': [True, 94.41380116959063]}}	[u'AF-P0A6L9-F1-model_v2_&_NOBFS_0']	171	1	1	1
AF-P0A6M2-F1-model_v2_&_NOBFS_0	ALPHAFOLD	{u'b1185': 1}	78.4614	{u'b1185': {u'A': [True, 78.46136363636364]}}	[u'AF-P0A6M2-F1-model_v2_&_NOBFS_0']	176	1	1	1
AF-P0A6M4-F1-model_v2_&_NOBFS_0	ALPHAFOLD	{u'b3887': 1}	98.0139	{u'b3887': {u'A': [True, 98.01386206896552]}}	[u'AF-P0A6M4-F1-model_v2_&_NOBFS_0']	145	1	1	1
AF-P0A6M8-F1-model_v2_&_NOBFS_0	ALPHAFOLD	{u'b3340': 1}	86.849	{u'b3340': {u'A': [True, 86.84896306818182]}}	[u'AF-P0A6M8-F1-model_v2_&_NOBFS_0']	704	1	1	1
AF-P0A6N4-F1-model_v2_&_NOBFS_0	ALPHAFOLD	{u'b4147': 1}	92.8668	{u'b4147': {u'A': [True, 92.86680851063831]}}	[u'AF-P0A6N4-F1-model_v2_&_NOBFS_0']	188	1	1	1
AF-P0A6N8-F1-model_v2_&_NOBFS_0	ALPHAFOLD	{u'b2171': 1}	93.5876	{u'b2171': {u'A': [True, 93.58763157894738]}}	[u'AF-P0A6N8-F1-model_v2_&_NOBFS_0']	190	1	1	1
AF-P0A6P1-F1-model_v2_&_NOBFS_0	ALPHAFOLD	{u'b0170': 1}	94.1551	{u'b0170': {u'A': [True, 94.15508833922262]}}	[u'AF-P0A6P1-F1-model_v2_&_NOBFS_0']	283	1	1	1
AF-P0A6P5-F1-model_v2_&_NOBFS_0	ALPHAFOLD	{u'b2511': 1}	74.3313	{u'b2511': {u'A': [True, 74.33130612244898]}}	[u'AF-P0A6P5-F1-model_v2_&_NOBFS_0']	490	1	1	1
AF-P0A6P7-F1-model_v2_&_NOBFS_0	ALPHAFOLD	{u'b3865': 1}	89.947	{u'b3865': {u'A': [True, 89.94704761904761]}}	[u'AF-P0A6P7-F1-model_v2_&_NOBFS_0']	210	1	1	1
AF-P0A6P9-F1-model_v2_&_NOBFS_0	ALPHAFOLD	{u'b2779': 1}	97.4938	{u'b2779': {u'A': [True, 97.4937962962963]}}	[u'AF-P0A6P9-F1-model_v2_&_NOBFS_0']	432	1	1	1
AF-P0A6Q3-F1-model_v2_&_NOBFS_0	ALPHAFOLD	{u'b0954': 1}	97.1234	{u'b0954': {u'A': [True, 97.12343023255814]}}	[u'AF-P0A6Q3-F1-model_v2_&_NOBFS_0']	172	1	1	1
AF-P0A6Q6-F1-model_v2_&_NOBFS_0	ALPHAFOLD	{u'b0180': 1}	95.7168	{u'b0180': {u'A': [True, 95.71675496688741]}}	[u'AF-P0A6Q6-F1-model_v2_&_NOBFS_0']	151	1	1	1
AF-P0A6R0-F1-model_v2_&_NOBFS_0	ALPHAFOLD	{u'b1091': 1}	97.7945	{u'b1091': {u'A': [True, 97.79451104100947]}}	[u'AF-P0A6R0-F1-model_v2_&_NOBFS_0']	317	1	1	1
AF-P0A6R3-F1-model_v2_&_NOBFS_0	ALPHAFOLD	{u'b3261': 1}	91.0614	{u'b3261': {u'A': [True, 91.06142857142858]}}	[u'AF-P0A6R3-F1-model_v2_&_NOBFS_0']	98	1	1	1
AF-P0A6S0-F1-model_v2_&_NOBFS_0	ALPHAFOLD	{u'b1079': 1}	80.4855	{u'b1079': {u'A': [True, 80.48551724137931]}}	[u'AF-P0A6S0-F1-model_v2_&_NOBFS_0']	232	1	1	1
AF-P0A6S3-F1-model_v2_&_NOBFS_0	ALPHAFOLD	{u'b1080': 1}	83.4881	{u'b1080': {u'A': [True, 83.48813698630137]}}	[u'AF-P0A6S3-F1-model_v2_&_NOBFS_0']	365	1	1	1
AF-P0A6S5-F1-model_v2_&_NOBFS_0	ALPHAFOLD	{u'b2748': 1}	80.2686	{u'b2748': {u'A': [True, 80.26864077669904]}}	[u'AF-P0A6S5-F1-model_v2_&_NOBFS_0']	103	1	1	1
AF-P0A6S7-F1-model_v2_&_NOBFS_0	ALPHAFOLD	{u'b3608': 1}	94.6254	{u'b3608': {u'A': [True, 94.62536873156343]}}	[u'AF-P0A6S7-F1-model_v2_&_NOBFS_0']	339	1	1	1
AF-P0A6T1-F1-model_v2_&_NOBFS_0	ALPHAFOLD	{u'b4025': 1}	98.368	{u'b4025': {u'A': [True, 98.36795992714026]}}	[u'AF-P0A6T1-F1-model_v2_&_NOBFS_0']	549	1	1	1
AF-P0A6T3-F1-model_v2_&_NOBFS_0	ALPHAFOLD	{u'b0757': 1}	96.7219	{u'b0757': {u'A': [True, 96.72193717277487]}}	[u'AF-P0A6T3-F1-model_v2_&_NOBFS_0']	382	1	1	1
AF-P0A6T5-F1-model_v2_&_NOBFS_0	ALPHAFOLD	{u'b2153': 1}	96.7098	{u'b2153': {u'A': [True, 96.70977477477477]}}	[u'AF-P0A6T5-F1-model_v2_&_NOBFS_0']	222	1	1	1
AF-P0A6T9-F1-model_v2_&_NOBFS_0	ALPHAFOLD	{u'b2904': 1}	97.2129	{u'b2904': {u'A': [True, 97.21286821705426]}}	[u'AF-P0A6T9-F1-model_v2_&_NOBFS_0']	129	1	1	1
AF-P0A6U3-F1-model_v2_&_NOBFS_0	ALPHAFOLD	{u'b3741': 1}	93.8461	{u'b3741': {u'A': [True, 93.84608903020668]}}	[u'AF-P0A6U3-F1-model_v2_&_NOBFS_0']	629	1	1	1
AF-P0A6U5-F1-model_v2_&_NOBFS_0	ALPHAFOLD	{u'b3740': 1}	91.8351	{u'b3740': {u'A': [True, 91.83507246376811]}}	[u'AF-P0A6U5-F1-model_v2_&_NOBFS_0']	207	1	1	1
AF-P0A6U8-F1-model_v2_&_NOBFS_0	ALPHAFOLD	{u'b3429': 1}	97.3716	{u'b3429': {u'A': [True, 97.37155136268343]}}	[u'AF-P0A6U8-F1-model_v2_&_NOBFS_0']	477	1	1	1
AF-P0A6V1-F1-model_v2_&_NOBFS_0	ALPHAFOLD	{u'b3430': 1}	93.1723	{u'b3430': {u'A': [True, 93.17227378190255]}}	[u'AF-P0A6V1-F1-model_v2_&_NOBFS_0']	431	1	1	1
AF-P0A6V5-F1-model_v2_&_NOBFS_0	ALPHAFOLD	{u'b3425': 1}	97.0494	{u'b3425': {u'A': [True, 97.04935185185187]}}	[u'AF-P0A6V5-F1-model_v2_&_NOBFS_0']	108	1	1	1
AF-P0A6V8-F1-model_v2_&_NOBFS_0	ALPHAFOLD	{u'b2388': 1}	96.1679	{u'b2388': {u'A': [True, 96.16788161993769]}}	[u'AF-P0A6V8-F1-model_v2_&_NOBFS_0']	321	1	1	1
AF-P0A6W0-F1-model_v2_&_NOBFS_0	ALPHAFOLD	{u'b1524': 1}	96.0324	{u'b1524': {u'A': [True, 96.0324025974026]}}	[u'AF-P0A6W0-F1-model_v2_&_NOBFS_0']	308	1	1	1
AF-P0A6W3-F1-model_v2_&_NOBFS_0	ALPHAFOLD	{u'b0087': 1}	92.3515	{u'b0087': {u'A': [True, 92.35147222222221]}}	[u'AF-P0A6W3-F1-model_v2_&_NOBFS_0']	360	1	1	1
AF-P0A6W5-F1-model_v2_&_NOBFS_0	ALPHAFOLD	{u'b3181': 1}	95.463	{u'b3181': {u'A': [True, 95.46297468354432]}}	[u'AF-P0A6W5-F1-model_v2_&_NOBFS_0']	158	1	1	1
AF-P0A6W9-F1-model_v2_&_NOBFS_0	ALPHAFOLD	{u'b2688': 1}	95.5475	{u'b2688': {u'A': [True, 95.54749034749035]}}	[u'AF-P0A6W9-F1-model_v2_&_NOBFS_0']	518	1	1	1
AF-P0A6X1-F1-model_v2_&_NOBFS_0	ALPHAFOLD	{u'b1210': 1}	91.3066	{u'b1210': {u'A': [True, 91.30655502392344]}}	[u'AF-P0A6X1-F1-model_v2_&_NOBFS_0']	418	1	1	1
AF-P0A6X3-F1-model_v2_&_NOBFS_0	ALPHAFOLD	{u'b4172': 1}	80.9598	{u'b4172': {u'A': [True, 80.95980392156864]}}	[u'AF-P0A6X3-F1-model_v2_&_NOBFS_0']	102	1	1	1
AF-P0A6X7-F1-model_v2_&_NOBFS_0	ALPHAFOLD	{u'b1712': 1}	95.897	{u'b1712': {u'A': [True, 95.8969696969697]}}	[u'AF-P0A6X7-F1-model_v2_&_NOBFS_0']	99	1	1	1
AF-P0A6Y1-F1-model_v2_&_NOBFS_0	ALPHAFOLD	{u'b0912': 1}	98.0109	{u'b0912': {u'A': [True, 98.01085106382979]}}	[u'AF-P0A6Y1-F1-model_v2_&_NOBFS_0']	94	1	1	1
AF-P0A6Y5-F1-model_v2_&_NOBFS_0	ALPHAFOLD	{u'b3401': 1}	91.3353	{u'b3401': {u'A': [True, 91.33530821917807]}}	[u'AF-P0A6Y5-F1-model_v2_&_NOBFS_0']	292	1	1	1
AF-P0A6Y8-F1-model_v2_&_NOBFS_0	ALPHAFOLD	{u'b0014': 1}	92.2055	{u'b0014': {u'A': [True, 92.20553291536051]}}	[u'AF-P0A6Y8-F1-model_v2_&_NOBFS_0']	638	1	1	1
AF-P0A6Z1-F1-model_v2_&_NOBFS_0	ALPHAFOLD	{u'b2526': 1}	89.3278	{u'b2526': {u'A': [True, 89.32780844155843]}}	[u'AF-P0A6Z1-F1-model_v2_&_NOBFS_0']	616	1	1	1
AF-P0A6Z3-F1-model_v2_&_NOBFS_0	ALPHAFOLD	{u'b0473': 1}	90.1563	{u'b0473': {u'A': [True, 90.15626602564103]}}	[u'AF-P0A6Z3-F1-model_v2_&_NOBFS_0']	624	1	1	1
AF-P0A6Z6-F1-model_v2_&_NOBFS_0	ALPHAFOLD	{u'b3481': 1}	90.2066	{u'b3481': {u'A': [True, 90.20661654135338]}}	[u'AF-P0A6Z6-F1-model_v2_&_NOBFS_0']	133	1	1	1
AF-P0A700-F1-model_v2_&_NOBFS_0	ALPHAFOLD	{u'b2726': 1}	92.17	{u'b2726': {u'A': [True, 92.17000000000002]}}	[u'AF-P0A700-F1-model_v2_&_NOBFS_0']	116	1	1	1
AF-P0A703-F1-model_v2_&_NOBFS_0	ALPHAFOLD	{u'b2991': 1}	91.4219	{u'b2991': {u'A': [True, 91.42194690265487]}}	[u'AF-P0A703-F1-model_v2_&_NOBFS_0']	113	1	1	1
AF-P0A705-F1-model_v2_&_NOBFS_0	ALPHAFOLD	{u'b3168': 1}	78.5781	{u'b3168': {u'A': [True, 78.57806741573035]}}	[u'AF-P0A705-F1-model_v2_&_NOBFS_0']	890	1	1	1
AF-P0A707-F1-model_v2_&_NOBFS_0	ALPHAFOLD	{u'b1718': 1}	89.2053	{u'b1718': {u'A': [True, 89.20533333333334]}}	[u'AF-P0A707-F1-model_v2_&_NOBFS_0']	180	1	1	1
AF-P0A710-F1-model_v2_&_NOBFS_0	ALPHAFOLD	{u'b1254': 1}	90.8255	{u'b1254': {u'A': [True, 90.82553072625699]}}	[u'AF-P0A710-F1-model_v2_&_NOBFS_0']	179	1	1	1
AF-P0A712-F1-model_v2_&_NOBFS_0	ALPHAFOLD	{u'b3909': 1}	90.7783	{u'b3909': {u'A': [True, 90.77834862385322]}}	[u'AF-P0A712-F1-model_v2_&_NOBFS_0']	327	1	1	1
AF-P0A715-F1-model_v2_&_NOBFS_0	ALPHAFOLD	{u'b1215': 1}	97.5571	{u'b1215': {u'A': [True, 97.55714788732394]}}	[u'AF-P0A715-F1-model_v2_&_NOBFS_0']	284	1	1	1
AF-P0A717-F1-model_v2_&_NOBFS_0	ALPHAFOLD	{u'b1207': 1}	94.4308	{u'b1207': {u'A': [True, 94.43076190476191]}}	[u'AF-P0A717-F1-model_v2_&_NOBFS_0']	315	1	1	1
AF-P0A720-F1-model_v2_&_NOBFS_0	ALPHAFOLD	{u'b1098': 1}	97.2813	{u'b1098': {u'A': [True, 97.28126760563381]}}	[u'AF-P0A720-F1-model_v2_&_NOBFS_0']	213	1	1	1
AF-P0A722-F1-model_v2_&_NOBFS_0	ALPHAFOLD	{u'b0181': 1}	97.8269	{u'b0181': {u'A': [True, 97.82690839694656]}}	[u'AF-P0A722-F1-model_v2_&_NOBFS_0']	262	1	1	1
AF-P0A725-F1-model_v2_&_NOBFS_0	ALPHAFOLD	{u'b0096': 1}	95.3445	{u'b0096': {u'A': [True, 95.34449180327869]}}	[u'AF-P0A725-F1-model_v2_&_NOBFS_0']	305	1	1	1
AF-P0A729-F1-model_v2_&_NOBFS_0	ALPHAFOLD	{u'b1087': 1}	96.0829	{u'b1087': {u'A': [True, 96.08288659793816]}}	[u'AF-P0A729-F1-model_v2_&_NOBFS_0']	194	1	1	1
AF-P0A731-F1-model_v2_&_NOBFS_0	ALPHAFOLD	{u'b0963': 1}	97.205	{u'b0963': {u'A': [True, 97.205]}}	[u'AF-P0A731-F1-model_v2_&_NOBFS_0']	152	1	1	1
AF-P0A734-F1-model_v2_&_NOBFS_0	ALPHAFOLD	{u'b1174': 1}	80.611	{u'b1174': {u'A': [True, 80.61102272727273]}}	[u'AF-P0A734-F1-model_v2_&_NOBFS_0']	88	1	1	1
AF-P0A738-F1-model_v2_&_NOBFS_0	ALPHAFOLD	{u'b0783': 1}	93.6453	{u'b0783': {u'A': [True, 93.64527950310558]}}	[u'AF-P0A738-F1-model_v2_&_NOBFS_0']	161	1	1	1
AF-P0A742-F1-model_v2_&_NOBFS_0	ALPHAFOLD	{u'b3291': 1}	85.1107	{u'b3291': {u'A': [True, 85.11073529411765]}}	[u'AF-P0A742-F1-model_v2_&_NOBFS_0']	136	1	1	1
AF-P0A744-F1-model_v2_&_NOBFS_0	ALPHAFOLD	{u'b4219': 1}	94.9821	{u'b4219': {u'A': [True, 94.98207547169811]}}	[u'AF-P0A744-F1-model_v2_&_NOBFS_0']	212	1	1	1
AF-P0A746-F1-model_v2_&_NOBFS_0	ALPHAFOLD	{u'b1778': 1}	94.6085	{u'b1778': {u'A': [True, 94.60846715328468]}}	[u'AF-P0A746-F1-model_v2_&_NOBFS_0']	137	1	1	1
AF-P0A749-F1-model_v2_&_NOBFS_0	ALPHAFOLD	{u'b3189': 1}	97.193	{u'b3189': {u'A': [True, 97.19303102625298]}}	[u'AF-P0A749-F1-model_v2_&_NOBFS_0']	419	1	1	1
AF-P0A752-F1-model_v2_&_NOBFS_0	ALPHAFOLD	{u'b0639': 1}	94.1047	{u'b0639': {u'A': [True, 94.10469483568075]}}	[u'AF-P0A752-F1-model_v2_&_NOBFS_0']	213	1	1	1
AF-P0A754-F1-model_v2_&_NOBFS_0	ALPHAFOLD	{u'b0046': 1}	95.9761	{u'b0046': {u'A': [True, 95.97613636363636]}}	[u'AF-P0A754-F1-model_v2_&_NOBFS_0']	176	1	1	1
AF-P0A756-F1-model_v2_&_NOBFS_0	ALPHAFOLD	{u'b3351': 1}	95.2329	{u'b3351': {u'A': [True, 95.2328804347826]}}	[u'AF-P0A756-F1-model_v2_&_NOBFS_0']	184	1	1	1
AF-P0A759-F1-model_v2_&_NOBFS_0	ALPHAFOLD	{u'b0678': 1}	97.5111	{u'b0678': {u'A': [True, 97.51112781954888]}}	[u'AF-P0A759-F1-model_v2_&_NOBFS_0']	266	1	1	1
AF-P0A761-F1-model_v2_&_NOBFS_0	ALPHAFOLD	{u'b3223': 1}	98.3031	{u'b3223': {u'A': [True, 98.30314410480351]}}	[u'AF-P0A761-F1-model_v2_&_NOBFS_0']	229	1	1	1
AF-P0A763-F1-model_v2_&_NOBFS_0	ALPHAFOLD	{u'b2518': 1}	97.1761	{u'b2518': {u'A': [True, 97.17608391608391]}}	[u'AF-P0A763-F1-model_v2_&_NOBFS_0']	143	1	1	1
AF-P0A766-F1-model_v2_&_NOBFS_0	ALPHAFOLD	{u'b1627': 1}	82.2846	{u'b1627': {u'A': [True, 82.28455958549223]}}	[u'AF-P0A766-F1-model_v2_&_NOBFS_0']	193	1	1	1
AF-P0A769-F1-model_v2_&_NOBFS_0	ALPHAFOLD	{u'b2392': 1}	80.7472	{u'b2392': {u'A': [True, 80.74723300970874]}}	[u'AF-P0A769-F1-model_v2_&_NOBFS_0']	412	1	1	1
AF-P0A772-F1-model_v2_&_NOBFS_0	ALPHAFOLD	{u'b2674': 1}	93.9968	{u'b2674': {u'A': [True, 93.99676470588234]}}	[u'AF-P0A772-F1-model_v2_&_NOBFS_0']	136	1	1	1
AF-P0A776-F1-model_v2_&_NOBFS_0	ALPHAFOLD	{u'b2830': 1}	91.613	{u'b2830': {u'A': [True, 91.61301136363636]}}	[u'AF-P0A776-F1-model_v2_&_NOBFS_0']	176	1	1	1
AF-P0A780-F1-model_v2_&_NOBFS_0	ALPHAFOLD	{u'b0416': 1}	94.5933	{u'b0416': {u'A': [True, 94.59330935251799]}}	[u'AF-P0A780-F1-model_v2_&_NOBFS_0']	139	1	1	1
AF-P0A784-F1-model_v2_&_NOBFS_0	ALPHAFOLD	{u'b4162': 1}	97.014	{u'b4162': {u'A': [True, 97.01403314917127]}}	[u'AF-P0A784-F1-model_v2_&_NOBFS_0']	181	1	1	1
AF-P0A786-F1-model_v2_&_NOBFS_0	ALPHAFOLD	{u'b4245': 1}	94.3706	{u'b4245': {u'A': [True, 94.37061093247588]}}	[u'AF-P0A786-F1-model_v2_&_NOBFS_0']	311	1	1	1
AF-P0A790-F1-model_v2_&_NOBFS_0	ALPHAFOLD	{u'b0131': 1}	97.1967	{u'b0131': {u'A': [True, 97.19674603174603]}}	[u'AF-P0A790-F1-model_v2_&_NOBFS_0']	126	1	1	1
AF-P0A794-F1-model_v2_&_NOBFS_0	ALPHAFOLD	{u'b2564': 1}	97.0373	{u'b2564': {u'A': [True, 97.03728395061728]}}	[u'AF-P0A794-F1-model_v2_&_NOBFS_0']	243	1	1	1
AF-P0A796-F1-model_v2_&_NOBFS_0	ALPHAFOLD	{u'b3916': 1}	95.8826	{u'b3916': {u'A': [True, 95.88262499999999]}}	[u'AF-P0A796-F1-model_v2_&_NOBFS_0']	320	1	1	1
AF-P0A799-F1-model_v2_&_NOBFS_0	ALPHAFOLD	{u'b2926': 1}	96.445	{u'b2926': {u'A': [True, 96.44498708010336]}}	[u'AF-P0A799-F1-model_v2_&_NOBFS_0']	387	1	1	1
AF-P0A7A2-F1-model_v2_&_NOBFS_0	ALPHAFOLD	{u'b4395': 1}	95.57	{u'b4395': {u'A': [True, 95.5699534883721]}}	[u'AF-P0A7A2-F1-model_v2_&_NOBFS_0']	215	1	1	1
AF-P0A7A5-F1-model_v2_&_NOBFS_0	ALPHAFOLD	{u'b2743': 1}	97.0105	{u'b2743': {u'A': [True, 97.01052884615386]}}	[u'AF-P0A7A5-F1-model_v2_&_NOBFS_0']	208	1	1	1
AF-P0A7A7-F1-model_v2_&_NOBFS_0	ALPHAFOLD	{u'b4041': 1}	90.0099	{u'b4041': {u'A': [True, 90.00991325898389]}}	[u'AF-P0A7A7-F1-model_v2_&_NOBFS_0']	807	1	1	1
AF-P0A7A9-F1-model_v2_&_NOBFS_0	ALPHAFOLD	{u'b4226': 1}	96.6124	{u'b4226': {u'A': [True, 96.61238636363636]}}	[u'AF-P0A7A9-F1-model_v2_&_NOBFS_0']	176	1	1	1
AF-P0A7B1-F1-model_v2_&_NOBFS_0	ALPHAFOLD	{u'b2501': 1}	90.9738	{u'b2501': {u'A': [True, 90.97376453488371]}}	[u'AF-P0A7B1-F1-model_v2_&_NOBFS_0']	688	1	1	1
AF-P0A7B3-F1-model_v2_&_NOBFS_0	ALPHAFOLD	{u'b2615': 1}	92.6969	{u'b2615': {u'A': [True, 92.69691780821918]}}	[u'AF-P0A7B3-F1-model_v2_&_NOBFS_0']	292	1	1	1
AF-P0A7B5-F1-model_v2_&_NOBFS_0	ALPHAFOLD	{u'b0242': 1}	93.037	{u'b0242': {u'A': [True, 93.03700272479564]}}	[u'AF-P0A7B5-F1-model_v2_&_NOBFS_0']	367	1	1	1
AF-P0A7B8-F1-model_v2_&_NOBFS_0	ALPHAFOLD	{u'b3932': 1}	96.2208	{u'b3932': {u'A': [True, 96.22079545454545]}}	[u'AF-P0A7B8-F1-model_v2_&_NOBFS_0']	176	1	1	1
AF-P0A7C2-F1-model_v2_&_NOBFS_0	ALPHAFOLD	{u'b4043': 1}	92.3175	{u'b4043': {u'A': [True, 92.31752475247525]}}	[u'AF-P0A7C2-F1-model_v2_&_NOBFS_0']	202	1	1	1
AF-P0A7C6-F1-model_v2_&_NOBFS_0	ALPHAFOLD	{u'b4021': 1}	98.4056	{u'b4021': {u'A': [True, 98.40558951965065]}}	[u'AF-P0A7C6-F1-model_v2_&_NOBFS_0']	229	1	1	1
AF-P0A7C8-F1-model_v2_&_NOBFS_0	ALPHAFOLD	{u'b4030': 1}	88.1302	{u'b4030': {u'A': [True, 88.13022058823529]}}	[u'AF-P0A7C8-F1-model_v2_&_NOBFS_0']	136	1	1	1
AF-P0A7D1-F1-model_v2_&_NOBFS_0	ALPHAFOLD	{u'b1204': 1}	97.4981	{u'b1204': {u'A': [True, 97.49809278350517]}}	[u'AF-P0A7D1-F1-model_v2_&_NOBFS_0']	194	1	1	1
AF-P0A7D4-F1-model_v2_&_NOBFS_0	ALPHAFOLD	{u'b4177': 1}	95.1421	{u'b4177': {u'A': [True, 95.14210648148148]}}	[u'AF-P0A7D4-F1-model_v2_&_NOBFS_0']	432	1	1	1
AF-P0A7D7-F1-model_v2_&_NOBFS_0	ALPHAFOLD	{u'b2476': 1}	96.4253	{u'b2476': {u'A': [True, 96.42527426160338]}}	[u'AF-P0A7D7-F1-model_v2_&_NOBFS_0']	237	1	1	1
AF-P0A7E1-F1-model_v2_&_NOBFS_0	ALPHAFOLD	{u'b0945': 1}	96.2881	{u'b0945': {u'A': [True, 96.288125]}}	[u'AF-P0A7E1-F1-model_v2_&_NOBFS_0']	336	1	1	1
AF-P0A7E3-F1-model_v2_&_NOBFS_0	ALPHAFOLD	{u'b3642': 1}	94.3777	{u'b3642': {u'A': [True, 94.37765258215961]}}	[u'AF-P0A7E3-F1-model_v2_&_NOBFS_0']	213	1	1	1
AF-P0A7E5-F1-model_v2_&_NOBFS_0	ALPHAFOLD	{u'b2780': 1}	94.158	{u'b2780': {u'A': [True, 94.158]}}	[u'AF-P0A7E5-F1-model_v2_&_NOBFS_0']	545	1	1	1
AF-P0A7E9-F1-model_v2_&_NOBFS_0	ALPHAFOLD	{u'b0171': 1}	95.3235	{u'b0171': {u'A': [True, 95.32348547717842]}}	[u'AF-P0A7E9-F1-model_v2_&_NOBFS_0']	241	1	1	1
AF-P0A7F3-F1-model_v2_&_NOBFS_0	ALPHAFOLD	{u'b4244': 1}	90.3918	{u'b4244': {u'A': [True, 90.39176470588234]}}	[u'AF-P0A7F3-F1-model_v2_&_NOBFS_0']	153	1	1	1
AF-P0A7F6-F1-model_v2_&_NOBFS_0	ALPHAFOLD	{u'b0120': 1}	87.9108	{u'b0120': {u'A': [True, 87.91083333333333]}}	[u'AF-P0A7F6-F1-model_v2_&_NOBFS_0']	264	1	1	1
AF-P0A7F9-F1-model_v2_&_NOBFS_0	ALPHAFOLD	{u'b0405': 1}	95.3367	{u'b0405': {u'A': [True, 95.33671348314607]}}	[u'AF-P0A7F9-F1-model_v2_&_NOBFS_0']	356	1	1	1
AF-P0A7G2-F1-model_v2_&_NOBFS_0	ALPHAFOLD	{u'b3167': 1}	73.8641	{u'b3167': {u'A': [True, 73.86406015037595]}}	[u'AF-P0A7G2-F1-model_v2_&_NOBFS_0']	133	1	1	1
AF-P0A7G6-F1-model_v2_&_NOBFS_0	ALPHAFOLD	{u'b2699': 1}	91.0353	{u'b2699': {u'A': [True, 91.03526912181302]}}	[u'AF-P0A7G6-F1-model_v2_&_NOBFS_0']	353	1	1	1
AF-P0A7H0-F1-model_v2_&_NOBFS_0	ALPHAFOLD	{u'b3700': 1}	95.1681	{u'b3700': {u'A': [True, 95.16812324929971]}}	[u'AF-P0A7H0-F1-model_v2_&_NOBFS_0']	357	1	1	1
AF-P0A7H3-F1-model_v2_&_NOBFS_0	ALPHAFOLD	{u'b2565': 1}	93.2826	{u'b2565': {u'A': [True, 93.28264462809916]}}	[u'AF-P0A7H3-F1-model_v2_&_NOBFS_0']	242	1	1	1
AF-P0A7H6-F1-model_v2_&_NOBFS_0	ALPHAFOLD	{u'b0472': 1}	95.873	{u'b0472': {u'A': [True, 95.87303482587065]}}	[u'AF-P0A7H6-F1-model_v2_&_NOBFS_0']	201	1	1	1
AF-P0A7I0-F1-model_v2_&_NOBFS_0	ALPHAFOLD	{u'b1211': 1}	88.9	{u'b1211': {u'A': [True, 88.89997222222223]}}	[u'AF-P0A7I0-F1-model_v2_&_NOBFS_0']	360	1	1	1
AF-P0A7I4-F1-model_v2_&_NOBFS_0	ALPHAFOLD	{u'b4375': 1}	88.0285	{u'b4375': {u'A': [True, 88.02846880907371]}}	[u'AF-P0A7I4-F1-model_v2_&_NOBFS_0']	529	1	1	1
AF-P0A7I7-F1-model_v2_&_NOBFS_0	ALPHAFOLD	{u'b1277': 1}	94.6529	{u'b1277': {u'A': [True, 94.65285714285714]}}	[u'AF-P0A7I7-F1-model_v2_&_NOBFS_0']	196	1	1	1
AF-P0A7J0-F1-model_v2_&_NOBFS_0	ALPHAFOLD	{u'b3041': 1}	96.3516	{u'b3041': {u'A': [True, 96.3516129032258]}}	[u'AF-P0A7J0-F1-model_v2_&_NOBFS_0']	217	1	1	1
AF-P0A7J3-F1-model_v2_&_NOBFS_0	ALPHAFOLD	{u'b3985': 1}	65.7255	{u'b3985': {u'A': [True, 65.72551515151514]}}	[u'AF-P0A7J3-F1-model_v2_&_NOBFS_0']	165	1	1	1
AF-P0A7J7-F1-model_v2_&_NOBFS_0	ALPHAFOLD	{u'b3983': 1}	81.0578	{u'b3983': {u'A': [True, 81.05781690140844]}}	[u'AF-P0A7J7-F1-model_v2_&_NOBFS_0']	142	1	1	1
AF-P0A7K2-F1-model_v2_&_NOBFS_0	ALPHAFOLD	{u'b3986': 1}	78.2068	{u'b3986': {u'A': [True, 78.20677685950412]}}	[u'AF-P0A7K2-F1-model_v2_&_NOBFS_0']	121	1	1	1
AF-P0A7K6-F1-model_v2_&_NOBFS_0	ALPHAFOLD	{u'b2606': 1}	94.1449	{u'b2606': {u'A': [True, 94.14486956521738]}}	[u'AF-P0A7K6-F1-model_v2_&_NOBFS_0']	115	1	1	1
AF-P0A7L0-F1-model_v2_&_NOBFS_0	ALPHAFOLD	{u'b3984': 1}	83.161	{u'b3984': {u'A': [True, 83.1609829059829]}}	[u'AF-P0A7L0-F1-model_v2_&_NOBFS_0']	234	1	1	1
AF-P0A7L3-F1-model_v2_&_NOBFS_0	ALPHAFOLD	{u'b1716': 1}	95.0687	{u'b1716': {u'A': [True, 95.06872881355933]}}	[u'AF-P0A7L3-F1-model_v2_&_NOBFS_0']	118	1	1	1
AF-P0A7L8-F1-model_v2_&_NOBFS_0	ALPHAFOLD	{u'b3185': 1}	91.7576	{u'b3185': {u'A': [True, 91.75764705882354]}}	[u'AF-P0A7L8-F1-model_v2_&_NOBFS_0']	85	1	1	1
AF-P0A7M2-F1-model_v2_&_NOBFS_0	ALPHAFOLD	{u'b3637': 1}	94.7547	{u'b3637': {u'A': [True, 94.75474358974358]}}	[u'AF-P0A7M2-F1-model_v2_&_NOBFS_0']	78	1	1	1
AF-P0A7M6-F1-model_v2_&_NOBFS_0	ALPHAFOLD	{u'b3312': 1}	87.2676	{u'b3312': {u'A': [True, 87.26761904761908]}}	[u'AF-P0A7M6-F1-model_v2_&_NOBFS_0']	63	1	1	1
AF-P0A7M9-F1-model_v2_&_NOBFS_0	ALPHAFOLD	{u'b3936': 1}	74.7253	{u'b3936': {u'A': [True, 74.72528571428572]}}	[u'AF-P0A7M9-F1-model_v2_&_NOBFS_0']	70	1	1	1
AF-P0A7N1-F1-model_v2_&_NOBFS_0	ALPHAFOLD	{u'b0296': 1}	80.9151	{u'b0296': {u'A': [True, 80.91505747126438]}}	[u'AF-P0A7N1-F1-model_v2_&_NOBFS_0']	87	1	1	1
AF-P0A7N4-F1-model_v2_&_NOBFS_0	ALPHAFOLD	{u'b1089': 1}	89.9458	{u'b1089': {u'A': [True, 89.94578947368419]}}	[u'AF-P0A7N4-F1-model_v2_&_NOBFS_0']	57	1	1	1
AF-P0A7N9-F1-model_v2_&_NOBFS_0	ALPHAFOLD	{u'b3636': 1}	84.9189	{u'b3636': {u'A': [True, 84.9189090909091]}}	[u'AF-P0A7N9-F1-model_v2_&_NOBFS_0']	55	1	1	1
AF-P0A7P5-F1-model_v2_&_NOBFS_0	ALPHAFOLD	{u'b3703': 1}	95.2341	{u'b3703': {u'A': [True, 95.2341304347826]}}	[u'AF-P0A7P5-F1-model_v2_&_NOBFS_0']	46	1	1	1
AF-P0A7Q1-F1-model_v2_&_NOBFS_0	ALPHAFOLD	{u'b1717': 1}	93.6078	{u'b1717': {u'A': [True, 93.60784615384614]}}	[u'AF-P0A7Q1-F1-model_v2_&_NOBFS_0']	65	1	1	1
AF-P0A7Q6-F1-model_v2_&_NOBFS_0	ALPHAFOLD	{u'b3299': 1}	95.4818	{u'b3299': {u'A': [True, 95.48184210526315]}}	[u'AF-P0A7Q6-F1-model_v2_&_NOBFS_0']	38	1	1	1
AF-P0A7R1-F1-model_v2_&_NOBFS_0	ALPHAFOLD	{u'b4203': 1}	91.0848	{u'b4203': {u'A': [True, 91.08476510067115]}}	[u'AF-P0A7R1-F1-model_v2_&_NOBFS_0']	149	1	1	1
AF-P0A7R5-F1-model_v2_&_NOBFS_0	ALPHAFOLD	{u'b3321': 1}	88.8307	{u'b3321': {u'A': [True, 88.8306796116505]}}	[u'AF-P0A7R5-F1-model_v2_&_NOBFS_0']	103	1	1	1
AF-P0A7R9-F1-model_v2_&_NOBFS_0	ALPHAFOLD	{u'b3297': 1}	92.2764	{u'b3297': {u'A': [True, 92.27643410852713]}}	[u'AF-P0A7R9-F1-model_v2_&_NOBFS_0']	129	1	1	1
AF-P0A7S3-F1-model_v2_&_NOBFS_0	ALPHAFOLD	{u'b3342': 1}	96.3103	{u'b3342': {u'A': [True, 96.31032258064516]}}	[u'AF-P0A7S3-F1-model_v2_&_NOBFS_0']	124	1	1	1
AF-P0A7S9-F1-model_v2_&_NOBFS_0	ALPHAFOLD	{u'b3298': 1}	91.7674	{u'b3298': {u'A': [True, 91.76737288135593]}}	[u'AF-P0A7S9-F1-model_v2_&_NOBFS_0']	118	1	1	1
AF-P0A7T3-F1-model_v2_&_NOBFS_0	ALPHAFOLD	{u'b2609': 1}	96.4126	{u'b2609': {u'A': [True, 96.41256097560975]}}	[u'AF-P0A7T3-F1-model_v2_&_NOBFS_0']	82	1	1	1
AF-P0A7T7-F1-model_v2_&_NOBFS_0	ALPHAFOLD	{u'b4202': 1}	90.7136	{u'b4202': {u'A': [True, 90.7136]}}	[u'AF-P0A7T7-F1-model_v2_&_NOBFS_0']	75	1	1	1
AF-P0A7U3-F1-model_v2_&_NOBFS_0	ALPHAFOLD	{u'b3316': 1}	88.6302	{u'b3316': {u'A': [True, 88.63021739130436]}}	[u'AF-P0A7U3-F1-model_v2_&_NOBFS_0']	92	1	1	1
AF-P0A7U7-F1-model_v2_&_NOBFS_0	ALPHAFOLD	{u'b0023': 1}	94.6447	{u'b0023': {u'A': [True, 94.64471264367819]}}	[u'AF-P0A7U7-F1-model_v2_&_NOBFS_0']	87	1	1	1
AF-P0A7V0-F1-model_v2_&_NOBFS_0	ALPHAFOLD	{u'b0169': 1}	93.5175	{u'b0169': {u'A': [True, 93.51751037344398]}}	[u'AF-P0A7V0-F1-model_v2_&_NOBFS_0']	241	1	1	1
AF-P0A7V3-F1-model_v2_&_NOBFS_0	ALPHAFOLD	{u'b3314': 1}	89.3977	{u'b3314': {u'A': [True, 89.39772532188842]}}	[u'AF-P0A7V3-F1-model_v2_&_NOBFS_0']	233	1	1	1
AF-P0A7V8-F1-model_v2_&_NOBFS_0	ALPHAFOLD	{u'b3296': 1}	93.2413	{u'b3296': {u'A': [True, 93.24126213592233]}}	[u'AF-P0A7V8-F1-model_v2_&_NOBFS_0']	206	1	1	1
AF-P0A7W1-F1-model_v2_&_NOBFS_0	ALPHAFOLD	{u'b3303': 1}	91.9813	{u'b3303': {u'A': [True, 91.98125748502993]}}	[u'AF-P0A7W1-F1-model_v2_&_NOBFS_0']	167	1	1	1
AF-P0A7W7-F1-model_v2_&_NOBFS_0	ALPHAFOLD	{u'b3306': 1}	94.8685	{u'b3306': {u'A': [True, 94.86846153846152]}}	[u'AF-P0A7W7-F1-model_v2_&_NOBFS_0']	130	1	1	1
AF-P0A7X3-F1-model_v2_&_NOBFS_0	ALPHAFOLD	{u'b3230': 1}	92.9988	{u'b3230': {u'A': [True, 92.99876923076923]}}	[u'AF-P0A7X3-F1-model_v2_&_NOBFS_0']	130	1	1	1
AF-P0A7X6-F1-model_v2_&_NOBFS_0	ALPHAFOLD	{u'b2608': 1}	90.1099	{u'b2608': {u'A': [True, 90.10994505494504]}}	[u'AF-P0A7X6-F1-model_v2_&_NOBFS_0']	182	1	1	1
AF-P0A7Y0-F1-model_v2_&_NOBFS_0	ALPHAFOLD	{u'b2567': 1}	94.4333	{u'b2567': {u'A': [True, 94.43331858407078]}}	[u'AF-P0A7Y0-F1-model_v2_&_NOBFS_0']	226	1	1	1
AF-P0A7Y4-F1-model_v2_&_NOBFS_0	ALPHAFOLD	{u'b0214': 1}	95.5695	{u'b0214': {u'A': [True, 95.56948387096774]}}	[u'AF-P0A7Y4-F1-model_v2_&_NOBFS_0']	155	1	1	1
AF-P0A7Y8-F1-model_v2_&_NOBFS_0	ALPHAFOLD	{u'b3704': 1}	78.9494	{u'b3704': {u'A': [True, 78.9494117647059]}}	[u'AF-P0A7Y8-F1-model_v2_&_NOBFS_0']	119	1	1	1
AF-P0A7Z0-F1-model_v2_&_NOBFS_0	ALPHAFOLD	{u'b2914': 1}	97.7531	{u'b2914': {u'A': [True, 97.75310502283105]}}	[u'AF-P0A7Z0-F1-model_v2_&_NOBFS_0']	219	1	1	1
AF-P0A7Z4-F1-model_v2_&_NOBFS_0	ALPHAFOLD	{u'b3295': 1}	84.7671	{u'b3295': {u'A': [True, 84.76711246200608]}}	[u'AF-P0A7Z4-F1-model_v2_&_NOBFS_0']	329	1	1	1
AF-P0A800-F1-model_v2_&_NOBFS_0	ALPHAFOLD	{u'b3649': 1}	91.5046	{u'b3649': {u'A': [True, 91.50461538461536]}}	[u'AF-P0A800-F1-model_v2_&_NOBFS_0']	91	1	1	1
AF-P0A805-F1-model_v2_&_NOBFS_0	ALPHAFOLD	{u'b0172': 1}	89.8238	{u'b0172': {u'A': [True, 89.82383783783784]}}	[u'AF-P0A805-F1-model_v2_&_NOBFS_0']	185	1	1	1
AF-P0A809-F1-model_v2_&_NOBFS_0	ALPHAFOLD	{u'b1861': 1}	90.3897	{u'b1861': {u'A': [True, 90.38970443349754]}}	[u'AF-P0A809-F1-model_v2_&_NOBFS_0']	203	1	1	1
AF-P0A812-F1-model_v2_&_NOBFS_0	ALPHAFOLD	{u'b1860': 1}	91.4219	{u'b1860': {u'A': [True, 91.42187500000001]}}	[u'AF-P0A812-F1-model_v2_&_NOBFS_0']	336	1	1	1
AF-P0A814-F1-model_v2_&_NOBFS_0	ALPHAFOLD	{u'b1863': 1}	90.1104	{u'b1863': {u'A': [True, 90.11040462427746]}}	[u'AF-P0A814-F1-model_v2_&_NOBFS_0']	173	1	1	1
AF-P0A817-F1-model_v2_&_NOBFS_0	ALPHAFOLD	{u'b2942': 1}	96.1291	{u'b2942': {u'A': [True, 96.12908854166666]}}	[u'AF-P0A817-F1-model_v2_&_NOBFS_0']	384	1	1	1
AF-P0A821-F1-model_v2_&_NOBFS_0	ALPHAFOLD	{u'b3591': 1}	94.4562	{u'b3591': {u'A': [True, 94.45619870410367]}}	[u'AF-P0A821-F1-model_v2_&_NOBFS_0']	463	1	1	1
AF-P0A823-F1-model_v2_&_NOBFS_0	ALPHAFOLD	{u'b0146': 1}	97.0483	{u'b0146': {u'A': [True, 97.04833333333332]}}	[u'AF-P0A823-F1-model_v2_&_NOBFS_0']	234	1	1	1
AF-P0A825-F1-model_v2_&_NOBFS_0	ALPHAFOLD	{u'b2551': 1}	97.8581	{u'b2551': {u'A': [True, 97.85812949640287]}}	[u'AF-P0A825-F1-model_v2_&_NOBFS_0']	417	1	1	1
AF-P0A828-F1-model_v2_&_NOBFS_0	ALPHAFOLD	{u'b3284': 1}	84.4453	{u'b3284': {u'A': [True, 84.44528662420382]}}	[u'AF-P0A828-F1-model_v2_&_NOBFS_0']	157	1	1	1
AF-P0A830-F1-model_v2_&_NOBFS_0	ALPHAFOLD	{u'b3528': 1}	86.1996	{u'b3528': {u'A': [True, 86.19960280373832]}}	[u'AF-P0A830-F1-model_v2_&_NOBFS_0']	428	1	1	1
AF-P0A832-F1-model_v2_&_NOBFS_0	ALPHAFOLD	{u'b2620': 1}	89.2101	{u'b2620': {u'A': [True, 89.21012499999999]}}	[u'AF-P0A832-F1-model_v2_&_NOBFS_0']	160	1	1	1
AF-P0A836-F1-model_v2_&_NOBFS_0	ALPHAFOLD	{u'b0728': 1}	94.9301	{u'b0728': {u'A': [True, 94.93007731958764]}}	[u'AF-P0A836-F1-model_v2_&_NOBFS_0']	388	1	1	1
AF-P0A840-F1-model_v2_&_NOBFS_0	ALPHAFOLD	{u'b2744': 1}	96.9439	{u'b2744': {u'A': [True, 96.94387351778657]}}	[u'AF-P0A840-F1-model_v2_&_NOBFS_0']	253	1	1	1
AF-P0A843-F1-model_v2_&_NOBFS_0	ALPHAFOLD	{u'b0627': 1}	83.7313	{u'b0627': {u'A': [True, 83.73134328358208]}}	[u'AF-P0A843-F1-model_v2_&_NOBFS_0']	67	1	1	1
AF-P0A847-F1-model_v2_&_NOBFS_0	ALPHAFOLD	{u'b0406': 1}	96.3101	{u'b0406': {u'A': [True, 96.31010666666667]}}	[u'AF-P0A847-F1-model_v2_&_NOBFS_0']	375	1	1	1
AF-P0A850-F1-model_v2_&_NOBFS_0	ALPHAFOLD	{u'b0436': 1}	88.6339	{u'b0436': {u'A': [True, 88.63388888888888]}}	[u'AF-P0A850-F1-model_v2_&_NOBFS_0']	432	1	1	1
AF-P0A853-F1-model_v2_&_NOBFS_0	ALPHAFOLD	{u'b3708': 1}	96.7683	{u'b3708': {u'A': [True, 96.76825902335456]}}	[u'AF-P0A853-F1-model_v2_&_NOBFS_0']	471	1	1	1
AF-P0A855-F1-model_v2_&_NOBFS_0	ALPHAFOLD	{u'b0740': 1}	94.2835	{u'b0740': {u'A': [True, 94.28353488372093]}}	[u'AF-P0A855-F1-model_v2_&_NOBFS_0']	430	1	1	1
AF-P0A858-F1-model_v2_&_NOBFS_0	ALPHAFOLD	{u'b3919': 1}	97.1651	{u'b3919': {u'A': [True, 97.16509803921568]}}	[u'AF-P0A858-F1-model_v2_&_NOBFS_0']	255	1	1	1
AF-P0A862-F1-model_v2_&_NOBFS_0	ALPHAFOLD	{u'b1324': 1}	94.7177	{u'b1324': {u'A': [True, 94.71767857142856]}}	[u'AF-P0A862-F1-model_v2_&_NOBFS_0']	168	1	1	1
AF-P0A867-F1-model_v2_&_NOBFS_0	ALPHAFOLD	{u'b2464': 1}	97.6016	{u'b2464': {u'A': [True, 97.60161392405064]}}	[u'AF-P0A867-F1-model_v2_&_NOBFS_0']	316	1	1	1
AF-P0A870-F1-model_v2_&_NOBFS_0	ALPHAFOLD	{u'b0008': 1}	97.8245	{u'b0008': {u'A': [True, 97.82454258675078]}}	[u'AF-P0A870-F1-model_v2_&_NOBFS_0']	317	1	1	1
AF-P0A873-F1-model_v2_&_NOBFS_0	ALPHAFOLD	{u'b2607': 1}	95.0503	{u'b2607': {u'A': [True, 95.0503137254902]}}	[u'AF-P0A873-F1-model_v2_&_NOBFS_0']	255	1	1	1
AF-P0A877-F1-model_v2_&_NOBFS_0	ALPHAFOLD	{u'b1260': 1}	95.2097	{u'b1260': {u'A': [True, 95.2096641791045]}}	[u'AF-P0A877-F1-model_v2_&_NOBFS_0']	268	1	1	1
AF-P0A879-F1-model_v2_&_NOBFS_0	ALPHAFOLD	{u'b1261': 1}	97.0371	{u'b1261': {u'A': [True, 97.0371032745592]}}	[u'AF-P0A879-F1-model_v2_&_NOBFS_0']	397	1	1	1
AF-P0A881-F1-model_v2_&_NOBFS_0	ALPHAFOLD	{u'b4393': 1}	92.6658	{u'b4393': {u'A': [True, 92.66583333333334]}}	[u'AF-P0A881-F1-model_v2_&_NOBFS_0']	108	1	1	1
AF-P0A884-F1-model_v2_&_NOBFS_0	ALPHAFOLD	{u'b2827': 1}	97.7307	{u'b2827': {u'A': [True, 97.73071969696971]}}	[u'AF-P0A884-F1-model_v2_&_NOBFS_0']	264	1	1	1
AF-P0A887-F1-model_v2_&_NOBFS_0	ALPHAFOLD	{u'b3833': 1}	90.3027	{u'b3833': {u'A': [True, 90.3027091633466]}}	[u'AF-P0A887-F1-model_v2_&_NOBFS_0']	251	1	1	1
AF-P0A890-F1-model_v2_&_NOBFS_0	ALPHAFOLD	{u'b3470': 1}	92.7748	{u'b3470': {u'A': [True, 92.77481481481482]}}	[u'AF-P0A890-F1-model_v2_&_NOBFS_0']	81	1	1	1
AF-P0A894-F1-model_v2_&_NOBFS_0	ALPHAFOLD	{u'b3205': 1}	89.7786	{u'b3205': {u'A': [True, 89.77859154929577]}}	[u'AF-P0A894-F1-model_v2_&_NOBFS_0']	284	1	1	1
AF-P0A898-F1-model_v2_&_NOBFS_0	ALPHAFOLD	{u'b0659': 1}	94.4125	{u'b0659': {u'A': [True, 94.41245161290323]}}	[u'AF-P0A898-F1-model_v2_&_NOBFS_0']	155	1	1	1
AF-P0A8A0-F1-model_v2_&_NOBFS_0	ALPHAFOLD	{u'b1864': 1}	91.9658	{u'b1864': {u'A': [True, 91.96577235772357]}}	[u'AF-P0A8A0-F1-model_v2_&_NOBFS_0']	246	1	1	1
AF-P0A8A2-F1-model_v2_&_NOBFS_0	ALPHAFOLD	{u'b1983': 1}	92.7558	{u'b1983': {u'A': [True, 92.75579831932772]}}	[u'AF-P0A8A2-F1-model_v2_&_NOBFS_0']	238	1	1	1
AF-P0A8A4-F1-model_v2_&_NOBFS_0	ALPHAFOLD	{u'b1703': 1}	90.9823	{u'b1703': {u'A': [True, 90.98231046931407]}}	[u'AF-P0A8A4-F1-model_v2_&_NOBFS_0']	277	1	1	1
AF-P0A8A8-F1-model_v2_&_NOBFS_0	ALPHAFOLD	{u'b3170': 1}	96.1699	{u'b3170': {u'A': [True, 96.16986666666668]}}	[u'AF-P0A8A8-F1-model_v2_&_NOBFS_0']	150	1	1	1
AF-P0A8B2-F1-model_v2_&_NOBFS_0	ALPHAFOLD	{u'b2331': 1}	89.4066	{u'b2331': {u'A': [True, 89.40655737704917]}}	[u'AF-P0A8B2-F1-model_v2_&_NOBFS_0']	183	1	1	1
AF-P0A8B5-F1-model_v2_&_NOBFS_0	ALPHAFOLD	{u'b0471': 1}	88.1191	{u'b0471': {u'A': [True, 88.11908256880736]}}	[u'AF-P0A8B5-F1-model_v2_&_NOBFS_0']	109	1	1	1
AF-P0A8C1-F1-model_v2_&_NOBFS_0	ALPHAFOLD	{u'b0866': 1}	90.0338	{u'b0866': {u'A': [True, 90.03383177570093]}}	[u'AF-P0A8C1-F1-model_v2_&_NOBFS_0']	107	1	1	1
AF-P0A8C4-F1-model_v2_&_NOBFS_0	ALPHAFOLD	{u'b2909': 1}	91.8917	{u'b2909': {u'A': [True, 91.89166666666667]}}	[u'AF-P0A8C4-F1-model_v2_&_NOBFS_0']	192	1	1	1
AF-P0A8C8-F1-model_v2_&_NOBFS_0	ALPHAFOLD	{u'b4557': 1}	77.5525	{u'b4557': {u'A': [True, 77.5524705882353]}}	[u'AF-P0A8C8-F1-model_v2_&_NOBFS_0']	85	1	1	1
AF-P0A8D0-F1-model_v2_&_NOBFS_0	ALPHAFOLD	{u'b0413': 1}	92.9134	{u'b0413': {u'A': [True, 92.91335570469799]}}	[u'AF-P0A8D0-F1-model_v2_&_NOBFS_0']	149	1	1	1
AF-P0A8D3-F1-model_v2_&_NOBFS_0	ALPHAFOLD	{u'b0387': 1}	90.6401	{u'b0387': {u'A': [True, 90.6400657894737]}}	[u'AF-P0A8D3-F1-model_v2_&_NOBFS_0']	152	1	1	1
AF-P0A8D6-F1-model_v2_&_NOBFS_0	ALPHAFOLD	{u'b1045': 1}	95.8975	{u'b1045': {u'A': [True, 95.89751412429379]}}	[u'AF-P0A8D6-F1-model_v2_&_NOBFS_0']	177	1	1	1
AF-P0A8D9-F1-model_v2_&_NOBFS_0	ALPHAFOLD	{u'b2295': 1}	82.2323	{u'b2295': {u'A': [True, 82.23225165562914]}}	[u'AF-P0A8D9-F1-model_v2_&_NOBFS_0']	151	1	1	1
AF-P0A8E1-F1-model_v2_&_NOBFS_0	ALPHAFOLD	{u'b1108': 1}	94.6222	{u'b1108': {u'A': [True, 94.62222222222222]}}	[u'AF-P0A8E1-F1-model_v2_&_NOBFS_0']	180	1	1	1
AF-P0A8E5-F1-model_v2_&_NOBFS_0	ALPHAFOLD	{u'b0119': 1}	89.2534	{u'b0119': {u'A': [True, 89.25341666666667]}}	[u'AF-P0A8E5-F1-model_v2_&_NOBFS_0']	120	1	1	1
AF-P0A8E7-F1-model_v2_&_NOBFS_0	ALPHAFOLD	{u'b0426': 1}	96.7732	{u'b0426': {u'A': [True, 96.77319018404907]}}	[u'AF-P0A8E7-F1-model_v2_&_NOBFS_0']	163	1	1	1
AF-P0A8F0-F1-model_v2_&_NOBFS_0	ALPHAFOLD	{u'b2498': 1}	97.296	{u'b2498': {u'A': [True, 97.29596153846153]}}	[u'AF-P0A8F0-F1-model_v2_&_NOBFS_0']	208	1	1	1
AF-P0A8F4-F1-model_v2_&_NOBFS_0	ALPHAFOLD	{u'b2066': 1}	95.3152	{u'b2066': {u'A': [True, 95.31521126760563]}}	[u'AF-P0A8F4-F1-model_v2_&_NOBFS_0']	213	1	1	1
AF-P0A8F8-F1-model_v2_&_NOBFS_0	ALPHAFOLD	{u'b0779': 1}	88.5618	{u'b0779': {u'A': [True, 88.56182763744428]}}	[u'AF-P0A8F8-F1-model_v2_&_NOBFS_0']	673	1	1	1
AF-P0A8G0-F1-model_v2_&_NOBFS_0	ALPHAFOLD	{u'b1913': 1}	84.1787	{u'b1913': {u'A': [True, 84.17873770491803]}}	[u'AF-P0A8G0-F1-model_v2_&_NOBFS_0']	610	1	1	1
AF-P0A8G3-F1-model_v2_&_NOBFS_0	ALPHAFOLD	{u'b3092': 1}	97.6637	{u'b3092': {u'A': [True, 97.66372340425531]}}	[u'AF-P0A8G3-F1-model_v2_&_NOBFS_0']	470	1	1	1
AF-P0A8G6-F1-model_v2_&_NOBFS_0	ALPHAFOLD	{u'b1004': 1}	97.7765	{u'b1004': {u'A': [True, 97.77651515151516]}}	[u'AF-P0A8G6-F1-model_v2_&_NOBFS_0']	198	1	1	1
AF-P0A8G9-F1-model_v2_&_NOBFS_0	ALPHAFOLD	{u'b0422': 1}	84.2458	{u'b0422': {u'A': [True, 84.24575]}}	[u'AF-P0A8G9-F1-model_v2_&_NOBFS_0']	80	1	1	1
AF-P0A8H3-F1-model_v2_&_NOBFS_0	ALPHAFOLD	{u'b3040': 1}	86.4523	{u'b3040': {u'A': [True, 86.4523346303502]}}	[u'AF-P0A8H3-F1-model_v2_&_NOBFS_0']	257	1	1	1
AF-P0A8H6-F1-model_v2_&_NOBFS_0	ALPHAFOLD	{u'b3866': 1}	73.2195	{u'b3866': {u'A': [True, 73.2194674556213]}}	[u'AF-P0A8H6-F1-model_v2_&_NOBFS_0']	169	1	1	1
AF-P0A8H8-F1-model_v2_&_NOBFS_0	ALPHAFOLD	{u'b0101': 1}	87.4488	{u'b0101': {u'A': [True, 87.44876923076923]}}	[u'AF-P0A8H8-F1-model_v2_&_NOBFS_0']	65	1	1	1
AF-P0A8I1-F1-model_v2_&_NOBFS_0	ALPHAFOLD	{u'b2949': 1}	86.3584	{u'b2949': {u'A': [True, 86.35840579710144]}}	[u'AF-P0A8I1-F1-model_v2_&_NOBFS_0']	138	1	1	1
AF-P0A8I3-F1-model_v2_&_NOBFS_0	ALPHAFOLD	{u'b0006': 1}	97.5196	{u'b0006': {u'A': [True, 97.51957364341085]}}	[u'AF-P0A8I3-F1-model_v2_&_NOBFS_0']	258	1	1	1
AF-P0A8I5-F1-model_v2_&_NOBFS_0	ALPHAFOLD	{u'b2960': 1}	94.1069	{u'b2960': {u'A': [True, 94.10686192468619]}}	[u'AF-P0A8I5-F1-model_v2_&_NOBFS_0']	239	1	1	1
AF-P0A8I8-F1-model_v2_&_NOBFS_0	ALPHAFOLD	{u'b0636': 1}	96.9179	{u'b0636': {u'A': [True, 96.91793548387098]}}	[u'AF-P0A8I8-F1-model_v2_&_NOBFS_0']	155	1	1	1
AF-P0A8J2-F1-model_v2_&_NOBFS_0	ALPHAFOLD	{u'b4362': 1}	81.1503	{u'b4362': {u'A': [True, 81.15027932960892]}}	[u'AF-P0A8J2-F1-model_v2_&_NOBFS_0']	179	1	1	1
AF-P0A8J4-F1-model_v2_&_NOBFS_0	ALPHAFOLD	{u'b0631': 1}	86.7109	{u'b0631': {u'A': [True, 86.7109195402299]}}	[u'AF-P0A8J4-F1-model_v2_&_NOBFS_0']	87	1	1	1
AF-P0A8J8-F1-model_v2_&_NOBFS_0	ALPHAFOLD	{u'b3780': 1}	89.1712	{u'b3780': {u'A': [True, 89.1712351543943]}}	[u'AF-P0A8J8-F1-model_v2_&_NOBFS_0']	421	1	1	1
AF-P0A8K1-F1-model_v2_&_NOBFS_0	ALPHAFOLD	{u'b4160': 1}	90.8634	{u'b4160': {u'A': [True, 90.86341614906833]}}	[u'AF-P0A8K1-F1-model_v2_&_NOBFS_0']	322	1	1	1
AF-P0A8K5-F1-model_v2_&_NOBFS_0	ALPHAFOLD	{u'b4406': 1}	94.6211	{u'b4406': {u'A': [True, 94.62106060606061]}}	[u'AF-P0A8K5-F1-model_v2_&_NOBFS_0']	66	1	1	1
AF-P0A8K8-F1-model_v2_&_NOBFS_0	ALPHAFOLD	{u'b3886': 1}	79.3589	{u'b3886': {u'A': [True, 79.35886206896552]}}	[u'AF-P0A8K8-F1-model_v2_&_NOBFS_0']	290	1	1	1
AF-P0A8L1-F1-model_v2_&_NOBFS_0	ALPHAFOLD	{u'b0893': 1}	96.757	{u'b0893': {u'A': [True, 96.75695348837209]}}	[u'AF-P0A8L1-F1-model_v2_&_NOBFS_0']	430	1	1	1
AF-P0A8L5-F1-model_v2_&_NOBFS_0	ALPHAFOLD	{u'b1181': 1}	92.9327	{u'b1181': {u'A': [True, 92.9327450980392]}}	[u'AF-P0A8L5-F1-model_v2_&_NOBFS_0']	153	1	1	1
AF-P0A8L7-F1-model_v2_&_NOBFS_0	ALPHAFOLD	{u'b1248': 1}	86.0713	{u'b1248': {u'A': [True, 86.07128440366971]}}	[u'AF-P0A8L7-F1-model_v2_&_NOBFS_0']	109	1	1	1
AF-P0A8M0-F1-model_v2_&_NOBFS_0	ALPHAFOLD	{u'b0930': 1}	95.8114	{u'b0930': {u'A': [True, 95.81141630901287]}}	[u'AF-P0A8M0-F1-model_v2_&_NOBFS_0']	466	1	1	1
AF-P0A8M3-F1-model_v2_&_NOBFS_0	ALPHAFOLD	{u'b1719': 1}	94.3419	{u'b1719': {u'A': [True, 94.34194704049844]}}	[u'AF-P0A8M3-F1-model_v2_&_NOBFS_0']	642	1	1	1
AF-P0A8M6-F1-model_v2_&_NOBFS_0	ALPHAFOLD	{u'b2007': 1}	92.2498	{u'b2007': {u'A': [True, 92.24981651376144]}}	[u'AF-P0A8M6-F1-model_v2_&_NOBFS_0']	109	1	1	1
AF-P0A8N0-F1-model_v2_&_NOBFS_0	ALPHAFOLD	{u'b0956': 1}	94.7503	{u'b0956': {u'A': [True, 94.75033333333333]}}	[u'AF-P0A8N0-F1-model_v2_&_NOBFS_0']	150	1	1	1
AF-P0A8N3-F1-model_v2_&_NOBFS_0	ALPHAFOLD	{u'b2890': 1}	95.1569	{u'b2890': {u'A': [True, 95.15685148514851]}}	[u'AF-P0A8N3-F1-model_v2_&_NOBFS_0']	505	1	1	1
AF-P0A8N5-F1-model_v2_&_NOBFS_0	ALPHAFOLD	{u'b4129': 1}	94.6304	{u'b4129': {u'A': [True, 94.63037623762375]}}	[u'AF-P0A8N5-F1-model_v2_&_NOBFS_0']	505	1	1	1
AF-P0A8N7-F1-model_v2_&_NOBFS_0	ALPHAFOLD	{u'b4155': 1}	96.0306	{u'b4155': {u'A': [True, 96.03058461538463]}}	[u'AF-P0A8N7-F1-model_v2_&_NOBFS_0']	325	1	1	1
AF-P0A8P1-F1-model_v2_&_NOBFS_0	ALPHAFOLD	{u'b0885': 1}	95.8776	{u'b0885': {u'A': [True, 95.87760683760683]}}	[u'AF-P0A8P1-F1-model_v2_&_NOBFS_0']	234	1	1	1
AF-P0A8P3-F1-model_v2_&_NOBFS_0	ALPHAFOLD	{u'b2962': 1}	79.6009	{u'b2962': {u'A': [True, 79.60087912087913]}}	[u'AF-P0A8P3-F1-model_v2_&_NOBFS_0']	91	1	1	1
AF-P0A8P6-F1-model_v2_&_NOBFS_0	ALPHAFOLD	{u'b3811': 1}	89.0713	{u'b3811': {u'A': [True, 89.07130872483222]}}	[u'AF-P0A8P6-F1-model_v2_&_NOBFS_0']	298	1	1	1
AF-P0A8P8-F1-model_v2_&_NOBFS_0	ALPHAFOLD	{u'b2894': 1}	86.8626	{u'b2894': {u'A': [True, 86.86261744966443]}}	[u'AF-P0A8P8-F1-model_v2_&_NOBFS_0']	298	1	1	1
AF-P0A8Q0-F1-model_v2_&_NOBFS_0	ALPHAFOLD	{u'b4152': 1}	95.5981	{u'b4152': {u'A': [True, 95.59809160305343]}}	[u'AF-P0A8Q0-F1-model_v2_&_NOBFS_0']	131	1	1	1
AF-P0A8Q3-F1-model_v2_&_NOBFS_0	ALPHAFOLD	{u'b4151': 1}	96.5319	{u'b4151': {u'A': [True, 96.53193277310925]}}	[u'AF-P0A8Q3-F1-model_v2_&_NOBFS_0']	119	1	1	1
AF-P0A8Q6-F1-model_v2_&_NOBFS_0	ALPHAFOLD	{u'b0881': 1}	92.04	{u'b0881': {u'A': [True, 92.03999999999999]}}	[u'AF-P0A8Q6-F1-model_v2_&_NOBFS_0']	106	1	1	1
AF-P0A8R0-F1-model_v2_&_NOBFS_0	ALPHAFOLD	{u'b3929': 1}	97.5671	{u'b3929': {u'A': [True, 97.56708074534161]}}	[u'AF-P0A8R0-F1-model_v2_&_NOBFS_0']	161	1	1	1
AF-P0A8R4-F1-model_v2_&_NOBFS_0	ALPHAFOLD	{u'b3348': 1}	89.7218	{u'b3348': {u'A': [True, 89.72180555555555]}}	[u'AF-P0A8R4-F1-model_v2_&_NOBFS_0']	72	1	1	1
AF-P0A8R7-F1-model_v2_&_NOBFS_0	ALPHAFOLD	{u'b1322': 1}	72.4098	{u'b1322': {u'A': [True, 72.4097733711048]}}	[u'AF-P0A8R7-F1-model_v2_&_NOBFS_0']	353	1	1	1
AF-P0A8R9-F1-model_v2_&_NOBFS_0	ALPHAFOLD	{u'b4480': 1}	89.8303	{u'b4480': {u'A': [True, 89.83028673835126]}}	[u'AF-P0A8R9-F1-model_v2_&_NOBFS_0']	279	1	1	1
AF-P0A8S1-F1-model_v2_&_NOBFS_0	ALPHAFOLD	{u'b2916': 1}	91.268	{u'b2916': {u'A': [True, 91.26804713804714]}}	[u'AF-P0A8S1-F1-model_v2_&_NOBFS_0']	297	1	1	1
AF-P0A8S5-F1-model_v2_&_NOBFS_0	ALPHAFOLD	{u'b3494': 1}	94.1502	{u'b3494': {u'A': [True, 94.15018018018019]}}	[u'AF-P0A8S5-F1-model_v2_&_NOBFS_0']	111	1	1	1
AF-P0A8S9-F1-model_v2_&_NOBFS_0	ALPHAFOLD	{u'b1892': 1}	87.2607	{u'b1892': {u'A': [True, 87.26068965517243]}}	[u'AF-P0A8S9-F1-model_v2_&_NOBFS_0']	116	1	1	1
AF-P0A8T1-F1-model_v2_&_NOBFS_0	ALPHAFOLD	{u'b3259': 1}	87.2399	{u'b3259': {u'A': [True, 87.23993174061434]}}	[u'AF-P0A8T1-F1-model_v2_&_NOBFS_0']	293	1	1	1
AF-P0A8T5-F1-model_v2_&_NOBFS_0	ALPHAFOLD	{u'b1937': 1}	84.358	{u'b1937': {u'A': [True, 84.35798076923076]}}	[u'AF-P0A8T5-F1-model_v2_&_NOBFS_0']	104	1	1	1
AF-P0A8T7-F1-model_v2_&_NOBFS_0	ALPHAFOLD	{u'b3988': 1}	85.916	{u'b3988': {u'A': [True, 85.91599147121535]}}	[u'AF-P0A8T7-F1-model_v2_&_NOBFS_0']	1407	1	1	1
AF-P0A8U0-F1-model_v2_&_NOBFS_0	ALPHAFOLD	{u'b2793': 1}	97.5052	{u'b2793': {u'A': [True, 97.50524861878453]}}	[u'AF-P0A8U0-F1-model_v2_&_NOBFS_0']	181	1	1	1
AF-P0A8U2-F1-model_v2_&_NOBFS_0	ALPHAFOLD	{u'b0209': 1}	89.6034	{u'b0209': {u'A': [True, 89.60342105263159]}}	[u'AF-P0A8U2-F1-model_v2_&_NOBFS_0']	266	1	1	1
AF-P0A8U6-F1-model_v2_&_NOBFS_0	ALPHAFOLD	{u'b3938': 1}	94.3202	{u'b3938': {u'A': [True, 94.32019047619046]}}	[u'AF-P0A8U6-F1-model_v2_&_NOBFS_0']	105	1	1	1
AF-P0A8V0-F1-model_v2_&_NOBFS_0	ALPHAFOLD	{u'b2268': 1}	96.9321	{u'b2268': {u'A': [True, 96.93206557377049]}}	[u'AF-P0A8V0-F1-model_v2_&_NOBFS_0']	305	1	1	1
AF-P0A8V2-F1-model_v2_&_NOBFS_0	ALPHAFOLD	{u'b3987': 1}	90.1798	{u'b3987': {u'A': [True, 90.17981371087929]}}	[u'AF-P0A8V2-F1-model_v2_&_NOBFS_0']	1342	1	1	1
AF-P0A8V6-F1-model_v2_&_NOBFS_0	ALPHAFOLD	{u'b1187': 1}	91.9844	{u'b1187': {u'A': [True, 91.98435146443515]}}	[u'AF-P0A8V6-F1-model_v2_&_NOBFS_0']	239	1	1	1
AF-P0A8W0-F1-model_v2_&_NOBFS_0	ALPHAFOLD	{u'b3226': 1}	88.4627	{u'b3226': {u'A': [True, 88.46269961977185]}}	[u'AF-P0A8W0-F1-model_v2_&_NOBFS_0']	263	1	1	1
AF-P0A8W2-F1-model_v2_&_NOBFS_0	ALPHAFOLD	{u'b1642': 1}	93.8928	{u'b1642': {u'A': [True, 93.89284722222222]}}	[u'AF-P0A8W2-F1-model_v2_&_NOBFS_0']	144	1	1	1
AF-P0A8W5-F1-model_v2_&_NOBFS_0	ALPHAFOLD	{u'b2948': 1}	88.252	{u'b2948': {u'A': [True, 88.25203208556152]}}	[u'AF-P0A8W5-F1-model_v2_&_NOBFS_0']	187	1	1	1
AF-P0A8W8-F1-model_v2_&_NOBFS_0	ALPHAFOLD	{u'b2294': 1}	95.5885	{u'b2294': {u'A': [True, 95.58853658536584]}}	[u'AF-P0A8W8-F1-model_v2_&_NOBFS_0']	164	1	1	1
AF-P0A8X0-F1-model_v2_&_NOBFS_0	ALPHAFOLD	{u'b4234': 1}	87.8201	{u'b4234': {u'A': [True, 87.82010928961748]}}	[u'AF-P0A8X0-F1-model_v2_&_NOBFS_0']	183	1	1	1
AF-P0A8X2-F1-model_v2_&_NOBFS_0	ALPHAFOLD	{u'b1056': 1}	92.9876	{u'b1056': {u'A': [True, 92.98764397905761]}}	[u'AF-P0A8X2-F1-model_v2_&_NOBFS_0']	191	1	1	1
AF-P0A8X4-F1-model_v2_&_NOBFS_0	ALPHAFOLD	{u'b0964': 1}	82.0504	{u'b0964': {u'A': [True, 82.05036363636364]}}	[u'AF-P0A8X4-F1-model_v2_&_NOBFS_0']	220	1	1	1
AF-P0A8Y1-F1-model_v2_&_NOBFS_0	ALPHAFOLD	{u'b4374': 1}	96.4645	{u'b4374': {u'A': [True, 96.4644888888889]}}	[u'AF-P0A8Y1-F1-model_v2_&_NOBFS_0']	225	1	1	1
AF-P0A8Y3-F1-model_v2_&_NOBFS_0	ALPHAFOLD	{u'b3885': 1}	94.5796	{u'b3885': {u'A': [True, 94.57959798994975]}}	[u'AF-P0A8Y3-F1-model_v2_&_NOBFS_0']	199	1	1	1
AF-P0A8Y5-F1-model_v2_&_NOBFS_0	ALPHAFOLD	{u'b3697': 1}	97.685	{u'b3697': {u'A': [True, 97.685]}}	[u'AF-P0A8Y5-F1-model_v2_&_NOBFS_0']	270	1	1	1
AF-P0A8Y8-F1-model_v2_&_NOBFS_0	ALPHAFOLD	{u'b0597': 1}	98.0721	{u'b0597': {u'A': [True, 98.07211678832117]}}	[u'AF-P0A8Y8-F1-model_v2_&_NOBFS_0']	137	1	1	1
AF-P0A8Z0-F1-model_v2_&_NOBFS_0	ALPHAFOLD	{u'b1253': 1}	94.5795	{u'b1253': {u'A': [True, 94.57946969696971]}}	[u'AF-P0A8Z0-F1-model_v2_&_NOBFS_0']	132	1	1	1
AF-P0A8Z3-F1-model_v2_&_NOBFS_0	ALPHAFOLD	{u'b0736': 1}	96.3299	{u'b0736': {u'A': [True, 96.32985074626865]}}	[u'AF-P0A8Z3-F1-model_v2_&_NOBFS_0']	134	1	1	1
AF-P0A8Z7-F1-model_v2_&_NOBFS_0	ALPHAFOLD	{u'b3031': 1}	97.0706	{u'b3031': {u'A': [True, 97.07062176165803]}}	[u'AF-P0A8Z7-F1-model_v2_&_NOBFS_0']	193	1	1	1
AF-P0A901-F1-model_v2_&_NOBFS_0	ALPHAFOLD	{u'b4149': 1}	91.1454	{u'b4149': {u'A': [True, 91.1453672316384]}}	[u'AF-P0A901-F1-model_v2_&_NOBFS_0']	177	1	1	1
AF-P0A903-F1-model_v2_&_NOBFS_0	ALPHAFOLD	{u'b2477': 1}	87.3688	{u'b2477': {u'A': [True, 87.36880813953489]}}	[u'AF-P0A903-F1-model_v2_&_NOBFS_0']	344	1	1	1
AF-P0A905-F1-model_v2_&_NOBFS_0	ALPHAFOLD	{u'b1641': 1}	69.782	{u'b1641': {u'A': [True, 69.782]}}	[u'AF-P0A905-F1-model_v2_&_NOBFS_0']	155	1	1	1
AF-P0A908-F1-model_v2_&_NOBFS_0	ALPHAFOLD	{u'b1782': 1}	88.5758	{u'b1782': {u'A': [True, 88.57576612903226]}}	[u'AF-P0A908-F1-model_v2_&_NOBFS_0']	248	1	1	1
AF-P0A910-F1-model_v2_&_NOBFS_0	ALPHAFOLD	{u'b0957': 1}	79.7016	{u'b0957': {u'A': [True, 79.70156069364162]}}	[u'AF-P0A910-F1-model_v2_&_NOBFS_0']	346	1	1	1
AF-P0A912-F1-model_v2_&_NOBFS_0	ALPHAFOLD	{u'b0741': 1}	83.7221	{u'b0741': {u'A': [True, 83.72213872832369]}}	[u'AF-P0A912-F1-model_v2_&_NOBFS_0']	173	1	1	1
AF-P0A915-F1-model_v2_&_NOBFS_0	ALPHAFOLD	{u'b1256': 1}	89.29	{u'b1256': {u'A': [True, 89.28995283018868]}}	[u'AF-P0A915-F1-model_v2_&_NOBFS_0']	212	1	1	1
AF-P0A917-F1-model_v2_&_NOBFS_0	ALPHAFOLD	{u'b0814': 1}	79.6313	{u'b0814': {u'A': [True, 79.63128654970761]}}	[u'AF-P0A917-F1-model_v2_&_NOBFS_0']	171	1	1	1
AF-P0A921-F1-model_v2_&_NOBFS_0	ALPHAFOLD	{u'b3821': 1}	92.5014	{u'b3821': {u'A': [True, 92.50138408304498]}}	[u'AF-P0A921-F1-model_v2_&_NOBFS_0']	289	1	1	1
AF-P0A924-F1-model_v2_&_NOBFS_0	ALPHAFOLD	{u'b1278': 1}	90.4311	{u'b1278': {u'A': [True, 90.43110236220473]}}	[u'AF-P0A924-F1-model_v2_&_NOBFS_0']	254	1	1	1
AF-P0A927-F1-model_v2_&_NOBFS_0	ALPHAFOLD	{u'b0411': 1}	89.4218	{u'b0411': {u'A': [True, 89.42183673469388]}}	[u'AF-P0A927-F1-model_v2_&_NOBFS_0']	294	1	1	1
AF-P0A930-F1-model_v2_&_NOBFS_0	ALPHAFOLD	{u'b2062': 1}	87.8342	{u'b2062': {u'A': [True, 87.83419525065963]}}	[u'AF-P0A930-F1-model_v2_&_NOBFS_0']	379	1	1	1
AF-P0A932-F1-model_v2_&_NOBFS_0	ALPHAFOLD	{u'b0983': 1}	93.0649	{u'b0983': {u'A': [True, 93.06488126649076]}}	[u'AF-P0A932-F1-model_v2_&_NOBFS_0']	379	1	1	1
AF-P0A935-F1-model_v2_&_NOBFS_0	ALPHAFOLD	{u'b2813': 1}	91.0216	{u'b2813': {u'A': [True, 91.02164383561644]}}	[u'AF-P0A935-F1-model_v2_&_NOBFS_0']	365	1	1	1
AF-P0A937-F1-model_v2_&_NOBFS_0	ALPHAFOLD	{u'b2617': 1}	91.4658	{u'b2617': {u'A': [True, 91.4658407079646]}}	[u'AF-P0A937-F1-model_v2_&_NOBFS_0']	113	1	1	1
AF-P0A940-F1-model_v2_&_NOBFS_0	ALPHAFOLD	{u'b0177': 1}	91.2993	{u'b0177': {u'A': [True, 91.2992839506173]}}	[u'AF-P0A940-F1-model_v2_&_NOBFS_0']	810	1	1	1
AF-P0A944-F1-model_v2_&_NOBFS_0	ALPHAFOLD	{u'b4373': 1}	97.0123	{u'b4373': {u'A': [True, 97.0122972972973]}}	[u'AF-P0A944-F1-model_v2_&_NOBFS_0']	148	1	1	1
AF-P0A948-F1-model_v2_&_NOBFS_0	ALPHAFOLD	{u'b1066': 1}	94.1361	{u'b1066': {u'A': [True, 94.13608247422677]}}	[u'AF-P0A948-F1-model_v2_&_NOBFS_0']	194	1	1	1
AF-P0A951-F1-model_v2_&_NOBFS_0	ALPHAFOLD	{u'b1584': 1}	90.0358	{u'b1584': {u'A': [True, 90.03575268817205]}}	[u'AF-P0A951-F1-model_v2_&_NOBFS_0']	186	1	1	1
AF-P0A953-F1-model_v2_&_NOBFS_0	ALPHAFOLD	{u'b2323': 1}	97.8952	{u'b2323': {u'A': [True, 97.89519704433496]}}	[u'AF-P0A953-F1-model_v2_&_NOBFS_0']	406	1	1	1
AF-P0A955-F1-model_v2_&_NOBFS_0	ALPHAFOLD	{u'b1850': 1}	97.8848	{u'b1850': {u'A': [True, 97.88483568075118]}}	[u'AF-P0A955-F1-model_v2_&_NOBFS_0']	213	1	1	1
AF-P0A959-F1-model_v2_&_NOBFS_0	ALPHAFOLD	{u'b2290': 1}	96.1949	{u'b2290': {u'A': [True, 96.19488888888887]}}	[u'AF-P0A959-F1-model_v2_&_NOBFS_0']	405	1	1	1
AF-P0A962-F1-model_v2_&_NOBFS_0	ALPHAFOLD	{u'b1767': 1}	96.0511	{u'b1767': {u'A': [True, 96.0510650887574]}}	[u'AF-P0A962-F1-model_v2_&_NOBFS_0']	338	1	1	1
AF-P0A964-F1-model_v2_&_NOBFS_0	ALPHAFOLD	{u'b1887': 1}	74.9725	{u'b1887': {u'A': [True, 74.97251497005988]}}	[u'AF-P0A964-F1-model_v2_&_NOBFS_0']	167	1	1	1
AF-P0A968-F1-model_v2_&_NOBFS_0	ALPHAFOLD	{u'b0880': 1}	86.0495	{u'b0880': {u'A': [True, 86.04945945945947]}}	[u'AF-P0A968-F1-model_v2_&_NOBFS_0']	74	1	1	1
AF-P0A972-F1-model_v2_&_NOBFS_0	ALPHAFOLD	{u'b0623': 1}	91.0865	{u'b0623': {u'A': [True, 91.08652173913045]}}	[u'AF-P0A972-F1-model_v2_&_NOBFS_0']	69	1	1	1
AF-P0A976-F1-model_v2_&_NOBFS_0	ALPHAFOLD	{u'b1558': 1}	88.98	{u'b1558': {u'A': [True, 88.98]}}	[u'AF-P0A976-F1-model_v2_&_NOBFS_0']	70	1	1	1
AF-P0A978-F1-model_v2_&_NOBFS_0	ALPHAFOLD	{u'b0990': 1}	88.6054	{u'b0990': {u'A': [True, 88.6054285714286]}}	[u'AF-P0A978-F1-model_v2_&_NOBFS_0']	70	1	1	1
AF-P0A982-F1-model_v2_&_NOBFS_0	ALPHAFOLD	{u'b0989': 1}	88.2256	{u'b0989': {u'A': [True, 88.22557142857141]}}	[u'AF-P0A982-F1-model_v2_&_NOBFS_0']	70	1	1	1
AF-P0A986-F1-model_v2_&_NOBFS_0	ALPHAFOLD	{u'b1552': 1}	87.7063	{u'b1552': {u'A': [True, 87.7062857142857]}}	[u'AF-P0A986-F1-model_v2_&_NOBFS_0']	70	1	1	1
AF-P0A988-F1-model_v2_&_NOBFS_0	ALPHAFOLD	{u'b3701': 1}	95.3987	{u'b3701': {u'A': [True, 95.39868852459016]}}	[u'AF-P0A988-F1-model_v2_&_NOBFS_0']	366	1	1	1
AF-P0A991-F1-model_v2_&_NOBFS_0	ALPHAFOLD	{u'b2097': 1}	97.2619	{u'b2097': {u'A': [True, 97.26194285714286]}}	[u'AF-P0A991-F1-model_v2_&_NOBFS_0']	350	1	1	1
AF-P0A993-F1-model_v2_&_NOBFS_0	ALPHAFOLD	{u'b4232': 1}	93.143	{u'b4232': {u'A': [True, 93.14298192771085]}}	[u'AF-P0A993-F1-model_v2_&_NOBFS_0']	332	1	1	1
AF-P0A996-F1-model_v2_&_NOBFS_0	ALPHAFOLD	{u'b2243': 1}	96.57	{u'b2243': {u'A': [True, 96.57002525252524]}}	[u'AF-P0A996-F1-model_v2_&_NOBFS_0']	396	1	1	1
AF-P0A998-F1-model_v2_&_NOBFS_0	ALPHAFOLD	{u'b1905': 1}	95.8994	{u'b1905': {u'A': [True, 95.89939393939393]}}	[u'AF-P0A998-F1-model_v2_&_NOBFS_0']	165	1	1	1
AF-P0A9A2-F1-model_v2_&_NOBFS_0	ALPHAFOLD	{u'b1902': 1}	94.5431	{u'b1902': {u'A': [True, 94.54311377245507]}}	[u'AF-P0A9A2-F1-model_v2_&_NOBFS_0']	167	1	1	1
AF-P0A9A6-F1-model_v2_&_NOBFS_0	ALPHAFOLD	{u'b0095': 1}	82.5298	{u'b0095': {u'A': [True, 82.52976501305481]}}	[u'AF-P0A9A6-F1-model_v2_&_NOBFS_0']	383	1	1	1
AF-P0A9A9-F1-model_v2_&_NOBFS_0	ALPHAFOLD	{u'b0683': 1}	93.0655	{u'b0683': {u'A': [True, 93.06547297297297]}}	[u'AF-P0A9A9-F1-model_v2_&_NOBFS_0']	148	1	1	1
AF-P0A9B2-F1-model_v2_&_NOBFS_0	ALPHAFOLD	{u'b1779': 1}	98.3407	{u'b1779': {u'A': [True, 98.34069486404834]}}	[u'AF-P0A9B2-F1-model_v2_&_NOBFS_0']	331	1	1	1
AF-P0A9B6-F1-model_v2_&_NOBFS_0	ALPHAFOLD	{u'b2927': 1}	97.1269	{u'b2927': {u'A': [True, 97.12690265486727]}}	[u'AF-P0A9B6-F1-model_v2_&_NOBFS_0']	339	1	1	1
AF-P0A9C0-F1-model_v2_&_NOBFS_0	ALPHAFOLD	{u'b2241': 1}	92.8392	{u'b2241': {u'A': [True, 92.83924354243541]}}	[u'AF-P0A9C0-F1-model_v2_&_NOBFS_0']	542	1	1	1
AF-P0A9C3-F1-model_v2_&_NOBFS_0	ALPHAFOLD	{u'b0756': 1}	97.7954	{u'b0756': {u'A': [True, 97.79537572254334]}}	[u'AF-P0A9C3-F1-model_v2_&_NOBFS_0']	346	1	1	1
AF-P0A9C5-F1-model_v2_&_NOBFS_0	ALPHAFOLD	{u'b3870': 1}	96.0642	{u'b3870': {u'A': [True, 96.06420042643921]}}	[u'AF-P0A9C5-F1-model_v2_&_NOBFS_0']	469	1	1	1
AF-P0A9C9-F1-model_v2_&_NOBFS_0	ALPHAFOLD	{u'b3925': 1}	96.0523	{u'b3925': {u'A': [True, 96.05232142857143]}}	[u'AF-P0A9C9-F1-model_v2_&_NOBFS_0']	336	1	1	1
AF-P0A9D2-F1-model_v2_&_NOBFS_0	ALPHAFOLD	{u'b1635': 1}	98.1072	{u'b1635': {u'A': [True, 98.10721393034825]}}	[u'AF-P0A9D2-F1-model_v2_&_NOBFS_0']	201	1	1	1
AF-P0A9D4-F1-model_v2_&_NOBFS_0	ALPHAFOLD	{u'b3607': 1}	95.1253	{u'b3607': {u'A': [True, 95.12531135531135]}}	[u'AF-P0A9D4-F1-model_v2_&_NOBFS_0']	273	1	1	1
AF-P0A9D8-F1-model_v2_&_NOBFS_0	ALPHAFOLD	{u'b0166': 1}	96.339	{u'b0166': {u'A': [True, 96.33901459854015]}}	[u'AF-P0A9D8-F1-model_v2_&_NOBFS_0']	274	1	1	1
AF-P0A9E0-F1-model_v2_&_NOBFS_0	ALPHAFOLD	{u'b0064': 1}	86.8826	{u'b0064': {u'A': [True, 86.88263698630138]}}	[u'AF-P0A9E0-F1-model_v2_&_NOBFS_0']	292	1	1	1
AF-P0A9E2-F1-model_v2_&_NOBFS_0	ALPHAFOLD	{u'b4062': 1}	94.3555	{u'b4062': {u'A': [True, 94.3555140186916]}}	[u'AF-P0A9E2-F1-model_v2_&_NOBFS_0']	107	1	1	1
AF-P0A9E5-F1-model_v2_&_NOBFS_0	ALPHAFOLD	{u'b1334': 1}	90.082	{u'b1334': {u'A': [True, 90.082]}}	[u'AF-P0A9E5-F1-model_v2_&_NOBFS_0']	250	1	1	1
AF-P0A9E9-F1-model_v2_&_NOBFS_0	ALPHAFOLD	{u'b2163': 1}	92.1953	{u'b2163': {u'A': [True, 92.19529680365297]}}	[u'AF-P0A9E9-F1-model_v2_&_NOBFS_0']	219	1	1	1
AF-P0A9F1-F1-model_v2_&_NOBFS_0	ALPHAFOLD	{u'b0817': 1}	91.0577	{u'b0817': {u'A': [True, 91.05767741935483]}}	[u'AF-P0A9F1-F1-model_v2_&_NOBFS_0']	155	1	1	1
AF-P0A9F3-F1-model_v2_&_NOBFS_0	ALPHAFOLD	{u'b1275': 1}	93.5561	{u'b1275': {u'A': [True, 93.55611111111111]}}	[u'AF-P0A9F3-F1-model_v2_&_NOBFS_0']	324	1	1	1
AF-P0A9F6-F1-model_v2_&_NOBFS_0	ALPHAFOLD	{u'b2808': 1}	91.4522	{u'b2808': {u'A': [True, 91.45219672131147]}}	[u'AF-P0A9F6-F1-model_v2_&_NOBFS_0']	305	1	1	1
AF-P0A9F9-F1-model_v2_&_NOBFS_0	ALPHAFOLD	{u'b3828': 1}	87.7103	{u'b3828': {u'A': [True, 87.7102523659306]}}	[u'AF-P0A9F9-F1-model_v2_&_NOBFS_0']	317	1	1	1
AF-P0A9G2-F1-model_v2_&_NOBFS_0	ALPHAFOLD	{u'b0020': 1}	89.511	{u'b0020': {u'A': [True, 89.5109634551495]}}	[u'AF-P0A9G2-F1-model_v2_&_NOBFS_0']	301	1	1	1
AF-P0A9G4-F1-model_v2_&_NOBFS_0	ALPHAFOLD	{u'b0487': 1}	94.1258	{u'b0487': {u'A': [True, 94.12577777777777]}}	[u'AF-P0A9G4-F1-model_v2_&_NOBFS_0']	135	1	1	1
AF-P0A9G6-F1-model_v2_&_NOBFS_0	ALPHAFOLD	{u'b4015': 1}	96.632	{u'b4015': {u'A': [True, 96.63200460829493]}}	[u'AF-P0A9G6-F1-model_v2_&_NOBFS_0']	434	1	1	1
AF-P0A9G8-F1-model_v2_&_NOBFS_0	ALPHAFOLD	{u'b0761': 1}	91.8794	{u'b0761': {u'A': [True, 91.87938931297711]}}	[u'AF-P0A9G8-F1-model_v2_&_NOBFS_0']	262	1	1	1
AF-P0A9H1-F1-model_v2_&_NOBFS_0	ALPHAFOLD	{u'b3068': 1}	96.2809	{u'b3068': {u'A': [True, 96.28089285714286]}}	[u'AF-P0A9H1-F1-model_v2_&_NOBFS_0']	168	1	1	1
AF-P0A9H3-F1-model_v2_&_NOBFS_0	ALPHAFOLD	{u'b4131': 1}	96.9877	{u'b4131': {u'A': [True, 96.98772027972028]}}	[u'AF-P0A9H3-F1-model_v2_&_NOBFS_0']	715	1	1	1
AF-P0A9H5-F1-model_v2_&_NOBFS_0	ALPHAFOLD	{u'b1270': 1}	94.5495	{u'b1270': {u'A': [True, 94.54948979591838]}}	[u'AF-P0A9H5-F1-model_v2_&_NOBFS_0']	196	1	1	1
AF-P0A9H7-F1-model_v2_&_NOBFS_0	ALPHAFOLD	{u'b1661': 1}	92.76	{u'b1661': {u'A': [True, 92.76002617801048]}}	[u'AF-P0A9H7-F1-model_v2_&_NOBFS_0']	382	1	1	1
AF-P0A9H9-F1-model_v2_&_NOBFS_0	ALPHAFOLD	{u'b1881': 1}	82.4495	{u'b1881': {u'A': [True, 82.4494859813084]}}	[u'AF-P0A9H9-F1-model_v2_&_NOBFS_0']	214	1	1	1
AF-P0A9I1-F1-model_v2_&_NOBFS_0	ALPHAFOLD	{u'b0616': 1}	95.3396	{u'b0616': {u'A': [True, 95.33960264900661]}}	[u'AF-P0A9I1-F1-model_v2_&_NOBFS_0']	302	1	1	1
AF-P0A9I3-F1-model_v2_&_NOBFS_0	ALPHAFOLD	{u'b2479': 1}	88.1931	{u'b2479': {u'A': [True, 88.1931052631579]}}	[u'AF-P0A9I3-F1-model_v2_&_NOBFS_0']	190	1	1	1
AF-P0A9I5-F1-model_v2_&_NOBFS_0	ALPHAFOLD	{u'b2207': 1}	82.396	{u'b2207': {u'A': [True, 82.39597701149425]}}	[u'AF-P0A9I5-F1-model_v2_&_NOBFS_0']	87	1	1	1
AF-P0A9I8-F1-model_v2_&_NOBFS_0	ALPHAFOLD	{u'b3366': 1}	95.6869	{u'b3366': {u'A': [True, 95.68685185185184]}}	[u'AF-P0A9I8-F1-model_v2_&_NOBFS_0']	108	1	1	1
AF-P0A9J0-F1-model_v2_&_NOBFS_0	ALPHAFOLD	{u'b3247': 1}	90.6431	{u'b3247': {u'A': [True, 90.64308793456033]}}	[u'AF-P0A9J0-F1-model_v2_&_NOBFS_0']	489	1	1	1
AF-P0A9J4-F1-model_v2_&_NOBFS_0	ALPHAFOLD	{u'b0425': 1}	94.7444	{u'b0425': {u'A': [True, 94.74435643564357]}}	[u'AF-P0A9J4-F1-model_v2_&_NOBFS_0']	303	1	1	1
AF-P0A9J6-F1-model_v2_&_NOBFS_0	ALPHAFOLD	{u'b3752': 1}	95.4053	{u'b3752': {u'A': [True, 95.40530744336569]}}	[u'AF-P0A9J6-F1-model_v2_&_NOBFS_0']	309	1	1	1
AF-P0A9J8-F1-model_v2_&_NOBFS_0	ALPHAFOLD	{u'b2599': 1}	92.7414	{u'b2599': {u'A': [True, 92.74137305699482]}}	[u'AF-P0A9J8-F1-model_v2_&_NOBFS_0']	386	1	1	1
AF-P0A9K1-F1-model_v2_&_NOBFS_0	ALPHAFOLD	{u'b1020': 1}	74.2108	{u'b1020': {u'A': [True, 74.21084745762711]}}	[u'AF-P0A9K1-F1-model_v2_&_NOBFS_0']	354	1	1	1
AF-P0A9K3-F1-model_v2_&_NOBFS_0	ALPHAFOLD	{u'b0660': 1}	84.7998	{u'b0660': {u'A': [True, 84.79982658959538]}}	[u'AF-P0A9K3-F1-model_v2_&_NOBFS_0']	346	1	1	1
AF-P0A9K7-F1-model_v2_&_NOBFS_0	ALPHAFOLD	{u'b3724': 1}	90.3072	{u'b3724': {u'A': [True, 90.30717842323651]}}	[u'AF-P0A9K7-F1-model_v2_&_NOBFS_0']	241	1	1	1
AF-P0A9K9-F1-model_v2_&_NOBFS_0	ALPHAFOLD	{u'b3349': 1}	72.4379	{u'b3349': {u'A': [True, 72.43785714285714]}}	[u'AF-P0A9K9-F1-model_v2_&_NOBFS_0']	196	1	1	1
AF-P0A9L3-F1-model_v2_&_NOBFS_0	ALPHAFOLD	{u'b4207': 1}	95.0506	{u'b4207': {u'A': [True, 95.05063106796116]}}	[u'AF-P0A9L3-F1-model_v2_&_NOBFS_0']	206	1	1	1
AF-P0A9L5-F1-model_v2_&_NOBFS_0	ALPHAFOLD	{u'b3775': 1}	81.9389	{u'b3775': {u'A': [True, 81.9389247311828]}}	[u'AF-P0A9L5-F1-model_v2_&_NOBFS_0']	93	1	1	1
AF-P0A9L8-F1-model_v2_&_NOBFS_0	ALPHAFOLD	{u'b0386': 1}	96.2178	{u'b0386': {u'A': [True, 96.217843866171]}}	[u'AF-P0A9L8-F1-model_v2_&_NOBFS_0']	269	1	1	1
AF-P0A9M0-F1-model_v2_&_NOBFS_0	ALPHAFOLD	{u'b0439': 1}	86.7501	{u'b0439': {u'A': [True, 86.75011479591838]}}	[u'AF-P0A9M0-F1-model_v2_&_NOBFS_0']	784	1	1	1
AF-P0A9M2-F1-model_v2_&_NOBFS_0	ALPHAFOLD	{u'b0125': 1}	93.3749	{u'b0125': {u'A': [True, 93.37494382022473]}}	[u'AF-P0A9M2-F1-model_v2_&_NOBFS_0']	178	1	1	1
AF-P0A9M5-F1-model_v2_&_NOBFS_0	ALPHAFOLD	{u'b0238': 1}	94.5876	{u'b0238': {u'A': [True, 94.58763157894737]}}	[u'AF-P0A9M5-F1-model_v2_&_NOBFS_0']	152	1	1	1
AF-P0A9M8-F1-model_v2_&_NOBFS_0	ALPHAFOLD	{u'b2297': 1}	87.2289	{u'b2297': {u'A': [True, 87.2289355742297]}}	[u'AF-P0A9M8-F1-model_v2_&_NOBFS_0']	714	1	1	1
AF-P0A9N0-F1-model_v2_&_NOBFS_0	ALPHAFOLD	{u'b3206': 1}	86.8561	{u'b3206': {u'A': [True, 86.85611111111112]}}	[u'AF-P0A9N0-F1-model_v2_&_NOBFS_0']	90	1	1	1
AF-P0A9N4-F1-model_v2_&_NOBFS_0	ALPHAFOLD	{u'b0902': 1}	96.3117	{u'b0902': {u'A': [True, 96.31166666666667]}}	[u'AF-P0A9N4-F1-model_v2_&_NOBFS_0']	246	1	1	1
AF-P0A9N8-F1-model_v2_&_NOBFS_0	ALPHAFOLD	{u'b4237': 1}	97.6676	{u'b4237': {u'A': [True, 97.6675974025974]}}	[u'AF-P0A9N8-F1-model_v2_&_NOBFS_0']	154	1	1	1
AF-P0A9P0-F1-model_v2_&_NOBFS_0	ALPHAFOLD	{u'b0116': 1}	97.1829	{u'b0116': {u'A': [True, 97.18289029535866]}}	[u'AF-P0A9P0-F1-model_v2_&_NOBFS_0']	474	1	1	1
AF-P0A9P4-F1-model_v2_&_NOBFS_0	ALPHAFOLD	{u'b0888': 1}	96.7137	{u'b0888': {u'A': [True, 96.71367601246105]}}	[u'AF-P0A9P4-F1-model_v2_&_NOBFS_0']	321	1	1	1
AF-P0A9P6-F1-model_v2_&_NOBFS_0	ALPHAFOLD	{u'b3162': 1}	79.2489	{u'b3162': {u'A': [True, 79.24888712241653]}}	[u'AF-P0A9P6-F1-model_v2_&_NOBFS_0']	629	1	1	1
AF-P0A9P9-F1-model_v2_&_NOBFS_0	ALPHAFOLD	{u'b4266': 1}	97.2753	{u'b4266': {u'A': [True, 97.27531496062993]}}	[u'AF-P0A9P9-F1-model_v2_&_NOBFS_0']	254	1	1	1
AF-P0A9Q1-F1-model_v2_&_NOBFS_0	ALPHAFOLD	{u'b4401': 1}	91.0908	{u'b4401': {u'A': [True, 91.090756302521]}}	[u'AF-P0A9Q1-F1-model_v2_&_NOBFS_0']	238	1	1	1
AF-P0A9Q5-F1-model_v2_&_NOBFS_0	ALPHAFOLD	{u'b2316': 1}	90.9204	{u'b2316': {u'A': [True, 90.9203947368421]}}	[u'AF-P0A9Q5-F1-model_v2_&_NOBFS_0']	304	1	1	1
AF-P0A9Q7-F1-model_v2_&_NOBFS_0	ALPHAFOLD	{u'b1241': 1}	94.6295	{u'b1241': {u'A': [True, 94.62945005611672]}}	[u'AF-P0A9Q7-F1-model_v2_&_NOBFS_0']	891	1	1	1
AF-P0A9Q9-F1-model_v2_&_NOBFS_0	ALPHAFOLD	{u'b3433': 1}	97.8886	{u'b3433': {u'A': [True, 97.88858310626703]}}	[u'AF-P0A9Q9-F1-model_v2_&_NOBFS_0']	367	1	1	1
AF-P0A9R2-F1-model_v2_&_NOBFS_0	ALPHAFOLD	{u'b0554': 1}	85.6235	{u'b0554': {u'A': [True, 85.62352112676056]}}	[u'AF-P0A9R2-F1-model_v2_&_NOBFS_0']	71	1	1	1
AF-P0A9R4-F1-model_v2_&_NOBFS_0	ALPHAFOLD	{u'b2525': 1}	96.3077	{u'b2525': {u'A': [True, 96.30774774774773]}}	[u'AF-P0A9R4-F1-model_v2_&_NOBFS_0']	111	1	1	1
AF-P0A9R7-F1-model_v2_&_NOBFS_0	ALPHAFOLD	{u'b3463': 1}	92.0177	{u'b3463': {u'A': [True, 92.01774774774776]}}	[u'AF-P0A9R7-F1-model_v2_&_NOBFS_0']	222	1	1	1
AF-P0A9S1-F1-model_v2_&_NOBFS_0	ALPHAFOLD	{u'b2799': 1}	98.4122	{u'b2799': {u'A': [True, 98.41219895287958]}}	[u'AF-P0A9S1-F1-model_v2_&_NOBFS_0']	382	1	1	1
AF-P0A9S3-F1-model_v2_&_NOBFS_0	ALPHAFOLD	{u'b2091': 1}	97.3493	{u'b2091': {u'A': [True, 97.34930635838151]}}	[u'AF-P0A9S3-F1-model_v2_&_NOBFS_0']	346	1	1	1
AF-P0A9S5-F1-model_v2_&_NOBFS_0	ALPHAFOLD	{u'b3945': 1}	97.2228	{u'b3945': {u'A': [True, 97.22280653950955]}}	[u'AF-P0A9S5-F1-model_v2_&_NOBFS_0']	367	1	1	1
AF-P0A9S7-F1-model_v2_&_NOBFS_0	ALPHAFOLD	{u'b3455': 1}	90.4399	{u'b3455': {u'A': [True, 90.43988235294117]}}	[u'AF-P0A9S7-F1-model_v2_&_NOBFS_0']	255	1	1	1
AF-P0A9T0-F1-model_v2_&_NOBFS_0	ALPHAFOLD	{u'b2913': 1}	95.6164	{u'b2913': {u'A': [True, 95.61636585365854]}}	[u'AF-P0A9T0-F1-model_v2_&_NOBFS_0']	410	1	1	1
AF-P0A9T4-F1-model_v2_&_NOBFS_0	ALPHAFOLD	{u'b2834': 1}	96.6407	{u'b2834': {u'A': [True, 96.64072254335258]}}	[u'AF-P0A9T4-F1-model_v2_&_NOBFS_0']	346	1	1	1
AF-P0A9T6-F1-model_v2_&_NOBFS_0	ALPHAFOLD	{u'b0483': 1}	95.1896	{u'b0483': {u'A': [True, 95.18955752212389]}}	[u'AF-P0A9T6-F1-model_v2_&_NOBFS_0']	113	1	1	1
AF-P0A9T8-F1-model_v2_&_NOBFS_0	ALPHAFOLD	{u'b0495': 1}	94.8685	{u'b0495': {u'A': [True, 94.86850877192981]}}	[u'AF-P0A9T8-F1-model_v2_&_NOBFS_0']	228	1	1	1
AF-P0A9U1-F1-model_v2_&_NOBFS_0	ALPHAFOLD	{u'b0794': 1}	90.5828	{u'b0794': {u'A': [True, 90.58278546712802]}}	[u'AF-P0A9U1-F1-model_v2_&_NOBFS_0']	578	1	1	1
AF-P0A9U3-F1-model_v2_&_NOBFS_0	ALPHAFOLD	{u'b0820': 1}	91.5043	{u'b0820': {u'A': [True, 91.50433962264151]}}	[u'AF-P0A9U3-F1-model_v2_&_NOBFS_0']	530	1	1	1
AF-P0A9U6-F1-model_v2_&_NOBFS_0	ALPHAFOLD	{u'b1299': 1}	89.7866	{u'b1299': {u'A': [True, 89.7865945945946]}}	[u'AF-P0A9U6-F1-model_v2_&_NOBFS_0']	185	1	1	1
AF-P0A9U8-F1-model_v2_&_NOBFS_0	ALPHAFOLD	{u'b1695': 1}	96.5552	{u'b1695': {u'A': [True, 96.55522193211489]}}	[u'AF-P0A9U8-F1-model_v2_&_NOBFS_0']	383	1	1	1
AF-P0A9V1-F1-model_v2_&_NOBFS_0	ALPHAFOLD	{u'b3201': 1}	94.8619	{u'b3201': {u'A': [True, 94.86190871369296]}}	[u'AF-P0A9V1-F1-model_v2_&_NOBFS_0']	241	1	1	1
AF-P0A9V5-F1-model_v2_&_NOBFS_0	ALPHAFOLD	{u'b3555': 1}	73.3986	{u'b3555': {u'A': [True, 73.39864583333333]}}	[u'AF-P0A9V5-F1-model_v2_&_NOBFS_0']	96	1	1	1
AF-P0A9V8-F1-model_v2_&_NOBFS_0	ALPHAFOLD	{u'b3882': 1}	97.4031	{u'b3882': {u'A': [True, 97.40312080536911]}}	[u'AF-P0A9V8-F1-model_v2_&_NOBFS_0']	298	1	1	1
AF-P0A9W0-F1-model_v2_&_NOBFS_0	ALPHAFOLD	{u'b4191': 1}	90.5286	{u'b4191': {u'A': [True, 90.52864541832669]}}	[u'AF-P0A9W0-F1-model_v2_&_NOBFS_0']	251	1	1	1
AF-P0A9W3-F1-model_v2_&_NOBFS_0	ALPHAFOLD	{u'b4391': 1}	88.0051	{u'b4391': {u'A': [True, 88.00509909909908]}}	[u'AF-P0A9W3-F1-model_v2_&_NOBFS_0']	555	1	1	1
AF-P0A9W6-F1-model_v2_&_NOBFS_0	ALPHAFOLD	{u'b3190': 1}	89.964	{u'b3190': {u'A': [True, 89.9640476190476]}}	[u'AF-P0A9W6-F1-model_v2_&_NOBFS_0']	84	1	1	1
AF-P0A9W9-F1-model_v2_&_NOBFS_0	ALPHAFOLD	{u'b3279': 1}	96.6527	{u'b3279': {u'A': [True, 96.65271739130434]}}	[u'AF-P0A9W9-F1-model_v2_&_NOBFS_0']	184	1	1	1
AF-P0A9X1-F1-model_v2_&_NOBFS_0	ALPHAFOLD	{u'b1858': 1}	85.5401	{u'b1858': {u'A': [True, 85.5400796812749]}}	[u'AF-P0A9X1-F1-model_v2_&_NOBFS_0']	251	1	1	1
AF-P0A9X4-F1-model_v2_&_NOBFS_0	ALPHAFOLD	{u'b3251': 1}	90.6508	{u'b3251': {u'A': [True, 90.65077809798271]}}	[u'AF-P0A9X4-F1-model_v2_&_NOBFS_0']	347	1	1	1
AF-P0A9X9-F1-model_v2_&_NOBFS_0	ALPHAFOLD	{u'b3556': 1}	87.9554	{u'b3556': {u'A': [True, 87.95542857142857]}}	[u'AF-P0A9X9-F1-model_v2_&_NOBFS_0']	70	1	1	1
AF-P0A9Y6-F1-model_v2_&_NOBFS_0	ALPHAFOLD	{u'b1823': 1}	90.1051	{u'b1823': {u'A': [True, 90.10507246376811]}}	[u'AF-P0A9Y6-F1-model_v2_&_NOBFS_0']	69	1	1	1
AF-P0A9Z1-F1-model_v2_&_NOBFS_0	ALPHAFOLD	{u'b2553': 1}	93.9546	{u'b2553': {u'A': [True, 93.95464285714287]}}	[u'AF-P0A9Z1-F1-model_v2_&_NOBFS_0']	112	1	1	1
AF-P0AA04-F1-model_v2_&_NOBFS_0	ALPHAFOLD	{u'b2415': 1}	96.9305	{u'b2415': {u'A': [True, 96.9304705882353]}}	[u'AF-P0AA04-F1-model_v2_&_NOBFS_0']	85	1	1	1
AF-P0AA10-F1-model_v2_&_NOBFS_0	ALPHAFOLD	{u'b3231': 1}	94.0266	{u'b3231': {u'A': [True, 94.02661971830987]}}	[u'AF-P0AA10-F1-model_v2_&_NOBFS_0']	142	1	1	1
AF-P0AA16-F1-model_v2_&_NOBFS_0	ALPHAFOLD	{u'b3405': 1}	86.1069	{u'b3405': {u'A': [True, 86.1068619246862]}}	[u'AF-P0AA16-F1-model_v2_&_NOBFS_0']	239	1	1	1
AF-P0AA25-F1-model_v2_&_NOBFS_0	ALPHAFOLD	{u'b3781': 1}	95.3076	{u'b3781': {u'A': [True, 95.30761467889907]}}	[u'AF-P0AA25-F1-model_v2_&_NOBFS_0']	109	1	1	1
AF-P0AA31-F1-model_v2_&_NOBFS_0	ALPHAFOLD	{u'b1930': 1}	86.894	{u'b1930': {u'A': [True, 86.894025974026]}}	[u'AF-P0AA31-F1-model_v2_&_NOBFS_0']	77	1	1	1
AF-P0AA37-F1-model_v2_&_NOBFS_0	ALPHAFOLD	{u'b0058': 1}	96.8544	{u'b0058': {u'A': [True, 96.85442922374428]}}	[u'AF-P0AA37-F1-model_v2_&_NOBFS_0']	219	1	1	1
AF-P0AA39-F1-model_v2_&_NOBFS_0	ALPHAFOLD	{u'b1086': 1}	91.3227	{u'b1086': {u'A': [True, 91.3226959247649]}}	[u'AF-P0AA39-F1-model_v2_&_NOBFS_0']	319	1	1	1
AF-P0AA41-F1-model_v2_&_NOBFS_0	ALPHAFOLD	{u'b2791': 1}	90.011	{u'b2791': {u'A': [True, 90.011]}}	[u'AF-P0AA41-F1-model_v2_&_NOBFS_0']	260	1	1	1
AF-P0AA43-F1-model_v2_&_NOBFS_0	ALPHAFOLD	{u'b2183': 1}	95.7546	{u'b2183': {u'A': [True, 95.75458874458873]}}	[u'AF-P0AA43-F1-model_v2_&_NOBFS_0']	231	1	1	1
AF-P0AA47-F1-model_v2_&_NOBFS_0	ALPHAFOLD	{u'b2014': 1}	85.7727	{u'b2014': {u'A': [True, 85.77267699115045]}}	[u'AF-P0AA47-F1-model_v2_&_NOBFS_0']	452	1	1	1
AF-P0AA49-F1-model_v2_&_NOBFS_0	ALPHAFOLD	{u'b2372': 1}	84.1871	{u'b2372': {u'A': [True, 84.18713375796179]}}	[u'AF-P0AA49-F1-model_v2_&_NOBFS_0']	314	1	1	1
AF-P0AA53-F1-model_v2_&_NOBFS_0	ALPHAFOLD	{u'b0489': 1}	87.295	{u'b0489': {u'A': [True, 87.29498360655738]}}	[u'AF-P0AA53-F1-model_v2_&_NOBFS_0']	305	1	1	1
AF-P0AA57-F1-model_v2_&_NOBFS_0	ALPHAFOLD	{u'b1841': 1}	90.727	{u'b1841': {u'A': [True, 90.72701612903225]}}	[u'AF-P0AA57-F1-model_v2_&_NOBFS_0']	124	1	1	1
AF-P0AA60-F1-model_v2_&_NOBFS_0	ALPHAFOLD	{u'b3009': 1}	74.1694	{u'b3009': {u'A': [True, 74.16936073059361]}}	[u'AF-P0AA60-F1-model_v2_&_NOBFS_0']	219	1	1	1
AF-P0AA63-F1-model_v2_&_NOBFS_0	ALPHAFOLD	{u'b3095': 1}	74.724	{u'b3095': {u'A': [True, 74.72404545454546]}}	[u'AF-P0AA63-F1-model_v2_&_NOBFS_0']	220	1	1	1
AF-P0AA67-F1-model_v2_&_NOBFS_0	ALPHAFOLD	{u'b0813': 1}	80.5384	{u'b0813': {u'A': [True, 80.53837288135593]}}	[u'AF-P0AA67-F1-model_v2_&_NOBFS_0']	295	1	1	1
AF-P0AA70-F1-model_v2_&_NOBFS_0	ALPHAFOLD	{u'b1959': 1}	89.8228	{u'b1959': {u'A': [True, 89.82281045751634]}}	[u'AF-P0AA70-F1-model_v2_&_NOBFS_0']	306	1	1	1
AF-P0AA73-F1-model_v2_&_NOBFS_0	ALPHAFOLD	{u'b3184': 1}	89.635	{u'b3184': {u'A': [True, 89.635015576324]}}	[u'AF-P0AA73-F1-model_v2_&_NOBFS_0']	321	1	1	1
AF-P0AA76-F1-model_v2_&_NOBFS_0	ALPHAFOLD	{u'b3691': 1}	86.9939	{u'b3691': {u'A': [True, 86.99393023255814]}}	[u'AF-P0AA76-F1-model_v2_&_NOBFS_0']	430	1	1	1
AF-P0AA78-F1-model_v2_&_NOBFS_0	ALPHAFOLD	{u'b3093': 1}	85.52	{u'b3093': {u'A': [True, 85.52]}}	[u'AF-P0AA78-F1-model_v2_&_NOBFS_0']	432	1	1	1
AF-P0AA80-F1-model_v2_&_NOBFS_0	ALPHAFOLD	{u'b3127': 1}	88.0066	{u'b3127': {u'A': [True, 88.00664414414413]}}	[u'AF-P0AA80-F1-model_v2_&_NOBFS_0']	444	1	1	1
AF-P0AA82-F1-model_v2_&_NOBFS_0	ALPHAFOLD	{u'b0336': 1}	90.7501	{u'b0336': {u'A': [True, 90.75007159904534]}}	[u'AF-P0AA82-F1-model_v2_&_NOBFS_0']	419	1	1	1
AF-P0AA84-F1-model_v2_&_NOBFS_0	ALPHAFOLD	{u'b0789': 1}	86.7314	{u'b0789': {u'A': [True, 86.7313559322034]}}	[u'AF-P0AA84-F1-model_v2_&_NOBFS_0']	413	1	1	1
AF-P0AA86-F1-model_v2_&_NOBFS_0	ALPHAFOLD	{u'b2195': 1}	92.5174	{u'b2195': {u'A': [True, 92.51740540540541]}}	[u'AF-P0AA86-F1-model_v2_&_NOBFS_0']	185	1	1	1
AF-P0AA89-F1-model_v2_&_NOBFS_0	ALPHAFOLD	{u'b1490': 1}	88.6444	{u'b1490': {u'A': [True, 88.6443695652174]}}	[u'AF-P0AA89-F1-model_v2_&_NOBFS_0']	460	1	1	1
AF-P0AA91-F1-model_v2_&_NOBFS_0	ALPHAFOLD	{u'b1806': 1}	79.6592	{u'b1806': {u'A': [True, 79.65922279792746]}}	[u'AF-P0AA91-F1-model_v2_&_NOBFS_0']	193	1	1	1
AF-P0AA93-F1-model_v2_&_NOBFS_0	ALPHAFOLD	{u'b2380': 1}	87.6642	{u'b2380': {u'A': [True, 87.66417699115043]}}	[u'AF-P0AA93-F1-model_v2_&_NOBFS_0']	565	1	1	1
AF-P0AA95-F1-model_v2_&_NOBFS_0	ALPHAFOLD	{u'b0122': 1}	88.6321	{u'b0122': {u'A': [True, 88.63208695652175]}}	[u'AF-P0AA95-F1-model_v2_&_NOBFS_0']	115	1	1	1
AF-P0AA97-F1-model_v2_&_NOBFS_0	ALPHAFOLD	{u'b0190': 1}	95.4611	{u'b0190': {u'A': [True, 95.46110497237568]}}	[u'AF-P0AA97-F1-model_v2_&_NOBFS_0']	181	1	1	1
AF-P0AA99-F1-model_v2_&_NOBFS_0	ALPHAFOLD	{u'b0224': 1}	87.2656	{u'b0224': {u'A': [True, 87.26556910569106]}}	[u'AF-P0AA99-F1-model_v2_&_NOBFS_0']	246	1	1	1
AF-P0AAA1-F1-model_v2_&_NOBFS_0	ALPHAFOLD	{u'b0287': 1}	93.9428	{u'b0287': {u'A': [True, 93.94279411764707]}}	[u'AF-P0AAA1-F1-model_v2_&_NOBFS_0']	204	1	1	1
AF-P0AAA3-F1-model_v2_&_NOBFS_0	ALPHAFOLD	{u'b0293': 1}	89.3222	{u'b0293': {u'A': [True, 89.32215384615384]}}	[u'AF-P0AAA3-F1-model_v2_&_NOBFS_0']	195	1	1	1
AF-P0AAA5-F1-model_v2_&_NOBFS_0	ALPHAFOLD	{u'b0991': 1}	62.4172	{u'b0991': {u'A': [True, 62.417236842105254]}}	[u'AF-P0AAA5-F1-model_v2_&_NOBFS_0']	76	1	1	1
AF-P0AAA7-F1-model_v2_&_NOBFS_0	ALPHAFOLD	{u'b3792': 1}	80.7404	{u'b3792': {u'A': [True, 80.7404326923077]}}	[u'AF-P0AAA7-F1-model_v2_&_NOBFS_0']	416	1	1	1
AF-P0AAA9-F1-model_v2_&_NOBFS_0	ALPHAFOLD	{u'b4002': 1}	73.0533	{u'b4002': {u'A': [True, 73.05326241134752]}}	[u'AF-P0AAA9-F1-model_v2_&_NOBFS_0']	141	1	1	1
AF-P0AAB2-F1-model_v2_&_NOBFS_0	ALPHAFOLD	{u'b2061': 1}	95.6031	{u'b2061': {u'A': [True, 95.6030612244898]}}	[u'AF-P0AAB2-F1-model_v2_&_NOBFS_0']	147	1	1	1
AF-P0AAB4-F1-model_v2_&_NOBFS_0	ALPHAFOLD	{u'b3843': 1}	92.4624	{u'b3843': {u'A': [True, 92.46239436619717]}}	[u'AF-P0AAB4-F1-model_v2_&_NOBFS_0']	497	1	1	1
AF-P0AAB6-F1-model_v2_&_NOBFS_0	ALPHAFOLD	{u'b2042': 1}	94.588	{u'b2042': {u'A': [True, 94.58801346801347]}}	[u'AF-P0AAB6-F1-model_v2_&_NOBFS_0']	297	1	1	1
AF-P0AAB8-F1-model_v2_&_NOBFS_0	ALPHAFOLD	{u'b3923': 1}	84.0002	{u'b3923': {u'A': [True, 84.00021126760562]}}	[u'AF-P0AAB8-F1-model_v2_&_NOBFS_0']	142	1	1	1
AF-P0AAC0-F1-model_v2_&_NOBFS_0	ALPHAFOLD	{u'b1333': 1}	89.3603	{u'b1333': {u'A': [True, 89.36028481012657]}}	[u'AF-P0AAC0-F1-model_v2_&_NOBFS_0']	316	1	1	1
AF-P0AAC4-F1-model_v2_&_NOBFS_0	ALPHAFOLD	{u'b0786': 1}	91.2585	{u'b0786': {u'A': [True, 91.25850427350426]}}	[u'AF-P0AAC4-F1-model_v2_&_NOBFS_0']	234	1	1	1
AF-P0AAC6-F1-model_v2_&_NOBFS_0	ALPHAFOLD	{u'b0970': 1}	85.9599	{u'b0970': {u'A': [True, 85.9599086757991]}}	[u'AF-P0AAC6-F1-model_v2_&_NOBFS_0']	219	1	1	1
AF-P0AAC8-F1-model_v2_&_NOBFS_0	ALPHAFOLD	{u'b2528': 1}	93.9803	{u'b2528': {u'A': [True, 93.98028037383177]}}	[u'AF-P0AAC8-F1-model_v2_&_NOBFS_0']	107	1	1	1
AF-P0AAD2-F1-model_v2_&_NOBFS_0	ALPHAFOLD	{u'b3161': 1}	89.1989	{u'b3161': {u'A': [True, 89.19891304347827]}}	[u'AF-P0AAD2-F1-model_v2_&_NOBFS_0']	414	1	1	1
AF-P0AAD4-F1-model_v2_&_NOBFS_0	ALPHAFOLD	{u'b1907': 1}	91.2759	{u'b1907': {u'A': [True, 91.27585607940446]}}	[u'AF-P0AAD4-F1-model_v2_&_NOBFS_0']	403	1	1	1
AF-P0AAD6-F1-model_v2_&_NOBFS_0	ALPHAFOLD	{u'b2796': 1}	88.6656	{u'b2796': {u'A': [True, 88.6655710955711]}}	[u'AF-P0AAD6-F1-model_v2_&_NOBFS_0']	429	1	1	1
AF-P0AAD8-F1-model_v2_&_NOBFS_0	ALPHAFOLD	{u'b3116': 1}	87.282	{u'b3116': {u'A': [True, 87.28200902934537]}}	[u'AF-P0AAD8-F1-model_v2_&_NOBFS_0']	443	1	1	1
AF-P0AAE0-F1-model_v2_&_NOBFS_0	ALPHAFOLD	{u'b4208': 1}	85.9501	{u'b4208': {u'A': [True, 85.95010638297873]}}	[u'AF-P0AAE0-F1-model_v2_&_NOBFS_0']	470	1	1	1
AF-P0AAE2-F1-model_v2_&_NOBFS_0	ALPHAFOLD	{u'b0402': 1}	86.1777	{u'b0402': {u'A': [True, 86.17772428884027]}}	[u'AF-P0AAE2-F1-model_v2_&_NOBFS_0']	457	1	1	1
AF-P0AAE5-F1-model_v2_&_NOBFS_0	ALPHAFOLD	{u'b1605': 1}	89.0404	{u'b1605': {u'A': [True, 89.04039130434784]}}	[u'AF-P0AAE5-F1-model_v2_&_NOBFS_0']	460	1	1	1
AF-P0AAE8-F1-model_v2_&_NOBFS_0	ALPHAFOLD	{u'b4132': 1}	91.4529	{u'b4132': {u'A': [True, 91.45288288288289]}}	[u'AF-P0AAE8-F1-model_v2_&_NOBFS_0']	444	1	1	1
AF-P0AAF1-F1-model_v2_&_NOBFS_0	ALPHAFOLD	{u'b0692': 1}	91.1006	{u'b0692': {u'A': [True, 91.10056947608199]}}	[u'AF-P0AAF1-F1-model_v2_&_NOBFS_0']	439	1	1	1
AF-P0AAF3-F1-model_v2_&_NOBFS_0	ALPHAFOLD	{u'b1900': 1}	89.1596	{u'b1900': {u'A': [True, 89.15960317460318]}}	[u'AF-P0AAF3-F1-model_v2_&_NOBFS_0']	504	1	1	1
AF-P0AAF6-F1-model_v2_&_NOBFS_0	ALPHAFOLD	{u'b0864': 1}	95.3521	{u'b0864': {u'A': [True, 95.35210743801653]}}	[u'AF-P0AAF6-F1-model_v2_&_NOBFS_0']	242	1	1	1
AF-P0AAG0-F1-model_v2_&_NOBFS_0	ALPHAFOLD	{u'b3541': 1}	92.7782	{u'b3541': {u'A': [True, 92.77819571865444]}}	[u'AF-P0AAG0-F1-model_v2_&_NOBFS_0']	327	1	1	1
AF-P0AAG3-F1-model_v2_&_NOBFS_0	ALPHAFOLD	{u'b0652': 1}	95.8819	{u'b0652': {u'A': [True, 95.88190871369295]}}	[u'AF-P0AAG3-F1-model_v2_&_NOBFS_0']	241	1	1	1
AF-P0AAG5-F1-model_v2_&_NOBFS_0	ALPHAFOLD	{u'b0449': 1}	89.3378	{u'b0449': {u'A': [True, 89.33775716694772]}}	[u'AF-P0AAG5-F1-model_v2_&_NOBFS_0']	593	1	1	1
AF-P0AAG8-F1-model_v2_&_NOBFS_0	ALPHAFOLD	{u'b2149': 1}	90.006	{u'b2149': {u'A': [True, 90.00596837944663]}}	[u'AF-P0AAG8-F1-model_v2_&_NOBFS_0']	506	1	1	1
AF-P0AAH0-F1-model_v2_&_NOBFS_0	ALPHAFOLD	{u'b3725': 1}	93.7483	{u'b3725': {u'A': [True, 93.74828793774319]}}	[u'AF-P0AAH0-F1-model_v2_&_NOBFS_0']	257	1	1	1
AF-P0AAH4-F1-model_v2_&_NOBFS_0	ALPHAFOLD	{u'b1291': 1}	92.4158	{u'b1291': {u'A': [True, 92.41575757575758]}}	[u'AF-P0AAH4-F1-model_v2_&_NOBFS_0']	330	1	1	1
AF-P0AAH8-F1-model_v2_&_NOBFS_0	ALPHAFOLD	{u'b1290': 1}	90.2291	{u'b1290': {u'A': [True, 90.22914179104478]}}	[u'AF-P0AAH8-F1-model_v2_&_NOBFS_0']	268	1	1	1
AF-P0AAI1-F1-model_v2_&_NOBFS_0	ALPHAFOLD	{u'b0933': 1}	90.7615	{u'b0933': {u'A': [True, 90.76145098039215]}}	[u'AF-P0AAI1-F1-model_v2_&_NOBFS_0']	255	1	1	1
AF-P0AAI3-F1-model_v2_&_NOBFS_0	ALPHAFOLD	{u'b3178': 1}	82.1258	{u'b3178': {u'A': [True, 82.12582298136645]}}	[u'AF-P0AAI3-F1-model_v2_&_NOBFS_0']	644	1	1	1
AF-P0AAI5-F1-model_v2_&_NOBFS_0	ALPHAFOLD	{u'b1095': 1}	97.9626	{u'b1095': {u'A': [True, 97.96256658595642]}}	[u'AF-P0AAI5-F1-model_v2_&_NOBFS_0']	413	1	1	1
AF-P0AAI9-F1-model_v2_&_NOBFS_0	ALPHAFOLD	{u'b1092': 1}	97.5222	{u'b1092': {u'A': [True, 97.52216828478966]}}	[u'AF-P0AAI9-F1-model_v2_&_NOBFS_0']	309	1	1	1
AF-P0AAJ1-F1-model_v2_&_NOBFS_0	ALPHAFOLD	{u'b1589': 1}	96.9214	{u'b1589': {u'A': [True, 96.92141463414634]}}	[u'AF-P0AAJ1-F1-model_v2_&_NOBFS_0']	205	1	1	1
AF-P0AAJ3-F1-model_v2_&_NOBFS_0	ALPHAFOLD	{u'b1475': 1}	92.7858	{u'b1475': {u'A': [True, 92.78578231292516]}}	[u'AF-P0AAJ3-F1-model_v2_&_NOBFS_0']	294	1	1	1
AF-P0AAJ5-F1-model_v2_&_NOBFS_0	ALPHAFOLD	{u'b3893': 1}	95.1374	{u'b3893': {u'A': [True, 95.13736666666667]}}	[u'AF-P0AAJ5-F1-model_v2_&_NOBFS_0']	300	1	1	1
AF-P0AAJ8-F1-model_v2_&_NOBFS_0	ALPHAFOLD	{u'b2996': 1}	89.365	{u'b2996': {u'A': [True, 89.36503048780487]}}	[u'AF-P0AAJ8-F1-model_v2_&_NOBFS_0']	328	1	1	1
AF-P0AAK1-F1-model_v2_&_NOBFS_0	ALPHAFOLD	{u'b2724': 1}	86.7759	{u'b2724': {u'A': [True, 86.77586206896552]}}	[u'AF-P0AAK1-F1-model_v2_&_NOBFS_0']	203	1	1	1
AF-P0AAK4-F1-model_v2_&_NOBFS_0	ALPHAFOLD	{u'b2713': 1}	93.8099	{u'b2713': {u'A': [True, 93.80988571428571]}}	[u'AF-P0AAK4-F1-model_v2_&_NOBFS_0']	175	1	1	1
AF-P0AAK7-F1-model_v2_&_NOBFS_0	ALPHAFOLD	{u'b4072': 1}	88.85	{u'b4072': {u'A': [True, 88.85004484304932]}}	[u'AF-P0AAK7-F1-model_v2_&_NOBFS_0']	223	1	1	1
AF-P0AAL0-F1-model_v2_&_NOBFS_0	ALPHAFOLD	{u'b2208': 1}	89.5572	{u'b2208': {u'A': [True, 89.55719512195122]}}	[u'AF-P0AAL0-F1-model_v2_&_NOBFS_0']	164	1	1	1
AF-P0AAL3-F1-model_v2_&_NOBFS_0	ALPHAFOLD	{u'b2205': 1}	89.837	{u'b2205': {u'A': [True, 89.83701298701298]}}	[u'AF-P0AAL3-F1-model_v2_&_NOBFS_0']	231	1	1	1
AF-P0AAL6-F1-model_v2_&_NOBFS_0	ALPHAFOLD	{u'b1674': 1}	85.0138	{u'b1674': {u'A': [True, 85.01379807692307]}}	[u'AF-P0AAL6-F1-model_v2_&_NOBFS_0']	208	1	1	1
AF-P0AAL9-F1-model_v2_&_NOBFS_0	ALPHAFOLD	{u'b0288': 1}	93.1747	{u'b0288': {u'A': [True, 93.17467889908258]}}	[u'AF-P0AAL9-F1-model_v2_&_NOBFS_0']	109	1	1	1
AF-P0AAM1-F1-model_v2_&_NOBFS_0	ALPHAFOLD	{u'b0974': 1}	76.4192	{u'b0974': {u'A': [True, 76.41923404255317]}}	[u'AF-P0AAM1-F1-model_v2_&_NOBFS_0']	235	1	1	1
AF-P0AAM3-F1-model_v2_&_NOBFS_0	ALPHAFOLD	{u'b2728': 1}	86.6414	{u'b2728': {u'A': [True, 86.64144444444445]}}	[u'AF-P0AAM3-F1-model_v2_&_NOBFS_0']	90	1	1	1
AF-P0AAM7-F1-model_v2_&_NOBFS_0	ALPHAFOLD	{u'b2990': 1}	90.1034	{u'b2990': {u'A': [True, 90.10341463414635]}}	[u'AF-P0AAM7-F1-model_v2_&_NOBFS_0']	82	1	1	1
AF-P0AAN1-F1-model_v2_&_NOBFS_0	ALPHAFOLD	{u'b2992': 1}	73.8021	{u'b2992': {u'A': [True, 73.80209876543209]}}	[u'AF-P0AAN1-F1-model_v2_&_NOBFS_0']	162	1	1	1
AF-P0AAN3-F1-model_v2_&_NOBFS_0	ALPHAFOLD	{u'b2727': 1}	89.1119	{u'b2727': {u'A': [True, 89.11186206896551]}}	[u'AF-P0AAN3-F1-model_v2_&_NOBFS_0']	290	1	1	1
AF-P0AAN5-F1-model_v2_&_NOBFS_0	ALPHAFOLD	{u'b0389': 1}	84.6267	{u'b0389': {u'A': [True, 84.62666666666667]}}	[u'AF-P0AAN5-F1-model_v2_&_NOBFS_0']	63	1	1	1
AF-P0AAN9-F1-model_v2_&_NOBFS_0	ALPHAFOLD	{u'b0382': 1}	88.0406	{u'b0382': {u'A': [True, 88.04058139534882]}}	[u'AF-P0AAN9-F1-model_v2_&_NOBFS_0']	86	1	1	1
AF-P0AAP1-F1-model_v2_&_NOBFS_0	ALPHAFOLD	{u'b0385': 1}	89.9987	{u'b0385': {u'A': [True, 89.99867924528303]}}	[u'AF-P0AAP1-F1-model_v2_&_NOBFS_0']	371	1	1	1
AF-P0AAP3-F1-model_v2_&_NOBFS_0	ALPHAFOLD	{u'b0357': 1}	88.6978	{u'b0357': {u'A': [True, 88.6978021978022]}}	[u'AF-P0AAP3-F1-model_v2_&_NOBFS_0']	91	1	1	1
AF-P0AAP5-F1-model_v2_&_NOBFS_0	ALPHAFOLD	{u'b0375': 1}	93.5575	{u'b0375': {u'A': [True, 93.55753623188406]}}	[u'AF-P0AAP5-F1-model_v2_&_NOBFS_0']	207	1	1	1
AF-P0AAP7-F1-model_v2_&_NOBFS_0	ALPHAFOLD	{u'b0379': 1}	66.4817	{u'b0379': {u'A': [True, 66.48166666666667]}}	[u'AF-P0AAP7-F1-model_v2_&_NOBFS_0']	102	1	1	1
AF-P0AAQ0-F1-model_v2_&_NOBFS_0	ALPHAFOLD	{u'b0380': 1}	79.3257	{u'b0380': {u'A': [True, 79.3257142857143]}}	[u'AF-P0AAQ0-F1-model_v2_&_NOBFS_0']	70	1	1	1
AF-P0AAQ2-F1-model_v2_&_NOBFS_0	ALPHAFOLD	{u'b0410': 1}	84.9564	{u'b0410': {u'A': [True, 84.9564347826087]}}	[u'AF-P0AAQ2-F1-model_v2_&_NOBFS_0']	115	1	1	1
AF-P0AAQ6-F1-model_v2_&_NOBFS_0	ALPHAFOLD	{u'b0456': 1}	95.2556	{u'b0456': {u'A': [True, 95.25555555555555]}}	[u'AF-P0AAQ6-F1-model_v2_&_NOBFS_0']	117	1	1	1
AF-P0AAR0-F1-model_v2_&_NOBFS_0	ALPHAFOLD	{u'b0461': 1}	88.2197	{u'b0461': {u'A': [True, 88.21967741935484]}}	[u'AF-P0AAR0-F1-model_v2_&_NOBFS_0']	124	1	1	1
AF-P0AAR3-F1-model_v2_&_NOBFS_0	ALPHAFOLD	{u'b0481': 1}	97.1862	{u'b0481': {u'A': [True, 97.18622641509432]}}	[u'AF-P0AAR3-F1-model_v2_&_NOBFS_0']	159	1	1	1
AF-P0AAR5-F1-model_v2_&_NOBFS_0	ALPHAFOLD	{u'b0468': 1}	75.4806	{u'b0468': {u'A': [True, 75.48056]}}	[u'AF-P0AAR5-F1-model_v2_&_NOBFS_0']	125	1	1	1
AF-P0AAR8-F1-model_v2_&_NOBFS_0	ALPHAFOLD	{u'b0442': 1}	74.1385	{u'b0442': {u'A': [True, 74.13845528455286]}}	[u'AF-P0AAR8-F1-model_v2_&_NOBFS_0']	123	1	1	1
AF-P0AAS0-F1-model_v2_&_NOBFS_0	ALPHAFOLD	{u'b0458': 1}	88.0987	{u'b0458': {u'A': [True, 88.09871794871796]}}	[u'AF-P0AAS0-F1-model_v2_&_NOBFS_0']	156	1	1	1
AF-P0AAS3-F1-model_v2_&_NOBFS_0	ALPHAFOLD	{u'b0488': 1}	82.9296	{u'b0488': {u'A': [True, 82.9296052631579]}}	[u'AF-P0AAS3-F1-model_v2_&_NOBFS_0']	152	1	1	1
AF-P0AAS5-F1-model_v2_&_NOBFS_0	ALPHAFOLD	{u'b0520': 1}	95.4438	{u'b0520': {u'A': [True, 95.44380073800738]}}	[u'AF-P0AAS5-F1-model_v2_&_NOBFS_0']	271	1	1	1
AF-P0AAS7-F1-model_v2_&_NOBFS_0	ALPHAFOLD	{u'b0528': 1}	90.5593	{u'b0528': {u'A': [True, 90.5592857142857]}}	[u'AF-P0AAS7-F1-model_v2_&_NOBFS_0']	70	1	1	1
AF-P0AAS9-F1-model_v2_&_NOBFS_0	ALPHAFOLD	{u'b4512': 1}	80.6355	{u'b4512': {u'A': [True, 80.63553846153846]}}	[u'AF-P0AAS9-F1-model_v2_&_NOBFS_0']	65	1	1	1
AF-P0AAT2-F1-model_v2_&_NOBFS_0	ALPHAFOLD	{u'b0579': 1}	96.4856	{u'b0579': {u'A': [True, 96.48557377049181]}}	[u'AF-P0AAT2-F1-model_v2_&_NOBFS_0']	122	1	1	1
AF-P0AAT4-F1-model_v2_&_NOBFS_0	ALPHAFOLD	{u'b0577': 1}	89.292	{u'b0577': {u'A': [True, 89.29197590361446]}}	[u'AF-P0AAT4-F1-model_v2_&_NOBFS_0']	415	1	1	1
AF-P0AAT6-F1-model_v2_&_NOBFS_0	ALPHAFOLD	{u'b0637': 1}	94.4037	{u'b0637': {u'A': [True, 94.4037142857143]}}	[u'AF-P0AAT6-F1-model_v2_&_NOBFS_0']	105	1	1	1
AF-P0AAT9-F1-model_v2_&_NOBFS_0	ALPHAFOLD	{u'b0643': 1}	87.4147	{u'b0643': {u'A': [True, 87.41475]}}	[u'AF-P0AAT9-F1-model_v2_&_NOBFS_0']	160	1	1	1
AF-P0AAU2-F1-model_v2_&_NOBFS_0	ALPHAFOLD	{u'b0699': 1}	76.6624	{u'b0699': {u'A': [True, 76.66235294117647]}}	[u'AF-P0AAU2-F1-model_v2_&_NOBFS_0']	68	1	1	1
AF-P0AAU5-F1-model_v2_&_NOBFS_0	ALPHAFOLD	{u'b0702': 1}	89.0032	{u'b0702': {u'A': [True, 89.00324074074075]}}	[u'AF-P0AAU5-F1-model_v2_&_NOBFS_0']	108	1	1	1
AF-P0AAU7-F1-model_v2_&_NOBFS_0	ALPHAFOLD	{u'b0685': 1}	83.927	{u'b0685': {u'A': [True, 83.92701030927834]}}	[u'AF-P0AAU7-F1-model_v2_&_NOBFS_0']	97	1	1	1
AF-P0AAV0-F1-model_v2_&_NOBFS_0	ALPHAFOLD	{u'b0735': 1}	89.8478	{u'b0735': {u'A': [True, 89.84783505154638]}}	[u'AF-P0AAV0-F1-model_v2_&_NOBFS_0']	97	1	1	1
AF-P0AAV4-F1-model_v2_&_NOBFS_0	ALPHAFOLD	{u'b0711': 1}	93.2478	{u'b0711': {u'A': [True, 93.24784403669724]}}	[u'AF-P0AAV4-F1-model_v2_&_NOBFS_0']	218	1	1	1
AF-P0AAV6-F1-model_v2_&_NOBFS_0	ALPHAFOLD	{u'b0753': 1}	60.0213	{u'b0753': {u'A': [True, 60.02134920634922]}}	[u'AF-P0AAV6-F1-model_v2_&_NOBFS_0']	126	1	1	1
AF-P0AAV8-F1-model_v2_&_NOBFS_0	ALPHAFOLD	{u'b0769': 1}	95.2642	{u'b0769': {u'A': [True, 95.26422857142856]}}	[u'AF-P0AAV8-F1-model_v2_&_NOBFS_0']	350	1	1	1
AF-P0AAW1-F1-model_v2_&_NOBFS_0	ALPHAFOLD	{u'b0790': 1}	91.2903	{u'b0790': {u'A': [True, 91.29031620553359]}}	[u'AF-P0AAW1-F1-model_v2_&_NOBFS_0']	253	1	1	1
AF-P0AAW5-F1-model_v2_&_NOBFS_0	ALPHAFOLD	{u'b0791': 1}	61.8636	{u'b0791': {u'A': [True, 61.863602941176474]}}	[u'AF-P0AAW5-F1-model_v2_&_NOBFS_0']	136	1	1	1
AF-P0AAW9-F1-model_v2_&_NOBFS_0	ALPHAFOLD	{u'b0762': 1}	88.1845	{u'b0762': {u'A': [True, 88.18448979591837]}}	[u'AF-P0AAW9-F1-model_v2_&_NOBFS_0']	49	1	1	1
AF-P0AAX3-F1-model_v2_&_NOBFS_0	ALPHAFOLD	{u'b0802': 1}	77.5871	{u'b0802': {u'A': [True, 77.58709302325582]}}	[u'AF-P0AAX3-F1-model_v2_&_NOBFS_0']	86	1	1	1
AF-P0AAX6-F1-model_v2_&_NOBFS_0	ALPHAFOLD	{u'b0806': 1}	77.3216	{u'b0806': {u'A': [True, 77.32162790697674]}}	[u'AF-P0AAX6-F1-model_v2_&_NOBFS_0']	86	1	1	1
AF-P0AAX8-F1-model_v2_&_NOBFS_0	ALPHAFOLD	{u'b0819': 1}	91.6828	{u'b0819': {u'A': [True, 91.68281045751635]}}	[u'AF-P0AAX8-F1-model_v2_&_NOBFS_0']	306	1	1	1
AF-P0AAY1-F1-model_v2_&_NOBFS_0	ALPHAFOLD	{u'b0836': 1}	86.2209	{u'b0836': {u'A': [True, 86.22094488188976]}}	[u'AF-P0AAY1-F1-model_v2_&_NOBFS_0']	127	1	1	1
AF-P0AAY4-F1-model_v2_&_NOBFS_0	ALPHAFOLD	{u'b0843': 1}	66.6977	{u'b0843': {u'A': [True, 66.69765957446808]}}	[u'AF-P0AAY4-F1-model_v2_&_NOBFS_0']	94	1	1	1
AF-P0AAY6-F1-model_v2_&_NOBFS_0	ALPHAFOLD	{u'b0853': 1}	91.0294	{u'b0853': {u'A': [True, 91.02936708860759]}}	[u'AF-P0AAY6-F1-model_v2_&_NOBFS_0']	158	1	1	1
AF-P0AAZ0-F1-model_v2_&_NOBFS_0	ALPHAFOLD	{u'b0858': 1}	79.8248	{u'b0858': {u'A': [True, 79.82481481481481]}}	[u'AF-P0AAZ0-F1-model_v2_&_NOBFS_0']	162	1	1	1
AF-P0AAZ4-F1-model_v2_&_NOBFS_0	ALPHAFOLD	{u'b0892': 1}	89.957	{u'b0892': {u'A': [True, 89.95695749440715]}}	[u'AF-P0AAZ4-F1-model_v2_&_NOBFS_0']	447	1	1	1
AF-P0AAZ7-F1-model_v2_&_NOBFS_0	ALPHAFOLD	{u'b0917': 1}	83.3175	{u'b0917': {u'A': [True, 83.31749999999998]}}	[u'AF-P0AAZ7-F1-model_v2_&_NOBFS_0']	60	1	1	1
AF-P0AB01-F1-model_v2_&_NOBFS_0	ALPHAFOLD	{u'b0920': 1}	93.7901	{u'b0920': {u'A': [True, 93.79007722007722]}}	[u'AF-P0AB01-F1-model_v2_&_NOBFS_0']	259	1	1	1
AF-P0AB03-F1-model_v2_&_NOBFS_0	ALPHAFOLD	{u'b0919': 1}	94.8718	{u'b0919': {u'A': [True, 94.87178451178451]}}	[u'AF-P0AB03-F1-model_v2_&_NOBFS_0']	297	1	1	1
AF-P0AB06-F1-model_v2_&_NOBFS_0	ALPHAFOLD	{u'b0926': 1}	90.4395	{u'b0926': {u'A': [True, 90.43950549450548]}}	[u'AF-P0AB06-F1-model_v2_&_NOBFS_0']	182	1	1	1
AF-P0AB10-F1-model_v2_&_NOBFS_0	ALPHAFOLD	{u'b0952': 1}	89.3268	{u'b0952': {u'A': [True, 89.32679144385027]}}	[u'AF-P0AB10-F1-model_v2_&_NOBFS_0']	187	1	1	1
AF-P0AB12-F1-model_v2_&_NOBFS_0	ALPHAFOLD	{u'b0961': 1}	92.0178	{u'b0961': {u'A': [True, 92.01783783783783]}}	[u'AF-P0AB12-F1-model_v2_&_NOBFS_0']	148	1	1	1
AF-P0AB14-F1-model_v2_&_NOBFS_0	ALPHAFOLD	{u'b1003': 1}	93.0104	{u'b1003': {u'A': [True, 93.01039999999999]}}	[u'AF-P0AB14-F1-model_v2_&_NOBFS_0']	75	1	1	1
AF-P0AB18-F1-model_v2_&_NOBFS_0	ALPHAFOLD	{u'b0969': 1}	94.6783	{u'b0969': {u'A': [True, 94.67834862385324]}}	[u'AF-P0AB18-F1-model_v2_&_NOBFS_0']	109	1	1	1
AF-P0AB20-F1-model_v2_&_NOBFS_0	ALPHAFOLD	{u'b0966': 1}	89.4715	{u'b0966': {u'A': [True, 89.47152380952382]}}	[u'AF-P0AB20-F1-model_v2_&_NOBFS_0']	105	1	1	1
AF-P0AB24-F1-model_v2_&_NOBFS_0	ALPHAFOLD	{u'b1018': 1}	91.9025	{u'b1018': {u'A': [True, 91.90253333333332]}}	[u'AF-P0AB24-F1-model_v2_&_NOBFS_0']	375	1	1	1
AF-P0AB26-F1-model_v2_&_NOBFS_0	ALPHAFOLD	{u'b1063': 1}	90.2825	{u'b1063': {u'A': [True, 90.28247311827957]}}	[u'AF-P0AB26-F1-model_v2_&_NOBFS_0']	186	1	1	1
AF-P0AB28-F1-model_v2_&_NOBFS_0	ALPHAFOLD	{u'b1088': 1}	90.9685	{u'b1088': {u'A': [True, 90.96849710982659]}}	[u'AF-P0AB28-F1-model_v2_&_NOBFS_0']	173	1	1	1
AF-P0AB31-F1-model_v2_&_NOBFS_0	ALPHAFOLD	{u'b1050': 1}	76.4568	{u'b1050': {u'A': [True, 76.45679999999999]}}	[u'AF-P0AB31-F1-model_v2_&_NOBFS_0']	75	1	1	1
AF-P0AB33-F1-model_v2_&_NOBFS_0	ALPHAFOLD	{u'b1060': 1}	78.5873	{u'b1060': {u'A': [True, 78.5872619047619]}}	[u'AF-P0AB33-F1-model_v2_&_NOBFS_0']	84	1	1	1
AF-P0AB35-F1-model_v2_&_NOBFS_0	ALPHAFOLD	{u'b1110': 1}	67.9652	{u'b1110': {u'A': [True, 67.96519553072626]}}	[u'AF-P0AB35-F1-model_v2_&_NOBFS_0']	179	1	1	1
AF-P0AB38-F1-model_v2_&_NOBFS_0	ALPHAFOLD	{u'b1105': 1}	77.0471	{u'b1105': {u'A': [True, 77.04713615023475]}}	[u'AF-P0AB38-F1-model_v2_&_NOBFS_0']	213	1	1	1
AF-P0AB40-F1-model_v2_&_NOBFS_0	ALPHAFOLD	{u'b1112': 1}	73.8309	{u'b1112': {u'A': [True, 73.83094117647057]}}	[u'AF-P0AB40-F1-model_v2_&_NOBFS_0']	85	1	1	1
AF-P0AB43-F1-model_v2_&_NOBFS_0	ALPHAFOLD	{u'b1179': 1}	75.7061	{u'b1179': {u'A': [True, 75.7061111111111]}}	[u'AF-P0AB43-F1-model_v2_&_NOBFS_0']	108	1	1	1
AF-P0AB46-F1-model_v2_&_NOBFS_0	ALPHAFOLD	{u'b1171': 1}	65.2521	{u'b1171': {u'A': [True, 65.25211009174312]}}	[u'AF-P0AB46-F1-model_v2_&_NOBFS_0']	109	1	1	1
AF-P0AB49-F1-model_v2_&_NOBFS_0	ALPHAFOLD	{u'b1205': 1}	73.421	{u'b1205': {u'A': [True, 73.42097826086957]}}	[u'AF-P0AB49-F1-model_v2_&_NOBFS_0']	92	1	1	1
AF-P0AB52-F1-model_v2_&_NOBFS_0	ALPHAFOLD	{u'b1219': 1}	97.3708	{u'b1219': {u'A': [True, 97.37076923076924]}}	[u'AF-P0AB52-F1-model_v2_&_NOBFS_0']	117	1	1	1
AF-P0AB55-F1-model_v2_&_NOBFS_0	ALPHAFOLD	{u'b1251': 1}	98.2257	{u'b1251': {u'A': [True, 98.22571428571428]}}	[u'AF-P0AB55-F1-model_v2_&_NOBFS_0']	98	1	1	1
AF-P0AB58-F1-model_v2_&_NOBFS_0	ALPHAFOLD	{u'b1280': 1}	93.689	{u'b1280': {u'A': [True, 93.68897172236503]}}	[u'AF-P0AB58-F1-model_v2_&_NOBFS_0']	389	1	1	1
AF-P0AB61-F1-model_v2_&_NOBFS_0	ALPHAFOLD	{u'b1273': 1}	88.3325	{u'b1273': {u'A': [True, 88.33253012048195]}}	[u'AF-P0AB61-F1-model_v2_&_NOBFS_0']	83	1	1	1
AF-P0AB65-F1-model_v2_&_NOBFS_0	ALPHAFOLD	{u'b0968': 1}	90.5396	{u'b0968': {u'A': [True, 90.53956521739131]}}	[u'AF-P0AB65-F1-model_v2_&_NOBFS_0']	92	1	1	1
AF-P0AB67-F1-model_v2_&_NOBFS_0	ALPHAFOLD	{u'b1602': 1}	90.2796	{u'b1602': {u'A': [True, 90.27963203463204]}}	[u'AF-P0AB67-F1-model_v2_&_NOBFS_0']	462	1	1	1
AF-P0AB71-F1-model_v2_&_NOBFS_0	ALPHAFOLD	{u'b2925': 1}	94.7484	{u'b2925': {u'A': [True, 94.74838440111421]}}	[u'AF-P0AB71-F1-model_v2_&_NOBFS_0']	359	1	1	1
AF-P0AB74-F1-model_v2_&_NOBFS_0	ALPHAFOLD	{u'b3137': 1}	95.9867	{u'b3137': {u'A': [True, 95.98667832167831]}}	[u'AF-P0AB74-F1-model_v2_&_NOBFS_0']	286	1	1	1
AF-P0AB77-F1-model_v2_&_NOBFS_0	ALPHAFOLD	{u'b3617': 1}	97.2501	{u'b3617': {u'A': [True, 97.25007537688442]}}	[u'AF-P0AB77-F1-model_v2_&_NOBFS_0']	398	1	1	1
AF-P0AB80-F1-model_v2_&_NOBFS_0	ALPHAFOLD	{u'b3770': 1}	95.7173	{u'b3770': {u'A': [True, 95.71734627831717]}}	[u'AF-P0AB80-F1-model_v2_&_NOBFS_0']	309	1	1	1
AF-P0AB83-F1-model_v2_&_NOBFS_0	ALPHAFOLD	{u'b1633': 1}	97.2253	{u'b1633': {u'A': [True, 97.2252606635071]}}	[u'AF-P0AB83-F1-model_v2_&_NOBFS_0']	211	1	1	1
AF-P0AB85-F1-model_v2_&_NOBFS_0	ALPHAFOLD	{u'b2214': 1}	90.6351	{u'b2214': {u'A': [True, 90.63507122507123]}}	[u'AF-P0AB85-F1-model_v2_&_NOBFS_0']	351	1	1	1
AF-P0AB87-F1-model_v2_&_NOBFS_0	ALPHAFOLD	{u'b2800': 1}	96.2435	{u'b2800': {u'A': [True, 96.24348837209301]}}	[u'AF-P0AB87-F1-model_v2_&_NOBFS_0']	215	1	1	1
AF-P0AB89-F1-model_v2_&_NOBFS_0	ALPHAFOLD	{u'b1131': 1}	96.9432	{u'b1131': {u'A': [True, 96.94322368421052]}}	[u'AF-P0AB89-F1-model_v2_&_NOBFS_0']	456	1	1	1
AF-P0AB91-F1-model_v2_&_NOBFS_0	ALPHAFOLD	{u'b0754': 1}	96.9901	{u'b0754': {u'A': [True, 96.99008571428571]}}	[u'AF-P0AB91-F1-model_v2_&_NOBFS_0']	350	1	1	1
AF-P0AB93-F1-model_v2_&_NOBFS_0	ALPHAFOLD	{u'b3502': 1}	94.0087	{u'b3502': {u'A': [True, 94.00869463869465]}}	[u'AF-P0AB93-F1-model_v2_&_NOBFS_0']	429	1	1	1
AF-P0AB96-F1-model_v2_&_NOBFS_0	ALPHAFOLD	{u'b3503': 1}	96.8615	{u'b3503': {u'A': [True, 96.86148936170214]}}	[u'AF-P0AB96-F1-model_v2_&_NOBFS_0']	141	1	1	1
AF-P0AB98-F1-model_v2_&_NOBFS_0	ALPHAFOLD	{u'b3738': 1}	57.0626	{u'b3738': {u'A': [True, 57.06258302583026]}}	[u'AF-P0AB98-F1-model_v2_&_NOBFS_0']	271	1	1	1
AF-P0ABA0-F1-model_v2_&_NOBFS_0	ALPHAFOLD	{u'b3736': 1}	90.6951	{u'b3736': {u'A': [True, 90.6950641025641]}}	[u'AF-P0ABA0-F1-model_v2_&_NOBFS_0']	156	1	1	1
AF-P0ABA4-F1-model_v2_&_NOBFS_0	ALPHAFOLD	{u'b3735': 1}	77.5172	{u'b3735': {u'A': [True, 77.51723163841808]}}	[u'AF-P0ABA4-F1-model_v2_&_NOBFS_0']	177	1	1	1
AF-P0ABA6-F1-model_v2_&_NOBFS_0	ALPHAFOLD	{u'b3733': 1}	90.7902	{u'b3733': {u'A': [True, 90.79020905923345]}}	[u'AF-P0ABA6-F1-model_v2_&_NOBFS_0']	287	1	1	1
AF-P0ABB0-F1-model_v2_&_NOBFS_0	ALPHAFOLD	{u'b3734': 1}	92.4868	{u'b3734': {u'A': [True, 92.48676413255359]}}	[u'AF-P0ABB0-F1-model_v2_&_NOBFS_0']	513	1	1	1
AF-P0ABB4-F1-model_v2_&_NOBFS_0	ALPHAFOLD	{u'b3732': 1}	90.3773	{u'b3732': {u'A': [True, 90.37732608695651]}}	[u'AF-P0ABB4-F1-model_v2_&_NOBFS_0']	460	1	1	1
AF-P0ABB8-F1-model_v2_&_NOBFS_0	ALPHAFOLD	{u'b4242': 1}	83.4277	{u'b4242': {u'A': [True, 83.42765033407574]}}	[u'AF-P0ABB8-F1-model_v2_&_NOBFS_0']	898	1	1	1
AF-P0ABC0-F1-model_v2_&_NOBFS_0	ALPHAFOLD	{u'b3739': 1}	82.0202	{u'b3739': {u'A': [True, 82.0202380952381]}}	[u'AF-P0ABC0-F1-model_v2_&_NOBFS_0']	126	1	1	1
AF-P0ABC3-F1-model_v2_&_NOBFS_0	ALPHAFOLD	{u'b4175': 1}	83.7865	{u'b4175': {u'A': [True, 83.78646706586827]}}	[u'AF-P0ABC3-F1-model_v2_&_NOBFS_0']	334	1	1	1
AF-P0ABC7-F1-model_v2_&_NOBFS_0	ALPHAFOLD	{u'b4174': 1}	74.2521	{u'b4174': {u'A': [True, 74.25212410501193]}}	[u'AF-P0ABC7-F1-model_v2_&_NOBFS_0']	419	1	1	1
AF-P0ABC9-F1-model_v2_&_NOBFS_0	ALPHAFOLD	{u'b0314': 1}	89.7176	{u'b0314': {u'A': [True, 89.71756277695715]}}	[u'AF-P0ABC9-F1-model_v2_&_NOBFS_0']	677	1	1	1
AF-P0ABD1-F1-model_v2_&_NOBFS_0	ALPHAFOLD	{u'b1801': 1}	88.2183	{u'b1801': {u'A': [True, 88.21827442827444]}}	[u'AF-P0ABD1-F1-model_v2_&_NOBFS_0']	481	1	1	1
AF-P0ABD3-F1-model_v2_&_NOBFS_0	ALPHAFOLD	{u'b3336': 1}	97.5536	{u'b3336': {u'A': [True, 97.55360759493671]}}	[u'AF-P0ABD3-F1-model_v2_&_NOBFS_0']	158	1	1	1
AF-P0ABD5-F1-model_v2_&_NOBFS_0	ALPHAFOLD	{u'b0185': 1}	95.4292	{u'b0185': {u'A': [True, 95.42918495297806]}}	[u'AF-P0ABD5-F1-model_v2_&_NOBFS_0']	319	1	1	1
AF-P0ABD8-F1-model_v2_&_NOBFS_0	ALPHAFOLD	{u'b3255': 1}	81.4379	{u'b3255': {u'A': [True, 81.43788461538462]}}	[u'AF-P0ABD8-F1-model_v2_&_NOBFS_0']	156	1	1	1
AF-P0ABE2-F1-model_v2_&_NOBFS_0	ALPHAFOLD	{u'b0435': 1}	90.5358	{u'b0435': {u'A': [True, 90.53580952380952]}}	[u'AF-P0ABE2-F1-model_v2_&_NOBFS_0']	105	1	1	1
AF-P0ABE5-F1-model_v2_&_NOBFS_0	ALPHAFOLD	{u'b1418': 1}	95.1057	{u'b1418': {u'A': [True, 95.10573863636364]}}	[u'AF-P0ABE5-F1-model_v2_&_NOBFS_0']	176	1	1	1
AF-P0ABE9-F1-model_v2_&_NOBFS_0	ALPHAFOLD	{u'b0339': 1}	96.4705	{u'b0339': {u'A': [True, 96.47050228310502]}}	[u'AF-P0ABE9-F1-model_v2_&_NOBFS_0']	219	1	1	1
AF-P0ABF1-F1-model_v2_&_NOBFS_0	ALPHAFOLD	{u'b0143': 1}	84.9752	{u'b0143': {u'A': [True, 84.97520430107527]}}	[u'AF-P0ABF1-F1-model_v2_&_NOBFS_0']	465	1	1	1
AF-P0ABF4-F1-model_v2_&_NOBFS_0	ALPHAFOLD	{u'b2457': 1}	93.7098	{u'b2457': {u'A': [True, 93.709793814433]}}	[u'AF-P0ABF4-F1-model_v2_&_NOBFS_0']	97	1	1	1
AF-P0ABF6-F1-model_v2_&_NOBFS_0	ALPHAFOLD	{u'b2143': 1}	97.8522	{u'b2143': {u'A': [True, 97.85217687074831]}}	[u'AF-P0ABF6-F1-model_v2_&_NOBFS_0']	294	1	1	1
AF-P0ABF8-F1-model_v2_&_NOBFS_0	ALPHAFOLD	{u'b1912': 1}	88.7807	{u'b1912': {u'A': [True, 88.78071428571428]}}	[u'AF-P0ABF8-F1-model_v2_&_NOBFS_0']	182	1	1	1
AF-P0ABG1-F1-model_v2_&_NOBFS_0	ALPHAFOLD	{u'b0175': 1}	92.6975	{u'b0175': {u'A': [True, 92.69754385964913]}}	[u'AF-P0ABG1-F1-model_v2_&_NOBFS_0']	285	1	1	1
AF-P0ABG4-F1-model_v2_&_NOBFS_0	ALPHAFOLD	{u'b0089': 1}	85.2968	{u'b0089': {u'A': [True, 85.29676328502416]}}	[u'AF-P0ABG4-F1-model_v2_&_NOBFS_0']	414	1	1	1
AF-P0ABG7-F1-model_v2_&_NOBFS_0	ALPHAFOLD	{u'b0634': 1}	86.4046	{u'b0634': {u'A': [True, 86.40464864864865]}}	[u'AF-P0ABG7-F1-model_v2_&_NOBFS_0']	370	1	1	1
AF-P0ABH0-F1-model_v2_&_NOBFS_0	ALPHAFOLD	{u'b0094': 1}	91.238	{u'b0094': {u'A': [True, 91.2380476190476]}}	[u'AF-P0ABH0-F1-model_v2_&_NOBFS_0']	420	1	1	1
AF-P0ABH4-F1-model_v2_&_NOBFS_0	ALPHAFOLD	{u'b3249': 1}	85.611	{u'b3249': {u'A': [True, 85.61098765432098]}}	[u'AF-P0ABH4-F1-model_v2_&_NOBFS_0']	162	1	1	1
AF-P0ABH7-F1-model_v2_&_NOBFS_0	ALPHAFOLD	{u'b0720': 1}	94.2189	{u'b0720': {u'A': [True, 94.21887587822016]}}	[u'AF-P0ABH7-F1-model_v2_&_NOBFS_0']	427	1	1	1
AF-P0ABH9-F1-model_v2_&_NOBFS_0	ALPHAFOLD	{u'b0882': 1}	84.1102	{u'b0882': {u'A': [True, 84.11019788918206]}}	[u'AF-P0ABH9-F1-model_v2_&_NOBFS_0']	758	1	1	1
AF-P0ABI4-F1-model_v2_&_NOBFS_0	ALPHAFOLD	{u'b3816': 1}	91.6703	{u'b3816': {u'A': [True, 91.67034810126583]}}	[u'AF-P0ABI4-F1-model_v2_&_NOBFS_0']	316	1	1	1
AF-P0ABI8-F1-model_v2_&_NOBFS_0	ALPHAFOLD	{u'b0431': 1}	93.5346	{u'b0431': {u'A': [True, 93.53461538461538]}}	[u'AF-P0ABI8-F1-model_v2_&_NOBFS_0']	663	1	1	1
AF-P0ABJ1-F1-model_v2_&_NOBFS_0	ALPHAFOLD	{u'b0432': 1}	78.802	{u'b0432': {u'A': [True, 78.80203174603174]}}	[u'AF-P0ABJ1-F1-model_v2_&_NOBFS_0']	315	1	1	1
AF-P0ABJ3-F1-model_v2_&_NOBFS_0	ALPHAFOLD	{u'b0430': 1}	66.9294	{u'b0430': {u'A': [True, 66.92941176470588]}}	[u'AF-P0ABJ3-F1-model_v2_&_NOBFS_0']	204	1	1	1
AF-P0ABJ6-F1-model_v2_&_NOBFS_0	ALPHAFOLD	{u'b0429': 1}	79.8805	{u'b0429': {u'A': [True, 79.88045871559632]}}	[u'AF-P0ABJ6-F1-model_v2_&_NOBFS_0']	109	1	1	1
AF-P0ABJ9-F1-model_v2_&_NOBFS_0	ALPHAFOLD	{u'b0733': 1}	92.5193	{u'b0733': {u'A': [True, 92.51929118773948]}}	[u'AF-P0ABJ9-F1-model_v2_&_NOBFS_0']	522	1	1	1
AF-P0ABK2-F1-model_v2_&_NOBFS_0	ALPHAFOLD	{u'b0734': 1}	93.6491	{u'b0734': {u'A': [True, 93.64912928759894]}}	[u'AF-P0ABK2-F1-model_v2_&_NOBFS_0']	379	1	1	1
AF-P0ABK5-F1-model_v2_&_NOBFS_0	ALPHAFOLD	{u'b2414': 1}	96.6479	{u'b2414': {u'A': [True, 96.64786377708978]}}	[u'AF-P0ABK5-F1-model_v2_&_NOBFS_0']	323	1	1	1
AF-P0ABK7-F1-model_v2_&_NOBFS_0	ALPHAFOLD	{u'b1041': 1}	77.4652	{u'b1041': {u'A': [True, 77.46523178807946]}}	[u'AF-P0ABK7-F1-model_v2_&_NOBFS_0']	151	1	1	1
AF-P0ABK9-F1-model_v2_&_NOBFS_0	ALPHAFOLD	{u'b4070': 1}	94.7715	{u'b4070': {u'A': [True, 94.77154811715482]}}	[u'AF-P0ABK9-F1-model_v2_&_NOBFS_0']	478	1	1	1
AF-P0ABL1-F1-model_v2_&_NOBFS_0	ALPHAFOLD	{u'b4071': 1}	86.9534	{u'b4071': {u'A': [True, 86.95340425531914]}}	[u'AF-P0ABL1-F1-model_v2_&_NOBFS_0']	188	1	1	1
AF-P0ABL3-F1-model_v2_&_NOBFS_0	ALPHAFOLD	{u'b2203': 1}	90.8086	{u'b2203': {u'A': [True, 90.80859060402685]}}	[u'AF-P0ABL3-F1-model_v2_&_NOBFS_0']	149	1	1	1
AF-P0ABL5-F1-model_v2_&_NOBFS_0	ALPHAFOLD	{u'b2202': 1}	91.3511	{u'b2202': {u'A': [True, 91.35105]}}	[u'AF-P0ABL5-F1-model_v2_&_NOBFS_0']	200	1	1	1
AF-P0ABL8-F1-model_v2_&_NOBFS_0	ALPHAFOLD	{u'b2200': 1}	92.6901	{u'b2200': {u'A': [True, 92.69009090909087]}}	[u'AF-P0ABL8-F1-model_v2_&_NOBFS_0']	220	1	1	1
AF-P0ABM1-F1-model_v2_&_NOBFS_0	ALPHAFOLD	{u'b2199': 1}	91.1252	{u'b2199': {u'A': [True, 91.12518367346938]}}	[u'AF-P0ABM1-F1-model_v2_&_NOBFS_0']	245	1	1	1
AF-P0ABM5-F1-model_v2_&_NOBFS_0	ALPHAFOLD	{u'b2198': 1}	86.6665	{u'b2198': {u'A': [True, 86.66652173913043]}}	[u'AF-P0ABM5-F1-model_v2_&_NOBFS_0']	69	1	1	1
AF-P0ABM9-F1-model_v2_&_NOBFS_0	ALPHAFOLD	{u'b2194': 1}	89.6	{u'b2194': {u'A': [True, 89.60002857142855]}}	[u'AF-P0ABM9-F1-model_v2_&_NOBFS_0']	350	1	1	1
AF-P0ABN1-F1-model_v2_&_NOBFS_0	ALPHAFOLD	{u'b4042': 1}	92.7693	{u'b4042': {u'A': [True, 92.76926229508196]}}	[u'AF-P0ABN1-F1-model_v2_&_NOBFS_0']	122	1	1	1
AF-P0ABN5-F1-model_v2_&_NOBFS_0	ALPHAFOLD	{u'b4138': 1}	92.5538	{u'b4138': {u'A': [True, 92.55378752886837]}}	[u'AF-P0ABN5-F1-model_v2_&_NOBFS_0']	433	1	1	1
AF-P0ABN9-F1-model_v2_&_NOBFS_0	ALPHAFOLD	{u'b4123': 1}	91.4583	{u'b4123': {u'A': [True, 91.45827354260089]}}	[u'AF-P0ABN9-F1-model_v2_&_NOBFS_0']	446	1	1	1
AF-P0ABP3-F1-model_v2_&_NOBFS_0	ALPHAFOLD	{u'b0621': 1}	87.0992	{u'b0621': {u'A': [True, 87.0992190889371]}}	[u'AF-P0ABP3-F1-model_v2_&_NOBFS_0']	461	1	1	1
AF-P0ABP6-F1-model_v2_&_NOBFS_0	ALPHAFOLD	{u'b2317': 1}	76.5711	{u'b2317': {u'A': [True, 76.5710502283105]}}	[u'AF-P0ABP6-F1-model_v2_&_NOBFS_0']	219	1	1	1
AF-P0ABP8-F1-model_v2_&_NOBFS_0	ALPHAFOLD	{u'b4384': 1}	97.04	{u'b4384': {u'A': [True, 97.0399581589958]}}	[u'AF-P0ABP8-F1-model_v2_&_NOBFS_0']	239	1	1	1
AF-P0ABQ0-F1-model_v2_&_NOBFS_0	ALPHAFOLD	{u'b3639': 1}	93.6425	{u'b3639': {u'A': [True, 93.6425369458128]}}	[u'AF-P0ABQ0-F1-model_v2_&_NOBFS_0']	406	1	1	1
AF-P0ABQ2-F1-model_v2_&_NOBFS_0	ALPHAFOLD	{u'b3125': 1}	98.0564	{u'b3125': {u'A': [True, 98.05636054421768]}}	[u'AF-P0ABQ2-F1-model_v2_&_NOBFS_0']	294	1	1	1
AF-P0ABQ4-F1-model_v2_&_NOBFS_0	ALPHAFOLD	{u'b0048': 1}	96.2133	{u'b0048': {u'A': [True, 96.21327044025158]}}	[u'AF-P0ABQ4-F1-model_v2_&_NOBFS_0']	159	1	1	1
AF-P0ABR1-F1-model_v2_&_NOBFS_0	ALPHAFOLD	{u'b1061': 1}	93.8438	{u'b1061': {u'A': [True, 93.84382716049383]}}	[u'AF-P0ABR1-F1-model_v2_&_NOBFS_0']	81	1	1	1
AF-P0ABR5-F1-model_v2_&_NOBFS_0	ALPHAFOLD	{u'b2538': 1}	93.9641	{u'b2538': {u'A': [True, 93.96410596026492]}}	[u'AF-P0ABR5-F1-model_v2_&_NOBFS_0']	453	1	1	1
AF-P0ABR7-F1-model_v2_&_NOBFS_0	ALPHAFOLD	{u'b1802': 1}	95.888	{u'b1802': {u'A': [True, 95.8879679144385]}}	[u'AF-P0ABR7-F1-model_v2_&_NOBFS_0']	374	1	1	1
AF-P0ABR9-F1-model_v2_&_NOBFS_0	ALPHAFOLD	{u'b0348': 1}	97.1905	{u'b0348': {u'A': [True, 97.19047770700637]}}	[u'AF-P0ABR9-F1-model_v2_&_NOBFS_0']	314	1	1	1
AF-P0ABS1-F1-model_v2_&_NOBFS_0	ALPHAFOLD	{u'b0145': 1}	89.6243	{u'b0145': {u'A': [True, 89.62430463576159]}}	[u'AF-P0ABS1-F1-model_v2_&_NOBFS_0']	151	1	1	1
AF-P0ABS5-F1-model_v2_&_NOBFS_0	ALPHAFOLD	{u'b3066': 1}	87.9065	{u'b3066': {u'A': [True, 87.9064543889845]}}	[u'AF-P0ABS5-F1-model_v2_&_NOBFS_0']	581	1	1	1
AF-P0ABS8-F1-model_v2_&_NOBFS_0	ALPHAFOLD	{u'b1842': 1}	75.1522	{u'b1842': {u'A': [True, 75.15223684210525]}}	[u'AF-P0ABS8-F1-model_v2_&_NOBFS_0']	76	1	1	1
AF-P0ABT2-F1-model_v2_&_NOBFS_0	ALPHAFOLD	{u'b0812': 1}	94.5235	{u'b0812': {u'A': [True, 94.52353293413174]}}	[u'AF-P0ABT2-F1-model_v2_&_NOBFS_0']	167	1	1	1
AF-P0ABT5-F1-model_v2_&_NOBFS_0	ALPHAFOLD	{u'b3260': 1}	95.5879	{u'b3260': {u'A': [True, 95.58794392523366]}}	[u'AF-P0ABT5-F1-model_v2_&_NOBFS_0']	321	1	1	1
AF-P0ABT8-F1-model_v2_&_NOBFS_0	ALPHAFOLD	{u'b3943': 1}	88.2213	{u'b3943': {u'A': [True, 88.2213289036545]}}	[u'AF-P0ABT8-F1-model_v2_&_NOBFS_0']	301	1	1	1
AF-P0ABU0-F1-model_v2_&_NOBFS_0	ALPHAFOLD	{u'b2262': 1}	97.2269	{u'b2262': {u'A': [True, 97.22687719298247]}}	[u'AF-P0ABU0-F1-model_v2_&_NOBFS_0']	285	1	1	1
AF-P0ABU2-F1-model_v2_&_NOBFS_0	ALPHAFOLD	{u'b1203': 1}	90.4933	{u'b1203': {u'A': [True, 90.49327823691459]}}	[u'AF-P0ABU2-F1-model_v2_&_NOBFS_0']	363	1	1	1
AF-P0ABU5-F1-model_v2_&_NOBFS_0	ALPHAFOLD	{u'b3209': 1}	98.5388	{u'b3209': {u'A': [True, 98.53880184331797]}}	[u'AF-P0ABU5-F1-model_v2_&_NOBFS_0']	217	1	1	1
AF-P0ABU7-F1-model_v2_&_NOBFS_0	ALPHAFOLD	{u'b3006': 1}	90.2828	{u'b3006': {u'A': [True, 90.2827868852459]}}	[u'AF-P0ABU7-F1-model_v2_&_NOBFS_0']	244	1	1	1
AF-P0ABU9-F1-model_v2_&_NOBFS_0	ALPHAFOLD	{u'b0737': 1}	91.7821	{u'b0737': {u'A': [True, 91.78208695652172]}}	[u'AF-P0ABU9-F1-model_v2_&_NOBFS_0']	230	1	1	1
AF-P0ABV2-F1-model_v2_&_NOBFS_0	ALPHAFOLD	{u'b3005': 1}	77.6264	{u'b3005': {u'A': [True, 77.6263829787234]}}	[u'AF-P0ABV2-F1-model_v2_&_NOBFS_0']	141	1	1	1
AF-P0ABV6-F1-model_v2_&_NOBFS_0	ALPHAFOLD	{u'b0738': 1}	78.7321	{u'b0738': {u'A': [True, 78.73211267605633]}}	[u'AF-P0ABV6-F1-model_v2_&_NOBFS_0']	142	1	1	1
AF-P0ABW0-F1-model_v2_&_NOBFS_0	ALPHAFOLD	{u'b2540': 1}	96.1299	{u'b2540': {u'A': [True, 96.12990566037735]}}	[u'AF-P0ABW0-F1-model_v2_&_NOBFS_0']	106	1	1	1
AF-P0ABW3-F1-model_v2_&_NOBFS_0	ALPHAFOLD	{u'b2236': 1}	96.0601	{u'b2236': {u'A': [True, 96.06011904761904]}}	[u'AF-P0ABW3-F1-model_v2_&_NOBFS_0']	84	1	1	1
AF-P0ABW5-F1-model_v2_&_NOBFS_0	ALPHAFOLD	{u'b0530': 1}	87.8412	{u'b0530': {u'A': [True, 87.84116666666665]}}	[u'AF-P0ABW5-F1-model_v2_&_NOBFS_0']	180	1	1	1
AF-P0ABW9-F1-model_v2_&_NOBFS_0	ALPHAFOLD	{u'b1073': 1}	87.9875	{u'b1073': {u'A': [True, 87.98753623188405]}}	[u'AF-P0ABW9-F1-model_v2_&_NOBFS_0']	138	1	1	1
AF-P0ABX2-F1-model_v2_&_NOBFS_0	ALPHAFOLD	{u'b1074': 1}	91.3954	{u'b1074': {u'A': [True, 91.39537313432837]}}	[u'AF-P0ABX2-F1-model_v2_&_NOBFS_0']	134	1	1	1
AF-P0ABX5-F1-model_v2_&_NOBFS_0	ALPHAFOLD	{u'b1078': 1}	86.7772	{u'b1078': {u'A': [True, 86.7771923076923]}}	[u'AF-P0ABX5-F1-model_v2_&_NOBFS_0']	260	1	1	1
AF-P0ABX8-F1-model_v2_&_NOBFS_0	ALPHAFOLD	{u'b1944': 1}	85.5797	{u'b1944': {u'A': [True, 85.57974025974025]}}	[u'AF-P0ABX8-F1-model_v2_&_NOBFS_0']	154	1	1	1
AF-P0ABY2-F1-model_v2_&_NOBFS_0	ALPHAFOLD	{u'b1926': 1}	84.7588	{u'b1926': {u'A': [True, 84.75876033057853]}}	[u'AF-P0ABY2-F1-model_v2_&_NOBFS_0']	121	1	1	1
AF-P0ABY4-F1-model_v2_&_NOBFS_0	ALPHAFOLD	{u'b2895': 1}	97.2946	{u'b2895': {u'A': [True, 97.29456647398844]}}	[u'AF-P0ABY4-F1-model_v2_&_NOBFS_0']	173	1	1	1
AF-P0ABY7-F1-model_v2_&_NOBFS_0	ALPHAFOLD	{u'b1891': 1}	86.8781	{u'b1891': {u'A': [True, 86.87807291666667]}}	[u'AF-P0ABY7-F1-model_v2_&_NOBFS_0']	192	1	1	1
AF-P0ABZ1-F1-model_v2_&_NOBFS_0	ALPHAFOLD	{u'b1939': 1}	81.3788	{u'b1939': {u'A': [True, 81.37882175226586]}}	[u'AF-P0ABZ1-F1-model_v2_&_NOBFS_0']	331	1	1	1
AF-P0ABZ4-F1-model_v2_&_NOBFS_0	ALPHAFOLD	{u'b3198': 1}	96.7115	{u'b3198': {u'A': [True, 96.7115425531915]}}	[u'AF-P0ABZ4-F1-model_v2_&_NOBFS_0']	188	1	1	1
AF-P0ABZ6-F1-model_v2_&_NOBFS_0	ALPHAFOLD	{u'b0053': 1}	90.0462	{u'b0053': {u'A': [True, 90.04616822429907]}}	[u'AF-P0ABZ6-F1-model_v2_&_NOBFS_0']	428	1	1	1
AF-P0AC00-F1-model_v2_&_NOBFS_0	ALPHAFOLD	{u'b3371': 1}	96.6986	{u'b3371': {u'A': [True, 96.69861764705882]}}	[u'AF-P0AC00-F1-model_v2_&_NOBFS_0']	340	1	1	1
AF-P0AC02-F1-model_v2_&_NOBFS_0	ALPHAFOLD	{u'b2595': 1}	91.1647	{u'b2595': {u'A': [True, 91.16465306122448]}}	[u'AF-P0AC02-F1-model_v2_&_NOBFS_0']	245	1	1	1
AF-P0AC05-F1-model_v2_&_NOBFS_0	ALPHAFOLD	{u'b1948': 1}	86.918	{u'b1948': {u'A': [True, 86.91800000000002]}}	[u'AF-P0AC05-F1-model_v2_&_NOBFS_0']	245	1	1	1
AF-P0AC07-F1-model_v2_&_NOBFS_0	ALPHAFOLD	{u'b1949': 1}	92.9144	{u'b1949': {u'A': [True, 92.9143820224719]}}	[u'AF-P0AC07-F1-model_v2_&_NOBFS_0']	89	1	1	1
AF-P0AC13-F1-model_v2_&_NOBFS_0	ALPHAFOLD	{u'b3177': 1}	93.3189	{u'b3177': {u'A': [True, 93.31893617021278]}}	[u'AF-P0AC13-F1-model_v2_&_NOBFS_0']	282	1	1	1
AF-P0AC16-F1-model_v2_&_NOBFS_0	ALPHAFOLD	{u'b3058': 1}	95.5833	{u'b3058': {u'A': [True, 95.58327868852457]}}	[u'AF-P0AC16-F1-model_v2_&_NOBFS_0']	122	1	1	1
AF-P0AC19-F1-model_v2_&_NOBFS_0	ALPHAFOLD	{u'b2303': 1}	93.6035	{u'b2303': {u'A': [True, 93.6035]}}	[u'AF-P0AC19-F1-model_v2_&_NOBFS_0']	120	1	1	1
AF-P0AC23-F1-model_v2_&_NOBFS_0	ALPHAFOLD	{u'b0904': 1}	95.3424	{u'b0904': {u'A': [True, 95.34235087719298]}}	[u'AF-P0AC23-F1-model_v2_&_NOBFS_0']	285	1	1	1
AF-P0AC26-F1-model_v2_&_NOBFS_0	ALPHAFOLD	{u'b3367': 1}	95.7901	{u'b3367': {u'A': [True, 95.7901119402985]}}	[u'AF-P0AC26-F1-model_v2_&_NOBFS_0']	268	1	1	1
AF-P0AC28-F1-model_v2_&_NOBFS_0	ALPHAFOLD	{u'b2912': 1}	94.759	{u'b2912': {u'A': [True, 94.75901098901099]}}	[u'AF-P0AC28-F1-model_v2_&_NOBFS_0']	182	1	1	1
AF-P0AC30-F1-model_v2_&_NOBFS_0	ALPHAFOLD	{u'b3462': 1}	79.4384	{u'b3462': {u'A': [True, 79.43838068181817]}}	[u'AF-P0AC30-F1-model_v2_&_NOBFS_0']	352	1	1	1
AF-P0AC33-F1-model_v2_&_NOBFS_0	ALPHAFOLD	{u'b1612': 1}	96.2854	{u'b1612': {u'A': [True, 96.2854197080292]}}	[u'AF-P0AC33-F1-model_v2_&_NOBFS_0']	548	1	1	1
AF-P0AC35-F1-model_v2_&_NOBFS_0	ALPHAFOLD	{u'b3062': 1}	97.2458	{u'b3062': {u'A': [True, 97.24577114427859]}}	[u'AF-P0AC35-F1-model_v2_&_NOBFS_0']	201	1	1	1
AF-P0AC38-F1-model_v2_&_NOBFS_0	ALPHAFOLD	{u'b4139': 1}	97.1003	{u'b4139': {u'A': [True, 97.10025104602511]}}	[u'AF-P0AC38-F1-model_v2_&_NOBFS_0']	478	1	1	1
AF-P0AC41-F1-model_v2_&_NOBFS_0	ALPHAFOLD	{u'b0723': 1}	96.5507	{u'b0723': {u'A': [True, 96.55069727891156]}}	[u'AF-P0AC41-F1-model_v2_&_NOBFS_0']	588	1	1	1
AF-P0AC44-F1-model_v2_&_NOBFS_0	ALPHAFOLD	{u'b0722': 1}	94.5778	{u'b0722': {u'A': [True, 94.5778260869565]}}	[u'AF-P0AC44-F1-model_v2_&_NOBFS_0']	115	1	1	1
AF-P0AC47-F1-model_v2_&_NOBFS_0	ALPHAFOLD	{u'b4153': 1}	96.3347	{u'b4153': {u'A': [True, 96.33467213114754]}}	[u'AF-P0AC47-F1-model_v2_&_NOBFS_0']	244	1	1	1
AF-P0AC51-F1-model_v2_&_NOBFS_0	ALPHAFOLD	{u'b4046': 1}	90.8742	{u'b4046': {u'A': [True, 90.87415204678364]}}	[u'AF-P0AC51-F1-model_v2_&_NOBFS_0']	171	1	1	1
AF-P0AC53-F1-model_v2_&_NOBFS_0	ALPHAFOLD	{u'b1852': 1}	93.6599	{u'b1852': {u'A': [True, 93.65985743380855]}}	[u'AF-P0AC53-F1-model_v2_&_NOBFS_0']	491	1	1	1
AF-P0AC55-F1-model_v2_&_NOBFS_0	ALPHAFOLD	{u'b0450': 1}	92.3282	{u'b0450': {u'A': [True, 92.32821428571428]}}	[u'AF-P0AC55-F1-model_v2_&_NOBFS_0']	112	1	1	1
AF-P0AC59-F1-model_v2_&_NOBFS_0	ALPHAFOLD	{u'b1064': 1}	98.5807	{u'b1064': {u'A': [True, 98.5806976744186]}}	[u'AF-P0AC59-F1-model_v2_&_NOBFS_0']	215	1	1	1
AF-P0AC62-F1-model_v2_&_NOBFS_0	ALPHAFOLD	{u'b3610': 1}	92.426	{u'b3610': {u'A': [True, 92.42602409638553]}}	[u'AF-P0AC62-F1-model_v2_&_NOBFS_0']	83	1	1	1
AF-P0AC65-F1-model_v2_&_NOBFS_0	ALPHAFOLD	{u'b2673': 1}	91.8763	{u'b2673': {u'A': [True, 91.8762962962963]}}	[u'AF-P0AC65-F1-model_v2_&_NOBFS_0']	81	1	1	1
AF-P0AC69-F1-model_v2_&_NOBFS_0	ALPHAFOLD	{u'b1654': 1}	84.4677	{u'b1654': {u'A': [True, 84.4677391304348]}}	[u'AF-P0AC69-F1-model_v2_&_NOBFS_0']	115	1	1	1
AF-P0AC73-F1-model_v2_&_NOBFS_0	ALPHAFOLD	{u'b3077': 1}	93.5061	{u'b3077': {u'A': [True, 93.50610738255034]}}	[u'AF-P0AC73-F1-model_v2_&_NOBFS_0']	149	1	1	1
AF-P0AC75-F1-model_v2_&_NOBFS_0	ALPHAFOLD	{u'b3633': 1}	94.2911	{u'b3633': {u'A': [True, 94.29108235294119]}}	[u'AF-P0AC75-F1-model_v2_&_NOBFS_0']	425	1	1	1
AF-P0AC78-F1-model_v2_&_NOBFS_0	ALPHAFOLD	{u'b3784': 1}	90.6635	{u'b3784': {u'A': [True, 90.66348773841962]}}	[u'AF-P0AC78-F1-model_v2_&_NOBFS_0']	367	1	1	1
AF-P0AC81-F1-model_v2_&_NOBFS_0	ALPHAFOLD	{u'b1651': 1}	97.2546	{u'b1651': {u'A': [True, 97.25459259259259]}}	[u'AF-P0AC81-F1-model_v2_&_NOBFS_0']	135	1	1	1
AF-P0AC84-F1-model_v2_&_NOBFS_0	ALPHAFOLD	{u'b0212': 1}	98.2127	{u'b0212': {u'A': [True, 98.21274900398407]}}	[u'AF-P0AC84-F1-model_v2_&_NOBFS_0']	251	1	1	1
AF-P0AC86-F1-model_v2_&_NOBFS_0	ALPHAFOLD	{u'b3428': 1}	95.0224	{u'b3428': {u'A': [True, 95.02235582822087]}}	[u'AF-P0AC86-F1-model_v2_&_NOBFS_0']	815	1	1	1
AF-P0AC88-F1-model_v2_&_NOBFS_0	ALPHAFOLD	{u'b2053': 1}	96.9014	{u'b2053': {u'A': [True, 96.90142091152818]}}	[u'AF-P0AC88-F1-model_v2_&_NOBFS_0']	373	1	1	1
AF-P0AC92-F1-model_v2_&_NOBFS_0	ALPHAFOLD	{u'b4517': 1}	96.2632	{u'b4517': {u'A': [True, 96.26315789473684]}}	[u'AF-P0AC92-F1-model_v2_&_NOBFS_0']	57	1	1	1
AF-P0AC94-F1-model_v2_&_NOBFS_0	ALPHAFOLD	{u'b4321': 1}	89.7628	{u'b4321': {u'A': [True, 89.76275167785236]}}	[u'AF-P0AC94-F1-model_v2_&_NOBFS_0']	447	1	1	1
AF-P0AC96-F1-model_v2_&_NOBFS_0	ALPHAFOLD	{u'b4476': 1}	88.9436	{u'b4476': {u'A': [True, 88.94356502242152]}}	[u'AF-P0AC96-F1-model_v2_&_NOBFS_0']	446	1	1	1
AF-P0AC98-F1-model_v2_&_NOBFS_0	ALPHAFOLD	{u'b0010': 1}	97.0069	{u'b0010': {u'A': [True, 97.00686170212767]}}	[u'AF-P0AC98-F1-model_v2_&_NOBFS_0']	188	1	1	1
AF-P0ACA1-F1-model_v2_&_NOBFS_0	ALPHAFOLD	{u'b3592': 1}	97.2201	{u'b3592': {u'A': [True, 97.22009900990099]}}	[u'AF-P0ACA1-F1-model_v2_&_NOBFS_0']	202	1	1	1
AF-P0ACA3-F1-model_v2_&_NOBFS_0	ALPHAFOLD	{u'b3229': 1}	94.9038	{u'b3229': {u'A': [True, 94.90382075471699]}}	[u'AF-P0ACA3-F1-model_v2_&_NOBFS_0']	212	1	1	1
AF-P0ACA7-F1-model_v2_&_NOBFS_0	ALPHAFOLD	{u'b0838': 1}	98.1469	{u'b0838': {u'A': [True, 98.146875]}}	[u'AF-P0ACA7-F1-model_v2_&_NOBFS_0']	208	1	1	1
AF-P0ACB0-F1-model_v2_&_NOBFS_0	ALPHAFOLD	{u'b4052': 1}	88.6243	{u'b4052': {u'A': [True, 88.62430997876858]}}	[u'AF-P0ACB0-F1-model_v2_&_NOBFS_0']	471	1	1	1
AF-P0ACB2-F1-model_v2_&_NOBFS_0	ALPHAFOLD	{u'b0369': 1}	97.9695	{u'b0369': {u'A': [True, 97.96950617283952]}}	[u'AF-P0ACB2-F1-model_v2_&_NOBFS_0']	324	1	1	1
AF-P0ACB4-F1-model_v2_&_NOBFS_0	ALPHAFOLD	{u'b3850': 1}	95.4908	{u'b3850': {u'A': [True, 95.49082872928177]}}	[u'AF-P0ACB4-F1-model_v2_&_NOBFS_0']	181	1	1	1
AF-P0ACB7-F1-model_v2_&_NOBFS_0	ALPHAFOLD	{u'b3802': 1}	90.6555	{u'b3802': {u'A': [True, 90.65547738693469]}}	[u'AF-P0ACB7-F1-model_v2_&_NOBFS_0']	398	1	1	1
AF-P0ACC1-F1-model_v2_&_NOBFS_0	ALPHAFOLD	{u'b1212': 1}	95.6072	{u'b1212': {u'A': [True, 95.60722021660649]}}	[u'AF-P0ACC1-F1-model_v2_&_NOBFS_0']	277	1	1	1
AF-P0ACC3-F1-model_v2_&_NOBFS_0	ALPHAFOLD	{u'b0156': 1}	75.3629	{u'b0156': {u'A': [True, 75.36289473684211]}}	[u'AF-P0ACC3-F1-model_v2_&_NOBFS_0']	114	1	1	1
AF-P0ACC7-F1-model_v2_&_NOBFS_0	ALPHAFOLD	{u'b3730': 1}	96.4846	{u'b3730': {u'A': [True, 96.48462719298246]}}	[u'AF-P0ACC7-F1-model_v2_&_NOBFS_0']	456	1	1	1
AF-P0ACC9-F1-model_v2_&_NOBFS_0	ALPHAFOLD	{u'b2058': 1}	96.4977	{u'b2058': {u'A': [True, 96.49765432098766]}}	[u'AF-P0ACC9-F1-model_v2_&_NOBFS_0']	162	1	1	1
AF-P0ACD2-F1-model_v2_&_NOBFS_0	ALPHAFOLD	{u'b2054': 1}	97.6512	{u'b2054': {u'A': [True, 97.65115384615386]}}	[u'AF-P0ACD2-F1-model_v2_&_NOBFS_0']	182	1	1	1
AF-P0ACD4-F1-model_v2_&_NOBFS_0	ALPHAFOLD	{u'b2529': 1}	86.6726	{u'b2529': {u'A': [True, 86.672578125]}}	[u'AF-P0ACD4-F1-model_v2_&_NOBFS_0']	128	1	1	1
AF-P0ACD8-F1-model_v2_&_NOBFS_0	ALPHAFOLD	{u'b0973': 1}	96.2432	{u'b0973': {u'A': [True, 96.24324958123954]}}	[u'AF-P0ACD8-F1-model_v2_&_NOBFS_0']	597	1	1	1
AF-P0ACE0-F1-model_v2_&_NOBFS_0	ALPHAFOLD	{u'b2994': 1}	96.335	{u'b2994': {u'A': [True, 96.33495590828925]}}	[u'AF-P0ACE0-F1-model_v2_&_NOBFS_0']	567	1	1	1
AF-P0ACE3-F1-model_v2_&_NOBFS_0	ALPHAFOLD	{u'b0460': 1}	90.0329	{u'b0460': {u'A': [True, 90.03291666666668]}}	[u'AF-P0ACE3-F1-model_v2_&_NOBFS_0']	72	1	1	1
AF-P0ACE7-F1-model_v2_&_NOBFS_0	ALPHAFOLD	{u'b1103': 1}	95.6591	{u'b1103': {u'A': [True, 95.6590756302521]}}	[u'AF-P0ACE7-F1-model_v2_&_NOBFS_0']	119	1	1	1
AF-P0ACF0-F1-model_v2_&_NOBFS_0	ALPHAFOLD	{u'b4000': 1}	96.6211	{u'b4000': {u'A': [True, 96.62111111111113]}}	[u'AF-P0ACF0-F1-model_v2_&_NOBFS_0']	90	1	1	1
AF-P0ACF4-F1-model_v2_&_NOBFS_0	ALPHAFOLD	{u'b0440': 1}	97.419	{u'b0440': {u'A': [True, 97.41900000000001]}}	[u'AF-P0ACF4-F1-model_v2_&_NOBFS_0']	90	1	1	1
AF-P0ACF8-F1-model_v2_&_NOBFS_0	ALPHAFOLD	{u'b1237': 1}	85.6093	{u'b1237': {u'A': [True, 85.6092700729927]}}	[u'AF-P0ACF8-F1-model_v2_&_NOBFS_0']	137	1	1	1
AF-P0ACG1-F1-model_v2_&_NOBFS_0	ALPHAFOLD	{u'b2669': 1}	83.3444	{u'b2669': {u'A': [True, 83.34440298507464]}}	[u'AF-P0ACG1-F1-model_v2_&_NOBFS_0']	134	1	1	1
AF-P0ACG4-F1-model_v2_&_NOBFS_0	ALPHAFOLD	{u'b4412': 1}	71.8778	{u'b4412': {u'A': [True, 71.87780000000001]}}	[u'AF-P0ACG4-F1-model_v2_&_NOBFS_0']	50	1	1	1
AF-P0ACG6-F1-model_v2_&_NOBFS_0	ALPHAFOLD	{u'b1562': 1}	71.9729	{u'b1562': {u'A': [True, 71.97294117647057]}}	[u'AF-P0ACG6-F1-model_v2_&_NOBFS_0']	51	1	1	1
AF-P0ACG8-F1-model_v2_&_NOBFS_0	ALPHAFOLD	{u'b3400': 1}	91.4454	{u'b3400': {u'A': [True, 91.44541353383457]}}	[u'AF-P0ACG8-F1-model_v2_&_NOBFS_0']	133	1	1	1
AF-P0ACH1-F1-model_v2_&_NOBFS_0	ALPHAFOLD	{u'b3188': 1}	85.6662	{u'b3188': {u'A': [True, 85.6661956521739]}}	[u'AF-P0ACH1-F1-model_v2_&_NOBFS_0']	92	1	1	1
AF-P0ACH5-F1-model_v2_&_NOBFS_0	ALPHAFOLD	{u'b1531': 1}	91.9256	{u'b1531': {u'A': [True, 91.92559055118109]}}	[u'AF-P0ACH5-F1-model_v2_&_NOBFS_0']	127	1	1	1
AF-P0ACH8-F1-model_v2_&_NOBFS_0	ALPHAFOLD	{u'b4118': 1}	85.1659	{u'b4118': {u'A': [True, 85.16586092715232]}}	[u'AF-P0ACH8-F1-model_v2_&_NOBFS_0']	302	1	1	1
AF-P0ACI0-F1-model_v2_&_NOBFS_0	ALPHAFOLD	{u'b4396': 1}	90.3646	{u'b4396': {u'A': [True, 90.36460207612457]}}	[u'AF-P0ACI0-F1-model_v2_&_NOBFS_0']	289	1	1	1
AF-P0ACI3-F1-model_v2_&_NOBFS_0	ALPHAFOLD	{u'b3569': 1}	90.1055	{u'b3569': {u'A': [True, 90.10548469387753]}}	[u'AF-P0ACI3-F1-model_v2_&_NOBFS_0']	392	1	1	1
AF-P0ACI6-F1-model_v2_&_NOBFS_0	ALPHAFOLD	{u'b3743': 1}	96.6151	{u'b3743': {u'A': [True, 96.61513157894737]}}	[u'AF-P0ACI6-F1-model_v2_&_NOBFS_0']	152	1	1	1
AF-P0ACJ0-F1-model_v2_&_NOBFS_0	ALPHAFOLD	{u'b0889': 1}	93.1925	{u'b0889': {u'A': [True, 93.1925]}}	[u'AF-P0ACJ0-F1-model_v2_&_NOBFS_0']	164	1	1	1
AF-P0ACJ5-F1-model_v2_&_NOBFS_0	ALPHAFOLD	{u'b0447': 1}	96.1287	{u'b0447': {u'A': [True, 96.12868421052633]}}	[u'AF-P0ACJ5-F1-model_v2_&_NOBFS_0']	152	1	1	1
AF-P0ACJ8-F1-model_v2_&_NOBFS_0	ALPHAFOLD	{u'b3357': 1}	94.0516	{u'b3357': {u'A': [True, 94.05161904761904]}}	[u'AF-P0ACJ8-F1-model_v2_&_NOBFS_0']	210	1	1	1
AF-P0ACK2-F1-model_v2_&_NOBFS_0	ALPHAFOLD	{u'b3131': 1}	89.7784	{u'b3131': {u'A': [True, 89.77843866171004]}}	[u'AF-P0ACK2-F1-model_v2_&_NOBFS_0']	269	1	1	1
AF-P0ACK5-F1-model_v2_&_NOBFS_0	ALPHAFOLD	{u'b0840': 1}	90.7515	{u'b0840': {u'A': [True, 90.75150793650793]}}	[u'AF-P0ACK5-F1-model_v2_&_NOBFS_0']	252	1	1	1
AF-P0ACK8-F1-model_v2_&_NOBFS_0	ALPHAFOLD	{u'b2805': 1}	91.1995	{u'b2805': {u'A': [True, 91.19954732510287]}}	[u'AF-P0ACK8-F1-model_v2_&_NOBFS_0']	243	1	1	1
AF-P0ACL0-F1-model_v2_&_NOBFS_0	ALPHAFOLD	{u'b3423': 1}	92.3825	{u'b3423': {u'A': [True, 92.3825]}}	[u'AF-P0ACL0-F1-model_v2_&_NOBFS_0']	252	1	1	1
AF-P0ACL2-F1-model_v2_&_NOBFS_0	ALPHAFOLD	{u'b3094': 1}	83.5209	{u'b3094': {u'A': [True, 83.52089147286821]}}	[u'AF-P0ACL2-F1-model_v2_&_NOBFS_0']	258	1	1	1
AF-P0ACL5-F1-model_v2_&_NOBFS_0	ALPHAFOLD	{u'b2980': 1}	87.6353	{u'b2980': {u'A': [True, 87.63527559055119]}}	[u'AF-P0ACL5-F1-model_v2_&_NOBFS_0']	254	1	1	1
AF-P0ACL7-F1-model_v2_&_NOBFS_0	ALPHAFOLD	{u'b3604': 1}	85.0894	{u'b3604': {u'A': [True, 85.08941860465116]}}	[u'AF-P0ACL7-F1-model_v2_&_NOBFS_0']	258	1	1	1
AF-P0ACL9-F1-model_v2_&_NOBFS_0	ALPHAFOLD	{u'b0113': 1}	91.4213	{u'b0113': {u'A': [True, 91.42125984251969]}}	[u'AF-P0ACL9-F1-model_v2_&_NOBFS_0']	254	1	1	1
AF-P0ACM2-F1-model_v2_&_NOBFS_0	ALPHAFOLD	{u'b1540': 1}	94.5971	{u'b1540': {u'A': [True, 94.59706140350876]}}	[u'AF-P0ACM2-F1-model_v2_&_NOBFS_0']	228	1	1	1
AF-P0ACM5-F1-model_v2_&_NOBFS_0	ALPHAFOLD	{u'b2101': 1}	91.0506	{u'b2101': {u'A': [True, 91.05056451612903]}}	[u'AF-P0ACM5-F1-model_v2_&_NOBFS_0']	248	1	1	1
AF-P0ACM9-F1-model_v2_&_NOBFS_0	ALPHAFOLD	{u'b3872': 1}	92.5243	{u'b3872': {u'A': [True, 92.52427966101693]}}	[u'AF-P0ACM9-F1-model_v2_&_NOBFS_0']	236	1	1	1
AF-P0ACN2-F1-model_v2_&_NOBFS_0	ALPHAFOLD	{u'b4212': 1}	93.9134	{u'b4212': {u'A': [True, 93.9134126984127]}}	[u'AF-P0ACN2-F1-model_v2_&_NOBFS_0']	126	1	1	1
AF-P0ACN4-F1-model_v2_&_NOBFS_0	ALPHAFOLD	{u'b0506': 1}	91.0982	{u'b0506': {u'A': [True, 91.09822878228782]}}	[u'AF-P0ACN4-F1-model_v2_&_NOBFS_0']	271	1	1	1
AF-P0ACN7-F1-model_v2_&_NOBFS_0	ALPHAFOLD	{u'b3934': 1}	89.3696	{u'b3934': {u'A': [True, 89.36961876832845]}}	[u'AF-P0ACN7-F1-model_v2_&_NOBFS_0']	341	1	1	1
AF-P0ACP1-F1-model_v2_&_NOBFS_0	ALPHAFOLD	{u'b0080': 1}	94.5991	{u'b0080': {u'A': [True, 94.59910179640718]}}	[u'AF-P0ACP1-F1-model_v2_&_NOBFS_0']	334	1	1	1
AF-P0ACP5-F1-model_v2_&_NOBFS_0	ALPHAFOLD	{u'b3438': 1}	95.0625	{u'b3438': {u'A': [True, 95.0625075528701]}}	[u'AF-P0ACP5-F1-model_v2_&_NOBFS_0']	331	1	1	1
AF-P0ACP7-F1-model_v2_&_NOBFS_0	ALPHAFOLD	{u'b1658': 1}	95.3968	{u'b1658': {u'A': [True, 95.39683284457477]}}	[u'AF-P0ACP7-F1-model_v2_&_NOBFS_0']	341	1	1	1
AF-P0ACQ0-F1-model_v2_&_NOBFS_0	ALPHAFOLD	{u'b3753': 1}	90.0708	{u'b3753': {u'A': [True, 90.07081818181818]}}	[u'AF-P0ACQ0-F1-model_v2_&_NOBFS_0']	330	1	1	1
AF-P0ACQ4-F1-model_v2_&_NOBFS_0	ALPHAFOLD	{u'b3961': 1}	91.7979	{u'b3961': {u'A': [True, 91.7979344262295]}}	[u'AF-P0ACQ4-F1-model_v2_&_NOBFS_0']	305	1	1	1
AF-P0ACQ7-F1-model_v2_&_NOBFS_0	ALPHAFOLD	{u'b3118': 1}	89.4353	{u'b3118': {u'A': [True, 89.43532051282051]}}	[u'AF-P0ACQ7-F1-model_v2_&_NOBFS_0']	312	1	1	1
AF-P0ACR0-F1-model_v2_&_NOBFS_0	ALPHAFOLD	{u'b0504': 1}	94.4114	{u'b0504': {u'A': [True, 94.41142857142856]}}	[u'AF-P0ACR0-F1-model_v2_&_NOBFS_0']	308	1	1	1
AF-P0ACR2-F1-model_v2_&_NOBFS_0	ALPHAFOLD	{u'b1659': 1}	91.2855	{u'b1659': {u'A': [True, 91.28554838709678]}}	[u'AF-P0ACR2-F1-model_v2_&_NOBFS_0']	310	1	1	1
AF-P0ACR4-F1-model_v2_&_NOBFS_0	ALPHAFOLD	{u'b2157': 1}	93.8424	{u'b2157': {u'A': [True, 93.84242320819114]}}	[u'AF-P0ACR4-F1-model_v2_&_NOBFS_0']	293	1	1	1
AF-P0ACR7-F1-model_v2_&_NOBFS_0	ALPHAFOLD	{u'b2409': 1}	93.308	{u'b2409': {u'A': [True, 93.30798701298701]}}	[u'AF-P0ACR7-F1-model_v2_&_NOBFS_0']	308	1	1	1
AF-P0ACR9-F1-model_v2_&_NOBFS_0	ALPHAFOLD	{u'b2684': 1}	90.0231	{u'b2684': {u'A': [True, 90.02306818181818]}}	[u'AF-P0ACR9-F1-model_v2_&_NOBFS_0']	176	1	1	1
AF-P0ACS2-F1-model_v2_&_NOBFS_0	ALPHAFOLD	{u'b4063': 1}	81.8596	{u'b4063': {u'A': [True, 81.85961038961038]}}	[u'AF-P0ACS2-F1-model_v2_&_NOBFS_0']	154	1	1	1
AF-P0ACS5-F1-model_v2_&_NOBFS_0	ALPHAFOLD	{u'b3292': 1}	93.0755	{u'b3292': {u'A': [True, 93.0754609929078]}}	[u'AF-P0ACS5-F1-model_v2_&_NOBFS_0']	141	1	1	1
AF-P0ACS7-F1-model_v2_&_NOBFS_0	ALPHAFOLD	{u'b4089': 1}	90.7852	{u'b4089': {u'A': [True, 90.78516891891891]}}	[u'AF-P0ACS7-F1-model_v2_&_NOBFS_0']	296	1	1	1
AF-P0ACS9-F1-model_v2_&_NOBFS_0	ALPHAFOLD	{u'b0464': 1}	93.4236	{u'b0464': {u'A': [True, 93.42362790697675]}}	[u'AF-P0ACS9-F1-model_v2_&_NOBFS_0']	215	1	1	1
AF-P0ACT2-F1-model_v2_&_NOBFS_0	ALPHAFOLD	{u'b3264': 1}	89.258	{u'b3264': {u'A': [True, 89.25804545454547]}}	[u'AF-P0ACT2-F1-model_v2_&_NOBFS_0']	220	1	1	1
AF-P0ACT6-F1-model_v2_&_NOBFS_0	ALPHAFOLD	{u'b1618': 1}	92.5584	{u'b1618': {u'A': [True, 92.55836734693878]}}	[u'AF-P0ACT6-F1-model_v2_&_NOBFS_0']	196	1	1	1
AF-P0ACU0-F1-model_v2_&_NOBFS_0	ALPHAFOLD	{u'b0796': 1}	95.2463	{u'b0796': {u'A': [True, 95.24632286995516]}}	[u'AF-P0ACU0-F1-model_v2_&_NOBFS_0']	223	1	1	1
AF-P0ACU2-F1-model_v2_&_NOBFS_0	ALPHAFOLD	{u'b1013': 1}	94.8043	{u'b1013': {u'A': [True, 94.8043396226415]}}	[u'AF-P0ACU2-F1-model_v2_&_NOBFS_0']	212	1	1	1
AF-P0ACU5-F1-model_v2_&_NOBFS_0	ALPHAFOLD	{u'b3963': 1}	89.2619	{u'b3963': {u'A': [True, 89.26188034188034]}}	[u'AF-P0ACU5-F1-model_v2_&_NOBFS_0']	234	1	1	1
AF-P0ACU7-F1-model_v2_&_NOBFS_0	ALPHAFOLD	{u'b4135': 1}	95.1358	{u'b4135': {u'A': [True, 95.1358115183246]}}	[u'AF-P0ACU7-F1-model_v2_&_NOBFS_0']	191	1	1	1
AF-P0ACV0-F1-model_v2_&_NOBFS_0	ALPHAFOLD	{u'b1054': 1}	96.7635	{u'b1054': {u'A': [True, 96.76346405228757]}}	[u'AF-P0ACV0-F1-model_v2_&_NOBFS_0']	306	1	1	1
AF-P0ACV2-F1-model_v2_&_NOBFS_0	ALPHAFOLD	{u'b2378': 1}	96.1524	{u'b2378': {u'A': [True, 96.15235294117647]}}	[u'AF-P0ACV2-F1-model_v2_&_NOBFS_0']	306	1	1	1
AF-P0ACV4-F1-model_v2_&_NOBFS_0	ALPHAFOLD	{u'b1279': 1}	85.9737	{u'b1279': {u'A': [True, 85.97372549019612]}}	[u'AF-P0ACV4-F1-model_v2_&_NOBFS_0']	102	1	1	1
AF-P0ACV6-F1-model_v2_&_NOBFS_0	ALPHAFOLD	{u'b1326': 1}	95.6137	{u'b1326': {u'A': [True, 95.61371900826448]}}	[u'AF-P0ACV6-F1-model_v2_&_NOBFS_0']	242	1	1	1
AF-P0ACV8-F1-model_v2_&_NOBFS_0	ALPHAFOLD	{u'b1295': 1}	91.7963	{u'b1295': {u'A': [True, 91.79629629629629]}}	[u'AF-P0ACV8-F1-model_v2_&_NOBFS_0']	81	1	1	1
AF-P0ACW0-F1-model_v2_&_NOBFS_0	ALPHAFOLD	{u'b4527': 1}	91.8908	{u'b4527': {u'A': [True, 91.89078431372548]}}	[u'AF-P0ACW0-F1-model_v2_&_NOBFS_0']	51	1	1	1
AF-P0ACW2-F1-model_v2_&_NOBFS_0	ALPHAFOLD	{u'b4529': 1}	74.6377	{u'b4529': {u'A': [True, 74.63772727272728]}}	[u'AF-P0ACW2-F1-model_v2_&_NOBFS_0']	88	1	1	1
AF-P0ACW4-F1-model_v2_&_NOBFS_0	ALPHAFOLD	{u'b1419': 1}	81.603	{u'b1419': {u'A': [True, 81.60298245614034]}}	[u'AF-P0ACW4-F1-model_v2_&_NOBFS_0']	57	1	1	1
AF-P0ACW6-F1-model_v2_&_NOBFS_0	ALPHAFOLD	{u'b1426': 1}	92.5262	{u'b1426': {u'A': [True, 92.52621621621621]}}	[u'AF-P0ACW6-F1-model_v2_&_NOBFS_0']	74	1	1	1
AF-P0ACW8-F1-model_v2_&_NOBFS_0	ALPHAFOLD	{u'b1571': 1}	82.8155	{u'b1571': {u'A': [True, 82.81549019607843]}}	[u'AF-P0ACW8-F1-model_v2_&_NOBFS_0']	51	1	1	1
AF-P0ACX0-F1-model_v2_&_NOBFS_0	ALPHAFOLD	{u'b1607': 1}	94.5154	{u'b1607': {u'A': [True, 94.51540540540543]}}	[u'AF-P0ACX0-F1-model_v2_&_NOBFS_0']	111	1	1	1
AF-P0ACX3-F1-model_v2_&_NOBFS_0	ALPHAFOLD	{u'b1667': 1}	96.276	{u'b1667': {u'A': [True, 96.27603960396038]}}	[u'AF-P0ACX3-F1-model_v2_&_NOBFS_0']	101	1	1	1
AF-P0ACX5-F1-model_v2_&_NOBFS_0	ALPHAFOLD	{u'b1675': 1}	93.177	{u'b1675': {u'A': [True, 93.17695652173914]}}	[u'AF-P0ACX5-F1-model_v2_&_NOBFS_0']	69	1	1	1
AF-P0ACX9-F1-model_v2_&_NOBFS_0	ALPHAFOLD	{u'b1705': 1}	84.5598	{u'b1705': {u'A': [True, 84.55984126984127]}}	[u'AF-P0ACX9-F1-model_v2_&_NOBFS_0']	63	1	1	1
AF-P0ACY1-F1-model_v2_&_NOBFS_0	ALPHAFOLD	{u'b1765': 1}	95.9279	{u'b1765': {u'A': [True, 95.92786885245901]}}	[u'AF-P0ACY1-F1-model_v2_&_NOBFS_0']	183	1	1	1
AF-P0ACY3-F1-model_v2_&_NOBFS_0	ALPHAFOLD	{u'b1783': 1}	89.4719	{u'b1783': {u'A': [True, 89.47194099378882]}}	[u'AF-P0ACY3-F1-model_v2_&_NOBFS_0']	644	1	1	1
AF-P0ACY6-F1-model_v2_&_NOBFS_0	ALPHAFOLD	{u'b1789': 1}	84.5055	{u'b1789': {u'A': [True, 84.50554054054054]}}	[u'AF-P0ACY6-F1-model_v2_&_NOBFS_0']	148	1	1	1
AF-P0ACY9-F1-model_v2_&_NOBFS_0	ALPHAFOLD	{u'b1848': 1}	77.0019	{u'b1848': {u'A': [True, 77.001875]}}	[u'AF-P0ACY9-F1-model_v2_&_NOBFS_0']	96	1	1	1
AF-P0ACZ2-F1-model_v2_&_NOBFS_0	ALPHAFOLD	{u'b0982': 1}	95.7848	{u'b0982': {u'A': [True, 95.7847972972973]}}	[u'AF-P0ACZ2-F1-model_v2_&_NOBFS_0']	148	1	1	1
AF-P0ACZ4-F1-model_v2_&_NOBFS_0	ALPHAFOLD	{u'b2369': 1}	92.1787	{u'b2369': {u'A': [True, 92.17867647058821]}}	[u'AF-P0ACZ4-F1-model_v2_&_NOBFS_0']	204	1	1	1
AF-P0ACZ8-F1-model_v2_&_NOBFS_0	ALPHAFOLD	{u'b0571': 1}	85.6488	{u'b0571': {u'A': [True, 85.64876651982378]}}	[u'AF-P0ACZ8-F1-model_v2_&_NOBFS_0']	227	1	1	1
AF-P0AD01-F1-model_v2_&_NOBFS_0	ALPHAFOLD	{u'b4124': 1}	89.0095	{u'b4124': {u'A': [True, 89.00945606694562]}}	[u'AF-P0AD01-F1-model_v2_&_NOBFS_0']	239	1	1	1
AF-P0AD03-F1-model_v2_&_NOBFS_0	ALPHAFOLD	{u'b1833': 1}	86.2526	{u'b1833': {u'A': [True, 86.25264637002341]}}	[u'AF-P0AD03-F1-model_v2_&_NOBFS_0']	427	1	1	1
AF-P0AD05-F1-model_v2_&_NOBFS_0	ALPHAFOLD	{u'b1908': 1}	93.5217	{u'b1908': {u'A': [True, 93.5216742081448]}}	[u'AF-P0AD05-F1-model_v2_&_NOBFS_0']	221	1	1	1
AF-P0AD07-F1-model_v2_&_NOBFS_0	ALPHAFOLD	{u'b1915': 1}	95.1611	{u'b1915': {u'A': [True, 95.16108108108108]}}	[u'AF-P0AD07-F1-model_v2_&_NOBFS_0']	74	1	1	1
AF-P0AD10-F1-model_v2_&_NOBFS_0	ALPHAFOLD	{u'b4537': 1}	81.9782	{u'b4537': {u'A': [True, 81.97819277108434]}}	[u'AF-P0AD10-F1-model_v2_&_NOBFS_0']	83	1	1	1
AF-P0AD12-F1-model_v2_&_NOBFS_0	ALPHAFOLD	{u'b2016': 1}	93.0532	{u'b2016': {u'A': [True, 93.05321167883213]}}	[u'AF-P0AD12-F1-model_v2_&_NOBFS_0']	274	1	1	1
AF-P0AD14-F1-model_v2_&_NOBFS_0	ALPHAFOLD	{u'b2126': 1}	88.7797	{u'b2126': {u'A': [True, 88.77966131907309]}}	[u'AF-P0AD14-F1-model_v2_&_NOBFS_0']	561	1	1	1
AF-P0AD17-F1-model_v2_&_NOBFS_0	ALPHAFOLD	{u'b2135': 1}	83.2169	{u'b2135': {u'A': [True, 83.21687179487179]}}	[u'AF-P0AD17-F1-model_v2_&_NOBFS_0']	195	1	1	1
AF-P0AD19-F1-model_v2_&_NOBFS_0	ALPHAFOLD	{u'b2142': 1}	90.4749	{u'b2142': {u'A': [True, 90.47489177489176]}}	[u'AF-P0AD19-F1-model_v2_&_NOBFS_0']	231	1	1	1
AF-P0AD21-F1-model_v2_&_NOBFS_0	ALPHAFOLD	{u'b2181': 1}	80.3162	{u'b2181': {u'A': [True, 80.31622807017544]}}	[u'AF-P0AD21-F1-model_v2_&_NOBFS_0']	114	1	1	1
AF-P0AD24-F1-model_v2_&_NOBFS_0	ALPHAFOLD	{u'b2187': 1}	88.7108	{u'b2187': {u'A': [True, 88.71079999999999]}}	[u'AF-P0AD24-F1-model_v2_&_NOBFS_0']	75	1	1	1
AF-P0AD27-F1-model_v2_&_NOBFS_0	ALPHAFOLD	{u'b2188': 1}	90.8462	{u'b2188': {u'A': [True, 90.84621160409556]}}	[u'AF-P0AD27-F1-model_v2_&_NOBFS_0']	586	1	1	1
AF-P0AD30-F1-model_v2_&_NOBFS_0	ALPHAFOLD	{u'b2327': 1}	88.0897	{u'b2327': {u'A': [True, 88.08970260223049]}}	[u'AF-P0AD30-F1-model_v2_&_NOBFS_0']	269	1	1	1
AF-P0AD33-F1-model_v2_&_NOBFS_0	ALPHAFOLD	{u'b2343': 1}	80.4509	{u'b2343': {u'A': [True, 80.45085106382979]}}	[u'AF-P0AD33-F1-model_v2_&_NOBFS_0']	94	1	1	1
AF-P0AD35-F1-model_v2_&_NOBFS_0	ALPHAFOLD	{u'b2358': 1}	82.715	{u'b2358': {u'A': [True, 82.71500000000002]}}	[u'AF-P0AD35-F1-model_v2_&_NOBFS_0']	122	1	1	1
AF-P0AD37-F1-model_v2_&_NOBFS_0	ALPHAFOLD	{u'b2398': 1}	84.3586	{u'b2398': {u'A': [True, 84.35859649122808]}}	[u'AF-P0AD37-F1-model_v2_&_NOBFS_0']	114	1	1	1
AF-P0AD40-F1-model_v2_&_NOBFS_0	ALPHAFOLD	{u'b4546': 1}	96.3688	{u'b4546': {u'A': [True, 96.36875]}}	[u'AF-P0AD40-F1-model_v2_&_NOBFS_0']	72	1	1	1
AF-P0AD42-F1-model_v2_&_NOBFS_0	ALPHAFOLD	{u'b2560': 1}	93.5079	{u'b2560': {u'A': [True, 93.50791469194314]}}	[u'AF-P0AD42-F1-model_v2_&_NOBFS_0']	211	1	1	1
AF-P0AD44-F1-model_v2_&_NOBFS_0	ALPHAFOLD	{u'b2555': 1}	81.012	{u'b2555': {u'A': [True, 81.01198312236285]}}	[u'AF-P0AD44-F1-model_v2_&_NOBFS_0']	237	1	1	1
AF-P0AD47-F1-model_v2_&_NOBFS_0	ALPHAFOLD	{u'b2543': 1}	94.8449	{u'b2543': {u'A': [True, 94.84485714285714]}}	[u'AF-P0AD47-F1-model_v2_&_NOBFS_0']	140	1	1	1
AF-P0AD49-F1-model_v2_&_NOBFS_0	ALPHAFOLD	{u'b2597': 1}	88.9417	{u'b2597': {u'A': [True, 88.9416814159292]}}	[u'AF-P0AD49-F1-model_v2_&_NOBFS_0']	113	1	1	1
AF-P0AD53-F1-model_v2_&_NOBFS_0	ALPHAFOLD	{u'b2671': 1}	95.7938	{u'b2671': {u'A': [True, 95.79377192982457]}}	[u'AF-P0AD53-F1-model_v2_&_NOBFS_0']	114	1	1	1
AF-P0AD57-F1-model_v2_&_NOBFS_0	ALPHAFOLD	{u'b3187': 1}	93.362	{u'b3187': {u'A': [True, 93.36204334365324]}}	[u'AF-P0AD57-F1-model_v2_&_NOBFS_0']	323	1	1	1
AF-P0AD59-F1-model_v2_&_NOBFS_0	ALPHAFOLD	{u'b0220': 1}	89.0729	{u'b0220': {u'A': [True, 89.0728662420382]}}	[u'AF-P0AD59-F1-model_v2_&_NOBFS_0']	157	1	1	1
AF-P0AD61-F1-model_v2_&_NOBFS_0	ALPHAFOLD	{u'b1676': 1}	95.7435	{u'b1676': {u'A': [True, 95.74348936170213]}}	[u'AF-P0AD61-F1-model_v2_&_NOBFS_0']	470	1	1	1
AF-P0AD65-F1-model_v2_&_NOBFS_0	ALPHAFOLD	{u'b0635': 1}	92.065	{u'b0635': {u'A': [True, 92.06500789889415]}}	[u'AF-P0AD65-F1-model_v2_&_NOBFS_0']	633	1	1	1
AF-P0AD68-F1-model_v2_&_NOBFS_0	ALPHAFOLD	{u'b0084': 1}	90.6221	{u'b0084': {u'A': [True, 90.62207482993198]}}	[u'AF-P0AD68-F1-model_v2_&_NOBFS_0']	588	1	1	1
AF-P0AD70-F1-model_v2_&_NOBFS_0	ALPHAFOLD	{u'b0376': 1}	94.0926	{u'b0376': {u'A': [True, 94.09257142857143]}}	[u'AF-P0AD70-F1-model_v2_&_NOBFS_0']	385	1	1	1
AF-P0AD79-F1-model_v2_&_NOBFS_0	ALPHAFOLD	{u'b0075': 1}	81.2039	{u'b0075': {u'A': [True, 81.20392857142858]}}	[u'AF-P0AD79-F1-model_v2_&_NOBFS_0']	28	1	1	1
AF-P0AD83-F1-model_v2_&_NOBFS_0	ALPHAFOLD	{u'b4246': 1}	52.5632	{u'b4246': {u'A': [True, 52.563181818181825]}}	[u'AF-P0AD83-F1-model_v2_&_NOBFS_0']	44	1	1	1
AF-P0AD89-F1-model_v2_&_NOBFS_0	ALPHAFOLD	{u'b3707': 1}	83.6863	{u'b3707': {u'A': [True, 83.68625]}}	[u'AF-P0AD89-F1-model_v2_&_NOBFS_0']	24	1	1	1
AF-P0AD96-F1-model_v2_&_NOBFS_0	ALPHAFOLD	{u'b3460': 1}	95.1902	{u'b3460': {u'A': [True, 95.1901634877384]}}	[u'AF-P0AD96-F1-model_v2_&_NOBFS_0']	367	1	1	1
AF-P0AD99-F1-model_v2_&_NOBFS_0	ALPHAFOLD	{u'b0401': 1}	87.691	{u'b0401': {u'A': [True, 87.69097949886104]}}	[u'AF-P0AD99-F1-model_v2_&_NOBFS_0']	439	1	1	1
AF-P0ADA1-F1-model_v2_&_NOBFS_0	ALPHAFOLD	{u'b0494': 1}	91.4507	{u'b0494': {u'A': [True, 91.45067307692307]}}	[u'AF-P0ADA1-F1-model_v2_&_NOBFS_0']	208	1	1	1
AF-P0ADA3-F1-model_v2_&_NOBFS_0	ALPHAFOLD	{u'b2742': 1}	68.7386	{u'b2742': {u'A': [True, 68.73860158311346]}}	[u'AF-P0ADA3-F1-model_v2_&_NOBFS_0']	379	1	1	1
AF-P0ADA5-F1-model_v2_&_NOBFS_0	ALPHAFOLD	{u'b0434': 1}	92.2185	{u'b0434': {u'A': [True, 92.21848958333334]}}	[u'AF-P0ADA5-F1-model_v2_&_NOBFS_0']	192	1	1	1
AF-P0ADA7-F1-model_v2_&_NOBFS_0	ALPHAFOLD	{u'b1283': 1}	75.571	{u'b1283': {u'A': [True, 75.57097222222222]}}	[u'AF-P0ADA7-F1-model_v2_&_NOBFS_0']	72	1	1	1
AF-P0ADB1-F1-model_v2_&_NOBFS_0	ALPHAFOLD	{u'b1739': 1}	80.0938	{u'b1739': {u'A': [True, 80.09383928571427]}}	[u'AF-P0ADB1-F1-model_v2_&_NOBFS_0']	112	1	1	1
AF-P0ADB4-F1-model_v2_&_NOBFS_0	ALPHAFOLD	{u'b4410': 1}	86.6837	{u'b4410': {u'A': [True, 86.68365853658536]}}	[u'AF-P0ADB4-F1-model_v2_&_NOBFS_0']	41	1	1	1
AF-P0ADB7-F1-model_v2_&_NOBFS_0	ALPHAFOLD	{u'b4411': 1}	90.2973	{u'b4411': {u'A': [True, 90.29729166666668]}}	[u'AF-P0ADB7-F1-model_v2_&_NOBFS_0']	48	1	1	1
AF-P0ADC1-F1-model_v2_&_NOBFS_0	ALPHAFOLD	{u'b0641': 1}	87.4368	{u'b0641': {u'A': [True, 87.43678756476683]}}	[u'AF-P0ADC1-F1-model_v2_&_NOBFS_0']	193	1	1	1
AF-P0ADC3-F1-model_v2_&_NOBFS_0	ALPHAFOLD	{u'b1116': 1}	87.9015	{u'b1116': {u'A': [True, 87.90145363408521]}}	[u'AF-P0ADC3-F1-model_v2_&_NOBFS_0']	399	1	1	1
AF-P0ADC6-F1-model_v2_&_NOBFS_0	ALPHAFOLD	{u'b4262': 1}	88.0362	{u'b4262': {u'A': [True, 88.03619444444445]}}	[u'AF-P0ADC6-F1-model_v2_&_NOBFS_0']	360	1	1	1
AF-P0ADC8-F1-model_v2_&_NOBFS_0	ALPHAFOLD	{u'b4353': 1}	78.4316	{u'b4353': {u'A': [True, 78.43164179104478]}}	[u'AF-P0ADC8-F1-model_v2_&_NOBFS_0']	67	1	1	1
AF-P0ADD2-F1-model_v2_&_NOBFS_0	ALPHAFOLD	{u'b4363': 1}	93.5504	{u'b4363': {u'A': [True, 93.5503821656051]}}	[u'AF-P0ADD2-F1-model_v2_&_NOBFS_0']	157	1	1	1
AF-P0ADD5-F1-model_v2_&_NOBFS_0	ALPHAFOLD	{u'b4364': 1}	92.4592	{u'b4364': {u'A': [True, 92.45917968749998]}}	[u'AF-P0ADD5-F1-model_v2_&_NOBFS_0']	256	1	1	1
AF-P0ADD7-F1-model_v2_&_NOBFS_0	ALPHAFOLD	{u'b4365': 1}	83.4398	{u'b4365': {u'A': [True, 83.4397510373444]}}	[u'AF-P0ADD7-F1-model_v2_&_NOBFS_0']	241	1	1	1
AF-P0ADD9-F1-model_v2_&_NOBFS_0	ALPHAFOLD	{u'b4402': 1}	76.9989	{u'b4402': {u'A': [True, 76.99891304347827]}}	[u'AF-P0ADD9-F1-model_v2_&_NOBFS_0']	46	1	1	1
AF-P0ADE2-F1-model_v2_&_NOBFS_0	ALPHAFOLD	{u'b4217': 1}	95.2671	{u'b4217': {u'A': [True, 95.26705882352941]}}	[u'AF-P0ADE2-F1-model_v2_&_NOBFS_0']	68	1	1	1
AF-P0ADE4-F1-model_v2_&_NOBFS_0	ALPHAFOLD	{u'b4220': 1}	92.9427	{u'b4220': {u'A': [True, 92.94270363951472]}}	[u'AF-P0ADE4-F1-model_v2_&_NOBFS_0']	577	1	1	1
AF-P0ADE6-F1-model_v2_&_NOBFS_0	ALPHAFOLD	{u'b2665': 1}	91.7807	{u'b2665': {u'A': [True, 91.78073825503355]}}	[u'AF-P0ADE6-F1-model_v2_&_NOBFS_0']	149	1	1	1
AF-P0ADE8-F1-model_v2_&_NOBFS_0	ALPHAFOLD	{u'b2898': 1}	96.5042	{u'b2898': {u'A': [True, 96.5041717791411]}}	[u'AF-P0ADE8-F1-model_v2_&_NOBFS_0']	326	1	1	1
AF-P0ADF3-F1-model_v2_&_NOBFS_0	ALPHAFOLD	{u'b3782': 1}	66.6124	{u'b3782': {u'A': [True, 66.61242424242424]}}	[u'AF-P0ADF3-F1-model_v2_&_NOBFS_0']	33	1	1	1
AF-P0ADF6-F1-model_v2_&_NOBFS_0	ALPHAFOLD	{u'b1851': 1}	95.3614	{u'b1851': {u'A': [True, 95.36144278606965]}}	[u'AF-P0ADF6-F1-model_v2_&_NOBFS_0']	603	1	1	1
AF-P0ADF8-F1-model_v2_&_NOBFS_0	ALPHAFOLD	{u'b3670': 1}	82.1928	{u'b3670': {u'A': [True, 82.1928125]}}	[u'AF-P0ADF8-F1-model_v2_&_NOBFS_0']	96	1	1	1
AF-P0ADG1-F1-model_v2_&_NOBFS_0	ALPHAFOLD	{u'b3769': 1}	87.2357	{u'b3769': {u'A': [True, 87.23574712643678]}}	[u'AF-P0ADG1-F1-model_v2_&_NOBFS_0']	87	1	1	1
AF-P0ADG4-F1-model_v2_&_NOBFS_0	ALPHAFOLD	{u'b2533': 1}	95.8048	{u'b2533': {u'A': [True, 95.80479400749064]}}	[u'AF-P0ADG4-F1-model_v2_&_NOBFS_0']	267	1	1	1
AF-P0ADG7-F1-model_v2_&_NOBFS_0	ALPHAFOLD	{u'b2508': 1}	93.6782	{u'b2508': {u'A': [True, 93.67819672131148]}}	[u'AF-P0ADG7-F1-model_v2_&_NOBFS_0']	488	1	1	1
AF-P0ADH5-F1-model_v2_&_NOBFS_0	ALPHAFOLD	{u'b4312': 1}	90.5238	{u'b4312': {u'A': [True, 90.52375]}}	[u'AF-P0ADH5-F1-model_v2_&_NOBFS_0']	200	1	1	1
AF-P0ADH7-F1-model_v2_&_NOBFS_0	ALPHAFOLD	{u'b4313': 1}	92.3159	{u'b4313': {u'A': [True, 92.31585858585858]}}	[u'AF-P0ADH7-F1-model_v2_&_NOBFS_0']	198	1	1	1
AF-P0ADI0-F1-model_v2_&_NOBFS_0	ALPHAFOLD	{u'b1374': 1}	89.2768	{u'b1374': {u'A': [True, 89.27683673469389]}}	[u'AF-P0ADI0-F1-model_v2_&_NOBFS_0']	196	1	1	1
AF-P0ADI4-F1-model_v2_&_NOBFS_0	ALPHAFOLD	{u'b0595': 1}	95.4669	{u'b0595': {u'A': [True, 95.46687719298245]}}	[u'AF-P0ADI4-F1-model_v2_&_NOBFS_0']	285	1	1	1
AF-P0ADI7-F1-model_v2_&_NOBFS_0	ALPHAFOLD	{u'b1867': 1}	98.4189	{u'b1867': {u'A': [True, 98.41893617021277]}}	[u'AF-P0ADI7-F1-model_v2_&_NOBFS_0']	188	1	1	1
AF-P0ADI9-F1-model_v2_&_NOBFS_0	ALPHAFOLD	{u'b3468': 1}	83.9256	{u'b3468': {u'A': [True, 83.92557692307693]}}	[u'AF-P0ADI9-F1-model_v2_&_NOBFS_0']	208	1	1	1
AF-P0ADJ3-F1-model_v2_&_NOBFS_0	ALPHAFOLD	{u'b3535': 1}	69.5337	{u'b3535': {u'A': [True, 69.53370967741935]}}	[u'AF-P0ADJ3-F1-model_v2_&_NOBFS_0']	62	1	1	1
AF-P0ADJ5-F1-model_v2_&_NOBFS_0	ALPHAFOLD	{u'b3537': 1}	73.3778	{u'b3537': {u'A': [True, 73.37777777777778]}}	[u'AF-P0ADJ5-F1-model_v2_&_NOBFS_0']	63	1	1	1
AF-P0ADJ8-F1-model_v2_&_NOBFS_0	ALPHAFOLD	{u'b3562': 1}	87.1069	{u'b3562': {u'A': [True, 87.10689655172413]}}	[u'AF-P0ADJ8-F1-model_v2_&_NOBFS_0']	145	1	1	1
AF-P0ADK0-F1-model_v2_&_NOBFS_0	ALPHAFOLD	{u'b3554': 1}	88.6478	{u'b3554': {u'A': [True, 88.64775423728813]}}	[u'AF-P0ADK0-F1-model_v2_&_NOBFS_0']	236	1	1	1
AF-P0ADK4-F1-model_v2_&_NOBFS_0	ALPHAFOLD	{u'b3587': 1}	90.4462	{u'b3587': {u'A': [True, 90.44616822429909]}}	[u'AF-P0ADK4-F1-model_v2_&_NOBFS_0']	107	1	1	1
AF-P0ADK6-F1-model_v2_&_NOBFS_0	ALPHAFOLD	{u'b3594': 1}	95.7971	{u'b3594': {u'A': [True, 95.79710714285714]}}	[u'AF-P0ADK6-F1-model_v2_&_NOBFS_0']	280	1	1	1
AF-P0ADK8-F1-model_v2_&_NOBFS_0	ALPHAFOLD	{u'b3602': 1}	90.0705	{u'b3602': {u'A': [True, 90.0705]}}	[u'AF-P0ADK8-F1-model_v2_&_NOBFS_0']	120	1	1	1
AF-P0ADL1-F1-model_v2_&_NOBFS_0	ALPHAFOLD	{u'b3662': 1}	91.6341	{u'b3662': {u'A': [True, 91.63409090909093]}}	[u'AF-P0ADL1-F1-model_v2_&_NOBFS_0']	396	1	1	1
AF-P0ADL3-F1-model_v2_&_NOBFS_0	ALPHAFOLD	{u'b3663': 1}	90.8152	{u'b3663': {u'A': [True, 90.81519999999999]}}	[u'AF-P0ADL3-F1-model_v2_&_NOBFS_0']	150	1	1	1
AF-P0ADL6-F1-model_v2_&_NOBFS_0	ALPHAFOLD	{u'b3675': 1}	72.9253	{u'b3675': {u'A': [True, 72.92525]}}	[u'AF-P0ADL6-F1-model_v2_&_NOBFS_0']	120	1	1	1
AF-P0ADM0-F1-model_v2_&_NOBFS_0	ALPHAFOLD	{u'b3676': 1}	80.9236	{u'b3676': {u'A': [True, 80.92356521739131]}}	[u'AF-P0ADM0-F1-model_v2_&_NOBFS_0']	115	1	1	1
AF-P0ADM4-F1-model_v2_&_NOBFS_0	ALPHAFOLD	{u'b3688': 1}	67.6678	{u'b3688': {u'A': [True, 67.66781818181818]}}	[u'AF-P0ADM4-F1-model_v2_&_NOBFS_0']	110	1	1	1
AF-P0ADM6-F1-model_v2_&_NOBFS_0	ALPHAFOLD	{u'b3696': 1}	79.6703	{u'b3696': {u'A': [True, 79.67027522935781]}}	[u'AF-P0ADM6-F1-model_v2_&_NOBFS_0']	218	1	1	1
AF-P0ADM8-F1-model_v2_&_NOBFS_0	ALPHAFOLD	{u'b3712': 1}	88.9385	{u'b3712': {u'A': [True, 88.93847389558233]}}	[u'AF-P0ADM8-F1-model_v2_&_NOBFS_0']	249	1	1	1
AF-P0ADN0-F1-model_v2_&_NOBFS_0	ALPHAFOLD	{u'b3745': 1}	84.3535	{u'b3745': {u'A': [True, 84.35345755693582]}}	[u'AF-P0ADN0-F1-model_v2_&_NOBFS_0']	483	1	1	1
AF-P0ADN2-F1-model_v2_&_NOBFS_0	ALPHAFOLD	{u'b3764': 1}	82.0315	{u'b3764': {u'A': [True, 82.03151785714286]}}	[u'AF-P0ADN2-F1-model_v2_&_NOBFS_0']	112	1	1	1
AF-P0ADN6-F1-model_v2_&_NOBFS_0	ALPHAFOLD	{u'b4558': 1}	73.4084	{u'b4558': {u'A': [True, 73.40835820895522]}}	[u'AF-P0ADN6-F1-model_v2_&_NOBFS_0']	67	1	1	1
AF-P0ADP0-F1-model_v2_&_NOBFS_0	ALPHAFOLD	{u'b3812': 1}	95.4311	{u'b3812': {u'A': [True, 95.43113445378151]}}	[u'AF-P0ADP0-F1-model_v2_&_NOBFS_0']	238	1	1	1
AF-P0ADP2-F1-model_v2_&_NOBFS_0	ALPHAFOLD	{u'b3820': 1}	96.2254	{u'b3820': {u'A': [True, 96.2254193548387]}}	[u'AF-P0ADP2-F1-model_v2_&_NOBFS_0']	155	1	1	1
AF-P0ADP5-F1-model_v2_&_NOBFS_0	ALPHAFOLD	{u'b3827': 1}	83.0524	{u'b3827': {u'A': [True, 83.05244147157191]}}	[u'AF-P0ADP5-F1-model_v2_&_NOBFS_0']	299	1	1	1
AF-P0ADP7-F1-model_v2_&_NOBFS_0	ALPHAFOLD	{u'b3834': 1}	73.8346	{u'b3834': {u'A': [True, 73.83457711442786]}}	[u'AF-P0ADP7-F1-model_v2_&_NOBFS_0']	201	1	1	1
AF-P0ADP9-F1-model_v2_&_NOBFS_0	ALPHAFOLD	{u'b3858': 1}	77.6122	{u'b3858': {u'A': [True, 77.61224719101124]}}	[u'AF-P0ADP9-F1-model_v2_&_NOBFS_0']	89	1	1	1
AF-P0ADQ2-F1-model_v2_&_NOBFS_0	ALPHAFOLD	{u'b3888': 1}	87.6195	{u'b3888': {u'A': [True, 87.619452887538]}}	[u'AF-P0ADQ2-F1-model_v2_&_NOBFS_0']	329	1	1	1
AF-P0ADQ5-F1-model_v2_&_NOBFS_0	ALPHAFOLD	{u'b3889': 1}	76.9201	{u'b3889': {u'A': [True, 76.92013888888889]}}	[u'AF-P0ADQ5-F1-model_v2_&_NOBFS_0']	72	1	1	1
AF-P0ADQ7-F1-model_v2_&_NOBFS_0	ALPHAFOLD	{u'b2672': 1}	66.4921	{u'b2672': {u'A': [True, 66.49211009174313]}}	[u'AF-P0ADQ7-F1-model_v2_&_NOBFS_0']	109	1	1	1
AF-P0ADR0-F1-model_v2_&_NOBFS_0	ALPHAFOLD	{u'b2689': 1}	84.9462	{u'b2689': {u'A': [True, 84.94619718309859]}}	[u'AF-P0ADR0-F1-model_v2_&_NOBFS_0']	142	1	1	1
AF-P0ADR2-F1-model_v2_&_NOBFS_0	ALPHAFOLD	{u'b2807': 1}	94.1785	{u'b2807': {u'A': [True, 94.17847328244275]}}	[u'AF-P0ADR2-F1-model_v2_&_NOBFS_0']	131	1	1	1
AF-P0ADR6-F1-model_v2_&_NOBFS_0	ALPHAFOLD	{u'b2806': 1}	95.3952	{u'b2806': {u'A': [True, 95.39516393442624]}}	[u'AF-P0ADR6-F1-model_v2_&_NOBFS_0']	366	1	1	1
AF-P0ADR8-F1-model_v2_&_NOBFS_0	ALPHAFOLD	{u'b2795': 1}	92.8046	{u'b2795': {u'A': [True, 92.8046255506608]}}	[u'AF-P0ADR8-F1-model_v2_&_NOBFS_0']	454	1	1	1
AF-P0ADS2-F1-model_v2_&_NOBFS_0	ALPHAFOLD	{u'b2910': 1}	92.6872	{u'b2910': {u'A': [True, 92.68715596330274]}}	[u'AF-P0ADS2-F1-model_v2_&_NOBFS_0']	109	1	1	1
AF-P0ADS6-F1-model_v2_&_NOBFS_0	ALPHAFOLD	{u'b2922': 1}	85.4502	{u'b2922': {u'A': [True, 85.45024390243903]}}	[u'AF-P0ADS6-F1-model_v2_&_NOBFS_0']	246	1	1	1
AF-P0ADS9-F1-model_v2_&_NOBFS_0	ALPHAFOLD	{u'b2958': 1}	84.5727	{u'b2958': {u'A': [True, 84.57271966527198]}}	[u'AF-P0ADS9-F1-model_v2_&_NOBFS_0']	239	1	1	1
AF-P0ADT2-F1-model_v2_&_NOBFS_0	ALPHAFOLD	{u'b3037': 1}	75.8784	{u'b3037': {u'A': [True, 75.87838565022422]}}	[u'AF-P0ADT2-F1-model_v2_&_NOBFS_0']	223	1	1	1
AF-P0ADT5-F1-model_v2_&_NOBFS_0	ALPHAFOLD	{u'b3038': 1}	96.5344	{u'b3038': {u'A': [True, 96.53437823834199]}}	[u'AF-P0ADT5-F1-model_v2_&_NOBFS_0']	386	1	1	1
AF-P0ADT8-F1-model_v2_&_NOBFS_0	ALPHAFOLD	{u'b3055': 1}	78.4832	{u'b3055': {u'A': [True, 78.48320388349514]}}	[u'AF-P0ADT8-F1-model_v2_&_NOBFS_0']	206	1	1	1
AF-P0ADU2-F1-model_v2_&_NOBFS_0	ALPHAFOLD	{u'b3029': 1}	98.0095	{u'b3029': {u'A': [True, 98.00951923076923]}}	[u'AF-P0ADU2-F1-model_v2_&_NOBFS_0']	104	1	1	1
AF-P0ADU5-F1-model_v2_&_NOBFS_0	ALPHAFOLD	{u'b3024': 1}	84.8942	{u'b3024': {u'A': [True, 84.89423076923077]}}	[u'AF-P0ADU5-F1-model_v2_&_NOBFS_0']	130	1	1	1
AF-P0ADU7-F1-model_v2_&_NOBFS_0	ALPHAFOLD	{u'b3033': 1}	76.8518	{u'b3033': {u'A': [True, 76.85178571428571]}}	[u'AF-P0ADU7-F1-model_v2_&_NOBFS_0']	140	1	1	1
AF-P0ADV1-F1-model_v2_&_NOBFS_0	ALPHAFOLD	{u'b3200': 1}	84.0062	{u'b3200': {u'A': [True, 84.0062162162162]}}	[u'AF-P0ADV1-F1-model_v2_&_NOBFS_0']	185	1	1	1
AF-P0ADV5-F1-model_v2_&_NOBFS_0	ALPHAFOLD	{u'b3160': 1}	94.9734	{u'b3160': {u'A': [True, 94.97337313432837]}}	[u'AF-P0ADV5-F1-model_v2_&_NOBFS_0']	335	1	1	1
AF-P0ADV7-F1-model_v2_&_NOBFS_0	ALPHAFOLD	{u'b3192': 1}	91.7396	{u'b3192': {u'A': [True, 91.73962085308055]}}	[u'AF-P0ADV7-F1-model_v2_&_NOBFS_0']	211	1	1	1
AF-P0ADV9-F1-model_v2_&_NOBFS_0	ALPHAFOLD	{u'b3199': 1}	91.0065	{u'b3199': {u'A': [True, 91.0065445026178]}}	[u'AF-P0ADV9-F1-model_v2_&_NOBFS_0']	191	1	1	1
AF-P0ADW3-F1-model_v2_&_NOBFS_0	ALPHAFOLD	{u'b3233': 1}	77.2745	{u'b3233': {u'A': [True, 77.27454545454546]}}	[u'AF-P0ADW3-F1-model_v2_&_NOBFS_0']	132	1	1	1
AF-P0ADW6-F1-model_v2_&_NOBFS_0	ALPHAFOLD	{u'b3211': 1}	95.4193	{u'b3211': {u'A': [True, 95.41928802588995]}}	[u'AF-P0ADW6-F1-model_v2_&_NOBFS_0']	309	1	1	1
AF-P0ADW8-F1-model_v2_&_NOBFS_0	ALPHAFOLD	{u'b4551': 1}	77.8639	{u'b4551': {u'A': [True, 77.8639393939394]}}	[u'AF-P0ADW8-F1-model_v2_&_NOBFS_0']	66	1	1	1
AF-P0ADX1-F1-model_v2_&_NOBFS_0	ALPHAFOLD	{u'b3356': 1}	97.2135	{u'b3356': {u'A': [True, 97.21350746268656]}}	[u'AF-P0ADX1-F1-model_v2_&_NOBFS_0']	134	1	1	1
AF-P0ADX5-F1-model_v2_&_NOBFS_0	ALPHAFOLD	{u'b3362': 1}	96.5735	{u'b3362': {u'A': [True, 96.57345454545457]}}	[u'AF-P0ADX5-F1-model_v2_&_NOBFS_0']	55	1	1	1
AF-P0ADX7-F1-model_v2_&_NOBFS_0	ALPHAFOLD	{u'b3448': 1}	61.2608	{u'b3448': {u'A': [True, 61.26075342465753]}}	[u'AF-P0ADX7-F1-model_v2_&_NOBFS_0']	146	1	1	1
AF-P0ADX9-F1-model_v2_&_NOBFS_0	ALPHAFOLD	{u'b3465': 1}	91.0905	{u'b3465': {u'A': [True, 91.09050505050504]}}	[u'AF-P0ADX9-F1-model_v2_&_NOBFS_0']	198	1	1	1
AF-P0ADY1-F1-model_v2_&_NOBFS_0	ALPHAFOLD	{u'b0441': 1}	91.811	{u'b0441': {u'A': [True, 91.81096308186196]}}	[u'AF-P0ADY1-F1-model_v2_&_NOBFS_0']	623	1	1	1
AF-P0ADY3-F1-model_v2_&_NOBFS_0	ALPHAFOLD	{u'b3310': 1}	95.6854	{u'b3310': {u'A': [True, 95.68536585365852]}}	[u'AF-P0ADY3-F1-model_v2_&_NOBFS_0']	123	1	1	1
AF-P0ADY7-F1-model_v2_&_NOBFS_0	ALPHAFOLD	{u'b3313': 1}	96.4069	{u'b3313': {u'A': [True, 96.40691176470588]}}	[u'AF-P0ADY7-F1-model_v2_&_NOBFS_0']	136	1	1	1
AF-P0ADZ0-F1-model_v2_&_NOBFS_0	ALPHAFOLD	{u'b3318': 1}	91.4834	{u'b3318': {u'A': [True, 91.4834]}}	[u'AF-P0ADZ0-F1-model_v2_&_NOBFS_0']	100	1	1	1
AF-P0ADZ4-F1-model_v2_&_NOBFS_0	ALPHAFOLD	{u'b3165': 1}	94.1318	{u'b3165': {u'A': [True, 94.13179775280896]}}	[u'AF-P0ADZ4-F1-model_v2_&_NOBFS_0']	89	1	1	1
AF-P0ADZ7-F1-model_v2_&_NOBFS_0	ALPHAFOLD	{u'b0407': 1}	82.5967	{u'b0407': {u'A': [True, 82.59672727272726]}}	[u'AF-P0ADZ7-F1-model_v2_&_NOBFS_0']	110	1	1	1
AF-P0AE01-F1-model_v2_&_NOBFS_0	ALPHAFOLD	{u'b2532': 1}	91.7611	{u'b2532': {u'A': [True, 91.7610975609756]}}	[u'AF-P0AE01-F1-model_v2_&_NOBFS_0']	246	1	1	1
AF-P0AE06-F1-model_v2_&_NOBFS_0	ALPHAFOLD	{u'b0463': 1}	84.9358	{u'b0463': {u'A': [True, 84.93576826196474]}}	[u'AF-P0AE06-F1-model_v2_&_NOBFS_0']	397	1	1	1
AF-P0AE08-F1-model_v2_&_NOBFS_0	ALPHAFOLD	{u'b0605': 1}	97.4965	{u'b0605': {u'A': [True, 97.49652406417111]}}	[u'AF-P0AE08-F1-model_v2_&_NOBFS_0']	187	1	1	1
AF-P0AE12-F1-model_v2_&_NOBFS_0	ALPHAFOLD	{u'b1982': 1}	90.9378	{u'b1982': {u'A': [True, 90.93776859504133]}}	[u'AF-P0AE12-F1-model_v2_&_NOBFS_0']	484	1	1	1
AF-P0AE14-F1-model_v2_&_NOBFS_0	ALPHAFOLD	{u'b0111': 1}	84.5051	{u'b0111': {u'A': [True, 84.50514084507041]}}	[u'AF-P0AE14-F1-model_v2_&_NOBFS_0']	284	1	1	1
AF-P0AE16-F1-model_v2_&_NOBFS_0	ALPHAFOLD	{u'b0433': 1}	87.9901	{u'b0433': {u'A': [True, 87.99012219959268]}}	[u'AF-P0AE16-F1-model_v2_&_NOBFS_0']	491	1	1	1
AF-P0AE18-F1-model_v2_&_NOBFS_0	ALPHAFOLD	{u'b0168': 1}	97.9513	{u'b0168': {u'A': [True, 97.95125]}}	[u'AF-P0AE18-F1-model_v2_&_NOBFS_0']	264	1	1	1
AF-P0AE22-F1-model_v2_&_NOBFS_0	ALPHAFOLD	{u'b4055': 1}	93.8092	{u'b4055': {u'A': [True, 93.80919831223628]}}	[u'AF-P0AE22-F1-model_v2_&_NOBFS_0']	237	1	1	1
AF-P0AE24-F1-model_v2_&_NOBFS_0	ALPHAFOLD	{u'b2841': 1}	88.8764	{u'b2841': {u'A': [True, 88.8764406779661]}}	[u'AF-P0AE24-F1-model_v2_&_NOBFS_0']	472	1	1	1
AF-P0AE26-F1-model_v2_&_NOBFS_0	ALPHAFOLD	{u'b4460': 1}	89.3129	{u'b4460': {u'A': [True, 89.31289634146341]}}	[u'AF-P0AE26-F1-model_v2_&_NOBFS_0']	328	1	1	1
AF-P0AE28-F1-model_v2_&_NOBFS_0	ALPHAFOLD	{u'b0390': 1}	93.1607	{u'b0390': {u'A': [True, 93.16071111111111]}}	[u'AF-P0AE28-F1-model_v2_&_NOBFS_0']	225	1	1	1
AF-P0AE30-F1-model_v2_&_NOBFS_0	ALPHAFOLD	{u'b0861': 1}	93.6132	{u'b0861': {u'A': [True, 93.61324324324325]}}	[u'AF-P0AE30-F1-model_v2_&_NOBFS_0']	222	1	1	1
AF-P0AE34-F1-model_v2_&_NOBFS_0	ALPHAFOLD	{u'b0862': 1}	90.4476	{u'b0862': {u'A': [True, 90.44764705882353]}}	[u'AF-P0AE34-F1-model_v2_&_NOBFS_0']	238	1	1	1
AF-P0AE37-F1-model_v2_&_NOBFS_0	ALPHAFOLD	{u'b1747': 1}	94.6868	{u'b1747': {u'A': [True, 94.68683139534883]}}	[u'AF-P0AE37-F1-model_v2_&_NOBFS_0']	344	1	1	1
AF-P0AE39-F1-model_v2_&_NOBFS_0	ALPHAFOLD	{u'b2381': 1}	90.0462	{u'b2381': {u'A': [True, 90.04618852459016]}}	[u'AF-P0AE39-F1-model_v2_&_NOBFS_0']	244	1	1	1
AF-P0AE42-F1-model_v2_&_NOBFS_0	ALPHAFOLD	{u'b2666': 1}	96.1046	{u'b2666': {u'A': [True, 96.1046153846154]}}	[u'AF-P0AE42-F1-model_v2_&_NOBFS_0']	52	1	1	1
AF-P0AE45-F1-model_v2_&_NOBFS_0	ALPHAFOLD	{u'b4218': 1}	86.3109	{u'b4218': {u'A': [True, 86.31085011185682]}}	[u'AF-P0AE45-F1-model_v2_&_NOBFS_0']	447	1	1	1
AF-P0AE48-F1-model_v2_&_NOBFS_0	ALPHAFOLD	{u'b4222': 1}	80.1026	{u'b4222': {u'A': [True, 80.10256637168142]}}	[u'AF-P0AE48-F1-model_v2_&_NOBFS_0']	113	1	1	1
AF-P0AE52-F1-model_v2_&_NOBFS_0	ALPHAFOLD	{u'b2480': 1}	97.7765	{u'b2480': {u'A': [True, 97.77653846153846]}}	[u'AF-P0AE52-F1-model_v2_&_NOBFS_0']	156	1	1	1
AF-P0AE56-F1-model_v2_&_NOBFS_0	ALPHAFOLD	{u'b3337': 1}	92.8075	{u'b3337': {u'A': [True, 92.8075]}}	[u'AF-P0AE56-F1-model_v2_&_NOBFS_0']	64	1	1	1
AF-P0AE58-F1-model_v2_&_NOBFS_0	ALPHAFOLD	{u'b0034': 1}	75.9582	{u'b0034': {u'A': [True, 75.95824427480915]}}	[u'AF-P0AE58-F1-model_v2_&_NOBFS_0']	131	1	1	1
AF-P0AE60-F1-model_v2_&_NOBFS_0	ALPHAFOLD	{u'b1731': 1}	74.4666	{u'b1731': {u'A': [True, 74.466625]}}	[u'AF-P0AE60-F1-model_v2_&_NOBFS_0']	80	1	1	1
AF-P0AE63-F1-model_v2_&_NOBFS_0	ALPHAFOLD	{u'b1217': 1}	87.035	{u'b1217': {u'A': [True, 87.035]}}	[u'AF-P0AE63-F1-model_v2_&_NOBFS_0']	76	1	1	1
AF-P0AE67-F1-model_v2_&_NOBFS_0	ALPHAFOLD	{u'b1882': 1}	97.0988	{u'b1882': {u'A': [True, 97.09875968992247]}}	[u'AF-P0AE67-F1-model_v2_&_NOBFS_0']	129	1	1	1
AF-P0AE70-F1-model_v2_&_NOBFS_0	ALPHAFOLD	{u'b2782': 1}	93.5721	{u'b2782': {u'A': [True, 93.57207207207206]}}	[u'AF-P0AE70-F1-model_v2_&_NOBFS_0']	111	1	1	1
AF-P0AE72-F1-model_v2_&_NOBFS_0	ALPHAFOLD	{u'b2783': 1}	92.846	{u'b2783': {u'A': [True, 92.8459756097561]}}	[u'AF-P0AE72-F1-model_v2_&_NOBFS_0']	82	1	1	1
AF-P0AE74-F1-model_v2_&_NOBFS_0	ALPHAFOLD	{u'b0612': 1}	91.635	{u'b0612': {u'A': [True, 91.63501026694045]}}	[u'AF-P0AE74-F1-model_v2_&_NOBFS_0']	487	1	1	1
AF-P0AE76-F1-model_v2_&_NOBFS_0	ALPHAFOLD	{u'b1993': 1}	94.0488	{u'b1993': {u'A': [True, 94.04878453038675]}}	[u'AF-P0AE76-F1-model_v2_&_NOBFS_0']	181	1	1	1
AF-P0AE78-F1-model_v2_&_NOBFS_0	ALPHAFOLD	{u'b0658': 1}	85.8285	{u'b0658': {u'A': [True, 85.82852739726027]}}	[u'AF-P0AE78-F1-model_v2_&_NOBFS_0']	292	1	1	1
AF-P0AE82-F1-model_v2_&_NOBFS_0	ALPHAFOLD	{u'b3911': 1}	85.5444	{u'b3911': {u'A': [True, 85.54439824945295]}}	[u'AF-P0AE82-F1-model_v2_&_NOBFS_0']	457	1	1	1
AF-P0AE85-F1-model_v2_&_NOBFS_0	ALPHAFOLD	{u'b4484': 1}	77.8217	{u'b4484': {u'A': [True, 77.82174698795181]}}	[u'AF-P0AE85-F1-model_v2_&_NOBFS_0']	166	1	1	1
AF-P0AE88-F1-model_v2_&_NOBFS_0	ALPHAFOLD	{u'b3912': 1}	92.3101	{u'b3912': {u'A': [True, 92.31012931034482]}}	[u'AF-P0AE88-F1-model_v2_&_NOBFS_0']	232	1	1	1
AF-P0AE91-F1-model_v2_&_NOBFS_0	ALPHAFOLD	{u'b4397': 1}	87.1185	{u'b4397': {u'A': [True, 87.1184713375796]}}	[u'AF-P0AE91-F1-model_v2_&_NOBFS_0']	157	1	1	1
AF-P0AE95-F1-model_v2_&_NOBFS_0	ALPHAFOLD	{u'b1039': 1}	84.7236	{u'b1039': {u'A': [True, 84.72356589147287]}}	[u'AF-P0AE95-F1-model_v2_&_NOBFS_0']	129	1	1	1
AF-P0AE98-F1-model_v2_&_NOBFS_0	ALPHAFOLD	{u'b1038': 1}	71.6685	{u'b1038': {u'A': [True, 71.66847826086956]}}	[u'AF-P0AE98-F1-model_v2_&_NOBFS_0']	138	1	1	1
AF-P0AEA2-F1-model_v2_&_NOBFS_0	ALPHAFOLD	{u'b1037': 1}	89.926	{u'b1037': {u'A': [True, 89.92602888086644]}}	[u'AF-P0AEA2-F1-model_v2_&_NOBFS_0']	277	1	1	1
AF-P0AEA5-F1-model_v2_&_NOBFS_0	ALPHAFOLD	{u'b0428': 1}	94.8453	{u'b0428': {u'A': [True, 94.84533783783785]}}	[u'AF-P0AEA5-F1-model_v2_&_NOBFS_0']	296	1	1	1
AF-P0AEA8-F1-model_v2_&_NOBFS_0	ALPHAFOLD	{u'b3368': 1}	93.8601	{u'b3368': {u'A': [True, 93.86010940919037]}}	[u'AF-P0AEA8-F1-model_v2_&_NOBFS_0']	457	1	1	1
AF-P0AEB0-F1-model_v2_&_NOBFS_0	ALPHAFOLD	{u'b2423': 1}	89.8181	{u'b2423': {u'A': [True, 89.81810996563574]}}	[u'AF-P0AEB0-F1-model_v2_&_NOBFS_0']	291	1	1	1
AF-P0AEB2-F1-model_v2_&_NOBFS_0	ALPHAFOLD	{u'b0632': 1}	91.9087	{u'b0632': {u'A': [True, 91.90870967741937]}}	[u'AF-P0AEB2-F1-model_v2_&_NOBFS_0']	403	1	1	1
AF-P0AEB5-F1-model_v2_&_NOBFS_0	ALPHAFOLD	{u'b1330': 1}	91.3531	{u'b1330': {u'A': [True, 91.35309037900875]}}	[u'AF-P0AEB5-F1-model_v2_&_NOBFS_0']	343	1	1	1
AF-P0AEB7-F1-model_v2_&_NOBFS_0	ALPHAFOLD	{u'b1809': 1}	97.9746	{u'b1809': {u'A': [True, 97.97456140350877]}}	[u'AF-P0AEB7-F1-model_v2_&_NOBFS_0']	114	1	1	1
AF-P0AEC0-F1-model_v2_&_NOBFS_0	ALPHAFOLD	{u'b1816': 1}	81.0901	{u'b1816': {u'A': [True, 81.09011583011583]}}	[u'AF-P0AEC0-F1-model_v2_&_NOBFS_0']	518	1	1	1
AF-P0AEC3-F1-model_v2_&_NOBFS_0	ALPHAFOLD	{u'b3210': 1}	81.1931	{u'b3210': {u'A': [True, 81.19314910025707]}}	[u'AF-P0AEC3-F1-model_v2_&_NOBFS_0']	778	1	1	1
AF-P0AEC5-F1-model_v2_&_NOBFS_0	ALPHAFOLD	{u'b2786': 1}	80.3047	{u'b2786': {u'A': [True, 80.3047276688453]}}	[u'AF-P0AEC5-F1-model_v2_&_NOBFS_0']	918	1	1	1
AF-P0AEC8-F1-model_v2_&_NOBFS_0	ALPHAFOLD	{u'b4125': 1}	82.705	{u'b4125': {u'A': [True, 82.70500920810312]}}	[u'AF-P0AEC8-F1-model_v2_&_NOBFS_0']	543	1	1	1
AF-P0AED0-F1-model_v2_&_NOBFS_0	ALPHAFOLD	{u'b3495': 1}	84.5406	{u'b3495': {u'A': [True, 84.54055555555556]}}	[u'AF-P0AED0-F1-model_v2_&_NOBFS_0']	144	1	1	1
AF-P0AED5-F1-model_v2_&_NOBFS_0	ALPHAFOLD	{u'b1914': 1}	91.201	{u'b1914': {u'A': [True, 91.20096330275229]}}	[u'AF-P0AED5-F1-model_v2_&_NOBFS_0']	218	1	1	1
AF-P0AED7-F1-model_v2_&_NOBFS_0	ALPHAFOLD	{u'b2472': 1}	96.5707	{u'b2472': {u'A': [True, 96.57072]}}	[u'AF-P0AED7-F1-model_v2_&_NOBFS_0']	375	1	1	1
AF-P0AED9-F1-model_v2_&_NOBFS_0	ALPHAFOLD	{u'b1961': 1}	90.8264	{u'b1961': {u'A': [True, 90.82637711864407]}}	[u'AF-P0AED9-F1-model_v2_&_NOBFS_0']	472	1	1	1
AF-P0AEE1-F1-model_v2_&_NOBFS_0	ALPHAFOLD	{u'b3472': 1}	83.207	{u'b3472': {u'A': [True, 83.20702702702702]}}	[u'AF-P0AEE1-F1-model_v2_&_NOBFS_0']	185	1	1	1
AF-P0AEE3-F1-model_v2_&_NOBFS_0	ALPHAFOLD	{u'b3235': 1}	87.4801	{u'b3235': {u'A': [True, 87.48005633802816]}}	[u'AF-P0AEE3-F1-model_v2_&_NOBFS_0']	355	1	1	1
AF-P0AEE5-F1-model_v2_&_NOBFS_0	ALPHAFOLD	{u'b2150': 1}	94.287	{u'b2150': {u'A': [True, 94.28698795180723]}}	[u'AF-P0AEE5-F1-model_v2_&_NOBFS_0']	332	1	1	1
AF-P0AEE8-F1-model_v2_&_NOBFS_0	ALPHAFOLD	{u'b3387': 1}	90.4991	{u'b3387': {u'A': [True, 90.49910071942446]}}	[u'AF-P0AEE8-F1-model_v2_&_NOBFS_0']	278	1	1	1
AF-P0AEF0-F1-model_v2_&_NOBFS_0	ALPHAFOLD	{u'b4361': 1}	85.9224	{u'b4361': {u'A': [True, 85.9224081632653]}}	[u'AF-P0AEF0-F1-model_v2_&_NOBFS_0']	245	1	1	1
AF-P0AEF4-F1-model_v2_&_NOBFS_0	ALPHAFOLD	{u'b0620': 1}	86.6247	{u'b0620': {u'A': [True, 86.62469026548675]}}	[u'AF-P0AEF4-F1-model_v2_&_NOBFS_0']	226	1	1	1
AF-P0AEF8-F1-model_v2_&_NOBFS_0	ALPHAFOLD	{u'b3543': 1}	90.2559	{u'b3543': {u'A': [True, 90.25589970501476]}}	[u'AF-P0AEF8-F1-model_v2_&_NOBFS_0']	339	1	1	1
AF-P0AEG1-F1-model_v2_&_NOBFS_0	ALPHAFOLD	{u'b3542': 1}	91.716	{u'b3542': {u'A': [True, 91.71603333333333]}}	[u'AF-P0AEG1-F1-model_v2_&_NOBFS_0']	300	1	1	1
AF-P0AEG4-F1-model_v2_&_NOBFS_0	ALPHAFOLD	{u'b3860': 1}	93.2172	{u'b3860': {u'A': [True, 93.21721153846154]}}	[u'AF-P0AEG4-F1-model_v2_&_NOBFS_0']	208	1	1	1
AF-P0AEG6-F1-model_v2_&_NOBFS_0	ALPHAFOLD	{u'b2893': 1}	91.9974	{u'b2893': {u'A': [True, 91.99737288135591]}}	[u'AF-P0AEG6-F1-model_v2_&_NOBFS_0']	236	1	1	1
AF-P0AEG8-F1-model_v2_&_NOBFS_0	ALPHAFOLD	{u'b1952': 1}	95.4882	{u'b1952': {u'A': [True, 95.4882258064516]}}	[u'AF-P0AEG8-F1-model_v2_&_NOBFS_0']	62	1	1	1
AF-P0AEH1-F1-model_v2_&_NOBFS_0	ALPHAFOLD	{u'b0176': 1}	92.9033	{u'b0176': {u'A': [True, 92.90326666666667]}}	[u'AF-P0AEH1-F1-model_v2_&_NOBFS_0']	450	1	1	1
AF-P0AEH3-F1-model_v2_&_NOBFS_0	ALPHAFOLD	{u'b2267': 1}	94.868	{u'b2267': {u'A': [True, 94.86803921568627]}}	[u'AF-P0AEH3-F1-model_v2_&_NOBFS_0']	153	1	1	1
AF-P0AEH5-F1-model_v2_&_NOBFS_0	ALPHAFOLD	{u'b2266': 1}	66.4017	{u'b2266': {u'A': [True, 66.40168316831684]}}	[u'AF-P0AEH5-F1-model_v2_&_NOBFS_0']	101	1	1	1
AF-P0AEH8-F1-model_v2_&_NOBFS_0	ALPHAFOLD	{u'b4329': 1}	90.4978	{u'b4329': {u'A': [True, 90.49777777777777]}}	[u'AF-P0AEH8-F1-model_v2_&_NOBFS_0']	153	1	1	1
AF-P0AEI1-F1-model_v2_&_NOBFS_0	ALPHAFOLD	{u'b0661': 1}	90.8658	{u'b0661': {u'A': [True, 90.86584388185655]}}	[u'AF-P0AEI1-F1-model_v2_&_NOBFS_0']	474	1	1	1
AF-P0AEI4-F1-model_v2_&_NOBFS_0	ALPHAFOLD	{u'b0835': 1}	93.8146	{u'b0835': {u'A': [True, 93.81455782312925]}}	[u'AF-P0AEI4-F1-model_v2_&_NOBFS_0']	441	1	1	1
AF-P0AEI6-F1-model_v2_&_NOBFS_0	ALPHAFOLD	{u'b1134': 1}	95.7133	{u'b1134': {u'A': [True, 95.71333333333332]}}	[u'AF-P0AEI6-F1-model_v2_&_NOBFS_0']	153	1	1	1
AF-P0AEJ0-F1-model_v2_&_NOBFS_0	ALPHAFOLD	{u'b2686': 1}	89.2855	{u'b2686': {u'A': [True, 89.28550781249999]}}	[u'AF-P0AEJ0-F1-model_v2_&_NOBFS_0']	512	1	1	1
AF-P0AEJ2-F1-model_v2_&_NOBFS_0	ALPHAFOLD	{u'b0593': 1}	94.7759	{u'b0593': {u'A': [True, 94.7758567774936]}}	[u'AF-P0AEJ2-F1-model_v2_&_NOBFS_0']	391	1	1	1
AF-P0AEJ4-F1-model_v2_&_NOBFS_0	ALPHAFOLD	{u'b3404': 1}	81.3488	{u'b3404': {u'A': [True, 81.34875555555556]}}	[u'AF-P0AEJ4-F1-model_v2_&_NOBFS_0']	450	1	1	1
AF-P0AEJ6-F1-model_v2_&_NOBFS_0	ALPHAFOLD	{u'b2441': 1}	97.5007	{u'b2441': {u'A': [True, 97.50070640176601]}}	[u'AF-P0AEJ6-F1-model_v2_&_NOBFS_0']	453	1	1	1
AF-P0AEJ8-F1-model_v2_&_NOBFS_0	ALPHAFOLD	{u'b2456': 1}	95.7156	{u'b2456': {u'A': [True, 95.71557894736846]}}	[u'AF-P0AEJ8-F1-model_v2_&_NOBFS_0']	95	1	1	1
AF-P0AEK0-F1-model_v2_&_NOBFS_0	ALPHAFOLD	{u'b1844': 1}	95.9915	{u'b1844': {u'A': [True, 95.99154545454545]}}	[u'AF-P0AEK0-F1-model_v2_&_NOBFS_0']	220	1	1	1
AF-P0AEK2-F1-model_v2_&_NOBFS_0	ALPHAFOLD	{u'b1093': 1}	97.3409	{u'b1093': {u'A': [True, 97.34090163934428]}}	[u'AF-P0AEK2-F1-model_v2_&_NOBFS_0']	244	1	1	1
AF-P0AEK4-F1-model_v2_&_NOBFS_0	ALPHAFOLD	{u'b1288': 1}	96.155	{u'b1288': {u'A': [True, 96.15503816793893]}}	[u'AF-P0AEK4-F1-model_v2_&_NOBFS_0']	262	1	1	1
AF-P0AEK7-F1-model_v2_&_NOBFS_0	ALPHAFOLD	{u'b1476': 1}	95.3642	{u'b1476': {u'A': [True, 95.3642396313364]}}	[u'AF-P0AEK7-F1-model_v2_&_NOBFS_0']	217	1	1	1
AF-P0AEL0-F1-model_v2_&_NOBFS_0	ALPHAFOLD	{u'b3892': 1}	94.1228	{u'b3892': {u'A': [True, 94.12284360189572]}}	[u'AF-P0AEL0-F1-model_v2_&_NOBFS_0']	211	1	1	1
AF-P0AEL3-F1-model_v2_&_NOBFS_0	ALPHAFOLD	{u'b3408': 1}	84.2107	{u'b3408': {u'A': [True, 84.21066666666667]}}	[u'AF-P0AEL3-F1-model_v2_&_NOBFS_0']	75	1	1	1
AF-P0AEL6-F1-model_v2_&_NOBFS_0	ALPHAFOLD	{u'b0592': 1}	90.9005	{u'b0592': {u'A': [True, 90.9005031446541]}}	[u'AF-P0AEL6-F1-model_v2_&_NOBFS_0']	318	1	1	1
AF-P0AEL8-F1-model_v2_&_NOBFS_0	ALPHAFOLD	{u'b0535': 1}	88.6645	{u'b0535': {u'A': [True, 88.6645238095238]}}	[u'AF-P0AEL8-F1-model_v2_&_NOBFS_0']	210	1	1	1
AF-P0AEM0-F1-model_v2_&_NOBFS_0	ALPHAFOLD	{u'b0028': 1}	81.1267	{u'b0028': {u'A': [True, 81.12671140939598]}}	[u'AF-P0AEM0-F1-model_v2_&_NOBFS_0']	149	1	1	1
AF-P0AEM4-F1-model_v2_&_NOBFS_0	ALPHAFOLD	{u'b1071': 1}	71.0809	{u'b1071': {u'A': [True, 71.08092783505154]}}	[u'AF-P0AEM4-F1-model_v2_&_NOBFS_0']	97	1	1	1
AF-P0AEM6-F1-model_v2_&_NOBFS_0	ALPHAFOLD	{u'b1922': 1}	79.1606	{u'b1922': {u'A': [True, 79.16058577405857]}}	[u'AF-P0AEM6-F1-model_v2_&_NOBFS_0']	239	1	1	1
AF-P0AEM9-F1-model_v2_&_NOBFS_0	ALPHAFOLD	{u'b1920': 1}	90.5124	{u'b1920': {u'A': [True, 90.51236842105263]}}	[u'AF-P0AEM9-F1-model_v2_&_NOBFS_0']	266	1	1	1
AF-P0AEN1-F1-model_v2_&_NOBFS_0	ALPHAFOLD	{u'b3844': 1}	96.165	{u'b3844': {u'A': [True, 96.16502145922746]}}	[u'AF-P0AEN1-F1-model_v2_&_NOBFS_0']	233	1	1	1
AF-P0AEN4-F1-model_v2_&_NOBFS_0	ALPHAFOLD	{u'b0083': 1}	78.9861	{u'b0083': {u'A': [True, 78.98611570247934]}}	[u'AF-P0AEN4-F1-model_v2_&_NOBFS_0']	121	1	1	1
AF-P0AEN8-F1-model_v2_&_NOBFS_0	ALPHAFOLD	{u'b2804': 1}	97.1686	{u'b2804': {u'A': [True, 97.16857142857141]}}	[u'AF-P0AEN8-F1-model_v2_&_NOBFS_0']	140	1	1	1
AF-P0AEP1-F1-model_v2_&_NOBFS_0	ALPHAFOLD	{u'b2943': 1}	88.5682	{u'b2943': {u'A': [True, 88.56821120689654]}}	[u'AF-P0AEP1-F1-model_v2_&_NOBFS_0']	464	1	1	1
AF-P0AEP3-F1-model_v2_&_NOBFS_0	ALPHAFOLD	{u'b1236': 1}	95.0801	{u'b1236': {u'A': [True, 95.08006622516557]}}	[u'AF-P0AEP3-F1-model_v2_&_NOBFS_0']	302	1	1	1
AF-P0AEP7-F1-model_v2_&_NOBFS_0	ALPHAFOLD	{u'b0507': 1}	97.2886	{u'b0507': {u'A': [True, 97.28861720067454]}}	[u'AF-P0AEP7-F1-model_v2_&_NOBFS_0']	593	1	1	1
AF-P0AEP9-F1-model_v2_&_NOBFS_0	ALPHAFOLD	{u'b2979': 1}	95.0749	{u'b2979': {u'A': [True, 95.07490981963926]}}	[u'AF-P0AEP9-F1-model_v2_&_NOBFS_0']	499	1	1	1
AF-P0AEQ1-F1-model_v2_&_NOBFS_0	ALPHAFOLD	{u'b2977': 1}	96.6539	{u'b2977': {u'A': [True, 96.65388059701492]}}	[u'AF-P0AEQ1-F1-model_v2_&_NOBFS_0']	134	1	1	1
AF-P0AEQ3-F1-model_v2_&_NOBFS_0	ALPHAFOLD	{u'b0811': 1}	92.4527	{u'b0811': {u'A': [True, 92.4526612903226]}}	[u'AF-P0AEQ3-F1-model_v2_&_NOBFS_0']	248	1	1	1
AF-P0AEQ6-F1-model_v2_&_NOBFS_0	ALPHAFOLD	{u'b0810': 1}	94.0487	{u'b0810': {u'A': [True, 94.04867579908674]}}	[u'AF-P0AEQ6-F1-model_v2_&_NOBFS_0']	219	1	1	1
AF-P0AER0-F1-model_v2_&_NOBFS_0	ALPHAFOLD	{u'b3927': 1}	93.3397	{u'b3927': {u'A': [True, 93.33967971530248]}}	[u'AF-P0AER0-F1-model_v2_&_NOBFS_0']	281	1	1	1
AF-P0AER3-F1-model_v2_&_NOBFS_0	ALPHAFOLD	{u'b0654': 1}	93.8631	{u'b0654': {u'A': [True, 93.86313008130082]}}	[u'AF-P0AER3-F1-model_v2_&_NOBFS_0']	246	1	1	1
AF-P0AER5-F1-model_v2_&_NOBFS_0	ALPHAFOLD	{u'b0653': 1}	93.2817	{u'b0653': {u'A': [True, 93.28169642857142]}}	[u'AF-P0AER5-F1-model_v2_&_NOBFS_0']	224	1	1	1
AF-P0AER8-F1-model_v2_&_NOBFS_0	ALPHAFOLD	{u'b3653': 1}	89.8024	{u'b3653': {u'A': [True, 89.80241895261845]}}	[u'AF-P0AER8-F1-model_v2_&_NOBFS_0']	401	1	1	1
AF-P0AES0-F1-model_v2_&_NOBFS_0	ALPHAFOLD	{u'b2988': 1}	95.1669	{u'b2988': {u'A': [True, 95.16686591276252]}}	[u'AF-P0AES0-F1-model_v2_&_NOBFS_0']	619	1	1	1
AF-P0AES2-F1-model_v2_&_NOBFS_0	ALPHAFOLD	{u'b2787': 1}	97.8806	{u'b2787': {u'A': [True, 97.88060538116592]}}	[u'AF-P0AES2-F1-model_v2_&_NOBFS_0']	446	1	1	1
AF-P0AES4-F1-model_v2_&_NOBFS_0	ALPHAFOLD	{u'b2231': 1}	87.0571	{u'b2231': {u'A': [True, 87.05712000000001]}}	[u'AF-P0AES4-F1-model_v2_&_NOBFS_0']	875	1	1	1
AF-P0AES6-F1-model_v2_&_NOBFS_0	ALPHAFOLD	{u'b3699': 1}	87.6873	{u'b3699': {u'A': [True, 87.68725124378108]}}	[u'AF-P0AES6-F1-model_v2_&_NOBFS_0']	804	1	1	1
AF-P0AES9-F1-model_v2_&_NOBFS_0	ALPHAFOLD	{u'b3510': 1}	81.7085	{u'b3510': {u'A': [True, 81.70854545454546]}}	[u'AF-P0AES9-F1-model_v2_&_NOBFS_0']	110	1	1	1
AF-P0AET2-F1-model_v2_&_NOBFS_0	ALPHAFOLD	{u'b3509': 1}	71.9332	{u'b3509': {u'A': [True, 71.93324074074074]}}	[u'AF-P0AET2-F1-model_v2_&_NOBFS_0']	108	1	1	1
AF-P0AET5-F1-model_v2_&_NOBFS_0	ALPHAFOLD	{u'b3511': 1}	91.6516	{u'b3511': {u'A': [True, 91.65157894736844]}}	[u'AF-P0AET5-F1-model_v2_&_NOBFS_0']	190	1	1	1
AF-P0AET8-F1-model_v2_&_NOBFS_0	ALPHAFOLD	{u'b1619': 1}	97.3008	{u'b1619': {u'A': [True, 97.30082352941176]}}	[u'AF-P0AET8-F1-model_v2_&_NOBFS_0']	255	1	1	1
AF-P0AEU0-F1-model_v2_&_NOBFS_0	ALPHAFOLD	{u'b2309': 1}	93.7968	{u'b2309': {u'A': [True, 93.79676923076923]}}	[u'AF-P0AEU0-F1-model_v2_&_NOBFS_0']	260	1	1	1
AF-P0AEU3-F1-model_v2_&_NOBFS_0	ALPHAFOLD	{u'b2307': 1}	90.4657	{u'b2307': {u'A': [True, 90.46567226890755]}}	[u'AF-P0AEU3-F1-model_v2_&_NOBFS_0']	238	1	1	1
AF-P0AEU7-F1-model_v2_&_NOBFS_0	ALPHAFOLD	{u'b0178': 1}	91.1698	{u'b0178': {u'A': [True, 91.16975155279503]}}	[u'AF-P0AEU7-F1-model_v2_&_NOBFS_0']	161	1	1	1
AF-P0AEV1-F1-model_v2_&_NOBFS_0	ALPHAFOLD	{u'b1235': 1}	84.9777	{u'b1235': {u'A': [True, 84.97765578635016]}}	[u'AF-P0AEV1-F1-model_v2_&_NOBFS_0']	337	1	1	1
AF-P0AEV4-F1-model_v2_&_NOBFS_0	ALPHAFOLD	{u'b2725': 1}	88.2848	{u'b2725': {u'A': [True, 88.28477124183006]}}	[u'AF-P0AEV4-F1-model_v2_&_NOBFS_0']	153	1	1	1
AF-P0AEV7-F1-model_v2_&_NOBFS_0	ALPHAFOLD	{u'b2718': 1}	80.6491	{u'b2718': {u'A': [True, 80.64911764705883]}}	[u'AF-P0AEV7-F1-model_v2_&_NOBFS_0']	136	1	1	1
AF-P0AEV9-F1-model_v2_&_NOBFS_0	ALPHAFOLD	{u'b2717': 1}	89.8056	{u'b2717': {u'A': [True, 89.80564102564102]}}	[u'AF-P0AEV9-F1-model_v2_&_NOBFS_0']	156	1	1	1
AF-P0AEW1-F1-model_v2_&_NOBFS_0	ALPHAFOLD	{u'b2485': 1}	90.9994	{u'b2485': {u'A': [True, 90.99935185185186]}}	[u'AF-P0AEW1-F1-model_v2_&_NOBFS_0']	216	1	1	1
AF-P0AEW4-F1-model_v2_&_NOBFS_0	ALPHAFOLD	{u'b3032': 1}	95.3111	{u'b3032': {u'A': [True, 95.31112727272728]}}	[u'AF-P0AEW4-F1-model_v2_&_NOBFS_0']	275	1	1	1
AF-P0AEW6-F1-model_v2_&_NOBFS_0	ALPHAFOLD	{u'b0477': 1}	88.7745	{u'b0477': {u'A': [True, 88.77453917050691]}}	[u'AF-P0AEW6-F1-model_v2_&_NOBFS_0']	434	1	1	1
AF-P0AEW9-F1-model_v2_&_NOBFS_0	ALPHAFOLD	{u'b2168': 1}	94.581	{u'b2168': {u'A': [True, 94.58099358974358]}}	[u'AF-P0AEW9-F1-model_v2_&_NOBFS_0']	312	1	1	1
AF-P0AEX3-F1-model_v2_&_NOBFS_0	ALPHAFOLD	{u'b2587': 1}	86.829	{u'b2587': {u'A': [True, 86.82898148148148]}}	[u'AF-P0AEX3-F1-model_v2_&_NOBFS_0']	432	1	1	1
AF-P0AEX5-F1-model_v2_&_NOBFS_0	ALPHAFOLD	{u'b3355': 1}	93.1254	{u'b3355': {u'A': [True, 93.12536332179931]}}	[u'AF-P0AEX5-F1-model_v2_&_NOBFS_0']	289	1	1	1
AF-P0AEX7-F1-model_v2_&_NOBFS_0	ALPHAFOLD	{u'b3457': 1}	89.1162	{u'b3457': {u'A': [True, 89.11623376623378]}}	[u'AF-P0AEX7-F1-model_v2_&_NOBFS_0']	308	1	1	1
AF-P0AEX9-F1-model_v2_&_NOBFS_0	ALPHAFOLD	{u'b4034': 1}	94.4593	{u'b4034': {u'A': [True, 94.45929292929293]}}	[u'AF-P0AEX9-F1-model_v2_&_NOBFS_0']	396	1	1	1
AF-P0AEY1-F1-model_v2_&_NOBFS_0	ALPHAFOLD	{u'b1529': 1}	83.3462	{u'b1529': {u'A': [True, 83.34615384615384]}}	[u'AF-P0AEY1-F1-model_v2_&_NOBFS_0']	221	1	1	1
AF-P0AEY3-F1-model_v2_&_NOBFS_0	ALPHAFOLD	{u'b2781': 1}	94.237	{u'b2781': {u'A': [True, 94.23695817490494]}}	[u'AF-P0AEY3-F1-model_v2_&_NOBFS_0']	263	1	1	1
AF-P0AEY5-F1-model_v2_&_NOBFS_0	ALPHAFOLD	{u'b3028': 1}	97.5478	{u'b3028': {u'A': [True, 97.54782383419688]}}	[u'AF-P0AEY5-F1-model_v2_&_NOBFS_0']	193	1	1	1
AF-P0AEY8-F1-model_v2_&_NOBFS_0	ALPHAFOLD	{u'b0842': 1}	93.0895	{u'b0842': {u'A': [True, 93.08946341463415]}}	[u'AF-P0AEY8-F1-model_v2_&_NOBFS_0']	410	1	1	1
AF-P0AEZ1-F1-model_v2_&_NOBFS_0	ALPHAFOLD	{u'b3941': 1}	95.1526	{u'b3941': {u'A': [True, 95.15263513513514]}}	[u'AF-P0AEZ1-F1-model_v2_&_NOBFS_0']	296	1	1	1
AF-P0AEZ3-F1-model_v2_&_NOBFS_0	ALPHAFOLD	{u'b1175': 1}	94.1457	{u'b1175': {u'A': [True, 94.14574074074073]}}	[u'AF-P0AEZ3-F1-model_v2_&_NOBFS_0']	270	1	1	1
AF-P0AEZ7-F1-model_v2_&_NOBFS_0	ALPHAFOLD	{u'b0211': 1}	79.8402	{u'b0211': {u'A': [True, 79.84019911504426]}}	[u'AF-P0AEZ7-F1-model_v2_&_NOBFS_0']	452	1	1	1
AF-P0AEZ9-F1-model_v2_&_NOBFS_0	ALPHAFOLD	{u'b0782': 1}	97.4961	{u'b0782': {u'A': [True, 97.4960588235294]}}	[u'AF-P0AEZ9-F1-model_v2_&_NOBFS_0']	170	1	1	1
AF-P0AF01-F1-model_v2_&_NOBFS_0	ALPHAFOLD	{u'b0764': 1}	92.9154	{u'b0764': {u'A': [True, 92.91537117903931]}}	[u'AF-P0AF01-F1-model_v2_&_NOBFS_0']	229	1	1	1
AF-P0AF03-F1-model_v2_&_NOBFS_0	ALPHAFOLD	{u'b0009': 1}	96.0216	{u'b0009': {u'A': [True, 96.02158974358974]}}	[u'AF-P0AF03-F1-model_v2_&_NOBFS_0']	195	1	1	1
AF-P0AF06-F1-model_v2_&_NOBFS_0	ALPHAFOLD	{u'b1889': 1}	80.5062	{u'b1889': {u'A': [True, 80.50620129870131]}}	[u'AF-P0AF06-F1-model_v2_&_NOBFS_0']	308	1	1	1
AF-P0AF08-F1-model_v2_&_NOBFS_0	ALPHAFOLD	{u'b2113': 1}	91.6373	{u'b2113': {u'A': [True, 91.63728997289974]}}	[u'AF-P0AF08-F1-model_v2_&_NOBFS_0']	369	1	1	1
AF-P0AF10-F1-model_v2_&_NOBFS_0	ALPHAFOLD	{u'b3601': 1}	89.157	{u'b3601': {u'A': [True, 89.15697435897437]}}	[u'AF-P0AF10-F1-model_v2_&_NOBFS_0']	195	1	1	1
AF-P0AF12-F1-model_v2_&_NOBFS_0	ALPHAFOLD	{u'b0159': 1}	95.9928	{u'b0159': {u'A': [True, 95.99275862068966]}}	[u'AF-P0AF12-F1-model_v2_&_NOBFS_0']	232	1	1	1
AF-P0AF16-F1-model_v2_&_NOBFS_0	ALPHAFOLD	{u'b1069': 1}	89.8891	{u'b1069': {u'A': [True, 89.88908023483364]}}	[u'AF-P0AF16-F1-model_v2_&_NOBFS_0']	511	1	1	1
AF-P0AF18-F1-model_v2_&_NOBFS_0	ALPHAFOLD	{u'b0677': 1}	98.4208	{u'b0677': {u'A': [True, 98.42078534031413]}}	[u'AF-P0AF18-F1-model_v2_&_NOBFS_0']	382	1	1	1
AF-P0AF20-F1-model_v2_&_NOBFS_0	ALPHAFOLD	{u'b0676': 1}	93.5196	{u'b0676': {u'A': [True, 93.51955665024629]}}	[u'AF-P0AF20-F1-model_v2_&_NOBFS_0']	406	1	1	1
AF-P0AF24-F1-model_v2_&_NOBFS_0	ALPHAFOLD	{u'b0675': 1}	97.1217	{u'b0675': {u'A': [True, 97.12168]}}	[u'AF-P0AF24-F1-model_v2_&_NOBFS_0']	250	1	1	1
AF-P0AF26-F1-model_v2_&_NOBFS_0	ALPHAFOLD	{u'b1226': 1}	85.4721	{u'b1226': {u'A': [True, 85.4721186440678]}}	[u'AF-P0AF26-F1-model_v2_&_NOBFS_0']	236	1	1	1
AF-P0AF28-F1-model_v2_&_NOBFS_0	ALPHAFOLD	{u'b1221': 1}	89.9983	{u'b1221': {u'A': [True, 89.99828703703703]}}	[u'AF-P0AF28-F1-model_v2_&_NOBFS_0']	216	1	1	1
AF-P0AF32-F1-model_v2_&_NOBFS_0	ALPHAFOLD	{u'b1465': 1}	96.4372	{u'b1465': {u'A': [True, 96.43721238938052]}}	[u'AF-P0AF32-F1-model_v2_&_NOBFS_0']	226	1	1	1
AF-P0AF34-F1-model_v2_&_NOBFS_0	ALPHAFOLD	{u'b3921': 1}	83.7883	{u'b3921': {u'A': [True, 83.78828767123288]}}	[u'AF-P0AF34-F1-model_v2_&_NOBFS_0']	146	1	1	1
AF-P0AF36-F1-model_v2_&_NOBFS_0	ALPHAFOLD	{u'b3928': 1}	96.0717	{u'b3928': {u'A': [True, 96.07172839506174]}}	[u'AF-P0AF36-F1-model_v2_&_NOBFS_0']	81	1	1	1
AF-P0AF40-F1-model_v2_&_NOBFS_0	ALPHAFOLD	{u'b3964': 1}	89.2126	{u'b3964': {u'A': [True, 89.2126050420168]}}	[u'AF-P0AF40-F1-model_v2_&_NOBFS_0']	119	1	1	1
AF-P0AF43-F1-model_v2_&_NOBFS_0	ALPHAFOLD	{u'b4020': 1}	89.4896	{u'b4020': {u'A': [True, 89.48963167587478]}}	[u'AF-P0AF43-F1-model_v2_&_NOBFS_0']	543	1	1	1
AF-P0AF45-F1-model_v2_&_NOBFS_0	ALPHAFOLD	{u'b4026': 1}	53.8811	{u'b4026': {u'A': [True, 53.881125]}}	[u'AF-P0AF45-F1-model_v2_&_NOBFS_0']	80	1	1	1
AF-P0AF48-F1-model_v2_&_NOBFS_0	ALPHAFOLD	{u'b4056': 1}	97.4928	{u'b4056': {u'A': [True, 97.49282608695653]}}	[u'AF-P0AF48-F1-model_v2_&_NOBFS_0']	138	1	1	1
AF-P0AF50-F1-model_v2_&_NOBFS_0	ALPHAFOLD	{u'b4057': 1}	91.687	{u'b4057': {u'A': [True, 91.68703389830506]}}	[u'AF-P0AF50-F1-model_v2_&_NOBFS_0']	118	1	1	1
AF-P0AF52-F1-model_v2_&_NOBFS_0	ALPHAFOLD	{u'b4064': 1}	82.7543	{u'b4064': {u'A': [True, 82.75427616926503]}}	[u'AF-P0AF52-F1-model_v2_&_NOBFS_0']	449	1	1	1
AF-P0AF54-F1-model_v2_&_NOBFS_0	ALPHAFOLD	{u'b4068': 1}	80.1453	{u'b4068': {u'A': [True, 80.14528846153847]}}	[u'AF-P0AF54-F1-model_v2_&_NOBFS_0']	104	1	1	1
AF-P0AF56-F1-model_v2_&_NOBFS_0	ALPHAFOLD	{u'b4078': 1}	93.6413	{u'b4078': {u'A': [True, 93.64131004366813]}}	[u'AF-P0AF56-F1-model_v2_&_NOBFS_0']	229	1	1	1
AF-P0AF59-F1-model_v2_&_NOBFS_0	ALPHAFOLD	{u'b4126': 1}	92.8587	{u'b4126': {u'A': [True, 92.85868421052632]}}	[u'AF-P0AF59-F1-model_v2_&_NOBFS_0']	76	1	1	1
AF-P0AF61-F1-model_v2_&_NOBFS_0	ALPHAFOLD	{u'b4128': 1}	88.0544	{u'b4128': {u'A': [True, 88.05438775510204]}}	[u'AF-P0AF61-F1-model_v2_&_NOBFS_0']	98	1	1	1
AF-P0AF63-F1-model_v2_&_NOBFS_0	ALPHAFOLD	{u'b4178': 1}	94.904	{u'b4178': {u'A': [True, 94.90397163120568]}}	[u'AF-P0AF63-F1-model_v2_&_NOBFS_0']	141	1	1	1
AF-P0AF67-F1-model_v2_&_NOBFS_0	ALPHAFOLD	{u'b4168': 1}	94.6871	{u'b4168': {u'A': [True, 94.68705882352941]}}	[u'AF-P0AF67-F1-model_v2_&_NOBFS_0']	153	1	1	1
AF-P0AF70-F1-model_v2_&_NOBFS_0	ALPHAFOLD	{u'b4144': 1}	67.9504	{u'b4144': {u'A': [True, 67.95042735042735]}}	[u'AF-P0AF70-F1-model_v2_&_NOBFS_0']	117	1	1	1
AF-P0AF73-F1-model_v2_&_NOBFS_0	ALPHAFOLD	{u'b4176': 1}	90.1331	{u'b4176': {u'A': [True, 90.13307692307693]}}	[u'AF-P0AF73-F1-model_v2_&_NOBFS_0']	65	1	1	1
AF-P0AF76-F1-model_v2_&_NOBFS_0	ALPHAFOLD	{u'b4181': 1}	94.6656	{u'b4181': {u'A': [True, 94.66563909774435]}}	[u'AF-P0AF76-F1-model_v2_&_NOBFS_0']	133	1	1	1
AF-P0AF78-F1-model_v2_&_NOBFS_0	ALPHAFOLD	{u'b4182': 1}	76.8671	{u'b4182': {u'A': [True, 76.86711206896553]}}	[u'AF-P0AF78-F1-model_v2_&_NOBFS_0']	232	1	1	1
AF-P0AF80-F1-model_v2_&_NOBFS_0	ALPHAFOLD	{u'b4184': 1}	88.3654	{u'b4184': {u'A': [True, 88.3653787878788]}}	[u'AF-P0AF80-F1-model_v2_&_NOBFS_0']	132	1	1	1
AF-P0AF82-F1-model_v2_&_NOBFS_0	ALPHAFOLD	{u'b4188': 1}	81.6111	{u'b4188': {u'A': [True, 81.61109890109891]}}	[u'AF-P0AF82-F1-model_v2_&_NOBFS_0']	91	1	1	1
AF-P0AF86-F1-model_v2_&_NOBFS_0	ALPHAFOLD	{u'b4199': 1}	87.2173	{u'b4199': {u'A': [True, 87.21725274725276]}}	[u'AF-P0AF86-F1-model_v2_&_NOBFS_0']	91	1	1	1
AF-P0AF90-F1-model_v2_&_NOBFS_0	ALPHAFOLD	{u'b4255': 1}	87.6741	{u'b4255': {u'A': [True, 87.67405797101449]}}	[u'AF-P0AF90-F1-model_v2_&_NOBFS_0']	138	1	1	1
AF-P0AF93-F1-model_v2_&_NOBFS_0	ALPHAFOLD	{u'b4243': 1}	97.8188	{u'b4243': {u'A': [True, 97.818828125]}}	[u'AF-P0AF93-F1-model_v2_&_NOBFS_0']	128	1	1	1
AF-P0AF96-F1-model_v2_&_NOBFS_0	ALPHAFOLD	{u'b4252': 1}	97.5729	{u'b4252': {u'A': [True, 97.57293333333332]}}	[u'AF-P0AF96-F1-model_v2_&_NOBFS_0']	150	1	1	1
AF-P0AF98-F1-model_v2_&_NOBFS_0	ALPHAFOLD	{u'b4261': 1}	83.7652	{u'b4261': {u'A': [True, 83.76524590163933]}}	[u'AF-P0AF98-F1-model_v2_&_NOBFS_0']	366	1	1	1
AF-P0AFA2-F1-model_v2_&_NOBFS_0	ALPHAFOLD	{u'b1222': 1}	83.9922	{u'b1222': {u'A': [True, 83.99222408026756]}}	[u'AF-P0AFA2-F1-model_v2_&_NOBFS_0']	598	1	1	1
AF-P0AFA5-F1-model_v2_&_NOBFS_0	ALPHAFOLD	{u'b0569': 1}	85.0768	{u'b0569': {u'A': [True, 85.07677852348993]}}	[u'AF-P0AFA5-F1-model_v2_&_NOBFS_0']	745	1	1	1
AF-P0AFA7-F1-model_v2_&_NOBFS_0	ALPHAFOLD	{u'b1186': 1}	90.7021	{u'b1186': {u'A': [True, 90.70212475633527]}}	[u'AF-P0AFA7-F1-model_v2_&_NOBFS_0']	513	1	1	1
AF-P0AFA9-F1-model_v2_&_NOBFS_0	ALPHAFOLD	{u'b3478': 1}	91.7347	{u'b3478': {u'A': [True, 91.73469314079422]}}	[u'AF-P0AFA9-F1-model_v2_&_NOBFS_0']	277	1	1	1
AF-P0AFB1-F1-model_v2_&_NOBFS_0	ALPHAFOLD	{u'b3163': 1}	91.6303	{u'b3163': {u'A': [True, 91.63030612244899]}}	[u'AF-P0AFB1-F1-model_v2_&_NOBFS_0']	294	1	1	1
AF-P0AFB5-F1-model_v2_&_NOBFS_0	ALPHAFOLD	{u'b3869': 1}	89.9049	{u'b3869': {u'A': [True, 89.90489971346705]}}	[u'AF-P0AFB5-F1-model_v2_&_NOBFS_0']	349	1	1	1
AF-P0AFB8-F1-model_v2_&_NOBFS_0	ALPHAFOLD	{u'b3868': 1}	86.3006	{u'b3868': {u'A': [True, 86.30057569296376]}}	[u'AF-P0AFB8-F1-model_v2_&_NOBFS_0']	469	1	1	1
AF-P0AFC0-F1-model_v2_&_NOBFS_0	ALPHAFOLD	{u'b1865': 1}	95.5849	{u'b1865': {u'A': [True, 95.58486666666667]}}	[u'AF-P0AFC0-F1-model_v2_&_NOBFS_0']	150	1	1	1
AF-P0AFC3-F1-model_v2_&_NOBFS_0	ALPHAFOLD	{u'b2288': 1}	81.261	{u'b2288': {u'A': [True, 81.26095238095239]}}	[u'AF-P0AFC3-F1-model_v2_&_NOBFS_0']	147	1	1	1
AF-P0AFC7-F1-model_v2_&_NOBFS_0	ALPHAFOLD	{u'b2287': 1}	85.9411	{u'b2287': {u'A': [True, 85.9410909090909]}}	[u'AF-P0AFC7-F1-model_v2_&_NOBFS_0']	220	1	1	1
AF-P0AFD1-F1-model_v2_&_NOBFS_0	ALPHAFOLD	{u'b2285': 1}	93.0551	{u'b2285': {u'A': [True, 93.05506024096385]}}	[u'AF-P0AFD1-F1-model_v2_&_NOBFS_0']	166	1	1	1
AF-P0AFD4-F1-model_v2_&_NOBFS_0	ALPHAFOLD	{u'b2282': 1}	88.8463	{u'b2282': {u'A': [True, 88.84627692307693]}}	[u'AF-P0AFD4-F1-model_v2_&_NOBFS_0']	325	1	1	1
AF-P0AFD6-F1-model_v2_&_NOBFS_0	ALPHAFOLD	{u'b2281': 1}	93.8473	{u'b2281': {u'A': [True, 93.84733333333334]}}	[u'AF-P0AFD6-F1-model_v2_&_NOBFS_0']	180	1	1	1
AF-P0AFE0-F1-model_v2_&_NOBFS_0	ALPHAFOLD	{u'b2280': 1}	86.532	{u'b2280': {u'A': [True, 86.53195652173913]}}	[u'AF-P0AFE0-F1-model_v2_&_NOBFS_0']	184	1	1	1
AF-P0AFE4-F1-model_v2_&_NOBFS_0	ALPHAFOLD	{u'b2279': 1}	95.0018	{u'b2279': {u'A': [True, 95.0018]}}	[u'AF-P0AFE4-F1-model_v2_&_NOBFS_0']	100	1	1	1
AF-P0AFE8-F1-model_v2_&_NOBFS_0	ALPHAFOLD	{u'b2277': 1}	93.7975	{u'b2277': {u'A': [True, 93.7975442043222]}}	[u'AF-P0AFE8-F1-model_v2_&_NOBFS_0']	509	1	1	1
AF-P0AFF0-F1-model_v2_&_NOBFS_0	ALPHAFOLD	{u'b2276': 1}	94.268	{u'b2276': {u'A': [True, 94.268]}}	[u'AF-P0AFF0-F1-model_v2_&_NOBFS_0']	485	1	1	1
AF-P0AFF2-F1-model_v2_&_NOBFS_0	ALPHAFOLD	{u'b2393': 1}	91.2782	{u'b2393': {u'A': [True, 91.27824999999999]}}	[u'AF-P0AFF2-F1-model_v2_&_NOBFS_0']	400	1	1	1
AF-P0AFF4-F1-model_v2_&_NOBFS_0	ALPHAFOLD	{u'b2964': 1}	91.175	{u'b2964': {u'A': [True, 91.17495215311006]}}	[u'AF-P0AFF4-F1-model_v2_&_NOBFS_0']	418	1	1	1
AF-P0AFF6-F1-model_v2_&_NOBFS_0	ALPHAFOLD	{u'b3169': 1}	86.6594	{u'b3169': {u'A': [True, 86.65935353535355]}}	[u'AF-P0AFF6-F1-model_v2_&_NOBFS_0']	495	1	1	1
AF-P0AFG0-F1-model_v2_&_NOBFS_0	ALPHAFOLD	{u'b3982': 1}	74.0596	{u'b3982': {u'A': [True, 74.05955801104972]}}	[u'AF-P0AFG0-F1-model_v2_&_NOBFS_0']	181	1	1	1
AF-P0AFG3-F1-model_v2_&_NOBFS_0	ALPHAFOLD	{u'b0726': 1}	93.8177	{u'b0726': {u'A': [True, 93.81766345123259]}}	[u'AF-P0AFG3-F1-model_v2_&_NOBFS_0']	933	1	1	1
AF-P0AFG6-F1-model_v2_&_NOBFS_0	ALPHAFOLD	{u'b0727': 1}	85.3897	{u'b0727': {u'A': [True, 85.3897037037037]}}	[u'AF-P0AFG6-F1-model_v2_&_NOBFS_0']	405	1	1	1
AF-P0AFG8-F1-model_v2_&_NOBFS_0	ALPHAFOLD	{u'b0114': 1}	96.0422	{u'b0114': {u'A': [True, 96.04223224351746]}}	[u'AF-P0AFG8-F1-model_v2_&_NOBFS_0']	887	1	1	1
AF-P0AFH0-F1-model_v2_&_NOBFS_0	ALPHAFOLD	{u'b1335': 1}	95.2561	{u'b1335': {u'A': [True, 95.25614035087719]}}	[u'AF-P0AFH0-F1-model_v2_&_NOBFS_0']	171	1	1	1
AF-P0AFH2-F1-model_v2_&_NOBFS_0	ALPHAFOLD	{u'b1244': 1}	89.9358	{u'b1244': {u'A': [True, 89.93578431372549]}}	[u'AF-P0AFH2-F1-model_v2_&_NOBFS_0']	306	1	1	1
AF-P0AFH6-F1-model_v2_&_NOBFS_0	ALPHAFOLD	{u'b1245': 1}	88.5159	{u'b1245': {u'A': [True, 88.51586092715232]}}	[u'AF-P0AFH6-F1-model_v2_&_NOBFS_0']	302	1	1	1
AF-P0AFH8-F1-model_v2_&_NOBFS_0	ALPHAFOLD	{u'b4376': 1}	81.6487	{u'b4376': {u'A': [True, 81.64865671641792]}}	[u'AF-P0AFH8-F1-model_v2_&_NOBFS_0']	201	1	1	1
AF-P0AFI0-F1-model_v2_&_NOBFS_0	ALPHAFOLD	{u'b2373': 1}	96.8342	{u'b2373': {u'A': [True, 96.83418439716311]}}	[u'AF-P0AFI0-F1-model_v2_&_NOBFS_0']	564	1	1	1
AF-P0AFI2-F1-model_v2_&_NOBFS_0	ALPHAFOLD	{u'b3019': 1}	93.3064	{u'b3019': {u'A': [True, 93.3064494680851]}}	[u'AF-P0AFI2-F1-model_v2_&_NOBFS_0']	752	1	1	1
AF-P0AFI5-F1-model_v2_&_NOBFS_0	ALPHAFOLD	{u'b2134': 1}	90.6713	{u'b2134': {u'A': [True, 90.67132258064517]}}	[u'AF-P0AFI5-F1-model_v2_&_NOBFS_0']	310	1	1	1
AF-P0AFI7-F1-model_v2_&_NOBFS_0	ALPHAFOLD	{u'b1638': 1}	94.7253	{u'b1638': {u'A': [True, 94.72532110091744]}}	[u'AF-P0AFI7-F1-model_v2_&_NOBFS_0']	218	1	1	1
AF-P0AFI9-F1-model_v2_&_NOBFS_0	ALPHAFOLD	{u'b2493': 1}	85.4486	{u'b2493': {u'A': [True, 85.4486402266289]}}	[u'AF-P0AFI9-F1-model_v2_&_NOBFS_0']	353	1	1	1
AF-P0AFJ1-F1-model_v2_&_NOBFS_0	ALPHAFOLD	{u'b4108': 1}	78.9314	{u'b4108': {u'A': [True, 78.93135135135137]}}	[u'AF-P0AFJ1-F1-model_v2_&_NOBFS_0']	111	1	1	1
AF-P0AFJ5-F1-model_v2_&_NOBFS_0	ALPHAFOLD	{u'b0399': 1}	87.6796	{u'b0399': {u'A': [True, 87.6795633187773]}}	[u'AF-P0AFJ5-F1-model_v2_&_NOBFS_0']	229	1	1	1
AF-P0AFJ7-F1-model_v2_&_NOBFS_0	ALPHAFOLD	{u'b3493': 1}	87.2099	{u'b3493': {u'A': [True, 87.2099398797595]}}	[u'AF-P0AFJ7-F1-model_v2_&_NOBFS_0']	499	1	1	1
AF-P0AFK0-F1-model_v2_&_NOBFS_0	ALPHAFOLD	{u'b4235': 1}	96.6978	{u'b4235': {u'A': [True, 96.69784444444444]}}	[u'AF-P0AFK0-F1-model_v2_&_NOBFS_0']	450	1	1	1
AF-P0AFK2-F1-model_v2_&_NOBFS_0	ALPHAFOLD	{u'b0751': 1}	90.7114	{u'b0751': {u'A': [True, 90.71142259414226]}}	[u'AF-P0AFK2-F1-model_v2_&_NOBFS_0']	239	1	1	1
AF-P0AFK4-F1-model_v2_&_NOBFS_0	ALPHAFOLD	{u'b1125': 1}	91.3095	{u'b1125': {u'A': [True, 91.30952727272728]}}	[u'AF-P0AFK4-F1-model_v2_&_NOBFS_0']	275	1	1	1
AF-P0AFK6-F1-model_v2_&_NOBFS_0	ALPHAFOLD	{u'b1124': 1}	86.8367	{u'b1124': {u'A': [True, 86.83666666666666]}}	[u'AF-P0AFK6-F1-model_v2_&_NOBFS_0']	264	1	1	1
AF-P0AFK9-F1-model_v2_&_NOBFS_0	ALPHAFOLD	{u'b1123': 1}	92.5969	{u'b1123': {u'A': [True, 92.59689655172413]}}	[u'AF-P0AFK9-F1-model_v2_&_NOBFS_0']	348	1	1	1
AF-P0AFL1-F1-model_v2_&_NOBFS_0	ALPHAFOLD	{u'b0857': 1}	87.8402	{u'b0857': {u'A': [True, 87.84024911032029]}}	[u'AF-P0AFL1-F1-model_v2_&_NOBFS_0']	281	1	1	1
AF-P0AFL3-F1-model_v2_&_NOBFS_0	ALPHAFOLD	{u'b3363': 1}	91.6122	{u'b3363': {u'A': [True, 91.61215789473682]}}	[u'AF-P0AFL3-F1-model_v2_&_NOBFS_0']	190	1	1	1
AF-P0AFL6-F1-model_v2_&_NOBFS_0	ALPHAFOLD	{u'b2502': 1}	92.8235	{u'b2502': {u'A': [True, 92.82348927875243]}}	[u'AF-P0AFL6-F1-model_v2_&_NOBFS_0']	513	1	1	1
AF-P0AFL9-F1-model_v2_&_NOBFS_0	ALPHAFOLD	{u'b0950': 1}	87.5731	{u'b0950': {u'A': [True, 87.57306954436451]}}	[u'AF-P0AFL9-F1-model_v2_&_NOBFS_0']	417	1	1	1
AF-P0AFM2-F1-model_v2_&_NOBFS_0	ALPHAFOLD	{u'b2679': 1}	94.7232	{u'b2679': {u'A': [True, 94.72324242424243]}}	[u'AF-P0AFM2-F1-model_v2_&_NOBFS_0']	330	1	1	1
AF-P0AFM4-F1-model_v2_&_NOBFS_0	ALPHAFOLD	{u'b0384': 1}	76.8074	{u'b0384': {u'A': [True, 76.80735849056603]}}	[u'AF-P0AFM4-F1-model_v2_&_NOBFS_0']	106	1	1	1
AF-P0AFM6-F1-model_v2_&_NOBFS_0	ALPHAFOLD	{u'b1304': 1}	85.3155	{u'b1304': {u'A': [True, 85.31554054054052]}}	[u'AF-P0AFM6-F1-model_v2_&_NOBFS_0']	222	1	1	1
AF-P0AFM9-F1-model_v2_&_NOBFS_0	ALPHAFOLD	{u'b1305': 1}	86.5509	{u'b1305': {u'A': [True, 86.55094594594595]}}	[u'AF-P0AFM9-F1-model_v2_&_NOBFS_0']	74	1	1	1
AF-P0AFN2-F1-model_v2_&_NOBFS_0	ALPHAFOLD	{u'b1306': 1}	64.1945	{u'b1306': {u'A': [True, 64.1944537815126]}}	[u'AF-P0AFN2-F1-model_v2_&_NOBFS_0']	119	1	1	1
AF-P0AFN6-F1-model_v2_&_NOBFS_0	ALPHAFOLD	{u'b0128': 1}	84.2104	{u'b0128': {u'A': [True, 84.210390625]}}	[u'AF-P0AFN6-F1-model_v2_&_NOBFS_0']	256	1	1	1
AF-P0AFP0-F1-model_v2_&_NOBFS_0	ALPHAFOLD	{u'b0157': 1}	91.4067	{u'b0157': {u'A': [True, 91.40671497584542]}}	[u'AF-P0AFP0-F1-model_v2_&_NOBFS_0']	207	1	1	1
AF-P0AFP2-F1-model_v2_&_NOBFS_0	ALPHAFOLD	{u'b0454': 1}	87.2064	{u'b0454': {u'A': [True, 87.20643410852713]}}	[u'AF-P0AFP2-F1-model_v2_&_NOBFS_0']	129	1	1	1
AF-P0AFP4-F1-model_v2_&_NOBFS_0	ALPHAFOLD	{u'b0493': 1}	92.9684	{u'b0493': {u'A': [True, 92.96836431226767]}}	[u'AF-P0AFP4-F1-model_v2_&_NOBFS_0']	269	1	1	1
AF-P0AFP6-F1-model_v2_&_NOBFS_0	ALPHAFOLD	{u'b0710': 1}	97.9087	{u'b0710': {u'A': [True, 97.90874493927126]}}	[u'AF-P0AFP6-F1-model_v2_&_NOBFS_0']	247	1	1	1
AF-P0AFP9-F1-model_v2_&_NOBFS_0	ALPHAFOLD	{u'b0792': 1}	87.0163	{u'b0792': {u'A': [True, 87.01633152173913]}}	[u'AF-P0AFP9-F1-model_v2_&_NOBFS_0']	368	1	1	1
AF-P0AFQ2-F1-model_v2_&_NOBFS_0	ALPHAFOLD	{u'b0793': 1}	87.3953	{u'b0793': {u'A': [True, 87.3953050397878]}}	[u'AF-P0AFQ2-F1-model_v2_&_NOBFS_0']	377	1	1	1
AF-P0AFQ5-F1-model_v2_&_NOBFS_0	ALPHAFOLD	{u'b1010': 1}	96.8224	{u'b1010': {u'A': [True, 96.822421875]}}	[u'AF-P0AFQ5-F1-model_v2_&_NOBFS_0']	128	1	1	1
AF-P0AFQ7-F1-model_v2_&_NOBFS_0	ALPHAFOLD	{u'b1100': 1}	97.8649	{u'b1100': {u'A': [True, 97.8648679245283]}}	[u'AF-P0AFQ7-F1-model_v2_&_NOBFS_0']	265	1	1	1
AF-P0AFR0-F1-model_v2_&_NOBFS_0	ALPHAFOLD	{u'b1234': 1}	84.3389	{u'b1234': {u'A': [True, 84.33887043189368]}}	[u'AF-P0AFR0-F1-model_v2_&_NOBFS_0']	301	1	1	1
AF-P0AFR2-F1-model_v2_&_NOBFS_0	ALPHAFOLD	{u'b1206': 1}	91.9832	{u'b1206': {u'A': [True, 91.98323792486585]}}	[u'AF-P0AFR2-F1-model_v2_&_NOBFS_0']	559	1	1	1
AF-P0AFR4-F1-model_v2_&_NOBFS_0	ALPHAFOLD	{u'b1267': 1}	95.9381	{u'b1267': {u'A': [True, 95.9381067961165]}}	[u'AF-P0AFR4-F1-model_v2_&_NOBFS_0']	206	1	1	1
AF-P0AFR7-F1-model_v2_&_NOBFS_0	ALPHAFOLD	{u'b1311': 1}	91.1065	{u'b1311': {u'A': [True, 91.10651877133104]}}	[u'AF-P0AFR7-F1-model_v2_&_NOBFS_0']	293	1	1	1
AF-P0AFR9-F1-model_v2_&_NOBFS_0	ALPHAFOLD	{u'b1443': 1}	89.5178	{u'b1443': {u'A': [True, 89.51780303030303]}}	[u'AF-P0AFR9-F1-model_v2_&_NOBFS_0']	264	1	1	1
AF-P0AFS1-F1-model_v2_&_NOBFS_0	ALPHAFOLD	{u'b1515': 1}	88.9961	{u'b1515': {u'A': [True, 88.99606060606061]}}	[u'AF-P0AFS1-F1-model_v2_&_NOBFS_0']	330	1	1	1
AF-P0AFS3-F1-model_v2_&_NOBFS_0	ALPHAFOLD	{u'b1606': 1}	96.2505	{u'b1606': {u'A': [True, 96.2505]}}	[u'AF-P0AFS3-F1-model_v2_&_NOBFS_0']	240	1	1	1
AF-P0AFS5-F1-model_v2_&_NOBFS_0	ALPHAFOLD	{u'b1601': 1}	86.3194	{u'b1601': {u'A': [True, 86.31936046511628]}}	[u'AF-P0AFS5-F1-model_v2_&_NOBFS_0']	344	1	1	1
AF-P0AFS7-F1-model_v2_&_NOBFS_0	ALPHAFOLD	{u'b1688': 1}	80.4739	{u'b1688': {u'A': [True, 80.47386486486486]}}	[u'AF-P0AFS7-F1-model_v2_&_NOBFS_0']	370	1	1	1
AF-P0AFS9-F1-model_v2_&_NOBFS_0	ALPHAFOLD	{u'b1856': 1}	84.7908	{u'b1856': {u'A': [True, 84.79077272727274]}}	[u'AF-P0AFS9-F1-model_v2_&_NOBFS_0']	440	1	1	1
AF-P0AFT2-F1-model_v2_&_NOBFS_0	ALPHAFOLD	{u'b1918': 1}	94.9541	{u'b1918': {u'A': [True, 94.95405405405407]}}	[u'AF-P0AFT2-F1-model_v2_&_NOBFS_0']	222	1	1	1
AF-P0AFT5-F1-model_v2_&_NOBFS_0	ALPHAFOLD	{u'b2125': 1}	90.8585	{u'b2125': {u'A': [True, 90.85845188284519]}}	[u'AF-P0AFT5-F1-model_v2_&_NOBFS_0']	239	1	1	1
AF-P0AFT8-F1-model_v2_&_NOBFS_0	ALPHAFOLD	{u'b4502': 1}	95.724	{u'b4502': {u'A': [True, 95.72404761904761]}}	[u'AF-P0AFT8-F1-model_v2_&_NOBFS_0']	84	1	1	1
AF-P0AFU0-F1-model_v2_&_NOBFS_0	ALPHAFOLD	{u'b2178': 1}	83.2094	{u'b2178': {u'A': [True, 83.20939560439561]}}	[u'AF-P0AFU0-F1-model_v2_&_NOBFS_0']	364	1	1	1
AF-P0AFU2-F1-model_v2_&_NOBFS_0	ALPHAFOLD	{u'b2292': 1}	82.3765	{u'b2292': {u'A': [True, 82.37649180327868]}}	[u'AF-P0AFU2-F1-model_v2_&_NOBFS_0']	610	1	1	1
AF-P0AFU4-F1-model_v2_&_NOBFS_0	ALPHAFOLD	{u'b2554': 1}	86.7501	{u'b2554': {u'A': [True, 86.75013513513512]}}	[u'AF-P0AFU4-F1-model_v2_&_NOBFS_0']	444	1	1	1
AF-P0AFU6-F1-model_v2_&_NOBFS_0	ALPHAFOLD	{u'b3890': 1}	78.3699	{u'b3890': {u'A': [True, 78.3698611111111]}}	[u'AF-P0AFU6-F1-model_v2_&_NOBFS_0']	72	1	1	1
AF-P0AFU8-F1-model_v2_&_NOBFS_0	ALPHAFOLD	{u'b1662': 1}	95.0276	{u'b1662': {u'A': [True, 95.02755868544601]}}	[u'AF-P0AFU8-F1-model_v2_&_NOBFS_0']	213	1	1	1
AF-P0AFV0-F1-model_v2_&_NOBFS_0	ALPHAFOLD	{u'b3597': 1}	90.7281	{u'b3597': {u'A': [True, 90.72812169312171]}}	[u'AF-P0AFV0-F1-model_v2_&_NOBFS_0']	378	1	1	1
AF-P0AFV2-F1-model_v2_&_NOBFS_0	ALPHAFOLD	{u'b3508': 1}	90.4347	{u'b3508': {u'A': [True, 90.4346976744186]}}	[u'AF-P0AFV2-F1-model_v2_&_NOBFS_0']	215	1	1	1
AF-P0AFV4-F1-model_v2_&_NOBFS_0	ALPHAFOLD	{u'b2175': 1}	85.2265	{u'b2175': {u'A': [True, 85.22648936170212]}}	[u'AF-P0AFV4-F1-model_v2_&_NOBFS_0']	188	1	1	1
AF-P0AFV8-F1-model_v2_&_NOBFS_0	ALPHAFOLD	{u'b1307': 1}	70.0393	{u'b1307': {u'A': [True, 70.03931506849315]}}	[u'AF-P0AFV8-F1-model_v2_&_NOBFS_0']	73	1	1	1
AF-P0AFW0-F1-model_v2_&_NOBFS_0	ALPHAFOLD	{u'b3842': 1}	78.3348	{u'b3842': {u'A': [True, 78.33475308641975]}}	[u'AF-P0AFW0-F1-model_v2_&_NOBFS_0']	162	1	1	1
AF-P0AFW2-F1-model_v2_&_NOBFS_0	ALPHAFOLD	{u'b0953': 1}	87.1845	{u'b0953': {u'A': [True, 87.18454545454544]}}	[u'AF-P0AFW2-F1-model_v2_&_NOBFS_0']	55	1	1	1
AF-P0AFW4-F1-model_v2_&_NOBFS_0	ALPHAFOLD	{u'b0610': 1}	94.767	{u'b0610': {u'A': [True, 94.76698529411766]}}	[u'AF-P0AFW4-F1-model_v2_&_NOBFS_0']	136	1	1	1
AF-P0AFW8-F1-model_v2_&_NOBFS_0	ALPHAFOLD	{u'b0189': 1}	66.5875	{u'b0189': {u'A': [True, 66.5875]}}	[u'AF-P0AFW8-F1-model_v2_&_NOBFS_0']	84	1	1	1
AF-P0AFX0-F1-model_v2_&_NOBFS_0	ALPHAFOLD	{u'b3203': 1}	94.7469	{u'b3203': {u'A': [True, 94.74694736842105]}}	[u'AF-P0AFX0-F1-model_v2_&_NOBFS_0']	95	1	1	1
AF-P0AFX4-F1-model_v2_&_NOBFS_0	ALPHAFOLD	{u'b3995': 1}	91.3677	{u'b3995': {u'A': [True, 91.36772151898734]}}	[u'AF-P0AFX4-F1-model_v2_&_NOBFS_0']	158	1	1	1
AF-P0AFX7-F1-model_v2_&_NOBFS_0	ALPHAFOLD	{u'b2572': 1}	71.0319	{u'b2572': {u'A': [True, 71.03189814814814]}}	[u'AF-P0AFX7-F1-model_v2_&_NOBFS_0']	216	1	1	1
AF-P0AFX9-F1-model_v2_&_NOBFS_0	ALPHAFOLD	{u'b2571': 1}	91.3314	{u'b2571': {u'A': [True, 91.3314465408805]}}	[u'AF-P0AFX9-F1-model_v2_&_NOBFS_0']	318	1	1	1
AF-P0AFY2-F1-model_v2_&_NOBFS_0	ALPHAFOLD	{u'b2144': 1}	89.3592	{u'b2144': {u'A': [True, 89.35916317991632]}}	[u'AF-P0AFY2-F1-model_v2_&_NOBFS_0']	239	1	1	1
AF-P0AFY6-F1-model_v2_&_NOBFS_0	ALPHAFOLD	{u'b0377': 1}	89.9362	{u'b0377': {u'A': [True, 89.93620689655172]}}	[u'AF-P0AFY6-F1-model_v2_&_NOBFS_0']	406	1	1	1
AF-P0AFY8-F1-model_v2_&_NOBFS_0	ALPHAFOLD	{u'b0687': 1}	88.4613	{u'b0687': {u'A': [True, 88.46132596685082]}}	[u'AF-P0AFY8-F1-model_v2_&_NOBFS_0']	181	1	1	1
AF-P0AFZ1-F1-model_v2_&_NOBFS_0	ALPHAFOLD	{u'b2522': 1}	82.5507	{u'b2522': {u'A': [True, 82.55065891472869]}}	[u'AF-P0AFZ1-F1-model_v2_&_NOBFS_0']	258	1	1	1
AF-P0AFZ3-F1-model_v2_&_NOBFS_0	ALPHAFOLD	{u'b3228': 1}	82.6343	{u'b3228': {u'A': [True, 82.63430303030303]}}	[u'AF-P0AFZ3-F1-model_v2_&_NOBFS_0']	165	1	1	1
AF-P0AFZ5-F1-model_v2_&_NOBFS_0	ALPHAFOLD	{u'b0958': 1}	79.1518	{u'b0958': {u'A': [True, 79.15183431952663]}}	[u'AF-P0AFZ5-F1-model_v2_&_NOBFS_0']	169	1	1	1
AF-P0AFZ7-F1-model_v2_&_NOBFS_0	ALPHAFOLD	{u'b3849': 1}	89.9268	{u'b3849': {u'A': [True, 89.9267701863354]}}	[u'AF-P0AFZ7-F1-model_v2_&_NOBFS_0']	483	1	1	1
AF-P0AG00-F1-model_v2_&_NOBFS_0	ALPHAFOLD	{u'b3785': 1}	90.5932	{u'b3785': {u'A': [True, 90.59318965517241]}}	[u'AF-P0AG00-F1-model_v2_&_NOBFS_0']	348	1	1	1
AF-P0AG03-F1-model_v2_&_NOBFS_0	ALPHAFOLD	{u'b2311': 1}	97.9158	{u'b2311': {u'A': [True, 97.9157671957672]}}	[u'AF-P0AG03-F1-model_v2_&_NOBFS_0']	189	1	1	1
AF-P0AG07-F1-model_v2_&_NOBFS_0	ALPHAFOLD	{u'b3386': 1}	97.4984	{u'b3386': {u'A': [True, 97.49835555555555]}}	[u'AF-P0AG07-F1-model_v2_&_NOBFS_0']	225	1	1	1
AF-P0AG11-F1-model_v2_&_NOBFS_0	ALPHAFOLD	{u'b1183': 1}	90.9677	{u'b1183': {u'A': [True, 90.96769784172663]}}	[u'AF-P0AG11-F1-model_v2_&_NOBFS_0']	139	1	1	1
AF-P0AG14-F1-model_v2_&_NOBFS_0	ALPHAFOLD	{u'b1272': 1}	89.5512	{u'b1272': {u'A': [True, 89.55120343839542]}}	[u'AF-P0AG14-F1-model_v2_&_NOBFS_0']	349	1	1	1
AF-P0AG16-F1-model_v2_&_NOBFS_0	ALPHAFOLD	{u'b2312': 1}	91.2555	{u'b2312': {u'A': [True, 91.25546534653466]}}	[u'AF-P0AG16-F1-model_v2_&_NOBFS_0']	505	1	1	1
AF-P0AG18-F1-model_v2_&_NOBFS_0	ALPHAFOLD	{u'b0523': 1}	95.801	{u'b0523': {u'A': [True, 95.80100591715977]}}	[u'AF-P0AG18-F1-model_v2_&_NOBFS_0']	169	1	1	1
AF-P0AG20-F1-model_v2_&_NOBFS_0	ALPHAFOLD	{u'b2784': 1}	79.9444	{u'b2784': {u'A': [True, 79.94444892473118]}}	[u'AF-P0AG20-F1-model_v2_&_NOBFS_0']	744	1	1	1
AF-P0AG24-F1-model_v2_&_NOBFS_0	ALPHAFOLD	{u'b3650': 1}	83.242	{u'b3650': {u'A': [True, 83.2420227920228]}}	[u'AF-P0AG24-F1-model_v2_&_NOBFS_0']	702	1	1	1
AF-P0AG27-F1-model_v2_&_NOBFS_0	ALPHAFOLD	{u'b3611': 1}	92.2536	{u'b3611': {u'A': [True, 92.25356643356642]}}	[u'AF-P0AG27-F1-model_v2_&_NOBFS_0']	143	1	1	1
AF-P0AG30-F1-model_v2_&_NOBFS_0	ALPHAFOLD	{u'b3783': 1}	93.5018	{u'b3783': {u'A': [True, 93.5018138424821]}}	[u'AF-P0AG30-F1-model_v2_&_NOBFS_0']	419	1	1	1
AF-P0AG34-F1-model_v2_&_NOBFS_0	ALPHAFOLD	{u'b3824': 1}	85.7989	{u'b3824': {u'A': [True, 85.79893203883496]}}	[u'AF-P0AG34-F1-model_v2_&_NOBFS_0']	206	1	1	1
AF-P0AG38-F1-model_v2_&_NOBFS_0	ALPHAFOLD	{u'b3823': 1}	82.3924	{u'b3823': {u'A': [True, 82.39242718446602]}}	[u'AF-P0AG38-F1-model_v2_&_NOBFS_0']	206	1	1	1
AF-P0AG40-F1-model_v2_&_NOBFS_0	ALPHAFOLD	{u'b0025': 1}	93.2122	{u'b0025': {u'A': [True, 93.21220447284344]}}	[u'AF-P0AG40-F1-model_v2_&_NOBFS_0']	313	1	1	1
AF-P0AG44-F1-model_v2_&_NOBFS_0	ALPHAFOLD	{u'b3294': 1}	91.4961	{u'b3294': {u'A': [True, 91.49614173228343]}}	[u'AF-P0AG44-F1-model_v2_&_NOBFS_0']	127	1	1	1
AF-P0AG48-F1-model_v2_&_NOBFS_0	ALPHAFOLD	{u'b3186': 1}	95.1347	{u'b3186': {u'A': [True, 95.13466019417477]}}	[u'AF-P0AG48-F1-model_v2_&_NOBFS_0']	103	1	1	1
AF-P0AG51-F1-model_v2_&_NOBFS_0	ALPHAFOLD	{u'b3302': 1}	95.2592	{u'b3302': {u'A': [True, 95.2591525423729]}}	[u'AF-P0AG51-F1-model_v2_&_NOBFS_0']	59	1	1	1
AF-P0AG55-F1-model_v2_&_NOBFS_0	ALPHAFOLD	{u'b3305': 1}	93.5473	{u'b3305': {u'A': [True, 93.54734463276834]}}	[u'AF-P0AG55-F1-model_v2_&_NOBFS_0']	177	1	1	1
AF-P0AG59-F1-model_v2_&_NOBFS_0	ALPHAFOLD	{u'b3307': 1}	94.4023	{u'b3307': {u'A': [True, 94.40227722772278]}}	[u'AF-P0AG59-F1-model_v2_&_NOBFS_0']	101	1	1	1
AF-P0AG63-F1-model_v2_&_NOBFS_0	ALPHAFOLD	{u'b3311': 1}	93.1538	{u'b3311': {u'A': [True, 93.15380952380953]}}	[u'AF-P0AG63-F1-model_v2_&_NOBFS_0']	84	1	1	1
AF-P0AG67-F1-model_v2_&_NOBFS_0	ALPHAFOLD	{u'b0911': 1}	70.1692	{u'b0911': {u'A': [True, 70.16917414721723]}}	[u'AF-P0AG67-F1-model_v2_&_NOBFS_0']	557	1	1	1
AF-P0AG71-F1-model_v2_&_NOBFS_0	ALPHAFOLD	{u'b3832': 1}	80.4132	{u'b3832': {u'A': [True, 80.41322105263157]}}	[u'AF-P0AG71-F1-model_v2_&_NOBFS_0']	475	1	1	1
AF-P0AG74-F1-model_v2_&_NOBFS_0	ALPHAFOLD	{u'b0550': 1}	96.4065	{u'b0550': {u'A': [True, 96.40650000000001]}}	[u'AF-P0AG74-F1-model_v2_&_NOBFS_0']	120	1	1	1
AF-P0AG76-F1-model_v2_&_NOBFS_0	ALPHAFOLD	{u'b0398': 1}	92.9173	{u'b0398': {u'A': [True, 92.91735]}}	[u'AF-P0AG76-F1-model_v2_&_NOBFS_0']	400	1	1	1
AF-P0AG78-F1-model_v2_&_NOBFS_0	ALPHAFOLD	{u'b3917': 1}	95.1249	{u'b3917': {u'A': [True, 95.12492401215805]}}	[u'AF-P0AG78-F1-model_v2_&_NOBFS_0']	329	1	1	1
AF-P0AG80-F1-model_v2_&_NOBFS_0	ALPHAFOLD	{u'b3453': 1}	94.7302	{u'b3453': {u'A': [True, 94.73018264840182]}}	[u'AF-P0AG80-F1-model_v2_&_NOBFS_0']	438	1	1	1
AF-P0AG82-F1-model_v2_&_NOBFS_0	ALPHAFOLD	{u'b3728': 1}	94.8756	{u'b3728': {u'A': [True, 94.87563583815029]}}	[u'AF-P0AG82-F1-model_v2_&_NOBFS_0']	346	1	1	1
AF-P0AG84-F1-model_v2_&_NOBFS_0	ALPHAFOLD	{u'b3003': 1}	98.2934	{u'b3003': {u'A': [True, 98.29340136054421]}}	[u'AF-P0AG84-F1-model_v2_&_NOBFS_0']	294	1	1	1
AF-P0AG86-F1-model_v2_&_NOBFS_0	ALPHAFOLD	{u'b3609': 1}	89.4561	{u'b3609': {u'A': [True, 89.45612903225808]}}	[u'AF-P0AG86-F1-model_v2_&_NOBFS_0']	155	1	1	1
AF-P0AG90-F1-model_v2_&_NOBFS_0	ALPHAFOLD	{u'b0408': 1}	85.8357	{u'b0408': {u'A': [True, 85.83567479674797]}}	[u'AF-P0AG90-F1-model_v2_&_NOBFS_0']	615	1	1	1
AF-P0AG93-F1-model_v2_&_NOBFS_0	ALPHAFOLD	{u'b0409': 1}	82.8053	{u'b0409': {u'A': [True, 82.80532507739939]}}	[u'AF-P0AG93-F1-model_v2_&_NOBFS_0']	323	1	1	1
AF-P0AG96-F1-model_v2_&_NOBFS_0	ALPHAFOLD	{u'b3981': 1}	79.1261	{u'b3981': {u'A': [True, 79.126062992126]}}	[u'AF-P0AG96-F1-model_v2_&_NOBFS_0']	127	1	1	1
AF-P0AG99-F1-model_v2_&_NOBFS_0	ALPHAFOLD	{u'b3175': 1}	65.8915	{u'b3175': {u'A': [True, 65.89154545454547]}}	[u'AF-P0AG99-F1-model_v2_&_NOBFS_0']	110	1	1	1
AF-P0AGA2-F1-model_v2_&_NOBFS_0	ALPHAFOLD	{u'b3300': 1}	76.7026	{u'b3300': {u'A': [True, 76.70264108352146]}}	[u'AF-P0AGA2-F1-model_v2_&_NOBFS_0']	443	1	1	1
AF-P0AGA6-F1-model_v2_&_NOBFS_0	ALPHAFOLD	{u'b3669': 1}	92.4786	{u'b3669': {u'A': [True, 92.47862244897959]}}	[u'AF-P0AGA6-F1-model_v2_&_NOBFS_0']	196	1	1	1
AF-P0AGB0-F1-model_v2_&_NOBFS_0	ALPHAFOLD	{u'b4388': 1}	94.2398	{u'b4388': {u'A': [True, 94.23981366459628]}}	[u'AF-P0AGB0-F1-model_v2_&_NOBFS_0']	322	1	1	1
AF-P0AGB3-F1-model_v2_&_NOBFS_0	ALPHAFOLD	{u'b3461': 1}	87.7393	{u'b3461': {u'A': [True, 87.73926056338027]}}	[u'AF-P0AGB3-F1-model_v2_&_NOBFS_0']	284	1	1	1
AF-P0AGB6-F1-model_v2_&_NOBFS_0	ALPHAFOLD	{u'b2573': 1}	82.3442	{u'b2573': {u'A': [True, 82.3441884816754]}}	[u'AF-P0AGB6-F1-model_v2_&_NOBFS_0']	191	1	1	1
AF-P0AGC0-F1-model_v2_&_NOBFS_0	ALPHAFOLD	{u'b3666': 1}	89.1851	{u'b3666': {u'A': [True, 89.18507559395249]}}	[u'AF-P0AGC0-F1-model_v2_&_NOBFS_0']	463	1	1	1
AF-P0AGC3-F1-model_v2_&_NOBFS_0	ALPHAFOLD	{u'b4392': 1}	94.1531	{u'b4392': {u'A': [True, 94.15305426356589]}}	[u'AF-P0AGC3-F1-model_v2_&_NOBFS_0']	645	1	1	1
AF-P0AGC5-F1-model_v2_&_NOBFS_0	ALPHAFOLD	{u'b2558': 1}	88.6053	{u'b2558': {u'A': [True, 88.60532818532818]}}	[u'AF-P0AGC5-F1-model_v2_&_NOBFS_0']	518	1	1	1
AF-P0AGC7-F1-model_v2_&_NOBFS_0	ALPHAFOLD	{u'b4387': 1}	72.8552	{u'b4387': {u'A': [True, 72.85518691588786]}}	[u'AF-P0AGC7-F1-model_v2_&_NOBFS_0']	214	1	1	1
AF-P0AGD1-F1-model_v2_&_NOBFS_0	ALPHAFOLD	{u'b1646': 1}	94.7224	{u'b1646': {u'A': [True, 94.72236994219654]}}	[u'AF-P0AGD1-F1-model_v2_&_NOBFS_0']	173	1	1	1
AF-P0AGD3-F1-model_v2_&_NOBFS_0	ALPHAFOLD	{u'b1656': 1}	98.2685	{u'b1656': {u'A': [True, 98.26849740932643]}}	[u'AF-P0AGD3-F1-model_v2_&_NOBFS_0']	193	1	1	1
AF-P0AGD7-F1-model_v2_&_NOBFS_0	ALPHAFOLD	{u'b2610': 1}	82.6925	{u'b2610': {u'A': [True, 82.69247240618101]}}	[u'AF-P0AGD7-F1-model_v2_&_NOBFS_0']	453	1	1	1
AF-P0AGE0-F1-model_v2_&_NOBFS_0	ALPHAFOLD	{u'b4059': 1}	81.0671	{u'b4059': {u'A': [True, 81.0670786516854]}}	[u'AF-P0AGE0-F1-model_v2_&_NOBFS_0']	178	1	1	1
AF-P0AGE4-F1-model_v2_&_NOBFS_0	ALPHAFOLD	{u'b3089': 1}	87.7043	{u'b3089': {u'A': [True, 87.70429951690822]}}	[u'AF-P0AGE4-F1-model_v2_&_NOBFS_0']	414	1	1	1
AF-P0AGE6-F1-model_v2_&_NOBFS_0	ALPHAFOLD	{u'b3713': 1}	97.6593	{u'b3713': {u'A': [True, 97.65925531914895]}}	[u'AF-P0AGE6-F1-model_v2_&_NOBFS_0']	188	1	1	1
AF-P0AGE9-F1-model_v2_&_NOBFS_0	ALPHAFOLD	{u'b0729': 1}	97.5549	{u'b0729': {u'A': [True, 97.55487889273357]}}	[u'AF-P0AGE9-F1-model_v2_&_NOBFS_0']	289	1	1	1
AF-P0AGF2-F1-model_v2_&_NOBFS_0	ALPHAFOLD	{u'b2811': 1}	90.6595	{u'b2811': {u'A': [True, 90.65945578231293]}}	[u'AF-P0AGF2-F1-model_v2_&_NOBFS_0']	147	1	1	1
AF-P0AGF4-F1-model_v2_&_NOBFS_0	ALPHAFOLD	{u'b4031': 1}	90.2781	{u'b4031': {u'A': [True, 90.27810590631366]}}	[u'AF-P0AGF4-F1-model_v2_&_NOBFS_0']	491	1	1	1
AF-P0AGF6-F1-model_v2_&_NOBFS_0	ALPHAFOLD	{u'b3117': 1}	96.2026	{u'b3117': {u'A': [True, 96.20255319148936]}}	[u'AF-P0AGF6-F1-model_v2_&_NOBFS_0']	329	1	1	1
AF-P0AGG0-F1-model_v2_&_NOBFS_0	ALPHAFOLD	{u'b0417': 1}	94.607	{u'b0417': {u'A': [True, 94.60695384615384]}}	[u'AF-P0AGG0-F1-model_v2_&_NOBFS_0']	325	1	1	1
AF-P0AGG2-F1-model_v2_&_NOBFS_0	ALPHAFOLD	{u'b0452': 1}	95.0239	{u'b0452': {u'A': [True, 95.02388111888112]}}	[u'AF-P0AGG2-F1-model_v2_&_NOBFS_0']	286	1	1	1
AF-P0AGG4-F1-model_v2_&_NOBFS_0	ALPHAFOLD	{u'b2582': 1}	95.4819	{u'b2582': {u'A': [True, 95.48194244604318]}}	[u'AF-P0AGG4-F1-model_v2_&_NOBFS_0']	139	1	1	1
AF-P0AGG8-F1-model_v2_&_NOBFS_0	ALPHAFOLD	{u'b3244': 1}	98.0389	{u'b3244': {u'A': [True, 98.03889812889814]}}	[u'AF-P0AGG8-F1-model_v2_&_NOBFS_0']	481	1	1	1
AF-P0AGH1-F1-model_v2_&_NOBFS_0	ALPHAFOLD	{u'b3485': 1}	89.7855	{u'b3485': {u'A': [True, 89.78550802139037]}}	[u'AF-P0AGH1-F1-model_v2_&_NOBFS_0']	374	1	1	1
AF-P0AGH3-F1-model_v2_&_NOBFS_0	ALPHAFOLD	{u'b1293': 1}	90.8412	{u'b1293': {u'A': [True, 90.84115264797508]}}	[u'AF-P0AGH3-F1-model_v2_&_NOBFS_0']	321	1	1	1
AF-P0AGH5-F1-model_v2_&_NOBFS_0	ALPHAFOLD	{u'b1292': 1}	91.6432	{u'b1292': {u'A': [True, 91.64324324324325]}}	[u'AF-P0AGH5-F1-model_v2_&_NOBFS_0']	296	1	1	1
AF-P0AGH8-F1-model_v2_&_NOBFS_0	ALPHAFOLD	{u'b3727': 1}	90.5231	{u'b3727': {u'A': [True, 90.52313479623825]}}	[u'AF-P0AGH8-F1-model_v2_&_NOBFS_0']	319	1	1	1
AF-P0AGI1-F1-model_v2_&_NOBFS_0	ALPHAFOLD	{u'b3750': 1}	89.9019	{u'b3750': {u'A': [True, 89.90186915887851]}}	[u'AF-P0AGI1-F1-model_v2_&_NOBFS_0']	321	1	1	1
AF-P0AGI4-F1-model_v2_&_NOBFS_0	ALPHAFOLD	{u'b3568': 1}	88.275	{u'b3568': {u'A': [True, 88.27498727735369]}}	[u'AF-P0AGI4-F1-model_v2_&_NOBFS_0']	393	1	1	1
AF-P0AGI8-F1-model_v2_&_NOBFS_0	ALPHAFOLD	{u'b3290': 1}	91.841	{u'b3290': {u'A': [True, 91.84104803493449]}}	[u'AF-P0AGI8-F1-model_v2_&_NOBFS_0']	458	1	1	1
AF-P0AGJ2-F1-model_v2_&_NOBFS_0	ALPHAFOLD	{u'b3651': 1}	93.4565	{u'b3651': {u'A': [True, 93.45650655021835]}}	[u'AF-P0AGJ2-F1-model_v2_&_NOBFS_0']	229	1	1	1
AF-P0AGJ5-F1-model_v2_&_NOBFS_0	ALPHAFOLD	{u'b2581': 1}	79.9981	{u'b2581': {u'A': [True, 79.99805797101449]}}	[u'AF-P0AGJ5-F1-model_v2_&_NOBFS_0']	345	1	1	1
AF-P0AGJ7-F1-model_v2_&_NOBFS_0	ALPHAFOLD	{u'b3606': 1}	94.3163	{u'b3606': {u'A': [True, 94.31630573248408]}}	[u'AF-P0AGJ7-F1-model_v2_&_NOBFS_0']	157	1	1	1
AF-P0AGJ9-F1-model_v2_&_NOBFS_0	ALPHAFOLD	{u'b1637': 1}	93.988	{u'b1637': {u'A': [True, 93.98799528301888]}}	[u'AF-P0AGJ9-F1-model_v2_&_NOBFS_0']	424	1	1	1
AF-P0AGK1-F1-model_v2_&_NOBFS_0	ALPHAFOLD	{u'b4040': 1}	93.4156	{u'b4040': {u'A': [True, 93.41562068965519]}}	[u'AF-P0AGK1-F1-model_v2_&_NOBFS_0']	290	1	1	1
AF-P0AGK4-F1-model_v2_&_NOBFS_0	ALPHAFOLD	{u'b3180': 1}	95.6935	{u'b3180': {u'A': [True, 95.69350515463918]}}	[u'AF-P0AGK4-F1-model_v2_&_NOBFS_0']	97	1	1	1
AF-P0AGK8-F1-model_v2_&_NOBFS_0	ALPHAFOLD	{u'b2531': 1}	89.3094	{u'b2531': {u'A': [True, 89.30944444444445]}}	[u'AF-P0AGK8-F1-model_v2_&_NOBFS_0']	162	1	1	1
AF-P0AGL2-F1-model_v2_&_NOBFS_0	ALPHAFOLD	{u'b3113': 1}	97.5868	{u'b3113': {u'A': [True, 97.58682170542636]}}	[u'AF-P0AGL2-F1-model_v2_&_NOBFS_0']	129	1	1	1
AF-P0AGL5-F1-model_v2_&_NOBFS_0	ALPHAFOLD	{u'b2619': 1}	92.7646	{u'b2619': {u'A': [True, 92.76455696202532]}}	[u'AF-P0AGL5-F1-model_v2_&_NOBFS_0']	158	1	1	1
AF-P0AGL7-F1-model_v2_&_NOBFS_0	ALPHAFOLD	{u'b2946': 1}	93.9698	{u'b2946': {u'A': [True, 93.96979423868312]}}	[u'AF-P0AGL7-F1-model_v2_&_NOBFS_0']	243	1	1	1
AF-P0AGM0-F1-model_v2_&_NOBFS_0	ALPHAFOLD	{u'b3474': 1}	83.7134	{u'b3474': {u'A': [True, 83.71335243553008]}}	[u'AF-P0AGM0-F1-model_v2_&_NOBFS_0']	349	1	1	1
AF-P0AGM2-F1-model_v2_&_NOBFS_0	ALPHAFOLD	{u'b3646': 1}	92.6257	{u'b3646': {u'A': [True, 92.62565853658536]}}	[u'AF-P0AGM2-F1-model_v2_&_NOBFS_0']	205	1	1	1
AF-P0AGM5-F1-model_v2_&_NOBFS_0	ALPHAFOLD	{u'b1214': 1}	93.538	{u'b1214': {u'A': [True, 93.53795539033457]}}	[u'AF-P0AGM5-F1-model_v2_&_NOBFS_0']	269	1	1	1
AF-P0AGM7-F1-model_v2_&_NOBFS_0	ALPHAFOLD	{u'b2497': 1}	90.5715	{u'b2497': {u'A': [True, 90.57153846153847]}}	[u'AF-P0AGM7-F1-model_v2_&_NOBFS_0']	429	1	1	1
AF-P0AGM9-F1-model_v2_&_NOBFS_0	ALPHAFOLD	{u'b3654': 1}	88.5195	{u'b3654': {u'A': [True, 88.51952483801294]}}	[u'AF-P0AGM9-F1-model_v2_&_NOBFS_0']	463	1	1	1
AF-P0C018-F1-model_v2_&_NOBFS_0	ALPHAFOLD	{u'b3304': 1}	94.2417	{u'b3304': {u'A': [True, 94.24170940170941]}}	[u'AF-P0C018-F1-model_v2_&_NOBFS_0']	117	1	1	1
AF-P0C037-F1-model_v2_&_NOBFS_0	ALPHAFOLD	{u'b0391': 1}	97.5453	{u'b0391': {u'A': [True, 97.54531914893619]}}	[u'AF-P0C037-F1-model_v2_&_NOBFS_0']	94	1	1	1
AF-P0C054-F1-model_v2_&_NOBFS_0	ALPHAFOLD	{u'b3687': 1}	79.7751	{u'b3687': {u'A': [True, 79.7751094890511]}}	[u'AF-P0C054-F1-model_v2_&_NOBFS_0']	137	1	1	1
AF-P0C058-F1-model_v2_&_NOBFS_0	ALPHAFOLD	{u'b3686': 1}	82.7512	{u'b3686': {u'A': [True, 82.75119718309858]}}	[u'AF-P0C058-F1-model_v2_&_NOBFS_0']	142	1	1	1
AF-P0C066-F1-model_v2_&_NOBFS_0	ALPHAFOLD	{u'b2963': 1}	90.9211	{u'b2963': {u'A': [True, 90.92108635097493]}}	[u'AF-P0C066-F1-model_v2_&_NOBFS_0']	359	1	1	1
AF-P0C077-F1-model_v2_&_NOBFS_0	ALPHAFOLD	{u'b1563': 1}	93.5845	{u'b1563': {u'A': [True, 93.58452631578946]}}	[u'AF-P0C077-F1-model_v2_&_NOBFS_0']	95	1	1	1
AF-P0C079-F1-model_v2_&_NOBFS_0	ALPHAFOLD	{u'b1564': 1}	88.1213	{u'b1564': {u'A': [True, 88.12126582278479]}}	[u'AF-P0C079-F1-model_v2_&_NOBFS_0']	79	1	1	1
AF-P0C093-F1-model_v2_&_NOBFS_0	ALPHAFOLD	{u'b3641': 1}	95.2199	{u'b3641': {u'A': [True, 95.21994949494949]}}	[u'AF-P0C093-F1-model_v2_&_NOBFS_0']	198	1	1	1
AF-P0C0K3-F1-model_v2_&_NOBFS_0	ALPHAFOLD	{u'b3859': 1}	94.3748	{u'b3859': {u'A': [True, 94.37478658536585]}}	[u'AF-P0C0K3-F1-model_v2_&_NOBFS_0']	328	1	1	1
AF-P0C0L2-F1-model_v2_&_NOBFS_0	ALPHAFOLD	{u'b1482': 1}	97.4213	{u'b1482': {u'A': [True, 97.42132867132865]}}	[u'AF-P0C0L2-F1-model_v2_&_NOBFS_0']	143	1	1	1
AF-P0C0L7-F1-model_v2_&_NOBFS_0	ALPHAFOLD	{u'b4111': 1}	82.7725	{u'b4111': {u'A': [True, 82.77246000000001]}}	[u'AF-P0C0L7-F1-model_v2_&_NOBFS_0']	500	1	1	1
AF-P0C0L9-F1-model_v2_&_NOBFS_0	ALPHAFOLD	{u'b2524': 1}	92.6105	{u'b2524': {u'A': [True, 92.61045454545456]}}	[u'AF-P0C0L9-F1-model_v2_&_NOBFS_0']	66	1	1	1
AF-P0C0R7-F1-model_v2_&_NOBFS_0	ALPHAFOLD	{u'b3179': 1}	94.1096	{u'b3179': {u'A': [True, 94.10961722488038]}}	[u'AF-P0C0R7-F1-model_v2_&_NOBFS_0']	209	1	1	1
AF-P0C0S1-F1-model_v2_&_NOBFS_0	ALPHAFOLD	{u'b2924': 1}	92.4233	{u'b2924': {u'A': [True, 92.42332167832167]}}	[u'AF-P0C0S1-F1-model_v2_&_NOBFS_0']	286	1	1	1
AF-P0C0T5-F1-model_v2_&_NOBFS_0	ALPHAFOLD	{u'b2328': 1}	92.7288	{u'b2328': {u'A': [True, 92.72883211678831]}}	[u'AF-P0C0T5-F1-model_v2_&_NOBFS_0']	274	1	1	1
AF-P0C0U4-F1-model_v2_&_NOBFS_0	ALPHAFOLD	{u'b0852': 1}	91.0439	{u'b0852': {u'A': [True, 91.04386666666666]}}	[u'AF-P0C0U4-F1-model_v2_&_NOBFS_0']	300	1	1	1
AF-P0C0V0-F1-model_v2_&_NOBFS_0	ALPHAFOLD	{u'b0161': 1}	85.3613	{u'b0161': {u'A': [True, 85.36128691983123]}}	[u'AF-P0C0V0-F1-model_v2_&_NOBFS_0']	474	1	1	1
AF-P0C7L2-F1-model_v2_&_NOBFS_0	ALPHAFOLD	{u'b1397': 1}	98.0998	{u'b1397': {u'A': [True, 98.09977556109725]}}	[u'AF-P0C7L2-F1-model_v2_&_NOBFS_0']	401	1	1	1
AF-P0C8J6-F1-model_v2_&_NOBFS_0	ALPHAFOLD	{u'b2096': 1}	95.5861	{u'b2096': {u'A': [True, 95.58609154929577]}}	[u'AF-P0C8J6-F1-model_v2_&_NOBFS_0']	284	1	1	1
AF-P0C8J8-F1-model_v2_&_NOBFS_0	ALPHAFOLD	{u'b2095': 1}	96.1845	{u'b2095': {u'A': [True, 96.1844761904762]}}	[u'AF-P0C8J8-F1-model_v2_&_NOBFS_0']	420	1	1	1
AF-P0C8K0-F1-model_v2_&_NOBFS_0	ALPHAFOLD	{u'b3132': 1}	95.0085	{u'b3132': {u'A': [True, 95.00849765258216]}}	[u'AF-P0C8K0-F1-model_v2_&_NOBFS_0']	426	1	1	1
AF-P0C960-F1-model_v2_&_NOBFS_0	ALPHAFOLD	{u'b1193': 1}	93.4722	{u'b1193': {u'A': [True, 93.47216748768473]}}	[u'AF-P0C960-F1-model_v2_&_NOBFS_0']	203	1	1	1
AF-P0CB39-F1-model_v2_&_NOBFS_0	ALPHAFOLD	{u'b3955': 1}	91.5059	{u'b3955': {u'A': [True, 91.50589254766031]}}	[u'AF-P0CB39-F1-model_v2_&_NOBFS_0']	577	1	1	1
AF-P0CB62-F1-model_v2_&_NOBFS_0	ALPHAFOLD	{u'b4522': 1}	78.8465	{u'b4522': {u'A': [True, 78.84652173913045]}}	[u'AF-P0CB62-F1-model_v2_&_NOBFS_0']	46	1	1	1
AF-P0CD93-F1-model_v2_&_NOBFS_0	ALPHAFOLD	{u'b4673': 1}	79.4919	{u'b4673': {u'A': [True, 79.49190476190476]}}	[u'AF-P0CD93-F1-model_v2_&_NOBFS_0']	21	1	1	1
AF-P0CE44-F1-model_v2_&_NOBFS_0	ALPHAFOLD	{u'b1616': 1}	86.8013	{u'b1616': {u'A': [True, 86.80126914660833]}}	[u'AF-P0CE44-F1-model_v2_&_NOBFS_0']	457	1	1	1
AF-P0CE47-F1-model_v2_&_NOBFS_0	ALPHAFOLD	{u'b3339': 1}	91.5124	{u'b3339': {u'A': [True, 91.5124111675127]}}	[u'AF-P0CE47-F1-model_v2_&_NOBFS_0']	394	1	1	1
AF-P0CE48-F1-model_v2_&_NOBFS_0	ALPHAFOLD	{u'b3980': 1}	91.5209	{u'b3980': {u'A': [True, 91.52093908629442]}}	[u'AF-P0CE48-F1-model_v2_&_NOBFS_0']	394	1	1	1
AF-P0CE49-F1-model_v2_&_NOBFS_0	ALPHAFOLD	{u'b0259': 1}	92.6021	{u'b0259': {u'A': [True, 92.60205521472392]}}	[u'AF-P0CE49-F1-model_v2_&_NOBFS_0']	326	1	1	1
AF-P0CE50-F1-model_v2_&_NOBFS_0	ALPHAFOLD	{u'b0552': 1}	92.4633	{u'b0552': {u'A': [True, 92.46331288343559]}}	[u'AF-P0CE50-F1-model_v2_&_NOBFS_0']	326	1	1	1
AF-P0CE51-F1-model_v2_&_NOBFS_0	ALPHAFOLD	{u'b0656': 1}	92.1815	{u'b0656': {u'A': [True, 92.18150306748467]}}	[u'AF-P0CE51-F1-model_v2_&_NOBFS_0']	326	1	1	1
AF-P0CE52-F1-model_v2_&_NOBFS_0	ALPHAFOLD	{u'b1331': 1}	92.6304	{u'b1331': {u'A': [True, 92.63036809815951]}}	[u'AF-P0CE52-F1-model_v2_&_NOBFS_0']	326	1	1	1
AF-P0CE53-F1-model_v2_&_NOBFS_0	ALPHAFOLD	{u'b1994': 1}	92.3582	{u'b1994': {u'A': [True, 92.35822085889572]}}	[u'AF-P0CE53-F1-model_v2_&_NOBFS_0']	326	1	1	1
AF-P0CE54-F1-model_v2_&_NOBFS_0	ALPHAFOLD	{u'b2030': 1}	92.6142	{u'b2030': {u'A': [True, 92.61420245398774]}}	[u'AF-P0CE54-F1-model_v2_&_NOBFS_0']	326	1	1	1
AF-P0CE55-F1-model_v2_&_NOBFS_0	ALPHAFOLD	{u'b2192': 1}	92.8602	{u'b2192': {u'A': [True, 92.86015337423312]}}	[u'AF-P0CE55-F1-model_v2_&_NOBFS_0']	326	1	1	1
AF-P0CE56-F1-model_v2_&_NOBFS_0	ALPHAFOLD	{u'b2982': 1}	92.5593	{u'b2982': {u'A': [True, 92.55932515337422]}}	[u'AF-P0CE56-F1-model_v2_&_NOBFS_0']	326	1	1	1
AF-P0CE57-F1-model_v2_&_NOBFS_0	ALPHAFOLD	{u'b3218': 1}	92.4062	{u'b3218': {u'A': [True, 92.40622699386503]}}	[u'AF-P0CE57-F1-model_v2_&_NOBFS_0']	326	1	1	1
AF-P0CE58-F1-model_v2_&_NOBFS_0	ALPHAFOLD	{u'b3505': 1}	92.2076	{u'b3505': {u'A': [True, 92.20760736196318]}}	[u'AF-P0CE58-F1-model_v2_&_NOBFS_0']	326	1	1	1
AF-P0CF07-F1-model_v2_&_NOBFS_0	ALPHAFOLD	{u'b0022': 1}	90.5279	{u'b0022': {u'A': [True, 90.5279120879121]}}	[u'AF-P0CF07-F1-model_v2_&_NOBFS_0']	91	1	1	1
AF-P0CF08-F1-model_v2_&_NOBFS_0	ALPHAFOLD	{u'b0265': 1}	88.1645	{u'b0265': {u'A': [True, 88.16450549450549]}}	[u'AF-P0CF08-F1-model_v2_&_NOBFS_0']	91	1	1	1
AF-P0CF09-F1-model_v2_&_NOBFS_0	ALPHAFOLD	{u'b0275': 1}	88.8368	{u'b0275': {u'A': [True, 88.83681318681317]}}	[u'AF-P0CF09-F1-model_v2_&_NOBFS_0']	91	1	1	1
AF-P0CF10-F1-model_v2_&_NOBFS_0	ALPHAFOLD	{u'b4516': 1}	89.3802	{u'b4516': {u'A': [True, 89.38021978021978]}}	[u'AF-P0CF10-F1-model_v2_&_NOBFS_0']	91	1	1	1
AF-P0CF11-F1-model_v2_&_NOBFS_0	ALPHAFOLD	{u'b1894': 1}	89.7648	{u'b1894': {u'A': [True, 89.76483516483516]}}	[u'AF-P0CF11-F1-model_v2_&_NOBFS_0']	91	1	1	1
AF-P0CF12-F1-model_v2_&_NOBFS_0	ALPHAFOLD	{u'b3444': 1}	89.4347	{u'b3444': {u'A': [True, 89.43472527472528]}}	[u'AF-P0CF12-F1-model_v2_&_NOBFS_0']	91	1	1	1
AF-P0CF25-F1-model_v2_&_NOBFS_0	ALPHAFOLD	{u'b0021': 1}	87.3967	{u'b0021': {u'A': [True, 87.39670658682635]}}	[u'AF-P0CF25-F1-model_v2_&_NOBFS_0']	167	1	1	1
AF-P0CF26-F1-model_v2_&_NOBFS_0	ALPHAFOLD	{u'b0264': 1}	86.8995	{u'b0264': {u'A': [True, 86.89946107784431]}}	[u'AF-P0CF26-F1-model_v2_&_NOBFS_0']	167	1	1	1
AF-P0CF27-F1-model_v2_&_NOBFS_0	ALPHAFOLD	{u'b0274': 1}	87.6436	{u'b0274': {u'A': [True, 87.64359281437127]}}	[u'AF-P0CF27-F1-model_v2_&_NOBFS_0']	167	1	1	1
AF-P0CF28-F1-model_v2_&_NOBFS_0	ALPHAFOLD	{u'b1893': 1}	86.384	{u'b1893': {u'A': [True, 86.38395209580838]}}	[u'AF-P0CF28-F1-model_v2_&_NOBFS_0']	167	1	1	1
AF-P0CF29-F1-model_v2_&_NOBFS_0	ALPHAFOLD	{u'b3445': 1}	86.2695	{u'b3445': {u'A': [True, 86.26946107784431]}}	[u'AF-P0CF29-F1-model_v2_&_NOBFS_0']	167	1	1	1
AF-P0CF40-F1-model_v2_&_NOBFS_0	ALPHAFOLD	{u'b0360': 1}	81.6334	{u'b0360': {u'A': [True, 81.63338842975206]}}	[u'AF-P0CF40-F1-model_v2_&_NOBFS_0']	121	1	1	1
AF-P0CF41-F1-model_v2_&_NOBFS_0	ALPHAFOLD	{u'b1403': 1}	82.2177	{u'b1403': {u'A': [True, 82.21768595041321]}}	[u'AF-P0CF41-F1-model_v2_&_NOBFS_0']	121	1	1	1
AF-P0CF42-F1-model_v2_&_NOBFS_0	ALPHAFOLD	{u'b1997': 1}	80.3976	{u'b1997': {u'A': [True, 80.39760330578513]}}	[u'AF-P0CF42-F1-model_v2_&_NOBFS_0']	121	1	1	1
AF-P0CF43-F1-model_v2_&_NOBFS_0	ALPHAFOLD	{u'b2861': 1}	79.8644	{u'b2861': {u'A': [True, 79.86438016528926]}}	[u'AF-P0CF43-F1-model_v2_&_NOBFS_0']	121	1	1	1
AF-P0CF44-F1-model_v2_&_NOBFS_0	ALPHAFOLD	{u'b3044': 1}	80.6597	{u'b3044': {u'A': [True, 80.65966942148762]}}	[u'AF-P0CF44-F1-model_v2_&_NOBFS_0']	121	1	1	1
AF-P0CF45-F1-model_v2_&_NOBFS_0	ALPHAFOLD	{u'b4272': 1}	83.066	{u'b4272': {u'A': [True, 83.06603305785126]}}	[u'AF-P0CF45-F1-model_v2_&_NOBFS_0']	121	1	1	1
AF-P0CF53-F1-model_v2_&_NOBFS_0	ALPHAFOLD	{u'b0361': 1}	86.9719	{u'b0361': {u'A': [True, 86.9718604651163]}}	[u'AF-P0CF53-F1-model_v2_&_NOBFS_0']	301	1	1	1
AF-P0CF54-F1-model_v2_&_NOBFS_0	ALPHAFOLD	{u'b1402': 1}	86.7508	{u'b1402': {u'A': [True, 86.75079734219268]}}	[u'AF-P0CF54-F1-model_v2_&_NOBFS_0']	301	1	1	1
AF-P0CF55-F1-model_v2_&_NOBFS_0	ALPHAFOLD	{u'b1996': 1}	86.4597	{u'b1996': {u'A': [True, 86.45966777408638]}}	[u'AF-P0CF55-F1-model_v2_&_NOBFS_0']	301	1	1	1
AF-P0CF56-F1-model_v2_&_NOBFS_0	ALPHAFOLD	{u'b2860': 1}	86.5858	{u'b2860': {u'A': [True, 86.58581395348838]}}	[u'AF-P0CF56-F1-model_v2_&_NOBFS_0']	301	1	1	1
AF-P0CF57-F1-model_v2_&_NOBFS_0	ALPHAFOLD	{u'b3045': 1}	86.3539	{u'b3045': {u'A': [True, 86.35388704318937]}}	[u'AF-P0CF57-F1-model_v2_&_NOBFS_0']	301	1	1	1
AF-P0CF58-F1-model_v2_&_NOBFS_0	ALPHAFOLD	{u'b4273': 1}	86.2316	{u'b4273': {u'A': [True, 86.23156146179402]}}	[u'AF-P0CF58-F1-model_v2_&_NOBFS_0']	301	1	1	1
AF-P0CF60-F1-model_v2_&_NOBFS_0	ALPHAFOLD	{u'b1578': 1}	84.704	{u'b1578': {u'A': [True, 84.70403669724772]}}	[u'AF-P0CF60-F1-model_v2_&_NOBFS_0']	218	1	1	1
AF-P0CF66-F1-model_v2_&_NOBFS_0	ALPHAFOLD	{u'b0298': 1}	91.4574	{u'b0298': {u'A': [True, 91.4573737373737]}}	[u'AF-P0CF66-F1-model_v2_&_NOBFS_0']	99	1	1	1
AF-P0CF67-F1-model_v2_&_NOBFS_0	ALPHAFOLD	{u'b0373': 1}	91.6139	{u'b0373': {u'A': [True, 91.61393939393938]}}	[u'AF-P0CF67-F1-model_v2_&_NOBFS_0']	99	1	1	1
AF-P0CF68-F1-model_v2_&_NOBFS_0	ALPHAFOLD	{u'b0540': 1}	91.5333	{u'b0540': {u'A': [True, 91.53333333333335]}}	[u'AF-P0CF68-F1-model_v2_&_NOBFS_0']	99	1	1	1
AF-P0CF69-F1-model_v2_&_NOBFS_0	ALPHAFOLD	{u'b1027': 1}	91.6127	{u'b1027': {u'A': [True, 91.61272727272728]}}	[u'AF-P0CF69-F1-model_v2_&_NOBFS_0']	99	1	1	1
AF-P0CF70-F1-model_v2_&_NOBFS_0	ALPHAFOLD	{u'b2088': 1}	91.4	{u'b2088': {u'A': [True, 91.39999999999999]}}	[u'AF-P0CF70-F1-model_v2_&_NOBFS_0']	99	1	1	1
AF-P0CF79-F1-model_v2_&_NOBFS_0	ALPHAFOLD	{u'b0299': 1}	91.8764	{u'b0299': {u'A': [True, 91.87635416666666]}}	[u'AF-P0CF79-F1-model_v2_&_NOBFS_0']	288	1	1	1
AF-P0CF80-F1-model_v2_&_NOBFS_0	ALPHAFOLD	{u'b0372': 1}	91.5722	{u'b0372': {u'A': [True, 91.57222222222222]}}	[u'AF-P0CF80-F1-model_v2_&_NOBFS_0']	288	1	1	1
AF-P0CF81-F1-model_v2_&_NOBFS_0	ALPHAFOLD	{u'b0541': 1}	91.954	{u'b0541': {u'A': [True, 91.95402777777777]}}	[u'AF-P0CF81-F1-model_v2_&_NOBFS_0']	288	1	1	1
AF-P0CF82-F1-model_v2_&_NOBFS_0	ALPHAFOLD	{u'b1026': 1}	91.4436	{u'b1026': {u'A': [True, 91.44361111111111]}}	[u'AF-P0CF82-F1-model_v2_&_NOBFS_0']	288	1	1	1
AF-P0CF83-F1-model_v2_&_NOBFS_0	ALPHAFOLD	{u'b2089': 1}	91.7722	{u'b2089': {u'A': [True, 91.7721875]}}	[u'AF-P0CF83-F1-model_v2_&_NOBFS_0']	288	1	1	1
AF-P0CF86-F1-model_v2_&_NOBFS_0	ALPHAFOLD	{u'b2638': 1}	61.6008	{u'b2638': {u'A': [True, 61.60076923076924]}}	[u'AF-P0CF86-F1-model_v2_&_NOBFS_0']	104	1	1	1
AF-P0CF88-F1-model_v2_&_NOBFS_0	ALPHAFOLD	{u'b0256': 1}	87.7975	{u'b0256': {u'A': [True, 87.79754569190601]}}	[u'AF-P0CF88-F1-model_v2_&_NOBFS_0']	383	1	1	1
AF-P0CF89-F1-model_v2_&_NOBFS_0	ALPHAFOLD	{u'b1404': 1}	88.6353	{u'b1404': {u'A': [True, 88.6353002610966]}}	[u'AF-P0CF89-F1-model_v2_&_NOBFS_0']	383	1	1	1
AF-P0CF90-F1-model_v2_&_NOBFS_0	ALPHAFOLD	{u'b4284': 1}	89.0207	{u'b4284': {u'A': [True, 89.02070496083552]}}	[u'AF-P0CF90-F1-model_v2_&_NOBFS_0']	383	1	1	1
AF-P0CF91-F1-model_v2_&_NOBFS_0	ALPHAFOLD	{u'b0016': 1}	85.9658	{u'b0016': {u'A': [True, 85.96581081081081]}}	[u'AF-P0CF91-F1-model_v2_&_NOBFS_0']	370	1	1	1
AF-P0CF92-F1-model_v2_&_NOBFS_0	ALPHAFOLD	{u'b0582': 1}	86.796	{u'b0582': {u'A': [True, 86.796]}}	[u'AF-P0CF92-F1-model_v2_&_NOBFS_0']	370	1	1	1
AF-P0CF93-F1-model_v2_&_NOBFS_0	ALPHAFOLD	{u'b2394': 1}	85.9788	{u'b2394': {u'A': [True, 85.97883783783783]}}	[u'AF-P0CF93-F1-model_v2_&_NOBFS_0']	370	1	1	1
AF-P0CG19-F1-model_v2_&_NOBFS_0	ALPHAFOLD	{u'b3643': 1}	95.2777	{u'b3643': {u'A': [True, 95.27767543859648]}}	[u'AF-P0CG19-F1-model_v2_&_NOBFS_0']	228	1	1	1
AF-P0CI31-F1-model_v2_&_NOBFS_0	ALPHAFOLD	{u'b2541': 1}	96.4818	{u'b2541': {u'A': [True, 96.48177777777778]}}	[u'AF-P0CI31-F1-model_v2_&_NOBFS_0']	270	1	1	1
AF-P0CK95-F1-model_v2_&_NOBFS_0	ALPHAFOLD	{u'b4466': 1}	80.819	{u'b4466': {u'A': [True, 80.81900657894735]}}	[u'AF-P0CK95-F1-model_v2_&_NOBFS_0']	1520	1	1	1
AF-P0DKB3-F1-model_v2_&_NOBFS_0	ALPHAFOLD	{u'b4705': 1}	70.4117	{u'b4705': {u'A': [True, 70.41166666666666]}}	[u'AF-P0DKB3-F1-model_v2_&_NOBFS_0']	42	1	1	1
AF-P0DM85-F1-model_v2_&_NOBFS_0	ALPHAFOLD	{u'b4109': 1}	78.172	{u'b4109': {u'A': [True, 78.17199460916443]}}	[u'AF-P0DM85-F1-model_v2_&_NOBFS_0']	742	1	1	1
AF-P0DMC5-F1-model_v2_&_NOBFS_0	ALPHAFOLD	{u'b2218': 1}	78.8547	{u'b2218': {u'A': [True, 78.85473129610115]}}	[u'AF-P0DMC5-F1-model_v2_&_NOBFS_0']	949	1	1	1
AF-P0DMC7-F1-model_v2_&_NOBFS_0	ALPHAFOLD	{u'b2217': 1}	88.6112	{u'b2217': {u'A': [True, 88.61125]}}	[u'AF-P0DMC7-F1-model_v2_&_NOBFS_0']	216	1	1	1
AF-P0DMC9-F1-model_v2_&_NOBFS_0	ALPHAFOLD	{u'b1951': 1}	91.2539	{u'b1951': {u'A': [True, 91.25386473429951]}}	[u'AF-P0DMC9-F1-model_v2_&_NOBFS_0']	207	1	1	1
AF-P0DN74-F1-model_v2_&_NOBFS_0	ALPHAFOLD	{u'b4715': 1}	93.5129	{u'b4715': {u'A': [True, 93.51294117647059]}}	[u'AF-P0DN74-F1-model_v2_&_NOBFS_0']	85	1	1	1
AF-P0DP21-F1-model_v2_&_NOBFS_0	ALPHAFOLD	{u'b4584': 1}	80.1218	{u'b4584': {u'A': [True, 80.12184466019418]}}	[u'AF-P0DP21-F1-model_v2_&_NOBFS_0']	103	1	1	1
AF-P0DP63-F1-model_v2_&_NOBFS_0	ALPHAFOLD	{u'b4581': 1}	90.4344	{u'b4581': {u'A': [True, 90.43440000000001]}}	[u'AF-P0DP63-F1-model_v2_&_NOBFS_0']	75	1	1	1
AF-P0DP69-F1-model_v2_&_NOBFS_0	ALPHAFOLD	{u'b4583': 1}	71.6464	{u'b4583': {u'A': [True, 71.6464077669903]}}	[u'AF-P0DP69-F1-model_v2_&_NOBFS_0']	206	1	1	1
AF-P0DP89-F1-model_v2_&_NOBFS_0	ALPHAFOLD	{u'b4488': 1}	96.1883	{u'b4488': {u'A': [True, 96.1882874617737]}}	[u'AF-P0DP89-F1-model_v2_&_NOBFS_0']	327	1	1	1
AF-P0DPC4-F1-model_v2_&_NOBFS_0	ALPHAFOLD	{u'b4720': 1}	86.4573	{u'b4720': {u'A': [True, 86.45727272727274]}}	[u'AF-P0DPC4-F1-model_v2_&_NOBFS_0']	33	1	1	1
AF-P0DPC5-F1-model_v2_&_NOBFS_0	ALPHAFOLD	{u'b4721': 1}	62.0777	{u'b4721': {u'A': [True, 62.077659574468086]}}	[u'AF-P0DPC5-F1-model_v2_&_NOBFS_0']	47	1	1	1
AF-P0DPC6-F1-model_v2_&_NOBFS_0	ALPHAFOLD	{u'b4722': 1}	69.5559	{u'b4722': {u'A': [True, 69.55592592592593]}}	[u'AF-P0DPC6-F1-model_v2_&_NOBFS_0']	27	1	1	1
AF-P0DPC7-F1-model_v2_&_NOBFS_0	ALPHAFOLD	{u'b4725': 1}	74.8014	{u'b4725': {u'A': [True, 74.8013725490196]}}	[u'AF-P0DPC7-F1-model_v2_&_NOBFS_0']	51	1	1	1
AF-P0DPC8-F1-model_v2_&_NOBFS_0	ALPHAFOLD	{u'b4723': 1}	77.9502	{u'b4723': {u'A': [True, 77.95016129032258]}}	[u'AF-P0DPC8-F1-model_v2_&_NOBFS_0']	62	1	1	1
AF-P0DPC9-F1-model_v2_&_NOBFS_0	ALPHAFOLD	{u'b4724': 1}	80.6606	{u'b4724': {u'A': [True, 80.66064516129032]}}	[u'AF-P0DPC9-F1-model_v2_&_NOBFS_0']	62	1	1	1
AF-P0DPD0-F1-model_v2_&_NOBFS_0	ALPHAFOLD	{u'b4419': 1}	94.638	{u'b4419': {u'A': [True, 94.63799999999999]}}	[u'AF-P0DPD0-F1-model_v2_&_NOBFS_0']	35	1	1	1
AF-P0DPD1-F1-model_v2_&_NOBFS_0	ALPHAFOLD	{u'b4423': 1}	94.2534	{u'b4423': {u'A': [True, 94.25342857142857]}}	[u'AF-P0DPD1-F1-model_v2_&_NOBFS_0']	35	1	1	1
AF-P0DPM7-F1-model_v2_&_NOBFS_0	ALPHAFOLD	{u'b4728': 1}	65.5305	{u'b4728': {u'A': [True, 65.53047619047618]}}	[u'AF-P0DPM7-F1-model_v2_&_NOBFS_0']	21	1	1	1
AF-P0DPM8-F1-model_v2_&_NOBFS_0	ALPHAFOLD	{u'b4688': 1}	82.6707	{u'b4688': {u'A': [True, 82.67071428571428]}}	[u'AF-P0DPM8-F1-model_v2_&_NOBFS_0']	42	1	1	1
AF-P0DPM9-F1-model_v2_&_NOBFS_0	ALPHAFOLD	{u'b4729': 1}	79.2015	{u'b4729': {u'A': [True, 79.20148648648649]}}	[u'AF-P0DPM9-F1-model_v2_&_NOBFS_0']	74	1	1	1
AF-P0DPN0-F1-model_v2_&_NOBFS_0	ALPHAFOLD	{u'b4730': 1}	94.3692	{u'b4730': {u'A': [True, 94.36916666666666]}}	[u'AF-P0DPN0-F1-model_v2_&_NOBFS_0']	24	1	1	1
AF-P0DPN1-F1-model_v2_&_NOBFS_0	ALPHAFOLD	{u'b4731': 1}	85.9572	{u'b4731': {u'A': [True, 85.95717948717947]}}	[u'AF-P0DPN1-F1-model_v2_&_NOBFS_0']	39	1	1	1
AF-P0DPN2-F1-model_v2_&_NOBFS_0	ALPHAFOLD	{u'b4732': 1}	90.1833	{u'b4732': {u'A': [True, 90.18333333333334]}}	[u'AF-P0DPN2-F1-model_v2_&_NOBFS_0']	27	1	1	1
AF-P0DPN3-F1-model_v2_&_NOBFS_0	ALPHAFOLD	{u'b4733': 1}	90.6239	{u'b4733': {u'A': [True, 90.62387755102043]}}	[u'AF-P0DPN3-F1-model_v2_&_NOBFS_0']	49	1	1	1
AF-P0DPN4-F1-model_v2_&_NOBFS_0	ALPHAFOLD	{u'b4734': 1}	95.6828	{u'b4734': {u'A': [True, 95.68275862068964]}}	[u'AF-P0DPN4-F1-model_v2_&_NOBFS_0']	29	1	1	1
AF-P0DPN5-F1-model_v2_&_NOBFS_0	ALPHAFOLD	{u'b4735': 1}	58.4591	{u'b4735': {u'A': [True, 58.45914285714286]}}	[u'AF-P0DPN5-F1-model_v2_&_NOBFS_0']	35	1	1	1
AF-P0DPN6-F1-model_v2_&_NOBFS_0	ALPHAFOLD	{u'b4736': 1}	70.5176	{u'b4736': {u'A': [True, 70.51761904761906]}}	[u'AF-P0DPN6-F1-model_v2_&_NOBFS_0']	21	1	1	1
AF-P0DPN9-F1-model_v2_&_NOBFS_0	ALPHAFOLD	{u'b4739': 1}	87.2311	{u'b4739': {u'A': [True, 87.23111111111113]}}	[u'AF-P0DPN9-F1-model_v2_&_NOBFS_0']	36	1	1	1
AF-P0DPO0-F1-model_v2_&_NOBFS_0	ALPHAFOLD	{u'b4740': 1}	61.0318	{u'b4740': {u'A': [True, 61.03179104477612]}}	[u'AF-P0DPO0-F1-model_v2_&_NOBFS_0']	67	1	1	1
AF-P0DPO1-F1-model_v2_&_NOBFS_0	ALPHAFOLD	{u'b4741': 1}	85.8352	{u'b4741': {u'A': [True, 85.83516129032256]}}	[u'AF-P0DPO1-F1-model_v2_&_NOBFS_0']	31	1	1	1
AF-P0DPO2-F1-model_v2_&_NOBFS_0	ALPHAFOLD	{u'b4742': 1}	59.3233	{u'b4742': {u'A': [True, 59.32333333333332]}}	[u'AF-P0DPO2-F1-model_v2_&_NOBFS_0']	54	1	1	1
AF-P0DPO3-F1-model_v2_&_NOBFS_0	ALPHAFOLD	{u'b4743': 1}	78.4575	{u'b4743': {u'A': [True, 78.4575438596491]}}	[u'AF-P0DPO3-F1-model_v2_&_NOBFS_0']	57	1	1	1
AF-P0DPO4-F1-model_v2_&_NOBFS_0	ALPHAFOLD	{u'b4744': 1}	86.9059	{u'b4744': {u'A': [True, 86.90594594594596]}}	[u'AF-P0DPO4-F1-model_v2_&_NOBFS_0']	37	1	1	1
AF-P0DPO5-F1-model_v2_&_NOBFS_0	ALPHAFOLD	{u'b4745': 1}	71.3815	{u'b4745': {u'A': [True, 71.38147540983607]}}	[u'AF-P0DPO5-F1-model_v2_&_NOBFS_0']	61	1	1	1
AF-P0DPO7-F1-model_v2_&_NOBFS_0	ALPHAFOLD	{u'b4747': 1}	70.784	{u'b4747': {u'A': [True, 70.784]}}	[u'AF-P0DPO7-F1-model_v2_&_NOBFS_0']	40	1	1	1
AF-P0DPO8-F1-model_v2_&_NOBFS_0	ALPHAFOLD	{u'b4748': 1}	86.4224	{u'b4748': {u'A': [True, 86.42243243243246]}}	[u'AF-P0DPO8-F1-model_v2_&_NOBFS_0']	37	1	1	1
AF-P0DPO9-F1-model_v2_&_NOBFS_0	ALPHAFOLD	{u'b4749': 1}	85.149	{u'b4749': {u'A': [True, 85.14904761904762]}}	[u'AF-P0DPO9-F1-model_v2_&_NOBFS_0']	21	1	1	1
AF-P0DPP0-F1-model_v2_&_NOBFS_0	ALPHAFOLD	{u'b4750': 1}	84.9786	{u'b4750': {u'A': [True, 84.97862068965517]}}	[u'AF-P0DPP0-F1-model_v2_&_NOBFS_0']	29	1	1	1
AF-P0DPP1-F1-model_v2_&_NOBFS_0	ALPHAFOLD	{u'b4534': 1}	73.1344	{u'b4534': {u'A': [True, 73.13444444444444]}}	[u'AF-P0DPP1-F1-model_v2_&_NOBFS_0']	36	1	1	1
AF-P0DPP2-F1-model_v2_&_NOBFS_0	ALPHAFOLD	{u'b4751': 1}	64.6631	{u'b4751': {u'A': [True, 64.66307692307693]}}	[u'AF-P0DPP2-F1-model_v2_&_NOBFS_0']	52	1	1	1
AF-P0DPP3-F1-model_v2_&_NOBFS_0	ALPHAFOLD	{u'b4752': 1}	88.8824	{u'b4752': {u'A': [True, 88.88241379310345]}}	[u'AF-P0DPP3-F1-model_v2_&_NOBFS_0']	58	1	1	1
AF-P0DPP4-F1-model_v2_&_NOBFS_0	ALPHAFOLD	{u'b4753': 1}	78.2574	{u'b4753': {u'A': [True, 78.25739130434783]}}	[u'AF-P0DPP4-F1-model_v2_&_NOBFS_0']	23	1	1	1
AF-P0DPP5-F1-model_v2_&_NOBFS_0	ALPHAFOLD	{u'b4754': 1}	86.4844	{u'b4754': {u'A': [True, 86.48444444444443]}}	[u'AF-P0DPP5-F1-model_v2_&_NOBFS_0']	27	1	1	1
AF-P0DPP6-F1-model_v2_&_NOBFS_0	ALPHAFOLD	{u'b4755': 1}	81.1057	{u'b4755': {u'A': [True, 81.10574468085106]}}	[u'AF-P0DPP6-F1-model_v2_&_NOBFS_0']	47	1	1	1
AF-P0DPP7-F1-model_v2_&_NOBFS_0	ALPHAFOLD	{u'b4756': 1}	80.9562	{u'b4756': {u'A': [True, 80.95625]}}	[u'AF-P0DPP7-F1-model_v2_&_NOBFS_0']	56	1	1	1
AF-P0DPP8-F1-model_v2_&_NOBFS_0	ALPHAFOLD	{u'b4757': 1}	67.6008	{u'b4757': {u'A': [True, 67.60076923076923]}}	[u'AF-P0DPP8-F1-model_v2_&_NOBFS_0']	26	1	1	1
AF-P10100-F1-model_v2_&_NOBFS_0	ALPHAFOLD	{u'b0633': 1}	75.9071	{u'b0633': {u'A': [True, 75.90707182320442]}}	[u'AF-P10100-F1-model_v2_&_NOBFS_0']	362	1	1	1
AF-P10121-F1-model_v2_&_NOBFS_0	ALPHAFOLD	{u'b3464': 1}	73.9155	{u'b3464': {u'A': [True, 73.91545271629779]}}	[u'AF-P10121-F1-model_v2_&_NOBFS_0']	497	1	1	1
AF-P10151-F1-model_v2_&_NOBFS_0	ALPHAFOLD	{u'b0076': 1}	90.1219	{u'b0076': {u'A': [True, 90.12191082802548]}}	[u'AF-P10151-F1-model_v2_&_NOBFS_0']	314	1	1	1
AF-P10346-F1-model_v2_&_NOBFS_0	ALPHAFOLD	{u'b0809': 1}	95.7915	{u'b0809': {u'A': [True, 95.79154166666666]}}	[u'AF-P10346-F1-model_v2_&_NOBFS_0']	240	1	1	1
AF-P10371-F1-model_v2_&_NOBFS_0	ALPHAFOLD	{u'b2024': 1}	96.1044	{u'b2024': {u'A': [True, 96.10444897959185]}}	[u'AF-P10371-F1-model_v2_&_NOBFS_0']	245	1	1	1
AF-P10378-F1-model_v2_&_NOBFS_0	ALPHAFOLD	{u'b0594': 1}	93.8947	{u'b0594': {u'A': [True, 93.89472014925371]}}	[u'AF-P10378-F1-model_v2_&_NOBFS_0']	536	1	1	1
AF-P10384-F1-model_v2_&_NOBFS_0	ALPHAFOLD	{u'b2344': 1}	93.4309	{u'b2344': {u'A': [True, 93.43089686098655]}}	[u'AF-P10384-F1-model_v2_&_NOBFS_0']	446	1	1	1
AF-P10408-F1-model_v2_&_NOBFS_0	ALPHAFOLD	{u'b0098': 1}	86.46	{u'b0098': {u'A': [True, 86.46002219755827]}}	[u'AF-P10408-F1-model_v2_&_NOBFS_0']	901	1	1	1
AF-P10423-F1-model_v2_&_NOBFS_0	ALPHAFOLD	{u'b2753': 1}	94.2741	{u'b2753': {u'A': [True, 94.27411594202898]}}	[u'AF-P10423-F1-model_v2_&_NOBFS_0']	345	1	1	1
AF-P10441-F1-model_v2_&_NOBFS_0	ALPHAFOLD	{u'b0182': 1}	94.5292	{u'b0182': {u'A': [True, 94.52918848167539]}}	[u'AF-P10441-F1-model_v2_&_NOBFS_0']	382	1	1	1
AF-P10442-F1-model_v2_&_NOBFS_0	ALPHAFOLD	{u'b0183': 1}	95.4902	{u'b0183': {u'A': [True, 95.49015151515152]}}	[u'AF-P10442-F1-model_v2_&_NOBFS_0']	198	1	1	1
AF-P10443-F1-model_v2_&_NOBFS_0	ALPHAFOLD	{u'b0184': 1}	89.0059	{u'b0184': {u'A': [True, 89.00594827586207]}}	[u'AF-P10443-F1-model_v2_&_NOBFS_0']	1160	1	1	1
AF-P10805-F1-model_v2_&_NOBFS_0	ALPHAFOLD	{u'b0566': 1}	90.3828	{u'b0566': {u'A': [True, 90.38280632411066]}}	[u'AF-P10805-F1-model_v2_&_NOBFS_0']	253	1	1	1
AF-P10902-F1-model_v2_&_NOBFS_0	ALPHAFOLD	{u'b2574': 1}	94.2811	{u'b2574': {u'A': [True, 94.28111111111112]}}	[u'AF-P10902-F1-model_v2_&_NOBFS_0']	540	1	1	1
AF-P10903-F1-model_v2_&_NOBFS_0	ALPHAFOLD	{u'b1223': 1}	92.5977	{u'b1223': {u'A': [True, 92.59768898488122]}}	[u'AF-P10903-F1-model_v2_&_NOBFS_0']	463	1	1	1
AF-P10905-F1-model_v2_&_NOBFS_0	ALPHAFOLD	{u'b3452': 1}	88.2513	{u'b3452': {u'A': [True, 88.25125423728815]}}	[u'AF-P10905-F1-model_v2_&_NOBFS_0']	295	1	1	1
AF-P10906-F1-model_v2_&_NOBFS_0	ALPHAFOLD	{u'b3451': 1}	91.8157	{u'b3451': {u'A': [True, 91.81565836298934]}}	[u'AF-P10906-F1-model_v2_&_NOBFS_0']	281	1	1	1
AF-P10907-F1-model_v2_&_NOBFS_0	ALPHAFOLD	{u'b3450': 1}	94.7081	{u'b3450': {u'A': [True, 94.70806179775283]}}	[u'AF-P10907-F1-model_v2_&_NOBFS_0']	356	1	1	1
AF-P10908-F1-model_v2_&_NOBFS_0	ALPHAFOLD	{u'b3449': 1}	97.8815	{u'b3449': {u'A': [True, 97.8814979757085]}}	[u'AF-P10908-F1-model_v2_&_NOBFS_0']	247	1	1	1
AF-P11071-F1-model_v2_&_NOBFS_0	ALPHAFOLD	{u'b4016': 1}	93.8715	{u'b4016': {u'A': [True, 93.8714705882353]}}	[u'AF-P11071-F1-model_v2_&_NOBFS_0']	578	1	1	1
AF-P11072-F1-model_v2_&_NOBFS_0	ALPHAFOLD	{u'b1139': 1}	89.7455	{u'b1139': {u'A': [True, 89.74552188552188]}}	[u'AF-P11072-F1-model_v2_&_NOBFS_0']	297	1	1	1
AF-P11286-F1-model_v2_&_NOBFS_0	ALPHAFOLD	{u'b3563': 1}	88.3681	{u'b3563': {u'A': [True, 88.36805309734515]}}	[u'AF-P11286-F1-model_v2_&_NOBFS_0']	113	1	1	1
AF-P11289-F1-model_v2_&_NOBFS_0	ALPHAFOLD	{u'b2602': 1}	86.7492	{u'b2602': {u'A': [True, 86.74917355371902]}}	[u'AF-P11289-F1-model_v2_&_NOBFS_0']	121	1	1	1
AF-P11290-F1-model_v2_&_NOBFS_0	ALPHAFOLD	{u'b3615': 1}	94.1285	{u'b3615': {u'A': [True, 94.1284593023256]}}	[u'AF-P11290-F1-model_v2_&_NOBFS_0']	344	1	1	1
AF-P11291-F1-model_v2_&_NOBFS_0	ALPHAFOLD	{u'b3808': 1}	41.8528	{u'b3808': {u'A': [False, 41.8527950310559]}}	[u'AF-P11291-F1-model_v2_&_NOBFS_0']	161	0	1	1
AF-P11349-F1-model_v2_&_NOBFS_0	ALPHAFOLD	{u'b1225': 1}	96.8302	{u'b1225': {u'A': [True, 96.83021484375]}}	[u'AF-P11349-F1-model_v2_&_NOBFS_0']	512	1	1	1
AF-P11350-F1-model_v2_&_NOBFS_0	ALPHAFOLD	{u'b1227': 1}	97.6301	{u'b1227': {u'A': [True, 97.63013333333333]}}	[u'AF-P11350-F1-model_v2_&_NOBFS_0']	225	1	1	1
AF-P11446-F1-model_v2_&_NOBFS_0	ALPHAFOLD	{u'b3958': 1}	98.441	{u'b3958': {u'A': [True, 98.4409880239521]}}	[u'AF-P11446-F1-model_v2_&_NOBFS_0']	334	1	1	1
AF-P11447-F1-model_v2_&_NOBFS_0	ALPHAFOLD	{u'b3960': 1}	95.7235	{u'b3960': {u'A': [True, 95.72352297593]}}	[u'AF-P11447-F1-model_v2_&_NOBFS_0']	457	1	1	1
AF-P11454-F1-model_v2_&_NOBFS_0	ALPHAFOLD	{u'b0586': 1}	88.3945	{u'b0586': {u'A': [True, 88.3945011600928]}}	[u'AF-P11454-F1-model_v2_&_NOBFS_0']	1293	1	1	1
AF-P11458-F1-model_v2_&_NOBFS_0	ALPHAFOLD	{u'b0750': 1}	93.1485	{u'b0750': {u'A': [True, 93.148530259366]}}	[u'AF-P11458-F1-model_v2_&_NOBFS_0']	347	1	1	1
AF-P11551-F1-model_v2_&_NOBFS_0	ALPHAFOLD	{u'b2801': 1}	87.424	{u'b2801': {u'A': [True, 87.4240410958904]}}	[u'AF-P11551-F1-model_v2_&_NOBFS_0']	438	1	1	1
AF-P11553-F1-model_v2_&_NOBFS_0	ALPHAFOLD	{u'b2803': 1}	95.6776	{u'b2803': {u'A': [True, 95.67760593220339]}}	[u'AF-P11553-F1-model_v2_&_NOBFS_0']	472	1	1	1
AF-P11557-F1-model_v2_&_NOBFS_0	ALPHAFOLD	{u'b3388': 1}	59.5817	{u'b3388': {u'A': [True, 59.58168224299066]}}	[u'AF-P11557-F1-model_v2_&_NOBFS_0']	428	1	1	1
AF-P11663-F1-model_v2_&_NOBFS_0	ALPHAFOLD	{u'b2929': 1}	93.4339	{u'b2929': {u'A': [True, 93.43390532544377]}}	[u'AF-P11663-F1-model_v2_&_NOBFS_0']	169	1	1	1
AF-P11664-F1-model_v2_&_NOBFS_0	ALPHAFOLD	{u'b2928': 1}	95.8264	{u'b2928': {u'A': [True, 95.8264135021097]}}	[u'AF-P11664-F1-model_v2_&_NOBFS_0']	237	1	1	1
AF-P11667-F1-model_v2_&_NOBFS_0	ALPHAFOLD	{u'b2923': 1}	87.2307	{u'b2923': {u'A': [True, 87.230663507109]}}	[u'AF-P11667-F1-model_v2_&_NOBFS_0']	211	1	1	1
AF-P11864-F1-model_v2_&_NOBFS_0	ALPHAFOLD	{u'b3121': 1}	54.0873	{u'b3121': {u'A': [True, 54.087291139240506]}}	[u'AF-P11864-F1-model_v2_&_NOBFS_0']	395	1	1	1
AF-P11865-F1-model_v2_&_NOBFS_0	ALPHAFOLD	{u'b3120': 1}	37.2351	{u'b3120': {u'A': [False, 37.235083798882684]}}	[u'AF-P11865-F1-model_v2_&_NOBFS_0']	179	0	1	1
AF-P11866-F1-model_v2_&_NOBFS_0	ALPHAFOLD	{u'b3119': 1}	48.6436	{u'b3119': {u'A': [False, 48.64361111111111]}}	[u'AF-P11866-F1-model_v2_&_NOBFS_0']	72	0	1	1
AF-P11868-F1-model_v2_&_NOBFS_0	ALPHAFOLD	{u'b3115': 1}	95.4263	{u'b3115': {u'A': [True, 95.42631840796021]}}	[u'AF-P11868-F1-model_v2_&_NOBFS_0']	402	1	1	1
AF-P11875-F1-model_v2_&_NOBFS_0	ALPHAFOLD	{u'b1876': 1}	94.1048	{u'b1876': {u'A': [True, 94.10478336221837]}}	[u'AF-P11875-F1-model_v2_&_NOBFS_0']	577	1	1	1
AF-P11880-F1-model_v2_&_NOBFS_0	ALPHAFOLD	{u'b0086': 1}	95.4877	{u'b0086': {u'A': [True, 95.48772123893805]}}	[u'AF-P11880-F1-model_v2_&_NOBFS_0']	452	1	1	1
AF-P11988-F1-model_v2_&_NOBFS_0	ALPHAFOLD	{u'b3721': 1}	95.4116	{u'b3721': {u'A': [True, 95.4115744680851]}}	[u'AF-P11988-F1-model_v2_&_NOBFS_0']	470	1	1	1
AF-P11989-F1-model_v2_&_NOBFS_0	ALPHAFOLD	{u'b3723': 1}	92.0725	{u'b3723': {u'A': [True, 92.0725179856115]}}	[u'AF-P11989-F1-model_v2_&_NOBFS_0']	278	1	1	1
AF-P12008-F1-model_v2_&_NOBFS_0	ALPHAFOLD	{u'b2329': 1}	94.6352	{u'b2329': {u'A': [True, 94.63523545706371]}}	[u'AF-P12008-F1-model_v2_&_NOBFS_0']	361	1	1	1
AF-P12281-F1-model_v2_&_NOBFS_0	ALPHAFOLD	{u'b0827': 1}	94.9092	{u'b0827': {u'A': [True, 94.9092214111922]}}	[u'AF-P12281-F1-model_v2_&_NOBFS_0']	411	1	1	1
AF-P12282-F1-model_v2_&_NOBFS_0	ALPHAFOLD	{u'b0826': 1}	95.3486	{u'b0826': {u'A': [True, 95.34855421686746]}}	[u'AF-P12282-F1-model_v2_&_NOBFS_0']	249	1	1	1
AF-P12295-F1-model_v2_&_NOBFS_0	ALPHAFOLD	{u'b2580': 1}	95.9149	{u'b2580': {u'A': [True, 95.91489082969433]}}	[u'AF-P12295-F1-model_v2_&_NOBFS_0']	229	1	1	1
AF-P12758-F1-model_v2_&_NOBFS_0	ALPHAFOLD	{u'b3831': 1}	96.7287	{u'b3831': {u'A': [True, 96.72873517786562]}}	[u'AF-P12758-F1-model_v2_&_NOBFS_0']	253	1	1	1
AF-P12994-F1-model_v2_&_NOBFS_0	ALPHAFOLD	{u'b0773': 1}	97.9456	{u'b0773': {u'A': [True, 97.94556962025317]}}	[u'AF-P12994-F1-model_v2_&_NOBFS_0']	158	1	1	1
AF-P12995-F1-model_v2_&_NOBFS_0	ALPHAFOLD	{u'b0774': 1}	98.3449	{u'b0774': {u'A': [True, 98.34491841491841]}}	[u'AF-P12995-F1-model_v2_&_NOBFS_0']	429	1	1	1
AF-P12996-F1-model_v2_&_NOBFS_0	ALPHAFOLD	{u'b0775': 1}	91.2336	{u'b0775': {u'A': [True, 91.233612716763]}}	[u'AF-P12996-F1-model_v2_&_NOBFS_0']	346	1	1	1
AF-P12998-F1-model_v2_&_NOBFS_0	ALPHAFOLD	{u'b0776': 1}	96.9753	{u'b0776': {u'A': [True, 96.97531250000002]}}	[u'AF-P12998-F1-model_v2_&_NOBFS_0']	384	1	1	1
AF-P12999-F1-model_v2_&_NOBFS_0	ALPHAFOLD	{u'b0777': 1}	94.7393	{u'b0777': {u'A': [True, 94.73928286852589]}}	[u'AF-P12999-F1-model_v2_&_NOBFS_0']	251	1	1	1
AF-P13000-F1-model_v2_&_NOBFS_0	ALPHAFOLD	{u'b0778': 1}	97.2424	{u'b0778': {u'A': [True, 97.24235555555555]}}	[u'AF-P13000-F1-model_v2_&_NOBFS_0']	225	1	1	1
AF-P13001-F1-model_v2_&_NOBFS_0	ALPHAFOLD	{u'b3412': 1}	95.7083	{u'b3412': {u'A': [True, 95.70832031249999]}}	[u'AF-P13001-F1-model_v2_&_NOBFS_0']	256	1	1	1
AF-P13009-F1-model_v2_&_NOBFS_0	ALPHAFOLD	{u'b4019': 1}	91.296	{u'b4019': {u'A': [True, 91.2959576202119]}}	[u'AF-P13009-F1-model_v2_&_NOBFS_0']	1227	1	1	1
AF-P13016-F1-model_v2_&_NOBFS_0	ALPHAFOLD	{u'b0110': 1}	97.2068	{u'b0110': {u'A': [True, 97.20677595628415]}}	[u'AF-P13016-F1-model_v2_&_NOBFS_0']	183	1	1	1
AF-P13024-F1-model_v2_&_NOBFS_0	ALPHAFOLD	{u'b3891': 1}	92.0831	{u'b3891': {u'A': [True, 92.08313915857606]}}	[u'AF-P13024-F1-model_v2_&_NOBFS_0']	309	1	1	1
AF-P13029-F1-model_v2_&_NOBFS_0	ALPHAFOLD	{u'b3942': 1}	95.545	{u'b3942': {u'A': [True, 95.54497245179063]}}	[u'AF-P13029-F1-model_v2_&_NOBFS_0']	726	1	1	1
AF-P13033-F1-model_v2_&_NOBFS_0	ALPHAFOLD	{u'b2242': 1}	95.6075	{u'b2242': {u'A': [True, 95.60754176610978]}}	[u'AF-P13033-F1-model_v2_&_NOBFS_0']	419	1	1	1
AF-P13035-F1-model_v2_&_NOBFS_0	ALPHAFOLD	{u'b3426': 1}	95.6592	{u'b3426': {u'A': [True, 95.65918163672654]}}	[u'AF-P13035-F1-model_v2_&_NOBFS_0']	501	1	1	1
AF-P13036-F1-model_v2_&_NOBFS_0	ALPHAFOLD	{u'b4291': 1}	89.4848	{u'b4291': {u'A': [True, 89.4847803617571]}}	[u'AF-P13036-F1-model_v2_&_NOBFS_0']	774	1	1	1
AF-P13039-F1-model_v2_&_NOBFS_0	ALPHAFOLD	{u'b0585': 1}	94.9726	{u'b0585': {u'A': [True, 94.97259999999999]}}	[u'AF-P13039-F1-model_v2_&_NOBFS_0']	400	1	1	1
AF-P13445-F1-model_v2_&_NOBFS_0	ALPHAFOLD	{u'b2741': 1}	82.4563	{u'b2741': {u'A': [True, 82.45630303030303]}}	[u'AF-P13445-F1-model_v2_&_NOBFS_0']	330	1	1	1
AF-P13458-F1-model_v2_&_NOBFS_0	ALPHAFOLD	{u'b0397': 1}	83.2333	{u'b0397': {u'A': [True, 83.23326335877861]}}	[u'AF-P13458-F1-model_v2_&_NOBFS_0']	1048	1	1	1
AF-P13482-F1-model_v2_&_NOBFS_0	ALPHAFOLD	{u'b1197': 1}	92.3	{u'b1197': {u'A': [True, 92.2999646017699]}}	[u'AF-P13482-F1-model_v2_&_NOBFS_0']	565	1	1	1
AF-P13518-F1-model_v2_&_NOBFS_0	ALPHAFOLD	{u'b3252': 1}	85.8822	{u'b3252': {u'A': [True, 85.88224458204334]}}	[u'AF-P13518-F1-model_v2_&_NOBFS_0']	646	1	1	1
AF-P13656-F1-model_v2_&_NOBFS_0	ALPHAFOLD	{u'b3338': 1}	79.8264	{u'b3338': {u'A': [True, 79.82639910813823]}}	[u'AF-P13656-F1-model_v2_&_NOBFS_0']	897	1	1	1
AF-P13669-F1-model_v2_&_NOBFS_0	ALPHAFOLD	{u'b0730': 1}	86.9361	{u'b0730': {u'A': [True, 86.93612499999999]}}	[u'AF-P13669-F1-model_v2_&_NOBFS_0']	240	1	1	1
AF-P13738-F1-model_v2_&_NOBFS_0	ALPHAFOLD	{u'b0019': 1}	89.3625	{u'b0019': {u'A': [True, 89.36247422680412]}}	[u'AF-P13738-F1-model_v2_&_NOBFS_0']	388	1	1	1
AF-P13857-F1-model_v2_&_NOBFS_0	ALPHAFOLD	{u'b1427': 1}	97.0107	{u'b1427': {u'A': [True, 97.01067039106147]}}	[u'AF-P13857-F1-model_v2_&_NOBFS_0']	179	1	1	1
AF-P14081-F1-model_v2_&_NOBFS_0	ALPHAFOLD	{u'b3590': 1}	85.5403	{u'b3590': {u'A': [True, 85.54027687296417]}}	[u'AF-P14081-F1-model_v2_&_NOBFS_0']	614	1	1	1
AF-P14175-F1-model_v2_&_NOBFS_0	ALPHAFOLD	{u'b2677': 1}	90.243	{u'b2677': {u'A': [True, 90.24305]}}	[u'AF-P14175-F1-model_v2_&_NOBFS_0']	400	1	1	1
AF-P14176-F1-model_v2_&_NOBFS_0	ALPHAFOLD	{u'b2678': 1}	83.312	{u'b2678': {u'A': [True, 83.31197740112995]}}	[u'AF-P14176-F1-model_v2_&_NOBFS_0']	354	1	1	1
AF-P14294-F1-model_v2_&_NOBFS_0	ALPHAFOLD	{u'b1763': 1}	93.7034	{u'b1763': {u'A': [True, 93.7033996937213]}}	[u'AF-P14294-F1-model_v2_&_NOBFS_0']	653	1	1	1
AF-P14375-F1-model_v2_&_NOBFS_0	ALPHAFOLD	{u'b4004': 1}	84.7575	{u'b4004': {u'A': [True, 84.7575283446712]}}	[u'AF-P14375-F1-model_v2_&_NOBFS_0']	441	1	1	1
AF-P14377-F1-model_v2_&_NOBFS_0	ALPHAFOLD	{u'b4003': 1}	82.4037	{u'b4003': {u'A': [True, 82.40367741935485]}}	[u'AF-P14377-F1-model_v2_&_NOBFS_0']	465	1	1	1
AF-P14407-F1-model_v2_&_NOBFS_0	ALPHAFOLD	{u'b4122': 1}	96.4957	{u'b4122': {u'A': [True, 96.4957481751825]}}	[u'AF-P14407-F1-model_v2_&_NOBFS_0']	548	1	1	1
AF-P14900-F1-model_v2_&_NOBFS_0	ALPHAFOLD	{u'b0088': 1}	95.9961	{u'b0088': {u'A': [True, 95.99609589041096]}}	[u'AF-P14900-F1-model_v2_&_NOBFS_0']	438	1	1	1
AF-P15005-F1-model_v2_&_NOBFS_0	ALPHAFOLD	{u'b4346': 1}	88.5954	{u'b4346': {u'A': [True, 88.59535947712418]}}	[u'AF-P15005-F1-model_v2_&_NOBFS_0']	459	1	1	1
AF-P15006-F1-model_v2_&_NOBFS_0	ALPHAFOLD	{u'b4345': 1}	88.4768	{u'b4345': {u'A': [True, 88.4767816091954]}}	[u'AF-P15006-F1-model_v2_&_NOBFS_0']	348	1	1	1
AF-P15028-F1-model_v2_&_NOBFS_0	ALPHAFOLD	{u'b4290': 1}	93.9609	{u'b4290': {u'A': [True, 93.96086666666667]}}	[u'AF-P15028-F1-model_v2_&_NOBFS_0']	300	1	1	1
AF-P15029-F1-model_v2_&_NOBFS_0	ALPHAFOLD	{u'b4288': 1}	94.1268	{u'b4288': {u'A': [True, 94.12682389937106]}}	[u'AF-P15029-F1-model_v2_&_NOBFS_0']	318	1	1	1
AF-P15030-F1-model_v2_&_NOBFS_0	ALPHAFOLD	{u'b4289': 1}	90.2553	{u'b4289': {u'A': [True, 90.25527108433735]}}	[u'AF-P15030-F1-model_v2_&_NOBFS_0']	332	1	1	1
AF-P15031-F1-model_v2_&_NOBFS_0	ALPHAFOLD	{u'b4287': 1}	95.1007	{u'b4287': {u'A': [True, 95.10074509803921]}}	[u'AF-P15031-F1-model_v2_&_NOBFS_0']	255	1	1	1
AF-P15032-F1-model_v2_&_NOBFS_0	ALPHAFOLD	{u'b1350': 1}	77.1778	{u'b1350': {u'A': [True, 77.17779445727483]}}	[u'AF-P15032-F1-model_v2_&_NOBFS_0']	866	1	1	1
AF-P15033-F1-model_v2_&_NOBFS_0	ALPHAFOLD	{u'b1351': 1}	89.8602	{u'b1351': {u'A': [True, 89.86021978021978]}}	[u'AF-P15033-F1-model_v2_&_NOBFS_0']	91	1	1	1
AF-P15034-F1-model_v2_&_NOBFS_0	ALPHAFOLD	{u'b2908': 1}	98.5697	{u'b2908': {u'A': [True, 98.56972789115646]}}	[u'AF-P15034-F1-model_v2_&_NOBFS_0']	441	1	1	1
AF-P15038-F1-model_v2_&_NOBFS_0	ALPHAFOLD	{u'b0962': 1}	93.7201	{u'b0962': {u'A': [True, 93.7201461988304]}}	[u'AF-P15038-F1-model_v2_&_NOBFS_0']	684	1	1	1
AF-P15042-F1-model_v2_&_NOBFS_0	ALPHAFOLD	{u'b2411': 1}	88.9935	{u'b2411': {u'A': [True, 88.99347242921014]}}	[u'AF-P15042-F1-model_v2_&_NOBFS_0']	671	1	1	1
AF-P15043-F1-model_v2_&_NOBFS_0	ALPHAFOLD	{u'b3822': 1}	87.6935	{u'b3822': {u'A': [True, 87.69349753694581]}}	[u'AF-P15043-F1-model_v2_&_NOBFS_0']	609	1	1	1
AF-P15047-F1-model_v2_&_NOBFS_0	ALPHAFOLD	{u'b0596': 1}	97.1646	{u'b0596': {u'A': [True, 97.16459677419354]}}	[u'AF-P15047-F1-model_v2_&_NOBFS_0']	248	1	1	1
AF-P15067-F1-model_v2_&_NOBFS_0	ALPHAFOLD	{u'b3431': 1}	96.5371	{u'b3431': {u'A': [True, 96.53710806697107]}}	[u'AF-P15067-F1-model_v2_&_NOBFS_0']	657	1	1	1
AF-P15070-F1-model_v2_&_NOBFS_0	ALPHAFOLD	{u'b1946': 1}	81.2815	{u'b1946': {u'A': [True, 81.28153284671532]}}	[u'AF-P15070-F1-model_v2_&_NOBFS_0']	137	1	1	1
AF-P15078-F1-model_v2_&_NOBFS_0	ALPHAFOLD	{u'b0598': 1}	91.3215	{u'b0598': {u'A': [True, 91.32149786019973]}}	[u'AF-P15078-F1-model_v2_&_NOBFS_0']	701	1	1	1
AF-P15081-F1-model_v2_&_NOBFS_0	ALPHAFOLD	{u'b2706': 1}	83.0617	{u'b2706': {u'A': [True, 83.06168067226889]}}	[u'AF-P15081-F1-model_v2_&_NOBFS_0']	119	1	1	1
AF-P15082-F1-model_v2_&_NOBFS_0	ALPHAFOLD	{u'b2707': 1}	93.3117	{u'b2707': {u'A': [True, 93.31167315175097]}}	[u'AF-P15082-F1-model_v2_&_NOBFS_0']	257	1	1	1
AF-P15254-F1-model_v2_&_NOBFS_0	ALPHAFOLD	{u'b2557': 1}	96.9339	{u'b2557': {u'A': [True, 96.93386872586872]}}	[u'AF-P15254-F1-model_v2_&_NOBFS_0']	1295	1	1	1
AF-P15286-F1-model_v2_&_NOBFS_0	ALPHAFOLD	{u'b2321': 1}	72.5059	{u'b2321': {u'A': [True, 72.5058912386707]}}	[u'AF-P15286-F1-model_v2_&_NOBFS_0']	331	1	1	1
AF-P15288-F1-model_v2_&_NOBFS_0	ALPHAFOLD	{u'b0237': 1}	95.6452	{u'b0237': {u'A': [True, 95.64523711340205]}}	[u'AF-P15288-F1-model_v2_&_NOBFS_0']	485	1	1	1
AF-P15373-F1-model_v2_&_NOBFS_0	ALPHAFOLD	{u'b3129': 1}	86.4872	{u'b3129': {u'A': [True, 86.48720720720719]}}	[u'AF-P15373-F1-model_v2_&_NOBFS_0']	111	1	1	1
AF-P15639-F1-model_v2_&_NOBFS_0	ALPHAFOLD	{u'b4006': 1}	96.136	{u'b4006': {u'A': [True, 96.13597353497164]}}	[u'AF-P15639-F1-model_v2_&_NOBFS_0']	529	1	1	1
AF-P15640-F1-model_v2_&_NOBFS_0	ALPHAFOLD	{u'b4005': 1}	95.4375	{u'b4005': {u'A': [True, 95.4374592074592]}}	[u'AF-P15640-F1-model_v2_&_NOBFS_0']	429	1	1	1
AF-P15723-F1-model_v2_&_NOBFS_0	ALPHAFOLD	{u'b0160': 1}	95.2239	{u'b0160': {u'A': [True, 95.223900990099]}}	[u'AF-P15723-F1-model_v2_&_NOBFS_0']	505	1	1	1
AF-P15770-F1-model_v2_&_NOBFS_0	ALPHAFOLD	{u'b3281': 1}	96.2783	{u'b3281': {u'A': [True, 96.27830882352941]}}	[u'AF-P15770-F1-model_v2_&_NOBFS_0']	272	1	1	1
AF-P15877-F1-model_v2_&_NOBFS_0	ALPHAFOLD	{u'b0124': 1}	94.1874	{u'b0124': {u'A': [True, 94.18744974874373]}}	[u'AF-P15877-F1-model_v2_&_NOBFS_0']	796	1	1	1
AF-P15977-F1-model_v2_&_NOBFS_0	ALPHAFOLD	{u'b3416': 1}	96.6692	{u'b3416': {u'A': [True, 96.6692219020173]}}	[u'AF-P15977-F1-model_v2_&_NOBFS_0']	694	1	1	1
AF-P15993-F1-model_v2_&_NOBFS_0	ALPHAFOLD	{u'b0112': 1}	86.5807	{u'b0112': {u'A': [True, 86.58072210065646]}}	[u'AF-P15993-F1-model_v2_&_NOBFS_0']	457	1	1	1
AF-P16095-F1-model_v2_&_NOBFS_0	ALPHAFOLD	{u'b1814': 1}	95.5611	{u'b1814': {u'A': [True, 95.5611013215859]}}	[u'AF-P16095-F1-model_v2_&_NOBFS_0']	454	1	1	1
AF-P16256-F1-model_v2_&_NOBFS_0	ALPHAFOLD	{u'b3258': 1}	88.8789	{u'b3258': {u'A': [True, 88.87888198757764]}}	[u'AF-P16256-F1-model_v2_&_NOBFS_0']	483	1	1	1
AF-P16384-F1-model_v2_&_NOBFS_0	ALPHAFOLD	{u'b4171': 1}	94.3062	{u'b4171': {u'A': [True, 94.30620253164557]}}	[u'AF-P16384-F1-model_v2_&_NOBFS_0']	316	1	1	1
AF-P16429-F1-model_v2_&_NOBFS_0	ALPHAFOLD	{u'b2723': 1}	90.3521	{u'b2723': {u'A': [True, 90.35213815789474]}}	[u'AF-P16429-F1-model_v2_&_NOBFS_0']	608	1	1	1
AF-P16430-F1-model_v2_&_NOBFS_0	ALPHAFOLD	{u'b2722': 1}	91.7587	{u'b2722': {u'A': [True, 91.758664495114]}}	[u'AF-P16430-F1-model_v2_&_NOBFS_0']	307	1	1	1
AF-P16431-F1-model_v2_&_NOBFS_0	ALPHAFOLD	{u'b2721': 1}	92.0656	{u'b2721': {u'A': [True, 92.06564147627418]}}	[u'AF-P16431-F1-model_v2_&_NOBFS_0']	569	1	1	1
AF-P16432-F1-model_v2_&_NOBFS_0	ALPHAFOLD	{u'b2720': 1}	92.1663	{u'b2720': {u'A': [True, 92.16627777777778]}}	[u'AF-P16432-F1-model_v2_&_NOBFS_0']	180	1	1	1
AF-P16433-F1-model_v2_&_NOBFS_0	ALPHAFOLD	{u'b2719': 1}	87.8077	{u'b2719': {u'A': [True, 87.80768627450982]}}	[u'AF-P16433-F1-model_v2_&_NOBFS_0']	255	1	1	1
AF-P16456-F1-model_v2_&_NOBFS_0	ALPHAFOLD	{u'b1764': 1}	94.2948	{u'b1764': {u'A': [True, 94.29478386167146]}}	[u'AF-P16456-F1-model_v2_&_NOBFS_0']	347	1	1	1
AF-P16525-F1-model_v2_&_NOBFS_0	ALPHAFOLD	{u'b1610': 1}	95.2798	{u'b1610': {u'A': [True, 95.27983818770227]}}	[u'AF-P16525-F1-model_v2_&_NOBFS_0']	309	1	1	1
AF-P16528-F1-model_v2_&_NOBFS_0	ALPHAFOLD	{u'b4018': 1}	88.1984	{u'b4018': {u'A': [True, 88.19835766423357]}}	[u'AF-P16528-F1-model_v2_&_NOBFS_0']	274	1	1	1
AF-P16659-F1-model_v2_&_NOBFS_0	ALPHAFOLD	{u'b0194': 1}	95.3787	{u'b0194': {u'A': [True, 95.37867132867135]}}	[u'AF-P16659-F1-model_v2_&_NOBFS_0']	572	1	1	1
AF-P16676-F1-model_v2_&_NOBFS_0	ALPHAFOLD	{u'b2422': 1}	91.4681	{u'b2422': {u'A': [True, 91.46810958904109]}}	[u'AF-P16676-F1-model_v2_&_NOBFS_0']	365	1	1	1
AF-P16677-F1-model_v2_&_NOBFS_0	ALPHAFOLD	{u'b4106': 1}	89.4649	{u'b4106': {u'A': [True, 89.4648854961832]}}	[u'AF-P16677-F1-model_v2_&_NOBFS_0']	262	1	1	1
AF-P16678-F1-model_v2_&_NOBFS_0	ALPHAFOLD	{u'b4097': 1}	95.0153	{u'b4097': {u'A': [True, 95.01527777777778]}}	[u'AF-P16678-F1-model_v2_&_NOBFS_0']	252	1	1	1
AF-P16679-F1-model_v2_&_NOBFS_0	ALPHAFOLD	{u'b4096': 1}	94.9383	{u'b4096': {u'A': [True, 94.9382743362832]}}	[u'AF-P16679-F1-model_v2_&_NOBFS_0']	226	1	1	1
AF-P16681-F1-model_v2_&_NOBFS_0	ALPHAFOLD	{u'b4107': 1}	90.7854	{u'b4107': {u'A': [True, 90.78537414965987]}}	[u'AF-P16681-F1-model_v2_&_NOBFS_0']	147	1	1	1
AF-P16682-F1-model_v2_&_NOBFS_0	ALPHAFOLD	{u'b4105': 1}	93.4323	{u'b4105': {u'A': [True, 93.43227810650887]}}	[u'AF-P16682-F1-model_v2_&_NOBFS_0']	338	1	1	1
AF-P16684-F1-model_v2_&_NOBFS_0	ALPHAFOLD	{u'b4102': 1}	85.8344	{u'b4102': {u'A': [True, 85.83439834024895]}}	[u'AF-P16684-F1-model_v2_&_NOBFS_0']	241	1	1	1
AF-P16685-F1-model_v2_&_NOBFS_0	ALPHAFOLD	{u'b4101': 1}	94.4958	{u'b4101': {u'A': [True, 94.49579999999999]}}	[u'AF-P16685-F1-model_v2_&_NOBFS_0']	150	1	1	1
AF-P16686-F1-model_v2_&_NOBFS_0	ALPHAFOLD	{u'b4100': 1}	96.7221	{u'b4100': {u'A': [True, 96.7220618556701]}}	[u'AF-P16686-F1-model_v2_&_NOBFS_0']	194	1	1	1
AF-P16687-F1-model_v2_&_NOBFS_0	ALPHAFOLD	{u'b4099': 1}	97.4812	{u'b4099': {u'A': [True, 97.48118644067796]}}	[u'AF-P16687-F1-model_v2_&_NOBFS_0']	354	1	1	1
AF-P16688-F1-model_v2_&_NOBFS_0	ALPHAFOLD	{u'b4098': 1}	93.6457	{u'b4098': {u'A': [True, 93.64569395017793]}}	[u'AF-P16688-F1-model_v2_&_NOBFS_0']	281	1	1	1
AF-P16689-F1-model_v2_&_NOBFS_0	ALPHAFOLD	{u'b4095': 1}	94.826	{u'b4095': {u'A': [True, 94.82595238095236]}}	[u'AF-P16689-F1-model_v2_&_NOBFS_0']	378	1	1	1
AF-P16690-F1-model_v2_&_NOBFS_0	ALPHAFOLD	{u'b4094': 1}	91.1202	{u'b4094': {u'A': [True, 91.1202162162162]}}	[u'AF-P16690-F1-model_v2_&_NOBFS_0']	185	1	1	1
AF-P16691-F1-model_v2_&_NOBFS_0	ALPHAFOLD	{u'b4093': 1}	96.8719	{u'b4093': {u'A': [True, 96.871875]}}	[u'AF-P16691-F1-model_v2_&_NOBFS_0']	144	1	1	1
AF-P16692-F1-model_v2_&_NOBFS_0	ALPHAFOLD	{u'b4092': 1}	96.9573	{u'b4092': {u'A': [True, 96.9572619047619]}}	[u'AF-P16692-F1-model_v2_&_NOBFS_0']	252	1	1	1
AF-P16700-F1-model_v2_&_NOBFS_0	ALPHAFOLD	{u'b2425': 1}	92.577	{u'b2425': {u'A': [True, 92.57698224852071]}}	[u'AF-P16700-F1-model_v2_&_NOBFS_0']	338	1	1	1
AF-P16701-F1-model_v2_&_NOBFS_0	ALPHAFOLD	{u'b2424': 1}	89.4936	{u'b2424': {u'A': [True, 89.49364620938628]}}	[u'AF-P16701-F1-model_v2_&_NOBFS_0']	277	1	1	1
AF-P16703-F1-model_v2_&_NOBFS_0	ALPHAFOLD	{u'b2421': 1}	94.8568	{u'b2421': {u'A': [True, 94.85683168316831]}}	[u'AF-P16703-F1-model_v2_&_NOBFS_0']	303	1	1	1
AF-P16869-F1-model_v2_&_NOBFS_0	ALPHAFOLD	{u'b1102': 1}	93.445	{u'b1102': {u'A': [True, 93.44503429355282]}}	[u'AF-P16869-F1-model_v2_&_NOBFS_0']	729	1	1	1
AF-P16916-F1-model_v2_&_NOBFS_0	ALPHAFOLD	{u'b3593': 1}	81.6386	{u'b3593': {u'A': [True, 81.6385984023239]}}	[u'AF-P16916-F1-model_v2_&_NOBFS_0']	1377	1	1	1
AF-P16917-F1-model_v2_&_NOBFS_0	ALPHAFOLD	{u'b3482': 1}	83.2618	{u'b3482': {u'A': [True, 83.26179305457123]}}	[u'AF-P16917-F1-model_v2_&_NOBFS_0']	1411	1	1	1
AF-P16918-F1-model_v2_&_NOBFS_0	ALPHAFOLD	{u'b0700': 1}	80.4501	{u'b0700': {u'A': [True, 80.45007874015748]}}	[u'AF-P16918-F1-model_v2_&_NOBFS_0']	1397	1	1	1
AF-P16919-F1-model_v2_&_NOBFS_0	ALPHAFOLD	{u'b0497': 1}	82.2718	{u'b0497': {u'A': [True, 82.2718443197756]}}	[u'AF-P16919-F1-model_v2_&_NOBFS_0']	1426	1	1	1
AF-P16926-F1-model_v2_&_NOBFS_0	ALPHAFOLD	{u'b3250': 1}	78.45	{u'b3250': {u'A': [True, 78.45]}}	[u'AF-P16926-F1-model_v2_&_NOBFS_0']	367	1	1	1
AF-P17109-F1-model_v2_&_NOBFS_0	ALPHAFOLD	{u'b2264': 1}	96.5796	{u'b2264': {u'A': [True, 96.57955035971223]}}	[u'AF-P17109-F1-model_v2_&_NOBFS_0']	556	1	1	1
AF-P17115-F1-model_v2_&_NOBFS_0	ALPHAFOLD	{u'b2708': 1}	94.2221	{u'b2708': {u'A': [True, 94.2221183800623]}}	[u'AF-P17115-F1-model_v2_&_NOBFS_0']	321	1	1	1
AF-P17117-F1-model_v2_&_NOBFS_0	ALPHAFOLD	{u'b0851': 1}	97.1718	{u'b0851': {u'A': [True, 97.17179166666666]}}	[u'AF-P17117-F1-model_v2_&_NOBFS_0']	240	1	1	1
AF-P17169-F1-model_v2_&_NOBFS_0	ALPHAFOLD	{u'b3729': 1}	95.1383	{u'b3729': {u'A': [True, 95.13832512315271]}}	[u'AF-P17169-F1-model_v2_&_NOBFS_0']	609	1	1	1
AF-P17315-F1-model_v2_&_NOBFS_0	ALPHAFOLD	{u'b2155': 1}	90.6414	{u'b2155': {u'A': [True, 90.64138763197587]}}	[u'AF-P17315-F1-model_v2_&_NOBFS_0']	663	1	1	1
AF-P17334-F1-model_v2_&_NOBFS_0	ALPHAFOLD	{u'b1737': 1}	94.0747	{u'b1737': {u'A': [True, 94.07469026548674]}}	[u'AF-P17334-F1-model_v2_&_NOBFS_0']	452	1	1	1
AF-P17410-F1-model_v2_&_NOBFS_0	ALPHAFOLD	{u'b1735': 1}	85.8761	{u'b1735': {u'A': [True, 85.87610714285715]}}	[u'AF-P17410-F1-model_v2_&_NOBFS_0']	280	1	1	1
AF-P17411-F1-model_v2_&_NOBFS_0	ALPHAFOLD	{u'b1734': 1}	94.9217	{u'b1734': {u'A': [True, 94.92166666666667]}}	[u'AF-P17411-F1-model_v2_&_NOBFS_0']	450	1	1	1
AF-P17443-F1-model_v2_&_NOBFS_0	ALPHAFOLD	{u'b0090': 1}	94.3924	{u'b0090': {u'A': [True, 94.3923943661972]}}	[u'AF-P17443-F1-model_v2_&_NOBFS_0']	355	1	1	1
AF-P17444-F1-model_v2_&_NOBFS_0	ALPHAFOLD	{u'b0311': 1}	96.2713	{u'b0311': {u'A': [True, 96.2713129496403]}}	[u'AF-P17444-F1-model_v2_&_NOBFS_0']	556	1	1	1
AF-P17445-F1-model_v2_&_NOBFS_0	ALPHAFOLD	{u'b0312': 1}	98.1558	{u'b0312': {u'A': [True, 98.15581632653063]}}	[u'AF-P17445-F1-model_v2_&_NOBFS_0']	490	1	1	1
AF-P17446-F1-model_v2_&_NOBFS_0	ALPHAFOLD	{u'b0313': 1}	93.918	{u'b0313': {u'A': [True, 93.91799999999999]}}	[u'AF-P17446-F1-model_v2_&_NOBFS_0']	195	1	1	1
AF-P17583-F1-model_v2_&_NOBFS_0	ALPHAFOLD	{u'b0341': 1}	89.1241	{u'b0341': {u'A': [True, 89.124140625]}}	[u'AF-P17583-F1-model_v2_&_NOBFS_0']	384	1	1	1
AF-P17802-F1-model_v2_&_NOBFS_0	ALPHAFOLD	{u'b2961': 1}	94.3548	{u'b2961': {u'A': [True, 94.35477142857142]}}	[u'AF-P17802-F1-model_v2_&_NOBFS_0']	350	1	1	1
AF-P17846-F1-model_v2_&_NOBFS_0	ALPHAFOLD	{u'b2763': 1}	96.7995	{u'b2763': {u'A': [True, 96.79954385964912]}}	[u'AF-P17846-F1-model_v2_&_NOBFS_0']	570	1	1	1
AF-P17854-F1-model_v2_&_NOBFS_0	ALPHAFOLD	{u'b2762': 1}	93.1932	{u'b2762': {u'A': [True, 93.19319672131147]}}	[u'AF-P17854-F1-model_v2_&_NOBFS_0']	244	1	1	1
AF-P17888-F1-model_v2_&_NOBFS_0	ALPHAFOLD	{u'b3935': 1}	89.643	{u'b3935': {u'A': [True, 89.64303278688524]}}	[u'AF-P17888-F1-model_v2_&_NOBFS_0']	732	1	1	1
AF-P17952-F1-model_v2_&_NOBFS_0	ALPHAFOLD	{u'b0091': 1}	93.7329	{u'b0091': {u'A': [True, 93.73293279022404]}}	[u'AF-P17952-F1-model_v2_&_NOBFS_0']	491	1	1	1
AF-P17993-F1-model_v2_&_NOBFS_0	ALPHAFOLD	{u'b2232': 1}	90.3547	{u'b2232': {u'A': [True, 90.35470833333332]}}	[u'AF-P17993-F1-model_v2_&_NOBFS_0']	240	1	1	1
AF-P17994-F1-model_v2_&_NOBFS_0	ALPHAFOLD	{u'b2230': 1}	87.2944	{u'b2230': {u'A': [True, 87.29441281138789]}}	[u'AF-P17994-F1-model_v2_&_NOBFS_0']	562	1	1	1
AF-P18133-F1-model_v2_&_NOBFS_0	ALPHAFOLD	{u'b0931': 1}	95.6577	{u'b0931': {u'A': [True, 95.65767500000001]}}	[u'AF-P18133-F1-model_v2_&_NOBFS_0']	400	1	1	1
AF-P18196-F1-model_v2_&_NOBFS_0	ALPHAFOLD	{u'b1176': 1}	88.9838	{u'b1176': {u'A': [True, 88.98376623376623]}}	[u'AF-P18196-F1-model_v2_&_NOBFS_0']	231	1	1	1
AF-P18200-F1-model_v2_&_NOBFS_0	ALPHAFOLD	{u'b0418': 1}	89.4248	{u'b0418': {u'A': [True, 89.42476744186047]}}	[u'AF-P18200-F1-model_v2_&_NOBFS_0']	172	1	1	1
AF-P18335-F1-model_v2_&_NOBFS_0	ALPHAFOLD	{u'b3359': 1}	97.8782	{u'b3359': {u'A': [True, 97.87822660098522]}}	[u'AF-P18335-F1-model_v2_&_NOBFS_0']	406	1	1	1
AF-P18390-F1-model_v2_&_NOBFS_0	ALPHAFOLD	{u'b4360': 1}	75.9319	{u'b4360': {u'A': [True, 75.93189024390244]}}	[u'AF-P18390-F1-model_v2_&_NOBFS_0']	164	1	1	1
AF-P18392-F1-model_v2_&_NOBFS_0	ALPHAFOLD	{u'b1609': 1}	80.906	{u'b1609': {u'A': [True, 80.90600461893766]}}	[u'AF-P18392-F1-model_v2_&_NOBFS_0']	433	1	1	1
AF-P18393-F1-model_v2_&_NOBFS_0	ALPHAFOLD	{u'b4511': 1}	86.0179	{u'b4511': {u'A': [True, 86.01791666666666]}}	[u'AF-P18393-F1-model_v2_&_NOBFS_0']	72	1	1	1
AF-P18775-F1-model_v2_&_NOBFS_0	ALPHAFOLD	{u'b0894': 1}	93.402	{u'b0894': {u'A': [True, 93.40199017199018]}}	[u'AF-P18775-F1-model_v2_&_NOBFS_0']	814	1	1	1
AF-P18776-F1-model_v2_&_NOBFS_0	ALPHAFOLD	{u'b0895': 1}	97.0332	{u'b0895': {u'A': [True, 97.03317073170732]}}	[u'AF-P18776-F1-model_v2_&_NOBFS_0']	205	1	1	1
AF-P18777-F1-model_v2_&_NOBFS_0	ALPHAFOLD	{u'b0896': 1}	92.7665	{u'b0896': {u'A': [True, 92.7665156794425]}}	[u'AF-P18777-F1-model_v2_&_NOBFS_0']	287	1	1	1
AF-P18811-F1-model_v2_&_NOBFS_0	ALPHAFOLD	{u'b1620': 1}	87.4543	{u'b1620': {u'A': [True, 87.45432748538012]}}	[u'AF-P18811-F1-model_v2_&_NOBFS_0']	342	1	1	1
AF-P18843-F1-model_v2_&_NOBFS_0	ALPHAFOLD	{u'b1740': 1}	96.061	{u'b1740': {u'A': [True, 96.06098181818182]}}	[u'AF-P18843-F1-model_v2_&_NOBFS_0']	275	1	1	1
AF-P18956-F1-model_v2_&_NOBFS_0	ALPHAFOLD	{u'b3447': 1}	91.6184	{u'b3447': {u'A': [True, 91.61844827586206]}}	[u'AF-P18956-F1-model_v2_&_NOBFS_0']	580	1	1	1
AF-P19317-F1-model_v2_&_NOBFS_0	ALPHAFOLD	{u'b1466': 1}	84.9795	{u'b1466': {u'A': [True, 84.97948051948052]}}	[u'AF-P19317-F1-model_v2_&_NOBFS_0']	231	1	1	1
AF-P19318-F1-model_v2_&_NOBFS_0	ALPHAFOLD	{u'b1467': 1}	93.1767	{u'b1467': {u'A': [True, 93.17665369649806]}}	[u'AF-P19318-F1-model_v2_&_NOBFS_0']	514	1	1	1
AF-P19319-F1-model_v2_&_NOBFS_0	ALPHAFOLD	{u'b1468': 1}	97.5474	{u'b1468': {u'A': [True, 97.54737560192616]}}	[u'AF-P19319-F1-model_v2_&_NOBFS_0']	1246	1	1	1
AF-P19323-F1-model_v2_&_NOBFS_0	ALPHAFOLD	{u'b2731': 1}	83.4872	{u'b2731': {u'A': [True, 83.48715317919076]}}	[u'AF-P19323-F1-model_v2_&_NOBFS_0']	692	1	1	1
AF-P19624-F1-model_v2_&_NOBFS_0	ALPHAFOLD	{u'b0052': 1}	96.9872	{u'b0052': {u'A': [True, 96.98717325227963]}}	[u'AF-P19624-F1-model_v2_&_NOBFS_0']	329	1	1	1
AF-P19636-F1-model_v2_&_NOBFS_0	ALPHAFOLD	{u'b2440': 1}	91.6579	{u'b2440': {u'A': [True, 91.65793220338985]}}	[u'AF-P19636-F1-model_v2_&_NOBFS_0']	295	1	1	1
AF-P19642-F1-model_v2_&_NOBFS_0	ALPHAFOLD	{u'b1621': 1}	87.1697	{u'b1621': {u'A': [True, 87.16969811320755]}}	[u'AF-P19642-F1-model_v2_&_NOBFS_0']	530	1	1	1
AF-P19767-F1-model_v2_&_NOBFS_0	ALPHAFOLD	{u'b4294': 1}	88.6547	{u'b4294': {u'A': [True, 88.65472527472528]}}	[u'AF-P19767-F1-model_v2_&_NOBFS_0']	91	1	1	1
AF-P19768-F1-model_v2_&_NOBFS_0	ALPHAFOLD	{u'b3557': 1}	84.3034	{u'b3557': {u'A': [True, 84.30341040462427]}}	[u'AF-P19768-F1-model_v2_&_NOBFS_0']	173	1	1	1
AF-P19769-F1-model_v2_&_NOBFS_0	ALPHAFOLD	{u'b3558': 1}	88.5467	{u'b3558': {u'A': [True, 88.54671378091872]}}	[u'AF-P19769-F1-model_v2_&_NOBFS_0']	283	1	1	1
AF-P19925-F1-model_v2_&_NOBFS_0	ALPHAFOLD	{u'b0583': 1}	95.1229	{u'b0583': {u'A': [True, 95.12291262135922]}}	[u'AF-P19925-F1-model_v2_&_NOBFS_0']	206	1	1	1
AF-P19926-F1-model_v2_&_NOBFS_0	ALPHAFOLD	{u'b1002': 1}	94.3231	{u'b1002': {u'A': [True, 94.32309927360775]}}	[u'AF-P19926-F1-model_v2_&_NOBFS_0']	413	1	1	1
AF-P19930-F1-model_v2_&_NOBFS_0	ALPHAFOLD	{u'b0975': 1}	85.3296	{u'b0975': {u'A': [True, 85.32958974358972]}}	[u'AF-P19930-F1-model_v2_&_NOBFS_0']	195	1	1	1
AF-P19931-F1-model_v2_&_NOBFS_0	ALPHAFOLD	{u'b0976': 1}	91.6181	{u'b0976': {u'A': [True, 91.61810606060607]}}	[u'AF-P19931-F1-model_v2_&_NOBFS_0']	132	1	1	1
AF-P19932-F1-model_v2_&_NOBFS_0	ALPHAFOLD	{u'b0977': 1}	87.0374	{u'b0977': {u'A': [True, 87.03740350877193]}}	[u'AF-P19932-F1-model_v2_&_NOBFS_0']	285	1	1	1
AF-P19934-F1-model_v2_&_NOBFS_0	ALPHAFOLD	{u'b0739': 1}	76.012	{u'b0739': {u'A': [True, 76.01197149643706]}}	[u'AF-P19934-F1-model_v2_&_NOBFS_0']	421	1	1	1
AF-P20083-F1-model_v2_&_NOBFS_0	ALPHAFOLD	{u'b3030': 1}	87.9619	{u'b3030': {u'A': [True, 87.96193650793651]}}	[u'AF-P20083-F1-model_v2_&_NOBFS_0']	630	1	1	1
AF-P20099-F1-model_v2_&_NOBFS_0	ALPHAFOLD	{u'b3551': 1}	96.9444	{u'b3551': {u'A': [True, 96.94444015444016]}}	[u'AF-P20099-F1-model_v2_&_NOBFS_0']	777	1	1	1
AF-P20605-F1-model_v2_&_NOBFS_0	ALPHAFOLD	{u'b3361': 1}	94.055	{u'b3361': {u'A': [True, 94.05505000000001]}}	[u'AF-P20605-F1-model_v2_&_NOBFS_0']	200	1	1	1
AF-P20966-F1-model_v2_&_NOBFS_0	ALPHAFOLD	{u'b2167': 1}	85.9063	{u'b2167': {u'A': [True, 85.90625222024867]}}	[u'AF-P20966-F1-model_v2_&_NOBFS_0']	563	1	1	1
AF-P21151-F1-model_v2_&_NOBFS_0	ALPHAFOLD	{u'b3845': 1}	97.8105	{u'b3845': {u'A': [True, 97.81046511627906]}}	[u'AF-P21151-F1-model_v2_&_NOBFS_0']	387	1	1	1
AF-P21156-F1-model_v2_&_NOBFS_0	ALPHAFOLD	{u'b2752': 1}	91.9531	{u'b2752': {u'A': [True, 91.95314569536423]}}	[u'AF-P21156-F1-model_v2_&_NOBFS_0']	302	1	1	1
AF-P21165-F1-model_v2_&_NOBFS_0	ALPHAFOLD	{u'b3847': 1}	97.2245	{u'b3847': {u'A': [True, 97.22446952595935]}}	[u'AF-P21165-F1-model_v2_&_NOBFS_0']	443	1	1	1
AF-P21169-F1-model_v2_&_NOBFS_0	ALPHAFOLD	{u'b2965': 1}	95.9839	{u'b2965': {u'A': [True, 95.98386779184247]}}	[u'AF-P21169-F1-model_v2_&_NOBFS_0']	711	1	1	1
AF-P21170-F1-model_v2_&_NOBFS_0	ALPHAFOLD	{u'b2938': 1}	90.0567	{u'b2938': {u'A': [True, 90.05670212765958]}}	[u'AF-P21170-F1-model_v2_&_NOBFS_0']	658	1	1	1
AF-P21177-F1-model_v2_&_NOBFS_0	ALPHAFOLD	{u'b3846': 1}	95.6994	{u'b3846': {u'A': [True, 95.69939643347051]}}	[u'AF-P21177-F1-model_v2_&_NOBFS_0']	729	1	1	1
AF-P21179-F1-model_v2_&_NOBFS_0	ALPHAFOLD	{u'b1732': 1}	97.9227	{u'b1732': {u'A': [True, 97.92274900398407]}}	[u'AF-P21179-F1-model_v2_&_NOBFS_0']	753	1	1	1
AF-P21189-F1-model_v2_&_NOBFS_0	ALPHAFOLD	{u'b0060': 1}	95.221	{u'b0060': {u'A': [True, 95.22099616858239]}}	[u'AF-P21189-F1-model_v2_&_NOBFS_0']	783	1	1	1
AF-P21338-F1-model_v2_&_NOBFS_0	ALPHAFOLD	{u'b0611': 1}	94.4719	{u'b0611': {u'A': [True, 94.4718656716418]}}	[u'AF-P21338-F1-model_v2_&_NOBFS_0']	268	1	1	1
AF-P21345-F1-model_v2_&_NOBFS_0	ALPHAFOLD	{u'b4077': 1}	87.0591	{u'b4077': {u'A': [True, 87.05906178489703]}}	[u'AF-P21345-F1-model_v2_&_NOBFS_0']	437	1	1	1
AF-P21361-F1-model_v2_&_NOBFS_0	ALPHAFOLD	{u'b1259': 1}	62.5473	{u'b1259': {u'A': [True, 62.54728813559322]}}	[u'AF-P21361-F1-model_v2_&_NOBFS_0']	59	1	1	1
AF-P21362-F1-model_v2_&_NOBFS_0	ALPHAFOLD	{u'b1258': 1}	95.9955	{u'b1258': {u'A': [True, 95.99548192771084]}}	[u'AF-P21362-F1-model_v2_&_NOBFS_0']	166	1	1	1
AF-P21363-F1-model_v2_&_NOBFS_0	ALPHAFOLD	{u'b1257': 1}	91.0735	{u'b1257': {u'A': [True, 91.07345238095238]}}	[u'AF-P21363-F1-model_v2_&_NOBFS_0']	168	1	1	1
AF-P21365-F1-model_v2_&_NOBFS_0	ALPHAFOLD	{u'b1255': 1}	88.1066	{u'b1255': {u'A': [True, 88.1065991902834]}}	[u'AF-P21365-F1-model_v2_&_NOBFS_0']	247	1	1	1
AF-P21367-F1-model_v2_&_NOBFS_0	ALPHAFOLD	{u'b0897': 1}	97.5936	{u'b0897': {u'A': [True, 97.59360576923078]}}	[u'AF-P21367-F1-model_v2_&_NOBFS_0']	208	1	1	1
AF-P21369-F1-model_v2_&_NOBFS_0	ALPHAFOLD	{u'b1768': 1}	97.5371	{u'b1768': {u'A': [True, 97.53708920187792]}}	[u'AF-P21369-F1-model_v2_&_NOBFS_0']	213	1	1	1
AF-P21418-F1-model_v2_&_NOBFS_0	ALPHAFOLD	{u'b1573': 1}	92.8542	{u'b1573': {u'A': [True, 92.85416666666667]}}	[u'AF-P21418-F1-model_v2_&_NOBFS_0']	72	1	1	1
AF-P21420-F1-model_v2_&_NOBFS_0	ALPHAFOLD	{u'b0553': 1}	92.4413	{u'b0553': {u'A': [True, 92.44134246575342]}}	[u'AF-P21420-F1-model_v2_&_NOBFS_0']	365	1	1	1
AF-P21437-F1-model_v2_&_NOBFS_0	ALPHAFOLD	{u'b2930': 1}	96.6343	{u'b2930': {u'A': [True, 96.63429906542056]}}	[u'AF-P21437-F1-model_v2_&_NOBFS_0']	321	1	1	1
AF-P21499-F1-model_v2_&_NOBFS_0	ALPHAFOLD	{u'b4179': 1}	88.0736	{u'b4179': {u'A': [True, 88.07357933579337]}}	[u'AF-P21499-F1-model_v2_&_NOBFS_0']	813	1	1	1
AF-P21503-F1-model_v2_&_NOBFS_0	ALPHAFOLD	{u'b0898': 1}	87.1106	{u'b0898': {u'A': [True, 87.11057591623037]}}	[u'AF-P21503-F1-model_v2_&_NOBFS_0']	382	1	1	1
AF-P21507-F1-model_v2_&_NOBFS_0	ALPHAFOLD	{u'b2576': 1}	86.5273	{u'b2576': {u'A': [True, 86.52731981981984]}}	[u'AF-P21507-F1-model_v2_&_NOBFS_0']	444	1	1	1
AF-P21513-F1-model_v2_&_NOBFS_0	ALPHAFOLD	{u'b1084': 1}	65.7679	{u'b1084': {u'A': [True, 65.76793590951932]}}	[u'AF-P21513-F1-model_v2_&_NOBFS_0']	1061	1	1	1
AF-P21514-F1-model_v2_&_NOBFS_0	ALPHAFOLD	{u'b0315': 1}	88.7422	{u'b0315': {u'A': [True, 88.74220994475138]}}	[u'AF-P21514-F1-model_v2_&_NOBFS_0']	362	1	1	1
AF-P21515-F1-model_v2_&_NOBFS_0	ALPHAFOLD	{u'b0404': 1}	96.6058	{u'b0404': {u'A': [True, 96.60575129533677]}}	[u'AF-P21515-F1-model_v2_&_NOBFS_0']	193	1	1	1
AF-P21517-F1-model_v2_&_NOBFS_0	ALPHAFOLD	{u'b0403': 1}	95.6192	{u'b0403': {u'A': [True, 95.61918874172186]}}	[u'AF-P21517-F1-model_v2_&_NOBFS_0']	604	1	1	1
AF-P21599-F1-model_v2_&_NOBFS_0	ALPHAFOLD	{u'b1854': 1}	94.5621	{u'b1854': {u'A': [True, 94.56206250000001]}}	[u'AF-P21599-F1-model_v2_&_NOBFS_0']	480	1	1	1
AF-P21645-F1-model_v2_&_NOBFS_0	ALPHAFOLD	{u'b0179': 1}	97.0655	{u'b0179': {u'A': [True, 97.06545454545454]}}	[u'AF-P21645-F1-model_v2_&_NOBFS_0']	341	1	1	1
AF-P21693-F1-model_v2_&_NOBFS_0	ALPHAFOLD	{u'b1343': 1}	90.9167	{u'b1343': {u'A': [True, 90.91669584245078]}}	[u'AF-P21693-F1-model_v2_&_NOBFS_0']	457	1	1	1
AF-P21829-F1-model_v2_&_NOBFS_0	ALPHAFOLD	{u'b0766': 1}	95.6237	{u'b0766': {u'A': [True, 95.62371323529412]}}	[u'AF-P21829-F1-model_v2_&_NOBFS_0']	272	1	1	1
AF-P21865-F1-model_v2_&_NOBFS_0	ALPHAFOLD	{u'b0695': 1}	80.4078	{u'b0695': {u'A': [True, 80.40780760626397]}}	[u'AF-P21865-F1-model_v2_&_NOBFS_0']	894	1	1	1
AF-P21866-F1-model_v2_&_NOBFS_0	ALPHAFOLD	{u'b0694': 1}	92.4126	{u'b0694': {u'A': [True, 92.41257777777778]}}	[u'AF-P21866-F1-model_v2_&_NOBFS_0']	225	1	1	1
AF-P21888-F1-model_v2_&_NOBFS_0	ALPHAFOLD	{u'b0526': 1}	94.0783	{u'b0526': {u'A': [True, 94.07826464208243]}}	[u'AF-P21888-F1-model_v2_&_NOBFS_0']	461	1	1	1
AF-P21889-F1-model_v2_&_NOBFS_0	ALPHAFOLD	{u'b1866': 1}	94.8347	{u'b1866': {u'A': [True, 94.83471186440677]}}	[u'AF-P21889-F1-model_v2_&_NOBFS_0']	590	1	1	1
AF-P21893-F1-model_v2_&_NOBFS_0	ALPHAFOLD	{u'b2892': 1}	93.4378	{u'b2892': {u'A': [True, 93.43778162911613]}}	[u'AF-P21893-F1-model_v2_&_NOBFS_0']	577	1	1	1
AF-P22106-F1-model_v2_&_NOBFS_0	ALPHAFOLD	{u'b0674': 1}	94.6645	{u'b0674': {u'A': [True, 94.66445848375452]}}	[u'AF-P22106-F1-model_v2_&_NOBFS_0']	554	1	1	1
AF-P22186-F1-model_v2_&_NOBFS_0	ALPHAFOLD	{u'b0081': 1}	95.5478	{u'b0081': {u'A': [True, 95.54782894736843]}}	[u'AF-P22186-F1-model_v2_&_NOBFS_0']	152	1	1	1
AF-P22188-F1-model_v2_&_NOBFS_0	ALPHAFOLD	{u'b0085': 1}	96.1213	{u'b0085': {u'A': [True, 96.12131313131314]}}	[u'AF-P22188-F1-model_v2_&_NOBFS_0']	495	1	1	1
AF-P22255-F1-model_v2_&_NOBFS_0	ALPHAFOLD	{u'b4214': 1}	95.2478	{u'b4214': {u'A': [True, 95.24780487804878]}}	[u'AF-P22255-F1-model_v2_&_NOBFS_0']	246	1	1	1
AF-P22256-F1-model_v2_&_NOBFS_0	ALPHAFOLD	{u'b2662': 1}	97.4412	{u'b2662': {u'A': [True, 97.4412441314554]}}	[u'AF-P22256-F1-model_v2_&_NOBFS_0']	426	1	1	1
AF-P22259-F1-model_v2_&_NOBFS_0	ALPHAFOLD	{u'b3403': 1}	94.4031	{u'b3403': {u'A': [True, 94.4031111111111]}}	[u'AF-P22259-F1-model_v2_&_NOBFS_0']	540	1	1	1
AF-P22333-F1-model_v2_&_NOBFS_0	ALPHAFOLD	{u'b1623': 1}	98.1873	{u'b1623': {u'A': [True, 98.18726726726727]}}	[u'AF-P22333-F1-model_v2_&_NOBFS_0']	333	1	1	1
AF-P22523-F1-model_v2_&_NOBFS_0	ALPHAFOLD	{u'b0924': 1}	81.5566	{u'b0924': {u'A': [True, 81.55660834454913]}}	[u'AF-P22523-F1-model_v2_&_NOBFS_0']	1486	1	1	1
AF-P22524-F1-model_v2_&_NOBFS_0	ALPHAFOLD	{u'b0923': 1}	84.3734	{u'b0923': {u'A': [True, 84.37337606837605]}}	[u'AF-P22524-F1-model_v2_&_NOBFS_0']	234	1	1	1
AF-P22525-F1-model_v2_&_NOBFS_0	ALPHAFOLD	{u'b0925': 1}	84.9377	{u'b0925': {u'A': [True, 84.93772357723577]}}	[u'AF-P22525-F1-model_v2_&_NOBFS_0']	615	1	1	1
AF-P22564-F1-model_v2_&_NOBFS_0	ALPHAFOLD	{u'b0030': 1}	96.8879	{u'b0030': {u'A': [True, 96.88786184210527]}}	[u'AF-P22564-F1-model_v2_&_NOBFS_0']	304	1	1	1
AF-P22586-F1-model_v2_&_NOBFS_0	ALPHAFOLD	{u'b1947': 1}	76.3008	{u'b1947': {u'A': [True, 76.300826446281]}}	[u'AF-P22586-F1-model_v2_&_NOBFS_0']	121	1	1	1
AF-P22634-F1-model_v2_&_NOBFS_0	ALPHAFOLD	{u'b3967': 1}	93.341	{u'b3967': {u'A': [True, 93.34101754385965]}}	[u'AF-P22634-F1-model_v2_&_NOBFS_0']	285	1	1	1
AF-P22729-F1-model_v2_&_NOBFS_0	ALPHAFOLD	{u'b3456': 1}	82.6316	{u'b3456': {u'A': [True, 82.63162352941177]}}	[u'AF-P22729-F1-model_v2_&_NOBFS_0']	425	1	1	1
AF-P22731-F1-model_v2_&_NOBFS_0	ALPHAFOLD	{u'b3454': 1}	95.4525	{u'b3454': {u'A': [True, 95.45253164556962]}}	[u'AF-P22731-F1-model_v2_&_NOBFS_0']	237	1	1	1
AF-P22787-F1-model_v2_&_NOBFS_0	ALPHAFOLD	{u'b3765': 1}	88.5181	{u'b3765': {u'A': [True, 88.51808300395255]}}	[u'AF-P22787-F1-model_v2_&_NOBFS_0']	506	1	1	1
AF-P22939-F1-model_v2_&_NOBFS_0	ALPHAFOLD	{u'b0421': 1}	94.0786	{u'b0421': {u'A': [True, 94.0786287625418]}}	[u'AF-P22939-F1-model_v2_&_NOBFS_0']	299	1	1	1
AF-P23003-F1-model_v2_&_NOBFS_0	ALPHAFOLD	{u'b3965': 1}	96.0874	{u'b3965': {u'A': [True, 96.08737704918032]}}	[u'AF-P23003-F1-model_v2_&_NOBFS_0']	366	1	1	1
AF-P23173-F1-model_v2_&_NOBFS_0	ALPHAFOLD	{u'b3709': 1}	88.5727	{u'b3709': {u'A': [True, 88.57269879518071]}}	[u'AF-P23173-F1-model_v2_&_NOBFS_0']	415	1	1	1
AF-P23200-F1-model_v2_&_NOBFS_0	ALPHAFOLD	{u'b2148': 1}	91.4356	{u'b2148': {u'A': [True, 91.43556547619048]}}	[u'AF-P23200-F1-model_v2_&_NOBFS_0']	336	1	1	1
AF-P23256-F1-model_v2_&_NOBFS_0	ALPHAFOLD	{u'b1622': 1}	97.4053	{u'b1622': {u'A': [True, 97.40533333333332]}}	[u'AF-P23256-F1-model_v2_&_NOBFS_0']	390	1	1	1
AF-P23305-F1-model_v2_&_NOBFS_0	ALPHAFOLD	{u'b3810': 1}	87.719	{u'b3810': {u'A': [True, 87.71902127659575]}}	[u'AF-P23305-F1-model_v2_&_NOBFS_0']	235	1	1	1
AF-P23325-F1-model_v2_&_NOBFS_0	ALPHAFOLD	{u'b4017': 1}	82.3971	{u'b4017': {u'A': [True, 82.39707417582417]}}	[u'AF-P23325-F1-model_v2_&_NOBFS_0']	728	1	1	1
AF-P23331-F1-model_v2_&_NOBFS_0	ALPHAFOLD	{u'b1238': 1}	93.6081	{u'b1238': {u'A': [True, 93.60814634146341]}}	[u'AF-P23331-F1-model_v2_&_NOBFS_0']	205	1	1	1
AF-P23367-F1-model_v2_&_NOBFS_0	ALPHAFOLD	{u'b4170': 1}	81.9914	{u'b4170': {u'A': [True, 81.99138211382113]}}	[u'AF-P23367-F1-model_v2_&_NOBFS_0']	615	1	1	1
AF-P23481-F1-model_v2_&_NOBFS_0	ALPHAFOLD	{u'b2481': 1}	87.5931	{u'b2481': {u'A': [True, 87.5931219512195]}}	[u'AF-P23481-F1-model_v2_&_NOBFS_0']	205	1	1	1
AF-P23482-F1-model_v2_&_NOBFS_0	ALPHAFOLD	{u'b2482': 1}	90.662	{u'b2482': {u'A': [True, 90.66199404761905]}}	[u'AF-P23482-F1-model_v2_&_NOBFS_0']	672	1	1	1
AF-P23484-F1-model_v2_&_NOBFS_0	ALPHAFOLD	{u'b4293': 1}	90.5665	{u'b4293': {u'A': [True, 90.56653179190752]}}	[u'AF-P23484-F1-model_v2_&_NOBFS_0']	173	1	1	1
AF-P23485-F1-model_v2_&_NOBFS_0	ALPHAFOLD	{u'b4292': 1}	83.7428	{u'b4292': {u'A': [True, 83.74283911671922]}}	[u'AF-P23485-F1-model_v2_&_NOBFS_0']	317	1	1	1
AF-P23522-F1-model_v2_&_NOBFS_0	ALPHAFOLD	{u'b3126': 1}	96.7027	{u'b3126': {u'A': [True, 96.702734375]}}	[u'AF-P23522-F1-model_v2_&_NOBFS_0']	256	1	1	1
AF-P23524-F1-model_v2_&_NOBFS_0	ALPHAFOLD	{u'b3124': 1}	95.6376	{u'b3124': {u'A': [True, 95.6376377952756]}}	[u'AF-P23524-F1-model_v2_&_NOBFS_0']	381	1	1	1
AF-P23538-F1-model_v2_&_NOBFS_0	ALPHAFOLD	{u'b1702': 1}	88.6763	{u'b1702': {u'A': [True, 88.6763005050505]}}	[u'AF-P23538-F1-model_v2_&_NOBFS_0']	792	1	1	1
AF-P23721-F1-model_v2_&_NOBFS_0	ALPHAFOLD	{u'b0907': 1}	98.1407	{u'b0907': {u'A': [True, 98.14069060773481]}}	[u'AF-P23721-F1-model_v2_&_NOBFS_0']	362	1	1	1
AF-P23827-F1-model_v2_&_NOBFS_0	ALPHAFOLD	{u'b2209': 1}	89.968	{u'b2209': {u'A': [True, 89.96796296296296]}}	[u'AF-P23827-F1-model_v2_&_NOBFS_0']	162	1	1	1
AF-P23830-F1-model_v2_&_NOBFS_0	ALPHAFOLD	{u'b2585': 1}	95.2965	{u'b2585': {u'A': [True, 95.29645232815965]}}	[u'AF-P23830-F1-model_v2_&_NOBFS_0']	451	1	1	1
AF-P23836-F1-model_v2_&_NOBFS_0	ALPHAFOLD	{u'b1130': 1}	91.2692	{u'b1130': {u'A': [True, 91.26923766816144]}}	[u'AF-P23836-F1-model_v2_&_NOBFS_0']	223	1	1	1
AF-P23837-F1-model_v2_&_NOBFS_0	ALPHAFOLD	{u'b1129': 1}	82.996	{u'b1129': {u'A': [True, 82.99602880658436]}}	[u'AF-P23837-F1-model_v2_&_NOBFS_0']	486	1	1	1
AF-P23839-F1-model_v2_&_NOBFS_0	ALPHAFOLD	{u'b3644': 1}	89.9402	{u'b3644': {u'A': [True, 89.94017421602788]}}	[u'AF-P23839-F1-model_v2_&_NOBFS_0']	287	1	1	1
AF-P23840-F1-model_v2_&_NOBFS_0	ALPHAFOLD	{u'b3645': 1}	88.2453	{u'b3645': {u'A': [True, 88.24532846715329]}}	[u'AF-P23840-F1-model_v2_&_NOBFS_0']	274	1	1	1
AF-P23841-F1-model_v2_&_NOBFS_0	ALPHAFOLD	{u'b2405': 1}	91.849	{u'b2405': {u'A': [True, 91.84904761904762]}}	[u'AF-P23841-F1-model_v2_&_NOBFS_0']	294	1	1	1
AF-P23842-F1-model_v2_&_NOBFS_0	ALPHAFOLD	{u'b2395': 1}	87.8024	{u'b2395': {u'A': [True, 87.80241426611796]}}	[u'AF-P23842-F1-model_v2_&_NOBFS_0']	729	1	1	1
AF-P23843-F1-model_v2_&_NOBFS_0	ALPHAFOLD	{u'b1243': 1}	95.1038	{u'b1243': {u'A': [True, 95.10383057090239]}}	[u'AF-P23843-F1-model_v2_&_NOBFS_0']	543	1	1	1
AF-P23845-F1-model_v2_&_NOBFS_0	ALPHAFOLD	{u'b2751': 1}	86.1734	{u'b2751': {u'A': [True, 86.17336842105263]}}	[u'AF-P23845-F1-model_v2_&_NOBFS_0']	475	1	1	1
AF-P23847-F1-model_v2_&_NOBFS_0	ALPHAFOLD	{u'b3544': 1}	95.4546	{u'b3544': {u'A': [True, 95.45459813084112]}}	[u'AF-P23847-F1-model_v2_&_NOBFS_0']	535	1	1	1
AF-P23849-F1-model_v2_&_NOBFS_0	ALPHAFOLD	{u'b1363': 1}	89.0903	{u'b1363': {u'A': [True, 89.09026804123711]}}	[u'AF-P23849-F1-model_v2_&_NOBFS_0']	485	1	1	1
AF-P23857-F1-model_v2_&_NOBFS_0	ALPHAFOLD	{u'b1308': 1}	91.3268	{u'b1308': {u'A': [True, 91.32682692307692]}}	[u'AF-P23857-F1-model_v2_&_NOBFS_0']	104	1	1	1
AF-P23862-F1-model_v2_&_NOBFS_0	ALPHAFOLD	{u'b0467': 1}	78.3596	{u'b0467': {u'A': [True, 78.3596]}}	[u'AF-P23862-F1-model_v2_&_NOBFS_0']	175	1	1	1
AF-P23865-F1-model_v2_&_NOBFS_0	ALPHAFOLD	{u'b1830': 1}	92.4638	{u'b1830': {u'A': [True, 92.46384164222873]}}	[u'AF-P23865-F1-model_v2_&_NOBFS_0']	682	1	1	1
AF-P23869-F1-model_v2_&_NOBFS_0	ALPHAFOLD	{u'b0525': 1}	98.2331	{u'b0525': {u'A': [True, 98.23310975609756]}}	[u'AF-P23869-F1-model_v2_&_NOBFS_0']	164	1	1	1
AF-P23871-F1-model_v2_&_NOBFS_0	ALPHAFOLD	{u'b0475': 1}	97.271	{u'b0475': {u'A': [True, 97.27096875]}}	[u'AF-P23871-F1-model_v2_&_NOBFS_0']	320	1	1	1
AF-P23872-F1-model_v2_&_NOBFS_0	ALPHAFOLD	{u'b0476': 1}	98.218	{u'b0476': {u'A': [True, 98.21796238244515]}}	[u'AF-P23872-F1-model_v2_&_NOBFS_0']	319	1	1	1
AF-P23873-F1-model_v2_&_NOBFS_0	ALPHAFOLD	{u'b1508': 1}	88.2293	{u'b1508': {u'A': [True, 88.22931818181819]}}	[u'AF-P23873-F1-model_v2_&_NOBFS_0']	88	1	1	1
AF-P23874-F1-model_v2_&_NOBFS_0	ALPHAFOLD	{u'b1507': 1}	94.6217	{u'b1507': {u'A': [True, 94.62168181818183]}}	[u'AF-P23874-F1-model_v2_&_NOBFS_0']	440	1	1	1
[truncated: 2,302 more rows]

## Sheet: 001F-bestItasser
	stype	gene_stoichiometry	total_quality	pdb_quality	identical_structures	AA_length	percent_true	quality_rank	percent_true_rank
3MG1_ECOLI_model1_clean_residues_removed_&_NOBFS_0	ITASSER	{u'b3549': 1}	99.7	{u'b3549': {u'X': [True, 99.7]}}	[u'3MG1_ECOLI_model1_clean_residues_removed_&_NOBFS_0']	187	1	1	1
3MG2_ECOLI_model1_clean_residues_removed_&_NOBFS_0	ITASSER	{u'b2068': 1}	100	{u'b2068': {u'X': [True, 100.0]}}	[u'3MG2_ECOLI_model1_clean_residues_removed_&_NOBFS_0']	282	1	1	1
6PGD_ECOLI_model1_clean_residues_removed_&_NOBFS_0	ITASSER	{u'b2029': 1}	93.5	{u'b2029': {u'X': [True, 93.5]}}	[u'6PGD_ECOLI_model1_clean_residues_removed_&_NOBFS_0']	468	1	1	1
6PGL_ECOLI_model1_clean_residues_removed_&_NOBFS_0	ITASSER	{u'b0767': 1}	99.7	{u'b0767': {u'X': [True, 99.7]}}	[u'6PGL_ECOLI_model1_clean_residues_removed_&_NOBFS_0']	331	1	1	1
AAEB_ECOLI_model1_clean_residues_removed_&_NOBFS_0	ITASSER	{u'b3240': 1}	81	{u'b3240': {u'X': [True, 81.0]}}	[u'AAEB_ECOLI_model1_clean_residues_removed_&_NOBFS_0']	655	1	1	1
AAER_ECOLI_model1_clean_residues_removed_&_NOBFS_0	ITASSER	{u'b3243': 1}	65.6	{u'b3243': {u'X': [True, 65.6]}}	[u'AAER_ECOLI_model1_clean_residues_removed_&_NOBFS_0']	309	1	1	1
AAEX_ECOLI_model1_clean_residues_removed_&_NOBFS_0	ITASSER	{u'b3242': 1}	70.5	{u'b3242': {u'X': [True, 70.5]}}	[u'AAEX_ECOLI_model1_clean_residues_removed_&_NOBFS_0']	67	1	1	1
AAS_ECOLI_model1_clean_residues_removed_&_NOBFS_0	ITASSER	{u'b2836': 1}	66.1026	{u'b2836': {u'X': [True, 66.1026]}}	[u'AAS_ECOLI_model1_clean_residues_removed_&_NOBFS_0']	719	1	1	1
AAT_ECOLI_model1_clean_residues_removed_&_NOBFS_0	ITASSER	{u'b0928': 1}	94.7	{u'b0928': {u'X': [True, 94.7]}}	[u'AAT_ECOLI_model1_clean_residues_removed_&_NOBFS_0']	396	1	1	1
ABDH_ECOLI_model1_clean_residues_removed_&_NOBFS_0	ITASSER	{u'b1444': 1}	100	{u'b1444': {u'X': [True, 100.0]}}	[u'ABDH_ECOLI_model1_clean_residues_removed_&_NOBFS_0']	474	1	1	1
ABGA_ECOLI_model1_clean_residues_removed_&_NOBFS_0	ITASSER	{u'b1338': 1}	82.8	{u'b1338': {u'X': [True, 82.8]}}	[u'ABGA_ECOLI_model1_clean_residues_removed_&_NOBFS_0']	436	1	1	1
ABGB_ECOLI_model1_clean_residues_removed_&_NOBFS_0	ITASSER	{u'b1337': 1}	63.726	{u'b1337': {u'X': [True, 63.726]}}	[u'ABGB_ECOLI_model1_clean_residues_removed_&_NOBFS_0']	481	1	1	1
ABGR_ECOLI_model1_clean_residues_removed_&_NOBFS_0	ITASSER	{u'b1339': 1}	67.6	{u'b1339': {u'X': [True, 67.6]}}	[u'ABGR_ECOLI_model1_clean_residues_removed_&_NOBFS_0']	302	1	1	1
ABGT_ECOLI_model1_clean_residues_removed_&_NOBFS_0	ITASSER	{u'b1336': 1}	53.244	{u'b1336': {u'X': [True, 53.244]}}	[u'ABGT_ECOLI_model1_clean_residues_removed_&_NOBFS_0']	508	1	1	1
ABRB_ECOLI_model1_clean_residues_removed_&_NOBFS_0	ITASSER	{u'b0715': 1}	40.9	{u'b0715': {u'X': [False, 40.9]}}	[u'ABRB_ECOLI_model1_clean_residues_removed_&_NOBFS_0']	348	0	1	1
ACCA_ECOLI_model1_clean_residues_removed_&_NOBFS_0	ITASSER	{u'b0185': 1}	96.3	{u'b0185': {u'X': [True, 96.3]}}	[u'ACCA_ECOLI_model1_clean_residues_removed_&_NOBFS_0']	319	1	1	1
ACCC_ECOLI_model1_clean_residues_removed_&_NOBFS_0	ITASSER	{u'b3256': 1}	86.2	{u'b3256': {u'X': [True, 86.2]}}	[u'ACCC_ECOLI_model1_clean_residues_removed_&_NOBFS_0']	449	1	1	1
ACCD_ECOLI_model1_clean_residues_removed_&_NOBFS_0	ITASSER	{u'b2316': 1}	82.192	{u'b2316': {u'X': [True, 82.19200000000001]}}	[u'ACCD_ECOLI_model1_clean_residues_removed_&_NOBFS_0']	304	1	1	1
ACDH_ECOLI_model1_clean_residues_removed_&_NOBFS_0	ITASSER	{u'b0351': 1}	98.7	{u'b0351': {u'X': [True, 98.7]}}	[u'ACDH_ECOLI_model1_clean_residues_removed_&_NOBFS_0']	316	1	1	1
ACEA_ECOLI_model1_clean_residues_removed_&_NOBFS_0	ITASSER	{u'b4015': 1}	88.8932	{u'b4015': {u'X': [True, 88.8932]}}	[u'ACEA_ECOLI_model1_clean_residues_removed_&_NOBFS_0']	434	1	1	1
ACEK_ECOLI_model1_clean_residues_removed_&_NOBFS_0	ITASSER	{u'b4016': 1}	46.3	{u'b4016': {u'X': [False, 46.3]}}	[u'ACEK_ECOLI_model1_clean_residues_removed_&_NOBFS_0']	578	0	1	1
ACFD_ECOLI_model1_clean_residues_removed_&_NOBFS_0	ITASSER	{u'b4466': 1}	38.6	{u'b4466': {u'X': [False, 38.6]}}	[u'ACFD_ECOLI_model1_clean_residues_removed_&_NOBFS_0']	1520	0	1	1
ACKA_ECOLI_model1_clean_residues_removed_&_NOBFS_0	ITASSER	{u'b2296': 1}	88.9	{u'b2296': {u'X': [True, 88.9]}}	[u'ACKA_ECOLI_model1_clean_residues_removed_&_NOBFS_0']	400	1	1	1
ACON1_ECOLI_model1_clean_residues_removed_&_NOBFS_0	ITASSER	{u'b1276': 1}	98.6	{u'b1276': {u'X': [True, 98.6]}}	[u'ACON1_ECOLI_model1_clean_residues_removed_&_NOBFS_0']	891	1	1	1
ACON2_ECOLI_model1_clean_residues_removed_&_NOBFS_0	ITASSER	{u'b0118': 1}	99.8	{u'b0118': {u'X': [True, 99.8]}}	[u'ACON2_ECOLI_model1_clean_residues_removed_&_NOBFS_0']	865	1	1	1
ACPH_ECOLI_model1_clean_residues_removed_&_NOBFS_0	ITASSER	{u'b0404': 1}	48.9	{u'b0404': {u'X': [False, 48.9]}}	[u'ACPH_ECOLI_model1_clean_residues_removed_&_NOBFS_0']	193	0	1	1
ACPS_ECOLI_model1_clean_residues_removed_&_NOBFS_0	ITASSER	{u'b2563': 1}	87.2	{u'b2563': {u'X': [True, 87.2]}}	[u'ACPS_ECOLI_model1_clean_residues_removed_&_NOBFS_0']	126	1	1	1
ACPT_ECOLI_model1_clean_residues_removed_&_NOBFS_0	ITASSER	{u'b3475': 1}	88.2	{u'b3475': {u'X': [True, 88.2]}}	[u'ACPT_ECOLI_model1_clean_residues_removed_&_NOBFS_0']	195	1	1	1
ACP_ECOLI_model1_clean_residues_removed_&_NOBFS_0	ITASSER	{u'b1094': 1}	99.1	{u'b1094': {u'X': [True, 99.1]}}	[u'ACP_ECOLI_model1_clean_residues_removed_&_NOBFS_0']	78	1	1	1
ACRA_ECOLI_model1_clean_residues_removed_&_NOBFS_0	ITASSER	{u'b0463': 1}	45	{u'b0463': {u'X': [False, 45.0]}}	[u'ACRA_ECOLI_model1_clean_residues_removed_&_NOBFS_0']	397	0	1	1
ACRB_ECOLI_model1_clean_residues_removed_&_NOBFS_0	ITASSER	{u'b0462': 1}	43.2	{u'b0462': {u'X': [False, 43.20000000000001]}}	[u'ACRB_ECOLI_model1_clean_residues_removed_&_NOBFS_0']	1049	0	1	1
ACRD_ECOLI_model1_clean_residues_removed_&_NOBFS_0	ITASSER	{u'b2470': 1}	44.5	{u'b2470': {u'X': [False, 44.5]}}	[u'ACRD_ECOLI_model1_clean_residues_removed_&_NOBFS_0']	1037	0	1	1
ACRE_ECOLI_model1_clean_residues_removed_&_NOBFS_0	ITASSER	{u'b3265': 1}	45.1	{u'b3265': {u'X': [False, 45.1]}}	[u'ACRE_ECOLI_model1_clean_residues_removed_&_NOBFS_0']	385	0	1	1
ACRF_ECOLI_model1_clean_residues_removed_&_NOBFS_0	ITASSER	{u'b3266': 1}	43.1	{u'b3266': {u'X': [False, 43.1]}}	[u'ACRF_ECOLI_model1_clean_residues_removed_&_NOBFS_0']	1034	0	1	1
ACRR_ECOLI_model1_clean_residues_removed_&_NOBFS_0	ITASSER	{u'b0464': 1}	78.8	{u'b0464': {u'X': [True, 78.8]}}	[u'ACRR_ECOLI_model1_clean_residues_removed_&_NOBFS_0']	215	1	1	1
ACSA_ECOLI_model1_clean_residues_removed_&_NOBFS_0	ITASSER	{u'b4069': 1}	99	{u'b4069': {u'X': [True, 99.0]}}	[u'ACSA_ECOLI_model1_clean_residues_removed_&_NOBFS_0']	652	1	1	1
ACTP_ECOLI_model1_clean_residues_removed_&_NOBFS_0	ITASSER	{u'b4067': 1}	51.5016	{u'b4067': {u'X': [True, 51.5016]}}	[u'ACTP_ECOLI_model1_clean_residues_removed_&_NOBFS_0']	549	1	1	1
ACYP_ECOLI_model1_clean_residues_removed_&_NOBFS_0	ITASSER	{u'b0968': 1}	81.3	{u'b0968': {u'X': [True, 81.3]}}	[u'ACYP_ECOLI_model1_clean_residues_removed_&_NOBFS_0']	92	1	1	1
ADA_ECOLI_model1_clean_residues_removed_&_NOBFS_0	ITASSER	{u'b2213': 1}	73.2	{u'b2213': {u'X': [True, 73.2]}}	[u'ADA_ECOLI_model1_clean_residues_removed_&_NOBFS_0']	354	1	1	1
ADD_ECOLI_model1_clean_residues_removed_&_NOBFS_0	ITASSER	{u'b1623': 1}	84.9	{u'b1623': {u'X': [True, 84.9]}}	[u'ADD_ECOLI_model1_clean_residues_removed_&_NOBFS_0']	333	1	1	1
ADEC_ECOLI_model1_clean_residues_removed_&_NOBFS_0	ITASSER	{u'b3665': 1}	61.5	{u'b3665': {u'X': [True, 61.5]}}	[u'ADEC_ECOLI_model1_clean_residues_removed_&_NOBFS_0']	588	1	1	1
ADH2_ECOLI_model1_clean_residues_removed_&_NOBFS_0	ITASSER	{u'b3589': 1}	93.5	{u'b3589': {u'X': [True, 93.5]}}	[u'ADH2_ECOLI_model1_clean_residues_removed_&_NOBFS_0']	383	1	1	1
ADHE_ECOLI_model1_clean_residues_removed_&_NOBFS_0	ITASSER	{u'b1241': 1}	30.8636	{u'b1241': {u'X': [False, 30.863599999999998]}}	[u'ADHE_ECOLI_model1_clean_residues_removed_&_NOBFS_0']	891	0	1	1
ADHP_ECOLI_model1_clean_residues_removed_&_NOBFS_0	ITASSER	{u'b1478': 1}	99	{u'b1478': {u'X': [True, 99.0]}}	[u'ADHP_ECOLI_model1_clean_residues_removed_&_NOBFS_0']	336	1	1	1
ADIA_ECOLI_model1_clean_residues_removed_&_NOBFS_0	ITASSER	{u'b4117': 1}	89.9	{u'b4117': {u'X': [True, 89.9]}}	[u'ADIA_ECOLI_model1_clean_residues_removed_&_NOBFS_0']	755	1	1	1
ADIC_ECOLI_model1_clean_residues_removed_&_NOBFS_0	ITASSER	{u'b4115': 1}	67.524	{u'b4115': {u'X': [True, 67.524]}}	[u'ADIC_ECOLI_model1_clean_residues_removed_&_NOBFS_0']	445	1	1	1
ADIY_ECOLI_model1_clean_residues_removed_&_NOBFS_0	ITASSER	{u'b4116': 1}	48.5	{u'b4116': {u'X': [False, 48.5]}}	[u'ADIY_ECOLI_model1_clean_residues_removed_&_NOBFS_0']	253	0	1	1
ADPP_ECOLI_model1_clean_residues_removed_&_NOBFS_0	ITASSER	{u'b3034': 1}	89	{u'b3034': {u'X': [True, 89.0]}}	[u'ADPP_ECOLI_model1_clean_residues_removed_&_NOBFS_0']	209	1	1	1
AEEP_ECOLI_model1_clean_residues_removed_&_NOBFS_0	ITASSER	{u'b1325': 1}	98.4	{u'b1325': {u'X': [True, 98.4]}}	[u'AEEP_ECOLI_model1_clean_residues_removed_&_NOBFS_0']	321	1	1	1
AEGA_ECOLI_model1_clean_residues_removed_&_NOBFS_0	ITASSER	{u'b2468': 1}	48.4803	{u'b2468': {u'X': [False, 48.48030000000001]}}	[u'AEGA_ECOLI_model1_clean_residues_removed_&_NOBFS_0']	659	0	1	1
AER_ECOLI_model1_clean_residues_removed_&_NOBFS_0	ITASSER	{u'b3072': 1}	51.6609	{u'b3072': {u'X': [True, 51.66089999999999]}}	[u'AER_ECOLI_model1_clean_residues_removed_&_NOBFS_0']	506	1	1	1
AES_ECOLI_model1_clean_residues_removed_&_NOBFS_0	ITASSER	{u'b0476': 1}	91.9	{u'b0476': {u'X': [True, 91.9]}}	[u'AES_ECOLI_model1_clean_residues_removed_&_NOBFS_0']	319	1	1	1
AG43_ECOLI_model1_clean_residues_removed_&_NOBFS_0	ITASSER	{u'b2000': 1}	43.7598	{u'b2000': {u'X': [False, 43.75979999999999]}}	[u'AG43_ECOLI_model1_clean_residues_removed_&_NOBFS_0']	1039	0	1	1
AGAA_ECOLI_model1_clean_residues_removed_&_NOBFS_0	ITASSER	{u'b3135': 1}	72	{u'b3135': {u'X': [True, 72.0]}}	[u'AGAA_ECOLI_model1_clean_residues_removed_&_NOBFS_0']	167	1	1	1
AGAI_ECOLI_model1_clean_residues_removed_&_NOBFS_0	ITASSER	{u'b3141': 1}	85.2	{u'b3141': {u'X': [True, 85.2]}}	[u'AGAI_ECOLI_model1_clean_residues_removed_&_NOBFS_0']	251	1	1	1
AGAL_ECOLI_model1_clean_residues_removed_&_NOBFS_0	ITASSER	{u'b4119': 1}	94.2	{u'b4119': {u'X': [True, 94.2]}}	[u'AGAL_ECOLI_model1_clean_residues_removed_&_NOBFS_0']	451	1	1	1
AGAR_ECOLI_model1_clean_residues_removed_&_NOBFS_0	ITASSER	{u'b3131': 1}	59.1	{u'b3131': {u'X': [True, 59.099999999999994]}}	[u'AGAR_ECOLI_model1_clean_residues_removed_&_NOBFS_0']	269	1	1	1
AGAS_ECOLI_model1_clean_residues_removed_&_NOBFS_0	ITASSER	{u'b3136': 1}	80.8	{u'b3136': {u'X': [True, 80.8]}}	[u'AGAS_ECOLI_model1_clean_residues_removed_&_NOBFS_0']	384	1	1	1
AGP_ECOLI_model1_clean_residues_removed_&_NOBFS_0	ITASSER	{u'b1002': 1}	97.2	{u'b1002': {u'X': [True, 97.2]}}	[u'AGP_ECOLI_model1_clean_residues_removed_&_NOBFS_0']	413	1	1	1
AHPC_ECOLI_model1_clean_residues_removed_&_NOBFS_0	ITASSER	{u'b0605': 1}	99.4	{u'b0605': {u'X': [True, 99.4]}}	[u'AHPC_ECOLI_model1_clean_residues_removed_&_NOBFS_0']	187	1	1	1
AHPF_ECOLI_model1_clean_residues_removed_&_NOBFS_0	ITASSER	{u'b0606': 1}	99.9	{u'b0606': {u'X': [True, 99.9]}}	[u'AHPF_ECOLI_model1_clean_residues_removed_&_NOBFS_0']	521	1	1	1
AIDB_ECOLI_model1_clean_residues_removed_&_NOBFS_0	ITASSER	{u'b4187': 1}	77	{u'b4187': {u'X': [True, 77.0]}}	[u'AIDB_ECOLI_model1_clean_residues_removed_&_NOBFS_0']	541	1	1	1
AIS_ECOLI_model1_clean_residues_removed_&_NOBFS_0	ITASSER	{u'b2252': 1}	45.892	{u'b2252': {u'X': [False, 45.891999999999996]}}	[u'AIS_ECOLI_model1_clean_residues_removed_&_NOBFS_0']	200	0	1	1
AK1H_ECOLI_model1_clean_residues_removed_&_NOBFS_0	ITASSER	{u'b0002': 1}	71.6	{u'b0002': {u'X': [True, 71.6]}}	[u'AK1H_ECOLI_model1_clean_residues_removed_&_NOBFS_0']	820	1	1	1
AK2H_ECOLI_model1_clean_residues_removed_&_NOBFS_0	ITASSER	{u'b3940': 1}	41.325	{u'b3940': {u'X': [False, 41.324999999999996]}}	[u'AK2H_ECOLI_model1_clean_residues_removed_&_NOBFS_0']	810	0	1	1
AK3_ECOLI_model1_clean_residues_removed_&_NOBFS_0	ITASSER	{u'b4024': 1}	99.8	{u'b4024': {u'X': [True, 99.8]}}	[u'AK3_ECOLI_model1_clean_residues_removed_&_NOBFS_0']	449	1	1	1
ALDA_ECOLI_model1_clean_residues_removed_&_NOBFS_0	ITASSER	{u'b1415': 1}	96.5	{u'b1415': {u'X': [True, 96.5]}}	[u'ALDA_ECOLI_model1_clean_residues_removed_&_NOBFS_0']	479	1	1	1
ALDB_ECOLI_model1_clean_residues_removed_&_NOBFS_0	ITASSER	{u'b3588': 1}	92.5536	{u'b3588': {u'X': [True, 92.5536]}}	[u'ALDB_ECOLI_model1_clean_residues_removed_&_NOBFS_0']	512	1	1	1
ALF1_ECOLI_model1_clean_residues_removed_&_NOBFS_0	ITASSER	{u'b2097': 1}	76.86	{u'b2097': {u'X': [True, 76.86000000000001]}}	[u'ALF1_ECOLI_model1_clean_residues_removed_&_NOBFS_0']	350	1	1	1
ALF_ECOLI_model1_clean_residues_removed_&_NOBFS_0	ITASSER	{u'b2925': 1}	99.0016	{u'b2925': {u'X': [True, 99.0016]}}	[u'ALF_ECOLI_model1_clean_residues_removed_&_NOBFS_0']	359	1	1	1
ALKB_ECOLI_model1_clean_residues_removed_&_NOBFS_0	ITASSER	{u'b2212': 1}	94.5684	{u'b2212': {u'X': [True, 94.5684]}}	[u'ALKB_ECOLI_model1_clean_residues_removed_&_NOBFS_0']	216	1	1	1
ALKH_ECOLI_model1_clean_residues_removed_&_NOBFS_0	ITASSER	{u'b1850': 1}	99.8	{u'b1850': {u'X': [True, 99.8]}}	[u'ALKH_ECOLI_model1_clean_residues_removed_&_NOBFS_0']	213	1	1	1
ALLA_ECOLI_model1_clean_residues_removed_&_NOBFS_0	ITASSER	{u'b0505': 1}	98.7	{u'b0505': {u'X': [True, 98.7]}}	[u'ALLA_ECOLI_model1_clean_residues_removed_&_NOBFS_0']	160	1	1	1
ALLB_ECOLI_model1_clean_residues_removed_&_NOBFS_0	ITASSER	{u'b0512': 1}	97.8	{u'b0512': {u'X': [True, 97.8]}}	[u'ALLB_ECOLI_model1_clean_residues_removed_&_NOBFS_0']	453	1	1	1
ALLC_ECOLI_model1_clean_residues_removed_&_NOBFS_0	ITASSER	{u'b0516': 1}	92.9	{u'b0516': {u'X': [True, 92.9]}}	[u'ALLC_ECOLI_model1_clean_residues_removed_&_NOBFS_0']	411	1	1	1
ALLD_ECOLI_model1_clean_residues_removed_&_NOBFS_0	ITASSER	{u'b0517': 1}	88.2	{u'b0517': {u'X': [True, 88.2]}}	[u'ALLD_ECOLI_model1_clean_residues_removed_&_NOBFS_0']	349	1	1	1
ALLP_ECOLI_model1_clean_residues_removed_&_NOBFS_0	ITASSER	{u'b0511': 1}	62.5	{u'b0511': {u'X': [True, 62.5]}}	[u'ALLP_ECOLI_model1_clean_residues_removed_&_NOBFS_0']	484	1	1	1
ALLR_ECOLI_model1_clean_residues_removed_&_NOBFS_0	ITASSER	{u'b0506': 1}	83.6666	{u'b0506': {u'X': [True, 83.66660000000002]}}	[u'ALLR_ECOLI_model1_clean_residues_removed_&_NOBFS_0']	271	1	1	1
ALLS_ECOLI_model1_clean_residues_removed_&_NOBFS_0	ITASSER	{u'b0504': 1}	66.3	{u'b0504': {u'X': [True, 66.3]}}	[u'ALLS_ECOLI_model1_clean_residues_removed_&_NOBFS_0']	308	1	1	1
ALPA_ECOLI_model1_clean_residues_removed_&_NOBFS_0	ITASSER	{u'b2624': 1}	49.8	{u'b2624': {u'X': [False, 49.8]}}	[u'ALPA_ECOLI_model1_clean_residues_removed_&_NOBFS_0']	70	0	1	1
ALR1_ECOLI_model1_clean_residues_removed_&_NOBFS_0	ITASSER	{u'b4053': 1}	95	{u'b4053': {u'X': [True, 95.0]}}	[u'ALR1_ECOLI_model1_clean_residues_removed_&_NOBFS_0']	359	1	1	1
ALR2_ECOLI_model1_clean_residues_removed_&_NOBFS_0	ITASSER	{u'b1190': 1}	94.7	{u'b1190': {u'X': [True, 94.7]}}	[u'ALR2_ECOLI_model1_clean_residues_removed_&_NOBFS_0']	356	1	1	1
ALSA_ECOLI_model1_clean_residues_removed_&_NOBFS_0	ITASSER	{u'b4087': 1}	57.6	{u'b4087': {u'X': [True, 57.60000000000001]}}	[u'ALSA_ECOLI_model1_clean_residues_removed_&_NOBFS_0']	510	1	1	1
ALSB_ECOLI_model1_clean_residues_removed_&_NOBFS_0	ITASSER	{u'b4088': 1}	96.2	{u'b4088': {u'X': [True, 96.2]}}	[u'ALSB_ECOLI_model1_clean_residues_removed_&_NOBFS_0']	311	1	1	1
ALSC_ECOLI_model1_clean_residues_removed_&_NOBFS_0	ITASSER	{u'b4086': 1}	76	{u'b4086': {u'X': [True, 76.0]}}	[u'ALSC_ECOLI_model1_clean_residues_removed_&_NOBFS_0']	326	1	1	1
ALSE_ECOLI_model1_clean_residues_removed_&_NOBFS_0	ITASSER	{u'b4085': 1}	87.9417	{u'b4085': {u'X': [True, 87.9417]}}	[u'ALSE_ECOLI_model1_clean_residues_removed_&_NOBFS_0']	231	1	1	1
ALSK_ECOLI_model1_clean_residues_removed_&_NOBFS_0	ITASSER	{u'b4084': 1}	93.9	{u'b4084': {u'X': [True, 93.9]}}	[u'ALSK_ECOLI_model1_clean_residues_removed_&_NOBFS_0']	309	1	1	1
ALX_ECOLI_model1_clean_residues_removed_&_NOBFS_0	ITASSER	{u'b3088': 1}	42.1	{u'b3088': {u'X': [False, 42.1]}}	[u'ALX_ECOLI_model1_clean_residues_removed_&_NOBFS_0']	321	0	1	1
AMIA_ECOLI_model1_clean_residues_removed_&_NOBFS_0	ITASSER	{u'b2435': 1}	62.034	{u'b2435': {u'X': [True, 62.034000000000006]}}	[u'AMIA_ECOLI_model1_clean_residues_removed_&_NOBFS_0']	289	1	1	1
AMIB_ECOLI_model1_clean_residues_removed_&_NOBFS_0	ITASSER	{u'b4169': 1}	64	{u'b4169': {u'X': [True, 64.0]}}	[u'AMIB_ECOLI_model1_clean_residues_removed_&_NOBFS_0']	445	1	1	1
AMIC_ECOLI_model1_clean_residues_removed_&_NOBFS_0	ITASSER	{u'b2817': 1}	37.4976	{u'b2817': {u'X': [False, 37.4976]}}	[u'AMIC_ECOLI_model1_clean_residues_removed_&_NOBFS_0']	417	0	1	1
AMID_ECOLI_model1_clean_residues_removed_&_NOBFS_0	ITASSER	{u'b0867': 1}	57.4	{u'b0867': {u'X': [True, 57.4]}}	[u'AMID_ECOLI_model1_clean_residues_removed_&_NOBFS_0']	276	1	1	1
AMN_ECOLI_model1_clean_residues_removed_&_NOBFS_0	ITASSER	{u'b1982': 1}	97	{u'b1982': {u'X': [True, 97.0]}}	[u'AMN_ECOLI_model1_clean_residues_removed_&_NOBFS_0']	484	1	1	1
AMO_ECOLI_model1_clean_residues_removed_&_NOBFS_0	ITASSER	{u'b1386': 1}	83.1726	{u'b1386': {u'X': [True, 83.17259999999999]}}	[u'AMO_ECOLI_model1_clean_residues_removed_&_NOBFS_0']	757	1	1	1
AMPA_ECOLI_model1_clean_residues_removed_&_NOBFS_0	ITASSER	{u'b4260': 1}	100	{u'b4260': {u'X': [True, 100.0]}}	[u'AMPA_ECOLI_model1_clean_residues_removed_&_NOBFS_0']	503	1	1	1
AMPC_ECOLI_model1_clean_residues_removed_&_NOBFS_0	ITASSER	{u'b4150': 1}	77.4	{u'b4150': {u'X': [True, 77.4]}}	[u'AMPC_ECOLI_model1_clean_residues_removed_&_NOBFS_0']	377	1	1	1
AMPD_ECOLI_model1_clean_residues_removed_&_NOBFS_0	ITASSER	{u'b0110': 1}	98.8	{u'b0110': {u'X': [True, 98.8]}}	[u'AMPD_ECOLI_model1_clean_residues_removed_&_NOBFS_0']	183	1	1	1
AMPE_ECOLI_model1_clean_residues_removed_&_NOBFS_0	ITASSER	{u'b0111': 1}	72.8	{u'b0111': {u'X': [True, 72.8]}}	[u'AMPE_ECOLI_model1_clean_residues_removed_&_NOBFS_0']	284	1	1	1
AMPG_ECOLI_model1_clean_residues_removed_&_NOBFS_0	ITASSER	{u'b0433': 1}	70.8883	{u'b0433': {u'X': [True, 70.88829999999999]}}	[u'AMPG_ECOLI_model1_clean_residues_removed_&_NOBFS_0']	491	1	1	1
AMPH_ECOLI_model1_clean_residues_removed_&_NOBFS_0	ITASSER	{u'b0376': 1}	73.842	{u'b0376': {u'X': [True, 73.842]}}	[u'AMPH_ECOLI_model1_clean_residues_removed_&_NOBFS_0']	385	1	1	1
AMPM_ECOLI_model1_clean_residues_removed_&_NOBFS_0	ITASSER	{u'b0168': 1}	98.3	{u'b0168': {u'X': [True, 98.3]}}	[u'AMPM_ECOLI_model1_clean_residues_removed_&_NOBFS_0']	264	1	1	1
AMPN_ECOLI_model1_clean_residues_removed_&_NOBFS_0	ITASSER	{u'b0932': 1}	68.6	{u'b0932': {u'X': [True, 68.6]}}	[u'AMPN_ECOLI_model1_clean_residues_removed_&_NOBFS_0']	870	1	1	1
AMPP_ECOLI_model1_clean_residues_removed_&_NOBFS_0	ITASSER	{u'b2908': 1}	99.8	{u'b2908': {u'X': [True, 99.8]}}	[u'AMPP_ECOLI_model1_clean_residues_removed_&_NOBFS_0']	441	1	1	1
AMTB_ECOLI_model1_clean_residues_removed_&_NOBFS_0	ITASSER	{u'b0451': 1}	94.0875	{u'b0451': {u'X': [True, 94.08749999999999]}}	[u'AMTB_ECOLI_model1_clean_residues_removed_&_NOBFS_0']	428	1	1	1
AMY1_ECOLI_model1_clean_residues_removed_&_NOBFS_0	ITASSER	{u'b3571': 1}	70.4	{u'b3571': {u'X': [True, 70.4]}}	[u'AMY1_ECOLI_model1_clean_residues_removed_&_NOBFS_0']	676	1	1	1
AMY2_ECOLI_model1_clean_residues_removed_&_NOBFS_0	ITASSER	{u'b1927': 1}	97.1	{u'b1927': {u'X': [True, 97.1]}}	[u'AMY2_ECOLI_model1_clean_residues_removed_&_NOBFS_0']	495	1	1	1
ANMK_ECOLI_model1_clean_residues_removed_&_NOBFS_0	ITASSER	{u'b1640': 1}	64.4	{u'b1640': {u'X': [True, 64.4]}}	[u'ANMK_ECOLI_model1_clean_residues_removed_&_NOBFS_0']	369	1	1	1
APAG_ECOLI_model1_clean_residues_removed_&_NOBFS_0	ITASSER	{u'b0050': 1}	97	{u'b0050': {u'X': [True, 97.0]}}	[u'APAG_ECOLI_model1_clean_residues_removed_&_NOBFS_0']	125	1	1	1
APAH_ECOLI_model1_clean_residues_removed_&_NOBFS_0	ITASSER	{u'b0049': 1}	70.8	{u'b0049': {u'X': [True, 70.8]}}	[u'APAH_ECOLI_model1_clean_residues_removed_&_NOBFS_0']	280	1	1	1
APBE_ECOLI_model1_clean_residues_removed_&_NOBFS_0	ITASSER	{u'b2214': 1}	87.1266	{u'b2214': {u'X': [True, 87.12659999999998]}}	[u'APBE_ECOLI_model1_clean_residues_removed_&_NOBFS_0']	351	1	1	1
APHA_ECOLI_model1_clean_residues_removed_&_NOBFS_0	ITASSER	{u'b4055': 1}	88.8	{u'b4055': {u'X': [True, 88.8]}}	[u'APHA_ECOLI_model1_clean_residues_removed_&_NOBFS_0']	237	1	1	1
APPB_ECOLI_model1_clean_residues_removed_&_NOBFS_0	ITASSER	{u'b0979': 1}	89	{u'b0979': {u'X': [True, 89.0]}}	[u'APPB_ECOLI_model1_clean_residues_removed_&_NOBFS_0']	378	1	1	1
APPC_ECOLI_model1_clean_residues_removed_&_NOBFS_0	ITASSER	{u'b0978': 1}	51.3706	{u'b0978': {u'X': [True, 51.370599999999996]}}	[u'APPC_ECOLI_model1_clean_residues_removed_&_NOBFS_0']	514	1	1	1
APPY_ECOLI_model1_clean_residues_removed_&_NOBFS_0	ITASSER	{u'b0564': 1}	49.4	{u'b0564': {u'X': [False, 49.4]}}	[u'APPY_ECOLI_model1_clean_residues_removed_&_NOBFS_0']	249	0	1	1
APT_ECOLI_model1_clean_residues_removed_&_NOBFS_0	ITASSER	{u'b0469': 1}	88.7	{u'b0469': {u'X': [True, 88.7]}}	[u'APT_ECOLI_model1_clean_residues_removed_&_NOBFS_0']	183	1	1	1
AQPZ_ECOLI_model1_clean_residues_removed_&_NOBFS_0	ITASSER	{u'b0875': 1}	98.7	{u'b0875': {u'X': [True, 98.7]}}	[u'AQPZ_ECOLI_model1_clean_residues_removed_&_NOBFS_0']	231	1	1	1
ARAA_ECOLI_model1_clean_residues_removed_&_NOBFS_0	ITASSER	{u'b0062': 1}	99.7	{u'b0062': {u'X': [True, 99.7]}}	[u'ARAA_ECOLI_model1_clean_residues_removed_&_NOBFS_0']	500	1	1	1
ARAB_ECOLI_model1_clean_residues_removed_&_NOBFS_0	ITASSER	{u'b0063': 1}	54.2	{u'b0063': {u'X': [True, 54.2]}}	[u'ARAB_ECOLI_model1_clean_residues_removed_&_NOBFS_0']	566	1	1	1
ARAC_ECOLI_model1_clean_residues_removed_&_NOBFS_0	ITASSER	{u'b0064': 1}	49	{u'b0064': {u'X': [False, 49.0]}}	[u'ARAC_ECOLI_model1_clean_residues_removed_&_NOBFS_0']	292	0	1	1
ARAD_ECOLI_model1_clean_residues_removed_&_NOBFS_0	ITASSER	{u'b0061': 1}	98.2	{u'b0061': {u'X': [True, 98.2]}}	[u'ARAD_ECOLI_model1_clean_residues_removed_&_NOBFS_0']	231	1	1	1
ARAE_ECOLI_model1_clean_residues_removed_&_NOBFS_0	ITASSER	{u'b2841': 1}	92.1	{u'b2841': {u'X': [True, 92.1]}}	[u'ARAE_ECOLI_model1_clean_residues_removed_&_NOBFS_0']	472	1	1	1
ARAF_ECOLI_model1_clean_residues_removed_&_NOBFS_0	ITASSER	{u'b1901': 1}	96.3	{u'b1901': {u'X': [True, 96.3]}}	[u'ARAF_ECOLI_model1_clean_residues_removed_&_NOBFS_0']	329	1	1	1
ARAG_ECOLI_model1_clean_residues_removed_&_NOBFS_0	ITASSER	{u'b1900': 1}	58.2	{u'b1900': {u'X': [True, 58.20000000000001]}}	[u'ARAG_ECOLI_model1_clean_residues_removed_&_NOBFS_0']	504	1	1	1
ARAH_ECOLI_model1_clean_residues_removed_&_NOBFS_0	ITASSER	{u'b4460': 1}	54.1	{u'b4460': {u'X': [True, 54.1]}}	[u'ARAH_ECOLI_model1_clean_residues_removed_&_NOBFS_0']	328	1	1	1
ARAJ_ECOLI_model1_clean_residues_removed_&_NOBFS_0	ITASSER	{u'b0396': 1}	72.3	{u'b0396': {u'X': [True, 72.3]}}	[u'ARAJ_ECOLI_model1_clean_residues_removed_&_NOBFS_0']	394	1	1	1
ARCA_ECOLI_model1_clean_residues_removed_&_NOBFS_0	ITASSER	{u'b4401': 1}	59.5	{u'b4401': {u'X': [True, 59.5]}}	[u'ARCA_ECOLI_model1_clean_residues_removed_&_NOBFS_0']	238	1	1	1
ARCB_ECOLI_model1_clean_residues_removed_&_NOBFS_0	ITASSER	{u'b3210': 1}	51.3	{u'b3210': {u'X': [True, 51.300000000000004]}}	[u'ARCB_ECOLI_model1_clean_residues_removed_&_NOBFS_0']	778	1	1	1
ARCC_ECOLI_model1_clean_residues_removed_&_NOBFS_0	ITASSER	{u'b0521': 1}	96.8	{u'b0521': {u'X': [True, 96.8]}}	[u'ARCC_ECOLI_model1_clean_residues_removed_&_NOBFS_0']	297	1	1	1
ARCD_ECOLI_model1_clean_residues_removed_&_NOBFS_0	ITASSER	{u'b1605': 1}	64.3104	{u'b1605': {u'X': [True, 64.3104]}}	[u'ARCD_ECOLI_model1_clean_residues_removed_&_NOBFS_0']	460	1	1	1
ARCL_ECOLI_model1_clean_residues_removed_&_NOBFS_0	ITASSER	{u'b2874': 1}	98	{u'b2874': {u'X': [True, 98.0]}}	[u'ARCL_ECOLI_model1_clean_residues_removed_&_NOBFS_0']	310	1	1	1
ARCM_ECOLI_model1_clean_residues_removed_&_NOBFS_0	ITASSER	{u'b0323': 1}	99	{u'b0323': {u'X': [True, 99.0]}}	[u'ARCM_ECOLI_model1_clean_residues_removed_&_NOBFS_0']	316	1	1	1
ARGA_ECOLI_model1_clean_residues_removed_&_NOBFS_0	ITASSER	{u'b2818': 1}	71.2	{u'b2818': {u'X': [True, 71.2]}}	[u'ARGA_ECOLI_model1_clean_residues_removed_&_NOBFS_0']	443	1	1	1
ARGB_ECOLI_model1_clean_residues_removed_&_NOBFS_0	ITASSER	{u'b3959': 1}	100	{u'b3959': {u'X': [True, 100.0]}}	[u'ARGB_ECOLI_model1_clean_residues_removed_&_NOBFS_0']	258	1	1	1
ARGC_ECOLI_model1_clean_residues_removed_&_NOBFS_0	ITASSER	{u'b3958': 1}	99.3	{u'b3958': {u'X': [True, 99.3]}}	[u'ARGC_ECOLI_model1_clean_residues_removed_&_NOBFS_0']	334	1	1	1
ARGD_ECOLI_model1_clean_residues_removed_&_NOBFS_0	ITASSER	{u'b3359': 1}	91.3	{u'b3359': {u'X': [True, 91.3]}}	[u'ARGD_ECOLI_model1_clean_residues_removed_&_NOBFS_0']	406	1	1	1
ARGE_ECOLI_model1_clean_residues_removed_&_NOBFS_0	ITASSER	{u'b3957': 1}	75	{u'b3957': {u'X': [True, 75.0]}}	[u'ARGE_ECOLI_model1_clean_residues_removed_&_NOBFS_0']	383	1	1	1
ARGK_ECOLI_model1_clean_residues_removed_&_NOBFS_0	ITASSER	{u'b2918': 1}	93.8	{u'b2918': {u'X': [True, 93.8]}}	[u'ARGK_ECOLI_model1_clean_residues_removed_&_NOBFS_0']	331	1	1	1
ARGO_ECOLI_model1_clean_residues_removed_&_NOBFS_0	ITASSER	{u'b2923': 1}	60.4	{u'b2923': {u'X': [True, 60.4]}}	[u'ARGO_ECOLI_model1_clean_residues_removed_&_NOBFS_0']	211	1	1	1
ARGR_ECOLI_model1_clean_residues_removed_&_NOBFS_0	ITASSER	{u'b3237': 1}	73.2	{u'b3237': {u'X': [True, 73.2]}}	[u'ARGR_ECOLI_model1_clean_residues_removed_&_NOBFS_0']	156	1	1	1
ARGT_ECOLI_model1_clean_residues_removed_&_NOBFS_0	ITASSER	{u'b2310': 1}	94.2645	{u'b2310': {u'X': [True, 94.26450000000001]}}	[u'ARGT_ECOLI_model1_clean_residues_removed_&_NOBFS_0']	260	1	1	1
ARIR_ECOLI_model1_clean_residues_removed_&_NOBFS_0	ITASSER	{u'b1166': 1}	58.7	{u'b1166': {u'X': [True, 58.70000000000001]}}	[u'ARIR_ECOLI_model1_clean_residues_removed_&_NOBFS_0']	88	1	1	1
ARLY_ECOLI_model1_clean_residues_removed_&_NOBFS_0	ITASSER	{u'b3960': 1}	99.7	{u'b3960': {u'X': [True, 99.7]}}	[u'ARLY_ECOLI_model1_clean_residues_removed_&_NOBFS_0']	457	1	1	1
ARNA_ECOLI_model1_clean_residues_removed_&_NOBFS_0	ITASSER	{u'b2255': 1}	95.4	{u'b2255': {u'X': [True, 95.4]}}	[u'ARNA_ECOLI_model1_clean_residues_removed_&_NOBFS_0']	660	1	1	1
ARNB_ECOLI_model1_clean_residues_removed_&_NOBFS_0	ITASSER	{u'b2253': 1}	95.2512	{u'b2253': {u'X': [True, 95.2512]}}	[u'ARNB_ECOLI_model1_clean_residues_removed_&_NOBFS_0']	385	1	1	1
ARNC_ECOLI_model1_clean_residues_removed_&_NOBFS_0	ITASSER	{u'b2254': 1}	66.6	{u'b2254': {u'X': [True, 66.6]}}	[u'ARNC_ECOLI_model1_clean_residues_removed_&_NOBFS_0']	322	1	1	1
ARND_ECOLI_model1_clean_residues_removed_&_NOBFS_0	ITASSER	{u'b2256': 1}	70.4	{u'b2256': {u'X': [True, 70.4]}}	[u'ARND_ECOLI_model1_clean_residues_removed_&_NOBFS_0']	296	1	1	1
ARNE_ECOLI_model1_clean_residues_removed_&_NOBFS_0	ITASSER	{u'b4544': 1}	49.9	{u'b4544': {u'X': [False, 49.9]}}	[u'ARNE_ECOLI_model1_clean_residues_removed_&_NOBFS_0']	111	0	1	1
ARNF_ECOLI_model1_clean_residues_removed_&_NOBFS_0	ITASSER	{u'b2258': 1}	45.6	{u'b2258': {u'X': [False, 45.6]}}	[u'ARNF_ECOLI_model1_clean_residues_removed_&_NOBFS_0']	128	0	1	1
ARNT_ECOLI_model1_clean_residues_removed_&_NOBFS_0	ITASSER	{u'b2257': 1}	39.9	{u'b2257': {u'X': [False, 39.9]}}	[u'ARNT_ECOLI_model1_clean_residues_removed_&_NOBFS_0']	550	0	1	1
AROA_ECOLI_model1_clean_residues_removed_&_NOBFS_0	ITASSER	{u'b0908': 1}	100	{u'b0908': {u'X': [True, 100.0]}}	[u'AROA_ECOLI_model1_clean_residues_removed_&_NOBFS_0']	427	1	1	1
AROB_ECOLI_model1_clean_residues_removed_&_NOBFS_0	ITASSER	{u'b3389': 1}	88.1	{u'b3389': {u'X': [True, 88.1]}}	[u'AROB_ECOLI_model1_clean_residues_removed_&_NOBFS_0']	362	1	1	1
AROC_ECOLI_model1_clean_residues_removed_&_NOBFS_0	ITASSER	{u'b2329': 1}	97.6	{u'b2329': {u'X': [True, 97.6]}}	[u'AROC_ECOLI_model1_clean_residues_removed_&_NOBFS_0']	361	1	1	1
AROD_ECOLI_model1_clean_residues_removed_&_NOBFS_0	ITASSER	{u'b1693': 1}	88.6	{u'b1693': {u'X': [True, 88.6]}}	[u'AROD_ECOLI_model1_clean_residues_removed_&_NOBFS_0']	252	1	1	1
AROE_ECOLI_model1_clean_residues_removed_&_NOBFS_0	ITASSER	{u'b3281': 1}	99.8	{u'b3281': {u'X': [True, 99.8]}}	[u'AROE_ECOLI_model1_clean_residues_removed_&_NOBFS_0']	272	1	1	1
AROF_ECOLI_model1_clean_residues_removed_&_NOBFS_0	ITASSER	{u'b2601': 1}	93.3472	{u'b2601': {u'X': [True, 93.3472]}}	[u'AROF_ECOLI_model1_clean_residues_removed_&_NOBFS_0']	356	1	1	1
AROG_ECOLI_model1_clean_residues_removed_&_NOBFS_0	ITASSER	{u'b0754': 1}	95.2	{u'b0754': {u'X': [True, 95.2]}}	[u'AROG_ECOLI_model1_clean_residues_removed_&_NOBFS_0']	350	1	1	1
AROH_ECOLI_model1_clean_residues_removed_&_NOBFS_0	ITASSER	{u'b1704': 1}	93.67	{u'b1704': {u'X': [True, 93.66999999999999]}}	[u'AROH_ECOLI_model1_clean_residues_removed_&_NOBFS_0']	348	1	1	1
AROK_ECOLI_model1_clean_residues_removed_&_NOBFS_0	ITASSER	{u'b3390': 1}	85.2	{u'b3390': {u'X': [True, 85.2]}}	[u'AROK_ECOLI_model1_clean_residues_removed_&_NOBFS_0']	173	1	1	1
AROL_ECOLI_model1_clean_residues_removed_&_NOBFS_0	ITASSER	{u'b0388': 1}	84	{u'b0388': {u'X': [True, 84.0]}}	[u'AROL_ECOLI_model1_clean_residues_removed_&_NOBFS_0']	174	1	1	1
AROM_ECOLI_model1_clean_residues_removed_&_NOBFS_0	ITASSER	{u'b0390': 1}	73.1	{u'b0390': {u'X': [True, 73.1]}}	[u'AROM_ECOLI_model1_clean_residues_removed_&_NOBFS_0']	225	1	1	1
AROP_ECOLI_model1_clean_residues_removed_&_NOBFS_0	ITASSER	{u'b0112': 1}	67	{u'b0112': {u'X': [True, 67.0]}}	[u'AROP_ECOLI_model1_clean_residues_removed_&_NOBFS_0']	457	1	1	1
ARPA_ECOLI_model1_clean_residues_removed_&_NOBFS_0	ITASSER	{u'b4017': 1}	36.2585	{u'b4017': {u'X': [False, 36.258500000000005]}}	[u'ARPA_ECOLI_model1_clean_residues_removed_&_NOBFS_0']	728	0	1	1
ARSB_ECOLI_model1_clean_residues_removed_&_NOBFS_0	ITASSER	{u'b3502': 1}	52.7	{u'b3502': {u'X': [True, 52.7]}}	[u'ARSB_ECOLI_model1_clean_residues_removed_&_NOBFS_0']	429	1	1	1
ARSC_ECOLI_model1_clean_residues_removed_&_NOBFS_0	ITASSER	{u'b3503': 1}	72.4	{u'b3503': {u'X': [True, 72.4]}}	[u'ARSC_ECOLI_model1_clean_residues_removed_&_NOBFS_0']	141	1	1	1
ARSR_ECOLI_model1_clean_residues_removed_&_NOBFS_0	ITASSER	{u'b3501': 1}	65	{u'b3501': {u'X': [True, 65.0]}}	[u'ARSR_ECOLI_model1_clean_residues_removed_&_NOBFS_0']	117	1	1	1
ARTI_ECOLI_model1_clean_residues_removed_&_NOBFS_0	ITASSER	{u'b0863': 1}	86.7	{u'b0863': {u'X': [True, 86.7]}}	[u'ARTI_ECOLI_model1_clean_residues_removed_&_NOBFS_0']	243	1	1	1
ARTJ_ECOLI_model1_clean_residues_removed_&_NOBFS_0	ITASSER	{u'b0860': 1}	86.3	{u'b0860': {u'X': [True, 86.3]}}	[u'ARTJ_ECOLI_model1_clean_residues_removed_&_NOBFS_0']	243	1	1	1
ARTM_ECOLI_model1_clean_residues_removed_&_NOBFS_0	ITASSER	{u'b0861': 1}	89.3	{u'b0861': {u'X': [True, 89.3]}}	[u'ARTM_ECOLI_model1_clean_residues_removed_&_NOBFS_0']	222	1	1	1
ARTP_ECOLI_model1_clean_residues_removed_&_NOBFS_0	ITASSER	{u'b0864': 1}	91	{u'b0864': {u'X': [True, 91.0]}}	[u'ARTP_ECOLI_model1_clean_residues_removed_&_NOBFS_0']	242	1	1	1
ARTQ_ECOLI_model1_clean_residues_removed_&_NOBFS_0	ITASSER	{u'b0862': 1}	85.1	{u'b0862': {u'X': [True, 85.1]}}	[u'ARTQ_ECOLI_model1_clean_residues_removed_&_NOBFS_0']	238	1	1	1
ASCB_ECOLI_model1_clean_residues_removed_&_NOBFS_0	ITASSER	{u'b2716': 1}	89.4	{u'b2716': {u'X': [True, 89.4]}}	[u'ASCB_ECOLI_model1_clean_residues_removed_&_NOBFS_0']	474	1	1	1
ASCG_ECOLI_model1_clean_residues_removed_&_NOBFS_0	ITASSER	{u'b2714': 1}	91.3	{u'b2714': {u'X': [True, 91.3]}}	[u'ASCG_ECOLI_model1_clean_residues_removed_&_NOBFS_0']	336	1	1	1
ASLA_ECOLI_model1_clean_residues_removed_&_NOBFS_0	ITASSER	{u'b3801': 1}	74.132	{u'b3801': {u'X': [True, 74.132]}}	[u'ASLA_ECOLI_model1_clean_residues_removed_&_NOBFS_0']	551	1	1	1
ASLB_ECOLI_model1_clean_residues_removed_&_NOBFS_0	ITASSER	{u'b3800': 1}	76.0193	{u'b3800': {u'X': [True, 76.01930000000002]}}	[u'ASLB_ECOLI_model1_clean_residues_removed_&_NOBFS_0']	411	1	1	1
ASNA_ECOLI_model1_clean_residues_removed_&_NOBFS_0	ITASSER	{u'b3744': 1}	99.4	{u'b3744': {u'X': [True, 99.4]}}	[u'ASNA_ECOLI_model1_clean_residues_removed_&_NOBFS_0']	330	1	1	1
ASNB_ECOLI_model1_clean_residues_removed_&_NOBFS_0	ITASSER	{u'b0674': 1}	91.3872	{u'b0674': {u'X': [True, 91.3872]}}	[u'ASNB_ECOLI_model1_clean_residues_removed_&_NOBFS_0']	554	1	1	1
ASNC_ECOLI_model1_clean_residues_removed_&_NOBFS_0	ITASSER	{u'b3743': 1}	88.3	{u'b3743': {u'X': [True, 88.3]}}	[u'ASNC_ECOLI_model1_clean_residues_removed_&_NOBFS_0']	152	1	1	1
ASPA_ECOLI_model1_clean_residues_removed_&_NOBFS_0	ITASSER	{u'b4139': 1}	97.8	{u'b4139': {u'X': [True, 97.8]}}	[u'ASPA_ECOLI_model1_clean_residues_removed_&_NOBFS_0']	478	1	1	1
ASPG1_ECOLI_model1_clean_residues_removed_&_NOBFS_0	ITASSER	{u'b1767': 1}	83.9	{u'b1767': {u'X': [True, 83.9]}}	[u'ASPG1_ECOLI_model1_clean_residues_removed_&_NOBFS_0']	338	1	1	1
ASPG2_ECOLI_model1_clean_residues_removed_&_NOBFS_0	ITASSER	{u'b2957': 1}	96.8	{u'b2957': {u'X': [True, 96.8]}}	[u'ASPG2_ECOLI_model1_clean_residues_removed_&_NOBFS_0']	348	1	1	1
ASR_ECOLI_model1_clean_residues_removed_&_NOBFS_0	ITASSER	{u'b1597': 1}	53	{u'b1597': {u'X': [True, 53.0]}}	[u'ASR_ECOLI_model1_clean_residues_removed_&_NOBFS_0']	102	1	1	1
ASSY_ECOLI_model1_clean_residues_removed_&_NOBFS_0	ITASSER	{u'b3172': 1}	94.8	{u'b3172': {u'X': [True, 94.8]}}	[u'ASSY_ECOLI_model1_clean_residues_removed_&_NOBFS_0']	447	1	1	1
ASTA_ECOLI_model1_clean_residues_removed_&_NOBFS_0	ITASSER	{u'b1747': 1}	93.6	{u'b1747': {u'X': [True, 93.6]}}	[u'ASTA_ECOLI_model1_clean_residues_removed_&_NOBFS_0']	344	1	1	1
ASTB_ECOLI_model1_clean_residues_removed_&_NOBFS_0	ITASSER	{u'b1745': 1}	99.2	{u'b1745': {u'X': [True, 99.2]}}	[u'ASTB_ECOLI_model1_clean_residues_removed_&_NOBFS_0']	447	1	1	1
ASTC_ECOLI_model1_clean_residues_removed_&_NOBFS_0	ITASSER	{u'b1748': 1}	90.9	{u'b1748': {u'X': [True, 90.9]}}	[u'ASTC_ECOLI_model1_clean_residues_removed_&_NOBFS_0']	406	1	1	1
ASTD_ECOLI_model1_clean_residues_removed_&_NOBFS_0	ITASSER	{u'b1746': 1}	87.979	{u'b1746': {u'X': [True, 87.979]}}	[u'ASTD_ECOLI_model1_clean_residues_removed_&_NOBFS_0']	492	1	1	1
ASTE_ECOLI_model1_clean_residues_removed_&_NOBFS_0	ITASSER	{u'b1744': 1}	96.4	{u'b1744': {u'X': [True, 96.4]}}	[u'ASTE_ECOLI_model1_clean_residues_removed_&_NOBFS_0']	322	1	1	1
ATDA_ECOLI_model1_clean_residues_removed_&_NOBFS_0	ITASSER	{u'b1584': 1}	73.4	{u'b1584': {u'X': [True, 73.4]}}	[u'ATDA_ECOLI_model1_clean_residues_removed_&_NOBFS_0']	186	1	1	1
ATKA_ECOLI_model1_clean_residues_removed_&_NOBFS_0	ITASSER	{u'b0698': 1}	39.56	{u'b0698': {u'X': [False, 39.56]}}	[u'ATKA_ECOLI_model1_clean_residues_removed_&_NOBFS_0']	557	0	1	1
ATKB_ECOLI_model1_clean_residues_removed_&_NOBFS_0	ITASSER	{u'b0697': 1}	48.2	{u'b0697': {u'X': [False, 48.2]}}	[u'ATKB_ECOLI_model1_clean_residues_removed_&_NOBFS_0']	682	0	1	1
ATKC_ECOLI_model1_clean_residues_removed_&_NOBFS_0	ITASSER	{u'b0696': 1}	49	{u'b0696': {u'X': [False, 49.0]}}	[u'ATKC_ECOLI_model1_clean_residues_removed_&_NOBFS_0']	190	0	1	1
ATMA_ECOLI_model1_clean_residues_removed_&_NOBFS_0	ITASSER	{u'b4242': 1}	92.3	{u'b4242': {u'X': [True, 92.3]}}	[u'ATMA_ECOLI_model1_clean_residues_removed_&_NOBFS_0']	898	1	1	1
ATOA_ECOLI_model1_clean_residues_removed_&_NOBFS_0	ITASSER	{u'b2222': 1}	90.7	{u'b2222': {u'X': [True, 90.7]}}	[u'ATOA_ECOLI_model1_clean_residues_removed_&_NOBFS_0']	216	1	1	1
ATOB_ECOLI_model1_clean_residues_removed_&_NOBFS_0	ITASSER	{u'b2224': 1}	99.2	{u'b2224': {u'X': [True, 99.2]}}	[u'ATOB_ECOLI_model1_clean_residues_removed_&_NOBFS_0']	394	1	1	1
ATOC_ECOLI_model1_clean_residues_removed_&_NOBFS_0	ITASSER	{u'b2220': 1}	76.3872	{u'b2220': {u'X': [True, 76.38719999999999]}}	[u'ATOC_ECOLI_model1_clean_residues_removed_&_NOBFS_0']	461	1	1	1
ATOD_ECOLI_model1_clean_residues_removed_&_NOBFS_0	ITASSER	{u'b2221': 1}	94.9	{u'b2221': {u'X': [True, 94.9]}}	[u'ATOD_ECOLI_model1_clean_residues_removed_&_NOBFS_0']	220	1	1	1
ATOE_ECOLI_model1_clean_residues_removed_&_NOBFS_0	ITASSER	{u'b2223': 1}	78	{u'b2223': {u'X': [True, 78.0]}}	[u'ATOE_ECOLI_model1_clean_residues_removed_&_NOBFS_0']	440	1	1	1
ATOS_ECOLI_model1_clean_residues_removed_&_NOBFS_0	ITASSER	{u'b2219': 1}	33.0625	{u'b2219': {u'X': [False, 33.0625]}}	[u'ATOS_ECOLI_model1_clean_residues_removed_&_NOBFS_0']	608	0	1	1
ATP6_ECOLI_model1_clean_residues_removed_&_NOBFS_0	ITASSER	{u'b3738': 1}	54.2276	{u'b3738': {u'X': [True, 54.22760000000001]}}	[u'ATP6_ECOLI_model1_clean_residues_removed_&_NOBFS_0']	271	1	1	1
ATPA_ECOLI_model1_clean_residues_removed_&_NOBFS_0	ITASSER	{u'b3734': 1}	92.5	{u'b3734': {u'X': [True, 92.5]}}	[u'ATPA_ECOLI_model1_clean_residues_removed_&_NOBFS_0']	513	1	1	1
ATPB_ECOLI_model1_clean_residues_removed_&_NOBFS_0	ITASSER	{u'b3732': 1}	98.4	{u'b3732': {u'X': [True, 98.4]}}	[u'ATPB_ECOLI_model1_clean_residues_removed_&_NOBFS_0']	460	1	1	1
ATPD_ECOLI_model1_clean_residues_removed_&_NOBFS_0	ITASSER	{u'b3735': 1}	47.9765	{u'b3735': {u'X': [False, 47.976499999999994]}}	[u'ATPD_ECOLI_model1_clean_residues_removed_&_NOBFS_0']	177	0	1	1
ATPE_ECOLI_model1_clean_residues_removed_&_NOBFS_0	ITASSER	{u'b3731': 1}	98.4	{u'b3731': {u'X': [True, 98.4]}}	[u'ATPE_ECOLI_model1_clean_residues_removed_&_NOBFS_0']	139	1	1	1
ATPF_ECOLI_model1_clean_residues_removed_&_NOBFS_0	ITASSER	{u'b3736': 1}	80	{u'b3736': {u'X': [True, 80.0]}}	[u'ATPF_ECOLI_model1_clean_residues_removed_&_NOBFS_0']	156	1	1	1
ATPG_ECOLI_model1_clean_residues_removed_&_NOBFS_0	ITASSER	{u'b3733': 1}	79.4	{u'b3733': {u'X': [True, 79.4]}}	[u'ATPG_ECOLI_model1_clean_residues_removed_&_NOBFS_0']	287	1	1	1
ATPL_ECOLI_model1_clean_residues_removed_&_NOBFS_0	ITASSER	{u'b3737': 1}	97.8	{u'b3737': {u'X': [True, 97.8]}}	[u'ATPL_ECOLI_model1_clean_residues_removed_&_NOBFS_0']	79	1	1	1
ATPZ_ECOLI_model1_clean_residues_removed_&_NOBFS_0	ITASSER	{u'b3739': 1}	65.7	{u'b3739': {u'X': [True, 65.7]}}	[u'ATPZ_ECOLI_model1_clean_residues_removed_&_NOBFS_0']	126	1	1	1
ATZN_ECOLI_model1_clean_residues_removed_&_NOBFS_0	ITASSER	{u'b3469': 1}	41.031	{u'b3469': {u'X': [False, 41.031]}}	[u'ATZN_ECOLI_model1_clean_residues_removed_&_NOBFS_0']	732	0	1	1
AVTA_ECOLI_model1_clean_residues_removed_&_NOBFS_0	ITASSER	{u'b3572': 1}	79.7	{u'b3572': {u'X': [True, 79.7]}}	[u'AVTA_ECOLI_model1_clean_residues_removed_&_NOBFS_0']	417	1	1	1
AZOR_ECOLI_model1_clean_residues_removed_&_NOBFS_0	ITASSER	{u'b1412': 1}	98.7	{u'b1412': {u'X': [True, 98.7]}}	[u'AZOR_ECOLI_model1_clean_residues_removed_&_NOBFS_0']	201	1	1	1
BAER_ECOLI_model1_clean_residues_removed_&_NOBFS_0	ITASSER	{u'b2079': 1}	59.8	{u'b2079': {u'X': [True, 59.8]}}	[u'BAER_ECOLI_model1_clean_residues_removed_&_NOBFS_0']	240	1	1	1
BAES_ECOLI_model1_clean_residues_removed_&_NOBFS_0	ITASSER	{u'b2078': 1}	50.6088	{u'b2078': {u'X': [True, 50.608799999999995]}}	[u'BAES_ECOLI_model1_clean_residues_removed_&_NOBFS_0']	467	1	1	1
BARA_ECOLI_model1_clean_residues_removed_&_NOBFS_0	ITASSER	{u'b2786': 1}	50.1	{u'b2786': {u'X': [True, 50.1]}}	[u'BARA_ECOLI_model1_clean_residues_removed_&_NOBFS_0']	918	1	1	1
BASR_ECOLI_model1_clean_residues_removed_&_NOBFS_0	ITASSER	{u'b4113': 1}	96.8	{u'b4113': {u'X': [True, 96.8]}}	[u'BASR_ECOLI_model1_clean_residues_removed_&_NOBFS_0']	222	1	1	1
BASS_ECOLI_model1_clean_residues_removed_&_NOBFS_0	ITASSER	{u'b4112': 1}	38.5317	{u'b4112': {u'X': [False, 38.5317]}}	[u'BASS_ECOLI_model1_clean_residues_removed_&_NOBFS_0']	363	0	1	1
BAX_ECOLI_model1_clean_residues_removed_&_NOBFS_0	ITASSER	{u'b3570': 1}	27.148	{u'b3570': {u'X': [False, 27.148]}}	[u'BAX_ECOLI_model1_clean_residues_removed_&_NOBFS_0']	274	0	1	1
BCCP_ECOLI_model1_clean_residues_removed_&_NOBFS_0	ITASSER	{u'b3255': 1}	59.5	{u'b3255': {u'X': [True, 59.5]}}	[u'BCCP_ECOLI_model1_clean_residues_removed_&_NOBFS_0']	156	1	1	1
BCP_ECOLI_model1_clean_residues_removed_&_NOBFS_0	ITASSER	{u'b2480': 1}	84	{u'b2480': {u'X': [True, 84.0]}}	[u'BCP_ECOLI_model1_clean_residues_removed_&_NOBFS_0']	156	1	1	1
BCR_ECOLI_model1_clean_residues_removed_&_NOBFS_0	ITASSER	{u'b2182': 1}	72.3	{u'b2182': {u'X': [True, 72.3]}}	[u'BCR_ECOLI_model1_clean_residues_removed_&_NOBFS_0']	396	1	1	1
BCSA_ECOLI_model1_clean_residues_removed_&_NOBFS_0	ITASSER	{u'b3533': 1}	87.8	{u'b3533': {u'X': [True, 87.8]}}	[u'BCSA_ECOLI_model1_clean_residues_removed_&_NOBFS_0']	872	1	1	1
BCSB_ECOLI_model1_clean_residues_removed_&_NOBFS_0	ITASSER	{u'b3532': 1}	85.0751	{u'b3532': {u'X': [True, 85.07510000000002]}}	[u'BCSB_ECOLI_model1_clean_residues_removed_&_NOBFS_0']	779	1	1	1
BCSC_ECOLI_model1_clean_residues_removed_&_NOBFS_0	ITASSER	{u'b3530': 1}	51.072	{u'b3530': {u'X': [True, 51.07200000000001]}}	[u'BCSC_ECOLI_model1_clean_residues_removed_&_NOBFS_0']	1157	1	1	1
BDM_ECOLI_model1_clean_residues_removed_&_NOBFS_0	ITASSER	{u'b1481': 1}	55.4	{u'b1481': {u'X': [True, 55.39999999999999]}}	[u'BDM_ECOLI_model1_clean_residues_removed_&_NOBFS_0']	71	1	1	1
BEEE_ECOLI_model1_clean_residues_removed_&_NOBFS_0	ITASSER	{u'b1151': 1}	46.7	{u'b1151': {u'X': [False, 46.7]}}	[u'BEEE_ECOLI_model1_clean_residues_removed_&_NOBFS_0']	157	0	1	1
BETA_ECOLI_model1_clean_residues_removed_&_NOBFS_0	ITASSER	{u'b0311': 1}	81.3768	{u'b0311': {u'X': [True, 81.37680000000002]}}	[u'BETA_ECOLI_model1_clean_residues_removed_&_NOBFS_0']	556	1	1	1
BETB_ECOLI_model1_clean_residues_removed_&_NOBFS_0	ITASSER	{u'b0312': 1}	95.8	{u'b0312': {u'X': [True, 95.8]}}	[u'BETB_ECOLI_model1_clean_residues_removed_&_NOBFS_0']	490	1	1	1
BETI_ECOLI_model1_clean_residues_removed_&_NOBFS_0	ITASSER	{u'b0313': 1}	81.7	{u'b0313': {u'X': [True, 81.7]}}	[u'BETI_ECOLI_model1_clean_residues_removed_&_NOBFS_0']	195	1	1	1
BETT_ECOLI_model1_clean_residues_removed_&_NOBFS_0	ITASSER	{u'b0314': 1}	33.8514	{u'b0314': {u'X': [False, 33.851400000000005]}}	[u'BETT_ECOLI_model1_clean_residues_removed_&_NOBFS_0']	677	0	1	1
BFD_ECOLI_model1_clean_residues_removed_&_NOBFS_0	ITASSER	{u'b3337': 1}	53.9	{u'b3337': {u'X': [True, 53.900000000000006]}}	[u'BFD_ECOLI_model1_clean_residues_removed_&_NOBFS_0']	64	1	1	1
BFR_ECOLI_model1_clean_residues_removed_&_NOBFS_0	ITASSER	{u'b3336': 1}	98	{u'b3336': {u'X': [True, 98.0]}}	[u'BFR_ECOLI_model1_clean_residues_removed_&_NOBFS_0']	158	1	1	1
BGA2_ECOLI_model1_clean_residues_removed_&_NOBFS_0	ITASSER	{u'b3076': 1}	85.6716	{u'b3076': {u'X': [True, 85.6716]}}	[u'BGA2_ECOLI_model1_clean_residues_removed_&_NOBFS_0']	1030	1	1	1
BGAL_ECOLI_model1_clean_residues_removed_&_NOBFS_0	ITASSER	{u'b0344': 1}	88.3	{u'b0344': {u'X': [True, 88.3]}}	[u'BGAL_ECOLI_model1_clean_residues_removed_&_NOBFS_0']	1024	1	1	1
BGLA_ECOLI_model1_clean_residues_removed_&_NOBFS_0	ITASSER	{u'b2901': 1}	89.5	{u'b2901': {u'X': [True, 89.5]}}	[u'BGLA_ECOLI_model1_clean_residues_removed_&_NOBFS_0']	479	1	1	1
BGLB_ECOLI_model1_clean_residues_removed_&_NOBFS_0	ITASSER	{u'b3721': 1}	89.7202	{u'b3721': {u'X': [True, 89.7202]}}	[u'BGLB_ECOLI_model1_clean_residues_removed_&_NOBFS_0']	470	1	1	1
BGLG_ECOLI_model1_clean_residues_removed_&_NOBFS_0	ITASSER	{u'b3723': 1}	73.4	{u'b3723': {u'X': [True, 73.4]}}	[u'BGLG_ECOLI_model1_clean_residues_removed_&_NOBFS_0']	278	1	1	1
BGLH_ECOLI_model1_clean_residues_removed_&_NOBFS_0	ITASSER	{u'b3720': 1}	62.4834	{u'b3720': {u'X': [True, 62.48339999999999]}}	[u'BGLH_ECOLI_model1_clean_residues_removed_&_NOBFS_0']	538	1	1	1
BGLJ_ECOLI_model1_clean_residues_removed_&_NOBFS_0	ITASSER	{u'b4366': 1}	92.8	{u'b4366': {u'X': [True, 92.8]}}	[u'BGLJ_ECOLI_model1_clean_residues_removed_&_NOBFS_0']	225	1	1	1
BGLR_ECOLI_model1_clean_residues_removed_&_NOBFS_0	ITASSER	{u'b1617': 1}	92	{u'b1617': {u'X': [True, 92.0]}}	[u'BGLR_ECOLI_model1_clean_residues_removed_&_NOBFS_0']	603	1	1	1
BGLX_ECOLI_model1_clean_residues_removed_&_NOBFS_0	ITASSER	{u'b2132': 1}	71.4511	{u'b2132': {u'X': [True, 71.4511]}}	[u'BGLX_ECOLI_model1_clean_residues_removed_&_NOBFS_0']	765	1	1	1
BHSA_ECOLI_model1_clean_residues_removed_&_NOBFS_0	ITASSER	{u'b1112': 1}	72.8	{u'b1112': {u'X': [True, 72.8]}}	[u'BHSA_ECOLI_model1_clean_residues_removed_&_NOBFS_0']	85	1	1	1
BIOA_ECOLI_model1_clean_residues_removed_&_NOBFS_0	ITASSER	{u'b0774': 1}	99.9	{u'b0774': {u'X': [True, 99.9]}}	[u'BIOA_ECOLI_model1_clean_residues_removed_&_NOBFS_0']	429	1	1	1
BIOB_ECOLI_model1_clean_residues_removed_&_NOBFS_0	ITASSER	{u'b0775': 1}	88.3456	{u'b0775': {u'X': [True, 88.3456]}}	[u'BIOB_ECOLI_model1_clean_residues_removed_&_NOBFS_0']	346	1	1	1
BIOC_ECOLI_model1_clean_residues_removed_&_NOBFS_0	ITASSER	{u'b0777': 1}	64.7	{u'b0777': {u'X': [True, 64.7]}}	[u'BIOC_ECOLI_model1_clean_residues_removed_&_NOBFS_0']	251	1	1	1
BIOD1_ECOLI_model1_clean_residues_removed_&_NOBFS_0	ITASSER	{u'b0778': 1}	99.7	{u'b0778': {u'X': [True, 99.7]}}	[u'BIOD1_ECOLI_model1_clean_residues_removed_&_NOBFS_0']	225	1	1	1
BIOD2_ECOLI_model1_clean_residues_removed_&_NOBFS_0	ITASSER	{u'b1593': 1}	95.6	{u'b1593': {u'X': [True, 95.6]}}	[u'BIOD2_ECOLI_model1_clean_residues_removed_&_NOBFS_0']	231	1	1	1
BIOF_ECOLI_model1_clean_residues_removed_&_NOBFS_0	ITASSER	{u'b0776': 1}	99.6	{u'b0776': {u'X': [True, 99.6]}}	[u'BIOF_ECOLI_model1_clean_residues_removed_&_NOBFS_0']	384	1	1	1
BIOH_ECOLI_model1_clean_residues_removed_&_NOBFS_0	ITASSER	{u'b3412': 1}	98.2	{u'b3412': {u'X': [True, 98.2]}}	[u'BIOH_ECOLI_model1_clean_residues_removed_&_NOBFS_0']	256	1	1	1
BIRA_ECOLI_model1_clean_residues_removed_&_NOBFS_0	ITASSER	{u'b3973': 1}	99.4	{u'b3973': {u'X': [True, 99.4]}}	[u'BIRA_ECOLI_model1_clean_residues_removed_&_NOBFS_0']	321	1	1	1
BISC_ECOLI_model1_clean_residues_removed_&_NOBFS_0	ITASSER	{u'b3551': 1}	97.7	{u'b3551': {u'X': [True, 97.7]}}	[u'BISC_ECOLI_model1_clean_residues_removed_&_NOBFS_0']	777	1	1	1
BLC_ECOLI_model1_clean_residues_removed_&_NOBFS_0	ITASSER	{u'b4149': 1}	73.9216	{u'b4149': {u'X': [True, 73.9216]}}	[u'BLC_ECOLI_model1_clean_residues_removed_&_NOBFS_0']	177	1	1	1
BLR_ECOLI_model1_clean_residues_removed_&_NOBFS_0	ITASSER	{u'b4409': 1}	70.2	{u'b4409': {u'X': [True, 70.2]}}	[u'BLR_ECOLI_model1_clean_residues_removed_&_NOBFS_0']	41	1	1	1
BOLA_ECOLI_model1_clean_residues_removed_&_NOBFS_0	ITASSER	{u'b0435': 1}	55.6575	{u'b0435': {u'X': [True, 55.6575]}}	[u'BOLA_ECOLI_model1_clean_residues_removed_&_NOBFS_0']	105	1	1	1
BORD_ECOLI_model1_clean_residues_removed_&_NOBFS_0	ITASSER	{u'b0557': 1}	43.8	{u'b0557': {u'X': [False, 43.8]}}	[u'BORD_ECOLI_model1_clean_residues_removed_&_NOBFS_0']	97	0	1	1
BRNQ_ECOLI_model1_clean_residues_removed_&_NOBFS_0	ITASSER	{u'b0401': 1}	70.6	{u'b0401': {u'X': [True, 70.6]}}	[u'BRNQ_ECOLI_model1_clean_residues_removed_&_NOBFS_0']	439	1	1	1
BSMA_ECOLI_model1_clean_residues_removed_&_NOBFS_0	ITASSER	{u'b4189': 1}	71.8	{u'b4189': {u'X': [True, 71.8]}}	[u'BSMA_ECOLI_model1_clean_residues_removed_&_NOBFS_0']	109	1	1	1
BSSR_ECOLI_model1_clean_residues_removed_&_NOBFS_0	ITASSER	{u'b0836': 1}	55.8	{u'b0836': {u'X': [True, 55.8]}}	[u'BSSR_ECOLI_model1_clean_residues_removed_&_NOBFS_0']	127	1	1	1
BSSS_ECOLI_model1_clean_residues_removed_&_NOBFS_0	ITASSER	{u'b1060': 1}	49.7	{u'b1060': {u'X': [False, 49.70000000000001]}}	[u'BSSS_ECOLI_model1_clean_residues_removed_&_NOBFS_0']	84	0	1	1
BTUB_ECOLI_model1_clean_residues_removed_&_NOBFS_0	ITASSER	{u'b3966': 1}	93.6014	{u'b3966': {u'X': [True, 93.6014]}}	[u'BTUB_ECOLI_model1_clean_residues_removed_&_NOBFS_0']	614	1	1	1
BTUC_ECOLI_model1_clean_residues_removed_&_NOBFS_0	ITASSER	{u'b1711': 1}	83.3	{u'b1711': {u'X': [True, 83.3]}}	[u'BTUC_ECOLI_model1_clean_residues_removed_&_NOBFS_0']	326	1	1	1
BTUD_ECOLI_model1_clean_residues_removed_&_NOBFS_0	ITASSER	{u'b1709': 1}	79.2	{u'b1709': {u'X': [True, 79.2]}}	[u'BTUD_ECOLI_model1_clean_residues_removed_&_NOBFS_0']	249	1	1	1
BTUE_ECOLI_model1_clean_residues_removed_&_NOBFS_0	ITASSER	{u'b1710': 1}	82.1	{u'b1710': {u'X': [True, 82.1]}}	[u'BTUE_ECOLI_model1_clean_residues_removed_&_NOBFS_0']	183	1	1	1
BTUF_ECOLI_model1_clean_residues_removed_&_NOBFS_0	ITASSER	{u'b0158': 1}	96	{u'b0158': {u'X': [True, 96.0]}}	[u'BTUF_ECOLI_model1_clean_residues_removed_&_NOBFS_0']	266	1	1	1
BTUR_ECOLI_model1_clean_residues_removed_&_NOBFS_0	ITASSER	{u'b1270': 1}	96	{u'b1270': {u'X': [True, 96.0]}}	[u'BTUR_ECOLI_model1_clean_residues_removed_&_NOBFS_0']	196	1	1	1
C561_ECOLI_model1_clean_residues_removed_&_NOBFS_0	ITASSER	{u'b1418': 1}	72.2	{u'b1418': {u'X': [True, 72.2]}}	[u'C561_ECOLI_model1_clean_residues_removed_&_NOBFS_0']	176	1	1	1
C56H_ECOLI_model1_clean_residues_removed_&_NOBFS_0	ITASSER	{u'b1974': 1}	74.3	{u'b1974': {u'X': [True, 74.3]}}	[u'C56H_ECOLI_model1_clean_residues_removed_&_NOBFS_0']	176	1	1	1
C56I_ECOLI_model1_clean_residues_removed_&_NOBFS_0	ITASSER	{u'b1057': 1}	83.6	{u'b1057': {u'X': [True, 83.6]}}	[u'C56I_ECOLI_model1_clean_residues_removed_&_NOBFS_0']	188	1	1	1
CAAL_ECOLI_model1_clean_residues_removed_&_NOBFS_0	ITASSER	{u'b0581': 1}	96.2	{u'b0581': {u'X': [True, 96.2]}}	[u'CAAL_ECOLI_model1_clean_residues_removed_&_NOBFS_0']	372	1	1	1
CADB_ECOLI_model1_clean_residues_removed_&_NOBFS_0	ITASSER	{u'b4132': 1}	66.7934	{u'b4132': {u'X': [True, 66.7934]}}	[u'CADB_ECOLI_model1_clean_residues_removed_&_NOBFS_0']	444	1	1	1
CADC_ECOLI_model1_clean_residues_removed_&_NOBFS_0	ITASSER	{u'b4133': 1}	33.7212	{u'b4133': {u'X': [False, 33.721199999999996]}}	[u'CADC_ECOLI_model1_clean_residues_removed_&_NOBFS_0']	512	0	1	1
CAIA_ECOLI_model1_clean_residues_removed_&_NOBFS_0	ITASSER	{u'b0039': 1}	99	{u'b0039': {u'X': [True, 99.0]}}	[u'CAIA_ECOLI_model1_clean_residues_removed_&_NOBFS_0']	380	1	1	1
CAIB_ECOLI_model1_clean_residues_removed_&_NOBFS_0	ITASSER	{u'b0038': 1}	95.2	{u'b0038': {u'X': [True, 95.2]}}	[u'CAIB_ECOLI_model1_clean_residues_removed_&_NOBFS_0']	405	1	1	1
CAIC_ECOLI_model1_clean_residues_removed_&_NOBFS_0	ITASSER	{u'b0037': 1}	87.8	{u'b0037': {u'X': [True, 87.8]}}	[u'CAIC_ECOLI_model1_clean_residues_removed_&_NOBFS_0']	517	1	1	1
CAID_ECOLI_model1_clean_residues_removed_&_NOBFS_0	ITASSER	{u'b0036': 1}	95.6	{u'b0036': {u'X': [True, 95.6]}}	[u'CAID_ECOLI_model1_clean_residues_removed_&_NOBFS_0']	261	1	1	1
CAIE_ECOLI_model1_clean_residues_removed_&_NOBFS_0	ITASSER	{u'b0035': 1}	87.2331	{u'b0035': {u'X': [True, 87.23310000000001]}}	[u'CAIE_ECOLI_model1_clean_residues_removed_&_NOBFS_0']	196	1	1	1
CAIF_ECOLI_model1_clean_residues_removed_&_NOBFS_0	ITASSER	{u'b0034': 1}	56.1	{u'b0034': {u'X': [True, 56.10000000000001]}}	[u'CAIF_ECOLI_model1_clean_residues_removed_&_NOBFS_0']	131	1	1	1
CAIT_ECOLI_model1_clean_residues_removed_&_NOBFS_0	ITASSER	{u'b0040': 1}	58.6	{u'b0040': {u'X': [True, 58.599999999999994]}}	[u'CAIT_ECOLI_model1_clean_residues_removed_&_NOBFS_0']	504	1	1	1
CAN_ECOLI_model1_clean_residues_removed_&_NOBFS_0	ITASSER	{u'b0126': 1}	92.8	{u'b0126': {u'X': [True, 92.8]}}	[u'CAN_ECOLI_model1_clean_residues_removed_&_NOBFS_0']	220	1	1	1
CAPP_ECOLI_model1_clean_residues_removed_&_NOBFS_0	ITASSER	{u'b3956': 1}	99.5	{u'b3956': {u'X': [True, 99.5]}}	[u'CAPP_ECOLI_model1_clean_residues_removed_&_NOBFS_0']	883	1	1	1
CARA_ECOLI_model1_clean_residues_removed_&_NOBFS_0	ITASSER	{u'b0032': 1}	99.5	{u'b0032': {u'X': [True, 99.5]}}	[u'CARA_ECOLI_model1_clean_residues_removed_&_NOBFS_0']	382	1	1	1
CARB_ECOLI_model1_clean_residues_removed_&_NOBFS_0	ITASSER	{u'b0033': 1}	100	{u'b0033': {u'X': [True, 100.0]}}	[u'CARB_ECOLI_model1_clean_residues_removed_&_NOBFS_0']	1073	1	1	1
CATE_ECOLI_model1_clean_residues_removed_&_NOBFS_0	ITASSER	{u'b1732': 1}	97.8	{u'b1732': {u'X': [True, 97.8]}}	[u'CATE_ECOLI_model1_clean_residues_removed_&_NOBFS_0']	753	1	1	1
CBL_ECOLI_model1_clean_residues_removed_&_NOBFS_0	ITASSER	{u'b1987': 1}	66.3	{u'b1987': {u'X': [True, 66.3]}}	[u'CBL_ECOLI_model1_clean_residues_removed_&_NOBFS_0']	316	1	1	1
CBPA_ECOLI_model1_clean_residues_removed_&_NOBFS_0	ITASSER	{u'b1000': 1}	62.5	{u'b1000': {u'X': [True, 62.5]}}	[u'CBPA_ECOLI_model1_clean_residues_removed_&_NOBFS_0']	306	1	1	1
CBPM_ECOLI_model1_clean_residues_removed_&_NOBFS_0	ITASSER	{u'b0999': 1}	74.9	{u'b0999': {u'X': [True, 74.9]}}	[u'CBPM_ECOLI_model1_clean_residues_removed_&_NOBFS_0']	101	1	1	1
CBRA_ECOLI_model1_clean_residues_removed_&_NOBFS_0	ITASSER	{u'b3690': 1}	73.1	{u'b3690': {u'X': [True, 73.1]}}	[u'CBRA_ECOLI_model1_clean_residues_removed_&_NOBFS_0']	354	1	1	1
CBRB_ECOLI_model1_clean_residues_removed_&_NOBFS_0	ITASSER	{u'b3716': 1}	47.6	{u'b3716': {u'X': [False, 47.6]}}	[u'CBRB_ECOLI_model1_clean_residues_removed_&_NOBFS_0']	155	0	1	1
CBRC_ECOLI_model1_clean_residues_removed_&_NOBFS_0	ITASSER	{u'b3717': 1}	40.2	{u'b3717': {u'X': [False, 40.2]}}	[u'CBRC_ECOLI_model1_clean_residues_removed_&_NOBFS_0']	195	0	1	1
CBTA_ECOLI_model1_clean_residues_removed_&_NOBFS_0	ITASSER	{u'b2005': 1}	49.5	{u'b2005': {u'X': [False, 49.5]}}	[u'CBTA_ECOLI_model1_clean_residues_removed_&_NOBFS_0']	124	0	1	1
CCA_ECOLI_model1_clean_residues_removed_&_NOBFS_0	ITASSER	{u'b3056': 1}	81.6	{u'b3056': {u'X': [True, 81.6]}}	[u'CCA_ECOLI_model1_clean_residues_removed_&_NOBFS_0']	412	1	1	1
CCMA_ECOLI_model1_clean_residues_removed_&_NOBFS_0	ITASSER	{u'b2201': 1}	83.4	{u'b2201': {u'X': [True, 83.4]}}	[u'CCMA_ECOLI_model1_clean_residues_removed_&_NOBFS_0']	207	1	1	1
CCMB_ECOLI_model1_clean_residues_removed_&_NOBFS_0	ITASSER	{u'b2200': 1}	90.1	{u'b2200': {u'X': [True, 90.1]}}	[u'CCMB_ECOLI_model1_clean_residues_removed_&_NOBFS_0']	220	1	1	1
CCMC_ECOLI_model1_clean_residues_removed_&_NOBFS_0	ITASSER	{u'b2199': 1}	88.6	{u'b2199': {u'X': [True, 88.6]}}	[u'CCMC_ECOLI_model1_clean_residues_removed_&_NOBFS_0']	245	1	1	1
CCMD_ECOLI_model1_clean_residues_removed_&_NOBFS_0	ITASSER	{u'b2198': 1}	74.7	{u'b2198': {u'X': [True, 74.7]}}	[u'CCMD_ECOLI_model1_clean_residues_removed_&_NOBFS_0']	69	1	1	1
CCME_ECOLI_model1_clean_residues_removed_&_NOBFS_0	ITASSER	{u'b2197': 1}	83.3	{u'b2197': {u'X': [True, 83.3]}}	[u'CCME_ECOLI_model1_clean_residues_removed_&_NOBFS_0']	159	1	1	1
CCMF_ECOLI_model1_clean_residues_removed_&_NOBFS_0	ITASSER	{u'b2196': 1}	36	{u'b2196': {u'X': [False, 36.0]}}	[u'CCMF_ECOLI_model1_clean_residues_removed_&_NOBFS_0']	647	0	1	1
CCMH_ECOLI_model1_clean_residues_removed_&_NOBFS_0	ITASSER	{u'b2194': 1}	57.9	{u'b2194': {u'X': [True, 57.9]}}	[u'CCMH_ECOLI_model1_clean_residues_removed_&_NOBFS_0']	350	1	1	1
CDAR_ECOLI_model1_clean_residues_removed_&_NOBFS_0	ITASSER	{u'b0162': 1}	31.4028	{u'b0162': {u'X': [False, 31.4028]}}	[u'CDAR_ECOLI_model1_clean_residues_removed_&_NOBFS_0']	385	0	1	1
CDD_ECOLI_model1_clean_residues_removed_&_NOBFS_0	ITASSER	{u'b2143': 1}	100	{u'b2143': {u'X': [True, 100.0]}}	[u'CDD_ECOLI_model1_clean_residues_removed_&_NOBFS_0']	294	1	1	1
CDH_ECOLI_model1_clean_residues_removed_&_NOBFS_0	ITASSER	{u'b3918': 1}	84.4552	{u'b3918': {u'X': [True, 84.4552]}}	[u'CDH_ECOLI_model1_clean_residues_removed_&_NOBFS_0']	251	1	1	1
CDSA_ECOLI_model1_clean_residues_removed_&_NOBFS_0	ITASSER	{u'b0175': 1}	49.8	{u'b0175': {u'X': [False, 49.8]}}	[u'CDSA_ECOLI_model1_clean_residues_removed_&_NOBFS_0']	285	0	1	1
CEDA_ECOLI_model1_clean_residues_removed_&_NOBFS_0	ITASSER	{u'b1731': 1}	49.1	{u'b1731': {u'X': [False, 49.1]}}	[u'CEDA_ECOLI_model1_clean_residues_removed_&_NOBFS_0']	80	0	1	1
CFA_ECOLI_model1_clean_residues_removed_&_NOBFS_0	ITASSER	{u'b1661': 1}	53.4105	{u'b1661': {u'X': [True, 53.4105]}}	[u'CFA_ECOLI_model1_clean_residues_removed_&_NOBFS_0']	382	1	1	1
CH10_ECOLI_model1_clean_residues_removed_&_NOBFS_0	ITASSER	{u'b4142': 1}	98.3	{u'b4142': {u'X': [True, 98.3]}}	[u'CH10_ECOLI_model1_clean_residues_removed_&_NOBFS_0']	97	1	1	1
CH60_ECOLI_model1_clean_residues_removed_&_NOBFS_0	ITASSER	{u'b4143': 1}	97.5	{u'b4143': {u'X': [True, 97.5]}}	[u'CH60_ECOLI_model1_clean_residues_removed_&_NOBFS_0']	548	1	1	1
CHAA_ECOLI_model1_clean_residues_removed_&_NOBFS_0	ITASSER	{u'b1216': 1}	41.4	{u'b1216': {u'X': [False, 41.4]}}	[u'CHAA_ECOLI_model1_clean_residues_removed_&_NOBFS_0']	366	0	1	1
CHAB_ECOLI_model1_clean_residues_removed_&_NOBFS_0	ITASSER	{u'b1217': 1}	98.2	{u'b1217': {u'X': [True, 98.2]}}	[u'CHAB_ECOLI_model1_clean_residues_removed_&_NOBFS_0']	76	1	1	1
CHAC_ECOLI_model1_clean_residues_removed_&_NOBFS_0	ITASSER	{u'b1218': 1}	45.4072	{u'b1218': {u'X': [False, 45.407199999999996]}}	[u'CHAC_ECOLI_model1_clean_residues_removed_&_NOBFS_0']	231	0	1	1
CHBF_ECOLI_model1_clean_residues_removed_&_NOBFS_0	ITASSER	{u'b1734': 1}	94.9	{u'b1734': {u'X': [True, 94.9]}}	[u'CHBF_ECOLI_model1_clean_residues_removed_&_NOBFS_0']	450	1	1	1
CHBG_ECOLI_model1_clean_residues_removed_&_NOBFS_0	ITASSER	{u'b1733': 1}	95.6	{u'b1733': {u'X': [True, 95.6]}}	[u'CHBG_ECOLI_model1_clean_residues_removed_&_NOBFS_0']	249	1	1	1
CHBR_ECOLI_model1_clean_residues_removed_&_NOBFS_0	ITASSER	{u'b1735': 1}	46.8993	{u'b1735': {u'X': [False, 46.8993]}}	[u'CHBR_ECOLI_model1_clean_residues_removed_&_NOBFS_0']	280	0	1	1
CHEA_ECOLI_model1_clean_residues_removed_&_NOBFS_0	ITASSER	{u'b1888': 1}	46.9558	{u'b1888': {u'X': [False, 46.95579999999999]}}	[u'CHEA_ECOLI_model1_clean_residues_removed_&_NOBFS_0']	654	0	1	1
CHEB_ECOLI_model1_clean_residues_removed_&_NOBFS_0	ITASSER	{u'b1883': 1}	99.7	{u'b1883': {u'X': [True, 99.7]}}	[u'CHEB_ECOLI_model1_clean_residues_removed_&_NOBFS_0']	349	1	1	1
CHER_ECOLI_model1_clean_residues_removed_&_NOBFS_0	ITASSER	{u'b1884': 1}	97.3	{u'b1884': {u'X': [True, 97.3]}}	[u'CHER_ECOLI_model1_clean_residues_removed_&_NOBFS_0']	286	1	1	1
CHEW_ECOLI_model1_clean_residues_removed_&_NOBFS_0	ITASSER	{u'b1887': 1}	70.4	{u'b1887': {u'X': [True, 70.4]}}	[u'CHEW_ECOLI_model1_clean_residues_removed_&_NOBFS_0']	167	1	1	1
CHEY_ECOLI_model1_clean_residues_removed_&_NOBFS_0	ITASSER	{u'b1882': 1}	99.4	{u'b1882': {u'X': [True, 99.4]}}	[u'CHEY_ECOLI_model1_clean_residues_removed_&_NOBFS_0']	129	1	1	1
CHEZ_ECOLI_model1_clean_residues_removed_&_NOBFS_0	ITASSER	{u'b1881': 1}	70.5	{u'b1881': {u'X': [True, 70.5]}}	[u'CHEZ_ECOLI_model1_clean_residues_removed_&_NOBFS_0']	214	1	1	1
CHIA_ECOLI_model1_clean_residues_removed_&_NOBFS_0	ITASSER	{u'b3338': 1}	50.9	{u'b3338': {u'X': [True, 50.9]}}	[u'CHIA_ECOLI_model1_clean_residues_removed_&_NOBFS_0']	897	1	1	1
CHO_ECOLI_model1_clean_residues_removed_&_NOBFS_0	ITASSER	{u'b1741': 1}	41.9	{u'b1741': {u'X': [False, 41.9]}}	[u'CHO_ECOLI_model1_clean_residues_removed_&_NOBFS_0']	295	0	1	1
CHPB_ECOLI_model1_clean_residues_removed_&_NOBFS_0	ITASSER	{u'b4225': 1}	96	{u'b4225': {u'X': [True, 96.0]}}	[u'CHPB_ECOLI_model1_clean_residues_removed_&_NOBFS_0']	116	1	1	1
CHPS_ECOLI_model1_clean_residues_removed_&_NOBFS_0	ITASSER	{u'b4224': 1}	59.6	{u'b4224': {u'X': [True, 59.599999999999994]}}	[u'CHPS_ECOLI_model1_clean_residues_removed_&_NOBFS_0']	83	1	1	1
CILA_ECOLI_model1_clean_residues_removed_&_NOBFS_0	ITASSER	{u'b0615': 1}	96.6	{u'b0615': {u'X': [True, 96.6]}}	[u'CILA_ECOLI_model1_clean_residues_removed_&_NOBFS_0']	510	1	1	1
CINAL_ECOLI_model1_clean_residues_removed_&_NOBFS_0	ITASSER	{u'b2249': 1}	25.065	{u'b2249': {u'X': [False, 25.065]}}	[u'CINAL_ECOLI_model1_clean_residues_removed_&_NOBFS_0']	400	0	1	1
CIRA_ECOLI_model1_clean_residues_removed_&_NOBFS_0	ITASSER	{u'b2155': 1}	81.0975	{u'b2155': {u'X': [True, 81.0975]}}	[u'CIRA_ECOLI_model1_clean_residues_removed_&_NOBFS_0']	663	1	1	1
CISY_ECOLI_model1_clean_residues_removed_&_NOBFS_0	ITASSER	{u'b0720': 1}	98.1	{u'b0720': {u'X': [True, 98.1]}}	[u'CISY_ECOLI_model1_clean_residues_removed_&_NOBFS_0']	427	1	1	1
CITC_ECOLI_model1_clean_residues_removed_&_NOBFS_0	ITASSER	{u'b0618': 1}	59.7	{u'b0618': {u'X': [True, 59.699999999999996]}}	[u'CITC_ECOLI_model1_clean_residues_removed_&_NOBFS_0']	352	1	1	1
CITD_ECOLI_model1_clean_residues_removed_&_NOBFS_0	ITASSER	{u'b0617': 1}	54.1	{u'b0617': {u'X': [True, 54.1]}}	[u'CITD_ECOLI_model1_clean_residues_removed_&_NOBFS_0']	98	1	1	1
CITE_ECOLI_model1_clean_residues_removed_&_NOBFS_0	ITASSER	{u'b0616': 1}	77.4	{u'b0616': {u'X': [True, 77.4]}}	[u'CITE_ECOLI_model1_clean_residues_removed_&_NOBFS_0']	302	1	1	1
CITG_ECOLI_model1_clean_residues_removed_&_NOBFS_0	ITASSER	{u'b0613': 1}	34.83	{u'b0613': {u'X': [False, 34.830000000000005]}}	[u'CITG_ECOLI_model1_clean_residues_removed_&_NOBFS_0']	292	0	1	1
CITT_ECOLI_model1_clean_residues_removed_&_NOBFS_0	ITASSER	{u'b0612': 1}	55.2	{u'b0612': {u'X': [True, 55.2]}}	[u'CITT_ECOLI_model1_clean_residues_removed_&_NOBFS_0']	487	1	1	1
CITX_ECOLI_model1_clean_residues_removed_&_NOBFS_0	ITASSER	{u'b0614': 1}	45.6	{u'b0614': {u'X': [False, 45.6]}}	[u'CITX_ECOLI_model1_clean_residues_removed_&_NOBFS_0']	183	0	1	1
CLCA_ECOLI_model1_clean_residues_removed_&_NOBFS_0	ITASSER	{u'b0155': 1}	95.3532	{u'b0155': {u'X': [True, 95.35319999999999]}}	[u'CLCA_ECOLI_model1_clean_residues_removed_&_NOBFS_0']	473	1	1	1
CLCB_ECOLI_model1_clean_residues_removed_&_NOBFS_0	ITASSER	{u'b1592': 1}	90.5	{u'b1592': {u'X': [True, 90.5]}}	[u'CLCB_ECOLI_model1_clean_residues_removed_&_NOBFS_0']	418	1	1	1
CLPA_ECOLI_model1_clean_residues_removed_&_NOBFS_0	ITASSER	{u'b0882': 1}	92.8	{u'b0882': {u'X': [True, 92.8]}}	[u'CLPA_ECOLI_model1_clean_residues_removed_&_NOBFS_0']	758	1	1	1
CLPB_ECOLI_model1_clean_residues_removed_&_NOBFS_0	ITASSER	{u'b2592': 1}	93.6	{u'b2592': {u'X': [True, 93.6]}}	[u'CLPB_ECOLI_model1_clean_residues_removed_&_NOBFS_0']	857	1	1	1
CLPP_ECOLI_model1_clean_residues_removed_&_NOBFS_0	ITASSER	{u'b0437': 1}	94.941	{u'b0437': {u'X': [True, 94.941]}}	[u'CLPP_ECOLI_model1_clean_residues_removed_&_NOBFS_0']	207	1	1	1
CLPS_ECOLI_model1_clean_residues_removed_&_NOBFS_0	ITASSER	{u'b0881': 1}	62.1	{u'b0881': {u'X': [True, 62.1]}}	[u'CLPS_ECOLI_model1_clean_residues_removed_&_NOBFS_0']	106	1	1	1
CLPX_ECOLI_model1_clean_residues_removed_&_NOBFS_0	ITASSER	{u'b0438': 1}	64.9977	{u'b0438': {u'X': [True, 64.99770000000001]}}	[u'CLPX_ECOLI_model1_clean_residues_removed_&_NOBFS_0']	424	1	1	1
CLS_ECOLI_model1_clean_residues_removed_&_NOBFS_0	ITASSER	{u'b1249': 1}	48.8566	{u'b1249': {u'X': [False, 48.8566]}}	[u'CLS_ECOLI_model1_clean_residues_removed_&_NOBFS_0']	486	0	1	1
CMOA_ECOLI_model1_clean_residues_removed_&_NOBFS_0	ITASSER	{u'b1870': 1}	93.9	{u'b1870': {u'X': [True, 93.9]}}	[u'CMOA_ECOLI_model1_clean_residues_removed_&_NOBFS_0']	247	1	1	1
CMOB_ECOLI_model1_clean_residues_removed_&_NOBFS_0	ITASSER	{u'b1871': 1}	43.6035	{u'b1871': {u'X': [False, 43.603500000000004]}}	[u'CMOB_ECOLI_model1_clean_residues_removed_&_NOBFS_0']	323	0	1	1
CNU_ECOLI_model1_clean_residues_removed_&_NOBFS_0	ITASSER	{u'b1625': 1}	89.7	{u'b1625': {u'X': [True, 89.7]}}	[u'CNU_ECOLI_model1_clean_residues_removed_&_NOBFS_0']	71	1	1	1
COAA_ECOLI_model1_clean_residues_removed_&_NOBFS_0	ITASSER	{u'b3974': 1}	90.5	{u'b3974': {u'X': [True, 90.5]}}	[u'COAA_ECOLI_model1_clean_residues_removed_&_NOBFS_0']	316	1	1	1
COABC_ECOLI_model1_clean_residues_removed_&_NOBFS_0	ITASSER	{u'b3639': 1}	43.2054	{u'b3639': {u'X': [False, 43.205400000000004]}}	[u'COABC_ECOLI_model1_clean_residues_removed_&_NOBFS_0']	406	0	1	1
COAD_ECOLI_model1_clean_residues_removed_&_NOBFS_0	ITASSER	{u'b3634': 1}	90.9	{u'b3634': {u'X': [True, 90.9]}}	[u'COAD_ECOLI_model1_clean_residues_removed_&_NOBFS_0']	159	1	1	1
COAE_ECOLI_model1_clean_residues_removed_&_NOBFS_0	ITASSER	{u'b0103': 1}	99.4	{u'b0103': {u'X': [True, 99.4]}}	[u'COAE_ECOLI_model1_clean_residues_removed_&_NOBFS_0']	206	1	1	1
COBC_ECOLI_model1_clean_residues_removed_&_NOBFS_0	ITASSER	{u'b0638': 1}	98.4	{u'b0638': {u'X': [True, 98.4]}}	[u'COBC_ECOLI_model1_clean_residues_removed_&_NOBFS_0']	203	1	1	1
COBS_ECOLI_model1_clean_residues_removed_&_NOBFS_0	ITASSER	{u'b1992': 1}	39.6	{u'b1992': {u'X': [False, 39.6]}}	[u'COBS_ECOLI_model1_clean_residues_removed_&_NOBFS_0']	247	0	1	1
COBT_ECOLI_model1_clean_residues_removed_&_NOBFS_0	ITASSER	{u'b1991': 1}	98.1	{u'b1991': {u'X': [True, 98.1]}}	[u'COBT_ECOLI_model1_clean_residues_removed_&_NOBFS_0']	359	1	1	1
COBU_ECOLI_model1_clean_residues_removed_&_NOBFS_0	ITASSER	{u'b1993': 1}	99.6	{u'b1993': {u'X': [True, 99.6]}}	[u'COBU_ECOLI_model1_clean_residues_removed_&_NOBFS_0']	181	1	1	1
CODA_ECOLI_model1_clean_residues_removed_&_NOBFS_0	ITASSER	{u'b0337': 1}	79	{u'b0337': {u'X': [True, 79.0]}}	[u'CODA_ECOLI_model1_clean_residues_removed_&_NOBFS_0']	427	1	1	1
CODB_ECOLI_model1_clean_residues_removed_&_NOBFS_0	ITASSER	{u'b0336': 1}	64.9	{u'b0336': {u'X': [True, 64.9]}}	[u'CODB_ECOLI_model1_clean_residues_removed_&_NOBFS_0']	419	1	1	1
COF_ECOLI_model1_clean_residues_removed_&_NOBFS_0	ITASSER	{u'b0446': 1}	97.2	{u'b0446': {u'X': [True, 97.2]}}	[u'COF_ECOLI_model1_clean_residues_removed_&_NOBFS_0']	272	1	1	1
COHE_ECOLI_model1_clean_residues_removed_&_NOBFS_0	ITASSER	{u'b1145': 1}	58.7	{u'b1145': {u'X': [True, 58.70000000000001]}}	[u'COHE_ECOLI_model1_clean_residues_removed_&_NOBFS_0']	224	1	1	1
COPA_ECOLI_model1_clean_residues_removed_&_NOBFS_0	ITASSER	{u'b0484': 1}	37.8182	{u'b0484': {u'X': [False, 37.8182]}}	[u'COPA_ECOLI_model1_clean_residues_removed_&_NOBFS_0']	834	0	1	1
CORA_ECOLI_model1_clean_residues_removed_&_NOBFS_0	ITASSER	{u'b3816': 1}	87.1	{u'b3816': {u'X': [True, 87.1]}}	[u'CORA_ECOLI_model1_clean_residues_removed_&_NOBFS_0']	316	1	1	1
CORC_ECOLI_model1_clean_residues_removed_&_NOBFS_0	ITASSER	{u'b0658': 1}	40.454	{u'b0658': {u'X': [False, 40.45399999999999]}}	[u'CORC_ECOLI_model1_clean_residues_removed_&_NOBFS_0']	292	0	1	1
CPDA_ECOLI_model1_clean_residues_removed_&_NOBFS_0	ITASSER	{u'b3032': 1}	83.7	{u'b3032': {u'X': [True, 83.7]}}	[u'CPDA_ECOLI_model1_clean_residues_removed_&_NOBFS_0']	275	1	1	1
CPDB_ECOLI_model1_clean_residues_removed_&_NOBFS_0	ITASSER	{u'b4213': 1}	63.784	{u'b4213': {u'X': [True, 63.784000000000006]}}	[u'CPDB_ECOLI_model1_clean_residues_removed_&_NOBFS_0']	647	1	1	1
CPTA_ECOLI_model1_clean_residues_removed_&_NOBFS_0	ITASSER	{u'b3955': 1}	35.3808	{u'b3955': {u'X': [False, 35.3808]}}	[u'CPTA_ECOLI_model1_clean_residues_removed_&_NOBFS_0']	577	0	1	1
CPXA_ECOLI_model1_clean_residues_removed_&_NOBFS_0	ITASSER	{u'b3911': 1}	52.143	{u'b3911': {u'X': [True, 52.142999999999994]}}	[u'CPXA_ECOLI_model1_clean_residues_removed_&_NOBFS_0']	457	1	1	1
CPXP_ECOLI_model1_clean_residues_removed_&_NOBFS_0	ITASSER	{u'b4484': 1}	40.8	{u'b4484': {u'X': [False, 40.8]}}	[u'CPXP_ECOLI_model1_clean_residues_removed_&_NOBFS_0']	166	0	1	1
CPXR_ECOLI_model1_clean_residues_removed_&_NOBFS_0	ITASSER	{u'b3912': 1}	60	{u'b3912': {u'X': [True, 60.0]}}	[u'CPXR_ECOLI_model1_clean_residues_removed_&_NOBFS_0']	232	1	1	1
CRCB_ECOLI_model1_clean_residues_removed_&_NOBFS_0	ITASSER	{u'b0624': 1}	70.2	{u'b0624': {u'X': [True, 70.2]}}	[u'CRCB_ECOLI_model1_clean_residues_removed_&_NOBFS_0']	127	1	1	1
CREA_ECOLI_model1_clean_residues_removed_&_NOBFS_0	ITASSER	{u'b4397': 1}	40.5	{u'b4397': {u'X': [False, 40.5]}}	[u'CREA_ECOLI_model1_clean_residues_removed_&_NOBFS_0']	157	0	1	1
CREB_ECOLI_model1_clean_residues_removed_&_NOBFS_0	ITASSER	{u'b4398': 1}	60.3	{u'b4398': {u'X': [True, 60.3]}}	[u'CREB_ECOLI_model1_clean_residues_removed_&_NOBFS_0']	229	1	1	1
CREC_ECOLI_model1_clean_residues_removed_&_NOBFS_0	ITASSER	{u'b4399': 1}	55.9	{u'b4399': {u'X': [True, 55.89999999999999]}}	[u'CREC_ECOLI_model1_clean_residues_removed_&_NOBFS_0']	474	1	1	1
CRED_ECOLI_model1_clean_residues_removed_&_NOBFS_0	ITASSER	{u'b4400': 1}	78.8	{u'b4400': {u'X': [True, 78.8]}}	[u'CRED_ECOLI_model1_clean_residues_removed_&_NOBFS_0']	450	1	1	1
CRL_ECOLI_model1_clean_residues_removed_&_NOBFS_0	ITASSER	{u'b0240': 1}	51.2	{u'b0240': {u'X': [True, 51.2]}}	[u'CRL_ECOLI_model1_clean_residues_removed_&_NOBFS_0']	133	1	1	1
CROE_ECOLI_model1_clean_residues_removed_&_NOBFS_0	ITASSER	{u'b1146': 1}	67.6	{u'b1146': {u'X': [True, 67.6]}}	[u'CROE_ECOLI_model1_clean_residues_removed_&_NOBFS_0']	66	1	1	1
CRP_ECOLI_model1_clean_residues_removed_&_NOBFS_0	ITASSER	{u'b3357': 1}	77	{u'b3357': {u'X': [True, 77.0]}}	[u'CRP_ECOLI_model1_clean_residues_removed_&_NOBFS_0']	210	1	1	1
CSDA_ECOLI_model1_clean_residues_removed_&_NOBFS_0	ITASSER	{u'b2810': 1}	98.6	{u'b2810': {u'X': [True, 98.6]}}	[u'CSDA_ECOLI_model1_clean_residues_removed_&_NOBFS_0']	401	1	1	1
CSGA_ECOLI_model1_clean_residues_removed_&_NOBFS_0	ITASSER	{u'b1042': 1}	84.8	{u'b1042': {u'X': [True, 84.8]}}	[u'CSGA_ECOLI_model1_clean_residues_removed_&_NOBFS_0']	151	1	1	1
CSGB_ECOLI_model1_clean_residues_removed_&_NOBFS_0	ITASSER	{u'b1041': 1}	75.264	{u'b1041': {u'X': [True, 75.264]}}	[u'CSGB_ECOLI_model1_clean_residues_removed_&_NOBFS_0']	151	1	1	1
CSGC_ECOLI_model1_clean_residues_removed_&_NOBFS_0	ITASSER	{u'b1043': 1}	62.8	{u'b1043': {u'X': [True, 62.8]}}	[u'CSGC_ECOLI_model1_clean_residues_removed_&_NOBFS_0']	110	1	1	1
CSGD_ECOLI_model1_clean_residues_removed_&_NOBFS_0	ITASSER	{u'b1040': 1}	54.6	{u'b1040': {u'X': [True, 54.6]}}	[u'CSGD_ECOLI_model1_clean_residues_removed_&_NOBFS_0']	216	1	1	1
CSGF_ECOLI_model1_clean_residues_removed_&_NOBFS_0	ITASSER	{u'b1038': 1}	45.8	{u'b1038': {u'X': [False, 45.8]}}	[u'CSGF_ECOLI_model1_clean_residues_removed_&_NOBFS_0']	138	0	1	1
CSGG_ECOLI_model1_clean_residues_removed_&_NOBFS_0	ITASSER	{u'b1037': 1}	62.0832	{u'b1037': {u'X': [True, 62.0832]}}	[u'CSGG_ECOLI_model1_clean_residues_removed_&_NOBFS_0']	277	1	1	1
CSID_ECOLI_model1_clean_residues_removed_&_NOBFS_0	ITASSER	{u'b2659': 1}	96.3	{u'b2659': {u'X': [True, 96.3]}}	[u'CSID_ECOLI_model1_clean_residues_removed_&_NOBFS_0']	325	1	1	1
CSIE_ECOLI_model1_clean_residues_removed_&_NOBFS_0	ITASSER	{u'b2535': 1}	43.3	{u'b2535': {u'X': [False, 43.3]}}	[u'CSIE_ECOLI_model1_clean_residues_removed_&_NOBFS_0']	426	0	1	1
CSIR_ECOLI_model1_clean_residues_removed_&_NOBFS_0	ITASSER	{u'b2664': 1}	95.8	{u'b2664': {u'X': [True, 95.8]}}	[u'CSIR_ECOLI_model1_clean_residues_removed_&_NOBFS_0']	220	1	1	1
CSPA_ECOLI_model1_clean_residues_removed_&_NOBFS_0	ITASSER	{u'b3556': 1}	88.8	{u'b3556': {u'X': [True, 88.8]}}	[u'CSPA_ECOLI_model1_clean_residues_removed_&_NOBFS_0']	70	1	1	1
CSPB_ECOLI_model1_clean_residues_removed_&_NOBFS_0	ITASSER	{u'b1557': 1}	87.9	{u'b1557': {u'X': [True, 87.9]}}	[u'CSPB_ECOLI_model1_clean_residues_removed_&_NOBFS_0']	71	1	1	1
CSPC_ECOLI_model1_clean_residues_removed_&_NOBFS_0	ITASSER	{u'b1823': 1}	89.5	{u'b1823': {u'X': [True, 89.5]}}	[u'CSPC_ECOLI_model1_clean_residues_removed_&_NOBFS_0']	69	1	1	1
CSPD_ECOLI_model1_clean_residues_removed_&_NOBFS_0	ITASSER	{u'b0880': 1}	85.3	{u'b0880': {u'X': [True, 85.3]}}	[u'CSPD_ECOLI_model1_clean_residues_removed_&_NOBFS_0']	74	1	1	1
CSPE_ECOLI_model1_clean_residues_removed_&_NOBFS_0	ITASSER	{u'b0623': 1}	89.4	{u'b0623': {u'X': [True, 89.4]}}	[u'CSPE_ECOLI_model1_clean_residues_removed_&_NOBFS_0']	69	1	1	1
CSPF_ECOLI_model1_clean_residues_removed_&_NOBFS_0	ITASSER	{u'b1558': 1}	88.8	{u'b1558': {u'X': [True, 88.8]}}	[u'CSPF_ECOLI_model1_clean_residues_removed_&_NOBFS_0']	70	1	1	1
CSPG_ECOLI_model1_clean_residues_removed_&_NOBFS_0	ITASSER	{u'b0990': 1}	88.8	{u'b0990': {u'X': [True, 88.8]}}	[u'CSPG_ECOLI_model1_clean_residues_removed_&_NOBFS_0']	70	1	1	1
CSPH_ECOLI_model1_clean_residues_removed_&_NOBFS_0	ITASSER	{u'b0989': 1}	88.9	{u'b0989': {u'X': [True, 88.9]}}	[u'CSPH_ECOLI_model1_clean_residues_removed_&_NOBFS_0']	70	1	1	1
CSPI_ECOLI_model1_clean_residues_removed_&_NOBFS_0	ITASSER	{u'b1552': 1}	88.7	{u'b1552': {u'X': [True, 88.7]}}	[u'CSPI_ECOLI_model1_clean_residues_removed_&_NOBFS_0']	70	1	1	1
CSRA_ECOLI_model1_clean_residues_removed_&_NOBFS_0	ITASSER	{u'b2696': 1}	39.3	{u'b2696': {u'X': [False, 39.3]}}	[u'CSRA_ECOLI_model1_clean_residues_removed_&_NOBFS_0']	61	0	1	1
CSRD_ECOLI_model1_clean_residues_removed_&_NOBFS_0	ITASSER	{u'b3252': 1}	37.8775	{u'b3252': {u'X': [False, 37.877500000000005]}}	[u'CSRD_ECOLI_model1_clean_residues_removed_&_NOBFS_0']	646	0	1	1
CSTA_ECOLI_model1_clean_residues_removed_&_NOBFS_0	ITASSER	{u'b0598': 1}	81.2	{u'b0598': {u'X': [True, 81.2]}}	[u'CSTA_ECOLI_model1_clean_residues_removed_&_NOBFS_0']	701	1	1	1
CUEO_ECOLI_model1_clean_residues_removed_&_NOBFS_0	ITASSER	{u'b0123': 1}	92.6969	{u'b0123': {u'X': [True, 92.6969]}}	[u'CUEO_ECOLI_model1_clean_residues_removed_&_NOBFS_0']	516	1	1	1
CUER_ECOLI_model1_clean_residues_removed_&_NOBFS_0	ITASSER	{u'b0487': 1}	90.3	{u'b0487': {u'X': [True, 90.3]}}	[u'CUER_ECOLI_model1_clean_residues_removed_&_NOBFS_0']	135	1	1	1
CUSA_ECOLI_model1_clean_residues_removed_&_NOBFS_0	ITASSER	{u'b0575': 1}	41.3	{u'b0575': {u'X': [False, 41.3]}}	[u'CUSA_ECOLI_model1_clean_residues_removed_&_NOBFS_0']	1047	0	1	1
CUSB_ECOLI_model1_clean_residues_removed_&_NOBFS_0	ITASSER	{u'b0574': 1}	45.1122	{u'b0574': {u'X': [False, 45.1122]}}	[u'CUSB_ECOLI_model1_clean_residues_removed_&_NOBFS_0']	407	0	1	1
CUSC_ECOLI_model1_clean_residues_removed_&_NOBFS_0	ITASSER	{u'b0572': 1}	89.4	{u'b0572': {u'X': [True, 89.4]}}	[u'CUSC_ECOLI_model1_clean_residues_removed_&_NOBFS_0']	457	1	1	1
CUSF_ECOLI_model1_clean_residues_removed_&_NOBFS_0	ITASSER	{u'b0573': 1}	53.6	{u'b0573': {u'X': [True, 53.6]}}	[u'CUSF_ECOLI_model1_clean_residues_removed_&_NOBFS_0']	110	1	1	1
CUSR_ECOLI_model1_clean_residues_removed_&_NOBFS_0	ITASSER	{u'b0571': 1}	98	{u'b0571': {u'X': [True, 98.0]}}	[u'CUSR_ECOLI_model1_clean_residues_removed_&_NOBFS_0']	227	1	1	1
CUSS_ECOLI_model1_clean_residues_removed_&_NOBFS_0	ITASSER	{u'b0570': 1}	55.5	{u'b0570': {u'X': [True, 55.50000000000001]}}	[u'CUSS_ECOLI_model1_clean_residues_removed_&_NOBFS_0']	480	1	1	1
CUTA_ECOLI_model1_clean_residues_removed_&_NOBFS_0	ITASSER	{u'b4137': 1}	91.6	{u'b4137': {u'X': [True, 91.6]}}	[u'CUTA_ECOLI_model1_clean_residues_removed_&_NOBFS_0']	112	1	1	1
CUTC_ECOLI_model1_clean_residues_removed_&_NOBFS_0	ITASSER	{u'b1874': 1}	96.3	{u'b1874': {u'X': [True, 96.3]}}	[u'CUTC_ECOLI_model1_clean_residues_removed_&_NOBFS_0']	248	1	1	1
CVPA_ECOLI_model1_clean_residues_removed_&_NOBFS_0	ITASSER	{u'b2313': 1}	83.5	{u'b2313': {u'X': [True, 83.5]}}	[u'CVPA_ECOLI_model1_clean_residues_removed_&_NOBFS_0']	162	1	1	1
CYAA_ECOLI_model1_clean_residues_removed_&_NOBFS_0	ITASSER	{u'b3806': 1}	88.1	{u'b3806': {u'X': [True, 88.1]}}	[u'CYAA_ECOLI_model1_clean_residues_removed_&_NOBFS_0']	848	1	1	1
CYAY_ECOLI_model1_clean_residues_removed_&_NOBFS_0	ITASSER	{u'b3807': 1}	99.8	{u'b3807': {u'X': [True, 99.8]}}	[u'CYAY_ECOLI_model1_clean_residues_removed_&_NOBFS_0']	106	1	1	1
CYBH_ECOLI_model1_clean_residues_removed_&_NOBFS_0	ITASSER	{u'b0974': 1}	83.3	{u'b0974': {u'X': [True, 83.3]}}	[u'CYBH_ECOLI_model1_clean_residues_removed_&_NOBFS_0']	235	1	1	1
CYCA_ECOLI_model1_clean_residues_removed_&_NOBFS_0	ITASSER	{u'b4208': 1}	66.8	{u'b4208': {u'X': [True, 66.8]}}	[u'CYCA_ECOLI_model1_clean_residues_removed_&_NOBFS_0']	470	1	1	1
CYDA_ECOLI_model1_clean_residues_removed_&_NOBFS_0	ITASSER	{u'b0733': 1}	49.2544	{u'b0733': {u'X': [False, 49.254400000000004]}}	[u'CYDA_ECOLI_model1_clean_residues_removed_&_NOBFS_0']	522	0	1	1
CYDB_ECOLI_model1_clean_residues_removed_&_NOBFS_0	ITASSER	{u'b0734': 1}	88.5	{u'b0734': {u'X': [True, 88.5]}}	[u'CYDB_ECOLI_model1_clean_residues_removed_&_NOBFS_0']	379	1	1	1
CYDC_ECOLI_model1_clean_residues_removed_&_NOBFS_0	ITASSER	{u'b0886': 1}	96.1	{u'b0886': {u'X': [True, 96.1]}}	[u'CYDC_ECOLI_model1_clean_residues_removed_&_NOBFS_0']	573	1	1	1
CYDD_ECOLI_model1_clean_residues_removed_&_NOBFS_0	ITASSER	{u'b0887': 1}	96.2	{u'b0887': {u'X': [True, 96.2]}}	[u'CYDD_ECOLI_model1_clean_residues_removed_&_NOBFS_0']	588	1	1	1
CYNR_ECOLI_model1_clean_residues_removed_&_NOBFS_0	ITASSER	{u'b0338': 1}	92.1	{u'b0338': {u'X': [True, 92.1]}}	[u'CYNR_ECOLI_model1_clean_residues_removed_&_NOBFS_0']	299	1	1	1
CYNS_ECOLI_model1_clean_residues_removed_&_NOBFS_0	ITASSER	{u'b0340': 1}	97.6	{u'b0340': {u'X': [True, 97.6]}}	[u'CYNS_ECOLI_model1_clean_residues_removed_&_NOBFS_0']	156	1	1	1
CYNT_ECOLI_model1_clean_residues_removed_&_NOBFS_0	ITASSER	{u'b0339': 1}	87.9	{u'b0339': {u'X': [True, 87.9]}}	[u'CYNT_ECOLI_model1_clean_residues_removed_&_NOBFS_0']	219	1	1	1
CYNX_ECOLI_model1_clean_residues_removed_&_NOBFS_0	ITASSER	{u'b0341': 1}	88.3	{u'b0341': {u'X': [True, 88.3]}}	[u'CYNX_ECOLI_model1_clean_residues_removed_&_NOBFS_0']	384	1	1	1
CYOA_ECOLI_model1_clean_residues_removed_&_NOBFS_0	ITASSER	{u'b0432': 1}	79.1	{u'b0432': {u'X': [True, 79.1]}}	[u'CYOA_ECOLI_model1_clean_residues_removed_&_NOBFS_0']	315	1	1	1
CYOB_ECOLI_model1_clean_residues_removed_&_NOBFS_0	ITASSER	{u'b0431': 1}	70.5985	{u'b0431': {u'X': [True, 70.5985]}}	[u'CYOB_ECOLI_model1_clean_residues_removed_&_NOBFS_0']	663	1	1	1
CYOC_ECOLI_model1_clean_residues_removed_&_NOBFS_0	ITASSER	{u'b0430': 1}	94.6	{u'b0430': {u'X': [True, 94.6]}}	[u'CYOC_ECOLI_model1_clean_residues_removed_&_NOBFS_0']	204	1	1	1
CYOD_ECOLI_model1_clean_residues_removed_&_NOBFS_0	ITASSER	{u'b0429': 1}	54.3	{u'b0429': {u'X': [True, 54.29999999999999]}}	[u'CYOD_ECOLI_model1_clean_residues_removed_&_NOBFS_0']	109	1	1	1
CYOE_ECOLI_model1_clean_residues_removed_&_NOBFS_0	ITASSER	{u'b0428': 1}	42.7	{u'b0428': {u'X': [False, 42.70000000000001]}}	[u'CYOE_ECOLI_model1_clean_residues_removed_&_NOBFS_0']	296	0	1	1
CYSA_ECOLI_model1_clean_residues_removed_&_NOBFS_0	ITASSER	{u'b2422': 1}	81	{u'b2422': {u'X': [True, 81.0]}}	[u'CYSA_ECOLI_model1_clean_residues_removed_&_NOBFS_0']	365	1	1	1
CYSB_ECOLI_model1_clean_residues_removed_&_NOBFS_0	ITASSER	{u'b1275': 1}	66.1	{u'b1275': {u'X': [True, 66.1]}}	[u'CYSB_ECOLI_model1_clean_residues_removed_&_NOBFS_0']	324	1	1	1
CYSC_ECOLI_model1_clean_residues_removed_&_NOBFS_0	ITASSER	{u'b2750': 1}	94.3	{u'b2750': {u'X': [True, 94.3]}}	[u'CYSC_ECOLI_model1_clean_residues_removed_&_NOBFS_0']	201	1	1	1
CYSD_ECOLI_model1_clean_residues_removed_&_NOBFS_0	ITASSER	{u'b2752': 1}	58.7805	{u'b2752': {u'X': [True, 58.7805]}}	[u'CYSD_ECOLI_model1_clean_residues_removed_&_NOBFS_0']	302	1	1	1
CYSE_ECOLI_model1_clean_residues_removed_&_NOBFS_0	ITASSER	{u'b3607': 1}	54.7	{u'b3607': {u'X': [True, 54.7]}}	[u'CYSE_ECOLI_model1_clean_residues_removed_&_NOBFS_0']	273	1	1	1
CYSG_ECOLI_model1_clean_residues_removed_&_NOBFS_0	ITASSER	{u'b3368': 1}	93.1	{u'b3368': {u'X': [True, 93.1]}}	[u'CYSG_ECOLI_model1_clean_residues_removed_&_NOBFS_0']	457	1	1	1
CYSH_ECOLI_model1_clean_residues_removed_&_NOBFS_0	ITASSER	{u'b2762': 1}	65.7	{u'b2762': {u'X': [True, 65.7]}}	[u'CYSH_ECOLI_model1_clean_residues_removed_&_NOBFS_0']	244	1	1	1
CYSI_ECOLI_model1_clean_residues_removed_&_NOBFS_0	ITASSER	{u'b2763': 1}	80.7976	{u'b2763': {u'X': [True, 80.7976]}}	[u'CYSI_ECOLI_model1_clean_residues_removed_&_NOBFS_0']	570	1	1	1
CYSJ_ECOLI_model1_clean_residues_removed_&_NOBFS_0	ITASSER	{u'b2764': 1}	74.466	{u'b2764': {u'X': [True, 74.466]}}	[u'CYSJ_ECOLI_model1_clean_residues_removed_&_NOBFS_0']	599	1	1	1
CYSK_ECOLI_model1_clean_residues_removed_&_NOBFS_0	ITASSER	{u'b2414': 1}	99.6	{u'b2414': {u'X': [True, 99.6]}}	[u'CYSK_ECOLI_model1_clean_residues_removed_&_NOBFS_0']	323	1	1	1
CYSM_ECOLI_model1_clean_residues_removed_&_NOBFS_0	ITASSER	{u'b2421': 1}	98.2	{u'b2421': {u'X': [True, 98.2]}}	[u'CYSM_ECOLI_model1_clean_residues_removed_&_NOBFS_0']	303	1	1	1
CYSN_ECOLI_model1_clean_residues_removed_&_NOBFS_0	ITASSER	{u'b2751': 1}	84.9355	{u'b2751': {u'X': [True, 84.9355]}}	[u'CYSN_ECOLI_model1_clean_residues_removed_&_NOBFS_0']	475	1	1	1
CYSQ_ECOLI_model1_clean_residues_removed_&_NOBFS_0	ITASSER	{u'b4214': 1}	86.7	{u'b4214': {u'X': [True, 86.7]}}	[u'CYSQ_ECOLI_model1_clean_residues_removed_&_NOBFS_0']	246	1	1	1
CYST_ECOLI_model1_clean_residues_removed_&_NOBFS_0	ITASSER	{u'b2424': 1}	92.1	{u'b2424': {u'X': [True, 92.1]}}	[u'CYST_ECOLI_model1_clean_residues_removed_&_NOBFS_0']	277	1	1	1
CYSW_ECOLI_model1_clean_residues_removed_&_NOBFS_0	ITASSER	{u'b2423': 1}	86.7	{u'b2423': {u'X': [True, 86.7]}}	[u'CYSW_ECOLI_model1_clean_residues_removed_&_NOBFS_0']	291	1	1	1
CYSZ_ECOLI_model1_clean_residues_removed_&_NOBFS_0	ITASSER	{u'b2413': 1}	42.9	{u'b2413': {u'X': [False, 42.9]}}	[u'CYSZ_ECOLI_model1_clean_residues_removed_&_NOBFS_0']	253	0	1	1
CYTR_ECOLI_model1_clean_residues_removed_&_NOBFS_0	ITASSER	{u'b3934': 1}	94.6	{u'b3934': {u'X': [True, 94.6]}}	[u'CYTR_ECOLI_model1_clean_residues_removed_&_NOBFS_0']	341	1	1	1
DACA_ECOLI_model1_clean_residues_removed_&_NOBFS_0	ITASSER	{u'b0632': 1}	89.579	{u'b0632': {u'X': [True, 89.579]}}	[u'DACA_ECOLI_model1_clean_residues_removed_&_NOBFS_0']	403	1	1	1
DACB_ECOLI_model1_clean_residues_removed_&_NOBFS_0	ITASSER	{u'b3182': 1}	97.6	{u'b3182': {u'X': [True, 97.6]}}	[u'DACB_ECOLI_model1_clean_residues_removed_&_NOBFS_0']	477	1	1	1
DACC_ECOLI_model1_clean_residues_removed_&_NOBFS_0	ITASSER	{u'b0839': 1}	83.7535	{u'b0839': {u'X': [True, 83.7535]}}	[u'DACC_ECOLI_model1_clean_residues_removed_&_NOBFS_0']	400	1	1	1
DACD_ECOLI_model1_clean_residues_removed_&_NOBFS_0	ITASSER	{u'b2010': 1}	95.2	{u'b2010': {u'X': [True, 95.2]}}	[u'DACD_ECOLI_model1_clean_residues_removed_&_NOBFS_0']	388	1	1	1
DADA_ECOLI_model1_clean_residues_removed_&_NOBFS_0	ITASSER	{u'b1189': 1}	80.5	{u'b1189': {u'X': [True, 80.5]}}	[u'DADA_ECOLI_model1_clean_residues_removed_&_NOBFS_0']	432	1	1	1
DAMX_ECOLI_model1_clean_residues_removed_&_NOBFS_0	ITASSER	{u'b3388': 1}	42.4	{u'b3388': {u'X': [False, 42.4]}}	[u'DAMX_ECOLI_model1_clean_residues_removed_&_NOBFS_0']	428	0	1	1
DAPA_ECOLI_model1_clean_residues_removed_&_NOBFS_0	ITASSER	{u'b2478': 1}	96.8	{u'b2478': {u'X': [True, 96.8]}}	[u'DAPA_ECOLI_model1_clean_residues_removed_&_NOBFS_0']	292	1	1	1
DAPB_ECOLI_model1_clean_residues_removed_&_NOBFS_0	ITASSER	{u'b0031': 1}	99.4	{u'b0031': {u'X': [True, 99.4]}}	[u'DAPB_ECOLI_model1_clean_residues_removed_&_NOBFS_0']	273	1	1	1
DAPD_ECOLI_model1_clean_residues_removed_&_NOBFS_0	ITASSER	{u'b0166': 1}	99.8	{u'b0166': {u'X': [True, 99.8]}}	[u'DAPD_ECOLI_model1_clean_residues_removed_&_NOBFS_0']	274	1	1	1
DAPE_ECOLI_model1_clean_residues_removed_&_NOBFS_0	ITASSER	{u'b2472': 1}	82.5	{u'b2472': {u'X': [True, 82.5]}}	[u'DAPE_ECOLI_model1_clean_residues_removed_&_NOBFS_0']	375	1	1	1
DAPF_ECOLI_model1_clean_residues_removed_&_NOBFS_0	ITASSER	{u'b3809': 1}	100	{u'b3809': {u'X': [True, 100.0]}}	[u'DAPF_ECOLI_model1_clean_residues_removed_&_NOBFS_0']	274	1	1	1
DBHA_ECOLI_model1_clean_residues_removed_&_NOBFS_0	ITASSER	{u'b4000': 1}	79.8	{u'b4000': {u'X': [True, 79.8]}}	[u'DBHA_ECOLI_model1_clean_residues_removed_&_NOBFS_0']	90	1	1	1
DBHB_ECOLI_model1_clean_residues_removed_&_NOBFS_0	ITASSER	{u'b0440': 1}	84.1	{u'b0440': {u'X': [True, 84.1]}}	[u'DBHB_ECOLI_model1_clean_residues_removed_&_NOBFS_0']	90	1	1	1
DBPA_ECOLI_model1_clean_residues_removed_&_NOBFS_0	ITASSER	{u'b1343': 1}	75.036	{u'b1343': {u'X': [True, 75.036]}}	[u'DBPA_ECOLI_model1_clean_residues_removed_&_NOBFS_0']	457	1	1	1
DCDA_ECOLI_model1_clean_residues_removed_&_NOBFS_0	ITASSER	{u'b2838': 1}	99.4	{u'b2838': {u'X': [True, 99.4]}}	[u'DCDA_ECOLI_model1_clean_residues_removed_&_NOBFS_0']	420	1	1	1
DCD_ECOLI_model1_clean_residues_removed_&_NOBFS_0	ITASSER	{u'b2065': 1}	99.8	{u'b2065': {u'X': [True, 99.8]}}	[u'DCD_ECOLI_model1_clean_residues_removed_&_NOBFS_0']	193	1	1	1
[truncated: 3,689 more rows]

## Sheet: 001F-bestSWISS
	stype	gene_stoichiometry	total_quality	pdb_quality	identical_structures	AA_length	percent_true	quality_rank	percent_true_rank
[truncated: 4,049 more rows]

## Sheet: 002D-bestPDB
	stype	gene_stoichiometry	pdb_quality	identical_structures	AA_length	total_quality	percent_true	quality_rank	percent_true_rank	pdb_entry	pdb_quality_needle
[truncated: 117,697 more rows]

[truncated: 1 more sheets: 003D-bestAlphaMultimer]
