# Supplementary material for: Establishing comprehensive quaternary structural proteomes from genome sequence
Source: Research Square preprint supplement (doi:10.21203/rs.3.rs-2923626/v1), 2023-05-19
Supplement: Supplementary file 5 [file f4e146e2411d71b48c56f6c0.xlsx]

## Sheet: Description
	Dataset S4
	This dataset contains a grouping of all the annotated functional regions of the E. coli proteome. This data is drawn from Dataset S1 and is used to generate Fig. S4. The dataframe is organized alphabetically by functional category (e.g. ‘ACT_SITE’) and then by size (in terms of amino acids) of the subcategory (e.g. ‘nucleophile’ - 957 AAs). The number of sub-subcategories and the description of t…

## Sheet: DatasetS4-SuppData_007A_functio
Index	Category	SubCategories	SubCategory	Category2_num_AAs	SubCategoryDetails
0	ACT_SITE	121	nucleophile	957	[u'[\'/note="proton acceptor" hamap-rule:mf_00124"\']', u'[\'/note="proton acceptor"\']', u'[\'/note="nucleophile"\']', u'[\'/note="nucleophile" hamap-rule:mf_01022"\']', u'[\'/note="nucleophile" hamap-rule:mf_01050,\']', u'[\'/note="proton acceptor" prosite-prorule:pru10001"\']', u'[\'/note="nucleophile" prosite-prorule:pru00605"\']', u'[\'/note="nucleophile" prosite-prorule:pru00605"\', \'prosi…
1	ACT_SITE	66	electrophile	633	[u'[\'/note="proton donor"\']', u'[\'/note="proton donor" hamap-rule:mf_01022"\']', u'[\'/note="proton donor" hamap-rule:mf_02225,\']', u'[\'/note="proton donor; for a subset of substrates"\']', u'[\'hamap-rule:mf_00997"\', \'/note="proton donor" hamap-rule:mf_00997"\']', u'[\'/note="proton donor" hamap-rule:mf_00997"\']', u'[\'/note="proton donor" hamap-rule:mf_00318,\']', u'[\'/note="proton don…
2	ACT_SITE	1	unknown	606	[u"['unknown']"]
3	ACT_SITE	8	charge relay system	191	[u'[\'/note="charge relay system" hamap-rule:mf_00627"\']', u'[\'/note="charge relay system"\']', u'[\'/note="charge relay system; for autoendoproteolytic cleavage activity" rule:mf_00662"\']', u'[\'/note="schiff-base intermediate with substrate; via pyruvic acid; for decarboxylase activity" hamap-rule:mf_00662,\', \'/note="charge relay system; for autoendoproteolytic cleavage activity" rule:mf_0…
4	ACT_SITE	10	schiff-base	113	[u'[\'/note="schiff-base intermediate with substrate"\']', u'[\'/note="schiff-base intermediate with dxp"\']', u'[\'/note="schiff-base intermediate with substrate; via pyruvic acid"\']', u'[\'/note="schiff-base intermediate with dihydroxyacetone-p"\']', u'[\'/note="schiff-base intermediate with substrate; via pyruvic acid; for decarboxylase activity" hamap-rule:mf_00662,\', \'/note="charge relay …
5	ACT_SITE	29	histidine intermediate	90	[u'[\'/note="phosphohistidine intermediate" hamap-rule:mf_00347,\']', u'[\'/note="tele-phosphohistidine intermediate"\']', u'[\'/note="pros-phosphohistidine intermediate" rule:mf_00451"\']', u'[\'/note="tele-hemiaminal-histidine intermediate" prosite-prorule:pru00814,\']', u'[\'/note="tele-phosphohistidine intermediate" prosite-prorule:pru00419,\']', u'[\'/note="pros-phosphohistidine intermediate…
6	ACT_SITE	28	phosphohistidine intermediate	88	[u'[\'/note="phosphohistidine intermediate" hamap-rule:mf_00347,\']', u'[\'/note="tele-phosphohistidine intermediate"\']', u'[\'/note="pros-phosphohistidine intermediate" rule:mf_00451"\']', u'[\'/note="tele-phosphohistidine intermediate" prosite-prorule:pru00419,\']', u'[\'/note="pros-phosphohistidine intermediate" prosite-prorule:pru00419,\']', u'[\'/note="tele-phosphohistidine intermediate" pr…
7	ACT_SITE	7	dna-tyrosine intermediate	84	[u'[\'prosite-prorule:pru01246"\', \'/note="o-(3\\\'-phospho-dna)-tyrosine intermediate" prosite-prorule:pru01246"\']', u'[\'/note="o-(3\\\'-phospho-dna)-tyrosine intermediate" prosite-prorule:pru01246"\']', u'[\'/note="o-(3\\\'-phospho-dna)-tyrosine intermediate" prosite-prorule:pru01246"\', \'prosite-prorule:pru01246"\']', u'[\'/note="o-(5\\\'-phospho-dna)-tyrosine intermediate" hamap-rule:mf_0…
8	ACT_SITE	3	tyrosine recombinase domain	76	[u'[\'prosite-prorule:pru01246"\', \'/note="o-(3\\\'-phospho-dna)-tyrosine intermediate" prosite-prorule:pru01246"\']', u'[\'/note="o-(3\\\'-phospho-dna)-tyrosine intermediate" prosite-prorule:pru01246"\']', u'[\'/note="o-(3\\\'-phospho-dna)-tyrosine intermediate" prosite-prorule:pru01246"\', \'prosite-prorule:pru01246"\']']
9	ACT_SITE	9	cysteine intermediate	38	[u'[\'/note="s-methylcysteine intermediate"\']', u'[\'/note="s-(gamma-glutamyl-cysteinyl-glycyl)-cysteine intermediate"\']', u'[\'/note="s-acetylcysteine intermediate"\']', u'[\'/note="phosphocysteine intermediate; for eiib activity"\']', u'[\'/note="s-selanylcysteine intermediate" hamap-rule:mf_01622, prosite-prorule:pru00173"\']', u'[\'/note="phosphocysteine intermediate"\']', u'[\'/note="phosp…
10	ACT_SITE	5	thioester intermediate	37	[u'[\'/note="acyl-thioester intermediate"\']', u'[\'/note="5-glutamyl coenzyme a thioester intermediate"\']', u'[\'/note="acyl-thioester intermediate" hamap-rule:mf_01657"\']', u'[\'/note="acyl-thioester intermediate" hamap-rule:mf_00295,\']', u'[\'/note="acyl-thioester intermediate" hamap-rule:mf_00295,\', \'/note="proton acceptor" hamap-rule:mf_00295,\', \'hamap-rule:mf_00295,\']']
11	ACT_SITE	6	cysteine persulfide	33	[u'[\'/note="cysteine persulfide intermediate" hamap-rule:mf_00469"\']', u'[\'/note="cysteine persulfide intermediate"\']', u'[\'/note="cysteine persulfide intermediate" hamap-rule:mf_00413,\']', u'[\'/note="cysteine persulfide intermediate" hamap-rule:mf_00187,\']', u'[\'/note="cysteine persulfide intermediate" prosite-prorule:pru00173,\']', u'[\'/note="cysteine persulfide intermediate" hamap-ru…
12	ACT_SITE	4	acyl-thioester intermediate	31	[u'[\'/note="acyl-thioester intermediate"\']', u'[\'/note="acyl-thioester intermediate" hamap-rule:mf_01657"\']', u'[\'/note="acyl-thioester intermediate" hamap-rule:mf_00295,\']', u'[\'/note="acyl-thioester intermediate" hamap-rule:mf_00295,\', \'/note="proton acceptor" hamap-rule:mf_00295,\', \'hamap-rule:mf_00295,\']']
13	ACT_SITE	5	phosphocysteine intermediate	29	[u'[\'/note="phosphocysteine intermediate; for eiib activity"\']', u'[\'/note="phosphocysteine intermediate"\']', u'[\'/note="phosphocysteine intermediate; for eiib activity" prosite-prorule:pru00421"\']', u'[\'/note="phosphocysteine intermediate; for eiib activity" prosite-prorule:pru00421,\']', u'[\'/note="phosphocysteine intermediate" prosite-prorule:pru00160"\']']
14	ACT_SITE	4	eiib activity	24	[u'[\'/note="phosphocysteine intermediate; for eiib activity"\']', u'[\'/note="phosphocysteine intermediate; for eiib activity" prosite-prorule:pru00421"\']', u'[\'/note="phosphocysteine intermediate; for eiib activity" prosite-prorule:pru00421,\']', u'[\'/note="pros-phosphohistidine intermediate; for eiib activity"\']']
15	ACT_SITE	2	ring-opening	21	[u'[\'/note="for ring-opening step"\']', u'[\'/note="proton acceptor; for ring-opening step"\']']
16	ACT_SITE	5	acyl-ester intermediate	19	[u'[\'/note="acyl-ester intermediate; for transpeptidase activity"\']', u'[\'/note="acyl-ester intermediate" prosite-prorule:pru10102,\']', u'[\'/note="acyl-ester intermediate"\']', u'[\'/note="acyl-ester intermediate" hamap-rule:mf_02081,\']', u'[\'/note="acyl-ester intermediate" hamap-rule:mf_02080,\']']
17	ACT_SITE	1	atp-dependent protease subunit hslv	18	[u"['hamap-rule:mf_00248,']"]
18	ACT_SITE	3	decarboxylase activity	17	[u'[\'/note="proton acceptor; for decarboxylase activity"\']', u'[\'/note="proton donor; for decarboxylase activity"\']', u'[\'/note="schiff-base intermediate with substrate; via pyruvic acid; for decarboxylase activity" hamap-rule:mf_00662,\', \'/note="charge relay system; for autoendoproteolytic cleavage activity" rule:mf_00662"\']']
19	ACT_SITE	6	eiia activity	17	[u'[\'/note="tele-phosphohistidine intermediate; for eiia activity" prosite-prorule:pru00416"\']', u'[\'/note="tele-phosphohistidine intermediate; for eiia activity" prosite-prorule:pru00416,\']', u'[\'/note="tele-phosphohistidine intermediate; for eiia activity" prosite-prorule:pru00417"\']', u'[\'/note="tele-phosphohistidine intermediate; for pts eiia activity" prosite-prorule:pru00417"\']', u'…
20	ACT_SITE	2	gatase activity	15	[u'[\'/note="for gatase activity"\']', u'[\'/note="nucleophile; for gatase activity"\']']
21	ACT_SITE	2	proteolytic cleavage	15	[u'[\'/note="charge relay system; for autoendoproteolytic cleavage activity" rule:mf_00662"\']', u'[\'/note="schiff-base intermediate with substrate; via pyruvic acid; for decarboxylase activity" hamap-rule:mf_00662,\', \'/note="charge relay system; for autoendoproteolytic cleavage activity" rule:mf_00662"\']']
22	ACT_SITE	2	cysteine sulfenic acid	14	[u'[\'/note="cysteine sulfenic acid (-soh) intermediate"\']', u'[\'/note="cysteine sulfenic acid (-soh) intermediate" hamap-rule:mf_00269,\']']
23	ACT_SITE	1	peptidase b	12	[u'[\'hamap-rule:mf_00504"\']']
24	ACT_SITE	1	cysteine radical	12	[u'[\'/note="cysteine radical intermediate"\']']
25	ACT_SITE	2	aldehyde dehydrogenases glutamic acid	12	[u'[\'prosite-prorule:pru10007"\']', u"['prosite-prorule:pru10007,']"]
26	ACT_SITE	4	aldehyde dehydrogenases cysteine	12	[u'[\'/note="proton acceptor" prosite-prorule:pru10008"\']', u'[\'/note="nucleophile" prosite-prorule:pru10008"\']', u"['prosite-prorule:pru10008,']", u'[\'prosite-prorule:pru10008"\']']
27	ACT_SITE	1	citrate synthase	12	[u'[\'prosite-prorule:pru10117"\']']
28	ACT_SITE	2	phosphoserine intermediate	10	[u'[\'/note="phosphoserine intermediate"\']', u'[\'/note="phosphoserine intermediate" hamap-rule:mf_01038"\']']
29	ACT_SITE	1	transpeptidase activity	9	[u'[\'/note="acyl-ester intermediate; for transpeptidase activity"\']']
30	ACT_SITE	1	transglycosylase activity	9	[u'[\'/note="proton donor; for transglycosylase activity"\']']
31	ACT_SITE	1	catalase proximal active site	8	[u'[\'prosite-prorule:pru10013"\']']
32	ACT_SITE	2	thioimidate intermediate	8	[u'[\'/note="thioimidate intermediate" hamap-rule:mf_01964"\']', u'[\'/note="thioimidate intermediate"\']']
33	ACT_SITE	2	autocatalytic cleavage	8	[u'[\'/note="for autocatalytic cleavage activity"\']', u'[\'/note="for autocatalytic cleavage activity" hamap-rule:mf_00015"\']']
34	ACT_SITE	2	fumarate hydratase class ii	8	[u'[\'/note="proton donor/acceptor" hamap-rule:mf_00743,\']', u'[\'hamap-rule:mf_00743"\']']
35	ACT_SITE	1	other	7	[u'[\'hamap-rule:mf_01224"\']']
36	ACT_SITE	1	enolization	7	[u'[\'/note="proton acceptor; for enolization step"\']']
37	ACT_SITE	1	threonine intermediate	6	[u'[\'/note="o-isoaspartyl threonine intermediate" prosite-prorule:pru10099, prosite-prorule:pru10100,\']']
38	ACT_SITE	1	formyltetrahydrofolate deformylase	6	[u'[\'hamap-rule:mf_01927"\']']
39	ACT_SITE	1	cardiolipin synthase b	6	[u'[\'hamap-rule:mf_01917"\']']
40	ACT_SITE	1	lon protease	6	[u"['hamap-rule:mf_01973,']"]
41	ACT_SITE	1	lipid a palmitoyltransferase	6	[u"['hamap-rule:mf_00837,']"]
42	ACT_SITE	1	cardiolipin synthase c	6	[u'[\'hamap-rule:mf_01918"\']']
43	ACT_SITE	1	formyltransferase activity	6	[u'[\'/note="proton donor; for formyltransferase activity"\']']
44	ACT_SITE	1	cardiolipin synthase a	6	[u'[\'hamap-rule:mf_00190"\']']
45	ACT_SITE	2	4-aspartylphosphate intermediate	5	[u'[\'/note="4-aspartylphosphate intermediate" hamap-rule:mf_00285"\']', u'[\'/note="4-aspartylphosphate intermediate"\']']
46	ACT_SITE	1	s-acetylcysteine intermediate	5	[u'[\'/note="s-acetylcysteine intermediate"\']']
47	ACT_SITE	1	dehydrogenase activity	4	[u'[\'/note="for 3-hydroxyacyl-coa dehydrogenase activity" hamap-rule:mf_01621,\']']
48	ACT_SITE	2	ammonia-lyase activity	4	[u'[\'/note="proton acceptor; for d-dap ammonia-lyase activity"\']', u'[\'/note="proton acceptor; for l-dap ammonia-lyase activity"\']']
49	ACT_SITE	1	ketol-acid reductoisomerase	4	[u'[\'hamap-rule:mf_00435"\']']
50	ACT_SITE	1	ribonucleotide reductase small subunit	4	[u'[\'prosite-prorule:pru10014"\']']
51	ACT_SITE	2	atp-dependent dethiobiotin synthetase	4	[u'[\'hamap-rule:mf_00336"\']', u"['hamap-rule:mf_00336,']"]
52	ACT_SITE	3	lysine intermediate	4	[u'[\'/note="n6-(4-deoxychorismate)-lysine intermediate"\']', u'[\'/note="n6-amp-lysine intermediate"\']', u'[\'/note="n6-amp-lysine intermediate" hamap-rule:mf_01588,\']']
53	ACT_SITE	2	arsc family	4	[u'[\'/note="nucleophile; cysteine thioarsenate intermediate" prosite-prorule:pru01282"\']', u'[\'prosite-prorule:pru01282"\']']
54	ACT_SITE	1	4-hydroxybenzoyl-coa thioesterase family	4	[u'[\'prosite-prorule:pru10041"\']']
55	ACT_SITE	1	glutamine hydrolysis	4	[u'[\'/note="nucleophile; for glutamine hydrolysis"\']']
56	ACT_SITE	1	selenide, water dikinase	4	[u'[\'hamap-rule:mf_00625"\']']
57	ACT_SITE	1	coenzyme a transferases	4	[u'[\'prosite-prorule:pru10034"\']']
58	ACT_SITE	1	n-acetyl-gamma-glutamyl-phosphate reductase	4	[u'[\'hamap-rule:mf_00150"\']']
59	ACT_SITE	1	3-sulfolactaldehyde reductase	4	[u"['hamap-rule:mf_01913,']"]
60	ACT_SITE	1	acetylornithine deacetylase	4	[u'[\'hamap-rule:mf_01108"\']']
61	ACT_SITE	1	dna-serine intermediate	4	[u'[\'/note="o-(5\\\'-phospho-dna)-serine intermediate" prosite-prorule:pru01072"\']']
62	ACT_SITE	1	l-lactate dehydrogenase	4	[u'[\'/note="proton acceptor" hamap-rule:mf_01559"\']']
63	ACT_SITE	2	hpr activity	3	[u'[\'/note="pros-phosphohistidine intermediate; for hpr activity" prosite-prorule:pru00681"\']', u'[\'/note="tele-phosphohistidine intermediate; for hpr activity" prosite-prorule:pru00417"\']']
64	ACT_SITE	1	poly(a) polymerase i	3	[u'[\'hamap-rule:mf_00957"\']']
65	ACT_SITE	1	protein-glutamate methylesterase/protein-glutamine glutaminase	3	[u'[\'rule:mf_00099"\']']
66	ACT_SITE	1	processing activity	3	[u'[\'/note="proton acceptor; for processing activity"\']']
67	ACT_SITE	1	acylphosphatase	2	[u'[\'hamap-rule:mf_01450"\']']
68	ACT_SITE	1	neutral zinc metallopeptidases, zinc-binding region	2	[u'[\'prosite-prorule:pru10095"\']']
69	ACT_SITE	1	fructose-6-phosphate isomerization	2	[u'[\'/note="for fru-6p isomerization activity"\']']
70	ACT_SITE	1	thioesterase activity	2	[u'[\'/note="proton acceptor; for thioesterase activity"\']']
71	ACT_SITE	1	dihydroorotase	2	[u"['hamap-rule:mf_00219,']"]
72	ACT_SITE	1	delta-elimination	2	[u'[\'/note="proton donor; for delta-elimination activity"\']']
73	ACT_SITE	1	2-hydroxy-3-oxopropionate reductase	2	[u'[\'hamap-rule:mf_02032"\']']
74	ACT_SITE	1	glycosyl hydrolases family 25	2	[u'[\'prosite-prorule:pru10065"\']']
75	ACT_SITE	1	beta-elimination	2	[u'[\'/note="proton donor; for beta-elimination activity"\']']
76	ACT_SITE	1	lipoprotein signal peptidase	2	[u'[\'hamap-rule:mf_00161"\']']
77	ACT_SITE	1	thioimide intermediate	2	[u'[\'/note="thioimide intermediate"\']']
78	ACT_SITE	2	substrate epimerization	2	[u'[\'/note="proton acceptor; specific for (r)-substrate epimerization"\']', u'[\'/note="proton acceptor; specific for (s)-substrate epimerization"\']']
79	ACT_SITE	1	prokaryotic transglycosylases	1	[u'[\'prosite-prorule:pru10071"\']']
80	ACT_SITE	1	nuclease activity	1	[u'[\'/note="for nuclease activity"\']']
81	ACT_SITE	1	thioredoxin/glutathione peroxidase btue	1	[u'[\'hamap-rule:mf_02061"\']']
82	ACT_SITE	1	c-5 cytosine-specific dna methylase	1	[u'[\'prosite-prorule:pru01016, prosite-prorule:pru10018"\']']
83	ACT_SITE	1	membrane-bound lytic murein transglycosylase f	1	[u'[\'hamap-rule:mf_02016"\']']
84	ACT_SITE	1	persulfide ester	1	[u'[\'/note="glycyl persulfide ester intermediate"\']']
85	BINDING	118	substrate	2390	[u'[\'/note="substrate"\']', u'[\'/note="substrate; via amide nitrogen"\']', u'[\'/note="substrate" hamap-rule:mf_01939,\']', u'[\'/note="substrate; covalent"\']', u'[\'/note="phosphate (substrate) binding" hamap-rule:mf_00564"\']', u'[\'/note="substrate" hamap-rule:mf_01033"\']', u'[\'/note="substrate; via carbonyl oxygen"\']', u'[\'/note="substrate" rule:mf_02095"\']', u'[\'/note="substrate" ha…
86	BINDING	65	atp	731	[u'[\'/note="atp"\']', u'[\'/note="atp" hamap-rule:mf_00347,\']', u'[\'/note="atp" hamap-rule:mf_00451"\']', u'[\'/note="atp; via amide nitrogen and carbonyl oxygen"\']', u'[\'/note="atp; via amide nitrogen"\']', u'[\'/note="atp"\', \'/note="aspartate"\']', u'[\'/note="atp" hamap-rule:mf_00747"\']', u'[\'/note="atp" hamap-rule:mf_01987,\']', u'[\'/note="atp" hamap-rule:mf_00285,\']', u'[\'/note="…
87	BINDING	110	via amide nitrogen	721	[u'[\'/note="substrate; via amide nitrogen"\']', u'[\'/note="glutathione; via amide nitrogen and carbonyl oxygen"\']', u'[\'/note="chloride; via amide nitrogen"\']', u'[\'/note="s-adenosyl-l-methionine; via amide nitrogen and carbonyl oxygen"\']', u'[\'/note="dxp; via amide nitrogen"\']', u'[\'/note="phosphate; via amide nitrogen"\']', u'[\'/note="atp; via amide nitrogen and carbonyl oxygen"\']',…
88	BINDING	90	via carbonyl oxygen	555	[u'[\'/note="coenzyme a; via carbonyl oxygen"\']', u'[\'/note="glutathione; via amide nitrogen and carbonyl oxygen"\']', u'[\'/note="s-adenosyl-l-methionine; via amide nitrogen and carbonyl oxygen"\']', u'[\'/note="s-adenosyl-l-methionine; via carbonyl oxygen" hamap-rule:mf_00472,\']', u'[\'/note="s-adenosyl-l-methionine; via carbonyl oxygen" hamap-rule:mf_00735"\']', u'[\'/note="substrate; via c…
89	BINDING	37	nad	442	[u'[\'/note="nad 1"\']', u'[\'/note="nad 1; shared with dimeric partner"\']', u'[\'/note="substrate" hamap-rule:mf_00394"\', \'/note="nad; via amide nitrogen" hamap-rule:mf_00394"\']', u'[\'/note="nad; via amide nitrogen" hamap-rule:mf_00394"\']', u'[\'/note="nad" hamap-rule:mf_00394"\']', u'[\'/note="nad" hamap-rule:mf_01825"\']', u'[\'/note="nad; via carbonyl oxygen" hamap-rule:mf_01825"\']', u…
90	BINDING	18	nadp	249	[u'[\'/note="nadp"\']', u'[\'/note="nadp" hamap-rule:mf_00435,\']', u'[\'/note="nadp; via amide nitrogen" hamap-rule:mf_00435"\']', u'[\'/note="nadp"\', \'/note="fad"\']', u'[\'/note="nadp" hamap-rule:mf_00955"\']', u'[\'/note="nadp" hamap-rule:mf_00955"\', \'/note="nadp"\']', u'[\'/note="nadp" hamap-rule:mf_00956,\']', u'[\'/note="nadp" hamap-rule:mf_00966"\']', u'[\'/note="nadp; via carbonyl ox…
91	BINDING	45	methionine	244	[u'[\'/note="s-adenosyl-l-methionine"\']', u'[\'/note="s-adenosyl-l-methionine; via amide nitrogen and carbonyl oxygen"\']', u'[\'/note="s-adenosyl-l-methionine" hamap-rule:mf_00472,\']', u'[\'/note="s-adenosyl-l-methionine; via carbonyl oxygen" hamap-rule:mf_00472,\']', u'[\'/note="s-adenosyl-l-methionine" hamap-rule:mf_01589,\']', u'[\'/note="s-adenosyl-l-methionine" hamap-rule:mf_00735"\']', u…
92	BINDING	43	s-adenosyl-l-methionine	228	[u'[\'/note="s-adenosyl-l-methionine"\']', u'[\'/note="s-adenosyl-l-methionine; via amide nitrogen and carbonyl oxygen"\']', u'[\'/note="s-adenosyl-l-methionine" hamap-rule:mf_00472,\']', u'[\'/note="s-adenosyl-l-methionine; via carbonyl oxygen" hamap-rule:mf_00472,\']', u'[\'/note="s-adenosyl-l-methionine" hamap-rule:mf_01589,\']', u'[\'/note="s-adenosyl-l-methionine" hamap-rule:mf_00735"\']', u…
93	BINDING	13	fad	163	[u'[\'/note="fad"\']', u'[\'/note="nadp"\', \'/note="fad"\']', u'[\'/note="fad; via amide nitrogen"\']', u'[\'/note="fad; via amide nitrogen and carbonyl oxygen"\']', u'[\'/note="fad" hamap-rule:mf_01541,\']', u'[\'/note="fad; via carbonyl oxygen" hamap-rule:mf_01541,\']', u'[\'/note="fad; via amide nitrogen" hamap-rule:mf_02092,\']', u'[\'/note="fad" hamap-rule:mf_02092,\']', u'[\'/note="fad; vi…
94	BINDING	7	guanine	140	[u'[\'/note="mo-bis(molybdopterin guanine dinucleotide)" hamap-rule:mf_01630,\']', u'[\'/note="mo-bis(molybdopterin guanine dinucleotide); via amide nitrogen" hamap-rule:mf_01630,\']', u'[\'/ligand="mo-bis(molybdopterin guanine dinucleotide)" /ligand_id="chebi:chebi:60539"\', \'/ligand="mo-bis(molybdopterin guanine dinucleotide)" /ligand_id="chebi:chebi:60539" /ligand_part="mo" /ligand_part_id="c…
95	BINDING	7	molybdopterin	137	[u'[\'/note="mo-bis(molybdopterin guanine dinucleotide)" hamap-rule:mf_01630,\']', u'[\'/note="mo-bis(molybdopterin guanine dinucleotide); via amide nitrogen" hamap-rule:mf_01630,\']', u'[\'/ligand="mo-bis(molybdopterin guanine dinucleotide)" /ligand_id="chebi:chebi:60539"\', \'/ligand="mo-bis(molybdopterin guanine dinucleotide)" /ligand_id="chebi:chebi:60539" /ligand_part="mo" /ligand_part_id="c…
96	BINDING	5	molybdopterin guanine dinucleotide	132	[u'[\'/note="mo-bis(molybdopterin guanine dinucleotide)" hamap-rule:mf_01630,\']', u'[\'/note="mo-bis(molybdopterin guanine dinucleotide); via amide nitrogen" hamap-rule:mf_01630,\']', u'[\'/ligand="mo-bis(molybdopterin guanine dinucleotide)" /ligand_id="chebi:chebi:60539"\', \'/ligand="mo-bis(molybdopterin guanine dinucleotide)" /ligand_id="chebi:chebi:60539" /ligand_part="mo" /ligand_part_id="c…
97	BINDING	4	uracil	131	[u'[\'/note="uracil; via amide nitrogen"\']', u'[\'/note="uracil"\']', u'[\'/note="5-amino-6-(d-ribitylamino)uracil"\']', u'[\'/note="5-amino-6-(d-ribitylamino)uracil; via amide nitrogen and carbonyl oxygen"\']']
98	BINDING	10	pyridoxal phosphate	108	[u'[\'/note="pyridoxal phosphate"\']', u'[\'/note="pyridoxal phosphate; via carbonyl oxygen" rule:mf_01107"\']', u'[\'/note="pyridoxal phosphate" rule:mf_01107"\']', u'[\'/note="pyridoxal phosphate" hamap-rule:mf_00331"\']', u'[\'/note="pyridoxal phosphate" hamap-rule:mf_00331,\']', u'[\'/note="pyridoxal phosphate" hamap-rule:mf_00985,\']', u'[\'/note="pyridoxal phosphate; shared with dimeric par…
99	BINDING	5	amp	87	[u'[\'/note="amp"\']', u'[\'/note="amp; via amide nitrogen and carbonyl oxygen"\']', u'[\'/note="n(6)-(1,2-dicarboxyethyl)-amp"\', \'/note="fumarate"\', \'/note="amp"\']', u'[\'/note="n(6)-(1,2-dicarboxyethyl)-amp"\', \'/note="amp"\']', u'[\'/note="amp" hamap-rule:mf_00235,\']']
100	BINDING	15	covalent	84	[u'[\'/note="heme; covalent, via pros nitrogen"\']', u'[\'/note="substrate; covalent"\']', u'[\'/note="substrate; covalent; in inhibited form"\']', u'[\'/note="heme c 1; covalent"\']', u'[\'/note="heme c 2; covalent"\']', u'[\'/note="heme 1; covalent"\']', u'[\'/note="heme 2; covalent"\']', u'[\'/note="heme 3; covalent"\']', u'[\'/note="heme 4; covalent"\']', u'[\'/note="heme 1; covalent" prosite…
101	BINDING	15	flavin mono nucleotide	83	[u'[\'/note="fmn" hamap-rule:mf_01414,\']', u'[\'/note="fmn" hamap-rule:mf_01559"\']', u'[\'/note="fmn; via amide nitrogen"\']', u'[\'/note="fmn"\']', u'[\'/note="substrate"\', \'/note="fmn"\']', u'[\'/note="fmn; via carbonyl oxygen"\']', u'[\'/note="fmn; shared with dimeric partner"\']', u'[\'/note="nad"\', \'/note="fmn"\']', u'[\'/note="fmn" hamap-rule:mf_01216,\']', u'[\'/note="fmn" hamap-rule…
102	BINDING	4	glutamate	82	[u'[\'/note="glutamate"\']', u'[\'/note="l-glutamate; via carbonyl oxygen"\']', u'[\'/note="l-glutamate"\']', u'[\'/note="atp"\', \'/note="l-glutamate"\']']
103	BINDING	5	ctp	73	[u'[\'/note="ctp" hamap-rule:mf_02225,\']', u'[\'/note="ctp; via amide nitrogen" hamap-rule:mf_02225,\']', u'[\'/note="ctp; allosteric inhibitor; alternate"\', \'/note="utp; alternate"\']', u'[\'/note="atp; via amide nitrogen" hamap-rule:mf_01261"\', \'/note="ctp; via amide nitrogen" hamap-rule:mf_01261"\']', u'[\'/note="ctp" hamap-rule:mf_01261"\', \'/note="atp" hamap-rule:mf_01261"\']']
104	BINDING	6	gtp	71	[u'[\'/note="gtp"\']', u'[\'/note="gtp" hamap-rule:mf_00909"\']', u'[\'/note="gtp" hamap-rule:mf_00011,\']', u'[\'/note="gtp; via carbonyl oxygen"\']', u'[\'/note="8-oxo-dgtp"\']', u'[\'/note="gtp" hamap-rule:mf_01225"\']']
105	BINDING	13	heme	70	[u'[\'/note="heme; covalent, via pros nitrogen"\']', u'[\'/note="heme c 1; covalent"\']', u'[\'/note="heme c 2; covalent"\']', u'[\'/note="heme 1; covalent"\']', u'[\'/note="heme 2; covalent"\']', u'[\'/note="heme 3; covalent"\']', u'[\'/note="heme 4; covalent"\']', u'[\'/note="heme 1; covalent" prosite-prorule:pru00433"\']', u'[\'/note="heme 2; covalent" prosite-prorule:pru00433"\']', u'[\'/note…
106	BINDING	14	dimer interface	68	[u'[\'/note="nad 1; shared with dimeric partner"\']', u'[\'/note="acetyl-coa; shared with dimeric partner"\']', u'[\'/note="sulfide; allosteric inhibitor; shared with dimeric partner"\']', u'[\'/note="purine nucleoside; shared with dimeric partner"\']', u'[\'/note="phosphate; shared with dimeric partner"\']', u'[\'/note="fmn; shared with dimeric partner"\']', u'[\'/note="substrate; shared with di…
107	BINDING	14	allosteric	65	[u'[\'/note="sulfide; allosteric inhibitor; shared with dimeric partner"\']', u'[\'/note="sulfide; allosteric inhibitor"\']', u'[\'/note="sulfide; allosteric inhibitor; via amide nitrogen"\']', u'[\'/note="l-asparagine 2; allosteric activator l-asparagine"\']', u'[\'/note="adp; allosteric activator" hamap-rule:mf_00339,\']', u'[\'/note="adp; allosteric activator" rule:mf_00339"\']', u'[\'/note="p…
108	BINDING	6	glutathione	63	[u'[\'/note="glutathione; via amide nitrogen and carbonyl oxygen"\']', u'[\'/note="glutathione"\']', u'[\'/note="glutathione 2"\']', u'[\'/note="glutathione 1"\']', u'[\'/note="glutathione 1; via amide nitrogen and carbonyl oxygen"\']', u'[\'/note="glutathione; shared with dimeric partner"\']']
109	BINDING	11	glucose	61	[u'[\'/note="beta-d-glucose"\']', u'[\'/note="d-glucose 6-phosphate"\']', u'[\'/note="udp-glucose"\']', u'[\'/note="udp-glucose; via amide nitrogen and carbonyl oxygen"\']', u'[\'/note="udp-alpha-d-glucose; via amide nitrogen"\']', u'[\'/note="udp-alpha-d-glucose"\']', u'[\'/note="alpha-d-glucose 1-phosphate"\']', u'[\'/note="alpha-d-glucose 1-phosphate; via amide nitrogen"\']', u'[\'/note="alpha…
110	BINDING	1	1-deoxy-l-glycero-tetrulose 4-phosphate	60	[u'[\'/note="1-deoxy-l-glycero-tetrulose 4-phosphate"\']']
111	BINDING	4	phosphate	57	[u'[\'/note="phosphate; via amide nitrogen"\']', u'[\'/note="phosphate"\']', u'[\'/note="phosphate; shared with dimeric partner"\']', u'[\'/note="phosphate" hamap-rule:mf_02121"\']']
112	BINDING	11	acetyl-coa	52	[u'[\'/note="acetyl-coa; via amide nitrogen" hamap-rule:mf_01631,\']', u'[\'/note="acetyl-coa" hamap-rule:mf_01631,\']', u'[\'/note="acetyl-coa"\']', u'[\'/note="acetyl-coa; via amide nitrogen"\']', u'[\'/note="acetyl-coa; via amide nitrogen and carbonyl oxygen"\']', u'[\'/note="acetyl-coa; shared with dimeric partner"\']', u'[\'/note="acetyl-coa" hamap-rule:mf_02210"\']', u'[\'/note="acetyl-coa"…
113	BINDING	6	thiamine	49	[u'[\'/note="thiamine pyrophosphate"\']', u'[\'/note="thiamine"\']', u'[\'/note="thiamine pyrophosphate; via amide nitrogen"\']', u'[\'/note="thiamine pyrophosphate"\', \'/note="substrate"\']', u'[\'/note="thiamine pyrophosphate" hamap-rule:mf_00850,\']', u'[\'/note="thiamine pyrophosphate" hamap-rule:mf_00850,\', \'/note="thiamine pyrophosphate"\']']
114	BINDING	5	thiamine pyrophosphate	48	[u'[\'/note="thiamine pyrophosphate"\']', u'[\'/note="thiamine pyrophosphate; via amide nitrogen"\']', u'[\'/note="thiamine pyrophosphate"\', \'/note="substrate"\']', u'[\'/note="thiamine pyrophosphate" hamap-rule:mf_00850,\']', u'[\'/note="thiamine pyrophosphate" hamap-rule:mf_00850,\', \'/note="thiamine pyrophosphate"\']']
115	BINDING	5	tpp	48	[u'[\'/note="thiamine pyrophosphate"\']', u'[\'/note="thiamine pyrophosphate; via amide nitrogen"\']', u'[\'/note="thiamine pyrophosphate"\', \'/note="substrate"\']', u'[\'/note="thiamine pyrophosphate" hamap-rule:mf_00850,\']', u'[\'/note="thiamine pyrophosphate" hamap-rule:mf_00850,\', \'/note="thiamine pyrophosphate"\']']
116	BINDING	8	cobalamin	47	[u'[\'/note="methylcob(iii)alamin"\']', u'[\'/note="methylcob(iii)alamin; via amide nitrogen"\']', u'[\'/note="cyanocob(iii)alamin" hamap-rule:mf_01000,\']', u'[\'/note="adenosylcob(iii)alamin; via carbonyl oxygen" hamap-rule:mf_00861,\']', u'[\'/note="adenosylcob(iii)alamin" hamap-rule:mf_00861,\']', u'[\'/note="adenosylcob(iii)alamin; via amide nitrogen" hamap-rule:mf_00601,\']', u'[\'/note="ad…
117	BINDING	6	adp	42	[u'[\'/note="adp; via carbonyl oxygen"\']', u'[\'/note="adp; via amide nitrogen"\']', u'[\'/note="adp"\']', u'[\'/note="adp; allosteric activator" hamap-rule:mf_00339,\']', u'[\'/note="adp; allosteric activator" rule:mf_00339"\']', u'[\'/note="adp; via amide nitrogen and carbonyl oxygen"\', \'/note="atp; via amide nitrogen and carbonyl oxygen"\']']
118	BINDING	3	phosphoenolpyruvate	41	[u'[\'/note="pep"\']', u'[\'/note="phosphoenolpyruvate" hamap-rule:mf_00210,\']', u'[\'/note="phosphoenolpyruvate; allosteric activator"\', \'/note="citrate; allosteric activator"\']']
119	BINDING	7	aspartate	36	[u'[\'/note="atp"\', \'/note="aspartate"\']', u'[\'/note="citrulline"\', \'/note="aspartate"\']', u'[\'/note="iminoaspartate" rule:mf_00567"\']', u'[\'/note="iminoaspartate; via amide nitrogen" rule:mf_00567"\']', u'[\'/note="aspartate; via amide nitrogen"\']', u'[\'/note="aspartate"\']', u'[\'/note="aspartate" hamap-rule:mf_00044"\']']
120	BINDING	8	inhibitor	36	[u'[\'/note="sulfide; allosteric inhibitor; shared with dimeric partner"\']', u'[\'/note="sulfide; allosteric inhibitor"\']', u'[\'/note="sulfide; allosteric inhibitor; via amide nitrogen"\']', u'[\'/note="platensimycin; inhibitor"\', \'/note="platencin; inhibitor"\']', u'[\'/note="platensimycin; inhibitor"\']', u'[\'/note="beta-d-glucose-6-phosphate; allosteric inhibitor"\']', u'[\'/note="ctp; a…
121	BINDING	1	1-deoxy-d-xylulose 5-phosphate	34	[u'[\'/note="1-deoxy-d-xylulose 5-phosphate"\']']
122	BINDING	2	l-lactate dehydrogenase	32	[u'[\'/note="substrate" hamap-rule:mf_01559"\']', u'[\'/note="fmn" hamap-rule:mf_01559"\']']
123	BINDING	1	dna	30	[u'[\'/note="dna"\']']
124	BINDING	2	udp-glucuronate	30	[u'[\'/note="udp-glucuronate; via carbonyl oxygen"\']', u'[\'/note="udp-glucuronate"\']']
125	BINDING	3	glcnac	30	[u'[\'/note="udp-glcnac" hamap-rule:mf_01631"\']', u'[\'/note="udp-glcnac" hamap-rule:mf_01631,\']', u'[\'/note="udp-glcnac; via amide nitrogen" hamap-rule:mf_01631,\']']
126	BINDING	6	allosteric inhibitor	30	[u'[\'/note="sulfide; allosteric inhibitor; shared with dimeric partner"\']', u'[\'/note="sulfide; allosteric inhibitor"\']', u'[\'/note="sulfide; allosteric inhibitor; via amide nitrogen"\']', u'[\'/note="beta-d-glucose-6-phosphate; allosteric inhibitor"\']', u'[\'/note="ctp; allosteric inhibitor; alternate"\', \'/note="utp; alternate"\']', u'[\'/note="atp 1; substrate atp; shared with dimeric p…
127	BINDING	6	allosteric activator	29	[u'[\'/note="l-asparagine 2; allosteric activator l-asparagine"\']', u'[\'/note="adp; allosteric activator" hamap-rule:mf_00339,\']', u'[\'/note="adp; allosteric activator" rule:mf_00339"\']', u'[\'/note="phosphoenolpyruvate; allosteric activator"\', \'/note="citrate; allosteric activator"\']', u'[\'/note="citrate; allosteric activator; via amide nitrogen"\']', u'[\'/note="atp; allosteric activat…
128	BINDING	6	activator	29	[u'[\'/note="l-asparagine 2; allosteric activator l-asparagine"\']', u'[\'/note="adp; allosteric activator" hamap-rule:mf_00339,\']', u'[\'/note="adp; allosteric activator" rule:mf_00339"\']', u'[\'/note="phosphoenolpyruvate; allosteric activator"\', \'/note="citrate; allosteric activator"\']', u'[\'/note="citrate; allosteric activator; via amide nitrogen"\']', u'[\'/note="atp; allosteric activat…
129	BINDING	2	citrulline	28	[u'[\'/note="citrulline"\']', u'[\'/note="citrulline"\', \'/note="aspartate"\']']
130	BINDING	4	imp	26	[u'[\'/note="imp"\', \'/note="gmp"\']', u'[\'/note="imp" hamap-rule:mf_01964"\']', u'[\'/note="imp" hamap-rule:mf_00011,\']', u'[\'/note="imp; shared with dimeric partner" hamap-rule:mf_00011,\']']
131	BINDING	3	ferredoxin	26	[u'[\'/ligand="[4fe-4s] cluster" /ligand_id="chebi:chebi:49883" prosite-prorule:pru01004,\']', u'[\'/ligand="[4fe-4s] cluster" /ligand_id="chebi:chebi:49883"\']', u'[\'/ligand="[4fe-4s] cluster" /ligand_id="chebi:chebi:49883" prosite-prorule:pru01004"\']']
132	BINDING	3	formyltetrahydrofolate	26	[u'[\'/note="10-formyltetrahydrofolate"\']', u'[\'/note="10-formyltetrahydrofolate" hamap-rule:mf_01930,\']', u'[\'/note="formyltetrahydrofolate" hamap-rule:mf_00379"\']']
133	BINDING	4	spermidine	25	[u'[\'/note="spermidine"\']', u'[\'/note="glutathionylspermidine"\']', u'[\'/note="spermine"\', \'/note="spermidine"\']', u'[\'/note="spermidine" hamap-rule:mf_00198"\']']
134	BINDING	4	protein-protein interface	24	[u'[\'/note="substrate; shared with neighboring subunit" hamap-rule:mf_01934,\']', u'[\'/note="methionine; shared with neighboring subunit" hamap-rule:mf_00086,\', \'/note="atp; shared with neighboring subunit" hamap-rule:mf_00086,\']', u'[\'/note="atp; via amide nitrogen; shared with neighboring subunit" hamap-rule:mf_00086,\']', u'[\'/note="atp; shared with neighboring subunit" hamap-rule:mf_00…
135	BINDING	2	shikimate	24	[u'[\'/note="shikimate-3-phosphate" hamap-rule:mf_00210,\']', u'[\'/note="shikimate" hamap-rule:mf_00222"\']']
136	BINDING	9	coenzyme-a	24	[u'[\'/note="coenzyme a; via carbonyl oxygen"\']', u'[\'/note="coenzyme a"\']', u'[\'/note="coenzyme a" hamap-rule:mf_01050,\']', u'[\'/note="coenzyme a" hamap-rule:mf_00742,\']', u'[\'/note="coenzyme a" hamap-rule:mf_00742"\']', u'[\'/note="coenzyme a" hamap-rule:mf_01123"\']', u'[\'/note="coenzyme a; via carbonyl oxygen" hamap-rule:mf_01123"\']', u'[\'/note="coenzyme a; via amide nitrogen"\']',…
137	BINDING	3	fumarate	24	[u'[\'/note="fumarate"\']', u'[\'/note="n(6)-(1,2-dicarboxyethyl)-amp"\', \'/note="fumarate"\', \'/note="amp"\']', u'[\'/note="n(6)-(1,2-dicarboxyethyl)-amp"\', \'/note="fumarate"\']']
138	BINDING	2	3-amino-2-oxopropyl phosphate	24	[u'[\'/note="3-amino-2-oxopropyl phosphate"\']', u'[\'/note="3-amino-2-oxopropyl phosphate; via amide nitrogen"\']']
139	BINDING	5	gmp	22	[u'[\'/note="gmp"\']', u'[\'/note="imp"\', \'/note="gmp"\']', u'[\'/note="gmp; via carbonyl oxygen"\']', u'[\'/note="5-phospho-alpha-d-ribose 1-diphosphate"\', \'/note="gmp"\']', u'[\'/note="gmp" hamap-rule:mf_02246,\']']
140	BINDING	2	carbamoyl phosphate	21	[u'[\'/note="carbamoyl phosphate"\']', u'[\'/note="carbamoyl phosphate" hamap-rule:mf_01109"\']']
141	BINDING	3	ketol-acid reductoisomerase	20	[u'[\'/note="nadp" hamap-rule:mf_00435,\']', u'[\'/note="nadp; via amide nitrogen" hamap-rule:mf_00435"\']', u'[\'/note="substrate" hamap-rule:mf_00435"\']']
142	BINDING	1	lactate	20	[u'[\'/note="l-lactate"\']']
143	BINDING	1	alpha-ketoisovalerate	20	[u'[\'/note="alpha-ketoisovalerate"\']']
144	BINDING	4	3-sulfolactaldehyde reductase	20	[u'[\'/note="nad" hamap-rule:mf_01913,\']', u'[\'/note="nad; via carbonyl oxygen" hamap-rule:mf_01913,\']', u'[\'/note="nad; via amide nitrogen" hamap-rule:mf_01913,\']', u'[\'/note="2,3-dihydroxypropane-1-sulfonate; via amide nitrogen and carbonyl oxygen" hamap-rule:mf_01913,\']']
145	BINDING	5	glutamine	19	[u'[\'/note="glutamine"\']', u'[\'/note="l-glutamine" hamap-rule:mf_00126,\']', u'[\'/note="l-glutamine; via carbonyl oxygen" hamap-rule:mf_01227"\']', u'[\'/note="l-glutamine" hamap-rule:mf_01227"\']', u'[\'/note="l-glutamine; via amide nitrogen" hamap-rule:mf_01227"\']']
146	BINDING	2	purine	18	[u'[\'/note="purine nucleoside; shared with dimeric partner"\']', u'[\'/note="purine nucleoside"\']']
147	BINDING	3	xanthine	18	[u'[\'/note="guanine"\', \'/note="xanthine"\']', u'[\'/note="xanthine; via amide nitrogen and carbonyl oxygen"\', \'/note="guanine; via amide nitrogen and carbonyl oxygen"\']', u'[\'/note="hypoxanthine"\']']
148	BINDING	1	isopentenyl diphosphate	18	[u'[\'/note="isopentenyl diphosphate"\']']
149	BINDING	2	udp-galp	18	[u'[\'/note="udp-galp; via amide nitrogen"\', \'/note="fad; via amide nitrogen"\']', u'[\'/note="udp-galp"\']']
150	BINDING	4	agmatine	16	[u'[\'/note="l-arginine; via carbonyl oxygen"\', \'/note="agmatine; via carbonyl oxygen"\']', u'[\'/note="agmatine; via carbonyl oxygen"\']', u'[\'/note="agmatine; via amide nitrogen and carbonyl oxygen"\']', u'[\'/note="agmatine"\']']
151	BINDING	3	glycochenodeoxycholate	16	[u'[\'/note="glycochenodeoxycholate; via amide nitrogen"\']', u'[\'/note="glycochenodeoxycholate"\']', u'[\'/note="nad"\', \'/note="glycochenodeoxycholate"\']']
152	BINDING	2	chloride	16	[u'[\'/note="chloride"\']', u'[\'/note="chloride; via amide nitrogen"\']']
153	BINDING	5	trna	16	[u'[\'/note="adenosine residue; binds 2\\\'-oh of adenine 76 of trna(thr), the trna acceptor base"\']', u'[\'/note="trna(thr)"\']', u'[\'/note="3\\\'-cca residue; binds 3\\\'-cca of trna"\']', u'[\'/note="trna; binds anticodon region of trna"\']', u'[\'/note="mrna; binds mrna operator"\', \'/note="trna; binds anticodon region of trna"\']']
154	BINDING	4	pyruvate	16	[u'[\'/note="phosphoenolpyruvate" hamap-rule:mf_00210,\']', u'[\'/note="pyruvate" hamap-rule:mf_00418,\']', u'[\'/note="pyruvate; via carbonyl oxygen" hamap-rule:mf_00418,\']', u'[\'/note="phosphoenolpyruvate; allosteric activator"\', \'/note="citrate; allosteric activator"\']']
155	BINDING	3	ornithine	16	[u'[\'/note="n2-acetyl-l-ornithine" rule:mf_01107"\']', u'[\'/note="ornithine"\']', u'[\'/note="ornithine" hamap-rule:mf_01109"\']']
156	BINDING	1	glucose 6-phosphate	16	[u'[\'/note="d-glucose 6-phosphate"\']']
157	BINDING	1	mannose	15	[u'[\'/note="gdp-alpha-d-mannose"\']']
158	BINDING	1	tmp	14	[u'[\'/note="tmp"\']']
159	BINDING	2	5-phospho-alpha-d-ribose 1-diphosphate	13	[u'[\'/note="5-phospho-alpha-d-ribose 1-diphosphate"\', \'/note="gmp"\']', u'[\'/note="5-phospho-alpha-d-ribose 1-diphosphate"\']']
160	BINDING	1	ribose-5-phosphate	12	[u'[\'/note="ribose-5-phosphate" hamap-rule:mf_00583"\']']
161	BINDING	1	selenide, water dikinase	12	[u'[\'/note="atp" rule:mf_00625"\']']
162	BINDING	2	ubiquinone	12	[u'[\'/note="ubiquinone"\']', u'[\'/note="ubiquinone; shared with sdhd subunit"\']']
163	BINDING	2	spermine	12	[u'[\'/note="spermine"\']', u'[\'/note="spermine"\', \'/note="spermidine"\']']
164	BINDING	2	fumarate hydratase class ii	12	[u'[\'/note="substrate"\', \'/note="substrate" hamap-rule:mf_00743"\']', u'[\'/note="substrate" hamap-rule:mf_00743"\']']
165	BINDING	3	ethanolamine	12	[u'[\'/note="ethanolamine 1"\']', u'[\'/note="ethanolamine 2"\']', u'[\'/note="ethanolamine 1; via pi-pi stacking"\']']
166	BINDING	3	sulfide	12	[u'[\'/note="sulfide; allosteric inhibitor; shared with dimeric partner"\']', u'[\'/note="sulfide; allosteric inhibitor"\']', u'[\'/note="sulfide; allosteric inhibitor; via amide nitrogen"\']']
167	BINDING	2	ump	12	[u'[\'/note="ump; via amide nitrogen"\']', u'[\'/note="ump"\']']
168	BINDING	4	atp-dependent dethiobiotin synthetase	12	[u'[\'/note="atp" hamap-rule:mf_00336"\']', u'[\'/note="substrate" hamap-rule:mf_00336,\']', u'[\'/note="atp" hamap-rule:mf_00336,\']', u'[\'/note="substrate"\', \'/note="substrate" hamap-rule:mf_00336,\']']
169	BINDING	2	l-arginine	12	[u'[\'/note="l-arginine; via carbonyl oxygen"\', \'/note="agmatine; via carbonyl oxygen"\']', u'[\'/note="l-arginine"\']']
170	BINDING	5	glucosamine	11	[u'[\'/note="udp-n-acetylglucosamine"\']', u'[\'/note="udp-n-acetylglucosamine; via carbonyl oxygen"\']', u'[\'/note="udp-n-acetyl-alpha-d-glucosamine" hamap-rule:mf_00033,\']', u'[\'/note="udp-n-acetyl-alpha-d-glucosamine" hamap-rule:mf_00033"\']', u'[\'/note="udp-n-acetyl-alpha-d-glucosamine; via amide nitrogen and carbonyl oxygen" hamap-rule:mf_00033,\']']
171	BINDING	1	glyceraldehyde 3-phosphate	10	[u'[\'/note="glyceraldehyde 3-phosphate"\']']
172	BINDING	1	6-hydroxymethyl-7,8-dihydropterin diphosphate	10	[u'[\'/note="6-hydroxymethyl-7,8-dihydropterin diphosphate"\']']
173	BINDING	3	taurine	10	[u'[\'/note="taurine"\']', u'[\'/note="taurine; via amide nitrogen"\']', u'[\'/note="taurine"\', \'/note="2-oxoglutarate"\']']
174	BINDING	3	dihydroorotase	10	[u'[\'/note="substrate" hamap-rule:mf_00219,\']', u'[\'/note="substrate; via amide nitrogen and carbonyl oxygen" hamap-rule:mf_00219,\']', u'[\'/note="substrate; via carbonyl oxygen" hamap-rule:mf_00219,\']']
175	BINDING	2	deamido-nad	10	[u'[\'/note="deamido-nad" hamap-rule:mf_00193,\', \'/note="deamido-nad"\']', u'[\'/note="deamido-nad" hamap-rule:mf_00193,\']']
176	BINDING	4	5-phosphoribose 1-diphosphate	10	[u'[\'/note="5-phosphoribose 1-diphosphate" hamap-rule:mf_01208"\']', u'[\'/note="5-phosphoribose 1-diphosphate; shared with dimeric partner" hamap-rule:mf_01208,\']', u'[\'/note="5-phosphoribose 1-diphosphate" hamap-rule:mf_01208,\']', u'[\'/note="5-phosphoribose 1-diphosphate; shared with dimeric partner" hamap-rule:mf_01208"\']']
177	BINDING	2	arabinose	10	[u'[\'/note="alpha-l-arabinose; via carbonyl oxygen"\']', u'[\'/note="alpha-l-arabinose"\']']
178	BINDING	1	geranyl diphosphate	10	[u'[\'/note="geranyl diphosphate"\']']
179	BINDING	1	3-dehydroquinate	10	[u'[\'/note="3-dehydroquinate" hamap-rule:mf_00214"\']']
180	BINDING	2	trehalose-6-phosphate	10	[u'[\'/note="trehalose-6-phosphate; via carbonyl oxygen"\']', u'[\'/note="trehalose-6-phosphate"\']']
181	BINDING	1	gdp	9	[u'[\'/note="gdp"\']']
182	BINDING	2	2-oxoglutarate	9	[u'[\'/note="2-oxoglutarate"\']', u'[\'/note="taurine"\', \'/note="2-oxoglutarate"\']']
183	BINDING	2	dihydroxyacetone	8	[u'[\'/note="dihydroxyacetone"\']', u'[\'/note="dihydroxyacetone phosphate; via amide nitrogen"\']']
184	BINDING	1	ribulose 5-phosphate	8	[u'[\'/note="d-ribulose 5-phosphate"\']']
185	BINDING	3	udp-murnac	8	[u'[\'/note="udp-murnac-l-ala-d-glu; via carbonyl oxygen"\']', u'[\'/note="udp-murnac-l-ala-d-glu"\']', u'[\'/note="udp-murnac-l-ala"\']']
186	BINDING	1	1-deoxy-d-xylulose-5-phosphate binding	8	[u'[\'/note="dxp; via amide nitrogen"\']']
187	BINDING	1	polyprenyl diphosphate	8	[u'[\'/note="polyprenyl diphosphate"\']']
188	BINDING	2	menaquinone	7	[u'[\'/note="menaquinone"\']', u'[\'/note="menaquinone; via pros nitrogen"\']']
189	BINDING	1	2'-deoxycytidine phosphate	6	[u'[\'/note="dctp" hamap-rule:mf_00146,\']']
190	BINDING	1	phytate	6	[u'[\'/note="phytate"\']']
191	BINDING	2	l-alanine	6	[u'[\'/note="l-alanine; via amide nitrogen"\']', u'[\'/note="l-alanine"\']']
192	BINDING	2	thioadenosine	6	[u'[\'/note="s-methyl-5\\\'-thioadenosine" hamap-rule:mf_00198"\']', u'[\'/note="s-methyl-5\\\'-thioadenosine; via carbonyl oxygen" hamap-rule:mf_00198"\']']
193	BINDING	1	glyoxylate	6	[u'[\'/note="glyoxylate"\']']
194	BINDING	2	chorismate	6	[u'[\'/note="chorismate"\']', u'[\'/note="chorismate; via amide nitrogen"\']']
195	BINDING	1	tyrosine	6	[u'[\'/note="tyrosine" hamap-rule:mf_02006,\']']
196	BINDING	1	phosphoribosylglycinamide	6	[u'[\'/note="5\\\'-phosphoribosylglycinamide" hamap-rule:mf_01643,\']']
197	BINDING	2	erythritol	6	[u'[\'/note="4-cdp-2-c-methyl-d-erythritol 2-phosphate; via amide nitrogen"\']', u'[\'/note="4-cdp-2-c-methyl-d-erythritol 2-phosphate"\']']
198	BINDING	2	nadh	6	[u'[\'/note="nadh"\']', u'[\'/note="nadh"\', \'/note="nadph"\']']
199	BINDING	2	platensimycin	6	[u'[\'/note="platensimycin; inhibitor"\', \'/note="platencin; inhibitor"\']', u'[\'/note="platensimycin; inhibitor"\']']
200	BINDING	2	5,10-methylenetetrahydrofolate	6	[u'[\'/note="5,10-methylenetetrahydrofolate"\']', u'[\'/note="5,10-methylenetetrahydrofolate; via carbonyl oxygen"\']']
201	BINDING	2	via pros nitrogen	6	[u'[\'/note="heme; covalent, via pros nitrogen"\']', u'[\'/note="menaquinone; via pros nitrogen"\']']
202	BINDING	2	allantoate	6	[u'[\'/note="allantoate"\']', u'[\'/note="allantoate; via carbonyl oxygen"\']']
203	BINDING	2	tryptophan	6	[u'[\'/note="tryptophan"\']', u'[\'/note="l-tryptophan" hamap-rule:mf_00140"\']']
204	BINDING	3	other	6	[u'[\'/note="nadphx 1; for epimerase activity"\']', u'[\'/note="nadphx 2; for dehydratase activity"\']', u'[\'/note="dump"\']']
205	BINDING	1	fructose-1,6-bisphosphate	4	[u'[\'/note="fructose-1,6-bisphosphate"\']']
206	BINDING	1	asparagine	4	[u'[\'/note="l-asparagine 2; allosteric activator l-asparagine"\']']
207	BINDING	1	diphosphate	4	[u'[\'/note="diphosphate"\']']
208	BINDING	2	mrna	4	[u'[\'/note="mrna; binds mrna operator"\', \'/note="trna; binds anticodon region of trna"\']', u'[\'/note="mrna; binds mrna operator"\']']
209	BINDING	1	platencin	4	[u'[\'/note="platensimycin; inhibitor"\', \'/note="platencin; inhibitor"\']']
210	BINDING	2	pantoate	4	[u'[\'/note="pantoate"\', \'/note="beta-alanine"\']', u'[\'/note="pantoate"\']']
211	BINDING	1	orotate	4	[u'[\'/note="orotate" hamap-rule:mf_01208"\']']
212	BINDING	1	serine	4	[u'[\'/note="serine"\']']
213	BINDING	1	xylose	4	[u'[\'/note="beta-d-xylose"\']']
214	BINDING	1	tetrahydrodipicolinate	4	[u'[\'/note="(s)-2,3,4,5-tetrahydrodipicolinate"\']']
215	BINDING	1	2-hydroxy-3-oxopropionate reductase	4	[u'[\'/note="nad" hamap-rule:mf_02032"\']']
216	BINDING	1	ferrichrome	4	[u'[\'/note="ferrichrome"\']']
217	BINDING	2	meso-diaminopimelate	3	[u'[\'/note="meso-diaminopimelate"\']', u'[\'/note="meso-diaminopimelate; via carbonyl oxygen"\']']
218	BINDING	1	via pi-pi stacking	3	[u'[\'/note="ethanolamine 1; via pi-pi stacking"\']']
219	BINDING	1	putrescine	3	[u'[\'/note="putrescine"\']']
220	BINDING	1	galactofuranose	3	[u'[\'/note="beta-d-galactofuranose"\']']
221	BINDING	1	lumazine	3	[u'[\'/note="lumazine 2"\']']
222	BINDING	2	via tele nitrogen	3	[u'[\'/note="substrate; via tele nitrogen"\']', u'[\'/note="substrate; via tele nitrogen" hamap-rule:mf_00575"\']']
223	BINDING	1	ammonium	3	[u'[\'/note="ammonium"\']']
224	BINDING	1	hmp-pp	3	[u'[\'/note="hmp-pp"\']']
225	BINDING	1	4-dimethylaminopyridine	2	[u'[\'/note="dmap" hamap-rule:mf_01984"\']']
226	BINDING	1	biotin	2	[u'[\'/note="biotin" hamap-rule:mf_00978,\']']
227	BINDING	1	rhamnose	2	[u'[\'/note="dtdp-beta-l-rhamnose; via amide nitrogen"\']']
228	BINDING	1	methylpyrimidine	2	[u'[\'/note="4-amino-5-hydroxymethyl-2-methylpyrimidine"\']']
229	BINDING	1	pyrroloquinoline quinone	2	[u'[\'/note="pqq"\']']
230	BINDING	2	malate	2	[u'[\'/note="(r)-malate; via amide nitrogen and carbonyl oxygen"\']', u'[\'/note="(r)-malate"\']']
231	BINDING	1	folate	2	[u'[\'/note="folate"\']']
232	BINDING	1	nicotinamide riboside	2	[u'[\'/note="nicotinamide riboside"\']']
233	BINDING	1	ascorbate	2	[u'[\'/note="ascorbate"\']']
234	BINDING	2	succinate	2	[u'[\'/note="succinate"\']', u'[\'/note="succinate; via amide nitrogen"\']']
235	BINDING	1	phosphatidylglycerol	1	[u'[\'/note="phosphatidylglycerol" hamap-rule:mf_01147,\']']
236	BINDING	1	adenylate	1	[u'[\'/note="isoleucyl-adenylate"\']']
237	BINDING	1	succinyl-coa	1	[u'[\'/note="succinyl-coa; via amide nitrogen"\']']
238	BINDING	1	lipoate	1	[u'[\'/note="atp"\', \'/note="lipoate"\']']
239	CA_BIND	1	first part of site	9	[u'[\'/note="first part of site"\']']
240	CA_BIND	1	second part of site	2	[u'[\'/note="second part of site"\']']
241	COILED	10	coiled	7346	[u"['unknown']", u'[\'hamap-rule:mf_00599"\']', u'[\'hamap-rule:mf_01948"\']', u'[\'hamap-rule:mf_00843"\']', u'[\'hamap-rule:mf_02066"\']', u'[\'hamap-rule:mf_02021"\']', u'[\'hamap-rule:mf_00926"\']', u'[\'hamap-rule:mf_01304"\']', u'[\'hamap-rule:mf_02216"\']', u'[\'hamap-rule:mf_01839"\']']
242	COMPBIAS	1	polar residues	7142	[u'[\'/note="polar residues"\']']
243	COMPBIAS	2	acidic residues	5654	[u'[\'/note="basic and acidic residues"\']', u'[\'/note="acidic residues"\']']
244	COMPBIAS	1	basic and acidic residues	5499	[u'[\'/note="basic and acidic residues"\']']
245	COMPBIAS	1	pro residues	1128	[u'[\'/note="pro residues"\']']
246	COMPBIAS	1	basic residues	139	[u'[\'/note="basic residues"\']']
247	CONFLICT	1	llqtildevrsaklagmcpvqtdqhvlnvvshqlh -> vaanhs	840	[u'[\'/note="llqtildevrsaklagmcpvqtdqhvlnvvshqlh -> vaanhs (in ref. 1; aaa81671)"\']']
248	CONFLICT	1	seqlesahrsvvqtvrssfn -> astwkvpivascqrafcfs	500	[u'[\'/note="seqlesahrsvvqtvrssfn -> astwkvpivascqrafcfs (in ref. 1; caa24914)"\']']
249	CONFLICT	1	isdtsysgsktrgaagtq -> fltpliavrkpcaavp	450	[u'[\'/note="isdtsysgsktrgaagtq -> fltpliavrkpcaavp (in ref. 1; caa24914)"\']']
250	CONFLICT	1	rrlrgkdispcrllfldeaarldarsiatlfelcerlqmqliiaapenispe kgttyklvrkvfqntehvhvvglrgfapqlpetlpgtdeapsqas -> aacavkisll aaccssmkqrdwmlvlsprclncvsvckcnsssqrrkisarrkappinwcvkssripnt fmssacedlrrnslkrfqeltkrllrrvkikqqcrlfffrklrfctkkvahygalffkl lyirlcknvrrlytedkpde	388	[u'[\'/note="rrlrgkdispcrllfldeaarldarsiatlfelcerlqmqliiaapenispe kgttyklvrkvfqntehvhvvglrgfapqlpetlpgtdeapsqas -> aacavkisll aaccssmkqrdwmlvlsprclncvsvckcnsssqrrkisarrkappinwcvkssripnt fmssacedlrrnslkrfqeltkrllrrvkikqqcrlfffrklrfctkkvahygalffkl lyirlcknvrrlytedkpde (in ref. 1; caa40776)"\']']
251	CONFLICT	50	missing	378	[u'[\'/note="missing (in ref. 1; caa24740)"\']', u'[\'/note="missing (in ref. 1; caa48366)"\']', u'[\'/note="missing (in ref. 3; aaa67646)"\']', u'[\'/note="missing (in ref. 1; aa sequence)"\']', u'[\'/note="missing (in ref. 3; caa23673)"\']', u'[\'/note="missing (in ref. 4; aaa87982)"\']', u'[\'/note="missing (in ref. 1; aaa62108)"\']', u'[\'/note="missing (in ref. 1; caa43001)"\']', u'[\'/note=…
252	CONFLICT	1	ditgglprvadlfearrpkepailaeisgivsfgketkgkrrlvi -> asp vvcralrtcskhvvrksrqswlksavsfpsvkkpkvnvvwls	360	[u'[\'/note="ditgglprvadlfearrpkepailaeisgivsfgketkgkrrlvi -> asp vvcralrtcskhvvrksrqswlksavsfpsvkkpkvnvvwls (in ref. 11; no nucleotide entry)"\']']
253	CONFLICT	1	nrfafyeraqkafaivitgerakygnillkkgvtp -> ivlrfmngrkkpl rslsqanerstgiff	350	[u'[\'/note="nrfafyeraqkafaivitgerakygnillkkgvtp -> ivlrfmngrkkpl rslsqanerstgiff (in ref. 1; caa33129)"\']']
254	CONFLICT	1	qirqaqdghlptl -> kfarrrmvtyrlw	325	[u'[\'/note="qirqaqdghlptl -> kfarrrmvtyrlw (in ref. 1; caa24914)"\']']
255	CONFLICT	3	pkeakekaeaelqklkmmspmsaeatvvrgyidwmvqvpwnarskvkkdlrq aq -> rkrqkrkrtgvaeaendvsdvgrsdrsawlyrldgtgavecayegqkrpasga	324	[u'[\'/note="pkeakekaeaelqklkmmspmsaeatvvrgyidwmvqvpwnarskvkkdlrq aq -> rkrqkrkrtgvaeaendvsdvgrsdrsawlyrldgtgavecayegqkrpasga (in ref. 5; aaa24078)"\']', u'[\'/note="a -> r (in ref. 4; aaa16837)"\', \'/note="pkeakekaeaelqklkmmspmsaeatvvrgyidwmvqvpwnarskvkkdlrq aq -> rkrqkrkrtgvaeaendvsdvgrsdrsawlyrldgtgavecayegqkrpasga (in ref. 5; aaa24078)"\']', u'[\'/note="s -> t (in ref. 4; aaa16837)"\', \'/no…
256	CONFLICT	1	tilkrltikkniilqgppgvgktfvar -> sdtqtinhqkkyyppgaarrw knlcct	324	[u'[\'/note="tilkrltikkniilqgppgvgktfvar -> sdtqtinhqkkyyppgaarrw knlcct (in ref. 2; aaa24142)"\']']
257	CONFLICT	1	staagflshfvenyqqgwlhidcsatyrkapveqwsagatglgvrtianllt a -> trrrascrtllrtiskagcistarrltvkrrlnsglralrdlvcar	318	[u'[\'/note="staagflshfvenyqqgwlhidcsatyrkapveqwsagatglgvrtianllt a -> trrrascrtllrtiskagcistarrltvkrrlnsglralrdlvcar (in ref. 1; baa12689)"\']']
258	CONFLICT	1	gavgdilgyffdakgdvvtnikihneliglplsalktipvrvgvaggenkae aiaaamkggyinalvtdqdtaaailrs -> rggwrhfrllf	316	[u'[\'/note="gavgdilgyffdakgdvvtnikihneliglplsalktipvrvgvaggenkae aiaaamkggyinalvtdqdtaaailrs -> rggwrhfrllf (in ref. 1)"\']']
259	CONFLICT	1	tlynakqelana -> sctaqaragnp	300	[u'[\'/note="tlynakqelana -> sctaqaragnp (in ref. 1; caa24914)"\']']
260	CONFLICT	98	a -> r	237	[u'[\'/note="a -> r (in ref. 7; caa48363)"\']', u'[\'/note="a -> r (in ref. 6; aaa53584)"\']', u'[\'/note="a -> r (in ref. 1; caa48365)"\']', u'[\'/note="a -> r (in ref. 1 and 2)"\']', u'[\'/note="a -> r (in ref. 4; k02672)"\']', u'[\'/note="a -> r (in ref. 1; aaa23524)"\']', u'[\'/note="a -> r (in ref. 1; caa43318)"\']', u'[\'/note="a -> r (in ref. 4; caa47818)"\']', u'[\'/note="a -> r (in ref. …
261	CONFLICT	2	amfeettlslndlvlpifveeeid -> vclkrqhlslttwccrsllkkklt	192	[u'[\'/note="ra -> pr (in ref. 1; aaa62629)"\', \'/note="amfeettlslndlvlpifveeeid -> vclkrqhlslttwccrsllkkklt (in ref. 2; caa35467)"\']', u'[\'/note="amfeettlslndlvlpifveeeid -> vclkrqhlslttwccrsllkkklt (in ref. 2; caa35467)"\']']
262	CONFLICT	55	l -> v	191	[u'[\'/note="l -> v (in ref. 1; aac43518)"\']', u'[\'/note="l -> v (in ref. 4; caa47818 and 5; aaa23443)"\']', u'[\'/note="l -> v (in ref. 4; l20873)"\']', u'[\'/note="l -> v (in ref. 1; baa14326)"\']', u'[\'/note="l -> v (in ref. 1; aab18249)"\']', u'[\'/note="l -> v (in ref. 1; caa50735)"\']', u'[\'/note="l -> v (in ref. 1)"\']', u'[\'/note="l -> v (in ref. 3; caa35476)"\']', u'[\'/note="l -> v…
263	CONFLICT	1	slgviramerkgvrlsvfkpiaqprtggdap -> awrdpcngtqrrsserf qtyrsaayrwrca	186	[u'[\'/note="slgviramerkgvrlsvfkpiaqprtggdap -> awrdpcngtqrrsserf qtyrsaayrwrca (in ref. 2; baa04663)"\']']
264	CONFLICT	1	gavaraanvgviiergnnlkenn -> asgaggecwrnh	184	[u'[\'/note="gavaraanvgviiergnnlkenn -> asgaggecwrnh (in ref. 1; l12966)"\']']
265	CONFLICT	1	gervlevrgeylpivelw -> asgcwkcgvnicpssncg	180	[u'[\'/note="gervlevrgeylpivelw -> asgcwkcgvnicpssncg (in ref. 5; aaa23564)"\']']
266	CONFLICT	1	yrpngvgfrrkdgif -> ivrmasasvkthi	180	[u'[\'/note="yrpngvgfrrkdgif -> ivrmasasvkthi (in ref. 2; aaa24142)"\']']
267	CONFLICT	1	iilihailihmymafwvkgsikgmiegkvsrrwakkhhprwyreiekaeakk eseegi -> yhpdprhpdpyvygilgerid	174	[u'[\'/note="iilihailihmymafwvkgsikgmiegkvsrrwakkhhprwyreiekaeakk eseegi -> yhpdprhpdpyvygilgerid (in ref. 1)"\']']
268	CONFLICT	1	hlplptylvvqvrgeahdqeftihcqvs -> psaaadlsgspgtwskrtir nllstarsv	168	[u'[\'/note="hlplptylvvqvrgeahdqeftihcqvs -> psaaadlsgspgtwskrtir nllstarsv (in ref. 2; caa26504)"\']']
269	CONFLICT	1	aalririqasdvslvlqppqqtsirnvlrakvvnsyddngqvevelevggkt lwarispwardelaikpglwlyaqiksvsita -> lryyphsgfrcfswfynrrskpa fvtiagksc	168	[u'[\'/note="aalririqasdvslvlqppqqtsirnvlrakvvnsyddngqvevelevggkt lwarispwardelaikpglwlyaqiksvsita -> lryyphsgfrcfswfynrrskpa fvtiagksc (in ref. 3; aaa83840/aab00837)"\']']
270	CONFLICT	1	aykqav -> rytqaa	150	[u'[\'/note="aykqav -> rytqaa (in ref. 1; caa24914)"\']']
271	CONFLICT	1	agvrglereisklcrkavkqllldk -> racvvwsvkspncvakrlssycs it	150	[u'[\'/note="agvrglereisklcrkavkqllldk -> racvvwsvkspncvakrlssycs it (in ref. 5; aaa24078)"\']']
272	CONFLICT	1	fdqpdykkvidemrselakvshe -> ltsqttkkstmkcavnwqr	138	[u'[\'/note="fdqpdykkvidemrselakvshe -> ltsqttkkstmkcavnwqr (in ref. 1; caa79663)"\']']
273	CONFLICT	1	sndceviarkrfrevdavlswlleyapsrltgtgacvfaefdtesearqvle qapewlngfvakganls -> tqaygrantkgapfrrtavkcrslgklllecagkcllr veavlqrdvqnrtrsqa	138	[u'[\'/note="sndceviarkrfrevdavlswlleyapsrltgtgacvfaefdtesearqvle qapewlngfvakganls -> tqaygrantkgapfrrtavkcrslgklllecagkcllr veavlqrdvqnrtrsqa (in ref. 1; baa01106)"\']']
274	CONFLICT	1	galvtngqttelatvqqldpiy -> allslmgkrlnwrlssssilst	132	[u'[\'/note="galvtngqttelatvqqldpiy -> allslmgkrlnwrlssssilst (in ref. 2)"\']']
275	CONFLICT	50	a -> g	127	[u'[\'/note="a -> g (in ref. 1; aaa24004)"\']', u'[\'/note="a -> g (in ref. 2; aaa23752)"\']', u'[\'/note="a -> g (in ref. 2; aaa24007)"\']', u'[\'/note="a -> g (in ref. 1; aaa23524)"\']', u'[\'/note="a -> g (in ref. 1; aaa24550)"\']', u'[\'/note="a -> g (in ref. 3; aaa24024)"\']', u'[\'/note="a -> g (in ref. 3; aaa67601)"\']', u'[\'/note="a -> g (in ref. 1; caa27813)"\']', u'[\'/note="a -> g (in…
276	CONFLICT	1	igfgatv -> hwcwrsg	126	[u'[\'/note="igfgatv -> hwcwrsg (in ref. 2; caa80816)"\']']
277	CONFLICT	1	fasrrrddlvpemtlqanhelltltlpqgwltqhplgkeiiaqesqwqsyvh wplevh -> vgqpsp	116	[u'[\'/note="fasrrrddlvpemtlqanhelltltlpqgwltqhplgkeiiaqesqwqsyvh wplevh -> vgqpsp (in ref. 1; aab59049)"\']']
278	CONFLICT	31	r -> a	116	[u'[\'/note="r -> a (in ref. 1; aaa23732)"\']', u'[\'/note="r -> a (in ref. 1; caa68548)"\']', u'[\'/note="r -> a (in ref. 1; caa39634)"\']', u'[\'/note="r -> a (in ref. 2; caa23564 and 4; aaa51469)"\']', u'[\'/note="r -> a (in ref. 1; caa23562/aaa51468)"\']', u'[\'/note="r -> a (in ref. 3; u01233)"\']', u'[\'/note="r -> a (in ref. 2; aab47972)"\']', u'[\'/note="r -> a (in ref. 1; caa51663)"\']',…
279	CONFLICT	1	daag -> galq	112	[u'[\'/note="daag -> galq (in ref. 5; caa30739)"\']']
280	CONFLICT	1	pqrvnmvqf -> rtkygsv	108	[u'[\'/note="pqrvnmvqf -> rtkygsv (in ref. 2; aaa24142)"\']']
281	CONFLICT	1	qggspitwlliqvfspqnipgfiiigaiyltgifmtwrrargfikqekvvla e -> tgrfshylvtdsgfspqifpvsllsaqfi	106	[u'[\'/note="qggspitwlliqvfspqnipgfiiigaiyltgifmtwrrargfikqekvvla e -> tgrfshylvtdsgfspqifpvsllsaqfi (in ref. 1; caa56230)"\']']
282	CONFLICT	1	lriatfggvqpa -> fvshlwrraps	96	[u'[\'/note="lriatfggvqpa -> fvshlwrraps (in ref. 1; aaa75241)"\']']
283	CONFLICT	1	wlraesgalstgeaigtgmsilvm -> ccaqslvhcrpvrrwyryvdsgv	96	[u'[\'/note="wlraesgalstgeaigtgmsilvm -> ccaqslvhcrpvrrwyryvdsgv (in ref. 1; caa40776)"\']']
284	CONFLICT	1	stiyllmq -> rhlpvnavislnpflktgrgspynl	96	[u'[\'/note="stiyllmq -> rhlpvnavislnpflktgrgspynl (in ref. 1; aaa23994/caa30997)"\']']
285	CONFLICT	19	d -> n	95	[u'[\'/note="d -> n (in ref. 1; aa sequence)"\']', u'[\'/note="d -> n (in ref. 1; caa23660/aaa83914)"\']', u'[\'/note="d -> n (in ref. 1; caa38872)"\']', u'[\'/note="d -> n (in ref. 6; aa sequence)"\']', u'[\'/note="d -> n (in ref. 1; aaa62629)"\']', u'[\'/note="d -> n (in ref. 1; caa25253)"\']', u'[\'/note="d -> n (in ref. 4; aa sequence)"\']', u'[\'/note="d -> n (in ref. 2)"\']', u'[\'/note="d …
286	CONFLICT	40	g -> a	94	[u'[\'/note="g -> a (in ref. 1; aac36870)"\']', u'[\'/note="g -> a (in ref. 5)"\']', u'[\'/note="g -> a (in ref. 4; aaa89201)"\']', u'[\'/note="g -> a (in ref. 1; aaa23513)"\']', u'[\'/note="g -> a (in ref. 1; caa27813)"\']', u'[\'/note="g -> a (in ref. 7; aac36909)"\']', u'[\'/note="g -> a (in ref. 1; aaa97201)"\']', u'[\'/note="g -> a (in ref. 4; baa04487)"\']', u'[\'/note="g -> a (in ref. 1)"\…
287	CONFLICT	1	pgilsiqpsywqvfalamaiaiiipivltsfiyqrkyrlgtldiv -> rns ldstellagvcagngyrhhhpdcthlvylsaeippghaghcliffgaqlrshsqe	90	[u'[\'/note="pgilsiqpsywqvfalamaiaiiipivltsfiyqrkyrlgtldiv -> rns ldstellagvcagngyrhhhpdcthlvylsaeippghaghcliffgaqlrshsqe (in ref. 1; aac43381)"\']']
288	CONFLICT	1	laahqqpcefklypgtlhaflhysrmmktadealrdgaqfftaql -> vsc asaal	90	[u'[\'/note="laahqqpcefklypgtlhaflhysrmmktadealrdgaqfftaql -> vsc asaal (in ref. 2; baa14305)"\']']
289	CONFLICT	37	s -> t	87	[u'[\'/note="s -> t (in ref. 2; aac43130)"\']', u'[\'/note="s -> t (in ref. 3; cab40810 and 4; aaa67642)"\']', u'[\'/note="s -> t (in ref. 1; caa48366)"\']', u'[\'/note="s -> t (in ref. 1; caa23664/aaa57299, 3; caa23673 and 4; aab60033)"\']', u'[\'/note="s -> t (in ref. 4; aaa73004)"\']', u'[\'/note="s -> t (in ref. 1, 2 and 3; aaa57877)"\']', u'[\'/note="s -> t (in ref. 1 and 2)"\']', u'[\'/note…
290	CONFLICT	1	ritventielisiesikrcvaanigvsylprfavakelecgelielpfgeqs qtitamcahhagkavspamhtfiqcveesfvag -> dhggkhh	85	[u'[\'/note="ritventielisiesikrcvaanigvsylprfavakelecgelielpfgeqs qtitamcahhagkavspamhtfiqcveesfvag -> dhggkhh (in ref. 1; d13169 and 2; d64044)"\']']
291	CONFLICT	24	e -> q	85	[u'[\'/note="e -> q (in ref. 4; aa sequence)"\']', u'[\'/note="e -> q (in ref. 1; aa sequence)"\']', u'[\'/note="e -> q (in ref. 5; aaa23436)"\']', u'[\'/note="e -> q (in ref. 1; caa32451)"\']', u'[\'/note="e -> q (in ref. 3; aaa67625)"\']', u'[\'/note="e -> q (in ref. 1; aaa24474 and 6; aa sequence)"\']', u'[\'/note="e -> q (in ref. 6; aa sequence)"\']', u'[\'/note="e -> q (in ref. 6; aaa23717)"…
292	CONFLICT	1	iahaser -> sltlprl	84	[u'[\'/note="iahaser -> sltlprl (in ref. 5; aac28948)"\']']
293	CONFLICT	1	ialhmgiqaqcyavpspkdmlsvrirefaarfgaladlyifkreprflgplv pipamhqvpedaqgypavtpeqllelqkkqgk -> mrciwdsgsvlcrtvteryavst ys	84	[u'[\'/note="ialhmgiqaqcyavpspkdmlsvrirefaarfgaladlyifkreprflgplv pipamhqvpedaqgypavtpeqllelqkkqgk -> mrciwdsgsvlcrtvteryavst ys (in ref. 1)"\']']
294	CONFLICT	1	lvftgdyfldeqglptakstavfnmfkhlahvlsekyhlvd -> rylpatt f	82	[u'[\'/note="lvftgdyfldeqglptakstavfnmfkhlahvlsekyhlvd -> rylpatt f (in ref. 1)"\']']
295	CONFLICT	8	ql -> hv	82	[u'[\'/note="ql -> hv (in ref. 1 and 2)"\']', u'[\'/note="ql -> hv (in ref. 1; caa43318)"\']', u'[\'/note="ql -> hv (in ref. 1; caa24914)"\']', u'[\'/note="ql -> hv (in ref. 1; aaa23639)"\']', u'[\'/note="ql -> hv (in ref. 1; caa43001)"\']', u'[\'/note="ql -> hv (in ref. 1; aaa92015)"\']', u'[\'/note="ql -> hv (in ref. 2; aaa23710)"\']', u'[\'/note="ql -> hv (in ref. 2)"\']']
296	CONFLICT	1	mvsgalvpsgttntasvhvl -> ygfwctgterhy	80	[u'[\'/note="mvsgalvpsgttntasvhvl -> ygfwctgterhy (in ref. 1; aaa24392)"\']']
297	CONFLICT	1	sermhliyevvefvgrwsmidvfviavlsalvrmgglmsiypamgalmfalv vimtmfsamtfdprlswdrqpesehees -> rkeci	80	[u'[\'/note="sermhliyevvefvgrwsmidvfviavlsalvrmgglmsiypamgalmfalv vimtmfsamtfdprlswdrqpesehees -> rkeci (in ref. 1; caa57256)"\']']
298	CONFLICT	24	r -> p	80	[u'[\'/note="r -> p (in ref. 1; aaa24004)"\']', u'[\'/note="r -> p (in ref. 1; aaa23573/aaa23574)"\']', u'[\'/note="r -> p (in ref. 1 and 2)"\']', u'[\'/note="r -> p (in ref. 1; aaa23463)"\']', u'[\'/note="r -> p (in ref. 2; aaa23716)"\']', u'[\'/note="r -> p (in ref. 2; aab00467)"\']', u'[\'/note="r -> p (in ref. 1; aaa62629)"\']', u'[\'/note="r -> p (in ref. 2; caa35467)"\']', u'[\'/note="r -> …
299	CONFLICT	1	pwedcq -> hgriandfrfaatt	72	[u'[\'/note="pwedcq -> hgriandfrfaatt (in ref. 2)"\']']
300	CONFLICT	1	pyngrkeikgqa -> rttvvkrskarhktdfi	72	[u'[\'/note="pyngrkeikgqa -> rttvvkrskarhktdfi (in ref. 1; caa57795)"\']']
301	CONFLICT	1	mkiailsrdgtlysckrl -> mersirvsgw	72	[u'[\'/note="mkiailsrdgtlysckrl -> mersirvsgw (in ref. 1; caa33868)"\']']
302	CONFLICT	11	h -> r	72	[u'[\'/note="h -> r (in ref. 7; aaa03347)"\']', u'[\'/note="h -> r (in ref. 1; baa14029)"\']', u'[\'/note="h -> r (in ref. 1; caa23560)"\']', u'[\'/note="h -> r (in ref. 1; caa27314)"\']', u'[\'/note="h -> r (in ref. 1; aaa23567)"\']', u'[\'/note="h -> r (in ref. 5)"\']', u'[\'/note="h -> r (in ref. 5; baa00645)"\']', u'[\'/note="h -> r (in ref. 3; caa66106)"\']', u'[\'/note="h -> r (in ref. 2; a…
303	CONFLICT	1	aldtlgfdflrdvapgea -> gsirwaliscvtsrrar	72	[u'[\'/note="aldtlgfdflrdvapgea -> gsirwaliscvtsrrar (in ref. 2 and 3)"\']']
304	CONFLICT	30	a -> p	71	[u'[\'/note="a -> p (in ref. 1; caa34435)"\']', u'[\'/note="a -> p (in ref. 1; caa43002)"\']', u'[\'/note="a -> p (in ref. 2; baa08441)"\']', u'[\'/note="a -> p (in ref. 1; aaa24106)"\']', u'[\'/note="a -> p (in ref. 4)"\']', u'[\'/note="a -> p (in ref. 1; caa51660)"\']', u'[\'/note="a -> p (in ref. 4; aaa23971)"\']', u'[\'/note="a -> p (in ref. 3; caa32595 and 4; aaa24663)"\']', u'[\'/note="a ->…
305	CONFLICT	11	q -> h	70	[u'[\'/note="q -> h (in ref. 5; aaa23443)"\']', u'[\'/note="q -> h (in ref. 1; baa14029)"\']', u'[\'/note="q -> h (in ref. 5)"\']', u'[\'/note="q -> h (in ref. 1; caa23672 and 2; caa23665)"\']', u'[\'/note="q -> h (in ref. 5; aaa03208)"\']', u'[\'/note="q -> h (in ref. 1; aaa19938)"\']', u'[\'/note="q -> h (in ref. 1; caa47260 and 5; x52890)"\']', u'[\'/note="q -> h (in ref. 1; baa13052)"\']', u'…
306	CONFLICT	1	ghrarnsklclemglgqekrrddgipgitnyifsetaargmyqrwadllsse swqevldktaayqqevmk -> atapatancvwkwglvrksaattaflalltisfqklp lvectnagpif	70	[u'[\'/note="ghrarnsklclemglgqekrrddgipgitnyifsetaargmyqrwadllsse swqevldktaayqqevmk -> atapatancvwkwglvrksaattaflalltisfqklp lvectnagpif (in ref. 1; caa86018)"\']']
307	CONFLICT	1	fgamhnaifvaptlyaydfyadktvveigrvenvmeeyhaifaermiqhpav qricntdysalfspavr -> wlqvllvamqmqsslpqrfmhmtfmpikls	69	[u'[\'/note="fgamhnaifvaptlyaydfyadktvveigrvenvmeeyhaifaermiqhpav qricntdysalfspavr -> wlqvllvamqmqsslpqrfmhmtfmpikls (in ref. 1 and 3)"\']']
308	CONFLICT	1	laasmypdqslypansv -> wrpacirisrsirqtrc	68	[u'[\'/note="laasmypdqslypansv -> wrpacirisrsirqtrc (in ref. 3; caa30416)"\']']
309	CONFLICT	19	v -> a	68	[u'[\'/note="v -> a (in ref. 5; aaa23564)"\']', u'[\'/note="v -> a (in ref. 1; caa29154)"\']', u'[\'/note="v -> a (in ref. 4; aat42474)"\']', u'[\'/note="v -> a (in ref. 6; aap43521)"\']', u'[\'/note="v -> a (in ref. 1; aaa81671)"\']', u'[\'/note="v -> a (in ref. 1; caa31811)"\']', u'[\'/note="v -> a (in ref. 1; aaa19938)"\']', u'[\'/note="v -> a (in ref. 6; x69109)"\']', u'[\'/note="v -> a (in r…
310	CONFLICT	16	el -> dv	68	[u'[\'/note="el -> dv (in ref. 2; aab03036)"\']', u'[\'/note="el -> dv (in ref. 1; no nucleotide entry and 2; aac77843)"\']', u'[\'/note="el -> dv (in ref. 5)"\']', u'[\'/note="el -> dv (in ref. 1; aaa23890/caa30398, 2; aac28166 and 3; aaa58222)"\']', u'[\'/note="el -> dv (in ref. 1)"\']', u'[\'/note="el -> dv (in ref. 5; caa29031)"\']', u'[\'/note="el -> dv (in ref. 1; caa52094)"\']', u'[\'/note…
311	CONFLICT	1	davkialtatpalhtvqifgepvyrytyrtavidgflidqdppiqiitrnaq egvylskgeqverisp -> ecgknrshrhpgatycadfrraglplylpyrgyrrfsdr pgsaysdhhpqraggglslqrragrah	68	[u'[\'/note="davkialtatpalhtvqifgepvyrytyrtavidgflidqdppiqiitrnaq egvylskgeqverisp -> ecgknrshrhpgatycadfrraglplylpyrgyrrfsdr pgsaysdhhpqraggglslqrragrah (in ref. 1; caa29791)"\']']
312	CONFLICT	19	p -> r	67	[u'[\'/note="p -> r (in ref. 1; caa24740)"\']', u'[\'/note="p -> r (in ref. 4; caa47818)"\']', u'[\'/note="p -> r (in ref. 1; caa38413)"\']', u'[\'/note="p -> r (in ref. 6; aaa23641)"\']', u'[\'/note="p -> r (in ref. 1; caa53168)"\']', u'[\'/note="p -> r (in ref. 1; caa29156)"\']', u'[\'/note="p -> r (in ref. 2; aaa97510)"\']', u'[\'/note="p -> r (in ref. 3; aaa97142)"\']', u'[\'/note="p -> r (in…
313	CONFLICT	1	mfefyiaareqketghpgifsrqkhstiiyvicllliclwfagmvlvggyar qlwvlwivkaevtv -> mtdlpvvcrngagwwvcqaamgaldsksrshl	66	[u'[\'/note="mfefyiaareqketghpgifsrqkhstiiyvicllliclwfagmvlvggyar qlwvlwivkaevtv -> mtdlpvvcrngagwwvcqaamgaldsksrshl (in ref. 1; v00344)"\']']
314	CONFLICT	1	tiaivigthgwaaeqllktaem -> gwgcragclkrqkw	66	[u'[\'/note="tiaivigthgwaaeqllktaem -> gwgcragclkrqkw (in ref. 1; aaa24110)"\']']
315	CONFLICT	17	q -> e	64	[u'[\'/note="q -> e (in ref. 1; aa sequence)"\']', u'[\'/note="q -> e (in ref. 8; aa sequence)"\']', u'[\'/note="q -> e (in ref. 2; aaa24476)"\']', u'[\'/note="q -> e (in ref. 1; aaa81671)"\']', u'[\'/note="q -> e (in ref. 1; caa52095)"\']', u'[\'/note="q -> e (in ref. 1; aaa62791)"\']', u'[\'/note="q -> e (in ref. 4; aa sequence and 5; aa sequence)"\']', u'[\'/note="q -> e (in ref. 1; caa60102)"…
316	CONFLICT	1	gkaraeygeqrqycpvcgsmpvssmvqigttq -> akpalntasnvniarf vvlcrcpawcklaplr	64	[u'[\'/note="gkaraeygeqrqycpvcgsmpvssmvqigttq -> akpalntasnvniarf vvlcrcpawcklaplr (in ref. 1; caa34149)"\']']
317	CONFLICT	21	v -> l	64	[u'[\'/note="v -> l (in ref. 2; caa37982)"\']', u'[\'/note="v -> l (in ref. 1; aaa23667)"\']', u'[\'/note="v -> l (in ref. 2; aaa23770)"\']', u'[\'/note="v -> l (in ref. 1; caa23660/aaa83914)"\']', u'[\'/note="v -> l (in ref. 2; aaa67580)"\']', u'[\'/note="v -> l (in ref. 1; aaa85770)"\']', u'[\'/note="v -> l (in ref. 1; caa68511)"\']', u'[\'/note="v -> l (in ref. 3; caa32595 and 4; aaa24663)"\']…
318	CONFLICT	1	tssvtaltgsteesqf -> dvfshradrlh	64	[u'[\'/note="tssvtaltgsteesqf -> dvfshradrlh (in ref. 4)"\']']
319	CONFLICT	1	lfenlffs -> csrtcsspt	64	[u'[\'/note="lfenlffs -> csrtcsspt (in ref. 6; caa23629)"\']']
320	CONFLICT	9	n -> k	62	[u'[\'/note="n -> k (in ref. 1; caa57795/aaa24486)"\']', u'[\'/note="n -> k (in ref. 4; caa47818)"\']', u'[\'/note="n -> k (in ref. 1; caa24914)"\']', u'[\'/note="n -> k (in ref. 1; aaa23904)"\']', u'[\'/note="n -> k (in ref. 4; caa51730)"\']', u'[\'/note="n -> k (in ref. 1; caa23670 and 2; caa79669)"\']', u'[\'/note="n -> k (in ref. 1; aaa23728)"\']', u'[\'/note="n -> k (in ref. 5; m31532)"\']',…
321	CONFLICT	1	cirslehayskdgglavlygnfaengcivk -> vsarwntptaktaawrcs tvilrkrlhre	60	[u'[\'/note="cirslehayskdgglavlygnfaengcivk -> vsarwntptaktaawrcs tvilrkrlhre (in ref. 2; aaa24023)"\']']
322	CONFLICT	1	aytfallnhyyglgfwtclpiaglmaaaa -> lhfcaaqsllrlglldlpa dcwingsgg	58	[u'[\'/note="aytfallnhyyglgfwtclpiaglmaaaa -> lhfcaaqsllrlglldlpa dcwingsgg (in ref. 1; aaa83885)"\']']
323	CONFLICT	10	q -> r	57	[u'[\'/note="q -> r (in ref. 1; caa23664/aaa57299 and 3; caa23673)"\']', u'[\'/note="q -> r (in ref. 1; aab02268)"\']', u'[\'/note="q -> r (in ref. 5; aaa03208)"\']', u'[\'/note="q -> r (in ref. 1; caa23585)"\']', u'[\'/note="q -> r (in ref. 1; caa60104)"\']', u'[\'/note="q -> r (in ref. 1; aaa23739)"\']', u'[\'/note="q -> r (in ref. 5)"\']', u'[\'/note="q -> r (in ref. 6; aaa23934)"\']', u'[\'/n…
324	CONFLICT	1	gawdgqepitipvegiemgslsmlsvqi -> ryvgwaganyhs	56	[u'[\'/note="gawdgqepitipvegiemgslsmlsvqi -> ryvgwaganyhs (in ref. 1; aaa71877)"\']']
325	CONFLICT	1	apllgeipwlaenpenaatgkyinlall -> rrcwerspglqkiqkmrqpe st	56	[u'[\'/note="apllgeipwlaenpenaatgkyinlall -> rrcwerspglqkiqkmrqpe st (in ref. 1; aaa23518)"\']']
326	CONFLICT	9	q -> l	56	[u'[\'/note="q -> l (in ref. 2; baa02747 and 6; baa21003)"\']', u'[\'/note="q -> l (in ref. 1; aaa23732)"\']', u'[\'/note="q -> l (in ref. 4; aat42473)"\']', u'[\'/note="q -> l (in ref. 1; caa23660/aaa83914)"\']', u'[\'/note="q -> l (in ref. 4; aaa81025)"\']', u'[\'/note="q -> l (in ref. 5; aaa03208)"\']', u'[\'/note="q -> l (in ref. 1 and 5)"\']', u'[\'/note="q -> l (in ref. 3)"\']', u'[\'/note=…
327	CONFLICT	1	lrkfdrqalhatmlrlyhpisgiemewhapipqdmvelievmradfeehkde vdwl -> agvsltarrymqpccvfitrspaskwngmrlfhkiwws	56	[u'[\'/note="lrkfdrqalhatmlrlyhpisgiemewhapipqdmvelievmradfeehkde vdwl -> agvsltarrymqpccvfitrspaskwngmrlfhkiwws (in ref. 2)"\']']
328	CONFLICT	10	n -> d	54	[u'[\'/note="n -> d (in ref. 6; aa sequence)"\']', u'[\'/note="n -> d (in ref. 4; aa sequence)"\']', u'[\'/note="n -> d (in ref. 4; aaa73004)"\']', u'[\'/note="n -> d (in ref. 5; aa sequence)"\']', u'[\'/note="n -> d (in ref. 1; aab59988)"\']', u'[\'/note="n -> d (in ref. 3)"\']', u'[\'/note="n -> d (in ref. 4; caa86019)"\']', u'[\'/note="n -> d (in ref. 5; aaa23875)"\']', u'[\'/note="n -> d (in …
329	CONFLICT	1	dffemmkrs -> evmtpty	54	[u'[\'/note="dffemmkrs -> evmtpty (in ref. 7; aaa68985)"\']']
330	CONFLICT	1	siphmlehf -> qhsahagal	54	[u'[\'/note="siphmlehf -> qhsahagal (in ref. 2; baa04663)"\']']
331	CONFLICT	14	c -> s	53	[u'[\'/note="c -> s (in ref. 1; x54687)"\']', u'[\'/note="c -> s (in ref. 1; aaa23897/caa25280)"\']', u'[\'/note="c -> s (in ref. 2; aaa97510)"\']', u'[\'/note="c -> s (in ref. 1; aab18547)"\']', u'[\'/note="c -> s (in ref. 2; baa11650)"\']', u'[\'/note="c -> s (in ref. 1; caa51045)"\']', u'[\'/note="c -> s (in ref. 1; baa02487)"\']', u'[\'/note="c -> s (in ref. 1; aa sequence)"\']', u'[\'/note="…
332	CONFLICT	1	lkslrridrsnvrektvrgqytagfa -> pevssphrplqrtrknrtraiy cvp	52	[u'[\'/note="lkslrridrsnvrektvrgqytagfa -> pevssphrplqrtrknrtraiy cvp (in ref. 1; aaa24775)"\']']
333	CONFLICT	12	kl -> nv	52	[u'[\'/note="kl -> nv (in ref. 1; caa25784)"\']', u'[\'/note="kl -> nv (in ref. 1; aaa24422)"\']', u'[\'/note="kl -> nv (in ref. 1; caa52095)"\']', u'[\'/note="kl -> nv (in ref. 1; aaa24409)"\']', u'[\'/note="kl -> nv (in ref. 1; aab18529)"\']', u'[\'/note="kl -> nv (in ref. 1; caa34807)"\']', u'[\'/note="kl -> nv (in ref. 1; aaa21590/aaa69162)"\']', u'[\'/note="kl -> nv (in ref. 3; l20253)"\']',…
334	CONFLICT	1	gecgldmelqratrgfhsphapdnhtfssneslwiskqndpnearaqlitlr -> vnvasiwnysvrragfiahtrpittpfpamnrygsvnktiltkrgrahhaa	52	[u'[\'/note="gecgldmelqratrgfhsphapdnhtfssneslwiskqndpnearaqlitlr -> vnvasiwnysvrragfiahtrpittpfpamnrygsvnktiltkrgrahhaa (in ref. 1; aaa62063)"\']']
335	CONFLICT	1	dgstqiftvpyssvpllqreghtrysitageyrsgnaqqektrffqstllh -> vlaarrflpypirtfpllnvkayslfhygrripyesrsrkkpafsrvhysn	51	[u'[\'/note="dgstqiftvpyssvpllqreghtrysitageyrsgnaqqektrffqstllh -> vlaarrflpypirtfpllnvkayslfhygrripyesrsrkkpafsrvhysn (in ref. 1)"\']']
336	CONFLICT	1	el -> gt	50	[u'[\'/note="el -> gt (in ref. 1; caa24914)"\']']
337	CONFLICT	1	prlrddsdgygprgrdfivhvdfpaevihawqtlkhdavlieamesrslr -> rvyamiamatvpageilsftlifrqkssmhgkr	50	[u'[\'/note="prlrddsdgygprgrdfivhvdfpaevihawqtlkhdavlieamesrslr -> rvyamiamatvpageilsftlifrqkssmhgkr (in ref. 1)"\']']
338	CONFLICT	9	s -> n	50	[u'[\'/note="s -> n (in ref. 3; aaa60532)"\']', u'[\'/note="s -> n (in ref. 2; caa30738)"\']', u'[\'/note="s -> n (in ref. 4; aaa81026)"\']', u'[\'/note="s -> n (in ref. 1; caa52096)"\']', u'[\'/note="s -> n (in ref. 2; x69109)"\']', u'[\'/note="s -> n (in ref. 2; caa71954)"\']', u'[\'/note="s -> n (in ref. 1 and 4)"\']', u'[\'/note="s -> n (in ref. 11; aa sequence)"\']', u'[\'/note="s -> n (in r…
339	CONFLICT	1	grrraeivagsehivpadavimafg -> asprgdrcrfrtyrtgrcgdhgv w	50	[u'[\'/note="grrraeivagsehivpadavimafg -> asprgdrcrfrtyrtgrcgdhgv w (in ref. 1; aaa23905)"\']']
340	CONFLICT	1	ggenymqfsdmyvttkgflpfapeadfwvgkhgapkieiqmldwktqrtd -> varticsspictlppkvscplaqrlisgwvntvrrklksrcltgkrsvlm	50	[u'[\'/note="ggenymqfsdmyvttkgflpfapeadfwvgkhgapkieiqmldwktqrtd -> varticsspictlppkvscplaqrlisgwvntvrrklksrcltgkrsvlm (in ref. 1; aaa62071)"\']']
341	CONFLICT	1	pyermlfdtwgnqiqtlcllplmsgdtmlgvlklaqceekvftttnlnll -> lrmsstpgatdsnlvpvtadvwrhhagraetganrresvyhyqseft	50	[u'[\'/note="pyermlfdtwgnqiqtlcllplmsgdtmlgvlklaqceekvftttnlnll -> lrmsstpgatdsnlvpvtadvwrhhagraetganrresvyhyqseft (in ref. 2; aaa23770)"\']']
342	CONFLICT	26	a -> t	49	[u'[\'/note="a -> t (in ref. 1; caa23565)"\']', u'[\'/note="a -> t (in ref. 1)"\']', u'[\'/note="a -> t (in ref. 1; caa50733)"\']', u'[\'/note="a -> t (in ref. 4; aaa81026)"\']', u'[\'/note="a -> t (in ref. 5; aaa56875)"\']', u'[\'/note="a -> t (in ref. 1; aaa24389)"\']', u'[\'/note="a -> t (in ref. 1; aab93856 and 2; aab40267)"\']', u'[\'/note="a -> t (in ref. 4; aaa81029)"\']', u'[\'/note="a ->…
343	CONFLICT	9	m -> i	49	[u'[\'/note="m -> i (in ref. 4; aat42454)"\']', u'[\'/note="m -> i (in ref. 1; aaa23998)"\']', u'[\'/note="m -> i (in ref. 1; aac32036)"\']', u'[\'/note="m -> i (in ref. 2; baa04501)"\']', u'[\'/note="m -> i (in ref. 1; caa30698)"\']', u'[\'/note="m -> i (in ref. 2; aaa24453)"\']', u'[\'/note="m -> i (in ref. 2; aa sequence)"\']', u'[\'/note="m -> i (in ref. 4; caa57686)"\']', u'[\'/note="m -> i …
344	CONFLICT	1	apwfsgvlrsisgnylmdwafhalcvvglmiitlrfapvrfpqlwvkea -> prgflaccvvsaait	49	[u'[\'/note="apwfsgvlrsisgnylmdwafhalcvvglmiitlrfapvrfpqlwvkea -> prgflaccvvsaait (in ref. 1)"\']']
345	CONFLICT	1	svaallvalfnlgiatliylpfvvvankaqnaidkeeseedianalkf -> tsphcwshsstlasqr	48	[u'[\'/note="svaallvalfnlgiatliylpfvvvankaqnaidkeeseedianalkf -> tsphcwshsstlasqr (in ref. 1; caa37070)"\']']
346	CONFLICT	1	qhgialnekliangkwtpasgaeg -> smvlrsmknlsltvngrlpagrr	48	[u'[\'/note="qhgialnekliangkwtpasgaeg -> smvlrsmknlsltvngrlpagrr (in ref. 1; aaa16428)"\']']
347	CONFLICT	1	miaqgtpaeimrgetlemiygipm -> sdcsgnacgnyarrnprndlwhpd	48	[u'[\'/note="miaqgtpaeimrgetlemiygipm -> sdcsgnacgnyarrnprndlwhpd (in ref. 1; aab61769 and 3; no nucleotide entry)"\']']
348	CONFLICT	1	mvlvggeittsa -> igfswrrnhhqrp	48	[u'[\'/note="mvlvggeittsa -> igfswrrnhhqrp (in ref. 1 and 5)"\']']
349	CONFLICT	1	laqpfrylahngeintitgnrqwa -> wrnrsaiwritvkstpspvtang	48	[u'[\'/note="laqpfrylahngeintitgnrqwa -> wrnrsaiwritvkstpspvtang (in ref. 1; aaa23904 and 4; aaa23906)"\']']
350	CONFLICT	1	payqpvlnakvggylnnlraanqafmmerrdhaggdgqtlnlrvigg -> l ltsrc	47	[u'[\'/note="payqpvlnakvggylnnlraanqafmmerrdhaggdgqtlnlrvigg -> l ltsrc (in ref. 5; aaa74094)"\']']
351	CONFLICT	19	a -> v	47	[u'[\'/note="a -> v (in ref. 1; caa23664/aaa57299 and 3; caa23673)"\']', u'[\'/note="a -> v (in ref. 1; aaa23463)"\']', u'[\'/note="a -> v (in ref. 1; caa50734)"\']', u'[\'/note="a -> v (in ref. 1; caa29154)"\']', u'[\'/note="a -> v (in ref. 1; aaa24474 and 6; aa sequence)"\']', u'[\'/note="a -> v (in ref. 1; aaa20198)"\']', u'[\'/note="a -> v (in ref. 1; aab20842)"\']', u'[\'/note="a -> v (in re…
352	CONFLICT	1	aqniaeaasgidklvsrvlvlae -> rrtlqkrraaliswfpacwfwlne	46	[u'[\'/note="aqniaeaasgidklvsrvlvlae -> rrtlqkrraaliswfpacwfwlne (in ref. 1; baa02487)"\']']
353	CONFLICT	1	hvpqadtapivgntftpskgygk -> qyrrpiprqswgiplphqkvtgnkr llweiltvslv	46	[u'[\'/note="hvpqadtapivgntftpskgygk -> qyrrpiprqswgiplphqkvtgnkr llweiltvslv (in ref. 1; aaa16395)"\']']
354	CONFLICT	1	pkyrsattthgrnmagaralwra -> vviwrvlvrcgp	46	[u'[\'/note="pkyrsattthgrnmagaralwra -> vviwrvlvrcgp (in ref. 2; aaa24023)"\']']
355	CONFLICT	1	pvgcielgevkfkkgekehpvtl -> rwvvlssgk	46	[u'[\'/note="pvgcielgevkfkkgekehpvtl -> rwvvlssgk (in ref. 3; m59444)"\']']
356	CONFLICT	20	t -> s	45	[u'[\'/note="t -> s (in ref. 1, 2 and 6)"\']', u'[\'/note="t -> s (in ref. 1 and 2)"\']', u'[\'/note="t -> s (in ref. 1; aaa24503)"\']', u'[\'/note="t -> s (in ref. 6)"\']', u'[\'/note="t -> s (in ref. 1)"\']', u'[\'/note="te -> rq (in ref. 2; aaa23493 and 6; caa27956)"\', \'/note="t -> s (in ref. 1; aaa23497)"\']', u'[\'/note="t -> s (in ref. 4; aaa81029)"\']', u'[\'/note="t -> s (in ref. 4)"\']…
357	CONFLICT	2	igfagprvieqtvre -> malpvrvlsnrpfak	45	[u'[\'/note="igfagprvieqtvre -> malpvrvlsnrpfak (in ref. 1; aaa23807/aaa23801)"\']', u'[\'/note="gfagprvieq -> alpvrvlsnr (in ref. 2; aaa23965)"\', \'/note="igfagprvieqtvre -> malpvrvlsnrpfak (in ref. 1; aaa23807/aaa23801)"\']']
358	CONFLICT	1	ldyqrspldyehyltrqlqpvaegilpfiednfatlmtgqlglf -> pglp tfttglrtlsdppattrgggntpfy	44	[u'[\'/note="ldyqrspldyehyltrqlqpvaegilpfiednfatlmtgqlglf -> pglp tfttglrtlsdppattrgggntpfy (in ref. 2; aaa24406/aaa24407)"\']']
359	CONFLICT	1	elyhypadrfvagfigspkmnf -> avplsgrpfcrriyrfakdel	44	[u'[\'/note="elyhypadrfvagfigspkmnf -> avplsgrpfcrriyrfakdel (in ref. 1; aab59057)"\']']
360	CONFLICT	1	thgagdipdnlspfyealqeqkpdlsavrfgaigigsreydtfc -> ptvp eifrttfllsmkhcrnrspiflqsalaqsvlavvnmtpfv	44	[u'[\'/note="thgagdipdnlspfyealqeqkpdlsavrfgaigigsreydtfc -> ptvp eifrttfllsmkhcrnrspiflqsalaqsvlavvnmtpfv (in ref. 3; aaa24247)"\']']
361	CONFLICT	1	gddlhietqnvappdsrielissseadwnalqsallklrlatta -> amtc tlkrktlrhrtavls	44	[u'[\'/note="gddlhietqnvappdsrielissseadwnalqsallklrlatta -> amtc tlkrktlrhrtavls (in ref. 1)"\']']
362	CONFLICT	1	mfgyatnetdv -> dvsatqlmkptc	44	[u'[\'/note="mfgyatnetdv -> dvsatqlmkptc (in ref. 1; aaa24164)"\']']
363	CONFLICT	1	lcmptdlprfyldladlrles -> cvcrricrvlsgscgpasgm	42	[u'[\'/note="lcmptdlprfyldladlrles -> cvcrricrvlsgscgpasgm (in ref. 1; aaa23904)"\']']
364	CONFLICT	1	pehnrv -> raqsg	42	[u'[\'/note="pehnrv -> raqsg (in ref. 1; caa49863)"\']']
365	CONFLICT	1	gvhincpfaeplygemddtgl -> esistarllnrcmakwtipgf	42	[u'[\'/note="gvhincpfaeplygemddtgl -> esistarllnrcmakwtipgf (in ref. 5; aaa24153)"\']']
366	CONFLICT	1	rfgagregdflllqkagmeygfditstqtfceggvrisstav -> plalvv kaiscyyrklawntasispvrklfaevacasaarl	42	[u'[\'/note="rfgagregdflllqkagmeygfditstqtfceggvrisstav -> plalvv kaiscyyrklawntasispvrklfaevacasaarl (in ref. 1; aaa24605 and 2; no nucleotide entry)"\']']
367	CONFLICT	1	avaakqsslmveslvqklahg -> llplnspa	42	[u'[\'/note="avaakqsslmveslvqklahg -> llplnspa (in ref. 1; aaa23678/aaa24322)"\']']
368	CONFLICT	6	f -> s	40	[u'[\'/note="f -> s (in ref. 3; aaa51467)"\']', u'[\'/note="f -> s (in ref. 1; caa39634)"\']', u'[\'/note="f -> s (in ref. 2; caa23591)"\']', u'[\'/note="f -> s (in ref. 1; caa40706)"\']', u'[\'/note="f -> s (in ref. 6; aaa24740)"\']', u'[\'/note="f -> s (in ref. 1; aaa23870)"\']']
369	CONFLICT	1	daegnplpqg -> ecrrkstaar	40	[u'[\'/note="daegnplpqg -> ecrrkstaar (in ref. 1; caa33158)"\']']
370	CONFLICT	1	rsrgqvmerytlhsqgkiia -> ahavrswsvircihrvrlsp	40	[u'[\'/note="rsrgqvmerytlhsqgkiia -> ahavrswsvircihrvrlsp (in ref. 1; aaa24319)"\']']
371	CONFLICT	1	llssaidlvllgvipvivlavltdalfdlliallkvkrnd -> aakqrh	40	[u'[\'/note="llssaidlvllgvipvivlavltdalfdlliallkvkrnd -> aakqrh (in ref. 1; aaa60493)"\']']
372	CONFLICT	1	plaaacartplsnfnvgaia -> rwrrpvrvrhcrilmlaqlr	40	[u'[\'/note="plaaacartplsnfnvgaia -> rwrrpvrvrhcrilmlaqlr (in ref. 6)"\']']
373	CONFLICT	1	maskqlwrwhgitgdgnaqdgmlwaesrtlllmalqqqm -> mavsnsgag mayaqvvltt	39	[u'[\'/note="maskqlwrwhgitgdgnaqdgmlwaesrtlllmalqqqm -> mavsnsgag mayaqvvltt (in ref. 1; aac36925)"\']']
374	CONFLICT	11	l -> s	39	[u'[\'/note="l -> s (in ref. 1; aab28769)"\']', u'[\'/note="l -> s (in ref. 1; aaa83905)"\']', u'[\'/note="l -> s (in ref. 1; baa03315)"\']', u'[\'/note="l -> s (in ref. 4; aa sequence)"\']', u'[\'/note="l -> s (in ref. 3)"\']', u'[\'/note="l -> s (in ref. 1; aaa23878)"\']', u'[\'/note="l -> s (in ref. 4; d14008)"\']', u'[\'/note="l -> s (in ref. 1 and 2)"\']', u'[\'/note="l -> s (in ref. 1; aaa2…
375	CONFLICT	1	alsrieetlageagtcisl -> ryrelkrrwrakrgpvfrcsrrh	38	[u'[\'/note="alsrieetlageagtcisl -> ryrelkrrwrakrgpvfrcsrrh (in ref. 5; x12982)"\']']
376	CONFLICT	1	ddalwrrtkqgmwlnadqqsrvsqwlveytqqrlslas -> arrpvashkt rhvakcgstiscesvaggvyaaeviagvvn	38	[u'[\'/note="ddalwrrtkqgmwlnadqqsrvsqwlveytqqrlslas -> arrpvashkt rhvakcgstiscesvaggvyaaeviagvvn (in ref. 2; baa00327)"\']']
377	CONFLICT	1	akpqinaeeeirrsvdflk -> enrrlmlkrkfvvvsise	38	[u'[\'/note="akpqinaeeeirrsvdflk -> enrrlmlkrkfvvvsise (in ref. 1; aaa79852)"\']']
378	CONFLICT	1	gdyifmgayslqagygvgrgeafsyiyskdcnrdvei -> rrlhlygrlff tgwlwcraw	37	[u'[\'/note="gdyifmgayslqagygvgrgeafsyiyskdcnrdvei -> rrlhlygrlff tgwlwcraw (in ref. 2; aab40267)"\']']
379	CONFLICT	1	rlvhvneqvreyirnaerpegqgeapalsgdaplevl -> dwftsmnrfvn ifamlnvqkvrekrlpf	37	[u'[\'/note="rlvhvneqvreyirnaerpegqgeapalsgdaplevl -> dwftsmnrfvn ifamlnvqkvrekrlpf (in ref. 1; aaa65718/caa45394)"\']']
380	CONFLICT	1	rwlsergvnfmqgywisrplplddfvrwlkkpytpqw -> d	37	[u'[\'/note="rwlsergvnfmqgywisrplplddfvrwlkkpytpqw -> d (in ref. 4; no nucleotide entry)"\']']
381	CONFLICT	7	v -> i	36	[u'[\'/note="v -> i (in ref. 6; aaa53584)"\']', u'[\'/note="v -> i (in ref. 1; caa24914)"\']', u'[\'/note="v -> i (in ref. 7; aa sequence)"\']', u'[\'/note="v -> i (in ref. 1; u33213)"\']', u'[\'/note="v -> i (in ref. 4)"\']', u'[\'/note="v -> i (in ref. 1 and 2; caa45230)"\']', u'[\'/note="v -> i (in ref. 1; aaa23870)"\']']
382	CONFLICT	1	rvrtetdigasavsvafa -> pfalkqisvpalclsllp	36	[u'[\'/note="rvrtetdigasavsvafa -> pfalkqisvpalclsllp (in ref. 3; caa35476)"\']']
383	CONFLICT	1	qvvtak -> hhslrrrcstastyywaks	36	[u'[\'/note="qvvtak -> hhslrrrcstastyywaks (in ref. 2; aaa24079)"\']']
384	CONFLICT	1	esqaig -> kvrpla	36	[u'[\'/note="esqaig -> kvrpla (in ref. 1; aaa23433)"\']']
385	CONFLICT	1	pyagca -> rmpval	36	[u'[\'/note="pyagca -> rmpval (in ref. 4; caa25780/aaa24735)"\']']
386	CONFLICT	1	aglaka -> rwsget	36	[u'[\'/note="aglaka -> rwsget (in ref. 1; caa55388)"\']']
387	CONFLICT	1	sveeilnal -> twkrsstrydlhrstamvas	36	[u'[\'/note="sveeilnal -> twkrsstrydlhrstamvas (in ref. 1)"\']']
388	CONFLICT	1	sefhlqvaeptsylcryl -> tvsficklpnpplicaaicnsspsp	36	[u'[\'/note="sefhlqvaeptsylcryl -> tvsficklpnpplicaaicnsspsp (in ref. 1; caa54286)"\']']
389	CONFLICT	1	pqagecfsdrlvirgpdqnyseaytaltqafylfm -> rrrenalaia	35	[u'[\'/note="pqagecfsdrlvirgpdqnyseaytaltqafylfm -> rrrenalaia (in ref. 1; d13169 and 2; d64044)"\']']
390	CONFLICT	13	p -> a	35	[u'[\'/note="p -> a (in ref. 1 and 2)"\']', u'[\'/note="p -> a (in ref. 2; caa23665)"\']', u'[\'/note="p -> a (in ref. 1; aaa92731)"\']', u'[\'/note="p -> a (in ref. 1; aaa85770)"\']', u'[\'/note="p -> a (in ref. 1; baa14327)"\']', u'[\'/note="p -> a (in ref. 3; cab40809)"\']', u'[\'/note="p -> a (in ref. 1; aaa24276)"\']', u'[\'/note="p -> a (in ref. 1; aaa23725)"\']', u'[\'/note="p -> a (in ref…
391	CONFLICT	1	ggvitledndpcgtlfsiyipkvkpndssinpidr -> vvlslskimipav pyfqsifrk	35	[u'[\'/note="ggvitledndpcgtlfsiyipkvkpndssinpidr -> vvlslskimipav pyfqsifrk (in ref. 1; aac28951)"\']']
392	CONFLICT	1	petsvllvdekrgeasinikntddhpsllyttivd -> lkhqycwlmksvv klvlilriqmiilhcftpplli	35	[u'[\'/note="petsvllvdekrgeasinikntddhpsllyttivd -> lkhqycwlmksvv klvlilriqmiilhcftpplli (in ref. 1)"\']']
393	CONFLICT	6	d -> g	35	[u'[\'/note="d -> g (in ref. 1; aaa24519)"\']', u'[\'/note="d -> g (in ref. 5; aaa03208)"\']', u'[\'/note="d -> g (in ref. 4; aac77833)"\']', u'[\'/note="d -> g (in ref. 1; caa25037)"\']', u'[\'/note="d -> g (in ref. 1; caa35967)"\']', u'[\'/note="d -> g (in ref. 1; aaa23511)"\']']
394	CONFLICT	1	lavllnnagkvltqrql -> agrcstmpekyspsgpv	34	[u'[\'/note="lavllnnagkvltqrql -> agrcstmpekyspsgpv (in ref. 1; aaa24042)"\']']
395	CONFLICT	11	g -> r	34	[u'[\'/note="g -> r (in ref. 1; aaa83905)"\']', u'[\'/note="g -> r (in ref. 1; aaa56878)"\']', u'[\'/note="g -> r (in ref. 1; aaa24106)"\']', u'[\'/note="g -> r (in ref. 1; aaa23667)"\']', u'[\'/note="g -> r (in ref. 4; aaa89200)"\']', u'[\'/note="g -> r (in ref. 5; aaa23575)"\']', u'[\'/note="g -> r (in ref. 3; y07525)"\']', u'[\'/note="g -> r (in ref. 1; aaa23904)"\']', u'[\'/note="g -> r (in r…
396	CONFLICT	1	mgpiavlvdaiiekipg -> lgpncgaggcyhrenps	34	[u'[\'/note="mgpiavlvdaiiekipg -> lgpncgaggcyhrenps (in ref. 1; caa56230)"\']']
397	CONFLICT	1	msaiteskptrrwampdtlviiffvailtslatw -> mlfnqpchl	34	[u'[\'/note="msaiteskptrrwampdtlviiffvailtslatw -> mlfnqpchl (in ref. 4; d17576)"\']']
398	CONFLICT	1	aaqkqgircivdssgea -> lrknkgsaasstvlgqg	34	[u'[\'/note="aaqkqgircivdssgea -> lrknkgsaasstvlgqg (in ref. 1; aaa24321)"\']']
399	CONFLICT	1	iqrdqvedyarrkgmsvteverwlapnlgydad -> tsarsg	33	[u'[\'/note="iqrdqvedyarrkgmsvteverwlapnlgydad -> tsarsg (in ref. 1; caa34601)"\']']
400	CONFLICT	17	f -> l	33	[u'[\'/note="f -> l (in ref. 3; caa78692)"\']', u'[\'/note="f -> l (in ref. 5; aaa85768)"\']', u'[\'/note="f -> l (in ref. 1 and 5)"\']', u'[\'/note="f -> l (in ref. 3; cab40809)"\']', u'[\'/note="f -> l (in ref. 1; aaa18804)"\']', u'[\'/note="f -> l (in ref. 1; caa48371)"\']', u'[\'/note="f -> l (in ref. 1)"\']', u'[\'/note="f -> l (in ref. 2)"\']', u'[\'/note="f -> l (in ref. 1; caa46824)"\']',…
401	CONFLICT	9	t -> i	33	[u'[\'/note="t -> i (in ref. 1; aaa83891)"\']', u'[\'/note="t -> i (in ref. 1; caa23660/aaa83914)"\']', u'[\'/note="t -> i (in ref. 2; caa53207)"\']', u'[\'/note="t -> i (in ref. 1; aab20842)"\']', u'[\'/note="t -> i (in ref. 1; caa47260 and 5; x52890)"\']', u'[\'/note="t -> i (in ref. 4; aaa83873)"\']', u'[\'/note="t -> i (in ref. 1; caa27852/caa27853)"\']', u'[\'/note="t -> i (in ref. 1; aaa244…
402	CONFLICT	1	nnrq -> kqps	32	[u'[\'/note="nnrq -> kqps (in ref. 2; aab47972)"\']']
403	CONFLICT	1	dwldgwcetksvcvry -> plagragc	32	[u'[\'/note="dwldgwcetksvcvry -> plagragc (in ref. 1; caa67780)"\']']
404	CONFLICT	1	aaaelalg -> vpqn	32	[u'[\'/note="aaaelalg -> vpqn (in ref. 1; aaa62069)"\']']
405	CONFLICT	1	mqdvtpdawptwpvkl -> nagchprrmanlagkt	32	[u'[\'/note="mqdvtpdawptwpvkl -> nagchprrmanlagkt (in ref. 5; caa29031)"\']']
406	CONFLICT	4	l -> a	32	[u'[\'/note="l -> a (in ref. 1; aab42061)"\']', u'[\'/note="l -> a (in ref. 6; caa48926)"\']', u'[\'/note="l -> a (in ref. 1; caa30698)"\']', u'[\'/note="l -> a (in ref. 3; aaa24096)"\']']
407	CONFLICT	1	ydtktqpampanmeltdggqriklkmdnwivk -> mtpkrnlrcqpiwnsp tvvnass	32	[u'[\'/note="ydtktqpampanmeltdggqriklkmdnwivk -> mtpkrnlrcqpiwnsp tvvnass (in ref. 3; aac43435)"\']']
408	CONFLICT	1	aaqgrywqmyqlqlageelaasvreeeslsa -> rprdvladvstatcgrr agsqra	31	[u'[\'/note="aaqgrywqmyqlqlageelaasvreeeslsa -> rprdvladvstatcgrr agsqra (in ref. 1; aac36870)"\']']
409	CONFLICT	1	ngcagntalawlekyngpeltltafeppass -> mavrvirrwhgwknttv rn	31	[u'[\'/note="ngcagntalawlekyngpeltltafeppass -> mavrvirrwhgwknttv rn (in ref. 1; aaa23522)"\']']
410	CONFLICT	1	amrqgvisqrtawih -> ryasgrhqpaysldp	30	[u'[\'/note="amrqgvisqrtawih -> ryasgrhqpaysldp (in ref. 4)"\']']
411	CONFLICT	1	raeedaekqlaeqsa -> aqkkmqknnwqnsllnkef	30	[u'[\'/note="raeedaekqlaeqsa -> aqkkmqknnwqnsllnkef (in ref. 1; aaa97089)"\']']
412	CONFLICT	1	tdavrcsaktgvgvqdvlerlvrdipppeg -> hrrgalfsenrrwcagrs rtsgarhsaags	30	[u'[\'/note="tdavrcsaktgvgvqdvlerlvrdipppeg -> hrrgalfsenrrwcagrs rtsgarhsaags (in ref. 1 and 2)"\']']
413	CONFLICT	1	lvphn -> rypit	30	[u'[\'/note="lvphn -> rypit (in ref. 4; no nucleotide entry and 5; aaa03208)"\']']
414	CONFLICT	1	mphge -> daawq	30	[u'[\'/note="mphge -> daawq (in ref. 1; aac36924)"\']']
415	CONFLICT	1	lyfeagegprftspv -> ssilkpekvrvlprqi	30	[u'[\'/note="lyfeagegprftspv -> ssilkpekvrvlprqi (in ref. 1; baa02148)"\']']
416	CONFLICT	1	cakaatalqleqvlreregiraavfhegm -> rgirnhghscflceivirs qfhttyepea	29	[u'[\'/note="cakaatalqleqvlreregiraavfhegm -> rgirnhghscflceivirs qfhttyepea (in ref. 4)"\']']
417	CONFLICT	1	rykhllvqhhyisgiiagvcylcrkyyrk -> dinif	29	[u'[\'/note="rykhllvqhhyisgiiagvcylcrkyyrk -> dinif (in ref. 1; aaa24087)"\']']
418	CONFLICT	1	apintyemviypiaffvclfgqmrlfrsa -> dlsilmkw	29	[u'[\'/note="apintyemviypiaffvclfgqmrlfrsa -> dlsilmkw (in ref. 1; caa28396)"\']']
419	CONFLICT	11	l -> p	29	[u'[\'/note="l -> p (in ref. 1; aaa23437)"\']', u'[\'/note="l -> p (in ref. 4; x00981)"\']', u'[\'/note="l -> p (in ref. 5; u01827)"\']', u'[\'/note="l -> p (in ref. 1; aaa24605 and 2; no nucleotide entry)"\']', u'[\'/note="l -> p (in ref. 1; aaa19106)"\']', u'[\'/note="l -> p (in ref. 1; baa13052)"\']', u'[\'/note="l -> p (in ref. 1 and 2)"\']', u'[\'/note="l -> p (in ref. 1)"\']', u'[\'/note="l…
420	CONFLICT	1	vyaalpfliantkq -> ctqrcrsssptpns	28	[u'[\'/note="vyaalpfliantkq -> ctqrcrsssptpns (in ref. 1)"\']']
421	CONFLICT	1	rssinpflfpgege -> avpstrscfrvkesnl	28	[u'[\'/note="rssinpflfpgege -> avpstrscfrvkesnl (in ref. 1; caa34149)"\']']
422	CONFLICT	1	menkysrlqisihwlvfllviaaycame -> mlwkiniqgyksaftgwsfy wlsqriaqwr	28	[u'[\'/note="menkysrlqisihwlvfllviaaycame -> mlwkiniqgyksaftgwsfy wlsqriaqwr (in ref. 1; caa30454 and 2; no nucleotide entry)"\']']
423	CONFLICT	1	caaisrasgslnnptlsadnalslvpmv -> arqfrapaaa	28	[u'[\'/note="caaisrasgslnnptlsadnalslvpmv -> arqfrapaaa (in ref. 1; aaa60512)"\']']
424	CONFLICT	1	rasvlndtmqglvmligtvvlligvvha -> apaaerhharacdadwhrca aywrstc	28	[u'[\'/note="rasvlndtmqglvmligtvvlligvvha -> apaaerhharacdadwhrca aywrstc (in ref. 1; aaa24276)"\']']
425	CONFLICT	1	aqtlqqllaqvshl -> rkrssnfwrr	28	[u'[\'/note="aqtlqqllaqvshl -> rkrssnfwrr (in ref. 6; aab59060)"\']']
426	CONFLICT	1	gftdnpryiaeknymeallkkasphtvr -> tqksispyrtlnlclrrya	28	[u'[\'/note="gftdnpryiaeknymeallkkasphtvr -> tqksispyrtlnlclrrya (in ref. 4; aaa73004)"\']']
427	CONFLICT	1	gqakaqadrclscg -> arpkrrltaacraa	28	[u'[\'/note="gqakaqadrclscg -> arpkrrltaacraa (in ref. 1)"\']']
428	CONFLICT	5	qr -> hg	28	[u'[\'/note="qr -> hg (in ref. 2; aaa21302)"\']', u'[\'/note="qr -> hg (in ref. 1; aaa82637)"\']', u'[\'/note="qr -> hg (in ref. 1; aad10865)"\']', u'[\'/note="qr -> hg (in ref. 1; caa34965)"\']', u'[\'/note="qr -> hg (in ref. 1; caa63920)"\']']
429	CONFLICT	1	anm -> mna	27	[u'[\'/note="anm -> mna (in ref. 6; aa sequence)"\']']
430	CONFLICT	3	k -> t	27	[u'[\'/note="k -> t (in ref. 1; caa24914)"\']', u'[\'/note="k -> t (in ref. 3)"\']', u'[\'/note="k -> t (in ref. 2; aaa79810)"\']']
431	CONFLICT	1	ai -> tv	26	[u'[\'/note="ai -> tv (in ref. 2)"\']']
432	CONFLICT	1	gklrctapvfepg -> encavphrcsnp	26	[u'[\'/note="gklrctapvfepg -> encavphrcsnp (in ref. 1; aaa24321 and 5; aaa24320)"\']']
433	CONFLICT	1	rmmqkitheethsrnliiparliaak -> shdaknhp	26	[u'[\'/note="rmmqkitheethsrnliiparliaak -> shdaknhp (in ref. 1 and 2)"\']']
434	CONFLICT	1	dyfveqwrekhsa -> iillnngakstpr	26	[u'[\'/note="dyfveqwrekhsa -> iillnngakstpr (in ref. 1; baa25408 and 5; baa07684)"\']']
435	CONFLICT	1	gmnftdvatqmtnksglleitqlqgk -> nefyrcchandqqvgfagnyst agqt	26	[u'[\'/note="gmnftdvatqmtnksglleitqlqgk -> nefyrcchandqqvgfagnyst agqt (in ref. 1; aad14778)"\']']
436	CONFLICT	1	mmnstnklsviiplynagddfrtcme -> mramisalvwk	26	[u'[\'/note="mmnstnklsviiplynagddfrtcme -> mramisalvwk (in ref. 4; caa29885)"\']']
437	CONFLICT	8	s -> r	26	[u'[\'/note="s -> r (in ref. 1; aaa86827)"\']', u'[\'/note="s -> r (in ref. 1; aaa83835)"\']', u'[\'/note="s -> r (in ref. 5; m31530)"\']', u'[\'/note="s -> r (in ref. 2; x69109)"\']', u'[\'/note="s -> r (in ref. 10; aa sequence)"\']', u'[\'/note="s -> r (in ref. 1 and 2)"\']', u'[\'/note="s -> r (in ref. 1; aaa23428)"\']', u'[\'/note="s -> r (in ref. 1; aaa57938)"\']']
438	CONFLICT	1	lalvlcgiitsliapflfpiilavmg -> asagvmrdnyfadrtvpfpdys gsnglkfamrraflmyvsrva	26	[u'[\'/note="lalvlcgiitsliapflfpiilavmg -> asagvmrdnyfadrtvpfpdys gsnglkfamrraflmyvsrva (in ref. 1)"\']']
439	CONFLICT	1	fvpllwffgihgalaltaldngimtp -> lstalvlrihaacadrtgqrhy da	26	[u'[\'/note="fvpllwffgihgalaltaldngimtp -> lstalvlrihaacadrtgqrhy da (in ref. 1; caa37070)"\']']
440	CONFLICT	1	ishctaggkfvcndgsisaskktctn -> shtvrqaanlsvmmvllvhrkk halt	26	[u'[\'/note="ishctaggkfvcndgsisaskktctn -> shtvrqaanlsvmmvllvhrkk halt (in ref. 1)"\']']
441	CONFLICT	1	qaitrdytldihdengkapllsvfgg -> hvlpvitplifmmkmakhrccr ysaa	26	[u'[\'/note="qaitrdytldihdengkapllsvfgg -> hvlpvitplifmmkmakhrccr ysaa (in ref. 2; baa00327)"\']']
442	CONFLICT	1	kgqnygiieacrngivtsttalvng -> qrtelrhyrglsqwdchcrrrhc ew	25	[u'[\'/note="kgqnygiieacrngivtsttalvng -> qrtelrhyrglsqwdchcrrrhc ew (in ref. 1; caa47260 and 5; x52890)"\']']
443	CONFLICT	1	gkpidpnamflvatnnyrayggkfa -> asrlirtpcswlppitialtgqi c	25	[u'[\'/note="gkpidpnamflvatnnyrayggkfa -> asrlirtpcswlppitialtgqi c (in ref. 1; aaa23597)"\']']
444	CONFLICT	10	e -> d	25	[u'[\'/note="e -> d (in ref. 1; caa68548)"\']', u'[\'/note="e -> d (in ref. 1; caa27560)"\']', u'[\'/note="e -> d (in ref. 7; aa sequence)"\']', u'[\'/note="e -> d (in ref. 1; caa51662)"\']', u'[\'/note="e -> d (in ref. 1 and 5)"\']', u'[\'/note="e -> d (in ref. 2; caa46505)"\']', u'[\'/note="e -> d (in ref. 4; aab20471)"\']', u'[\'/note="e -> d (in ref. 4; aaa20044)"\']', u'[\'/note="e -> d (in …
445	CONFLICT	1	mlprenfrpgdrvrgvlysvrpear -> scrvktfalatafvacsipfarn g	25	[u'[\'/note="mlprenfrpgdrvrgvlysvrpear -> scrvktfalatafvacsipfarn g (in ref. 1; caa25200)"\']']
446	CONFLICT	1	gyfhnk -> visitnnnyggkrslppplpysfsemcyv	24	[u'[\'/note="gyfhnk -> visitnnnyggkrslppplpysfsemcyv (in ref. 1; aaa61972/caa36275)"\']']
447	CONFLICT	1	k -> m	24	[u'[\'/note="k -> m (in ref. 5; aa sequence)"\']']
448	CONFLICT	1	ha -> qp	24	[u'[\'/note="ha -> qp (in ref. 1; caa28806)"\']']
449	CONFLICT	1	dk -> kd	24	[u'[\'/note="dk -> kd (in ref. 10; aa sequence and 11; aa sequence)"\']']
450	CONFLICT	1	ia -> ms	24	[u'[\'/note="ia -> ms (in ref. 2; aaa23879)"\']']
451	CONFLICT	1	ah -> vrn	24	[u'[\'/note="ah -> vrn (in ref. 1; caa28806)"\']']
452	CONFLICT	1	antpkatl -> gehaerrrw	24	[u'[\'/note="antpkatl -> gehaerrrw (in ref. 1)"\']']
453	CONFLICT	2	sashefqvlaqs -> rpltnsrcwrr	24	[u'[\'/note="s -> q (in ref. 1)"\', \'/note="sashefqvlaqs -> rpltnsrcwrr (in ref. 2; aaa23710)"\']', u'[\'/note="sashefqvlaqs -> rpltnsrcwrr (in ref. 2; aaa23710)"\']']
454	CONFLICT	1	plad -> rwri	24	[u'[\'/note="plad -> rwri (in ref. 1; aab40437)"\']']
455	CONFLICT	1	neiedvvmqhpgvqevaavgvps -> trlkmsscsmvayrksrllaylp	23	[u'[\'/note="neiedvvmqhpgvqevaavgvps -> trlkmsscsmvayrksrllaylp (in ref. 2; aaa23752)"\']']
456	CONFLICT	8	i -> l	23	[u'[\'/note="i -> l (in ref. 1; aaa92731)"\']', u'[\'/note="i -> l (in ref. 7; aa sequence)"\']', u'[\'/note="i -> l (in ref. 5; aaa67956)"\']', u'[\'/note="i -> l (in ref. 1; caa47260 and 5; x52890)"\']', u'[\'/note="i -> l (in ref. 4)"\']', u'[\'/note="i -> l (in ref. 1; aa sequence)"\']', u'[\'/note="i -> l (in ref. 1; aaa98796)"\']', u'[\'/note="i -> l (in ref. 5; caa46822)"\']']
457	CONFLICT	5	r -> l	23	[u'[\'/note="r -> l (in ref. 1; aaa24474)"\']', u'[\'/note="r -> l (in ref. 4; aab20471)"\']', u'[\'/note="r -> l (in ref. 1; aaa67506)"\']', u'[\'/note="r -> l (in ref. 1; caa35706)"\']', u'[\'/note="r -> l (in ref. 5; caa46822)"\']']
458	CONFLICT	15	r -> g	23	[u'[\'/note="r -> g (in ref. 1; caa23565)"\']', u'[\'/note="r -> g (in ref. 6)"\']', u'[\'/note="r -> g (in ref. 1; aaa58219)"\']', u'[\'/note="r -> g (in ref. 5; aab59147)"\']', u'[\'/note="r -> g (in ref. 1; caa52095)"\']', u'[\'/note="r -> g (in ref. 4; caa29885)"\']', u'[\'/note="r -> g (in ref. 2; baa04501)"\']', u'[\'/note="r -> g (in ref. 1; aaa83887)"\']', u'[\'/note="r -> g (in ref. 1; a…
459	CONFLICT	1	siiiptllsalayglawkvmaii -> thyhpnta	23	[u'[\'/note="siiiptllsalayglawkvmaii -> thyhpnta (in ref. 4)"\']']
460	CONFLICT	2	ggtpilgivlg -> aqrrslvscla	22	[u'[\'/note="ggtpilgivlg -> aqrrslvscla (in ref. 2; aaa97137)"\']', u'[\'/note="ggtpilgivlg -> aqrrslvscla (in ref. 2; aaa97137)"\', \'/note="missing (in ref. 1; aac43381)"\']']
461	CONFLICT	1	pvewlwrqltlraagpaiskts -> rwngsgv	22	[u'[\'/note="pvewlwrqltlraagpaiskts -> rwngsgv (in ref. 4)"\']']
462	CONFLICT	1	eaeneakpidv -> drrtkpslstf	22	[u'[\'/note="eaeneakpidv -> drrtkpslstf (in ref. 1; caa48368)"\']']
463	CONFLICT	1	gsahainkags -> aapmrstkrda	22	[u'[\'/note="gsahainkags -> aapmrstkrda (in ref. 1 and 5)"\']']
464	CONFLICT	10	t -> n	22	[u'[\'/note="t -> n (in ref. 1; aac36870)"\']', u'[\'/note="t -> n (in ref. 5)"\']', u'[\'/note="t -> n (in ref. 7; aaa24741)"\']', u'[\'/note="t -> n (in ref. 2; caa69997)"\']', u'[\'/note="t -> n (in ref. 1 and 2)"\']', u'[\'/note="t -> n (in ref. 1; caa26974)"\']', u'[\'/note="t -> n (in ref. 1; caa29642)"\']', u'[\'/note="t -> n (in ref. 2; caa44834)"\']', u'[\'/note="t -> n (in ref. 1; aaa24…
465	CONFLICT	1	arildllesimqkqapgmllvt -> ggassicwkhyakqcgnaagd	22	[u'[\'/note="arildllesimqkqapgmllvt -> ggassicwkhyakqcgnaagd (in ref. 1; caa51662)"\']']
466	CONFLICT	4	eh -> dd	22	[u'[\'/note="eh -> dd (in ref. 1; caa40776)"\']', u'[\'/note="eh -> dd (in ref. 1; caa31413)"\']', u'[\'/note="eh -> dd (in ref. 6; aaa63764/aaa23684)"\']', u'[\'/note="eh -> dd (in ref. 1; caa32354)"\']']
467	CONFLICT	1	ieegvesqailvagrrsgmhlr -> nrrrg	22	[u'[\'/note="ieegvesqailvagrrsgmhlr -> nrrrg (in ref. 2; baa13051)"\']']
468	CONFLICT	1	mkrvlipgvilcgadvaqavdd -> mt	22	[u'[\'/note="mkrvlipgvilcgadvaqavdd -> mt (in ref. 1)"\']']
469	CONFLICT	1	wqyspmsapegddsllierdie -> cntaqcllrkgmih	22	[u'[\'/note="wqyspmsapegddsllierdie -> cntaqcllrkgmih (in ref. 1; caa52637)"\']']
470	CONFLICT	8	l -> m	22	[u'[\'/note="l -> m (in ref. 2; aab47972)"\']', u'[\'/note="l -> m (in ref. 3; caa35476)"\']', u'[\'/note="l -> m (in ref. 1; caa52095)"\']', u'[\'/note="l -> m (in ref. 1; aaa23748)"\']', u'[\'/note="l -> m (in ref. 4; aaa72134)"\']', u'[\'/note="l -> m (in ref. 1; caa42498)"\']', u'[\'/note="l -> m (in ref. 1)"\']', u'[\'/note="l -> m (in ref. 5; aaa21856)"\']']
471	CONFLICT	3	se -> rq	22	[u'[\'/note="se -> rq (in ref. 2; aab47972)"\']', u'[\'/note="se -> rq (in ref. 1; caa51663)"\']', u'[\'/note="se -> rq (in ref. 1; caa32419 and 2; aaa58165)"\']']
472	CONFLICT	1	tpwtlpanraisiapdfdyalv -> rrglclptaqsllhqistmrww	22	[u'[\'/note="tpwtlpanraisiapdfdyalv -> rrglclptaqsllhqistmrww (in ref. 1; aa sequence)"\']']
473	CONFLICT	7	d -> v	22	[u'[\'/note="d -> v (in ref. 1; caa33153)"\']', u'[\'/note="d -> v (in ref. 2; aab27925)"\']', u'[\'/note="d -> v (in ref. 1; aac43382)"\']', u'[\'/note="d -> v (in ref. 6; aac36869)"\']', u'[\'/note="d -> v (in ref. 1; caa23625/caa23627 and 11; aaa24585)"\']', u'[\'/note="d -> v (in ref. 5; aaa24677)"\']', u'[\'/note="d -> v (in ref. 2; caa45230)"\']']
474	CONFLICT	12	k -> e	21	[u'[\'/note="k -> e (in ref. 2 and 3; caa47646)"\']', u'[\'/note="k -> e (in ref. 1; aa sequence)"\']', u'[\'/note="k -> e (in ref. 5; aa sequence)"\']', u'[\'/note="k -> e (in ref. 1; aaa23463)"\']', u'[\'/note="k -> e (in ref. 2)"\']', u'[\'/note="k -> e (in ref. 4; aaa81026)"\']', u'[\'/note="k -> e (in ref. 1 and 5)"\']', u'[\'/note="k -> e (in ref. 1; aab88398)"\']', u'[\'/note="k -> e (in r…
475	CONFLICT	1	vefypasrygyrgnkyvtdlk -> grvlpsqpiwlsr	21	[u'[\'/note="vefypasrygyrgnkyvtdlk -> grvlpsqpiwlsr (in ref. 1; aaa23910)"\']']
476	CONFLICT	1	dadivvthaslegrvkrvtdk -> gcrisgrlhpwprswkgavetgvrn	21	[u'[\'/note="dadivvthaslegrvkrvtdk -> gcrisgrlhpwprswkgavetgvrn (in ref. 1; caa51229)"\']']
477	CONFLICT	1	lamaltsalsptpiagyslsf -> wlwryqraesdadcrlfsvv	21	[u'[\'/note="lamaltsalsptpiagyslsf -> wlwryqraesdadcrlfsvv (in ref. 1; aaa23763)"\']']
478	CONFLICT	1	gvpreqiitldlpkdteeeaa -> acrasklspwicqkipkkklq	21	[u'[\'/note="gvpreqiitldlpkdteeeaa -> acrasklspwicqkipkkklq (in ref. 4; d26440)"\']']
479	CONFLICT	1	qiapvvs -> tncasgilk	21	[u'[\'/note="qiapvvs -> tncasgilk (in ref. 1; aaa23567)"\']']
480	CONFLICT	1	paellapytgdiaaegiskam -> lrncwplipvisplkesakp	21	[u'[\'/note="paellapytgdiaaegiskam -> lrncwplipvisplkesakp (in ref. 1; aaa67629)"\']']
481	CONFLICT	1	nasvkqsgqlieqlslgvyda -> rrqreaeraahrttiagrlrr	21	[u'[\'/note="nasvkqsgqlieqlslgvyda -> rrqreaeraahrttiagrlrr (in ref. 1; aaa24721)"\']']
482	CONFLICT	1	apgakdakvenqtgvrtdwr -> rlaqkmqksktrrgayrla	20	[u'[\'/note="apgakdakvenqtgvrtdwr -> rlaqkmqksktrrgayrla (in ref. 1; caa35968)"\']']
483	CONFLICT	8	g -> d	20	[u'[\'/note="g -> d (in ref. 1; aaa23482)"\']', u'[\'/note="g -> d (in ref. 5; aaa03208)"\']', u'[\'/note="g -> d (in ref. 6; aap43521)"\']', u'[\'/note="g -> d (in ref. 1 and 2)"\']', u'[\'/note="g -> d (in ref. 1; caa26252)"\']', u'[\'/note="g -> d (in ref. 2; caa25720)"\']', u'[\'/note="g -> d (in ref. 1; aaa24446)"\']', u'[\'/note="g -> d (in ref. 4; aa sequence)"\']']
484	CONFLICT	1	sl -> as	20	[u'[\'/note="sl -> as (in ref. 2; caa46505)"\']']
485	CONFLICT	1	pemremaqdelreakekseq -> lryllylrlfvvlfrhvvgd	20	[u'[\'/note="pemremaqdelreakekseq -> lryllylrlfvvlfrhvvgd (in ref. 7; m30785)"\']']
486	CONFLICT	1	sgemlrrsrgyvpdalalpp -> rrnaapfagvcagcagfas	20	[u'[\'/note="sgemlrrsrgyvpdalalpp -> rrnaapfagvcagcagfas (in ref. 1; baa03315)"\']']
487	CONFLICT	1	dtkpvlralkrmlamrhykr -> eyqtgtartetyagdaslqt	20	[u'[\'/note="dtkpvlralkrmlamrhykr -> eyqtgtartetyagdaslqt (in ref. 6; aaa24195)"\']']
488	CONFLICT	1	aa -> r	20	[u'[\'/note="aa -> r (in ref. 2; aa sequence)"\']']
489	CONFLICT	1	vlyvlaltqtratlllfpii -> gtlcsgantnqsnptpvpyn	20	[u'[\'/note="vlyvlaltqtratlllfpii -> gtlcsgantnqsnptpvpyn (in ref. 1; aaa24524)"\']']
490	CONFLICT	1	eaieddakrrerqqetavat -> krlkmtlnaasaskkppsla	20	[u'[\'/note="eaieddakrrerqqetavat -> krlkmtlnaasaskkppsla (in ref. 1; aab02268)"\']']
491	CONFLICT	8	e -> k	20	[u'[\'/note="e -> k (in ref. 1; aaa24029)"\']', u'[\'/note="e -> k (in ref. 1 and 2)"\']', u'[\'/note="e -> k (in ref. 1 and 5)"\']', u'[\'/note="e -> k (in ref. 7; aa sequence)"\']', u'[\'/note="e -> k (in ref. 1; aaa23905)"\']', u'[\'/note="e -> k (in ref. 3; caa23544/aaa98736)"\']', u'[\'/note="e -> k (in ref. 8; aa sequence)"\']', u'[\'/note="e -> k (in ref. 4; aaa66217)"\']']
492	CONFLICT	1	ceevgcqnhgnaevahsesh -> riidsrfflrdfsqspksvyavlrf	20	[u'[\'/note="ceevgcqnhgnaevahsesh -> riidsrfflrdfsqspksvyavlrf (in ref. 1)"\']']
493	CONFLICT	1	spgtkvvdhsnhiyvnftln -> gagqginehsyfikidfdll	20	[u'[\'/note="spgtkvvdhsnhiyvnftln -> gagqginehsyfikidfdll (in ref. 4; x65538)"\']']
494	CONFLICT	6	er -> dg	20	[u'[\'/note="er -> dg (in ref. 1; aaa24010)"\']', u'[\'/note="er -> dg (in ref. 1; caa44390)"\']', u'[\'/note="er -> dg (in ref. 2; aaa67615)"\']', u'[\'/note="er -> dg (in ref. 1; aab28778)"\']', u'[\'/note="er -> dg (in ref. 1; aaa24619 and 2; caa38875)"\']', u'[\'/note="er -> dg (in ref. 1; aaa23915)"\']']
495	CONFLICT	6	g -> e	20	[u'[\'/note="g -> e (in ref. 1; baa13055)"\']', u'[\'/note="g -> e (in ref. 4; aat42474)"\']', u'[\'/note="g -> e (in ref. 9; aa sequence)"\']', u'[\'/note="g -> e (in ref. 1; aaa23665)"\']', u'[\'/note="g -> e (in ref. 3; aaa35359)"\']', u'[\'/note="g -> e (in ref. 7; baa04685)"\']']
496	CONFLICT	12	d -> e	20	[u'[\'/note="d -> e (in ref. 3; aa sequence)"\']', u'[\'/note="d -> e (in ref. 1; caa50799)"\']', u'[\'/note="d -> e (in ref. 3; aac43437)"\']', u'[\'/note="d -> e (in ref. 6; aap43521)"\']', u'[\'/note="d -> e (in ref. 1; caa56228)"\']', u'[\'/note="d -> e (in ref. 7; aa sequence)"\']', u'[\'/note="d -> e (in ref. 4; aab40286)"\']', u'[\'/note="d -> e (in ref. 7; aaa23468)"\']', u'[\'/note="d ->…
497	CONFLICT	9	t -> r	19	[u'[\'/note="t -> r (in ref. 2; aaa23716)"\']', u'[\'/note="t -> r (in ref. 1; caa23660/aaa83914)"\']', u'[\'/note="t -> r (in ref. 2; aaa67580)"\']', u'[\'/note="t -> r (in ref. 1; aaa16399)"\']', u'[\'/note="t -> r (in ref. 2; caa46229)"\']', u'[\'/note="t -> r (in ref. 1; caa25223)"\']', u'[\'/note="t -> r (in ref. 1; aaa24110)"\']', u'[\'/note="t -> r (in ref. 1; aaa64939)"\']', u'[\'/note="t…
498	CONFLICT	1	vdisiytnveddyfflifp -> rgyinihkcrr	19	[u'[\'/note="vdisiytnveddyfflifp -> rgyinihkcrr (in ref. 1)"\']']
499	CONFLICT	9	h -> d	19	[u'[\'/note="h -> d (in ref. 7; caa48363)"\']', u'[\'/note="h -> d (in ref. 1 and 2)"\']', u'[\'/note="h -> d (in ref. 1; caa40776)"\']', u'[\'/note="h -> d (in ref. 1; baa04900)"\']', u'[\'/note="h -> d (in ref. 1; aac43177)"\']', u'[\'/note="h -> d (in ref. 1; aab61770)"\']', u'[\'/note="h -> d (in ref. 1; caa44270)"\']', u'[\'/note="h -> d (in ref. 1; aac36918)"\']', u'[\'/note="h -> d (in ref…
500	CONFLICT	7	e -> g	19	[u'[\'/note="e -> g (in ref. 3; cab40810)"\']', u'[\'/note="e -> g (in ref. 5; aa sequence)"\']', u'[\'/note="e -> g (in ref. 3; caa32595 and 4; aaa24663)"\']', u'[\'/note="e -> g (in ref. 2; x69109)"\']', u'[\'/note="e -> g (in ref. 1; baa13054)"\']', u'[\'/note="el -> dv (in ref. 2; aaa23874/aaa58226)"\', \'/note="e -> g (in ref. 5; aaa23875)"\']', u'[\'/note="e -> g (in ref. 5)"\']']
501	CONFLICT	1	ggsevtrntlanakellaa -> vavkshvihwrmrknclqrklfscftvrv nsktp	19	[u'[\'/note="ggsevtrntlanakellaa -> vavkshvihwrmrknclqrklfscftvrv nsktp (in ref. 1; caa68435)"\']']
502	CONFLICT	4	n -> t	18	[u'[\'/note="n -> t (in ref. 2; caa33124)"\']', u'[\'/note="n -> t (in ref. 2; aaa24406/aaa24407)"\']', u'[\'/note="n -> t (in ref. 4; caa26395)"\']', u'[\'/note="n -> t (in ref. 4; x65538)"\']']
503	CONFLICT	1	aryadqpafvnmgevmtf -> galrrstcvceygggndl	18	[u'[\'/note="aryadqpafvnmgevmtf -> galrrstcvceygggndl (in ref. 2; aaa23752)"\']']
504	CONFLICT	1	wlm -> cy	18	[u'[\'/note="wlm -> cy (in ref. 1; aaa23433)"\']']
505	CONFLICT	1	qga -> rmp	18	[u'[\'/note="qga -> rmp (in ref. 1; aaa82637)"\']']
506	CONFLICT	1	nrsskaavrlpgvlcyqv -> sqqqghcpsawllcsgs	18	[u'[\'/note="nrsskaavrlpgvlcyqv -> sqqqghcpsawllcsgs (in ref. 6; caa27699)"\']']
507	CONFLICT	1	tqylmlpnr -> hsvfnaaqtg	18	[u'[\'/note="tqylmlpnr -> hsvfnaaqtg (in ref. 1; caa27327)"\']']
508	CONFLICT	1	lqhidfvra -> cststsfalnc	18	[u'[\'/note="lqhidfvra -> cststsfalnc (in ref. 6; aaa16413)"\']']
509	CONFLICT	9	s -> g	18	[u'[\'/note="s -> g (in ref. 1; aaa24522)"\']', u'[\'/note="s -> g (in ref. 7; aa sequence)"\']', u'[\'/note="s -> g (in ref. 4; aa sequence)"\']', u'[\'/note="s -> g (in ref. 1 and 2)"\']', u'[\'/note="s -> g (in ref. 5; m31532)"\']', u'[\'/note="s -> g (in ref. 1; aaa23870)"\']', u'[\'/note="s -> g (in ref. 1; aaa85769)"\']', u'[\'/note="s -> g (in ref. 1; caa42834 and 4; baa14828)"\']', u'[\'/…
510	CONFLICT	1	avkvgftgv -> rrkgwvywr	18	[u'[\'/note="avkvgftgv -> rrkgwvywr (in ref. 1; caa29154)"\']']
511	CONFLICT	1	gea -> ak	18	[u'[\'/note="gea -> ak (in ref. 1; caa28808)"\']']
512	CONFLICT	1	yrvvlkadf -> tawc	18	[u'[\'/note="yrvvlkadf -> tawc (in ref. 1; aaa72122)"\']']
513	CONFLICT	4	a -> d	18	[u'[\'/note="a -> d (in ref. 1; caa57795)"\']', u'[\'/note="a -> d (in ref. 5; aa sequence)"\']', u'[\'/note="a -> d (in ref. 3; caa23592)"\']', u'[\'/note="a -> d (in ref. 2; aaa74741)"\']']
514	CONFLICT	1	nfdkglqeitdwiekrlc -> kiltkvfrksptgsknacvknllnfanlvk qlhhnrr	18	[u'[\'/note="nfdkglqeitdwiekrlc -> kiltkvfrksptgsknacvknllnfanlvk qlhhnrr (in ref. 1 and 2)"\']']
515	CONFLICT	1	dkwlraeraymlchlvca -> vqmrarrtcihavspgvc	18	[u'[\'/note="dkwlraeraymlchlvca -> vqmrarrtcihavspgvc (in ref. 1; caa52048)"\']']
516	CONFLICT	1	niirtpeth -> khypysrnd	18	[u'[\'/note="niirtpeth -> khypysrnd (in ref. 6; aaa53584)"\']']
517	CONFLICT	1	raa -> mlq	18	[u'[\'/note="raa -> mlq (in ref. 2; caa23519)"\']']
518	CONFLICT	1	qlesia -> swkasp	18	[u'[\'/note="qlesia -> swkasp (in ref. 5; m63308)"\']']
519	CONFLICT	6	a -> e	17	[u'[\'/note="a -> e (in ref. 5; aaa23436)"\']', u'[\'/note="a -> e (in ref. 1; aaa24729)"\']', u'[\'/note="a -> e (in ref. 1; baa21778)"\']', u'[\'/note="a -> e (in ref. 7; aa sequence)"\']', u'[\'/note="a -> e (in ref. 1; aaa23616)"\']', u'[\'/note="a -> e (in ref. 2; caa46505)"\']']
520	CONFLICT	1	rrtrrprkraprregta -> qsyssstqtrtts	17	[u'[\'/note="rrtrrprkraprregta -> qsyssstqtrtts (in ref. 1; aaa24303)"\']']
521	CONFLICT	6	l -> i	17	[u'[\'/note="l -> i (in ref. 5; aa sequence)"\']', u'[\'/note="l -> i (in ref. 6; caa27699)"\']', u'[\'/note="l -> i (in ref. 1)"\']', u'[\'/note="l -> i (in ref. 4; aa sequence)"\']', u'[\'/note="l -> i (in ref. 2; aa sequence)"\']', u'[\'/note="l -> i (in ref. 1; aaa23810)"\']']
522	CONFLICT	8	i -> n	17	[u'[\'/note="i -> n (in ref. 1; caa23606)"\']', u'[\'/note="i -> n (in ref. 1; aaa23482)"\']', u'[\'/note="i -> n (in ref. 1; aaa75183)"\']', u'[\'/note="i -> n (in ref. 1; aaa64506)"\']', u'[\'/note="i -> n (in ref. 2)"\']', u'[\'/note="i -> n (in ref. 1)"\']', u'[\'/note="i -> n (in ref. 1; aab04893)"\']', u'[\'/note="i -> n (in ref. 1; caa48112)"\']']
523	CONFLICT	1	srvalerylnglfgeas -> cvlrlnvi	17	[u'[\'/note="srvalerylnglfgeas -> cvlrlnvi (in ref. 1)"\']']
524	CONFLICT	1	pvvllingytkgdwwea -> aggavnqwlhqrrlvgs	17	[u'[\'/note="pvvllingytkgdwwea -> aggavnqwlhqrrlvgs (in ref. 1; aaa97139)"\']']
525	CONFLICT	1	qpsldfpprsagsekkn -> shrwisppevrirkeel	17	[u'[\'/note="qpsldfpprsagsekkn -> shrwisppevpdpkrrt (in ref. 1; caa26900)"\', \'/note="qpsldfpprsagsekkn -> shrwisppevrirkeel (in ref. 2; aaa25030)"\']']
526	CONFLICT	1	alalgfvslpllawia -> gagaadslvcrcwrgsp	16	[u'[\'/note="alalgfvslpllawia -> gagaadslvcrcwrgsp (in ref. 1; aac44147)"\']']
527	CONFLICT	1	qvqpmvvspdkrylyv -> rcsrwwsartnvisml	16	[u'[\'/note="qvqpmvvspdkrylyv -> rcsrwwsartnvisml (in ref. 1)"\']']
528	CONFLICT	1	lipgfiilsvmgiiaw -> fnsrlyysfrdgdycl	16	[u'[\'/note="lipgfiilsvmgiiaw -> fnsrlyysfrdgdycl (in ref. 1; caa37070)"\']']
529	CONFLICT	1	eiylrkee -> rnlp	16	[u'[\'/note="eiylrkee -> rnlp (in ref. 1; aab95616)"\']']
530	CONFLICT	1	dttq -> ttqg	16	[u'[\'/note="dttq -> ttqg (in ref. 1; no nucleotide entry)"\']']
531	CONFLICT	1	sd -> er	16	[u'[\'/note="sd -> er (in ref. 1; aaa62629)"\']']
532	CONFLICT	1	tmci -> dgcvs	16	[u'[\'/note="tmci -> dgcvs (in ref. 2; aa sequence)"\']']
533	CONFLICT	2	lgeefvnk -> waksslisn	16	[u'[\'/note="lgeefvnk -> waksslisn (in ref. 2)"\']', u'[\'/note="e -> q (in ref. 1)"\', \'/note="lgeefvnk -> waksslisn (in ref. 2)"\']']
534	CONFLICT	2	ra -> pr	16	[u'[\'/note="ra -> pr (in ref. 1; aaa62629)"\']', u'[\'/note="ra -> pr (in ref. 1; aaa62629)"\', \'/note="amfeettlslndlvlpifveeeid -> vclkrqhlslttwccrsllkkklt (in ref. 2; caa35467)"\']']
535	CONFLICT	1	er -> g	16	[u'[\'/note="er -> g (in ref. 6; caa23629)"\']']
536	CONFLICT	1	tgceswpkkcpkpea -> qvanhglknvpsqkh	15	[u'[\'/note="tgceswpkkcpkpea -> qvanhglknvpsqkh (in ref. 1; aaa24074)"\']']
537	CONFLICT	1	aawiqfliviplmii -> rsvdpvpdrhpaddy	15	[u'[\'/note="aawiqfliviplmii -> rsvdpvpdrhpaddy (in ref. 1; aaa57879)"\']']
538	CONFLICT	1	vavvvgialhslmdg -> srsggdcaafidgrk	15	[u'[\'/note="vavvvgialhslmdg -> srsggdcaafidgrk (in ref. 1)"\']']
539	CONFLICT	8	v -> e	15	[u'[\'/note="v -> e (in ref. 5; x06118)"\']', u'[\'/note="v -> e (in ref. 2; caa53207)"\']', u'[\'/note="v -> e (in ref. 5; m24777)"\']', u'[\'/note="v -> e (in ref. 1; caa26357)"\']', u'[\'/note="v -> e (in ref. 1; caa29775)"\']', u'[\'/note="v -> e (in ref. 1; aaa19938)"\']', u'[\'/note="v -> e (in ref. 1; aaa23453)"\']', u'[\'/note="v -> e (in ref. 1; aaa20584)"\']']
540	CONFLICT	3	y -> n	15	[u'[\'/note="y -> n (in ref. 2)"\']', u'[\'/note="y -> n (in ref. 1)"\']', u'[\'/note="y -> n (in ref. 4; d26440)"\']']
541	CONFLICT	1	viliiqlvsagqrvs -> rninypagvcgsesq	15	[u'[\'/note="viliiqlvsagqrvs -> rninypagvcgsesq (in ref. 1 and 2)"\']']
542	CONFLICT	1	lvacfavdqdenpqr -> rnddksadrqsqha	15	[u'[\'/note="lvacfavdqdenpqr -> rnddksadrqsqha (in ref. 1; aaa23706)"\']']
543	CONFLICT	1	plnwehhqpcvrgea -> svklgtssalcawrt	15	[u'[\'/note="plnwehhqpcvrgea -> svklgtssalcawrt (in ref. 4; z11796)"\']']
544	CONFLICT	1	ittqqeekirrgeld -> sprnrrkkfavvnst	15	[u'[\'/note="ittqqeekirrgeld -> sprnrrkkfavvnst (in ref. 1; caa86020)"\']']
545	CONFLICT	1	ishvslveilipfcv -> nnaxvs	15	[u'[\'/note="ishvslveilipfcv -> nnaxvs (in ref. 1)"\']']
546	CONFLICT	1	napaefa -> kegankrgnssrltqsfhffmfepifspvnalnqpi	14	[u'[\'/note="napaefa -> kegankrgnssrltqsfhffmfepifspvnalnqpi (in ref. 2; bae77164)"\']']
547	CONFLICT	1	eraqhirdriasgk -> dvrntsvivsplvskslsslrwssaspl	14	[u'[\'/note="eraqhirdriasgk -> dvrntsvivsplvskslsslrwssaspl (in ref. 5; caa58106)"\']']
548	CONFLICT	1	inelvrhqhidylv -> dq	14	[u'[\'/note="inelvrhqhidylv -> dq (in ref. 1; aaa60371)"\']']
549	CONFLICT	1	rstifpn -> stifpdr	14	[u'[\'/note="rstifpn -> stifpdr (in ref. 4; aa sequence)"\']']
550	CONFLICT	1	gkltras -> ethsrh	14	[u'[\'/note="gkltras -> ethsrh (in ref. 5; aaa72135)"\']']
551	CONFLICT	1	fvvagsywgqtdgq -> lrgrrkllgprptvk	14	[u'[\'/note="fvvagsywgqtdgq -> lrgrrkllgprptvk (in ref. 1; caa48370)"\']']
552	CONFLICT	1	wytqtdttivsaes -> giprpiprlfcgnp	14	[u'[\'/note="wytqtdttivsaes -> giprpiprlfcgnp (in ref. 4)"\']']
553	CONFLICT	1	il -> mv	14	[u'[\'/note="il -> mv (in ref. 1 and 2)"\']']
554	CONFLICT	1	ailfsdi -> rssfry	14	[u'[\'/note="ailfsdi -> rssfry (in ref. 1; baa02148)"\']']
555	CONFLICT	3	qp -> ha	14	[u'[\'/note="qp -> ha (in ref. 1; aaa58205)"\']', u'[\'/note="qp -> ha (in ref. 1; aad10865)"\']', u'[\'/note="qp -> ha (in ref. 3; aaa23991)"\']']
556	CONFLICT	6	e -> v	14	[u'[\'/note="e -> v (in ref. 1; caa34435)"\']', u'[\'/note="e -> v (in ref. 1; aac73960)"\']', u'[\'/note="e -> v (in ref. 1 and 5)"\']', u'[\'/note="e -> v (in ref. 2; caa27701)"\']', u'[\'/note="e -> v (in ref. 1 and 2)"\']', u'[\'/note="e -> v (in ref. 1; caa25360)"\']']
557	CONFLICT	8	p -> s	14	[u'[\'/note="p -> s (in ref. 1; caa29154)"\']', u'[\'/note="p -> s (in ref. 1; aaa17550)"\']', u'[\'/note="p -> s (in ref. 1; caa48166 and 3; aaa69102)"\']', u'[\'/note="p -> s (in ref. 1; aaa24554)"\']', u'[\'/note="p -> s (in ref. 1; u33213)"\']', u'[\'/note="p -> s (in ref. 5)"\']', u'[\'/note="p -> s (in ref. 1; aaa97504)"\']', u'[\'/note="p -> s (in ref. 5; aaa23875)"\']']
558	CONFLICT	1	ekfreelnethqlf -> gkiprrvernasvv	14	[u'[\'/note="ekfreelnethqlf -> gkiprrvernasvv (in ref. 5)"\']']
559	CONFLICT	1	aherkas -> hmsvkpaenrcliyclnqetevvagfgfyfsllckmlipll fl	14	[u'[\'/note="aherkas -> hmsvkpaenrcliyclnqetevvagfgfyfsllckmlipll fl (in ref. 1; aaa23996)"\']']
560	CONFLICT	1	tqakaalestlaai -> aaagraldaiiasv	14	[u'[\'/note="tqakaalestlaai -> aaagraldaiiasv (in ref. 7; aa sequence)"\']']
561	CONFLICT	1	phyamta -> salrddr	14	[u'[\'/note="phyamta -> salrddr (in ref. 2; aab06895 and 3; aaa83840)"\']']
562	CONFLICT	1	cgigdvv -> gigdvvc	14	[u'[\'/note="cgigdvv -> gigdvvc (in ref. 4; aa sequence)"\']']
563	CONFLICT	1	spndvvs -> dpnsvv	14	[u'[\'/note="spndvvs -> dpnsvv (in ref. 4; aa sequence and 5; aa sequence)"\']']
564	CONFLICT	1	griaaridpewvep -> ahccvstrngga	14	[u'[\'/note="griaaridpewvep -> ahccvstrngga (in ref. 1)"\']']
565	CONFLICT	5	d -> y	14	[u'[\'/note="d -> y (in ref. 7; aa sequence)"\']', u'[\'/note="d -> y (in ref. 1; aaa85770)"\']', u'[\'/note="d -> y (in ref. 4; caa94434)"\']', u'[\'/note="d -> y (in ref. 1; aab02732)"\']', u'[\'/note="d -> y (in ref. 5)"\']']
566	CONFLICT	9	t -> a	13	[u'[\'/note="t -> a (in ref. 1; aac36861)"\']', u'[\'/note="t -> a (in ref. 1; caa23660/aaa83914)"\']', u'[\'/note="t -> a (in ref. 4; aaa81026)"\']', u'[\'/note="t -> a (in ref. 4; aaa23956)"\']', u'[\'/note="t -> a (in ref. 1; caa25199)"\']', u'[\'/note="t -> a (in ref. 1; aaa23462)"\']', u'[\'/note="t -> a (in ref. 1; aaa24659)"\']', u'[\'/note="t -> a (in ref. 1; aaa24639)"\']', u'[\'/note="t…
567	CONFLICT	4	q -> p	13	[u'[\'/note="q -> p (in ref. 1; baa12689)"\']', u'[\'/note="q -> p (in ref. 5; aa sequence)"\']', u'[\'/note="q -> p (in ref. 6; aac31629)"\']', u'[\'/note="q -> p (in ref. 5)"\']']
568	CONFLICT	1	yeripvtlvedna -> mnvsq	13	[u'[\'/note="yeripvtlvedna -> mnvsq (in ref. 1 and 2)"\']']
569	CONFLICT	1	vgqgpmwvvvnah -> sgrdqcgwwlthtkr	13	[u'[\'/note="vgqgpmwvvvnah -> sgrdqcgwwlthtkr (in ref. 1)"\']']
570	CONFLICT	1	asyyasrekdtpi -> rlisvackrhph	13	[u'[\'/note="asyyasrekdtpi -> rlisvackrhph (in ref. 2; aaa23770)"\']']
571	CONFLICT	1	qssfdprkdwgka -> pvvf	13	[u'[\'/note="qssfdprkdwgka -> pvvf (in ref. 1; baa03950)"\']']
572	CONFLICT	1	gkaislsgeaqsg -> akpspfpgrrkvv	13	[u'[\'/note="gkaislsgeaqsg -> akpspfpgrrkvv (in ref. 1)"\']']
573	CONFLICT	7	l -> q	13	[u'[\'/note="l -> q (in ref. 3; aaa96996)"\']', u'[\'/note="l -> q (in ref. 1; caa27051)"\']', u'[\'/note="l -> q (in ref. 4)"\']', u'[\'/note="l -> q (in ref. 1; baa00577/baa00578)"\']', u'[\'/note="l -> q (in ref. 2; aab18572)"\']', u'[\'/note="l -> q (in ref. 1; caa42643)"\']', u'[\'/note="l -> q (in ref. 2; baa13051)"\']']
574	CONFLICT	1	ggdgnsgstgyat -> eameiaevqatp	13	[u'[\'/note="ggdgnsgstgyat -> eameiaevqatp (in ref. 1)"\']']
575	CONFLICT	1	kclfgiyqkdsgt -> naclvfikrlrh	13	[u'[\'/note="kclfgiyqkdsgt -> naclvfikrlrh (in ref. 4)"\']']
576	CONFLICT	1	glltilnivyklf -> vc	13	[u'[\'/note="glltilnivyklf -> vc (in ref. 1; caa32594 and 2; aaa24662)"\']']
577	CONFLICT	3	qq -> he	12	[u'[\'/note="qq -> he (in ref. 1; aaa24521)"\']', u'[\'/note="qq -> he (in ref. 1; caa52095)"\']', u'[\'/note="qq -> he (in ref. 5; aab59101/aab59102)"\']']
578	CONFLICT	1	figvdffangeq -> lsalissltask	12	[u'[\'/note="figvdffangeq -> lsalissltask (in ref. 1; caa48371)"\']']
579	CONFLICT	1	mra -> iar	12	[u'[\'/note="mra -> iar (in ref. 1; aaa23895/caa25487)"\']']
580	CONFLICT	1	me -> wk	12	[u'[\'/note="me -> wk (in ref. 1; j04726)"\']']
581	CONFLICT	3	q -> k	12	[u'[\'/note="q -> k (in ref. 1; aac77848)"\']', u'[\'/note="q -> k (in ref. 2; caa46505)"\']', u'[\'/note="q -> k (in ref. 2; aad13473)"\']']
582	CONFLICT	1	rda -> arc	12	[u'[\'/note="rda -> arc (in ref. 1; aab60162/baa02314)"\']']
583	CONFLICT	1	spggmvhgygla -> alvawcmlrag	12	[u'[\'/note="spggmvhgygla -> alvawcmlrag (in ref. 5)"\']']
584	CONFLICT	1	fptgtp -> llpipg	12	[u'[\'/note="fptgtp -> llpipg (in ref. 6; caa35813)"\']']
585	CONFLICT	1	lg -> sv	12	[u'[\'/note="lg -> sv (in ref. 1; aaa82637)"\']']
586	CONFLICT	1	smrmes -> qyaygk	12	[u'[\'/note="smrmes -> qyaygk (in ref. 1 and 2)"\']']
587	CONFLICT	1	al -> em	12	[u'[\'/note="al -> em (in ref. 1; aac36924)"\']']
588	CONFLICT	1	kkl -> ekm	12	[u'[\'/note="kkl -> ekm (in ref. 1; caa26356)"\']']
589	CONFLICT	7	i -> m	12	[u'[\'/note="i -> m (in ref. 1; aaa23667)"\']', u'[\'/note="i -> m (in ref. 1; aaa85770)"\']', u'[\'/note="i -> m (in ref. 1; aaa67589)"\']', u'[\'/note="i -> m (in ref. 1; aaa23724)"\']', u'[\'/note="i -> m (in ref. 4; aaa66217)"\']', u'[\'/note="i -> m (in ref. 1; aaa24523)"\']', u'[\'/note="i -> m (in ref. 2; aaa24185)"\']']
590	CONFLICT	1	ladl -> ieyk	12	[u'[\'/note="ladl -> ieyk (in ref. 1; caa25037)"\']']
591	CONFLICT	7	s -> l	12	[u'[\'/note="s -> l (in ref. 1; caa48361)"\']', u'[\'/note="s -> l (in ref. 1; aab18051)"\']', u'[\'/note="s -> l (in ref. 1; caa29154)"\']', u'[\'/note="s -> l (in ref. 1 and 2)"\']', u'[\'/note="s -> l (in ref. 3; aab40282)"\']', u'[\'/note="s -> l (in ref. 1)"\']', u'[\'/note="s -> l (in ref. 1; caa56231)"\']']
592	CONFLICT	2	s -> y	12	[u'[\'/note="s -> y (in ref. 1; aaa62629)"\']', u'[\'/note="s -> y (in ref. 3)"\']']
593	CONFLICT	1	pwl -> rv	12	[u'[\'/note="pwl -> rv (in ref. 1 and 2)"\']']
594	CONFLICT	1	sr -> t	12	[u'[\'/note="sr -> t (in ref. 2)"\']']
595	CONFLICT	1	qal -> hgv	12	[u'[\'/note="qal -> hgv (in ref. 5; aab59101/aab59102)"\']']
596	CONFLICT	1	tltryqdlktpy -> nsdalsgfe	12	[u'[\'/note="tltryqdlktpy -> nsdalsgfe (in ref. 1; caa50733)"\']']
597	CONFLICT	1	ggg -> ar	12	[u'[\'/note="ggg -> ar (in ref. 1 and 2)"\']']
598	CONFLICT	1	r -> n	12	[u'[\'/note="r -> n (in ref. 8; aa sequence)"\']']
599	CONFLICT	7	r -> c	12	[u'[\'/note="r -> c (in ref. 2; aaa97510)"\']', u'[\'/note="r -> c (in ref. 1; caa60105)"\']', u'[\'/note="r -> c (in ref. 7; aa sequence)"\']', u'[\'/note="r -> c (in ref. 1; caa47260 and 5; x52890)"\']', u'[\'/note="r -> c (in ref. 1; aa sequence)"\']', u'[\'/note="r -> c (in ref. 2; aak64508)"\']', u'[\'/note="r -> c (in ref. 1)"\']']
600	CONFLICT	1	ntllrmmprkrs -> htsthdaa	12	[u'[\'/note="ntllrmmprkrs -> htsthdaa (in ref. 1; caa30454 and 2; no nucleotide entry)"\']']
601	CONFLICT	1	afakre -> gspnq	12	[u'[\'/note="afakre -> gspnq (in ref. 1; caa48368)"\']']
602	CONFLICT	1	mlkkclpllllc -> msapavav	12	[u'[\'/note="mlkkclpllllc -> msapavav (in ref. 1; aa sequence)"\']']
603	CONFLICT	1	gggqwl -> satva	12	[u'[\'/note="gggqwl -> satva (in ref. 1; baa02148)"\']']
604	CONFLICT	1	dapa -> mtrq	12	[u'[\'/note="dapa -> mtrq (in ref. 6)"\']']
605	CONFLICT	1	ing -> nka	12	[u'[\'/note="ing -> nka (in ref. 1; baa13053)"\']']
606	CONFLICT	5	ml -> iv	12	[u'[\'/note="ml -> iv (in ref. 1; caa51660)"\']', u'[\'/note="ml -> iv (in ref. 1; caa46823)"\']', u'[\'/note="ml -> iv (in ref. 1; aaa24303)"\']', u'[\'/note="ml -> iv (in ref. 1; aac77848)"\']', u'[\'/note="ml -> iv (in ref. 1)"\']']
607	CONFLICT	1	tlqp -> rcst	12	[u'[\'/note="tlqp -> rcst (in ref. 4; caa23590)"\']']
608	CONFLICT	4	a -> s	11	[u'[\'/note="a -> s (in ref. 1; caa29155)"\']', u'[\'/note="a -> s (in ref. 1; caa35211)"\']', u'[\'/note="a -> s (in ref. 1)"\']', u'[\'/note="a -> s (in ref. 2; aaa23652)"\']']
609	CONFLICT	9	g -> v	11	[u'[\'/note="g -> v (in ref. 2; aaa24014)"\']', u'[\'/note="g -> v (in ref. 4; aaa89200)"\']', u'[\'/note="g -> v (in ref. 1; aab88398)"\']', u'[\'/note="g -> v (in ref. 1; caa46823)"\']', u'[\'/note="g -> v (in ref. 1; caa33253 and 2; caa79667)"\']', u'[\'/note="g -> v (in ref. 1; aa sequence)"\']', u'[\'/note="g -> v (in ref. 1)"\']', u'[\'/note="g -> v (in ref. 1; baa07685)"\']', u'[\'/note="g…
610	CONFLICT	1	krsaladnaai -> nvlrrqrgy	11	[u'[\'/note="krsaladnaai -> nvlrrqrgy (in ref. 2; aaa23770)"\']']
611	CONFLICT	1	lrliyegvtqr -> ya	11	[u'[\'/note="lrliyegvtqr -> ya (in ref. 1; aab18053)"\']']
612	CONFLICT	4	v -> d	11	[u'[\'/note="v -> d (in ref. 3; caa23673)"\']', u'[\'/note="v -> d (in ref. 1; aaa23667)"\']', u'[\'/note="v -> d (in ref. 4; aab20471)"\']', u'[\'/note="v -> d (in ref. 1)"\']']
613	CONFLICT	1	twfasdrfthd -> ylvcqrplypr	11	[u'[\'/note="twfasdrfthd -> ylvcqrplypr (in ref. 1; caa50733)"\']']
614	CONFLICT	1	ftdatpttldd -> iyrcdtnhtcmh	11	[u'[\'/note="ftdatpttldd -> iyrcdtnhtcmh (in ref. 1 and 2)"\']']
615	CONFLICT	8	s -> c	11	[u'[\'/note="s -> c (in ref. 1; aaa24004)"\']', u'[\'/note="s -> c (in ref. 1; aaa72575)"\']', u'[\'/note="s -> c (in ref. 9; aa sequence)"\']', u'[\'/note="s -> c (in ref. 3; aac43340)"\']', u'[\'/note="s -> c (in ref. 1; aaa16430)"\']', u'[\'/note="s -> c (in ref. 2; caa29254)"\']', u'[\'/note="s -> c (in ref. 4; aaa83867)"\']', u'[\'/note="s -> c (in ref. 2; aaa24185)"\']']
616	CONFLICT	5	i -> t	11	[u'[\'/note="i -> t (in ref. 2; x69109)"\']', u'[\'/note="i -> t (in ref. 3; caa23544/aaa98736/aaa23873)"\']', u'[\'/note="i -> t (in ref. 4; d14008)"\']', u'[\'/note="i -> t (in ref. 1; no nucleotide entry)"\']', u'[\'/note="i -> t (in ref. 1, 2 and 3)"\']']
617	CONFLICT	8	i -> v	11	[u'[\'/note="i -> v (in ref. 1; caa48364)"\']', u'[\'/note="i -> v (in ref. 4)"\']', u'[\'/note="i -> v (in ref. 1; caa56229)"\']', u'[\'/note="i -> v (in ref. 1; aaa24605 and 2; no nucleotide entry)"\']', u'[\'/note="i -> v (in ref. 5; aa sequence and 9; aa sequence)"\']', u'[\'/note="i -> v (in ref. 4; x65538)"\']', u'[\'/note="i -> v (in ref. 1 and 6)"\']', u'[\'/note="i -> v (in ref. 1; aac31…
618	CONFLICT	1	kavkgftpqam -> rgkrfyapgl	11	[u'[\'/note="kavkgftpqam -> rgkrfyapgl (in ref. 1; aaa24004)"\']']
619	CONFLICT	1	rvildsrpvha -> agdfrqppdkl	11	[u'[\'/note="rvildsrpvha -> agdfrqppdkl (in ref. 4)"\']']
620	CONFLICT	6	e -> a	11	[u'[\'/note="e -> a (in ref. 1; aaa86827)"\']', u'[\'/note="e -> a (in ref. 1; caa62859)"\']', u'[\'/note="e -> a (in ref. 3; m59471)"\']', u'[\'/note="e -> a (in ref. 3; baa04675)"\']', u'[\'/note="e -> a (in ref. 1 and 2)"\']', u'[\'/note="e -> a (in ref. 1; aaa23914)"\']']
621	CONFLICT	1	vimvfwigakm -> slwcsglarrw	11	[u'[\'/note="vimvfwigakm -> slwcsglarrw (in ref. 1; caa46824)"\']']
622	CONFLICT	1	meiswgralwr -> ma	11	[u'[\'/note="meiswgralwr -> ma (in ref. 1; aaa24218)"\']']
623	CONFLICT	1	yaafvqklfk -> mqplyrnylnkirh	10	[u'[\'/note="yaafvqklfk -> mqplyrnylnkirh (in ref. 1; aaa62070)"\']']
624	CONFLICT	1	dkimr -> vk	10	[u'[\'/note="dkimr -> vk (in ref. 1; caa25756)"\']']
625	CONFLICT	2	k -> p	10	[u'[\'/note="k -> p (in ref. 5; m31530)"\']', u'[\'/note="k -> p (in ref. 4; aa sequence)"\']']
626	CONFLICT	9	k -> n	10	[u'[\'/note="k -> n (in ref. 1; aab08691)"\']', u'[\'/note="k -> n (in ref. 3; aag26342)"\']', u'[\'/note="k -> n (in ref. 1; aaa24303)"\']', u'[\'/note="k -> n (in ref. 3; aaa23784)"\']', u'[\'/note="k -> n (in ref. 2; caa79667)"\']', u'[\'/note="k -> n (in ref. 1; aab28778)"\']', u'[\'/note="k -> n (in ref. 1; aa sequence)"\']', u'[\'/note="k -> n (in ref. 1; aac36870)"\']', u'[\'/note="k -> n …
627	CONFLICT	1	alylfawsts -> gavsvrmvll	10	[u'[\'/note="alylfawsts -> gavsvrmvll (in ref. 1; caa48360)"\']']
628	CONFLICT	1	thgdq -> darrs	10	[u'[\'/note="thgdq -> darrs (in ref. 1; aaa23904)"\']']
629	CONFLICT	5	g -> s	10	[u'[\'/note="g -> s (in ref. 1; baa00517)"\']', u'[\'/note="g -> s (in ref. 1; caa23666 and 2; caa23671)"\']', u'[\'/note="g -> s (in ref. 6; aa sequence)"\']', u'[\'/note="g -> s (in ref. 1; aaa23462)"\']', u'[\'/note="g -> s (in ref. 1; aaa24649)"\']']
630	CONFLICT	1	alpdg -> cpagc	10	[u'[\'/note="alpdg -> cpagc (in ref. 3; caa32600)"\']']
631	CONFLICT	5	n -> s	10	[u'[\'/note="n -> s (in ref. 1; aaa24766)"\']', u'[\'/note="n -> s (in ref. 1; caa23585)"\']', u'[\'/note="n -> s (in ref. 1; caa56229)"\']', u'[\'/note="n -> s (in ref. 2 and 3)"\']', u'[\'/note="n -> s (in ref. 1; cac44036)"\']']
632	CONFLICT	1	n -> f	10	[u'[\'/note="n -> f (in ref. 2; aa sequence)"\']']
633	CONFLICT	1	airvvlaiia -> qvrrgagdyr	10	[u'[\'/note="airvvlaiia -> qvrrgagdyr (in ref. 1; caa48373)"\']']
634	CONFLICT	1	y -> c	10	[u'[\'/note="y -> c (in ref. 2; caa46505)"\']']
635	CONFLICT	4	y -> s	10	[u'[\'/note="y -> s (in ref. 2; baa14929)"\']', u'[\'/note="y -> s (in ref. 1; x56310)"\']', u'[\'/note="y -> s (in ref. 5; baa00645)"\']', u'[\'/note="y -> s (in ref. 1; caa34807)"\']']
636	CONFLICT	1	gtsgd -> apavt	10	[u'[\'/note="gtsgd -> apavt (in ref. 1 and 2)"\']']
637	CONFLICT	1	s -> f	10	[u'[\'/note="s -> f (in ref. 1; aaa24624)"\']']
638	CONFLICT	1	inrnf -> hvt	10	[u'[\'/note="inrnf -> hvt (in ref. 3; aaa24096)"\']']
639	CONFLICT	1	galda -> rgagr	10	[u'[\'/note="galda -> rgagr (in ref. 5; m15273)"\']']
640	CONFLICT	6	r -> h	10	[u'[\'/note="r -> h (in ref. 1 and 2)"\']', u'[\'/note="r -> h (in ref. 1; aaa16429)"\']', u'[\'/note="r -> h (in ref. 1; caa29642)"\']', u'[\'/note="r -> h (in ref. 1; baa13053)"\']', u'[\'/note="r -> h (in ref. 1; baa07685)"\']', u'[\'/note="r -> h (in ref. 1; caa28481)"\']']
641	CONFLICT	1	aeahl -> veghv	10	[u'[\'/note="aeahl -> veghv (in ref. 3; aaa24096)"\']']
642	CONFLICT	5	r -> t	10	[u'[\'/note="r -> t (in ref. 1; aaa23790)"\']', u'[\'/note="r -> t (in ref. 1; caa48369)"\']', u'[\'/note="r -> t (in ref. 1; aaa24524)"\']', u'[\'/note="r -> t (in ref. 1; caa25948)"\']', u'[\'/note="r -> t (in ref. 4; x65538)"\']']
643	CONFLICT	6	r -> s	10	[u'[\'/note="r -> s (in ref. 5)"\']', u'[\'/note="r -> s (in ref. 1; caa60101)"\']', u'[\'/note="r -> s (in ref. 1; aac17835)"\']', u'[\'/note="r -> s (in ref. 1; caa42498)"\']', u'[\'/note="r -> s (in ref. 6; aa sequence)"\']', u'[\'/note="r -> s (in ref. 1; aaa24301)"\']']
644	CONFLICT	1	gwrla -> lafr	10	[u'[\'/note="gwrla -> lafr (in ref. 1; aaa23904)"\']']
645	CONFLICT	2	lp -> fa	10	[u'[\'/note="lp -> fa (in ref. 2; aaa67617)"\']', u'[\'/note="lp -> fa (in ref. 5; caa38854)"\']']
646	CONFLICT	4	l -> h	10	[u'[\'/note="l -> h (in ref. 1; x56310)"\']', u'[\'/note="l -> h (in ref. 3; d42020)"\']', u'[\'/note="l -> h (in ref. 3; caa32595 and 4; aaa24663)"\']', u'[\'/note="l -> h (in ref. 5; caa23581)"\']']
647	CONFLICT	8	l -> r	10	[u'[\'/note="l -> r (in ref. 1; caa48365)"\']', u'[\'/note="l -> r (in ref. 5)"\']', u'[\'/note="l -> r (in ref. 2; no nucleotide entry)"\']', u'[\'/note="l -> r (in ref. 2)"\']', u'[\'/note="l -> r (in ref. 1; caa52095)"\']', u'[\'/note="l -> r (in ref. 1; aaa23517)"\']', u'[\'/note="l -> r (in ref. 6; x56307)"\']', u'[\'/note="l -> r (in ref. 1; aab46944)"\']']
648	CONFLICT	1	gaklividpr -> rreadcdrsc	10	[u'[\'/note="gaklividpr -> rreadcdrsc (in ref. 1; aab03027)"\']']
649	CONFLICT	1	lrgipalpag -> cvvfrryrla	10	[u'[\'/note="lrgipalpag -> cvvfrryrla (in ref. 1; aaa18300)"\']']
650	CONFLICT	1	sl -> rp	10	[u'[\'/note="sl -> rp (in ref. 1 and 3)"\']']
651	CONFLICT	1	aeigavimpp -> grnrcgdyas	10	[u'[\'/note="aeigavimpp -> grnrcgdyas (in ref. 1; aaa23970)"\']']
652	CONFLICT	8	d -> h	10	[u'[\'/note="d -> h (in ref. 1; aak62973)"\']', u'[\'/note="d -> h (in ref. 1; aaa23904)"\']', u'[\'/note="d -> h (in ref. 4; l40788)"\']', u'[\'/note="d -> h (in ref. 1; aaa16155)"\']', u'[\'/note="d -> h (in ref. 1; aaa23878)"\']', u'[\'/note="d -> h (in ref. 2; aaa24199)"\']', u'[\'/note="d -> h (in ref. 2; aaa24023)"\']', u'[\'/note="d -> h (in ref. 1; aaa24301)"\']']
653	CONFLICT	1	vgyta -> sgvtpl	10	[u'[\'/note="vgyta -> sgvtpl (in ref. 1; caa48166)"\']']
654	CONFLICT	5	g -> c	9	[u'[\'/note="g -> c (in ref. 2; aaa24014)"\']', u'[\'/note="g -> c (in ref. 1; caa31216)"\']', u'[\'/note="g -> c (in ref. 1; aaa85770)"\']', u'[\'/note="g -> c (in ref. 1; caa35616)"\']', u'[\'/note="g -> c (in ref. 1; aaa24095)"\']']
655	CONFLICT	1	eri -> dgl	9	[u'[\'/note="eri -> dgl (in ref. 1)"\']']
656	CONFLICT	5	h -> y	9	[u'[\'/note="h -> y (in ref. 1; aab18051)"\']', u'[\'/note="h -> y (in ref. 1 and 2)"\']', u'[\'/note="h -> y (in ref. 4; caa86019)"\']', u'[\'/note="h -> y (in ref. 2; aac09327)"\']', u'[\'/note="h -> y (in ref. 1; caa58754)"\']']
657	CONFLICT	1	fgdilnlvg -> rtdrnakll	9	[u'[\'/note="fgdilnlvg -> rtdrnakll (in ref. 4; aaa24426)"\']']
658	CONFLICT	1	dddpqasne -> rtdpgiptk	9	[u'[\'/note="dddpqasne -> rtdpgiptk (in ref. 2)"\']']
659	CONFLICT	1	sipentvia -> lfrkychc	9	[u'[\'/note="sipentvia -> lfrkychc (in ref. 1; aac31635)"\']']
660	CONFLICT	1	dfcrdplah -> aflprsagd	9	[u'[\'/note="dfcrdplah -> aflprsagd (in ref. 1; aaa23522)"\']']
661	CONFLICT	1	llvwldeae -> c	9	[u'[\'/note="llvwldeae -> c (in ref. 2)"\']']
662	CONFLICT	4	l -> w	9	[u'[\'/note="l -> w (in ref. 2; aaa23654)"\']', u'[\'/note="l -> w (in ref. 1; aaa83835)"\']', u'[\'/note="l -> w (in ref. 5; aaa23875)"\']', u'[\'/note="l -> w (in ref. 1; u38702)"\']']
663	CONFLICT	1	ksairnrvk -> rapsvtals	9	[u'[\'/note="ksairnrvk -> rapsvtals (in ref. 1; aaa62791)"\']']
664	CONFLICT	3	v -> c	8	[u'[\'/note="v -> c (in ref. 1; aac13413)"\']', u'[\'/note="v -> c (in ref. 1; aaa85770)"\']', u'[\'/note="v -> c (in ref. 1; aaa23905)"\']']
665	CONFLICT	1	vprr -> stpc	8	[u'[\'/note="vprr -> stpc (in ref. 1)"\']']
666	CONFLICT	1	q -> a	8	[u'[\'/note="q -> a (in ref. 4; aac77833)"\']']
667	CONFLICT	1	dgpsqvny -> mvhpr	8	[u'[\'/note="dgpsqvny -> mvhpr (in ref. 1)"\']']
668	CONFLICT	1	ttlp -> stls	8	[u'[\'/note="ttlp -> stls (in ref. 1; u38702)"\']']
669	CONFLICT	1	gsrnrasg -> vpatvpa	8	[u'[\'/note="gsrnrasg -> vpatvpa (in ref. 1; baa03140)"\']']
670	CONFLICT	1	tgeh -> hge	8	[u'[\'/note="tgeh -> hge (in ref. 1; aa sequence)"\']']
671	CONFLICT	1	hggg -> gggh	8	[u'[\'/note="hggg -> gggh (in ref. 4; aa sequence)"\']']
672	CONFLICT	1	mr -> ia	8	[u'[\'/note="mr -> ia (in ref. 1; aad10865)"\']']
673	CONFLICT	1	tlsadatp -> hlkrrcht	8	[u'[\'/note="tlsadatp -> hlkrrcht (in ref. 1 and 2)"\']']
674	CONFLICT	1	ma -> rv	8	[u'[\'/note="ma -> rv (in ref. 5; m31532)"\']']
675	CONFLICT	4	v -> g	8	[u'[\'/note="v -> g (in ref. 1; caa25817 and 3; caa47280)"\']', u'[\'/note="v -> g (in ref. 4; aaa81026)"\']', u'[\'/note="v -> g (in ref. 1; caa31216)"\']', u'[\'/note="v -> g (in ref. 5; aaa23933)"\']']
676	CONFLICT	1	ke -> bk	8	[u'[\'/note="ke -> bk (in ref. 10; aa sequence)"\']']
677	CONFLICT	1	vvdc -> lvig	8	[u'[\'/note="vvdc -> lvig (in ref. 2; aaa97510)"\']']
678	CONFLICT	1	nqgngtsq -> dqdtgity	8	[u'[\'/note="nqgngtsq -> dqdtgity (in ref. 4; x65538)"\']']
679	CONFLICT	4	mr -> ig	8	[u'[\'/note="mr -> ig (in ref. 1; aac36845)"\']', u'[\'/note="mr -> ig (in ref. 1; aaa24503)"\']', u'[\'/note="mr -> ig (in ref. 2; caa46229)"\']', u'[\'/note="mr -> ig (in ref. 1; caa46823)"\']']
680	CONFLICT	1	gd -> dg	8	[u'[\'/note="gd -> dg (in ref. 1; caa26356)"\']']
681	CONFLICT	3	t -> q	8	[u'[\'/note="t -> q (in ref. 1; caa48366)"\']', u'[\'/note="t -> q (in ref. 1; aaa23647)"\']', u'[\'/note="t -> q (in ref. 1; caa68181)"\']']
682	CONFLICT	1	raam -> aar	8	[u'[\'/note="raam -> aar (in ref. 1; aab18566)"\']']
683	CONFLICT	2	i -> y	8	[u'[\'/note="i -> y (in ref. 1; caa57795)"\']', u'[\'/note="i -> y (in ref. 1; aaa24098)"\']']
684	CONFLICT	3	m -> l	8	[u'[\'/note="m -> l (in ref. 1; caa23660/aaa83914)"\']', u'[\'/note="m -> l (in ref. 1; aaa23650)"\']', u'[\'/note="m -> l (in ref. 6; x56307)"\']']
685	CONFLICT	2	t -> d	8	[u'[\'/note="t -> d (in ref. 8; aa sequence)"\']', u'[\'/note="t -> d (in ref. 5; aa sequence)"\']']
686	CONFLICT	1	qessadka -> rkaapiklkadasgagpvasaprf	8	[u'[\'/note="qessadka -> rkaapiklkadasgagpvasaprf (in ref. 4; m24278)"\']']
687	CONFLICT	1	plvrwlrg -> rwcagyav	8	[u'[\'/note="plvrwlrg -> rwcagyav (in ref. 1; aaa57890)"\']']
688	CONFLICT	1	gs -> vg	8	[u'[\'/note="gs -> vg (in ref. 1; aaa67589)"\']']
689	CONFLICT	5	w -> r	8	[u'[\'/note="w -> r (in ref. 1; aaa23998)"\']', u'[\'/note="w -> r (in ref. 5; aab59147)"\']', u'[\'/note="w -> r (in ref. 1 and 2)"\']', u'[\'/note="w -> r (in ref. 1; aaa23760)"\']', u'[\'/note="w -> r (in ref. 2; u01827)"\']']
690	CONFLICT	1	qa -> tg	8	[u'[\'/note="qa -> tg (in ref. 1; aaa24676 and 2; caa34096)"\']']
691	CONFLICT	1	ke -> egrlslllgplvn	8	[u'[\'/note="ke -> egrlslllgplvn (in ref. 6; baa04676)"\']']
692	CONFLICT	1	st -> qa	8	[u'[\'/note="st -> qa (in ref. 1, 2 and 3; aaa57877)"\']']
693	CONFLICT	3	h -> l	8	[u'[\'/note="h -> l (in ref. 1; aaa23651)"\']', u'[\'/note="h -> l (in ref. 1; aaa64939)"\']', u'[\'/note="h -> l (in ref. 1; aac36924)"\']']
694	CONFLICT	2	e -> f	8	[u'[\'/note="e -> f (in ref. 5)"\']', u'[\'/note="e -> f (in ref. 1; aa sequence)"\']']
695	CONFLICT	3	ep -> da	8	[u'[\'/note="ep -> da (in ref. 1; aab96336)"\']', u'[\'/note="ep -> da (in ref. 1; aaa24508)"\']', u'[\'/note="ep -> da (in ref. 1; caa48373)"\']']
696	CONFLICT	7	p -> l	8	[u'[\'/note="p -> l (in ref. 1; caa23606)"\']', u'[\'/note="p -> l (in ref. 1; aaa24634)"\']', u'[\'/note="p -> l (in ref. 3)"\']', u'[\'/note="p -> l (in ref. 1; caa52095)"\']', u'[\'/note="p -> l (in ref. 1; aac36881)"\']', u'[\'/note="p -> l (in ref. 2; caa35488)"\']', u'[\'/note="p -> l (in ref. 1; caa45522)"\']']
697	CONFLICT	1	aaia -> sds	8	[u'[\'/note="aaia -> sds (in ref. 1; aaa23996)"\']']
698	CONFLICT	1	lr -> sl	8	[u'[\'/note="lr -> sl (in ref. 2 and 3)"\']']
699	CONFLICT	1	dailngsl -> rrhpqrfv	8	[u'[\'/note="dailngsl -> rrhpqrfv (in ref. 4)"\']']
700	CONFLICT	1	wp -> ca	8	[u'[\'/note="wp -> ca (in ref. 1; caa60101)"\']']
701	CONFLICT	1	ca -> sr	8	[u'[\'/note="ca -> sr (in ref. 2)"\']']
702	CONFLICT	1	eriegvef -> dalkvlns	8	[u'[\'/note="eriegvef -> dalkvlns (in ref. 5; aaa23818)"\']']
703	CONFLICT	1	cv -> wl	8	[u'[\'/note="cv -> wl (in ref. 1; caa31413)"\']']
704	CONFLICT	2	kh -> nd	8	[u'[\'/note="kh -> nd (in ref. 1; aaa23905)"\']', u'[\'/note="kh -> nd (in ref. 4; l06182)"\']']
705	CONFLICT	1	as -> gf	8	[u'[\'/note="as -> gf (in ref. 1; caa27583)"\']']
706	CONFLICT	1	se -> vq	8	[u'[\'/note="se -> vq (in ref. 1; caa40776)"\']']
707	CONFLICT	1	rglepsel -> twsrtqra	8	[u'[\'/note="rglepsel -> twsrtqra (in ref. 1 and 3)"\']']
708	CONFLICT	2	mh -> id	8	[u'[\'/note="mh -> id (in ref. 1)"\']', u'[\'/note="mh -> id (in ref. 1; aaa23952)"\']']
709	CONFLICT	1	iiihyvpa -> hyhslrpw	8	[u'[\'/note="iiihyvpa -> hyhslrpw (in ref. 5; aaa24436)"\']']
710	CONFLICT	1	tpqp -> sgrna	8	[u'[\'/note="tpqp -> sgrna (in ref. 1; aaa23514)"\']']
711	CONFLICT	1	ayga -> pmar	8	[u'[\'/note="ayga -> pmar (in ref. 1 and 7)"\']']
712	CONFLICT	1	plvq -> aagn	8	[u'[\'/note="plvq -> aagn (in ref. 1; caa23565)"\']']
713	CONFLICT	1	el -> ap	8	[u'[\'/note="el -> ap (in ref. 5; m31530)"\']']
714	CONFLICT	1	at -> p	8	[u'[\'/note="at -> p (in ref. 1; aaa67589)"\']']
715	CONFLICT	1	sr -> tp	8	[u'[\'/note="sr -> tp (in ref. 2; aaa23654)"\']']
716	CONFLICT	2	aq -> e	8	[u'[\'/note="aq -> e (in ref. 1; aaa23883)"\']', u'[\'/note="aq -> e (in ref. 1; baa07685)"\']']
717	CONFLICT	2	g -> n	7	[u'[\'/note="g -> n (in ref. 1; aa sequence)"\']', u'[\'/note="g -> n (in ref. 4; no nucleotide entry and 5; aaa03208)"\']']
718	CONFLICT	2	n -> i	7	[u'[\'/note="n -> i (in ref. 1; aab18249)"\']', u'[\'/note="n -> i (in ref. 1; aaa24073)"\']']
719	CONFLICT	1	aaavlak -> qqrcwrnkrkrgdkq	7	[u'[\'/note="aaavlak -> qqrcwrnkrkrgdkq (in ref. 4)"\']']
720	CONFLICT	3	m -> s	7	[u'[\'/note="m -> s (in ref. 1; caa23585)"\']', u'[\'/note="m -> s (in ref. 4; caa51730)"\']', u'[\'/note="m -> s (in ref. 1; aaa24485)"\']']
721	CONFLICT	1	ammnkkk -> g	7	[u'[\'/note="ammnkkk -> g (in ref. 1; caa39636)"\']']
722	CONFLICT	3	h -> n	7	[u'[\'/note="h -> n (in ref. 2; aab27925)"\']', u'[\'/note="h -> n (in ref. 1; aac45723)"\']', u'[\'/note="h -> n (in ref. 3; aaa35359)"\']']
723	CONFLICT	1	gwwfwdp -> rlvvlgs	7	[u'[\'/note="gwwfwdp -> rlvvlgs (in ref. 1; caa51045)"\']']
724	CONFLICT	1	i -> f	7	[u'[\'/note="i -> f (in ref. 3; caa23592)"\']']
725	CONFLICT	2	l -> y	7	[u'[\'/note="l -> y (in ref. 7; aa sequence)"\']', u'[\'/note="l -> y (in ref. 4; caa44554)"\']']
726	CONFLICT	1	gkvdnka -> qsgq	7	[u'[\'/note="gkvdnka -> qsgq (in ref. 2; aaa23752)"\']']
727	CONFLICT	1	lrfgffa -> calassp	7	[u'[\'/note="lrfgffa -> calassp (in ref. 1; caa52048)"\']']
728	CONFLICT	1	ermqlig -> drahaadc	7	[u'[\'/note="ermqlig -> drahaadc (in ref. 1; aa sequence)"\']']
729	CONFLICT	1	d -> f	7	[u'[\'/note="d -> f (in ref. 9; aa sequence)"\']']
730	CONFLICT	1	gevvtg -> vrw	6	[u'[\'/note="gevvtg -> vrw (in ref. 5; l35149)"\']']
731	CONFLICT	1	lekala -> wkkrs	6	[u'[\'/note="lekala -> wkkrs (in ref. 1; aaa24004)"\']']
732	CONFLICT	1	fre -> lprvskhlserpvsseagffcaq	6	[u'[\'/note="fre -> lprvskhlserpvsseagffcaq (in ref. 1; caa34435)"\']']
733	CONFLICT	4	t -> k	6	[u'[\'/note="t -> k (in ref. 1; caa48366)"\']', u'[\'/note="t -> k (in ref. 2)"\']', u'[\'/note="t -> k (in ref. 4; bae77933)"\']', u'[\'/note="t -> k (in ref. 2; aab18572)"\']']
734	CONFLICT	5	k -> r	6	[u'[\'/note="k -> r (in ref. 1; caa56229)"\']', u'[\'/note="k -> r (in ref. 2; aak64508)"\']', u'[\'/note="k -> r (in ref. 5)"\']', u'[\'/note="k -> r (in ref. 1; aaa23600/aaa72540 and 2; caa31687)"\']', u'[\'/note="k -> r (in ref. 1; aaa24301)"\']']
735	CONFLICT	1	fvlvqp -> lywynr	6	[u'[\'/note="fvlvqp -> lywynr (in ref. 1; caa37070)"\']']
736	CONFLICT	1	saa -> nar	6	[u'[\'/note="saa -> nar (in ref. 1; caa25321)"\']']
737	CONFLICT	1	qdatah -> rtllrt	6	[u'[\'/note="qdatah -> rtllrt (in ref. 1; caa35968)"\']']
738	CONFLICT	1	per -> av	6	[u'[\'/note="per -> av (in ref. 1; aac36932)"\']']
739	CONFLICT	1	atkvif -> grrlsl	6	[u'[\'/note="atkvif -> grrlsl (in ref. 1; aaa24301)"\']']
740	CONFLICT	1	al -> sv	6	[u'[\'/note="al -> sv (in ref. 5; m58000)"\']']
741	CONFLICT	1	ifa -> lll	6	[u'[\'/note="ifa -> lll (in ref. 1; caa28481)"\']']
742	CONFLICT	1	gvt -> ala	6	[u'[\'/note="gvt -> ala (in ref. 1; aaa23480)"\']']
743	CONFLICT	1	lae -> rg	6	[u'[\'/note="lae -> rg (in ref. 1; caa25755 and 5; caa38854)"\']']
744	CONFLICT	1	v -> f	6	[u'[\'/note="v -> f (in ref. 1; aaa23892 and 6; aa sequence)"\']']
745	CONFLICT	1	eap -> adt	6	[u'[\'/note="eap -> adt (in ref. 1; caa43921)"\']']
746	CONFLICT	4	v -> m	6	[u'[\'/note="v -> m (in ref. 4; k02672)"\']', u'[\'/note="v -> m (in ref. 1; aaa23808/aaa23802)"\']', u'[\'/note="v -> m (in ref. 2; caa23521)"\']', u'[\'/note="v -> m (in ref. 1; caa25947)"\']']
747	CONFLICT	1	ria -> gs	6	[u'[\'/note="ria -> gs (in ref. 1; aaa23625)"\']']
748	CONFLICT	1	siltgp -> amlsgt	6	[u'[\'/note="siltgp -> amlsgt (in ref. 4; x65538)"\']']
749	CONFLICT	1	aggnve -> laqcgs	6	[u'[\'/note="aggnve -> laqcgs (in ref. 4; caa57686)"\']']
750	CONFLICT	1	n -> nm	6	[u'[\'/note="n -> nm (in ref. 2; aac09324)"\']']
751	CONFLICT	1	s -> h	6	[u'[\'/note="s -> h (in ref. 1; caa52049)"\']']
752	CONFLICT	3	s -> a	6	[u'[\'/note="s -> a (in ref. 5)"\']', u'[\'/note="s -> a (in ref. 1)"\']', u'[\'/note="s -> a (in ref. 3; aaa23991)"\']']
753	CONFLICT	1	dvh -> aaa	6	[u'[\'/note="dvh -> aaa (in ref. 1; aaa23915)"\']']
754	CONFLICT	1	rlvakl -> sgrev	6	[u'[\'/note="rlvakl -> sgrev (in ref. 1; caa32451)"\']']
755	CONFLICT	1	alpism -> rcqsvcntrwnnevgldfl	6	[u'[\'/note="alpism -> rcqsvcntrwnnevgldfl (in ref. 1; caa29489 and 2; aaa97269)"\']']
756	CONFLICT	1	qlq -> scsnmtpddfssgefl	6	[u'[\'/note="qlq -> scsnmtpddfssgefl (in ref. 1; caa25860)"\']']
757	CONFLICT	1	wakvge -> grk	6	[u'[\'/note="wakvge -> grk (in ref. 2)"\']']
758	CONFLICT	3	kq -> ne	6	[u'[\'/note="kq -> ne (in ref. 1; aaa83891)"\']', u'[\'/note="kq -> ne (in ref. 1; aaa57901)"\']', u'[\'/note="kq -> ne (in ref. 1; aaa83888/aaa58216)"\']']
759	CONFLICT	2	ll -> fv	6	[u'[\'/note="ll -> fv (in ref. 1; aaa97504)"\']', u'[\'/note="ll -> fv (in ref. 1; aaa16155)"\']']
760	CONFLICT	1	ras -> aq	6	[u'[\'/note="ras -> aq (in ref. 2; aaa23493)"\']']
761	CONFLICT	1	akr -> ls	6	[u'[\'/note="akr -> ls (in ref. 1; caa29574)"\']']
762	CONFLICT	1	gwy -> rmvc	6	[u'[\'/note="gwy -> rmvc (in ref. 1; aaa23511)"\']']
763	CONFLICT	1	rhs -> civ	6	[u'[\'/note="rhs -> civ (in ref. 9; aa sequence)"\']']
764	CONFLICT	1	kyr -> nia	6	[u'[\'/note="kyr -> nia (in ref. 1; aaa97504)"\']']
765	CONFLICT	3	p -> q	6	[u'[\'/note="p -> q (in ref. 1)"\']', u'[\'/note="p -> q (in ref. 1; aaa56878)"\']', u'[\'/note="p -> q (in ref. 2; u01827)"\']']
766	CONFLICT	1	sei -> wgs	6	[u'[\'/note="sei -> wgs (in ref. 8; aaa24359)"\']']
767	CONFLICT	1	aqa -> tqv	6	[u'[\'/note="aqa -> tqv (in ref. 1; caa56231)"\']']
768	CONFLICT	1	pqdqvv -> hqpqva	6	[u'[\'/note="pqdqvv -> hqpqva (in ref. 5)"\']']
769	CONFLICT	1	asp -> gnr	6	[u'[\'/note="asp -> gnr (in ref. 1)"\']']
770	CONFLICT	1	vlm -> all	6	[u'[\'/note="vlm -> all (in ref. 1; u38702)"\']']
771	CONFLICT	1	qmw -> adv	6	[u'[\'/note="qmw -> adv (in ref. 1; caa60103)"\']']
772	CONFLICT	2	m -> mm	6	[u'[\'/note="m -> mm (in ref. 1 and 2)"\']', u'[\'/note="m -> mm (in ref. 1; aa sequence)"\']']
773	CONFLICT	1	rrprkr -> lvrvs	6	[u'[\'/note="rrprkr -> lvrvs (in ref. 1; caa33253 and 2; caa79667)"\']']
774	CONFLICT	2	wl -> cv	6	[u'[\'/note="wl -> cv (in ref. 1; aaa67588)"\']', u'[\'/note="wl -> cv (in ref. 2; aaa58132)"\']']
775	CONFLICT	1	pdpekh -> trpgka	6	[u'[\'/note="pdpekh -> trpgka (in ref. 1)"\']']
776	CONFLICT	1	tetgar -> pkagap	6	[u'[\'/note="tetgar -> pkagap (in ref. 1)"\']']
777	CONFLICT	1	asw -> g	6	[u'[\'/note="asw -> g (in ref. 2; caa25718)"\']']
778	CONFLICT	1	nairrd -> klsvvm	6	[u'[\'/note="nairrd -> klsvvm (in ref. 1; aaa24301)"\']']
779	CONFLICT	2	sv -> rl	6	[u'[\'/note="sv -> rl (in ref. 1; caa40708)"\']', u'[\'/note="sv -> rl (in ref. 1)"\']']
780	CONFLICT	1	qf -> sv	6	[u'[\'/note="qf -> sv (in ref. 1; aac36918)"\']']
781	CONFLICT	1	el -> sv	6	[u'[\'/note="el -> sv (in ref. 2; aaa23965)"\']']
782	CONFLICT	1	pkdkyi -> qkisis	6	[u'[\'/note="pkdkyi -> qkisis (in ref. 1; aaa24301)"\']']
783	CONFLICT	1	yttgyp -> tlpgir	6	[u'[\'/note="yttgyp -> tlpgir (in ref. 1; aac44131)"\']']
784	CONFLICT	1	tlstd -> afpr	5	[u'[\'/note="tlstd -> afpr (in ref. 1; aaa24301)"\']']
785	CONFLICT	1	feggc -> lkaag	5	[u'[\'/note="feggc -> lkaag (in ref. 1; aaa24301)"\']']
786	CONFLICT	1	gderp -> amnar	5	[u'[\'/note="gderp -> amnar (in ref. 4; d17576)"\']']
787	CONFLICT	2	k -> h	5	[u'[\'/note="k -> h (in ref. 5; m31530)"\']', u'[\'/note="k -> h (in ref. 5; aa sequence and 9; aa sequence)"\']']
788	CONFLICT	1	isdta -> tlkci	5	[u'[\'/note="isdta -> tlkci (in ref. 4; baa07424)"\']']
789	CONFLICT	1	sesga -> tkag	5	[u'[\'/note="sesga -> tkag (in ref. 4; aaa24003)"\']']
790	CONFLICT	2	f -> c	5	[u'[\'/note="f -> c (in ref. 1; caa26356)"\']', u'[\'/note="f -> c (in ref. 1; caa88140)"\']']
791	CONFLICT	2	a -> l	5	[u'[\'/note="a -> l (in ref. 2; caa53207)"\']', u'[\'/note="a -> l (in ref. 1; aaa78908)"\']']
792	CONFLICT	2	g -> q	5	[u'[\'/note="g -> q (in ref. 5; aa sequence)"\']', u'[\'/note="g -> q (in ref. 6; aa sequence)"\']']
793	CONFLICT	2	q -> n	5	[u'[\'/note="q -> n (in ref. 8; aa sequence)"\']', u'[\'/note="q -> n (in ref. 5; aa sequence)"\']']
794	CONFLICT	1	mdkqr -> dgqat	5	[u'[\'/note="mdkqr -> dgqat (in ref. 3)"\']']
795	CONFLICT	1	eaihd -> sds	5	[u'[\'/note="eaihd -> sds (in ref. 1; aaa21592)"\']']
796	CONFLICT	1	varpr -> gxgpg	5	[u'[\'/note="varpr -> gxgpg (in ref. 3; aaa62053)"\']']
797	CONFLICT	4	s -> d	5	[u'[\'/note="s -> d (in ref. 6; aa sequence)"\']', u'[\'/note="s -> d (in ref. 4; aa sequence)"\']', u'[\'/note="s -> d (in ref. 7; aaa17054)"\']', u'[\'/note="s -> d (in ref. 1; aaa66342)"\']']
798	CONFLICT	1	sgtik -> aeqkr	5	[u'[\'/note="sgtik -> aeqkr (in ref. 4; x65538)"\']']
799	CONFLICT	3	s -> p	5	[u'[\'/note="s -> p (in ref. 1; caa31818)"\']', u'[\'/note="s -> p (in ref. 5; aaa23875)"\']', u'[\'/note="s -> p (in ref. 1)"\']']
800	CONFLICT	3	s -> q	5	[u'[\'/note="s -> q (in ref. 4; k02672)"\']', u'[\'/note="s -> q (in ref. 1 and 2)"\']', u'[\'/note="s -> q (in ref. 1; aaa23915)"\']']
801	CONFLICT	3	i -> s	5	[u'[\'/note="i -> s (in ref. 5; aaa23875)"\']', u'[\'/note="i -> s (in ref. 3; aaa24096)"\']', u'[\'/note="i -> s (in ref. 1; aaa23762)"\']']
802	CONFLICT	3	m -> t	5	[u'[\'/note="m -> t (in ref. 4; aat42474)"\']', u'[\'/note="m -> t (in ref. 2; caa27610)"\']', u'[\'/note="m -> t (in ref. 3)"\']']
803	CONFLICT	2	w -> l	5	[u'[\'/note="w -> l (in ref. 1; caa27583)"\']', u'[\'/note="w -> l (in ref. 1; caa51045)"\']']
804	CONFLICT	3	e -> r	5	[u'[\'/note="e -> r (in ref. 1; caa31216)"\']', u'[\'/note="e -> r (in ref. 1; aaa24098)"\']', u'[\'/note="e -> r (in ref. 2)"\']']
805	CONFLICT	3	p -> g	5	[u'[\'/note="p -> g (in ref. 4)"\']', u'[\'/note="p -> g (in ref. 4; l40788)"\']', u'[\'/note="p -> g (in ref. 1; aaa23708)"\']']
806	CONFLICT	1	atpad -> lrlrtkyfpdnvsvlnaapgsccpgy	5	[u'[\'/note="atpad -> lrlrtkyfpdnvsvlnaapgsccpgy (in ref. 1; aa sequence)"\']']
807	CONFLICT	4	l -> f	5	[u'[\'/note="l -> f (in ref. 1; baa14304)"\']', u'[\'/note="l -> f (in ref. 1 and 2)"\']', u'[\'/note="l -> f (in ref. 2; aac77838)"\']', u'[\'/note="l -> f (in ref. 1; caa47934)"\']']
808	CONFLICT	1	aggvv -> rrvawl	5	[u'[\'/note="aggvv -> rrvawl (in ref. 1; aaa24705)"\']']
809	CONFLICT	3	d -> i	5	[u'[\'/note="d -> i (in ref. 6; aa sequence)"\']', u'[\'/note="d -> i (in ref. 1; baa02148)"\']', u'[\'/note="d -> i (in ref. 1, 2 and 3)"\']']
810	CONFLICT	1	engfa -> gkrlr	5	[u'[\'/note="engfa -> gkrlr (in ref. 1; aab03027)"\']']
811	CONFLICT	3	d -> s	5	[u'[\'/note="d -> s (in ref. 5; caa29031)"\']', u'[\'/note="d -> s (in ref. 1; aab47941)"\']', u'[\'/note="d -> s (in ref. 1, 2 and 5)"\']']
812	CONFLICT	1	nh -> hn	4	[u'[\'/note="nh -> hn (in ref. 6)"\']']
813	CONFLICT	2	rv -> al	4	[u'[\'/note="rv -> al (in ref. 1; aaa17550)"\']', u'[\'/note="rv -> al (in ref. 2; caa42043)"\']']
814	CONFLICT	1	rv -> ac	4	[u'[\'/note="rv -> ac (in ref. 1; aaa64506)"\']']
815	CONFLICT	1	rm -> agl	4	[u'[\'/note="rm -> agl (in ref. 1; aaa24319)"\']']
816	CONFLICT	1	gv -> as	4	[u'[\'/note="gv -> as (in ref. 2; aac43166)"\']']
817	CONFLICT	1	q -> s	4	[u'[\'/note="q -> s (in ref. 1; aaa24164)"\']']
818	CONFLICT	1	ea -> gt	4	[u'[\'/note="ea -> gt (in ref. 1; aaa16430)"\']']
819	CONFLICT	1	adsv -> rtvw	4	[u'[\'/note="adsv -> rtvw (in ref. 1; aa sequence)"\']']
820	CONFLICT	1	lsgi -> avgd	4	[u'[\'/note="lsgi -> avgd (in ref. 4; x53983)"\']']
821	CONFLICT	1	ggtl -> adv	4	[u'[\'/note="ggtl -> adv (in ref. 1; aaa58213)"\']']
822	CONFLICT	2	t -> p	4	[u'[\'/note="t -> p (in ref. 1 and 2)"\']', u'[\'/note="t -> p (in ref. 3; aaa69030)"\']']
823	CONFLICT	1	ae -> r	4	[u'[\'/note="ae -> r (in ref. 2; caa00968)"\']']
824	CONFLICT	3	t -> h	4	[u'[\'/note="t -> h (in ref. 1; caa29156 and 2; no nucleotide entry)"\']', u'[\'/note="t -> h (in ref. 1; aaa24276)"\']', u'[\'/note="t -> h (in ref. 1; caa60102)"\']']
825	CONFLICT	4	k -> q	4	[u'[\'/note="k -> q (in ref. 4; k02672)"\']', u'[\'/note="k -> q (in ref. 1; aa sequence)"\']', u'[\'/note="k -> q (in ref. 1; aaa23724)"\']', u'[\'/note="k -> q (in ref. 4; x65538)"\']']
826	CONFLICT	1	vf -> mc	4	[u'[\'/note="vf -> mc (in ref. 1; aaa85770)"\']']
827	CONFLICT	1	qq -> hk	4	[u'[\'/note="qq -> hk (in ref. 3; caa00967)"\']']
828	CONFLICT	2	a -> q	4	[u'[\'/note="a -> q (in ref. 1; aac43381)"\']', u'[\'/note="a -> q (in ref. 1; caa28481)"\']']
829	CONFLICT	1	rprv -> playkiaslkhtderqppllrvll	4	[u'[\'/note="rprv -> playkiaslkhtderqppllrvll (in ref. 1)"\']']
830	CONFLICT	1	c -> p	4	[u'[\'/note="c -> p (in ref. 4; aa sequence)"\']']
831	CONFLICT	1	lh -> pd	4	[u'[\'/note="lh -> pd (in ref. 1; aac36932)"\']']
832	CONFLICT	1	g -> t	4	[u'[\'/note="g -> t (in ref. 4; x57947)"\']']
833	CONFLICT	2	q -> t	4	[u'[\'/note="q -> t (in ref. 8; aa sequence)"\']', u'[\'/note="q -> t (in ref. 6; aa sequence)"\']']
834	CONFLICT	1	sa -> yl	4	[u'[\'/note="sa -> yl (in ref. 4; aa sequence)"\']']
835	CONFLICT	1	rk -> hr	4	[u'[\'/note="rk -> hr (in ref. 1; aaa16430)"\']']
836	CONFLICT	1	gfal -> alp	4	[u'[\'/note="gfal -> alp (in ref. 1; aaa68925)"\']']
837	CONFLICT	1	gy -> vi	4	[u'[\'/note="gy -> vi (in ref. 1; baa04900)"\']']
838	CONFLICT	1	n -> z	4	[u'[\'/note="n -> z (in ref. 10; aa sequence)"\']']
839	CONFLICT	1	eh -> gt	4	[u'[\'/note="eh -> gt (in ref. 1; caa34807)"\']']
840	CONFLICT	1	iy -> yi	4	[u'[\'/note="iy -> yi (in ref. 5; aa sequence)"\']']
841	CONFLICT	1	y -> i	4	[u'[\'/note="y -> i (in ref. 1)"\']']
842	CONFLICT	1	iy -> th	4	[u'[\'/note="iy -> th (in ref. 5; aaa23875)"\']']
843	CONFLICT	1	y -> t	4	[u'[\'/note="y -> t (in ref. 1; aaa24164)"\']']
844	CONFLICT	3	w -> g	4	[u'[\'/note="w -> g (in ref. 1; baa13052)"\']', u'[\'/note="w -> g (in ref. 3; aaa16375)"\']', u'[\'/note="w -> g (in ref. 5; aa sequence)"\']']
845	CONFLICT	1	mrhp -> ncaih	4	[u'[\'/note="mrhp -> ncaih (in ref. 1; caa86020)"\']']
846	CONFLICT	1	va -> as	4	[u'[\'/note="va -> as (in ref. 5; caa24910)"\']']
847	CONFLICT	1	pg -> ra	4	[u'[\'/note="pg -> ra (in ref. 2)"\']']
848	CONFLICT	1	sm -> rl	4	[u'[\'/note="sm -> rl (in ref. 1; aaa24321)"\']']
849	CONFLICT	1	ev -> rs	4	[u'[\'/note="ev -> rs (in ref. 5; m15273)"\']']
850	CONFLICT	1	mklr -> yeas	4	[u'[\'/note="mklr -> yeas (in ref. 1; no nucleotide entry)"\']']
851	CONFLICT	2	te -> rq	4	[u'[\'/note="te -> rq (in ref. 2; aaa23493 and 6; caa27956)"\', \'/note="t -> s (in ref. 1; aaa23497)"\']', u'[\'/note="te -> rq (in ref. 2; aaa23493 and 6; caa27956)"\']']
852	CONFLICT	1	as -> na	4	[u'[\'/note="as -> na (in ref. 4; aa sequence)"\']']
853	CONFLICT	2	ia -> mp	4	[u'[\'/note="ia -> mp (in ref. 1; aaa60489)"\']', u'[\'/note="ia -> mp (in ref. 4)"\']']
854	CONFLICT	1	as -> rr	4	[u'[\'/note="as -> rr (in ref. 3; caa32595 and 4; aaa24663)"\']']
855	CONFLICT	2	asaa -> hlpr	4	[u'[\'/note="a -> q (in ref. 1; aaa16429)"\', \'/note="asaa -> hlpr (in ref. 2; aaa69225)"\']', u'[\'/note="asaa -> hlpr (in ref. 2; aaa69225)"\']']
856	CONFLICT	1	di -> gv	4	[u'[\'/note="di -> gv (in ref. 1; caa31811)"\']']
857	CONFLICT	1	mg -> ip	4	[u'[\'/note="mg -> ip (in ref. 1; aaa53657)"\']']
858	CONFLICT	3	s -> i	4	[u'[\'/note="s -> i (in ref. 1; caa47260 and 5; x52890)"\']', u'[\'/note="s -> i (in ref. 2; aak64508)"\']', u'[\'/note="s -> i (in ref. 3)"\']']
859	CONFLICT	1	tl -> sv	4	[u'[\'/note="tl -> sv (in ref. 1; caa25755 and 5; caa38854)"\']']
860	CONFLICT	1	dy -> it	4	[u'[\'/note="dy -> it (in ref. 10; aaa24671)"\']']
861	CONFLICT	1	gl -> pf	4	[u'[\'/note="gl -> pf (in ref. 1; aac43381)"\']']
862	CONFLICT	1	salr -> trg	4	[u'[\'/note="salr -> trg (in ref. 1; aac36870)"\']']
863	CONFLICT	1	ns -> td	4	[u'[\'/note="ns -> td (in ref. 1; aa sequence)"\']']
864	CONFLICT	1	ql -> lt	4	[u'[\'/note="ql -> lt (in ref. 1; aaa23526)"\']']
865	CONFLICT	1	pv -> al	4	[u'[\'/note="pv -> al (in ref. 1; aaa24321)"\']']
866	CONFLICT	2	qh -> hd	4	[u'[\'/note="qh -> hd (in ref. 3; aac43435)"\']', u'[\'/note="qh -> hd (in ref. 1; caa34601)"\']']
867	CONFLICT	1	w -> c	4	[u'[\'/note="w -> c (in ref. 2; baa08441)"\']']
868	CONFLICT	2	e -> n	4	[u'[\'/note="e -> n (in ref. 1; aaa23904)"\']', u'[\'/note="e -> n (in ref. 1; aa sequence)"\']']
869	CONFLICT	1	nhla -> tiwr	4	[u'[\'/note="nhla -> tiwr (in ref. 1; caa48373)"\']']
870	CONFLICT	1	csgs -> vlvr	4	[u'[\'/note="csgs -> vlvr (in ref. 1; caa30455)"\']']
871	CONFLICT	1	ap -> vr	4	[u'[\'/note="ap -> vr (in ref. 1; caa23565)"\']']
872	CONFLICT	3	r -> i	4	[u'[\'/note="r -> i (in ref. 6; aa sequence)"\']', u'[\'/note="r -> i (in ref. 9; aa sequence)"\']', u'[\'/note="r -> i (in ref. 7; aa sequence)"\']']
873	CONFLICT	1	kr -> ng	4	[u'[\'/note="kr -> ng (in ref. 1; caa28481)"\']']
874	CONFLICT	1	gf -> sl	4	[u'[\'/note="gf -> sl (in ref. 8; aa sequence)"\']']
875	CONFLICT	1	g -> gfg	4	[u'[\'/note="g -> gfg (in ref. 1)"\']']
876	CONFLICT	1	rl -> lr	4	[u'[\'/note="rl -> lr (in ref. 1; caa31216)"\']']
877	CONFLICT	1	yk -> il	4	[u'[\'/note="yk -> il (in ref. 5; aa sequence)"\']']
878	CONFLICT	2	l -> d	4	[u'[\'/note="l -> d (in ref. 5)"\']', u'[\'/note="l -> d (in ref. 1; aaa23915)"\']']
879	CONFLICT	1	ap -> egankrgnssrltqsfhffmfepifspvnalnqpi	4	[u'[\'/note="ap -> egankrgnssrltqsfhffmfepifspvnalnqpi (in ref. 3; bae78087)"\']']
880	CONFLICT	1	ipst -> hspll	4	[u'[\'/note="ipst -> hspll (in ref. 1; baa12837)"\']']
881	CONFLICT	1	emsa -> dfsgp	4	[u'[\'/note="emsa -> dfsgp (in ref. 1; aac44131)"\']']
882	CONFLICT	1	ltqq -> kvlgslstllacqhihipyqqkfqp	4	[u'[\'/note="ltqq -> kvlgslstllacqhihipyqqkfqp (in ref. 4)"\']']
883	CONFLICT	1	salp -> lrva	4	[u'[\'/note="salp -> lrva (in ref. 1; aaa23952)"\']']
884	CONFLICT	1	rh -> pd	4	[u'[\'/note="rh -> pd (in ref. 1; caa31421)"\']']
885	CONFLICT	1	p -> ptp	4	[u'[\'/note="p -> ptp (in ref. 2)"\']']
886	CONFLICT	1	ea -> rs	4	[u'[\'/note="ea -> rs (in ref. 1; aaa23462)"\']']
887	CONFLICT	1	mgip -> dgns	4	[u'[\'/note="mgip -> dgns (in ref. 5)"\']']
888	CONFLICT	1	sv -> r	4	[u'[\'/note="sv -> r (in ref. 3; aaa24096)"\']']
889	CONFLICT	1	er -> d	4	[u'[\'/note="er -> d (in ref. 1; caa23630 and 2; caa23644)"\']']
890	CONFLICT	1	gv -> l	4	[u'[\'/note="gv -> l (in ref. 1; aaa51477)"\']']
891	CONFLICT	1	gscl -> ahaw	4	[u'[\'/note="gscl -> ahaw (in ref. 1; aaa67595)"\']']
892	CONFLICT	1	ng -> kv	4	[u'[\'/note="ng -> kv (in ref. 1; caa29155)"\']']
893	CONFLICT	1	plt -> rxd	3	[u'[\'/note="plt -> rxd (in ref. 6)"\']']
894	CONFLICT	1	sai -> ecd	3	[u'[\'/note="sai -> ecd (in ref. 1; aaa24705)"\']']
895	CONFLICT	1	aav -> rgrs	3	[u'[\'/note="aav -> rgrs (in ref. 4; k02672)"\']']
896	CONFLICT	1	etv -> ttt	3	[u'[\'/note="etv -> ttt (in ref. 7; aa sequence)"\']']
897	CONFLICT	2	k -> l	3	[u'[\'/note="k -> l (in ref. 1; caa28416)"\']', u'[\'/note="k -> l (in ref. 5; aa sequence)"\']']
898	CONFLICT	1	y -> yr	3	[u'[\'/note="y -> yr (in ref. 5; aa sequence, 6; aa sequence and 7; aa sequence)"\']']
899	CONFLICT	1	a -> ae	3	[u'[\'/note="a -> ae (in ref. 1; caa52821)"\']']
900	CONFLICT	2	c -> l	3	[u'[\'/note="c -> l (in ref. 1; caa63922)"\']', u'[\'/note="c -> l (in ref. 1, 2 and 3)"\']']
901	CONFLICT	1	dll -> lsf	3	[u'[\'/note="dll -> lsf (in ref. 4; aaa60521)"\']']
902	CONFLICT	1	gtg -> ar	3	[u'[\'/note="gtg -> ar (in ref. 1; aaa24004)"\']']
903	CONFLICT	1	c -> e	3	[u'[\'/note="c -> e (in ref. 5; aa sequence)"\']']
904	CONFLICT	1	g -> p	3	[u'[\'/note="g -> p (in ref. 1; aaa20584)"\']']
905	CONFLICT	1	gel -> acv	3	[u'[\'/note="gel -> acv (in ref. 5; aaa85768)"\']']
906	CONFLICT	1	s -> pd	3	[u'[\'/note="s -> pd (in ref. 1; aaa20584)"\']']
907	CONFLICT	1	vgw -> wl	3	[u'[\'/note="vgw -> wl (in ref. 1; caa37070)"\']']
908	CONFLICT	1	las -> tcvlilvsrlskpesedv	3	[u'[\'/note="las -> tcvlilvsrlskpesedv (in ref. 1 and 2)"\']']
909	CONFLICT	1	asg -> qr	3	[u'[\'/note="asg -> qr (in ref. 1; aaa23522)"\']']
910	CONFLICT	1	sva -> ydr	3	[u'[\'/note="sva -> ydr (in ref. 5; caa25075)"\']']
911	CONFLICT	1	afd -> gfg	3	[u'[\'/note="afd -> gfg (in ref. 1; aac44131)"\']']
912	CONFLICT	1	plr -> ac	3	[u'[\'/note="plr -> ac (in ref. 1; aaa23722)"\']']
913	CONFLICT	1	gat -> drry	3	[u'[\'/note="gat -> drry (in ref. 1; aa sequence)"\']']
914	CONFLICT	2	s -> m	3	[u'[\'/note="s -> m (in ref. 9; aa sequence)"\']', u'[\'/note="s -> m (in ref. 5; caa40098)"\']']
915	CONFLICT	1	apd -> gri	3	[u'[\'/note="apd -> gri (in ref. 3)"\']']
916	CONFLICT	1	liy -> mkh	3	[u'[\'/note="liy -> mkh (in ref. 1)"\']']
917	CONFLICT	1	rta -> ahgviiindaagryke	3	[u'[\'/note="rta -> ahgviiindaagryke (in ref. 1; aab03010)"\']']
918	CONFLICT	2	ara -> rrp	3	[u'[\'/note="a -> v (in ref. 1; aaa64433)"\', \'/note="ara -> rrp (in ref. 5)"\']', u'[\'/note="ara -> rrp (in ref. 5)"\']']
919	CONFLICT	1	lpe -> gil	3	[u'[\'/note="lpe -> gil (in ref. 4)"\']']
920	CONFLICT	1	vlr -> yc	3	[u'[\'/note="vlr -> yc (in ref. 3; aac44303)"\']']
921	CONFLICT	1	qnt -> etg	3	[u'[\'/note="qnt -> etg (in ref. 4; x65538)"\']']
922	CONFLICT	1	aaa -> qrp	3	[u'[\'/note="aaa -> qrp (in ref. 1; aac36845)"\']']
923	CONFLICT	2	h -> q	3	[u'[\'/note="h -> q (in ref. 2; aab18572)"\']', u'[\'/note="h -> q (in ref. 1; caa29883)"\']']
924	CONFLICT	1	qha -> smr	3	[u'[\'/note="qha -> smr (in ref. 4)"\']']
925	CONFLICT	3	p -> t	3	[u'[\'/note="p -> t (in ref. 1; caa27532)"\']', u'[\'/note="p -> t (in ref. 1; caa33253 and 2; caa79667)"\']', u'[\'/note="p -> t (in ref. 1; caa31531)"\']']
926	CONFLICT	1	lgi -> igmv	3	[u'[\'/note="lgi -> igmv (in ref. 1; aa sequence)"\']']
927	CONFLICT	2	f -> i	3	[u'[\'/note="f -> i (in ref. 3; aac13985)"\']', u'[\'/note="f -> i (in ref. 4)"\']']
928	CONFLICT	1	nhe -> imr	3	[u'[\'/note="nhe -> imr (in ref. 1; aac31635)"\']']
929	CONFLICT	1	l -> g	3	[u'[\'/note="l -> g (in ref. 6; aa sequence)"\']']
930	CONFLICT	1	ata -> tte	3	[u'[\'/note="ata -> tte (in ref. 2; aab18572)"\']']
931	CONFLICT	1	afn -> r	3	[u'[\'/note="afn -> r (in ref. 1; aa sequence)"\']']
932	CONFLICT	1	sek -> aknnaisgadrislrrsarfsvfvsmivdrnlpaiqivsyhhinc sffr	3	[u'[\'/note="sek -> aknnaisgadrislrrsarfsvfvsmivdrnlpaiqivsyhhinc sffr (in ref. 4)"\']']
933	CONFLICT	1	vtd -> syh	3	[u'[\'/note="vtd -> syh (in ref. 2; u01827)"\']']
934	CONFLICT	1	mse -> mt	3	[u'[\'/note="mse -> mt (in ref. 4)"\']']
935	CONFLICT	1	ete -> dprgk	3	[u'[\'/note="ete -> dprgk (in ref. 4; x65538)"\']']
936	CONFLICT	1	aig -> cyw	3	[u'[\'/note="aig -> cyw (in ref. 1)"\']']
937	CONFLICT	1	rs -> gt	2	[u'[\'/note="rs -> gt (in ref. 1; caa51663)"\']']
938	CONFLICT	1	gq -> vnnerivmvlaqfalvqghagamalcvtqyhchvsgadgcllfksg	2	[u'[\'/note="gq -> vnnerivmvlaqfalvqghagamalcvtqyhchvsgadgcllfksg (in ref. 1; no nucleotide entry)"\']']
939	CONFLICT	1	nv -> tl	2	[u'[\'/note="nv -> tl (in ref. 1 and 2)"\']']
940	CONFLICT	1	ad -> ri	2	[u'[\'/note="ad -> ri (in ref. 1)"\']']
941	CONFLICT	1	al -> rv	2	[u'[\'/note="al -> rv (in ref. 2; caa35611)"\']']
942	CONFLICT	1	wr -> c	2	[u'[\'/note="wr -> c (in ref. 1; aab95618)"\']']
943	CONFLICT	1	et -> vs	2	[u'[\'/note="et -> vs (in ref. 5)"\']']
944	CONFLICT	1	ag -> sa	2	[u'[\'/note="ag -> sa (in ref. 4; k02672)"\']']
945	CONFLICT	1	mi -> ief	2	[u'[\'/note="mi -> ief (in ref. 1; caa51229)"\']']
946	CONFLICT	1	qe -> hq	2	[u'[\'/note="qe -> hq (in ref. 2; u01827)"\']']
947	CONFLICT	2	t -> m	2	[u'[\'/note="t -> m (in ref. 1; aaa23762)"\']', u'[\'/note="t -> m (in ref. 1; aaa23760 and 5)"\']']
948	CONFLICT	1	t -> g	2	[u'[\'/note="t -> g (in ref. 6; aa sequence)"\']']
949	CONFLICT	1	lf -> c	2	[u'[\'/note="lf -> c (in ref. 1; aaa24004)"\']']
950	CONFLICT	1	ih -> ll	2	[u'[\'/note="ih -> ll (in ref. 1; caa41014)"\']']
951	CONFLICT	1	ne -> kq	2	[u'[\'/note="ne -> kq (in ref. 1; aac36870)"\']']
952	CONFLICT	1	vl -> av	2	[u'[\'/note="vl -> av (in ref. 1; aaa67594)"\']']
953	CONFLICT	1	ag -> ra	2	[u'[\'/note="ag -> ra (in ref. 1; aac77848)"\']']
954	CONFLICT	1	a -> ad	2	[u'[\'/note="a -> ad (in ref. 1; aa sequence)"\']']
955	CONFLICT	1	id -> st	2	[u'[\'/note="id -> st (in ref. 4)"\']']
956	CONFLICT	2	a -> as	2	[u'[\'/note="a -> as (in ref. 5; aaa24696)"\']', u'[\'/note="a -> as (in ref. 1; aaa23763)"\']']
957	CONFLICT	1	c -> y	2	[u'[\'/note="c -> y (in ref. 1; aac43517)"\']']
958	CONFLICT	1	ds -> er	2	[u'[\'/note="ds -> er (in ref. 4; caa40777)"\']']
959	CONFLICT	1	c -> r	2	[u'[\'/note="c -> r (in ref. 1; aaa23462)"\']']
960	CONFLICT	1	r -> dd	2	[u'[\'/note="r -> dd (in ref. 1; aaa97504)"\']']
961	CONFLICT	1	kq -> nr	2	[u'[\'/note="kq -> nr (in ref. 1; caa37071)"\']']
962	CONFLICT	1	g -> l	2	[u'[\'/note="g -> l (in ref. 4; aa sequence)"\']']
963	CONFLICT	1	la -> wr	2	[u'[\'/note="la -> wr (in ref. 1; aaa24455)"\']']
964	CONFLICT	1	g -> f	2	[u'[\'/note="g -> f (in ref. 4; aa sequence)"\']']
965	CONFLICT	1	g -> w	2	[u'[\'/note="g -> w (in ref. 1; u38702)"\']']
966	CONFLICT	1	mp -> na	2	[u'[\'/note="mp -> na (in ref. 2; m30139)"\']']
967	CONFLICT	1	eq -> de	2	[u'[\'/note="eq -> de (in ref. 4; x53863)"\']']
968	CONFLICT	1	rw -> va	2	[u'[\'/note="rw -> va (in ref. 1; aaa62046)"\']']
969	CONFLICT	1	eq -> dr	2	[u'[\'/note="eq -> dr (in ref. 1; baa10908 and 4; m19501)"\']']
970	CONFLICT	1	sa -> rs	2	[u'[\'/note="sa -> rs (in ref. 1; caa63057)"\']']
971	CONFLICT	1	lq -> ft	2	[u'[\'/note="lq -> ft (in ref. 1; aac36870)"\']']
972	CONFLICT	1	dd -> gk	2	[u'[\'/note="dd -> gk (in ref. 5; caa40098)"\']']
973	CONFLICT	2	n -> y	2	[u'[\'/note="n -> y (in ref. 2; aaa21302)"\']', u'[\'/note="n -> y (in ref. 5; aaa68942)"\']']
974	CONFLICT	1	na -> rp	2	[u'[\'/note="na -> rp (in ref. 1; caa48370)"\']']
975	CONFLICT	1	hd -> ti	2	[u'[\'/note="hd -> ti (in ref. 1; aac44131)"\']']
976	CONFLICT	2	y -> h	2	[u'[\'/note="y -> h (in ref. 1; caa38872)"\']', u'[\'/note="y -> h (in ref. 2; aaa24185)"\']']
977	CONFLICT	1	dt -> vs	2	[u'[\'/note="dt -> vs (in ref. 1; aaa24521)"\']']
978	CONFLICT	1	ae -> gt	2	[u'[\'/note="ae -> gt (in ref. 1; aaa24106)"\']']
979	CONFLICT	1	vq -> ik	2	[u'[\'/note="vq -> ik (in ref. 4; x65538)"\']']
980	CONFLICT	1	ln -> vt	2	[u'[\'/note="ln -> vt (in ref. 4; x65538)"\']']
981	CONFLICT	1	eq -> ns	2	[u'[\'/note="eq -> ns (in ref. 4; k02498)"\']']
982	CONFLICT	1	kl -> ss	2	[u'[\'/note="kl -> ss (in ref. 1; aaa23810)"\']']
983	CONFLICT	1	na -> kp	2	[u'[\'/note="na -> kp (in ref. 2; aaa67607)"\']']
984	CONFLICT	1	na -> ks	2	[u'[\'/note="na -> ks (in ref. 1; aaa23701)"\']']
985	CONFLICT	1	ra -> ls	2	[u'[\'/note="ra -> ls (in ref. 6; x56307)"\']']
986	CONFLICT	1	fm -> al	2	[u'[\'/note="fm -> al (in ref. 4)"\']']
987	CONFLICT	1	am -> v	2	[u'[\'/note="am -> v (in ref. 1; aab18507)"\']']
988	CONFLICT	1	qp -> hr	2	[u'[\'/note="qp -> hr (in ref. 1; caa28253)"\']']
989	CONFLICT	1	ag -> r	2	[u'[\'/note="ag -> r (in ref. 1 and 2)"\']']
990	CONFLICT	1	qq -> re	2	[u'[\'/note="qq -> re (in ref. 1; baa03315)"\']']
991	CONFLICT	1	rg -> tr	2	[u'[\'/note="rg -> tr (in ref. 1; aaa23878)"\']']
992	CONFLICT	1	sr -> tg	2	[u'[\'/note="sr -> tg (in ref. 1; aac36870)"\']']
993	CONFLICT	1	st -> nd	2	[u'[\'/note="st -> nd (in ref. 4; x65538)"\']']
994	CONFLICT	1	kt -> ea	2	[u'[\'/note="kt -> ea (in ref. 6; caa27699)"\']']
995	CONFLICT	1	gs -> va	2	[u'[\'/note="gs -> va (in ref. 1; aaa67595)"\']']
996	CONFLICT	1	aa -> gslrrn	2	[u'[\'/note="aa -> gslrrn (in ref. 1; aaa97091)"\']']
997	CONFLICT	1	rv -> lw	2	[u'[\'/note="rv -> lw (in ref. 2; aaa21302)"\']']
998	CONFLICT	1	dd -> mt	2	[u'[\'/note="dd -> mt (in ref. 5; caa27328)"\']']
999	CONFLICT	1	ga -> rr	2	[u'[\'/note="ga -> rr (in ref. 1; caa54369)"\']']
1000	CONFLICT	2	s -> v	2	[u'[\'/note="s -> v (in ref. 7; aa sequence)"\']', u'[\'/note="s -> v (in ref. 6; aa sequence)"\']']
1001	CONFLICT	1	gg -> ea	2	[u'[\'/note="gg -> ea (in ref. 1; aaa97193)"\']']
1002	CONFLICT	1	wr -> ca	2	[u'[\'/note="wr -> ca (in ref. 1; baa03315)"\']']
1003	CONFLICT	2	i -> k	2	[u'[\'/note="i -> k (in ref. 1)"\']', u'[\'/note="i -> k (in ref. 4; x65538)"\']']
1004	CONFLICT	1	i -> d	2	[u'[\'/note="i -> d (in ref. 7; aac43396)"\']']
1005	CONFLICT	1	lr -> pg	2	[u'[\'/note="lr -> pg (in ref. 2; aac36864)"\']']
1006	CONFLICT	1	m -> e	2	[u'[\'/note="m -> e (in ref. 5; caa24910)"\']']
1007	CONFLICT	1	m -> k	2	[u'[\'/note="m -> k (in ref. 4; aat42474)"\']']
1008	CONFLICT	1	vr -> ga	2	[u'[\'/note="vr -> ga (in ref. 1; aaa23773)"\']']
1009	CONFLICT	1	ga -> dt	2	[u'[\'/note="ga -> dt (in ref. 1; aaa79801)"\']']
1010	CONFLICT	1	sg -> rv	2	[u'[\'/note="sg -> rv (in ref. 2)"\']']
1011	CONFLICT	1	sg -> rr	2	[u'[\'/note="sg -> rr (in ref. 1 and 5)"\']']
1012	CONFLICT	1	sd -> tg	2	[u'[\'/note="sd -> tg (in ref. 4; x65538)"\']']
1013	CONFLICT	1	tg -> st	2	[u'[\'/note="tg -> st (in ref. 4; x65538)"\']']
1014	CONFLICT	1	ql -> pv	2	[u'[\'/note="ql -> pv (in ref. 1; caa79892)"\']']
1015	CONFLICT	1	ay -> vh	2	[u'[\'/note="ay -> vh (in ref. 1; aaa23870)"\']']
1016	CONFLICT	2	w -> s	2	[u'[\'/note="w -> s (in ref. 1; aaa66171)"\']', u'[\'/note="w -> s (in ref. 1; caa63921)"\']']
1017	CONFLICT	2	w -> m	2	[u'[\'/note="w -> m (in ref. 1)"\']', u'[\'/note="w -> m (in ref. 3)"\']']
1018	CONFLICT	1	ff -> pl	2	[u'[\'/note="ff -> pl (in ref. 1 and 2)"\']']
1019	CONFLICT	1	h -> v	2	[u'[\'/note="h -> v (in ref. 8; aa sequence)"\']']
1020	CONFLICT	1	h -> e	2	[u'[\'/note="h -> e (in ref. 6; aa sequence)"\']']
1021	CONFLICT	1	e -> i	2	[u'[\'/note="e -> i (in ref. 7; aa sequence)"\']']
1022	CONFLICT	2	e -> p	2	[u'[\'/note="e -> p (in ref. 1; aac36870)"\']', u'[\'/note="e -> p (in ref. 1; aaa23721)"\']']
1023	CONFLICT	1	p -> n	2	[u'[\'/note="p -> n (in ref. 1; aaa24098)"\']']
1024	CONFLICT	1	p -> m	2	[u'[\'/note="p -> m (in ref. 4; aa sequence)"\']']
1025	CONFLICT	1	p -> i	2	[u'[\'/note="p -> i (in ref. 1)"\']']
1026	CONFLICT	1	ri -> ay	2	[u'[\'/note="ri -> ay (in ref. 1; baa02170)"\']']
1027	CONFLICT	1	es -> da	2	[u'[\'/note="es -> da (in ref. 5; m28242)"\']']
1028	CONFLICT	2	r -> k	2	[u'[\'/note="r -> k (in ref. 5; aa sequence)"\']', u'[\'/note="r -> k (in ref. 4; x65538)"\']']
1029	CONFLICT	1	l -> t	2	[u'[\'/note="l -> t (in ref. 5)"\']']
1030	CONFLICT	2	r -> e	2	[u'[\'/note="r -> a (in ref. 1; caa30086)"\', \'/note="r -> e (in ref. 2; no nucleotide entry)"\']', u'[\'/note="r -> e (in ref. 1, 2 and 3)"\']']
1031	CONFLICT	1	da -> ep	2	[u'[\'/note="da -> ep (in ref. 2; aaa23966)"\']']
1032	CONFLICT	1	ge -> ak	2	[u'[\'/note="ge -> ak (in ref. 1; caa48367)"\']']
1033	CONFLICT	1	qc -> ht	2	[u'[\'/note="qc -> ht (in ref. 1; aaa83891)"\']']
1034	CONFLICT	1	pe -> td	2	[u'[\'/note="pe -> td (in ref. 5; aa sequence)"\']']
1035	CONFLICT	1	sq -> fe	2	[u'[\'/note="sq -> fe (in ref. 1 and 2)"\']']
1036	CONFLICT	1	sd -> ne	2	[u'[\'/note="sd -> ne (in ref. 2; aab18572)"\']']
1037	CONFLICT	1	lr -> aa	2	[u'[\'/note="lr -> aa (in ref. 1; aaa16155)"\']']
1038	CONFLICT	1	f -> v	2	[u'[\'/note="f -> v (in ref. 1 and 2)"\']']
1039	CONFLICT	1	mp -> ia	2	[u'[\'/note="mp -> ia (in ref. 6; caa26176)"\']']
1040	CONFLICT	1	aa -> c	2	[u'[\'/note="aa -> c (in ref. 1; caa68435)"\']']
1041	CONFLICT	1	sp -> ta	2	[u'[\'/note="sp -> ta (in ref. 1; aaa24106)"\']']
1042	CONFLICT	2	a -> aa	2	[u'[\'/note="a -> aa (in ref. 2; aaa23966)"\']', u'[\'/note="a -> aa (in ref. 1; aaa62789)"\']']
1043	CONFLICT	1	ea -> vd	2	[u'[\'/note="ea -> vd (in ref. 1; caa50797)"\']']
1044	CONFLICT	1	qg -> hr	2	[u'[\'/note="qg -> hr (in ref. 1; aaa23721)"\']']
1045	CONFLICT	1	vq -> th	2	[u'[\'/note="vq -> th (in ref. 4)"\']']
1046	CONFLICT	1	st -> ya	2	[u'[\'/note="st -> ya (in ref. 3; baa10925)"\']']
1047	CONFLICT	1	pa -> l	2	[u'[\'/note="pa -> l (in ref. 1; caa35211)"\']']
1048	CONFLICT	1	pp -> at	2	[u'[\'/note="pp -> at (in ref. 4; k02672)"\']']
1049	CONFLICT	1	qq -> pl	2	[u'[\'/note="qq -> pl (in ref. 3; y07525)"\']']
1050	CONFLICT	1	ng -> dc	2	[u'[\'/note="ng -> dc (in ref. 5; aa sequence)"\']']
1051	CONFLICT	1	hv -> ql	2	[u'[\'/note="hv -> ql (in ref. 1; aaa69191)"\']']
1052	CONFLICT	1	sl -> dr	2	[u'[\'/note="sl -> dr (in ref. 4; m33577)"\']']
1053	CONFLICT	1	lv -> pg	2	[u'[\'/note="lv -> pg (in ref. 4; k02672)"\']']
1054	CONFLICT	1	ll -> ss	2	[u'[\'/note="ll -> ss (in ref. 1; aaa23870)"\']']
1055	CONFLICT	1	fa -> sp	2	[u'[\'/note="fa -> sp (in ref. 5; aaa85768)"\']']
1056	CONFLICT	1	hi -> ly	2	[u'[\'/note="hi -> ly (in ref. 1; caa50733)"\']']
1057	CONFLICT	1	tl -> rs	2	[u'[\'/note="tl -> rs (in ref. 1; aaa23890/caa30398)"\']']
1058	CONFLICT	1	rg -> a	2	[u'[\'/note="rg -> a (in ref. 1 and 2)"\']']
1059	CONFLICT	1	sv -> ra	2	[u'[\'/note="sv -> ra (in ref. 1; aaa23720)"\']']
1060	CONFLICT	1	r -> v	2	[u'[\'/note="r -> v (in ref. 1; caa34807)"\']']
1061	CONFLICT	1	ca -> wp	2	[u'[\'/note="ca -> wp (in ref. 2; aaa67596)"\']']
1062	CONFLICT	1	aa -> vv	2	[u'[\'/note="aa -> vv (in ref. 1; caa60102)"\']']
1063	CONFLICT	1	ai -> gl	2	[u'[\'/note="ai -> gl (in ref. 1; aaa24004)"\']']
1064	CONFLICT	1	er -> da	2	[u'[\'/note="er -> da (in ref. 1, 2 and 3)"\']']
1065	CONFLICT	1	nm -> kl	2	[u'[\'/note="nm -> kl (in ref. 1; aac36870)"\']']
1066	CONFLICT	1	hd -> lv	2	[u'[\'/note="hd -> lv (in ref. 1; caa50733)"\']']
1067	CONFLICT	1	sg -> ta	2	[u'[\'/note="sg -> ta (in ref. 1; aaa18491)"\']']
1068	CONFLICT	1	gi -> ig	2	[u'[\'/note="gi -> ig (in ref. 8; aa sequence)"\']']
1069	CONFLICT	2	d -> a	2	[u'[\'/note="d -> a (in ref. 5)"\']', u'[\'/note="d -> a (in ref. 1; aac36870)"\']']
1070	CONFLICT	1	la -> sr	2	[u'[\'/note="la -> sr (in ref. 1; aaa68926)"\']']
1071	CONFLICT	1	as -> sa	2	[u'[\'/note="as -> sa (in ref. 5; aa sequence)"\']']
1072	CONFLICT	1	i -> ii	2	[u'[\'/note="i -> ii (in ref. 1; baa04900)"\']']
1073	CONFLICT	1	gl -> wv	2	[u'[\'/note="gl -> wv (in ref. 1; aaa56878)"\']']
1074	CONFLICT	1	st -> ta	2	[u'[\'/note="st -> ta (in ref. 6; aaa16178)"\']']
1075	CONFLICT	1	t -> w	1	[u'[\'/note="t -> w (in ref. 1; aaa79801)"\']']
1076	CONFLICT	1	t -> c	1	[u'[\'/note="t -> c (in ref. 5; aa sequence)"\']']
1077	CONFLICT	1	k -> c	1	[u'[\'/note="k -> w (in ref. 6; aa sequence)"\', \'/note="k -> c (in ref. 6; aa sequence)"\']']
1078	CONFLICT	1	p -> pra	1	[u'[\'/note="p -> pra (in ref. 1; aaa83844)"\']']
1079	CONFLICT	1	f -> g	1	[u'[\'/note="f -> g (in ref. 6; x56307)"\']']
1080	CONFLICT	1	y -> yy	1	[u'[\'/note="y -> yy (in ref. 3; aaa98735)"\']']
1081	CONFLICT	1	a -> m	1	[u'[\'/note="a -> m (in ref. 2; aab02996)"\']']
1082	CONFLICT	1	f -> k	1	[u'[\'/note="f -> k (in ref. 1; aaa03237)"\']']
1083	CONFLICT	1	f -> y	1	[u'[\'/note="f -> y (in ref. 2; aac77851)"\']']
1084	CONFLICT	1	c -> v	1	[u'[\'/note="c -> v (in ref. 1; aaa83866)"\']']
1085	CONFLICT	1	w -> ww	1	[u'[\'/note="w -> ww (in ref. 1; aaa23600 and 2; caa31687)"\']']
1086	CONFLICT	1	c -> f	1	[u'[\'/note="c -> f (in ref. 1; aaa20198)"\']']
1087	CONFLICT	1	c -> g	1	[u'[\'/note="c -> g (in ref. 1; caa48112)"\']']
1088	CONFLICT	1	g -> k	1	[u'[\'/note="g -> k (in ref. 1 and 2)"\']']
1089	CONFLICT	1	n -> q	1	[u'[\'/note="n -> q (in ref. 4)"\']']
1090	CONFLICT	1	n -> h	1	[u'[\'/note="n -> h (in ref. 2; aaa23685)"\']']
1091	CONFLICT	1	n -> a	1	[u'[\'/note="n -> a (in ref. 1, 2 and 3)"\']']
1092	CONFLICT	1	a -> rnalycpllcgisdsndvddylfc	1	[u'[\'/note="a -> rnalycpllcgisdsndvddylfc (in ref. 2)"\']']
1093	CONFLICT	1	y -> k	1	[u'[\'/note="y -> k (in ref. 11; aa sequence)"\']']
1094	CONFLICT	1	v -> vv	1	[u'[\'/note="v -> vv (in ref. 1)"\']']
1095	CONFLICT	1	l -> c	1	[u'[\'/note="l -> c (in ref. 2; aaa67596)"\']']
1096	CONFLICT	1	q -> qq	1	[u'[\'/note="q -> qq (in ref. 1; aab02733)"\']']
1097	CONFLICT	1	v -> s	1	[u'[\'/note="v -> s (in ref. 1; aa sequence)"\']']
1098	CONFLICT	1	v -> k	1	[u'[\'/note="v -> k (in ref. 1; aa sequence)"\']']
1099	CONFLICT	1	n -> nr	1	[u'[\'/note="n -> nr (in ref. 1; caa31900)"\']']
1100	CONFLICT	1	m -> d	1	[u'[\'/note="m -> d (in ref. 4; aa sequence)"\']']
1101	CONFLICT	1	v -> iv	1	[u'[\'/note="v -> iv (in ref. 1; x54687)"\']']
1102	CONFLICT	1	d -> dg	1	[u'[\'/note="d -> dg (in ref. 2; no nucleotide entry)"\']']
1103	CONFLICT	1	l -> n	1	[u'[\'/note="l -> n (in ref. 4; x65538)"\']']
1104	CONFLICT	1	k -> i	1	[u'[\'/note="k -> i (in ref. 2; aac77850)"\']']
1105	CONFLICT	1	w -> a	1	[u'[\'/note="w -> a (in ref. 8; aa sequence)"\']']
1106	CONFLICT	1	e -> een	1	[u'[\'/note="e -> een (in ref. 1)"\']']
1107	CONFLICT	1	h -> p	1	[u'[\'/note="h -> p (in ref. 1; aaa23952)"\']']
1108	CONFLICT	1	h -> k	1	[u'[\'/note="h -> k (in ref. 5; aa sequence and 9; aa sequence)"\']']
1109	CONFLICT	1	f -> fr	1	[u'[\'/note="f -> fr (in ref. 1)"\']']
1110	CONFLICT	1	e -> s	1	[u'[\'/note="e -> s (in ref. 4; k02672)"\']']
1111	CONFLICT	1	p -> y	1	[u'[\'/note="p -> y (in ref. 6; aa sequence)"\']']
1112	CONFLICT	1	p -> d	1	[u'[\'/note="p -> d (in ref. 3; aa sequence)"\']']
1113	CONFLICT	1	s -> w	1	[u'[\'/note="s -> w (in ref. 1; caa35211)"\']']
1114	CONFLICT	1	r -> q	1	[u'[\'/note="r -> q (in ref. 1)"\']']
1115	CONFLICT	1	l -> ll	1	[u'[\'/note="l -> ll (in ref. 1; caa46824)"\']']
1116	CONFLICT	1	p -> pp	1	[u'[\'/note="p -> pp (in ref. 2)"\']']
1117	CONFLICT	1	a -> aq	1	[u'[\'/note="a -> aq (in ref. 2; no nucleotide entry)"\']']
1118	CONFLICT	1	e -> eq	1	[u'[\'/note="e -> eq (in ref. 5; aa sequence and 9; aa sequence)"\']']
1119	CONFLICT	1	v -> n	1	[u'[\'/note="v -> n (in ref. 4; aa sequence)"\']']
1120	CONFLICT	1	l -> lgsl	1	[u'[\'/note="l -> lgsl (in ref. 3)"\']']
1121	CONFLICT	1	q -> qyvvlswagksastrs	1	[u'[\'/note="q -> qyvvlswagksastrs (in ref. 1; l35031)"\']']
1122	CONFLICT	1	g -> rs	1	[u'[\'/note="g -> rs (in ref. 1; caa60102)"\']']
1123	CONFLICT	1	r -> rh	1	[u'[\'/note="r -> rh (in ref. 1; aaa69181)"\']']
1124	CONFLICT	1	a -> rrpfniwrtgcinqfqcfqiiqpqiilfqliffkssqcsltlplsai dkiscirdkhlllkvrisdfiimstdnlfnrrrknrkidhasfslrf	1	[u'[\'/note="a -> rrpfniwrtgcinqfqcfqiiqpqiilfqliffkssqcsltlplsai dkiscirdkhlllkvrisdfiimstdnlfnrrrknrkidhasfslrf (in ref. 1; caa25946)"\']']
1125	CROSSLNK	1	(tyr-met)(trp-tyr)	12	[u"['(tyr-met)(trp-tyr)']"]
1126	DISULFID	21	disulfide-bridge	444	[u"['unknown']", u'[\'/note="(transient)"\']', u'[\'/note="interchain (with substrate)"\']', u'[\'/note="redox-active"\']', u'[\'/note="redox-active" prosite-prorule:pru00691,\']', u'[\'/note="alternate"\']', u"['hamap-rule:mf_01535,']", u'[\'hamap-rule:mf_01535"\']', u'[\'/note="redox-active; alternate"\']', u'[\'/note="redox-active" hamap-rule:mf_00117,\']', u'[\'/note="redox-active" prosite-pr…
1127	DISULFID	2	thioredoxin	12	[u'[\'/note="redox-active" prosite-prorule:pru00691,\']', u'[\'/note="redox-active" prosite-prorule:pru00691"\']']
1128	DISULFID	1	acylphosphatase	2	[u"['hamap-rule:mf_01450,']"]
1129	DNA_BIND	36	h-t-h motif	7856	[u'[\'/note="h-t-h motif" hamap-rule:mf_00959"\']', u'[\'/note="h-t-h motif" prosite-prorule:pru00253"\']', u'[\'/note="h-t-h motif"\']', u'[\'/note="h-t-h motif" hamap-rule:mf_01534"\']', u'[\'/note="h-t-h motif" prosite-prorule:pru00307"\']', u'[\'/note="h-t-h motif" prosite-prorule:pru00254"\']', u'[\'/note="h-t-h motif" prosite-prorule:pru00111"\']', u'[\'/note="h-t-h motif" prosite-prorule:p…
1130	DNA_BIND	1	ompr/phob-type	2285	[u'[\'/note="ompr/phob-type" prosite-prorule:pru01091"\']']
1131	DNA_BIND	1	unknown	118	[u"['unknown']"]
1132	DNA_BIND	1	recombinase	116	[u'[\'/note="recombinase" prosite-prorule:pru01073"\']']
1133	DNA_BIND	1	single-stranded dna-binding protein	7	[u'[\'hamap-rule:mf_00984"\']']
1134	DOMAIN	43	spor	37233	[u'[\'/note="abc transporter" hamap-rule:mf_01707"\']', u'[\'/note="abc transporter" prosite-prorule:pru00434"\']', u'[\'/note="abc transporter" hamap-rule:mf_01726"\']', u'[\'/note="autotransporter" prosite-prorule:pru00556"\']', u'[\'/note="abc transporter" hamap-rule:mf_01705"\']', u'[\'/note="abc transporter 1" prosite-prorule:pru00434"\']', u'[\'/note="abc transporter 2" prosite-prorule:pru0…
1135	DOMAIN	38	abc transporter	35044	[u'[\'/note="abc transporter" hamap-rule:mf_01707"\']', u'[\'/note="abc transporter" prosite-prorule:pru00434"\']', u'[\'/note="abc transporter" hamap-rule:mf_01726"\']', u'[\'/note="abc transporter" hamap-rule:mf_01705"\']', u'[\'/note="abc transporter 1" prosite-prorule:pru00434"\']', u'[\'/note="abc transporter 2" prosite-prorule:pru00434"\', \'/note="abc transporter 1" prosite-prorule:pru0043…
1136	DOMAIN	38	h-t-h	20796	[u'[\'/note="hth lysr-type" prosite-prorule:pru00253"\']', u'[\'/note="hth gntr-type" hamap-rule:mf_00696"\']', u'[\'/note="hth lysr-type"\']', u'[\'/note="hth arac/xyls-type" hamap-rule:mf_01534"\']', u'[\'/note="hth gntr-type" prosite-prorule:pru00307"\']', u'[\'/note="hth merr-type" prosite-prorule:pru00254"\']', u'[\'/note="hth laci-type" prosite-prorule:pru00111"\']', u'[\'/note="hth arsr-ty…
1137	DOMAIN	5	abc transmembrane	16932	[u'[\'/note="abc transmembrane type-1" prosite-prorule:pru00441"\']', u'[\'/note="abc transmembrane type-1" hamap-rule:mf_01703"\']', u'[\'/note="abc transmembrane type-1 1" prosite-prorule:pru00441"\']', u'[\'/note="abc transmembrane type-1 2" prosite-prorule:pru00441"\']', u'[\'/note="abc transmembrane type-2" prosite-prorule:pru00442"\']']
1138	DOMAIN	31	helicase	16751	[u'[\'/note="helicase atp-binding" hamap-rule:mf_00965"\']', u'[\'/note="helicase c-terminal" hamap-rule:mf_00965"\']', u'[\'/note="helicase atp-binding" hamap-rule:mf_00661"\']', u'[\'/note="helicase c-terminal" hamap-rule:mf_00661"\']', u'[\'/note="helicase atp-binding" prosite-prorule:pru00541"\']', u'[\'/note="helicase c-terminal" prosite-prorule:pru00542"\']', u'[\'/note="helicase atp-bindin…
1139	DOMAIN	7	kinase	11604	[u'[\'/note="histidine kinase" prosite-prorule:pru00107"\']', u'[\'/note="histidine kinase"\']', u'[\'/note="guanylate kinase-like"\']', u'[\'/note="histidine kinase" hamap-rule:mf_00979"\']', u'[\'/note="abl" hamap-rule:mf_00979"\']', u'[\'/note="protein kinase" hamap-rule:mf_00414"\']', u'[\'/note="protein kinase" prosite-prorule:pru00159"\']']
1140	DOMAIN	5	pts eiic	10964	[u'[\'/note="pts eiic type-2" prosite-prorule:pru00427"\']', u'[\'/note="pts eiic type-1" prosite-prorule:pru00426"\']', u'[\'/note="pts eiic type-3" prosite-prorule:pru00428"\']', u'[\'/note="pts eiic type-4" prosite-prorule:pru00429"\']', u'[\'/note="pts eiic type-5" prosite-prorule:pru00430"\']']
1141	DOMAIN	1	ferritin-like diiron domain	10440	[u'[\'/note="ferritin-like diiron" prosite-prorule:pru00085"\']']
1142	DOMAIN	1	glutamine synthetase (gs) catalytic domain	8424	[u'[\'/note="gs catalytic" prosite-prorule:pru01331"\']']
1143	DOMAIN	11	act	8343	[u'[\'/note="sigma-54 factor interaction" prosite-prorule:pru00193"\']', u'[\'/note="act" prosite-prorule:pru01007"\']', u'[\'/note="act-like 1" prosite-prorule:pru01008"\']', u'[\'/note="act-like 2" prosite-prorule:pru01008"\']', u'[\'/note="act 1" prosite-prorule:pru01007"\']', u'[\'/note="act 2" prosite-prorule:pru01007"\']', u'[\'/note="act" hamap-rule:mf_01927"\']', u'[\'/note="adomet activa…
1144	DOMAIN	31	ferredoxin	7225	[u'[\'/note="2fe-2s ferredoxin-type" prosite-prorule:pru00465"\']', u'[\'/note="2fe-2s ferredoxin-type" prosite-prorule:pru00465"\', \'/note="4fe-4s his(cys)3-ligated-type" prosite-prorule:pru01184"\']', u'[\'/note="4fe-4s his(cys)3-ligated-type" prosite-prorule:pru01184"\']', u'[\'/note="4fe-4s mo/w bis-mgd-type" prosite-prorule:pru01004"\']', u'[\'/note="4fe-4s ferredoxin-type 1"\']', u'[\'/not…
1145	DOMAIN	1	pfl	6999	[u'[\'/note="pfl" prosite-prorule:pru00887"\']']
1146	DOMAIN	1	pyruvate formate (pfl) lyase	6999	[u'[\'/note="pfl" prosite-prorule:pru00887"\']']
1147	DOMAIN	7	amidotransferase	6872	[u'[\'/note="glutamine amidotransferase type-1" prosite-prorule:pru00605"\']', u'[\'/note="glutamine amidotransferase type-1"\']', u'[\'/note="glutamine amidotransferase type-2" prosite-prorule:pru00609"\']', u'[\'/note="glutamine amidotransferase type-1" hamap-rule:mf_00419"\']', u'[\'/note="glutamine amidotransferase type-2" hamap-rule:mf_01931"\']', u'[\'/note="glutamine amidotransferase type-…
1148	DOMAIN	2	response regulatory	6536	[u'[\'/note="response regulatory" prosite-prorule:pru00169"\']', u'[\'/note="response regulatory" hamap-rule:mf_00099"\']']
1149	DOMAIN	9	atp-grasp	6103	[u'[\'/note="atp-grasp"\']', u'[\'/note="atp-grasp 1" hamap-rule:mf_01210"\']', u'[\'/note="atp-grasp 2" hamap-rule:mf_01210"\']', u'[\'/note="atp-grasp" prosite-prorule:pru00409"\']', u'[\'/note="biotin carboxylation"\', \'/note="atp-grasp" prosite-prorule:pru00409"\']', u'[\'/note="atp-grasp" hamap-rule:mf_01552"\']', u'[\'/note="atp-grasp" hamap-rule:mf_01643"\']', u'[\'/note="atp-grasp" hamap…
1150	DOMAIN	6	n-acetyltransferase	6041	[u'[\'/note="n-acetyltransferase"\']', u'[\'/note="n-acetyltransferase" prosite-prorule:pru00532"\']', u'[\'/note="n-acetyltransferase" hamap-rule:mf_02210"\']', u'[\'/note="n-acetyltransferase" hamap-rule:mf_02018"\']', u'[\'/note="n-acetyltransferase" hamap-rule:mf_01886"\']', u'[\'/note="n-acetyltransferase" hamap-rule:mf_02027"\']']
1151	DOMAIN	19	rna-binding motif	5574	[u'[\'/note="s4 rna-binding" prosite-prorule:pru00182"\']', u'[\'/note="kh" hamap-rule:mf_01595"\']', u'[\'/note="s1 motif" hamap-rule:mf_01595"\']', u'[\'/note="s1 motif" hamap-rule:mf_00970"\']', u'[\'/note="s1 motif" prosite-prorule:pru00180"\']', u'[\'/note="s1-like" hamap-rule:mf_00075"\']', u'[\'/note="s1 motif"\']', u'[\'/note="s4 rna-binding"\']', u'[\'/note="s1 motif" hamap-rule:mf_00945…
1152	DOMAIN	6	sugar isomerase	5442	[u'[\'/note="sis"\']', u'[\'/note="sis" prosite-prorule:pru00797"\']', u'[\'/note="sis 1" prosite-prorule:pru00797"\']', u'[\'/note="sis 2" prosite-prorule:pru00797"\']', u'[\'/note="sis 1"\']', u'[\'/note="sis 2"\']']
1153	DOMAIN	5	radical sam core	5441	[u'[\'/note="radical sam core" prosite-prorule:pru01266"\']', u'[\'/note="4fe-4s ferredoxin-type" prosite-prorule:pru00711"\', \'/note="radical sam core" prosite-prorule:pru01266"\']', u'[\'/note="4fe-4s ferredoxin-type 1" prosite-prorule:pru00711"\', \'/note="radical sam core" prosite-prorule:pru01266"\']', u'[\'/note="4fe-4s ferredoxin-type 1" prosite-prorule:pru00711"\', \'/note="4fe-4s ferred…
1154	DOMAIN	5	radical sam core domain	5441	[u'[\'/note="radical sam core" prosite-prorule:pru01266"\']', u'[\'/note="4fe-4s ferredoxin-type" prosite-prorule:pru00711"\', \'/note="radical sam core" prosite-prorule:pru01266"\']', u'[\'/note="4fe-4s ferredoxin-type 1" prosite-prorule:pru00711"\', \'/note="radical sam core" prosite-prorule:pru01266"\']', u'[\'/note="4fe-4s ferredoxin-type 1" prosite-prorule:pru00711"\', \'/note="4fe-4s ferred…
1155	DOMAIN	2	sigma factor interaction	5262	[u'[\'/note="sigma-54 factor interaction" prosite-prorule:pru00193"\']', u'[\'/note="sigma-54 factor interaction"\']']
1156	DOMAIN	7	fad-binding	4826	[u'[\'/note="fad-binding fr-type" prosite-prorule:pru00716"\']', u'[\'/note="fad-binding fr-type" hamap-rule:mf_02098"\']', u'[\'/note="fad-binding pcmh-type" prosite-prorule:pru00718"\']', u'[\'/note="fad-binding fr-type" hamap-rule:mf_01541"\']', u'[\'/note="fad-binding fr-type"\']', u'[\'/note="fad-binding pcmh-type" hamap-rule:mf_02092"\']', u'[\'/note="fad-binding pcmh-type"\']']
1157	DOMAIN	2	eal (signalling)	4759	[u'[\'/note="eal" prosite-prorule:pru00074"\']', u'[\'/note="eal"\']']
1158	DOMAIN	7	hydrolase	4521	[u'[\'/note="nudix hydrolase" prosite-prorule:pru00794"\']', u'[\'/note="nudix hydrolase" hamap-rule:mf_01592"\']', u'[\'/note="nudix hydrolase"\']', u'[\'/note="cn hydrolase" prosite-prorule:pru00054"\']', u'[\'/note="ab hydrolase-1"\']', u'[\'/note="nudix hydrolase" hamap-rule:mf_00941"\']', u'[\'/note="cn hydrolase" hamap-rule:mf_01148"\']']
1159	DOMAIN	1	integrase	4280	[u'[\'/note="integrase catalytic" prosite-prorule:pru00457"\']']
1160	DOMAIN	6	pts eiia	4240	[u'[\'/note="pts eiia type-2" prosite-prorule:pru00417"\']', u'[\'/note="pts eiia type-4" prosite-prorule:pru00419,\']', u'[\'/note="pts eiia type-1" prosite-prorule:pru00416"\']', u'[\'/note="pts eiia type-3" prosite-prorule:pru00418"\']', u'[\'/note="pts eiia type-5" prosite-prorule:pru00420"\']', u'[\'/note="pts eiia type-4" prosite-prorule:pru00419"\']']
1161	DOMAIN	5	lipoyl-binding	3953	[u'[\'/note="lipoyl-binding" prosite-prorule:pru01066"\']', u'[\'/note="lipoyl-binding" hamap-rule:mf_00272"\']', u'[\'/note="lipoyl-binding 1" prosite-prorule:pru01066"\']', u'[\'/note="lipoyl-binding 2" prosite-prorule:pru01066"\']', u'[\'/note="lipoyl-binding 3" prosite-prorule:pru01066"\']']
1162	DOMAIN	1	gcn5-related n-acetyltransferase (gnat) domain	3779	[u'[\'/note="n-acetyltransferase" prosite-prorule:pru00532"\']']
1163	DOMAIN	8	pts eiib	3627	[u'[\'/note="pts eiib type-2" prosite-prorule:pru00422"\']', u'[\'/note="pts eiib type-1" prosite-prorule:pru00421"\']', u'[\'/note="pts eiib type-3" prosite-prorule:pru00423"\']', u'[\'/note="pts eiib type-2 1"\']', u'[\'/note="pts eiib type-2 2" prosite-prorule:pru00422"\']', u'[\'/note="pts eiib type-4" prosite-prorule:pru00424"\']', u'[\'/note="pts eiib type-5" prosite-prorule:pru00425"\']', …
1164	DOMAIN	1	clp r	3474	[u'[\'/note="clp r" prosite-prorule:pru01251"\']']
1165	DOMAIN	1	clp repeat (r) domain	3474	[u'[\'/note="clp r" prosite-prorule:pru01251"\']']
1166	DOMAIN	3	thioredoxin	3270	[u'[\'/note="thioredoxin" prosite-prorule:pru00691"\']', u'[\'/note="thioredoxin"\']', u'[\'/note="thioredoxin" hamap-rule:mf_00269"\']']
1167	DOMAIN	3	pdz domain (protein-protein interaction)	3229	[u'[\'/note="pdz 1" prosite-prorule:pru00143"\']', u'[\'/note="pdz 2" prosite-prorule:pru00143"\']', u'[\'/note="pdz" prosite-prorule:pru00143"\']']
1168	DOMAIN	1	methyl-accepting transducer	2990	[u'[\'/note="methyl-accepting transducer" prosite-prorule:pru00284"\']']
1169	DOMAIN	6	exonuclease	2778	[u'[\'/note="exonuclease" hamap-rule:mf_00157"\']', u'[\'/note="3\\\'-5\\\' exonuclease" hamap-rule:mf_01899"\']', u'[\'/note="exonuclease"\']', u'[\'/note="exoi c-terminal" prosite-prorule:pru01121"\']', u'[\'/note="5\\\'-3\\\' exonuclease"\']', u'[\'/note="3\\\'-5\\\' exonuclease"\']']
1170	DOMAIN	1	ggdef	2777	[u'[\'/note="ggdef" prosite-prorule:pru00095"\']']
1171	DOMAIN	5	flavodoxin-like	2776	[u'[\'/note="flavodoxin-like" prosite-prorule:pru00088"\']', u'[\'/note="flavodoxin-like"\']', u'[\'/note="flavodoxin-like" hamap-rule:mf_01541"\']', u'[\'/note="flavodoxin-like" hamap-rule:mf_00853"\']', u'[\'/note="flavodoxin-like" hamap-rule:mf_01017"\']']
1172	DOMAIN	2	tr-type g	2499	[u'[\'/note="tr-type g"\']', u'[\'/note="tr-type g" prosite-prorule:pru01059"\']']
1173	DOMAIN	1	chew-like	2488	[u'[\'/note="chew-like" prosite-prorule:pru00052"\']']
1174	DOMAIN	12	rck	2446	[u'[\'/note="rck n-terminal" prosite-prorule:pru00543"\']', u'[\'/note="rck n-terminal 1" prosite-prorule:pru00543"\']', u'[\'/note="rck c-terminal 1" prosite-prorule:pru00544"\']', u'[\'/note="rck n-terminal 2" prosite-prorule:pru00543"\']', u'[\'/note="rck c-terminal 2" prosite-prorule:pru00544"\']', u'[\'/note="rck c-terminal 1" hamap-rule:mf_01015"\']', u'[\'/note="rck c-terminal 2" hamap-rul…
1175	DOMAIN	1	tyr recombinase	2424	[u'[\'/note="tyr recombinase" prosite-prorule:pru01246"\']']
1176	DOMAIN	1	tyrosine recombinase domain	2424	[u'[\'/note="tyr recombinase" prosite-prorule:pru01246"\']']
1177	DOMAIN	4	carboxyltransferase	2375	[u'[\'/note="coa carboxyltransferase c-terminal" prosite-prorule:pru01137"\']', u'[\'/note="coa carboxyltransferase n-terminal" prosite-prorule:pru01136"\']', u'[\'/note="pyruvate carboxyltransferase" hamap-rule:mf_01656"\']', u'[\'/note="pyruvate carboxyltransferase" prosite-prorule:pru01151"\']']
1178	DOMAIN	3	o-acetyl-serine/cysteine export (eama)	2335	[u'[\'/note="eama 1"\']', u'[\'/note="eama 2"\']', u'[\'/note="eama"\']']
1179	DOMAIN	4	cystathionine b-synthase (cbs)	2335	[u'[\'/note="cbs 1" prosite-prorule:pru00703"\']', u'[\'/note="cbs 2" prosite-prorule:pru00703"\']', u'[\'/note="cbs 1" hamap-rule:mf_01964"\']', u'[\'/note="cbs 2" hamap-rule:mf_01964"\']']
1180	DOMAIN	2	conserved histidine (h) and/or aspartate (d) (hd)	2331	[u'[\'/note="hd" prosite-prorule:pru01175"\']', u'[\'/note="hd cas3-type" prosite-prorule:pru00974"\']']
1181	DOMAIN	1	iclr-ed	2224	[u'[\'/note="iclr-ed" prosite-prorule:pru00394"\']']
1182	DOMAIN	1	gst c-terminal	2184	[u'[\'/note="gst c-terminal"\']']
1183	DOMAIN	1	gs beta-grasp	2160	[u'[\'/note="gs beta-grasp" prosite-prorule:pru01330"\']']
1184	DOMAIN	1	glutamine synthetase (gs) beta-grasp domain	2160	[u'[\'/note="gs beta-grasp" prosite-prorule:pru01330"\']']
1185	DOMAIN	2	glycine radical	2000	[u'[\'/note="glycine radical" prosite-prorule:pru00493"\']', u'[\'/note="glycine radical"\']']
1186	DOMAIN	9	pas	1989	[u'[\'/note="pas 1"\']', u'[\'/note="pas 2"\']', u'[\'/note="pas" prosite-prorule:pru00140"\']', u'[\'/note="pas 1" prosite-prorule:pru00140"\']', u'[\'/note="pas 2" prosite-prorule:pru00140"\']', u'[\'/note="pas" hamap-rule:mf_00979"\']', u'[\'/note="hamp" prosite-prorule:pru00102"\', \'/note="pas" prosite-prorule:pru00140"\']', u'[\'/note="pas"\']', u'[\'/note="gmps atp-ppase"\']']
1187	DOMAIN	1	asparaginase / glutaminase domain	1952	[u'[\'/note="asparaginase/glutaminase" prosite-prorule:pru01068"\']']
1188	DOMAIN	1	asparaginase/glutaminase	1952	[u'[\'/note="asparaginase/glutaminase" prosite-prorule:pru01068"\']']
1189	DOMAIN	1	autotransporter	1879	[u'[\'/note="autotransporter" prosite-prorule:pru00556"\']']
1190	DOMAIN	1	peripheral subunit-binding (psbd)	1862	[u'[\'/note="peripheral subunit-binding (psbd)" prosite-prorule:pru01170"\']']
1191	DOMAIN	4	bmc	1834	[u'[\'/note="bmc" prosite-prorule:pru01278"\']', u'[\'/note="bmc circularly permuted 1" prosite-prorule:pru01279"\']', u'[\'/note="bmc circularly permuted 2" prosite-prorule:pru01279"\']', u'[\'/note="bmc circularly permuted" prosite-prorule:pru01279"\']']
1192	DOMAIN	2	hamp	1803	[u'[\'/note="hamp" prosite-prorule:pru00102"\']', u'[\'/note="hamp" prosite-prorule:pru00102"\', \'/note="pas" prosite-prorule:pru00140"\']']
1193	DOMAIN	2	biotin carboxylation	1780	[u'[\'/note="biotin carboxylation"\']', u'[\'/note="biotin carboxylation"\', \'/note="atp-grasp" prosite-prorule:pru00409"\']']
1194	DOMAIN	2	mgs-like	1726	[u'[\'/note="mgs-like" prosite-prorule:pru01202"\']', u'[\'/note="mgs-like" hamap-rule:mf_00549"\']']
1195	DOMAIN	2	hpt	1711	[u'[\'/note="hpt" prosite-prorule:pru00110"\']', u'[\'/note="hpt" hamap-rule:mf_00980"\']']
1196	DOMAIN	7	rhodanese	1633	[u'[\'/note="rhodanese" prosite-prorule:pru00173"\']', u'[\'/note="rhodanese" hamap-rule:mf_00469"\']', u'[\'/note="rhodanese 1" prosite-prorule:pru00173"\']', u'[\'/note="rhodanese 2" prosite-prorule:pru00173"\']', u'[\'/note="rhodanese" hamap-rule:mf_01622, prosite-prorule:pru00173"\']', u'[\'/note="rhodanese 3" prosite-prorule:pru00173"\']', u'[\'/note="rhodanese"\']']
1197	DOMAIN	1	histidine-containing phosphotransfer domain (hpt)	1623	[u'[\'/note="hpt" prosite-prorule:pru00110"\']']
1198	DOMAIN	1	fmn hydroxy acid dehydrogenase	1520	[u'[\'/note="fmn hydroxy acid dehydrogenase" hamap-rule:mf_01559"\']']
1199	DOMAIN	1	l-lactate dehydrogenase	1520	[u'[\'/note="fmn hydroxy acid dehydrogenase" hamap-rule:mf_01559"\']']
1200	DOMAIN	1	gst n-terminal	1474	[u'[\'/note="gst n-terminal"\']']
1201	DOMAIN	1	lon proteolytic	1290	[u'[\'/note="lon proteolytic" prosite-prorule:pru01122"\']']
1202	DOMAIN	3	bacterial microcompartment (bmc) circularly permuted	1239	[u'[\'/note="bmc circularly permuted 1" prosite-prorule:pru01279"\']', u'[\'/note="bmc circularly permuted 2" prosite-prorule:pru01279"\']', u'[\'/note="bmc circularly permuted" prosite-prorule:pru01279"\']']
1203	DOMAIN	3	bmc circularly permuted	1239	[u'[\'/note="bmc circularly permuted 1" prosite-prorule:pru01279"\']', u'[\'/note="bmc circularly permuted 2" prosite-prorule:pru01279"\']', u'[\'/note="bmc circularly permuted" prosite-prorule:pru01279"\']']
1204	DOMAIN	13	bacterial ig-like domain 1 (big-1)	1234	[u'[\'/note="big-1 1" prosite-prorule:pru00445"\']', u'[\'/note="big-1 2" prosite-prorule:pru00445"\']', u'[\'/note="big-1 3" prosite-prorule:pru00445"\']', u'[\'/note="big-1 4" prosite-prorule:pru00445"\']', u'[\'/note="big-1 5" prosite-prorule:pru00445"\']', u'[\'/note="big-1 6" prosite-prorule:pru00445"\']', u'[\'/note="big-1 7" prosite-prorule:pru00445"\']', u'[\'/note="big-1 8" prosite-proru…
1205	DOMAIN	6	j	1208	[u'[\'/note="j" hamap-rule:mf_01153"\']', u'[\'/note="yjef n-terminal"\']', u'[\'/note="yjef c-terminal"\']', u'[\'/note="j"\']', u'[\'/note="jmjc" prosite-prorule:pru00538"\']', u'[\'/note="j" prosite-prorule:pru00286"\']']
1206	DOMAIN	1	lon n-terminal domain	1152	[u'[\'/note="lon n-terminal" prosite-prorule:pru01123"\']']
1207	DOMAIN	1	lon n-terminal	1152	[u'[\'/note="lon n-terminal" prosite-prorule:pru01123"\']']
1208	DOMAIN	1	gaf	1137	[u'[\'/note="gaf"\']']
1209	DOMAIN	7	top rim	1100	[u'[\'/note="toprim" prosite-prorule:pru00995"\']', u'[\'/note="toprim" hamap-rule:mf_00952"\']', u'[\'/note="toprim" hamap-rule:mf_00953"\']', u'[\'/note="toprim" hamap-rule:mf_00017"\']', u'[\'/note="toprim" hamap-rule:mf_01898"\']', u'[\'/note="toprim" hamap-rule:mf_00938"\']', u'[\'/note="toprim" hamap-rule:mf_00974"\']']
1210	DOMAIN	3	ompa-like	1079	[u'[\'/note="ompa-like" hamap-rule:mf_00842"\']', u'[\'/note="ompa-like" prosite-prorule:pru00473"\']', u'[\'/note="ompa-like" hamap-rule:mf_02204"\']']
1211	DOMAIN	1	pts eiid	1074	[u'[\'/note="pts eiid" prosite-prorule:pru00431"\']']
1212	DOMAIN	3	rnase	1069	[u'[\'/note="rnase h type-1" prosite-prorule:pru00408"\']', u'[\'/note="rnase iii"\']', u'[\'/note="rnase h type-2" prosite-prorule:pru01319"\']']
1213	DOMAIN	2	fe/b12 periplasmic-binding	1030	[u'[\'/note="fe/b12 periplasmic-binding" prosite-prorule:pru00344"\']', u'[\'/note="fe/b12 periplasmic-binding" hamap-rule:mf_01000"\']']
1214	DOMAIN	3	peptidyl-proline isomerases (ppiase)	1017	[u'[\'/note="ppiase cyclophilin-type" prosite-prorule:pru00156"\']', u'[\'/note="ppiase fkbp-type"\']', u'[\'/note="ppiase fkbp-type" prosite-prorule:pru00277"\']']
1215	DOMAIN	3	peptidyl-prolyl cis-trans isomerase c (ppic)	992	[u'[\'/note="ppic" prosite-prorule:pru00278"\']', u'[\'/note="ppic 1"\']', u'[\'/note="ppic 2"\']']
1216	DOMAIN	1	clpx zinc binding (zb) domain	990	[u'[\'/note="clpx-type zb" prosite-prorule:pru01250"\']']
1217	DOMAIN	1	clpx-type zb	990	[u'[\'/note="clpx-type zb" prosite-prorule:pru01250"\']']
1218	DOMAIN	1	dna core-binding (cb) domain	988	[u'[\'/note="core-binding (cb)" prosite-prorule:pru01248"\']']
1219	DOMAIN	1	core-binding (cb)	988	[u'[\'/note="core-binding (cb)" prosite-prorule:pru01248"\']']
1220	DOMAIN	6	polypeptide-transport-associated (potra)	933	[u'[\'/note="potra" prosite-prorule:pru01115"\']', u'[\'/note="potra 1" prosite-prorule:pru01115,\']', u'[\'/note="potra 2" prosite-prorule:pru01115,\']', u'[\'/note="potra 3" prosite-prorule:pru01115,\']', u'[\'/note="potra 4" prosite-prorule:pru01115,\']', u'[\'/note="potra 5" prosite-prorule:pru01115,\']']
1221	DOMAIN	3	deaminase	930	[u'[\'/note="cmp/dcmp-type deaminase" prosite-prorule:pru01083"\']', u'[\'/note="cmp/dcmp-type deaminase 1" prosite-prorule:pru01083"\']', u'[\'/note="cmp/dcmp-type deaminase 2" prosite-prorule:pru01083"\']']
1222	DOMAIN	3	peptidase	925	[u'[\'/note="peptidase c51" prosite-prorule:pru00048"\']', u'[\'/note="pfpi endopeptidase" prosite-prorule:pru00608"\']', u'[\'/note="peptidase m60" prosite-prorule:pru01060"\']']
1223	DOMAIN	1	gp-pde	888	[u'[\'/note="gp-pde"\']']
1224	DOMAIN	2	hpr	876	[u'[\'/note="hpr" prosite-prorule:pru00681,\']', u'[\'/note="hpr" prosite-prorule:pru00681"\']']
1225	DOMAIN	1	phosphate binding (mgs-like domain)	844	[u'[\'/note="mgs-like" prosite-prorule:pru01202"\']']
1226	DOMAIN	1	carrier	836	[u'[\'/note="carrier" prosite-prorule:pru00258"\']']
1227	DOMAIN	1	iron siderophore/cobalamin periplasmic-binding domain	788	[u'[\'/note="fe/b12 periplasmic-binding" prosite-prorule:pru00344"\']']
1228	DOMAIN	1	kari n-terminal rossmann	776	[u'[\'/note="kari n-terminal rossmann" prosite-prorule:pru01197,\']']
1229	DOMAIN	1	pterin-binding	768	[u'[\'/note="pterin-binding" prosite-prorule:pru00334"\']']
1230	DOMAIN	1	ycao	756	[u'[\'/note="ycao" prosite-prorule:pru00999"\']']
1231	DOMAIN	3	prd transcirption regulatory domain	745	[u'[\'/note="prd 1" prosite-prorule:pru00704"\']', u'[\'/note="prd 2" prosite-prorule:pru00704"\']', u'[\'/note="prd" prosite-prorule:pru00704"\']']
1232	DOMAIN	3	prd	745	[u'[\'/note="prd 1" prosite-prorule:pru00704"\']', u'[\'/note="prd 2" prosite-prorule:pru00704"\']', u'[\'/note="prd" prosite-prorule:pru00704"\']']
1233	DOMAIN	1	csd	732	[u'[\'/note="csd"\']']
1234	DOMAIN	2	atp-cone	724	[u'[\'/note="atp-cone" prosite-prorule:pru00492"\']', u'[\'/note="atp-cone"\']']
1235	DOMAIN	1	hotdog acot-type	696	[u'[\'/note="hotdog acot-type" prosite-prorule:pru01106"\']']
1236	DOMAIN	1	dhak	692	[u'[\'/note="dhak" prosite-prorule:pru00814"\']']
1237	DOMAIN	3	gpt-binding (enga)	688	[u'[\'/note="engb-type g" hamap-rule:mf_00321"\']', u'[\'/note="enga-type g 1"\']', u'[\'/note="enga-type g 2"\']']
1238	DOMAIN	2	nodb homology	680	[u'[\'/note="nodb homology" prosite-prorule:pru01014"\']', u'[\'/note="nodb homology" hamap-rule:mf_01870"\']']
1239	DOMAIN	1	maoc-like	672	[u'[\'/note="maoc-like"\']']
1240	DOMAIN	1	murnac-laa	650	[u'[\'/note="murnac-laa"\']']
1241	DOMAIN	1	trme-type g	648	[u'[\'/note="trme-type g"\']']
1242	DOMAIN	1	hcy-binding	634	[u'[\'/note="hcy-binding" prosite-prorule:pru00333"\']']
1243	DOMAIN	1	homocysteine-binding domain	634	[u'[\'/note="hcy-binding" prosite-prorule:pru00333"\']']
1244	DOMAIN	2	trna-binding	632	[u'[\'/note="trna-binding"\']', u'[\'/note="trna-binding" prosite-prorule:pru00209"\']']
1245	DOMAIN	1	resolvase/invertase-type recombinase catalytic	624	[u'[\'/note="resolvase/invertase-type recombinase catalytic" prosite-prorule:pru01072"\']']
1246	DOMAIN	1	dephospho-coa kinase (dpck)	591	[u'[\'/note="dpck" hamap-rule:mf_00376"\']']
1247	DOMAIN	3	nucleotide binding (obg)	587	[u'[\'/note="obg" prosite-prorule:pru01231"\']', u'[\'/note="obg-type g" hamap-rule:mf_01454"\']', u'[\'/note="obg-type g"\']']
1248	DOMAIN	1	kari c-terminal knotted 2	560	[u'[\'/note="kari c-terminal knotted 2" prosite-prorule:pru01198,\']']
1249	DOMAIN	6	hit	559	[u'[\'/note="chitin-binding type-3 1"\']', u'[\'/note="chitin-binding type-3 2"\']', u'[\'/note="chitin-binding type-3 3"\']', u'[\'/note="chitin-binding type-3 4"\']', u'[\'/note="chitin-binding type-3 5"\']', u'[\'/note="hit" prosite-prorule:pru00464"\']']
1250	DOMAIN	1	glutaredoxin	557	[u'[\'/note="glutaredoxin" prosite-prorule:pru00686"\']']
1251	DOMAIN	2	dsrna-binding domain	554	[u'[\'/note="drbm"\']', u'[\'/note="s5 drbm"\']']
1252	DOMAIN	1	bpl/lpl catalytic	552	[u'[\'/note="bpl/lpl catalytic" prosite-prorule:pru01067"\']']
1253	DOMAIN	2	yrdc-like	548	[u'[\'/note="yrdc-like" prosite-prorule:pru00518"\']', u'[\'/note="yrdc-like" hamap-rule:mf_01852"\']']
1254	DOMAIN	4	plastocyanin-like (copper binding)	547	[u'[\'/note="plastocyanin-like" hamap-rule:mf_00915"\']', u'[\'/note="plastocyanin-like 1"\']', u'[\'/note="plastocyanin-like 2"\']', u'[\'/note="plastocyanin-like 3"\']']
1255	DOMAIN	1	kari c-terminal knotted 1	544	[u'[\'/note="kari c-terminal knotted 1" prosite-prorule:pru01198,\']']
1256	DOMAIN	4	pac	539	[u'[\'/note="pac" prosite-prorule:pru00141"\']', u'[\'/note="pac 1" prosite-prorule:pru00141"\']', u'[\'/note="pac 2" prosite-prorule:pru00141"\']', u'[\'/note="pac 3" prosite-prorule:pru00141"\']']
1257	DOMAIN	1	prephenate/arogenate dehydrogenase	526	[u'[\'/note="prephenate/arogenate dehydrogenase" prosite-prorule:pru00522"\']']
1258	DOMAIN	10	pld phosphodiesterase	516	[u'[\'/note="pld phosphodiesterase" hamap-rule:mf_00347"\']', u'[\'/note="pld phosphodiesterase 1" hamap-rule:mf_00190"\']', u'[\'/note="pld phosphodiesterase 2" hamap-rule:mf_00190"\']', u'[\'/note="pld phosphodiesterase" prosite-prorule:pru00153"\']', u'[\'/note="pld phosphodiesterase 1" prosite-prorule:pru00153"\']', u'[\'/note="pld phosphodiesterase 2" prosite-prorule:pru00153"\']', u'[\'/not…
1259	DOMAIN	2	ssb	506	[u'[\'/note="ssb" hamap-rule:mf_00720"\']', u'[\'/note="ssb" hamap-rule:mf_00984"\']']
1260	DOMAIN	1	nlpc/p60	501	[u'[\'/note="nlpc/p60" prosite-prorule:pru01284"\']']
1261	DOMAIN	1	voc	498	[u'[\'/note="voc" prosite-prorule:pru01163"\']']
1262	DOMAIN	1	bmv	498	[u'[\'/note="bmv" prosite-prorule:pru01280"\']']
1263	DOMAIN	2	b12-binding	493	[u'[\'/note="b12-binding n-terminal" prosite-prorule:pru00667"\']', u'[\'/note="b12-binding" prosite-prorule:pru00666"\']']
1264	DOMAIN	1	mpn	492	[u'[\'/note="mpn" prosite-prorule:pru01182"\']']
1265	DOMAIN	2	pseudouridine synthase and archaeosine transglycosylase (pua)	476	[u'[\'/note="pua" hamap-rule:mf_00456"\']', u'[\'/note="pua"\']']
1266	DOMAIN	1	formyltetrahydrofolate deformylase	474	[u'[\'/note="act" hamap-rule:mf_01927"\']']
1267	DOMAIN	2	yjef	471	[u'[\'/note="yjef n-terminal"\']', u'[\'/note="yjef c-terminal"\']']
1268	DOMAIN	1	poly(a)-binding protein (pabs)	460	[u'[\'/note="pabs" hamap-rule:mf_00198"\']']
1269	DOMAIN	1	rho rna-binding	456	[u'[\'/note="rho rna-bd" prosite-prorule:pru01203"\']']
1270	DOMAIN	1	molybdenum cofactor sulfurase (mosc)	426	[u'[\'/note="mosc" prosite-prorule:pru00670"\']']
1271	DOMAIN	3	lysm	419	[u'[\'/note="lysm" prosite-prorule:pru01118"\']', u'[\'/note="lysm 1" prosite-prorule:pru01118"\']', u'[\'/note="lysm 2" prosite-prorule:pru01118"\']']
1272	DOMAIN	3	spovt-abrb	416	[u'[\'/note="spovt-abrb 1" prosite-prorule:pru01076"\']', u'[\'/note="spovt-abrb 2" prosite-prorule:pru01076"\']', u'[\'/note="spovt-abrb" prosite-prorule:pru01076"\']']
1273	DOMAIN	1	nucleotide-binding (dhal)	402	[u'[\'/note="dhal" prosite-prorule:pru00813"\']']
1274	DOMAIN	1	dhal	402	[u'[\'/note="dhal" prosite-prorule:pru00813"\']']
1275	DOMAIN	3	molybdate-binding	394	[u'[\'/note="mop" prosite-prorule:pru01213"\']', u'[\'/note="mop 1" prosite-prorule:pru01213"\']', u'[\'/note="mop 2" prosite-prorule:pru01213"\']']
1276	DOMAIN	1	cnnm transmembrane	388	[u'[\'/note="cnnm transmembrane" prosite-prorule:pru01193"\']']
1277	DOMAIN	1	gmps atp-ppase	386	[u'[\'/note="gmps atp-ppase"\']']
1278	DOMAIN	2	isomerase	378	[u'[\'/note="abm"\']', u'[\'/note="abm" hamap-rule:mf_02051"\']']
1279	DOMAIN	1	sam-dependent mtase c5-type	371	[u'[\'/note="sam-dependent mtase c5-type" prosite-prorule:pru01016"\']']
1280	DOMAIN	1	c-5 cytosine-specific dna methylase	371	[u'[\'/note="sam-dependent mtase c5-type" prosite-prorule:pru01016"\']']
1281	DOMAIN	2	umuc	369	[u'[\'/note="umuc" prosite-prorule:pru00216"\']', u'[\'/note="umuc"\']']
1282	DOMAIN	1	chorismate mutase	364	[u'[\'/note="chorismate mutase" prosite-prorule:pru00515"\']']
1283	DOMAIN	1	prephenate dehydratase	362	[u'[\'/note="prephenate dehydratase" prosite-prorule:pru00517"\']']
1284	DOMAIN	1	vwfa	358	[u'[\'/note="vwfa" prosite-prorule:pru00219"\']']
1285	DOMAIN	1	macro domain bind adp-ribose, an nad metabolite or related ligands.	350	[u'[\'/note="macro" hamap-rule:mf_01205, prosite-prorule:pru00490"\']']
1286	DOMAIN	1	macro	350	[u'[\'/note="macro" hamap-rule:mf_01205, prosite-prorule:pru00490"\']']
1287	DOMAIN	3	bacterial osmy and nodulation (bon)	344	[u'[\'/note="bon 1" prosite-prorule:pru00229"\']', u'[\'/note="bon 2" prosite-prorule:pru00229"\']', u'[\'/note="bon" prosite-prorule:pru00229"\']']
1288	DOMAIN	1	bmc circularly permuted 1	339	[u'[\'/note="bmc circularly permuted 1" prosite-prorule:pru01279"\']']
1289	DOMAIN	5	chitin-binding	339	[u'[\'/note="chitin-binding type-3 1"\']', u'[\'/note="chitin-binding type-3 2"\']', u'[\'/note="chitin-binding type-3 3"\']', u'[\'/note="chitin-binding type-3 4"\']', u'[\'/note="chitin-binding type-3 5"\']']
1290	DOMAIN	1	era-type g	338	[u'[\'/note="era-type g" prosite-prorule:pru01050"\']']
1291	DOMAIN	1	dynamin-type guanine nucleotide-binding (g) domain	337	[u'[\'/note="dynamin-type g" prosite-prorule:pru01055"\']']
1292	DOMAIN	1	dynamin-type g	337	[u'[\'/note="dynamin-type g" prosite-prorule:pru01055"\']']
1293	DOMAIN	1	biotinyl-binding	336	[u'[\'/note="biotinyl-binding" prosite-prorule:pru01066"\']']
1294	DOMAIN	1	adomet activation	331	[u'[\'/note="adomet activation" prosite-prorule:pru00346"\']']
1295	DOMAIN	1	pnpla	331	[u'[\'/note="pnpla" prosite-prorule:pru01161"\']']
1296	DOMAIN	1	tgs regulatory	330	[u'[\'/note="tgs" prosite-prorule:pru01228"\']']
1297	DOMAIN	1	tgs	330	[u'[\'/note="tgs" prosite-prorule:pru01228"\']']
1298	DOMAIN	1	thump	322	[u'[\'/note="thump"\']']
1299	DOMAIN	1	prd 2	322	[u'[\'/note="prd 2" prosite-prorule:pru00704"\']']
1300	DOMAIN	1	prd 1	316	[u'[\'/note="prd 1" prosite-prorule:pru00704"\']']
1301	DOMAIN	2	protein-glutamate methylesterase/protein-glutamine glutaminase	311	[u'[\'/note="response regulatory" hamap-rule:mf_00099"\']', u'[\'/note="cheb-type methylesterase" hamap-rule:mf_00099"\']']
1302	DOMAIN	1	bmc circularly permuted 2	306	[u'[\'/note="bmc circularly permuted 2" prosite-prorule:pru01279"\']']
1303	DOMAIN	1	stas	305	[u'[\'/note="stas" prosite-prorule:pru00198"\']']
1304	DOMAIN	1	gh18	292	[u'[\'/note="gh18" prosite-prorule:pru01258"\']']
1305	DOMAIN	1	n-acetylmuramoyl-l-alanine amidase	276	[u'[\'/note="n-acetylmuramoyl-l-alanine amidase"\']']
1306	DOMAIN	1	deacetylase sirtuin-type	274	[u'[\'/note="deacetylase sirtuin-type" hamap-rule:mf_01121"\']']
1307	DOMAIN	1	cher-type methyltransferase	272	[u'[\'/note="cher-type methyltransferase" prosite-prorule:pru00051"\']']
1308	DOMAIN	1	reverse transcriptase	266	[u'[\'/note="reverse transcriptase" prosite-prorule:pru00405"\']']
1309	DOMAIN	1	cobw c-terminal	265	[u'[\'/note="cobw c-terminal"\']']
1310	DOMAIN	1	jmjc	256	[u'[\'/note="jmjc" prosite-prorule:pru00538"\']']
1311	DOMAIN	1	apag	250	[u'[\'/note="apag"\']']
1312	DOMAIN	3	giy-yig	231	[u'[\'/note="giy-yig"\']', u'[\'/note="giy-yig" hamap-rule:mf_01029"\']', u'[\'/note="giy-yig" prosite-prorule:pru00977"\']']
1313	DOMAIN	2	mttase n-terminal	229	[u'[\'/note="mttase n-terminal"\']', u'[\'/note="mttase n-terminal" hamap-rule:mf_01864"\']']
1314	DOMAIN	1	dna topoisomerase 4 subunit b	228	[u'[\'/note="toprim" hamap-rule:mf_00938"\']']
1315	DOMAIN	1	shsp	222	[u'[\'/note="shsp" prosite-prorule:pru00285"\']']
1316	DOMAIN	1	pilz	216	[u'[\'/note="pilz"\']']
1317	DOMAIN	1	chad	216	[u'[\'/note="chad" prosite-prorule:pru01045"\']']
1318	DOMAIN	1	rubredoxin-like	208	[u'[\'/note="rubredoxin-like"\']']
1319	DOMAIN	2	fe2og dioxygenase	201	[u'[\'/note="fe2og dioxygenase" prosite-prorule:pru00805"\']', u'[\'/note="fe2og dioxygenase"\']']
1320	DOMAIN	1	cyth	201	[u'[\'/note="cyth" prosite-prorule:pru01044"\']']
1321	DOMAIN	1	cheb-type methylesterase	193	[u'[\'/note="cheb-type methylesterase" hamap-rule:mf_00099"\']']
1322	DOMAIN	3	heavy-metal-associated domain (hma)	191	[u'[\'/note="hma" prosite-prorule:pru00280"\']', u'[\'/note="hma 1" prosite-prorule:pru00280"\']', u'[\'/note="hma 2" prosite-prorule:pru00280"\']']
1323	DOMAIN	3	tram	189	[u'[\'/note="tram" hamap-rule:mf_01010"\']', u'[\'/note="tram"\']', u'[\'/note="tram" hamap-rule:mf_01864"\']']
1324	DOMAIN	1	fdx-acb	188	[u'[\'/note="fdx-acb"\']']
1325	DOMAIN	2	scp2	187	[u'[\'/note="scp2" hamap-rule:mf_02231"\']', u'[\'/note="scp2" hamap-rule:mf_02215"\']']
1326	DOMAIN	1	bluf	184	[u'[\'/note="bluf" prosite-prorule:pru00030"\']']
1327	DOMAIN	1	g	184	[u'[\'/note="g"\']']
1328	DOMAIN	2	acylphosphatase-like	173	[u'[\'/note="acylphosphatase-like" prosite-prorule:pru00520"\']', u'[\'/note="acylphosphatase-like" hamap-rule:mf_01450"\']']
1329	DOMAIN	1	circularly permuted (cp)-type guanine nucleotide-binding	170	[u'[\'/note="cp-type g" prosite-prorule:pru01058"\']']
1330	DOMAIN	1	cp-type g	170	[u'[\'/note="cp-type g" prosite-prorule:pru01058"\']']
1331	DOMAIN	1	hflx-type g	168	[u'[\'/note="hflx-type g" hamap-rule:mf_00900"\']']
1332	DOMAIN	1	gtpase hflx	168	[u'[\'/note="hflx-type g" hamap-rule:mf_00900"\']']
1333	DOMAIN	1	feob-type g	167	[u'[\'/note="feob-type g" prosite-prorule:pru01048"\']']
1334	DOMAIN	1	dihydrofolate reductase	158	[u'[\'/note="dhfr" prosite-prorule:pru00660"\']']
1335	DOMAIN	2	smr	158	[u'[\'/note="smr" prosite-prorule:pru00321"\']', u'[\'/note="smr" hamap-rule:mf_01042"\']']
1336	DOMAIN	1	dhfr	158	[u'[\'/note="dhfr" prosite-prorule:pru00660"\']']
1337	DOMAIN	1	wgr	155	[u'[\'/note="wgr" prosite-prorule:pru01321"\']']
1338	DOMAIN	1	exoi sh3-like	154	[u'[\'/note="exoi sh3-like" prosite-prorule:pru01120"\']']
1339	DOMAIN	1	b5	152	[u'[\'/note="b5"\']']
1340	DOMAIN	1	hnh	151	[u'[\'/note="hnh"\']']
1341	DOMAIN	1	trud	149	[u'[\'/note="trud"\']']
1342	DOMAIN	1	sprt-like	144	[u'[\'/note="sprt-like"\']']
1343	DOMAIN	1	tsaa-like	142	[u'[\'/note="tsaa-like" prosite-prorule:pru01003"\']']
1344	DOMAIN	1	tsaa-like domain	142	[u'[\'/note="tsaa-like" prosite-prorule:pru01003"\']']
1345	DOMAIN	1	fido	142	[u'[\'/note="fido" prosite-prorule:pru00791"\']']
1346	DOMAIN	4	pld phosphodiesterase 2	140	[u'[\'/note="pld phosphodiesterase 2" hamap-rule:mf_00190"\']', u'[\'/note="pld phosphodiesterase 2" prosite-prorule:pru00153"\']', u'[\'/note="pld phosphodiesterase 2" hamap-rule:mf_01918"\']', u'[\'/note="pld phosphodiesterase 2" hamap-rule:mf_01917"\']']
1347	DOMAIN	4	pld phosphodiesterase 1	138	[u'[\'/note="pld phosphodiesterase 1" hamap-rule:mf_00190"\']', u'[\'/note="pld phosphodiesterase 1" prosite-prorule:pru00153"\']', u'[\'/note="pld phosphodiesterase 1" hamap-rule:mf_01918"\']', u'[\'/note="pld phosphodiesterase 1" hamap-rule:mf_01917"\']']
1348	DOMAIN	1	tyrosine-protein phosphatase	134	[u'[\'/note="tyrosine-protein phosphatase" prosite-prorule:pru00160"\']']
1349	DOMAIN	1	photolyase/cryptochrome alpha/beta	133	[u'[\'/note="photolyase/cryptochrome alpha/beta"\']']
1350	DOMAIN	1	dagkc	132	[u'[\'/note="dagkc"\']']
1351	DOMAIN	1	ribosomal protein s5	128	[u'[\'/note="s5 drbm"\']']
1352	DOMAIN	1	msrb	123	[u'[\'/note="msrb" prosite-prorule:pru01126"\']']
1353	DOMAIN	1	exoi c-terminal	118	[u'[\'/note="exoi c-terminal" prosite-prorule:pru01121"\']']
1354	DOMAIN	1	single-stranded dna-binding protein	106	[u'[\'/note="ssb" hamap-rule:mf_00984"\']']
1355	DOMAIN	1	crm	97	[u'[\'/note="crm" prosite-prorule:pru00626"\']']
1356	DOMAIN	1	asch	96	[u'[\'/note="asch"\']']
1357	DOMAIN	1	toprim domain for dna strand breakage/repaid	91	[u'[\'/note="toprim" prosite-prorule:pru00995"\']']
1358	DOMAIN	1	yebf/cmi	88	[u'[\'/note="yebf/cmi" prosite-prorule:pru01323"\']']
1359	DOMAIN	1	acylphosphatase	88	[u'[\'/note="acylphosphatase-like" hamap-rule:mf_01450"\']']
1360	DOMAIN	1	ycgl	85	[u'[\'/note="ycgl" hamap-rule:mf_01866"\']']
1361	DOMAIN	3	helix-hairpin-helix (hhh)	81	[u'[\'/note="hhh 1"\']', u'[\'/note="hhh 2"\']', u'[\'/note="hhh" hamap-rule:mf_00942"\']']
1362	DOMAIN	1	prc barrel	80	[u'[\'/note="prc barrel"\']']
1363	DOMAIN	1	brct	79	[u'[\'/note="brct"\']']
1364	DOMAIN	1	dnaj domain	68	[u'[\'/note="j" prosite-prorule:pru00286"\']']
1365	DOMAIN	1	sh3b	67	[u'[\'/note="sh3b" prosite-prorule:pru01117"\']']
1366	DOMAIN	1	eutk-ctail	57	[u'[\'/note="eutk-ctail" prosite-prorule:pru01281"\']']
1367	DOMAIN	2	cardiolipin synthase a	56	[u'[\'/note="pld phosphodiesterase 1" hamap-rule:mf_00190"\']', u'[\'/note="pld phosphodiesterase 2" hamap-rule:mf_00190"\']']
1368	DOMAIN	2	cardiolipin synthase b	56	[u'[\'/note="pld phosphodiesterase 1" hamap-rule:mf_01917"\']', u'[\'/note="pld phosphodiesterase 2" hamap-rule:mf_01917"\']']
1369	DOMAIN	2	cardiolipin synthase c	56	[u'[\'/note="pld phosphodiesterase 1" hamap-rule:mf_01918"\']', u'[\'/note="pld phosphodiesterase 2" hamap-rule:mf_01918"\']']
1370	DOMAIN	1	dlh	54	[u'[\'/note="dlh"\']']
1371	DOMAIN	1	kow	32	[u'[\'/note="kow" hamap-rule:mf_00948"\']']
1372	HELIX	1	helix	498846	[u"['helix']"]
1373	INIT_MET	363	init_met	1093	[u'[\'/note="removed" /note="shikimate kinase 2" /id="pro_0000192378"\']', u'[\'/note="removed" /note="fatty acid metabolism regulator protein" /id="pro_0000050626"\']', u'[\'/note="removed" /note="2-methylisocitrate lyase" /id="pro_0000068815"\']', u'[\'/note="removed" /note="pyruvate dehydrogenase e1 component" /id="pro_0000162243"\']', u'[\'/note="removed" /note="nadh-quinone oxidoreductase su…
1374	INTRAMEM	9	intramem	1430	[u"['unknown']", u'[\'/note="helical; name=m3"\']', u'[\'/note="helical; name=m7"\']', u'[\'/note="helical"\']', u'[\'/note="note=loop between two helices"\']', u'[\'/note="helical; pore-forming"\']', u'[\'/note="discontinuously helical"\']', u'[\'/note="helical; name=helix 2a"\']', u'[\'/note="helical; name=helix 2b"\']']
1375	LIPID	17	n-palmitoyl cysteine	207	[u'[\'/note="n-palmitoyl cysteine" prosite-prorule:pru00303,\', \'/note="s-diacylglycerol cysteine" prosite-prorule:pru00303"\']', u'[\'/note="s-diacylglycerol cysteine" prosite-prorule:pru00303"\', \'/note="n-palmitoyl cysteine" prosite-prorule:pru00303"\']', u'[\'/note="n-palmitoyl cysteine"\', \'/note="s-diacylglycerol cysteine" prosite-prorule:pru00303,\']', u'[\'/note="n-palmitoyl cysteine" …
1376	LIPID	17	s-diacylglycerol cysteine	207	[u'[\'/note="n-palmitoyl cysteine" prosite-prorule:pru00303,\', \'/note="s-diacylglycerol cysteine" prosite-prorule:pru00303"\']', u'[\'/note="s-diacylglycerol cysteine" prosite-prorule:pru00303"\', \'/note="n-palmitoyl cysteine" prosite-prorule:pru00303"\']', u'[\'/note="n-palmitoyl cysteine"\', \'/note="s-diacylglycerol cysteine" prosite-prorule:pru00303,\']', u'[\'/note="n-palmitoyl cysteine" …
1377	METAL	121	iron	1959	[u'[\'/note="iron (heme axial ligand)"\']', u'[\'/note="iron-sulfur (4fe-4s-s-adomet)"\']', u'[\'/note="iron-sulfur (2fe-2s)"\']', u'[\'/note="iron-sulfur (4fe-4s) 1; via tele nitrogen" prosite-prorule:pru01184"\']', u'[\'/note="iron-sulfur (4fe-4s) 1" prosite-prorule:pru01184"\']', u'[\'/note="iron-sulfur (4fe-4s) 2"\']', u'[\'/note="iron-sulfur (4fe-4s) 3"\']', u'[\'/note="iron-sulfur (4fe-4s) …
1378	METAL	96	zinc	1667	[u'[\'/note="zinc" hamap-rule:mf_00124"\']', u'[\'/note="zinc"\']', u'[\'/note="zinc; catalytic"\']', u'[\'/note="zinc 1"\']', u'[\'/note="zinc 2"\', \'/note="zinc 1"\']', u'[\'/note="zinc 2"\']', u'[\'/note="zinc; via pros nitrogen"\']', u'[\'/note="zn(2+); catalytic"\', \'/note="fe(2+); catalytic"\']', u'[\'/note="zinc" hamap-rule:mf_01022"\']', u'[\'/note="zinc; via pros nitrogen" hamap-rule:m…
1379	METAL	106	magnesium	1350	[u'[\'/note="magnesium"\']', u'[\'/note="magnesium" hamap-rule:mf_01939,\']', u'[\'/note="magnesium; via carbonyl oxygen"\']', u'[\'/note="magnesium or manganese" hamap-rule:mf_01592"\']', u'[\'/note="magnesium" hamap-rule:mf_00347,\']', u'[\'/note="magnesium" hamap-rule:mf_01022"\']', u'[\'/note="magnesium; via carbonyl oxygen" hamap-rule:mf_01022"\']', u'[\'/note="magnesium" hamap-rule:mf_01033…
1380	METAL	65	iron-sulfur	1115	[u'[\'/note="iron-sulfur (4fe-4s-s-adomet)"\']', u'[\'/note="iron-sulfur (2fe-2s)"\']', u'[\'/note="iron-sulfur (4fe-4s) 1; via tele nitrogen" prosite-prorule:pru01184"\']', u'[\'/note="iron-sulfur (4fe-4s) 1" prosite-prorule:pru01184"\']', u'[\'/note="iron-sulfur (4fe-4s) 2"\']', u'[\'/note="iron-sulfur (4fe-4s) 3"\']', u'[\'/note="iron-sulfur (4fe-4s) 1"\']', u'[\'/note="iron-sulfur (4fe-4s)" h…
1381	METAL	41	manganese	422	[u'[\'/note="manganese"\']', u'[\'/note="magnesium or manganese" hamap-rule:mf_01592"\']', u'[\'/note="manganese 1; via tele nitrogen"\']', u'[\'/note="manganese 1; via pros nitrogen"\']', u'[\'/note="manganese 2"\']', u'[\'/note="manganese 2; via tele nitrogen"\']', u'[\'/note="manganese 1"\', \'/note="manganese 2"\']', u'[\'/note="magnesium or manganese 1"\', \'/note="magnesium or manganese 2"\…
1382	METAL	28	divalent metal cation	405	[u'[\'/note="divalent metal cation"\']', u'[\'/note="divalent metal cation" rule:mf_00901"\']', u'[\'/note="divalent metal cation 1"\']', u'[\'/note="divalent metal cation 2"\', \'/note="divalent metal cation 1"\']', u'[\'/note="divalent metal cation 2"\']', u'[\'/note="divalent metal cation 2; catalytic"\', \'/note="divalent metal cation 1; catalytic"\']', u'[\'/note="divalent metal cation 1; ca…
1383	METAL	5	ferritin-like diiron domain	216	[u'[\'/note="iron 1" prosite-prorule:pru00085,\']', u'[\'/note="iron 3" prosite-prorule:pru00085,\']', u'[\'/note="iron 2" prosite-prorule:pru00085,\', \'/note="iron 1" prosite-prorule:pru00085,\']', u'[\'/note="iron (heme axial ligand); shared with dimeric partner" prosite-prorule:pru00085,\']', u'[\'/note="iron 2" prosite-prorule:pru00085,\']']
1384	METAL	10	potassium	166	[u'[\'/note="potassium; via carbonyl oxygen"\']', u'[\'/note="potassium" hamap-rule:mf_01987,\']', u'[\'/note="potassium; via carbonyl oxygen" hamap-rule:mf_01987,\']', u'[\'/note="potassium"\']', u'[\'/note="potassium 1" hamap-rule:mf_00804"\']', u'[\'/note="potassium 1; via carbonyl oxygen" hamap-rule:mf_00804"\']', u'[\'/note="potassium 2; via carbonyl oxygen" hamap-rule:mf_00804"\']', u'[\'/n…
1385	METAL	17	calcium	138	[u'[\'/note="calcium"\']', u'[\'/note="calcium; via 3-oxoalanine"\']', u'[\'/note="calcium 1"\']', u'[\'/note="calcium 2"\', \'/note="calcium 1"\']', u'[\'/note="calcium 2; via carbonyl oxygen"\']', u'[\'/note="calcium 2"\']', u'[\'/note="calcium 1; via carbonyl oxygen; in dimeric form"\']', u'[\'/note="calcium 2; via carbonyl oxygen; in dimeric form"\']', u'[\'/note="calcium 2; in dimeric form"\…
1386	METAL	8	nickel	74	[u'[\'/note="nickel 1"\']', u'[\'/note="zinc"\', \'/note="nickel 2"\']', u'[\'/note="nickel"\']', u'[\'/note="nickel; via tele nitrogen; shared with dimeric partner"\']', u'[\'/note="nickel; shared with dimeric partner"\']', u'[\'/note="nickel; via tele nitrogen"\']', u'[\'/note="nickel" hamap-rule:mf_00213,\']', u'[\'/note="nickel" hamap-rule:mf_02099,\']']
1387	METAL	1	clpx zinc binding (zb) domain	72	[u'[\'/note="zinc" prosite-prorule:pru01250,\']']
1388	METAL	2	sodium	70	[u'[\'/note="sodium"\']', u'[\'/note="sodium; via carbonyl oxygen"\']']
1389	METAL	11	copper	49	[u'[\'/note="copper(1+)"\']', u'[\'/note="copper" prosite-prorule:pru00280"\']', u'[\'/note="copper"\']', u'[\'/note="copper; catalytic"\']', u'[\'/note="copper; catalytic"\', \'/note="zinc; structural"\']', u'[\'/note="copper; via tele nitrogen"\']', u'[\'/note="copper; via pros nitrogen"\']', u'[\'/note="copper 1; type 2"\']', u'[\'/note="copper 2; type 3"\']', u'[\'/note="copper 3; type 3"\']'…
1390	METAL	5	magnesium or manganese	32	[u'[\'/note="magnesium or manganese" hamap-rule:mf_01592"\']', u'[\'/note="magnesium or manganese 1"\', \'/note="magnesium or manganese 2"\']', u'[\'/note="magnesium or manganese 2"\']', u'[\'/note="magnesium or manganese 1"\']', u'[\'/note="magnesium or manganese"\']']
1391	METAL	3	peptidase b	30	[u'[\'/note="manganese 2" hamap-rule:mf_00504"\']', u'[\'/note="manganese 1" hamap-rule:mf_00504"\', \'/note="manganese 2" hamap-rule:mf_00504"\']', u'[\'/note="manganese 1" hamap-rule:mf_00504"\']']
1392	METAL	5	cobalt	17	[u'[\'/note="magnesium"\', \'/note="cobalt"\']', u'[\'/note="cobalt (methylcob(iii)alamin axial ligand)"\']', u'[\'/note="cobalt (cobalamin axial ligand)"\']', u'[\'/note="cobalt; via tele nitrogen"\']', u'[\'/note="cobalt"\']']
1393	METAL	2	molybdate	17	[u'[\'/note="molybdate"\']', u'[\'/note="molybdate; via amide nitrogen"\']']
1394	METAL	3	ketol-acid reductoisomerase	16	[u'[\'/note="magnesium 2" hamap-rule:mf_00435,\', \'/note="magnesium 1" hamap-rule:mf_00435,\']', u'[\'/note="magnesium 1" hamap-rule:mf_00435"\']', u'[\'/note="magnesium 2" hamap-rule:mf_00435,\']']
1395	METAL	4	molybdenum	16	[u'[\'/note="molybdenum (mo-molybdopterin metal ligand)"\']', u'[\'/note="molybdenum (mo-molybdopterin metal ligand); via carbonyl oxygen"\']', u'[\'/note="molybdenum (mo-molybdopterin metal ligand); via amide nitrogen"\']', u'[\'/note="molybdenum (mo-bis(molybdopterin guanine dinucleotide) metal ligand)"\']']
1396	METAL	2	ribonucleotide reductase small subunit	12	[u'[\'/note="iron 1" prosite-prorule:pru10014"\']', u'[\'/note="iron 1" prosite-prorule:pru10014"\', \'/note="iron 2"\']']
1397	METAL	2	atp-dependent dethiobiotin synthetase	12	[u'[\'/note="magnesium" hamap-rule:mf_00336"\']', u'[\'/note="magnesium 2" hamap-rule:mf_00336,\']']
1398	METAL	5	dihydroorotase	12	[u'[\'/note="zinc 1; via tele nitrogen" hamap-rule:mf_00219,\']', u'[\'/note="zinc 2; via carbamate group" hamap-rule:mf_00219,\', \'/note="zinc 1; via carbamate group" hamap-rule:mf_00219,\']', u'[\'/note="zinc 2; via pros nitrogen" hamap-rule:mf_00219,\']', u'[\'/note="zinc 2; via tele nitrogen" hamap-rule:mf_00219,\']', u'[\'/note="zinc 1" hamap-rule:mf_00219,\']']
1399	METAL	1	selenide, water dikinase	12	[u'[\'/note="magnesium" hamap-rule:mf_00625,\']']
1400	METAL	3	acetylornithine deacetylase	10	[u'[\'/note="zinc 1" hamap-rule:mf_01108"\']', u'[\'/note="zinc 1" hamap-rule:mf_01108"\', \'/note="zinc 2" hamap-rule:mf_01108"\']', u'[\'/note="zinc 2" hamap-rule:mf_01108"\']']
1401	METAL	3	iron-oxo-sulfur	8	[u'[\'/note="iron-oxo-sulfur (4fe-2o-2s); via tele nitrogen" hamap-rule:mf_00069"\']', u'[\'/note="iron-oxo-sulfur (4fe-2o-2s)" hamap-rule:mf_00069"\']', u'[\'/note="iron-oxo-sulfur (4fe-2o-2s); via persulfide group" hamap-rule:mf_00069"\']']
1402	METAL	2	neutral zinc metallopeptidases, zinc-binding region	8	[u'[\'/note="zinc; catalytic"\', \'/note="zinc; catalytic" prosite-prorule:pru10095"\']', u'[\'/note="zinc; catalytic" prosite-prorule:pru10095"\']']
1403	METAL	3	dna topoisomerase 4 subunit b	6	[u'[\'/note="magnesium 1; catalytic" hamap-rule:mf_00938"\']', u'[\'/note="magnesium 1; catalytic" hamap-rule:mf_00938"\', \'/note="magnesium 2" hamap-rule:mf_00938"\']', u'[\'/note="magnesium 2" hamap-rule:mf_00938"\']']
1404	METAL	1	homocysteine-binding domain	3	[u'[\'/note="zinc" prosite-prorule:pru00333"\']']
1405	METAL	1	gtpase hflx	2	[u'[\'/note="magnesium" hamap-rule:mf_00900"\']']
1406	MOD_RES	14	n6-acetyllysine	535	[u'[\'/note="n6-acetyllysine" hamap-rule:mf_00040,\']', u'[\'/note="n6-acetyllysine"\']', u'[\'/note="n6-acetyllysine" hamap-rule:mf_01584,\']', u'[\'/note="n6-acetyllysine" hamap-rule:mf_00184,\']', u'[\'/note="n6-acetyllysine" hamap-rule:mf_00473,\']', u'[\'/note="n6-acetyllysine; alternate"\', \'/note="n6-succinyllysine; alternate"\']', u'[\'/note="n6-acetyllysine; by patz"\']', u'[\'/note="n6…
1407	MOD_RES	5	n6-succinyllysine	333	[u'[\'/note="n6-succinyllysine"\']', u'[\'/note="n6-acetyllysine; alternate"\', \'/note="n6-succinyllysine; alternate"\']', u'[\'/note="n6-acetyllysine; alternate"\', \'/note="n6-malonyllysine; alternate"\', \'/note="n6-succinyllysine; alternate"\']', u'[\'/note="n6-acetyllysine"\', \'/note="n6-succinyllysine"\']', u'[\'/note="n6-malonyllysine; alternate"\', \'/note="n6-succinyllysine; alternate"…
1408	MOD_RES	7	n6-(pyridoxal phosphate)lysine	183	[u'[\'/note="n6-(pyridoxal phosphate)lysine" hamap-rule:mf_00711"\']', u'[\'/note="n6-(pyridoxal phosphate)lysine"\']', u'[\'/note="n6-(pyridoxal phosphate)lysine" rule:mf_02026"\']', u'[\'/note="n6-(pyridoxal phosphate)lysine" hamap-rule:mf_01045"\']', u'[\'/note="n6-(pyridoxal phosphate)lysine" hamap-rule:mf_02087,\']', u'[\'/note="n6-(pyridoxal phosphate)lysine" rule:mf_01107"\']', u'[\'/note=…
1409	MOD_RES	13	phosphohistidine	87	[u'[\'/note="phosphohistidine; by hpr"\']', u'[\'/note="phosphohistidine; by autocatalysis" prosite-prorule:pru00107"\']', u'[\'/note="phosphohistidine" prosite-prorule:pru00110"\']', u'[\'/note="phosphohistidine; by autocatalysis" prosite-prorule:pru00107,\']', u'[\'/note="phosphohistidine; by crr"\']', u'[\'/note="phosphohistidine; by autocatalysis"\']', u'[\'/note="phosphohistidine" hamap-rule…
1410	MOD_RES	3	n6-succinyllysine; alternate	61	[u'[\'/note="n6-acetyllysine; alternate"\', \'/note="n6-succinyllysine; alternate"\']', u'[\'/note="n6-acetyllysine; alternate"\', \'/note="n6-malonyllysine; alternate"\', \'/note="n6-succinyllysine; alternate"\']', u'[\'/note="n6-malonyllysine; alternate"\', \'/note="n6-succinyllysine; alternate"\']']
1411	MOD_RES	6	4-aspartylphosphate	59	[u'[\'/note="4-aspartylphosphate" prosite-prorule:pru00169"\']', u'[\'/note="4-aspartylphosphate" hamap-rule:mf_00981"\']', u'[\'/note="4-aspartylphosphate" prosite-prorule:pru00169,\']', u'[\'/note="4-aspartylphosphate"\']', u'[\'/note="4-aspartylphosphate" rule:mf_00099"\']', u'[\'/note="4-aspartylphosphate" hamap-rule:mf_00958,\']']
1412	MOD_RES	2	n6-lipoyllysine	52	[u'[\'/note="n6-lipoyllysine" prosite-prorule:pru01066,\']', u'[\'/note="n6-lipoyllysine" hamap-rule:mf_00272"\']']
1413	MOD_RES	2	n-formylmethionine	51	[u'[\'/note="n-formylmethionine"\']', u'[\'/note="n-formylmethionine; partial"\']']
1414	MOD_RES	4	phosphohistidine; by autocatalysis	50	[u'[\'/note="phosphohistidine; by autocatalysis" prosite-prorule:pru00107"\']', u'[\'/note="phosphohistidine; by autocatalysis" prosite-prorule:pru00107,\']', u'[\'/note="phosphohistidine; by autocatalysis"\']', u'[\'/note="phosphohistidine; by autocatalysis" hamap-rule:mf_00570"\']']
1415	MOD_RES	2	phosphotyrosine	48	[u'[\'/note="phosphotyrosine; by autocatalysis"\']', u'[\'/note="phosphotyrosine"\']']
1416	MOD_RES	1	glutamate methyl ester (glu)	30	[u'[\'/note="glutamate methyl ester (glu)"\']']
1417	MOD_RES	1	glutamate methyl ester (gln)	27	[u'[\'/note="glutamate methyl ester (gln)"\']']
1418	MOD_RES	3	n6-carboxylysine	24	[u'[\'/note="n6-carboxylysine"\']', u'[\'/note="n6-carboxylysine" hamap-rule:mf_00219,\']', u'[\'/note="n6-carboxylysine" hamap-rule:mf_00012"\']']
1419	MOD_RES	3	phosphohistidine; by hpr	21	[u'[\'/note="phosphohistidine; by hpr"\']', u'[\'/note="phosphohistidine; by hpr" prosite-prorule:pru00418,\']', u'[\'/note="phosphohistidine; by hpr" prosite-prorule:pru00420"\']']
1420	MOD_RES	3	pyruvic acid (ser)	21	[u'[\'/note="pyruvic acid (ser)"\']', u'[\'/note="pyruvic acid (ser); by autocatalysis" hamap-rule:mf_00662,\']', u'[\'/note="pyruvic acid (ser); by autocatalysis"\']']
1421	MOD_RES	7	phosphocysteine	20	[u'[\'/note="phosphocysteine; by eiia"\']', u'[\'/note="phosphocysteine"\']', u'[\'/note="phosphocysteine; by eiia" prosite-prorule:pru00423,\']', u'[\'/note="phosphocysteine; by eiia" prorule:pru00422"\']', u'[\'/note="phosphocysteine; by eiia" prosite-prorule:pru00422"\']', u'[\'/note="phosphocysteine; by eiia" prosite-prorule:pru00422,\']', u'[\'/note="phosphocysteine; by eiia" prosite-prorule…
1422	MOD_RES	2	adp-ribosylarginine	20	[u'[\'/note="(microbial infection) adp-ribosylarginine; by s.proteamaculans tre1"\']', u'[\'/note="adp-ribosylarginine"\']']
1423	MOD_RES	3	phosphoserine	18	[u'[\'/note="phosphoserine"\']', u'[\'/note="phosphoserine; by autocatalysis"\']', u'[\'/note="phosphoserine" hamap-rule:mf_01646"\']']
1424	MOD_RES	6	phosphocysteine; by eiia	17	[u'[\'/note="phosphocysteine; by eiia"\']', u'[\'/note="phosphocysteine; by eiia" prosite-prorule:pru00423,\']', u'[\'/note="phosphocysteine; by eiia" prorule:pru00422"\']', u'[\'/note="phosphocysteine; by eiia" prosite-prorule:pru00422"\']', u'[\'/note="phosphocysteine; by eiia" prosite-prorule:pru00422,\']', u'[\'/note="phosphocysteine; by eiia" prosite-prorule:pru00425"\']']
1425	MOD_RES	1	n6-acetyllysine; by patz	16	[u'[\'/note="n6-acetyllysine; by patz"\']']
1426	MOD_RES	3	glycine radical	16	[u'[\'/note="glycine radical" prosite-prorule:pru00493"\']', u'[\'/note="glycine radical"\']', u'[\'/note="glycine radical" prosite-prorule:pru00493,\']']
1427	MOD_RES	2	o-amp-tyrosine	13	[u'[\'/note="o-amp-tyrosine"\']', u'[\'/note="o-amp-tyrosine; by ydiu"\']']
1428	MOD_RES	1	o-(phosphoribosyl dephospho-coenzyme a)serine	12	[u'[\'/note="o-(phosphoribosyl dephospho-coenzyme a)serine"\']']
1429	MOD_RES	3	o-(pantetheine 4\'-phosphoryl)serine	11	[u'[\'/note="o-(pantetheine 4\\\'-phosphoryl)serine" prosite-prorule:pru00258,\']', u'[\'/note="o-(pantetheine 4\\\'-phosphoryl)serine" prosite-prorule:pru00258"\']', u'[\'/note="o-(pantetheine 4\\\'-phosphoryl)serine"\']']
1430	MOD_RES	3	n6-malonyllysine	10	[u'[\'/note="n6-acetyllysine; alternate"\', \'/note="n6-malonyllysine; alternate"\', \'/note="n6-succinyllysine; alternate"\']', u'[\'/note="n6-malonyllysine"\']', u'[\'/note="n6-malonyllysine; alternate"\', \'/note="n6-succinyllysine; alternate"\']']
1431	MOD_RES	4	cysteine sulfenic acid (-soh)	9	[u'[\'/note="cysteine sulfenic acid (-soh); transient"\']', u'[\'/note="cysteine sulfenic acid (-soh)" hamap-rule:mf_00641,\']', u'[\'/note="cysteine sulfenic acid (-soh)" hamap-rule:mf_00804"\']', u'[\'/note="s-glutathionyl cysteine; alternate"\', \'/note="cysteine sulfenic acid (-soh); alternate"\', \'/note="s-nitrosocysteine; alternate"\']']
1432	MOD_RES	2	n-acetylserine	9	[u'[\'/note="n-acetylserine; in l7"\']', u'[\'/note="n-acetylserine"\']']
1433	MOD_RES	1	phosphotyrosine; by autocatalysis	8	[u'[\'/note="phosphotyrosine; by autocatalysis"\']']
1434	MOD_RES	2	pyruvic acid (ser); by autocatalysis	8	[u'[\'/note="pyruvic acid (ser); by autocatalysis" hamap-rule:mf_00662,\']', u'[\'/note="pyruvic acid (ser); by autocatalysis"\']']
1435	MOD_RES	1	n6-methyllysine; partial	7	[u'[\'/note="n6-methyllysine; partial"\']']
1436	MOD_RES	1	n-acetylserine; in l7	7	[u'[\'/note="n-acetylserine; in l7"\']']
1437	MOD_RES	1	n6-(2-hydroxyisobutyryl)lysine	6	[u'[\'/note="n6-(2-hydroxyisobutyryl)lysine"\']']
1438	MOD_RES	2	phosphohistidine; by ei	6	[u'[\'/note="phosphohistidine; by ei"\']', u'[\'/note="phosphohistidine; by eiia" prosite-prorule:pru00424,\']']
1439	MOD_RES	2	o-ump-tyrosine	6	[u'[\'/note="o-ump-tyrosine" prosite-prorule:pru00675,\']', u'[\'/note="o-ump-tyrosine" prosite-prorule:pru00675"\']']
1440	MOD_RES	1	n-methylphenylalanine	6	[u'[\'/note="n-methylphenylalanine" prosite-prorule:pru01070"\']']
1441	MOD_RES	1	3-hydroxytryptophan; by autocatalysis	6	[u'[\'/note="3-hydroxytryptophan; by autocatalysis"\']']
1442	MOD_RES	1	phosphoserine; by autocatalysis	5	[u'[\'/note="phosphoserine; by autocatalysis"\']']
1443	MOD_RES	1	tele-8alpha-fad histidine	5	[u'[\'/note="tele-8alpha-fad histidine"\']']
1444	MOD_RES	2	phosphothreonine	5	[u'[\'/note="phosphothreonine; by autocatalysis"\']', u'[\'/note="phosphothreonine"\']']
1445	MOD_RES	1	o-amp-threonine; by ydiu	4	[u'[\'/note="o-amp-threonine; by ydiu"\']']
1446	MOD_RES	2	cysteine persulfide	4	[u'[\'/note="cysteine persulfide"\']', u'[\'/note="cysteine persulfide" hamap-rule:mf_00069"\']']
1447	MOD_RES	1	glycyl adenylate; alternate	4	[u'[\'/note="1-thioglycine; alternate"\', \'/note="glycyl adenylate; alternate"\']']
1448	MOD_RES	1	n-methylalanine	4	[u'[\'/note="n-methylalanine"\']']
1449	MOD_RES	3	n-methylmethionine	4	[u'[\'/note="n-methylmethionine; in translation initiation factor if-3; alternate"\']', u'[\'/note="n-methylmethionine"\']', u'[\'/note="n-methylmethionine" prosite-prorule:pru01070"\']']
1450	MOD_RES	1	n5-methylglutamine	4	[u'[\'/note="n5-methylglutamine"\']']
1451	MOD_RES	1	n6-biotinyllysine	4	[u'[\'/note="n6-biotinyllysine" prosite-prorule:pru01066,\']']
1452	MOD_RES	1	n6,n6,n6-trimethyllysine	4	[u'[\'/note="n6,n6,n6-trimethyllysine"\']']
1453	MOD_RES	1	n-acetylalanine	4	[u'[\'/note="n-acetylalanine"\']']
1454	MOD_RES	1	phosphohistidine; by eiia	3	[u'[\'/note="phosphohistidine; by eiia" prosite-prorule:pru00424,\']']
1455	MOD_RES	1	n6-murein peptidoglycan lysine	3	[u'[\'/note="n6-murein peptidoglycan lysine" hamap-rule:mf_00843,\']']
1456	MOD_RES	1	phosphothreonine; by autocatalysis	3	[u'[\'/note="phosphothreonine; by autocatalysis"\']']
1457	MOD_RES	1	s-carbamoylcysteine; by hypf; alternate	2	[u'[\'/note="s-cyanocysteine; by autocatalysis; alternate"\', \'/note="s-carbamoylcysteine; by hypf; alternate"\']']
1458	MOD_RES	1	cysteine sulfinic acid (-so2h); alternate	2	[u'[\'/note="cysteine sulfinic acid (-so2h); alternate"\']']
1459	MOD_RES	1	2\',4\',5\'-topaquinone	2	[u'[\'/note="2\\\',4\\\',5\\\'-topaquinone"\']']
1460	MOD_RES	1	s-cysteinyl cysteine; in inhibited form	2	[u'[\'/note="s-cysteinyl cysteine; in inhibited form"\']']
1461	MOD_RES	1	(3r)-3-hydroxyarginine	2	[u'[\'/note="(3r)-3-hydroxyarginine"\']']
1462	MOD_RES	1	dihydroorotase	2	[u'[\'/note="n6-carboxylysine" hamap-rule:mf_00219,\']']
1463	MOD_RES	1	n,n,n-trimethylalanine	2	[u'[\'/note="n,n,n-trimethylalanine"\']']
1464	MOD_RES	1	(microbial infection) adp-ribosylarginine; by s.proteamaculans tre1	2	[u'[\'/note="(microbial infection) adp-ribosylarginine; by s.proteamaculans tre1"\']']
1465	MOD_RES	2	fmn phosphoryl threonine	2	[u'[\'/note="fmn phosphoryl threonine" hamap-rule:mf_00462"\']', u'[\'/note="fmn phosphoryl threonine" hamap-rule:mf_00479"\']']
1466	MOD_RES	1	n6-methyllysine; alternate	2	[u'[\'/note="n6,n6-dimethyllysine; alternate"\', \'/note="n6-methyllysine; alternate"\']']
1467	MOD_RES	1	3-methylthioaspartic acid	2	[u'[\'/note="3-methylthioaspartic acid"\']']
1468	MOD_RES	1	cysteine sulfenic acid (-soh); transient	2	[u'[\'/note="cysteine sulfenic acid (-soh); transient"\']']
1469	MOD_RES	1	3-oxoalanine (ser)	2	[u'[\'/note="3-oxoalanine (ser)"\']']
1470	MOD_RES	1	o3-poly(beta-hydroxybutyryl)serine	2	[u'[\'/note="o3-poly(beta-hydroxybutyryl)serine"\']']
1471	MOD_RES	1	histidine-containing phosphotransfer domain (hpt)	2	[u'[\'/note="phosphohistidine" prosite-prorule:pru00110"\']']
1472	MOD_RES	1	n-formylmethionine; partial	1	[u'[\'/note="n-formylmethionine; partial"\']']
1473	MOD_RES	1	o-amp-tyrosine; by ydiu	1	[u'[\'/note="o-amp-tyrosine; by ydiu"\']']
1474	MOD_RES	1	n-methylmethionine; in translation initiation factor if-3; alternate	1	[u'[\'/note="n-methylmethionine; in translation initiation factor if-3; alternate"\']']
1475	MOD_RES	1	phosphohistidine; by crr	1	[u'[\'/note="phosphohistidine; by crr"\']']
1476	MOD_RES	1	blocked amino end (met)	1	[u'[\'/note="blocked amino end (met)"\']']
1477	MOD_RES	1	thiazolidine linkage to a ring-opened dna abasic site	1	[u'[\'/note="thiazolidine linkage to a ring-opened dna abasic site"\']']
1478	MOD_RES	1	s-selanylcysteine	1	[u'[\'/note="s-selanylcysteine"\']']
1479	MOD_RES	1	3-oxoalanine (cys)	1	[u'[\'/note="3-oxoalanine (cys)"\']']
1480	MOD_RES	1	s-8alpha-fad cysteine	1	[u'[\'/note="s-8alpha-fad cysteine"\']']
1481	MOD_RES	1	protein-glutamate methylesterase/protein-glutamine glutaminase	1	[u'[\'/note="4-aspartylphosphate" rule:mf_00099"\']']
1482	MOD_RES	1	n-methyltyrosine	1	[u'[\'/note="n-methyltyrosine" prosite-prorule:pru01070"\']']
1483	MOD_RES	1	2-(s-cysteinyl)pyruvic acid o-phosphothioketal	1	[u'[\'/note="2-(s-cysteinyl)pyruvic acid o-phosphothioketal"\']']
1484	MOD_RES	1	s-nitrosocysteine; alternate	1	[u'[\'/note="s-glutathionyl cysteine; alternate"\', \'/note="cysteine sulfenic acid (-soh); alternate"\', \'/note="s-nitrosocysteine; alternate"\']']
1485	MOD_RES	1	n6-(3,6-diaminohexanoyl)-5-hydroxylysine	1	[u'[\'/note="n6-(3,6-diaminohexanoyl)-5-hydroxylysine"\']']
1486	MOD_RES	1	n6-acetyllysine; by autocatalysis	1	[u'[\'/note="n6-acetyllysine; by autocatalysis" hamap-rule:mf_01123,\']']
1487	MOD_RES	1	s-(dipyrrolylmethanemethyl)cysteine	1	[u'[\'/note="s-(dipyrrolylmethanemethyl)cysteine"\']']
1488	MOTIF	2	nudix box	482	[u'[\'/note="nudix box"\']', u'[\'/note="nudix box" prosite-prorule:pru00794"\']']
1489	MOTIF	2	q motif	293	[u'[\'/note="q motif"\']', u'[\'/note="ggq motif"\']']
1490	MOTIF	2	tonb box	195	[u'[\'/note="tonb box"\']', u'[\'/note="tonb c-terminal box"\']']
1491	MOTIF	5	\'high\' region	148	[u'[\'/note="\\\'high\\\' region"\']', u'[\'/note="\\\'high\\\' region" hamap-rule:mf_00126"\']', u'[\'/note="\\\'high\\\' region" hamap-rule:mf_02006"\']', u'[\'/note="\\\'high\\\' region" hamap-rule:mf_00140"\']', u'[\'/note="\\\'high\\\' region" hamap-rule:mf_00022"\']']
1492	MOTIF	5	selectivity filter	99	[u'[\'/note="selectivity filter part_1"\']', u'[\'/note="selectivity filter part_2"\']', u'[\'/note="selectivity filter part_3"\']', u'[\'/note="selectivity filter"\']', u'[\'/note="probable selectivity filter"\']']
1493	MOTIF	5	kmsks	65	[u'[\'/note="\\\'kmsks\\\' region"\']', u'[\'/note="\\\'kmsks\\\' region" hamap-rule:mf_00126"\']', u'[\'/note="\\\'kmsks\\\' region" hamap-rule:mf_02006"\']', u'[\'/note="\\\'kmsks\\\' region" hamap-rule:mf_00140"\']', u'[\'/note="\\\'kmsks\\\' region" hamap-rule:mf_00022"\']']
1494	MOTIF	1	leucine zipper-like	60	[u'[\'/note="leucine zipper-like"\']']
1495	MOTIF	1	jamm motif	56	[u'[\'/note="jamm motif" prosite-prorule:pru01182"\']']
1496	MOTIF	1	polymerase core binding	54	[u'[\'/note="polymerase core binding"\']']
1497	MOTIF	2	npa	48	[u'[\'/note="npa 1"\']', u'[\'/note="npa 2"\']']
1498	MOTIF	1	dead box	40	[u'[\'/note="dead box"\']']
1499	MOTIF	4	hxxxxd motif	36	[u'[\'/note="hxxxxd motif" hamap-rule:mf_01943"\']', u'[\'/note="hxxxxd motif"\']', u'[\'/note="hxxxxd motif" hamap-rule:mf_01942,\']', u'[\'/note="hxxxxd motif" hamap-rule:mf_01944,\']']
1500	MOTIF	1	motif 5, important for activity	33	[u'[\'/note="motif 5, important for activity"\']']
1501	MOTIF	1	part of the ehpqr-motif	32	[u'[\'/note="part of the ehpqr-motif"\']']
1502	MOTIF	3	deah box	32	[u'[\'/note="deah box" prosite-prorule:pru00541"\']', u'[\'/note="deah box"\']', u'[\'/note="deah box" hamap-rule:mf_02205"\']']
1503	MOTIF	1	interaction with polymerase core subunit rpoc	32	[u'[\'/note="interaction with polymerase core subunit rpoc"\']']
1504	MOTIF	1	beta-hairpin	24	[u'[\'/note="beta-hairpin"\']']
1505	MOTIF	1	rpon box	18	[u'[\'/note="rpon box"\']']
1506	MOTIF	1	cys-rich	15	[u'[\'/note="cys-rich segment, might bind a metal cluster"\']']
1507	MOTIF	1	probable selectivity filter	15	[u'[\'/note="probable selectivity filter"\']']
1508	MOTIF	1	gyra-box	14	[u'[\'/note="gyra-box" hamap-rule:mf_01897,\']']
1509	MOTIF	1	histidine triad motif	14	[u'[\'/note="histidine triad motif"\']']
1510	MOTIF	3	cxxc	12	[u'[\'/note="cxxc motif 1"\']', u'[\'/note="cxxc motif 2"\']', u'[\'/note="cxxc"\']']
1511	MOTIF	1	pp-loop motif	12	[u'[\'/note="pp-loop motif"\']']
1512	MOTIF	1	polyp-cytoplasmic motif	10	[u'[\'/note="polyp-cytoplasmic motif"\']']
1513	MOTIF	1	polyp-periplasmic motif	10	[u'[\'/note="polyp-periplasmic motif"\']']
1514	MOTIF	1	gxsxg	10	[u'[\'/note="gxsxg" prosite-prorule:pru01161"\']']
1515	MOTIF	2	hxtx	8	[u'[\'/note="hxtx 1" hamap-rule:mf_01940,\']', u'[\'/note="hxtx 2" hamap-rule:mf_01940,\']']
1516	MOTIF	1	gxgxxg	6	[u'[\'/note="gxgxxg" prosite-prorule:pru01161"\']']
1517	MOTIF	1	important for interaction with partner proteins	6	[u'[\'/note="important for interaction with partner proteins"\']']
1518	MOTIF	1	dga/g	6	[u'[\'/note="dga/g" prosite-prorule:pru01161"\']']
1519	MOTIF	1	involved in the stabilization of the negatively charged intermediate by the formation of the oxyanion hole	6	[u'[\'/note="involved in the stabilization of the negatively charged intermediate by the formation of the oxyanion hole"\']']
1520	MOTIF	1	rada knrfg motif	5	[u'[\'/note="rada knrfg motif" hamap-rule:mf_01498,\']']
1521	MOTIF	1	defh box	4	[u'[\'/note="defh box"\']']
1522	MOTIF	1	dxtw	4	[u'[\'/note="dxtw"\']']
1523	MOTIF	1	meso-diaminopimelate recognition motif	4	[u'[\'/note="meso-diaminopimelate recognition motif"\']']
1524	MOTIF	1	deqh box	4	[u'[\'/note="deqh box"\']']
1525	MOTIF	1	devh box	4	[u'[\'/note="devh box"\']']
1526	MOTIF	1	gly-cispro motif, important for rejection of l-amino acids	4	[u'[\'/note="gly-cispro motif, important for rejection of l-amino acids" hamap-rule:mf_00518,\']']
1527	MOTIF	1	deeh box	4	[u'[\'/note="deeh box"\']']
1528	MOTIF	1	ggq motif	3	[u'[\'/note="ggq motif"\']']
1529	MUTAGEN	202	missing	4096	[u'[\'/note="missing: in lamb1007; significantly less protein in outer membrane, no growth on dextrins, reduced susceptibility to phage lambda."\']', u'[\'/note="missing: no protein should be translated, dna region still acts as an antitoxin to ralr."\']', u'[\'/note="missing: no effect on spacer acquisition, cas1-cas2 complex formation or crispr dna-binding by complex."\']', u'[\'/note="i->g,r: …
1530	MUTAGEN	168	d->a	718	[u'[\'/note="d->a: lack of nuclease activity."\']', u'[\'/note="d->a: 8.3% of wild-type activity."\']', u'[\'/note="d->a: has a 1000-fold lower activity."\']', u'[\'/note="d->a: has 1000-fold lower activity, and has 100-fold lower affinity for manganese."\']', u'[\'/note="d->a: no effect."\']', u'[\'/note="d->k,r,h: loss of enzymatic activity."\', \'/note="d->n: 35000-fold decrease in catalytic e…
1531	MUTAGEN	229	r->a	640	[u'[\'/note="r->a: shows accumulation of partially-assembled 45s particles. binds rrna normally but is severely impaired in atpase and helicase activities. overexpression confers a dominant slow growth and cold-sensitive phenotype."\']', u'[\'/note="r->a: decrease in catalytic activity."\']', u'[\'/note="r->a: dominant negative to wild-type."\']', u'[\'/note="r->a: 4% of wild-type activity."\']',…
1532	MUTAGEN	116	e->a	487	[u'[\'/note="e->a: shows accumulation of partially-assembled 45s particles."\']', u'[\'/note="e->a: great decrease in catalytic activity."\']', u'[\'/note="e->a: no effect on catalytic activity."\']', u'[\'/note="e->a: weakened nadh binding and inhibition."\']', u'[\'/note="e->a: reduced ability to repress."\']', u'[\'/note="e->a: lack of nuclease activity."\']', u'[\'/note="e->a: loss of activit…
1533	MUTAGEN	133	c->a	481	[u'[\'/note="c->a: very poorly expressed."\']', u'[\'/note="c->a: no change in iron-sulfur cluster content. no effect on methylation of cys-355."\']', u'[\'/note="c->a: no change in iron-sulfur cluster content."\']', u'[\'/note="c->a: still fully activated as a holdase by hocl; when associated with a-63."\']', u'[\'/note="c->a: cannot form mixed disulfides with its substrates. still fully activat…
1534	MUTAGEN	141	h->a	477	[u'[\'/note="h->c: can still form a covalent bond with heme, but blocks heme release transfer to cytochrome c."\', \'/note="h->a: abolishes heme binding."\']', u'[\'/note="h->a: no effect on catalytic activity."\']', u'[\'/note="h->a: significant decrease in nuclease activity."\']', u'[\'/note="h->a: no change in nuclease activity."\']', u'[\'/note="h->a: lack of activity."\']', u'[\'/note="h->a:…
1535	MUTAGEN	125	k->a	391	[u'[\'/note="k->a: shows accumulation of partially-assembled 45s particles."\']', u'[\'/note="k->a: no effect on catalytic activity."\']', u'[\'/note="k->a: reduced ability to repress."\']', u'[\'/note="k->a: decreases activity."\']', u'[\'/note="k->a: no change in activity."\']', u'[\'/note="k->a: no cleavage of any substrates."\']', u'[\'/note="k->a: no cleavage of any substrates (pubmed:212194…
1536	MUTAGEN	108	d->n	334	[u'[\'/note="d->n: loss of atpase activity and transport."\']', u'[\'/note="d->n: obviates hydrolysis of ppgpp, moderately decreases biofilm formation, loss of biofilm induction in response to translation inhibitors."\']', u'[\'/note="d->n: obviates synthesis of ppgpp, strongly increases biofilm formation."\']', u'[\'/note="d->n: reduced binding affinity for perrhenate."\']', u'[\'/note="d->n: lo…
1537	MUTAGEN	78	s->a	324	[u'[\'/note="s->a: uncouples chloride transport from proton transport."\']', u'[\'/note="s->a: 80% of wild-type activity."\']', u'[\'/note="s->a: loss of enzyme activity."\']', u'[\'/note="s->a: still autophosphorylates. no change in kinase activity."\']', u'[\'/note="s->c: reduced binding affinity for perrhenate."\', \'/note="s->d: reduced binding affinity for perrhenate. significantly reduced c…
1538	MUTAGEN	77	e->q	306	[u'[\'/note="e->k,d: lower atpase activity and transport efficiency."\', \'/note="e->q: loss of atpase activity and transport."\']', u'[\'/note="e->q: loss of catalytic activity."\', \'/note="e->a: 10000-fold reduction in catalytic activity."\']', u'[\'/note="e->q: 2000-fold reduction in catalytic activity and 4-fold increase in substrate affinity."\']', u'[\'/note="e->q: lack of protease activit…
1539	MUTAGEN	116	c->s	301	[u'[\'/note="c->s: normal transport activity, assembled trimer is less stable."\']', u'[\'/note="c->s: no effect."\']', u'[\'/note="c->s: loss of oligomerization; no alteration of water permeability."\']', u'[\'/note="c->s: weakened nadh binding and inhibition."\']', u'[\'/note="c->s: inactive."\']', u'[\'/note="c->s: 10000-fold decrease in catalytic efficiency."\']', u'[\'/note="c->s: affects ce…
1540	MUTAGEN	1	mnknrgftplavvlmlsgslaltgc->mkktaiaiavalagfatvaqa	300	[u'[\'/note="mnknrgftplavvlmlsgslaltgc->mkktaiaiavalagfatvaqa: fully functional (replaces endogenous signal and lipid anchor with periplasmic signal for ompa)."\']']
1541	MUTAGEN	64	y->f	275	[u'[\'/note="y->f: 3-fold decrease in degp induction when overexpressed."\']', u'[\'/note="y->yy: in lamb203; reduced starch binding, no maltose transport, no growth on dextrins, decreased protein in outer membrane at 37 but not 30 degrees celsius, no change in phage lambda binding."\', \'/note="y->f: increases affinity for starch and maltose, pore size and transport of maltohexaose."\']', u'[\'/…
1542	MUTAGEN	69	g->a	226	[u'[\'/note="g->a: super-repressor, non-inducible phenotype, cells cannot use long chain fatty acids as carbon source."\']', u'[\'/note="g->a: loss of fadr repression."\']', u'[\'/note="g->r: 0.9% of wild-type activity."\', \'/note="g->a: 6.2% of wild-type activity."\']', u'[\'/note="g->a: decreases activity."\']', u'[\'/note="g->a: 80% stimulation of k(+) uptake by trkh."\']', u'[\'/note="g->a: …
1543	MUTAGEN	53	f->a	214	[u'[\'/note="f->a: 1.2% of wild-type activity."\']', u'[\'/note="f->a: loss of enzyme activity."\']', u'[\'/note="f->a: homooligomerizes more efficiently than wt, blocks translocation."\']', u'[\'/note="f->a: reduces rna cleavage by over 98%."\']', u'[\'/note="f->a: strong decrease in activity."\']', u'[\'/note="f->a: 0.5% of wild-type catalytic efficiency."\']', u'[\'/note="f->a: 2% of wild-type…
1544	MUTAGEN	52	y->a	170	[u'[\'/note="y->a: no effect on catalytic activity."\']', u'[\'/note="y->a: loss of fadr repression."\']', u'[\'/note="y->f,w: no effect."\', \'/note="y->l: alters stoichiometry of proton/chloride exchange."\', \'/note="y->a: abolishes gating, permitting continuous rapid transit of chloride ions; when associated with a-148."\']', u'[\'/note="y->a: loss of activity."\']', u'[\'/note="y->a: no effe…
1545	MUTAGEN	61	t->a	167	[u'[\'/note="t->a: 61% of wild-type activity."\']', u'[\'/note="t->a: has 40-fold lower activity."\']', u'[\'/note="t->a: 10% of wild-type activity."\']', u'[\'/note="t->a: decreases activity."\']', u'[\'/note="t->a: no cleavage of any substrates."\']', u'[\'/note="t->a: reduced 5-carboxymethoxyuridine formation."\']', u'[\'/note="t->a: 3-fold decrease in gsh affinity, 21-fold decrease in spermid…
1546	MUTAGEN	22	i->a	149	[u'[\'/note="i->a: no cleavage of rsea in vitro (pubmed:19706448), cleavage of rsea (pubmed:23016873) in vivo."\']', u'[\'/note="i->a: strong decrease in activity."\']', u'[\'/note="i->a: 12-23% of wild-type catalytic efficiency."\']', u'[\'/note="i->f: cannot complement a sura null mutant or reduce the htra-lacz activity induced by periplasmic stresses."\', \'/note="i->a: can complement the grow…
1547	MUTAGEN	31	e->k	149	[u'[\'/note="e->k: loss of activity."\']', u'[\'/note="e->k: in ftsh1; a temperature-sensitive mutant which increases the frequency of lysogenization of phage lambda; when associated with a-587."\']', u'[\'/note="e->k: impairs localization."\']', u'[\'/note="e->k: decreased motility, subnormal torque, tethered strains rotate very slowly, maybe reduced affinity for the motor."\']', u'[\'/note="e->…
1548	MUTAGEN	35	h->n	148	[u'[\'/note="h->n: strongly reduced enzyme activity."\']', u'[\'/note="h->n: loss of activity."\']', u'[\'/note="h->n: nearly abolishes catalytic activity."\']', u'[\'/note="h->n: activity is impaired to 9% of wild-type."\']', u'[\'/note="h->n: 5% and 4% of wild-type reductase and esterase activity, respectively."\']', u'[\'/note="h->q: impaired activity, lower affinity for zinc binding. binds ho…
1549	MUTAGEN	2	isfpypqmdvnfkrvkedkaa->le	147	[u'[\'/note="isfpypqmdvnfkrvkedkaa->hhhhhhle: normal levels of channels are expressed; they recover more slowly than wild- type cells after desensitization."\', \'/note="isfpypqmdvnfkrvkedkaa->le: fewer channels present in the membrane, they require slightly more pressure to open and do not recover after desensitization."\']', u'[\'/note="isfpypqmdvnfkrvkedkaa->hhhhhhle: normal levels of channels…
1550	MUTAGEN	46	g->d	146	[u'[\'/note="g->d: in lamb1002; decreased affinity for maltose, loss of phage lambda binding."\']', u'[\'/note="g->d: dominant negative to wild-type, decreased dna- binding."\']', u'[\'/note="g->d: in dfp-707; temperature-sensitive, impairs folding."\']', u'[\'/note="g->d: 5-fold reduction in catalytic activity."\']', u'[\'/note="emgydwlgrmpykgsvengaykaqgvqltak->cmgydwlgrmpykgsveng aykaqgvqltac: …
1551	MUTAGEN	26	v->a	144	[u'[\'/note="v->a: loss of activity; no effect on trna binding."\']', u'[\'/note="v->a: formation predominantly of c(60), c(65) and c(70) polymers rather than the c(55) polymer."\']', u'[\'/note="v->a: 3.9-fold reduced activity on 5\\\'-po(4) substrate, 1.9-fold reduced activity on 5\\\'-oh substrate. has wild-type 16s rrna in vivo."\']', u'[\'/note="v->a: non-toxic."\']', u'[\'/note="v->a: 80% r…
1552	MUTAGEN	56	n->a	133	[u'[\'/note="n->a: loss of fadr repression."\']', u'[\'/note="n->a: reduces activity 1000-fold."\']', u'[\'/note="n->a: no effect on spacer acquisition."\']', u'[\'/note="n->a: no loss of activity."\']', u'[\'/note="n->a: slight reduction in ability to promote dna repair. great reduction in holliday junction resolution activity."\']', u'[\'/note="n->a: no in vivo protease activity."\']', u'[\'/no…
1553	MUTAGEN	31	p->a	120	[u'[\'/note="pppip->aaais: significantly reduced dependence on ef-p for translation, increased levels of protein in an efp-strain."\', \'/note="p->a: reduced dependence on ef-p for translation, increased levels of protein in an efp- strain."\']', u'[\'/note="p->a: loss of enzyme activity."\']', u'[\'/note="p->d: no fmn binding."\', \'/note="p->a: binds fmn, but more loosely than wild-type."\']', …
1554	MUTAGEN	38	h->q	115	[u'[\'/note="h->a: 48% of wild-type activity."\', \'/note="h->q: 32% of wild-type activity."\']', u'[\'/note="h->q: loss of activity."\']', u'[\'/note="h->q: no effect on enzyme activity."\']', u'[\'/note="h->q: slightly reduced enzyme activity."\']', u'[\'/note="h->q: lack of activity."\']', u'[\'/note="h->k: loss of reductoisomerase activity."\', \'/note="h->q: loss of reductoisomerase activity…
1555	MUTAGEN	23	r->e	114	[u'[\'/note="r->e: dramatically decreased spacer acquisition in vivo."\']', u'[\'/note="r->e: dramatically decreased spacer acquisition in vivo."\', \'/note="r->d: dramatically decreased spacer acquisition in vitro, 250-fold decreased affinity for protospacer dna."\']', u'[\'/note="r->a: decreased spacer acquisition in vivo."\', \'/note="r->e: dramatically decreased spacer acquisition in vivo."\'…
1556	MUTAGEN	31	k->q	114	[u'[\'/note="k->q: absence of aldolase activity. shows a markedly altered substrate specificity relative to the wild-type, with an enhanced activity against pyridine carboxaldehyde, benzaldehyde, and alpha-ketobutyrate; when associated with k-161."\']', u'[\'/note="k->q: no effect."\']', u'[\'/note="k->q: loss of activity."\']', u'[\'/note="k->q: reduced activity."\']', u'[\'/note="k->q: small ef…
1557	MUTAGEN	19	r->k	99	[u'[\'/note="r->k: catalytically active in the nh3-dependent, but inactive for the glutamine-dependent reactions and fails to complex with paba."\']', u'[\'/note="r->k: increases km for n-acetyl-l-glutamate over 1000-fold. increases km for atp nearly 20-fold."\']', u'[\'/note="r->k: abolishes dna cleavage activity."\']', u'[\'/note="r->k: reduces specificity of editing activity for trna(ala), all…
1558	MUTAGEN	43	q->a	96	[u'[\'/note="q->a: loss of fadr repression."\']', u'[\'/note="q->a: loss of enzyme activity."\']', u'[\'/note="q->a: mild defect in dna replication, impaired loading of clamp on dna, polymerase speed is wild-type. more severe replication defect and very poor clamp loading; when associated with a-24."\']', u'[\'/note="q->a: loss of activity."\']', u'[\'/note="q->r: loss of igp synthase activity. w…
1559	MUTAGEN	2	ag->dd	96	[u'[\'/note="missing: in pmwk16; retained in cytosol. loss of function."\', \'/note="ag->dd: abolishes cytotoxic activity."\']', u'[\'/note="ag->dd: abolishes cytotoxic activity."\']']
1560	MUTAGEN	18	m->a	95	[u'[\'/note="m->a: no longer forms cross-link to sdhe, frda is still flavinylated."\']', u'[\'/note="m->a: 13-19% of wild-type catalytic efficiency."\']', u'[\'/note="m->a: 0.5% of wild-type catalytic efficiency."\']', u'[\'/note="m->a: reduces activity by 60%."\']', u'[\'/note="m->a: decreased transfer of cu(+) to cusf, binds 2 cu(+)."\']', u'[\'/note="m->a: 4-fold lower activity than wild-type.…
1561	MUTAGEN	31	k->r	82	[u'[\'/note="k->a: absence of covalent intermediate. addition of ammonia allows the formation of the covalent intermediate and shows that ammonia can replace the function of k-274. reduced catalytic efficiency."\', \'/note="k->r: absence of covalent intermediate."\', \'/note="k->r: reduced catalytic efficiency."\']', u'[\'/note="k->r: reduces activity 50-fold. increases km for n- acetyl-l-glutama…
1562	MUTAGEN	28	r->q	79	[u'[\'/note="r->q: no longer interacts with cpxa."\']', u'[\'/note="r->q: no longer inhibits cpx pathway."\']', u'[\'/note="r->d: strong increase of catalytic efficiency and 2.5-fold increase of the affinity for nadh. 4-fold decrease of the catalytic efficiency and strong decrease of the affinity for nadph. inversion of cofactor specificity from nadph to nadh; when associated with d-68, l-69 and …
1563	MUTAGEN	29	r->c	78	[u'[\'/note="r->c: in lamb1004; reduced starch binding, decreased affinity for maltose, no change in phage lambda binding."\']', u'[\'/note="r->c: dominant negative to wild-type, decreased dna- binding."\']', u'[\'/note="r->c: about 5-fold increased binding affinity for perrhenate as a result of formation of an intramolecular disulfide bond with mutant c-35, which stabilizes the metal-bound close…
1564	MUTAGEN	2	mrrlrfsprssfartlllivtllfaslvttylvvlnfa->mtmitdsl	76	[u'[\'/note="mrrlrfsprssfartlllivtllfaslvttylvvlnfa->mtmitdsl: in envz115; low constitutive expression of ompc or ompf at low and high osmolarity. phosphorylates and dephosphorylates ompr."\']', u'[\'/note="l->f: no ompc, constitutive ompf, with or without sucrose. no change in phosphorylation or dephosphorylation of ompr."\', \'/note="mrrlrfsprssfartlllivtllfaslvttylvvlnfa->mtmitdsl: in envz115;…
1565	MUTAGEN	13	t->v	76	[u'[\'/note="t->v: binds fmn."\']', u'[\'/note="t->v: loss of dimerization."\']', u'[\'/note="t->v: abolishes enzyme activity toward rna substrates with a 5\\\' monophosphate (pubmed:16237448). strongly reduces enzyme activity toward cspa mrna (pubmed:19889093)."\']', u'[\'/note="t->v: strongly reduces activity."\']', u'[\'/note="t->v: 10% and 5% of wild-type reductase and esterase activity, resp…
1566	MUTAGEN	20	g->s	75	[u'[\'/note="g->s: catalytically inactive for both the glutamine- dependent and ammonia-dependent reactions and fails to interact with paba."\']', u'[\'/note="g->s: does not bind fmn. lacks oxidoreductase activity, but is still able to activate potassium efflux."\']', u'[\'/note="g->s: no fmn binding."\']', u'[\'/note="g->s: disrupts folding of the s1 motif."\']', u'[\'/note="g->s: loss of toxici…
1567	MUTAGEN	1	gva->dvd	72	[u'[\'/note="gva->dvd: abolishes cytotoxic activity."\']']
1568	MUTAGEN	10	m->l	70	[u'[\'/note="m->l: no effect."\']', u'[\'/note="m->l: severely reduced activity."\']', u'[\'/note="m->l: 3-fold reduction of synthesis of beta*, probably due to loss of its start codon."\']', u'[\'/note="m->l: no effect on synthesis of beta*."\']', u'[\'/note="m->l: cytochrome b558 shifts to a high spin configuration, complex assembles. retains about 1% quinol oxidoreductase activity after purifi…
1569	MUTAGEN	1	datgidpvsliafdkvvmtadavkqveemla->rrsk	62	[u'[\'/note="datgidpvsliafdkvvmtadavkqveemla->rrsk: loss of s10 operon regulation. assembles into ribosomes in vivo."\']']
1570	MUTAGEN	15	d->g	61	[u'[\'/note="d->g: 5-fold decrease in degp induction when overexpressed."\']', u'[\'/note="d->g: increases affinity for large dextrins."\']', u'[\'/note="d->g: abolishes enzyme activity."\']', u'[\'/note="d->g: in dg 7/1; contains an enzymatically active f1 component, but no functional f0 component."\']', u'[\'/note="d->g: loss of atpase activity; atp is still bound."\']', u'[\'/note="d->g: enzym…
1571	MUTAGEN	16	r->d	58	[u'[\'/note="r->d: dramatically decreased spacer acquisition in vitro, 250-fold decreased affinity for protospacer dna."\', \'/note="r->a: loss of spacer acquisition in vivo, decreased protospacer binding."\']', u'[\'/note="r->e: dramatically decreased spacer acquisition in vivo."\', \'/note="r->d: dramatically decreased spacer acquisition in vitro, 250-fold decreased affinity for protospacer dna…
1572	MUTAGEN	22	d->e	58	[u'[\'/note="d->k,n: 15% to 20% stimulation of k(+) uptake by trkh."\', \'/note="d->e: about 60% stimulation of k(+) uptake by trkh."\']', u'[\'/note="d->e: resistance to the cell-killing function encoded by the gef gene family."\']', u'[\'/note="d->e: reduces activity over 99%. no effect on km for n-acetyl-l-glutamate and atp."\']', u'[\'/note="d->c: loss of activity."\', \'/note="d->e: strong d…
1573	MUTAGEN	17	a->v	56	[u'[\'/note="a->v: dominant negative to wild-type, decreased dna- binding."\']', u'[\'/note="a->v: loss of dimerization."\']', u'[\'/note="a->v: no effect. cleaves rsea without previous degs cleavage; when associated with r-214."\']', u'[\'/note="a->v: in hflk13; stabilizes overproduced secy but not overproduced cii protein."\']', u'[\'/note="a->v: no effect on polymer length."\']', u'[\'/note="a…
1574	MUTAGEN	12	c->a,s	56	[u'[\'/note="c->a,s: loss of activity."\']', u'[\'/note="c->a,s: loss of glutamine-dependent activity but no effect on ammonia-dependent asparagine synthetase activity."\']', u'[\'/note="c->a,s: slightly reduced repressor activity. loss of glyoxylate-triggered dissociation from dna."\']', u'[\'/note="c->a,s: loss of zinc binding. loss of catalytic activity."\']', u'[\'/note="c->a,s: no protease a…
1575	MUTAGEN	14	n->d	55	[u'[\'/note="n->d: causes constitutive active state of the kinase, leading to constitutive expression of a target gene, without addition of c4-dicarboxylates."\']', u'[\'/note="n->d: strongly reduced dna binding."\']', u'[\'/note="n->d: loss of atp binding; loss of autophosphorylation."\']', u'[\'/note="n->d: abolishes association of homodimers into homotetramers. reduces affinity for dnaa. stron…
1576	MUTAGEN	2	fphqasnydpdydyecatqdgakdlck->g	54	[u'[\'/note="missing: lethal."\', \'/note="fphqasnydpdydyecatqdgakdlck->g: delta loop 6; fully resistant to cdia-ec93, does not form aggregates with cdia- ec93 cells."\']', u'[\'/note="hqasnydpd->vdypydvpdya: loop 6 to ha epitope; still susceptible to cdia-ec93."\', \'/note="missing: lethal."\', \'/note="fphqasnydpdydyecatqdgakdlck->g: delta loop 6; fully resistant to cdia-ec93, does not form agg…
1577	MUTAGEN	22	e->d	52	[u'[\'/note="e->k,q: loss of activity."\', \'/note="e->a: 150-fold decrease in catalytic efficiency."\', \'/note="e->d: 4-fold decrease in catalytic efficiency."\']', u'[\'/note="e->a: the reaction is extremely slow."\', \'/note="e->d: the reaction is extremely slow."\']', u'[\'/note="e->s: loss of protease activity."\', \'/note="e->q: does not complement deletion mutant."\', \'/note="e->a: low b…
1578	MUTAGEN	2	eede->aaaa	52	[u'[\'/note="eede->aaaa: 5-fold decrease in crp-class ii promoter-dependent transcription."\']', u'[\'/note="eede->aaaa: 5-fold decrease in crp-class ii promoter-dependent transcription."\', \'/note="e->k: 5-fold decrease in crp-class ii promoter- dependent transcription."\']']
1579	MUTAGEN	30	l->a	51	[u'[\'/note="l->a: 48% of wild-type activity."\']', u'[\'/note="l->a: decreased transcription of csrb."\']', u'[\'/note="l->a: loss of activity."\']', u'[\'/note="l->a: low protease activity in vivo."\']', u'[\'/note="l->a: loss of activity; no effect on trna binding."\']', u'[\'/note="l->a: formation predominantly of a c(70) polymer rather than the c(55) polymer."\']', u'[\'/note="l->a: cannot f…
1580	MUTAGEN	14	a->t	51	[u'[\'/note="a->t: reduction of synthesis of beta*, probably due to mutation of its promoter."\']', u'[\'/note="a->t: temperature-sensitive. loss of lipid export to the outer membrane. significantly decreases atpase activity at 42 degrees celsius but not at 30 degrees celsius."\']', u'[\'/note="a->t: complete loss of motility."\']', u'[\'/note="a->t: loss of mutase activity."\']', u'[\'/note="a->…
1581	MUTAGEN	30	w->a	51	[u'[\'/note="w->a: super-repressor, non-inducible phenotype, cells cannot use long chain fatty acids as carbon source."\']', u'[\'/note="w->a: alone significantly decreased protospacer acquisition in vivo (pubmed:26478180). decreased protospacer binding; in association with a-170 (pubmed:26478180)."\']', u'[\'/note="missing: increased half-life in vivo and in vitro, no change in dna or hipa-bindi…
1582	MUTAGEN	7	k->t	51	[u'[\'/note="k->t: loss of ability to form oligomers even in the presence of atp. loss of chaperone activity."\']', u'[\'/note="k->t: no effect on ability to form oligomers. loss of chaperone activity."\']', u'[\'/note="k->t: slight increase of substrate affinity and decrease of activity."\']', u'[\'/note="k->t: loss of activity."\']', u'[\'/note="gk->kg: 70% of wild-type enzymatic activity."\', …
1583	MUTAGEN	21	l->p	49	[u'[\'/note="l->p: lower atpase activity and transport efficiency."\']', u'[\'/note="l->p: inactivates uptake."\']', u'[\'/note="l->p: cuts rsea without previous degs cleavage."\']', u'[\'/note="l->p: affects activity."\']', u'[\'/note="l->p: does not regulate the s10 operon in vivo."\']', u'[\'/note="l->p: loss of atpase activity; atp is still bound."\']', u'[\'/note="l->p: does not interact wit…
1584	MUTAGEN	2	m->h,l	48	[u'[\'/note="m->h,l: no loss of heme binding."\']', u'[\'/note="m->h,l: loss of heme binding. is still capable of accumulating iron."\']']
1585	MUTAGEN	3	fdptkgseqagh->ggggggggggg	48	[u'[\'/note="fdptkgseqagh->lgppsgsqpakr: changes loop 1 to mazf6 m.tuberculosis sequence; loss of endoribonuclease activity."\', \'/note="fdptkgseqagh->pddsrgpvpsys: changes loop 1 to mazf m.xanthus sequence; loss of endoribonuclease activity."\', \'/note="fdptkgseqagh->ggggggggggg: changes loop 1 to poly-g; loss of endoribonuclease activity."\']', u'[\'/note="fdptkgseqagh->lgppsgsqpakr: changes …
1586	MUTAGEN	1	gk->da	48	[u'[\'/note="gk->da: strongly reduces cytotoxic activity."\']']
1587	MUTAGEN	1	na->dd	48	[u'[\'/note="na->dd: abolishes cytotoxic activity."\']']
1588	MUTAGEN	16	d->a,n	44	[u'[\'/note="d->a,n: loss of catalytic activity."\']', u'[\'/note="d->e: low protease activity in vivo, low atpase activity in vitro, complements ftsh1 at 42 degrees celsius."\', \'/note="d->a,n: no in vivo protease activity, no in vitro atpase activity; probably still binds atp."\']', u'[\'/note="d->a,n: severe loss of catalytic activity."\']', u'[\'/note="d->a,n: abolishes the ability to restor…
1589	MUTAGEN	6	e->s	44	[u'[\'/note="e->s: reduces activity by 85%."\']', u'[\'/note="e->s: loss of activity."\']', u'[\'/note="e->s: reduces activity by 83%."\']', u'[\'/note="e->s: complex stability is significantly decreased; when associated with s-2, same residues as in m.tuberculosis."\']', u'[\'/note="e->s: 100-fold decrease in catalytic activity and 15-fold decrease in affinity for gaba."\']', u'[\'/note="e->q: l…
1590	MUTAGEN	2	i->v	43	[u'[\'/note="i->l: severely reduced activity."\', \'/note="i->v: slightly reduced activity."\']', u'[\'/note="i->v: in dc1; has a functional f0 as well as f1 part. however, the atpase activity is inhibited."\']']
1591	MUTAGEN	7	i->n	42	[u'[\'/note="i->n: cuts rsea without previous degs cleavage."\']', u'[\'/note="i->n: becomes sensitive to phages k3, k4, k5, k3h1, ac3, ox3, tuii*-24, tuii*-26, partially sensitive to phages tuii*-6, tuii*-60, m1."\']', u'[\'/note="i->n: in prla4-2; altered signal sequence interaction."\']', u'[\'/note="i->n: it does not affect the proteolytic activity."\']', u'[\'/note="i->n: stimulates the prot…
1592	MUTAGEN	12	f->l	42	[u'[\'/note="f->l: lower atpase activity and transport efficiency."\']', u'[\'/note="f->l: reduced activity."\']', u'[\'/note="f->l: no effect on phenylalanine transport activity."\']', u'[\'/note="f->l: 65% of wild-type phenylalanine transport activity."\']', u'[\'/note="f->l: 38% of wild-type phenylalanine transport activity."\']', u'[\'/note="f->y: enables the transport of tryptophan to almost…
1593	MUTAGEN	12	e->a,q	41	[u'[\'/note="e->a,q: abolishes proton transport, but permits the transit of chloride ions. abolishes gating, permitting continuous rapid transit of chloride ions; when associated with a-445."\']', u'[\'/note="e->a,q: less than 0.01% of wild-type enzymatic activity."\']', u'[\'/note="e->a,q: wild-type channel activity."\']', u'[\'/note="e->a,q: loss of catalytic activity."\']', u'[\'/note="e->d: 5…
1594	MUTAGEN	14	s->c	41	[u'[\'/note="s->c: highly active."\']', u'[\'/note="s->c: massive ion flux when cross-linked to secy c- 67 mutation."\']', u'[\'/note="s->a: almost no activity."\', \'/note="s->c: 500-fold reduction in activity."\']', u'[\'/note="s->c: no longer binds penicillin."\']', u'[\'/note="s->a,t: unable to bind penicillin."\', \'/note="s->c: still able to bind penicillin."\']', u'[\'/note="s->a: no enter…
1595	MUTAGEN	18	g->v	41	[u'[\'/note="g->v: becomes sensitive to phages k3, k4, k5, k3h1, tuii*-24, tuii*-26, m1, ox2h5, ox2h20, partially sensitive to phages tuii*-46, tuii*-24, tuii*-6, ac3, ox3."\']', u'[\'/note="g->v: increased sensitivity to hu upon overexpression, supports normal growth, no effect in mazef/relbe or tonb deletions."\']', u'[\'/note="g->v: no increase in persister cells upon overexpression, does not …
1596	MUTAGEN	9	t->s	40	[u'[\'/note="t->s: loss of activity."\']', u'[\'/note="t->v: no protease activity."\', \'/note="t->s: 80% reduced protease activity in the absence of hslu. almost no effect in the presence of hslu."\']', u'[\'/note="t->v: reduced kcat by 99.9%."\', \'/note="t->s: 8% of wild-type activity. 4-fold decrease in affinity for pyruvate, but nearly no change in that for (s)-asa."\']', u'[\'/note="t->a,d,…
1597	MUTAGEN	4	vsaevvekeyqvqldiamqsgkpkeiaekmvegrmkkftg->epggea	40	[u'[\'/note="vsaevvekeyqvqldiamqsgkpkeiaekmvegrmkkftg->epggea: resistant to toxins cdia-ct-ec869, cdia-ct-nc101 and cdia- ct-96.154, but not other cdia toxins in growth competition experiments, in vitro prevents cdia-ct-ec869 from digesting trna(gug-gln). resistant to bacteriophage r17."\']', u'[\'/note="vsaevvekeyqvqldiamqsgkpkeiaekmvegrmkkftg->epggea: resistant to toxins cdia-ct-ec869, cdia-ct-…
1598	MUTAGEN	11	k->m	40	[u'[\'/note="k->m: increased cross-linking to sdhe, frda is slightly less flavinylated."\']', u'[\'/note="k->m: inhibits enzyme."\']', u'[\'/note="k->m: reduces activity by 75%."\']', u'[\'/note="k->m: nearly abolishes enzyme activity and strongly reduces substrate affinity."\']', u'[\'/note="k->m: loss of autophosphorylation."\']', u'[\'/note="k->m: strong decrease of the affinity for l-ribulose…
1599	MUTAGEN	9	k->n	39	[u'[\'/note="k->n: still binds plp."\']', u'[\'/note="k->n: loss of activity and plp binding."\']', u'[\'/note="k->n: loss of plp binding."\']', u'[\'/note="k->n: inactive."\']', u'[\'/note="k->n: important decrease in gtpase activity."\']', u'[\'/note="k->n: loss of zinc-stimulated atpase activity. poorly phosphorylated with atp."\']', u'[\'/note="k->l: double r-loop formation. 2-4 fold decrease…
1600	MUTAGEN	8	y->c	39	[u'[\'/note="y->c: strong decrease in activity."\']', u'[\'/note="y->c: in ee51."\']', u'[\'/note="y->f,w: no effect on resistance to toxicants."\', \'/note="y->c: still binds substrate. no transport activity in the presence of a proton gradient, but still transports substrate in the absence of a proton gradient. resistance to toxicants is abolished."\']', u'[\'/note="y->c: no effect on resistanc…
1601	MUTAGEN	10	s->f	38	[u'[\'/note="s->f: complete loss of motility."\']', u'[\'/note="s->f: inactive protein."\']', u'[\'/note="s->f: loss of activity."\']', u'[\'/note="s->f: in mukb106; no effect."\']', u'[\'/note="s->f: loss of activity."\', \'/note="s->c: loss of activity."\', \'/note="s->a: loss of activity."\']', u'[\'/note="s->f: defective binding to arg box."\']', u'[\'/note="s->f: abolishes stimulation of dna…
1602	MUTAGEN	5	l->f	37	[u'[\'/note="l->f: lower atpase activity and transport efficiency."\']', u'[\'/note="l->f: in unce408 and unce463; unable to assemble in the membrane."\']', u'[\'/note="l->t: increases auto-oxidation."\', \'/note="l->f: alters o(2) binding, increases auto- oxidation."\']', u'[\'/note="l->f: no growth at 30 degrees celsius, impaired rida."\']', u'[\'/note="l->f: increased frequency of precise exci…
1603	MUTAGEN	4	a->s	37	[u'[\'/note="a->s: 7- and 2.5-fold increase of the reductoisomerase activity with nadh and nadph, respectively."\']', u'[\'/note="a->s: in secy40; cold-sensitive."\']', u'[\'/note="a->s: no change in transport activity."\']', u'[\'/note="a->s: complex stability is significantly decreased; when associated with s-76, same residues as in m.tuberculosis."\']']
1604	MUTAGEN	18	r->l	37	[u'[\'/note="r->h: 250-fold decrease in kinase activity but no change in substrates affinity."\', \'/note="r->l: 26200-fold decrease in catalytic efficiency."\']', u'[\'/note="r->l: no loss of activity."\']', u'[\'/note="r->l: loss of activity."\']', u'[\'/note="r->l: complete loss of activity."\']', u'[\'/note="r->l: increased transcription of the region ii transcript."\']', u'[\'/note="r->l: lo…
1605	MUTAGEN	1	tqskgypfe->snlhrasepgn	36	[u'[\'/note="tqskgypfe->gggggggg,ggggggggggg: changes loop 2 to poly-g; reduces endoribonuclease activity, alters cleavage sites."\', \'/note="tqskgypfe->sntalaampgn: changes loop 2 to mazf6 m.tuberculosis sequence; reduces endoribonuclease activity, alters cleavage sites."\', \'/note="tqskgypfe->snlhrasepgn: changes loop 2 to mazf m.xanthus sequence; reduces endoribonuclease activity, alters cle…
1606	MUTAGEN	2	c->v	36	[u'[\'/note="c->v: no effect on atp hydrolysis. can support hslv- mediated proteolysis at wild-type levels."\']', u'[\'/note="c->v: no atp hydrolysis activity. binds atp with lower affinity than wild-type. can support hslv-mediated proteolysis to some extent."\']']
1607	MUTAGEN	2	eqadvsiteahvtgtasaeqlietikqagydasvsh->srrmclslkrtlpg lpvqnsrskpsnkrvmthlyan	36	[u'[\'/note="missing: partial resistance to cuso(4), forms phosphate intermediate."\', \'/note="missing: slight increase in cuso(4)-stimulation of atpase, no growth in cuso(4). grows when this protein fragment is provided in trans or if b.subtilis copz is present."\', \'/note="missing: loss of growth in the presence of cuso(4), loss of cu efflux."\', \'/note="missing: no resistance to cuso(4), do…
1608	MUTAGEN	5	a->c	36	[u'[\'/note="a->c: about 5-fold increased binding affinity for perrhenate as a result of formation of an intramolecular disulfide bond with mutant c-177, which stabilizes the metal-bound closed conformation, but no increased binding affinity for molybdate; when associated with c-177."\']', u'[\'/note="a->c: forms inter-ring disulfide bonds. prevents ring separation and leads to the formation of h…
1609	MUTAGEN	2	plag->llts	36	[u'[\'/note="plag->llts: 11-fold decrease in affinity for gtp and nearly no effect on catalytic activity. displays a 3-fold decrease in activity with gtp and gains a low activity with ctp as substrate; when associated with 12-taa-14."\']', u'[\'/note="g->l: slight reduction in catalytic activity."\', \'/note="plag->llts: 11-fold decrease in affinity for gtp and nearly no effect on catalytic activ…
1610	MUTAGEN	13	y->l	35	[u'[\'/note="y->l: does not affect rpos half-life."\']', u'[\'/note="y->f: almost wild-type activity."\', \'/note="y->l: reduced activity."\']', u'[\'/note="y->l: no effect on ability to promote dna repair."\']', u'[\'/note="y->l: 41% of wild-type phenylalanine transport activity."\']', u'[\'/note="y->l: 69% of wild-type phenylalanine transport activity."\']', u'[\'/note="y->l: no effect on pheny…
1611	MUTAGEN	4	n->h	35	[u'[\'/note="n->a: 200-fold decrease in catalytic activity and almost 2-fold increase in affinity."\', \'/note="n->h: 350-fold decrease in catalytic activity and almost 2-fold increase in affinity."\']', u'[\'/note="n->v: reduced activity."\', \'/note="n->h: completely defective."\']', u'[\'/note="n->h: strongly reduces cytotoxic activity."\']', u'[\'/note="n->h: large decrease in catalytic activ…
1612	MUTAGEN	16	h->l	34	[u'[\'/note="h->l: abolishes dna religation activity."\']', u'[\'/note="h->l: 35-fold decrease in kinase activity."\']', u'[\'/note="h->l: 2-fold decrease in kinase activity but nearly no change in substrates affinity."\']', u'[\'/note="h->l: lack of phosphorylation. cannot respond to acetoacetate induction."\']', u'[\'/note="h->l: loss of r-loop unwinding."\']', u'[\'/note="h->l: results in loss…
1613	MUTAGEN	11	w->f	33	[u'[\'/note="w->f: decrease in activity; reduced affinity for decaprenyl diphosphate substrate analog."\']', u'[\'/note="w->f: decrease in affinity for ipp."\']', u'[\'/note="w->f: decrease in affinity for both ipp and decaprenyl diphosphate substrate analog."\']', u'[\'/note="w->f: reduces the specific dhna-coa synthase activity by 530-fold, whereas its affinity for hydrogencarbonate is reduced …
1614	MUTAGEN	14	r->h	32	[u'[\'/note="r->h: in lamb1040; reduces ligand affinity and pore size, no longer selective for maltodextrins. reduced starch binding, grows on maltodextrins, no change in phage lambda binding."\']', u'[\'/note="r->h: catalytically inactive for both the glutamine- dependent and ammonia-dependent reactions and fails to interact with paba."\']', u'[\'/note="r->h: in secy39; cold-sensitive."\']', u'[…
1615	MUTAGEN	6	emgydwlgrmpykgsvengaykaqgvqltak->cmgydwlgrmpykgsveng aykaqgvqltac	31	[u'[\'/note="emgydwlgrmpykgsvengaykaqgvqltak->cmgydwlgrmpykgsveng aykaqgvqltac: nearly normal growth in absence of nacl, reducing agent (0.05% beta-mercaptoethanol) has no effect."\', \'/note="e->c: modifies gate residues, no activity in oxidizing conditions, in reducing conditions activity channel opens frequently, probably forms a disulfide cross- link in channel, grows very poorly in the absen…
1616	MUTAGEN	5	y->h	31	[u'[\'/note="y->h: displays relaxed substrate specificity since it gains kinase activity toward sugars as diverse as d- galacturonic acid, d-talose, l-altrose, and l-glucose. also shows enhanced turnover of the small pool of sugars converted by the wild-type enzyme."\']', u'[\'/note="y->h: large decrease in recombination, loss of chi hotspot activity, decreased recb helicase rate, retains nucleas…
1617	MUTAGEN	12	h->r	31	[u'[\'/note="h->s,c,y: decreased ability (greater than 70%) to reduce fumarate."\', \'/note="h->r: inactivates enzyme."\']', u'[\'/note="h->r: lack of protease activity. increases sensitivity to erythromycin."\']', u'[\'/note="h->r: in hflb29; increases the frequency of lysogenization of phage lambda."\']', u'[\'/note="h->a: no effect."\', \'/note="h->r: increases dna binding affinity."\']', u'[\…
1618	MUTAGEN	7	rr->aa	30	[u'[\'/note="r->e: no change in spacer acquisition in vivo."\', \'/note="rr->aa: no spacer acquisition, significantly decreased protospacer binding."\']', u'[\'/note="rr->aa: no spacer acquisition, significantly decreased protospacer binding."\', \'/note="r->e: dramatically decreased spacer acquisition in vivo."\']', u'[\'/note="rr->aa: strongly reduces rna binding. reduces rna degradation."\']',…
1619	MUTAGEN	5	g->l	30	[u'[\'/note="g->a: no effect."\', \'/note="g->l: reduced acyltransferase activity."\']', u'[\'/note="g->l: complete loss of catalytic activity. still capable of binding mpt and mgd and interacting with both moea and mobb."\']', u'[\'/note="g->l: nearly no effect on catalytic activity."\']', u'[\'/note="g->l: loss of activity."\']', u'[\'/note="g->l: no change in activity."\']']
1620	MUTAGEN	5	m->i	29	[u'[\'/note="m->i: loss of copper resistance."\']', u'[\'/note="m->i: no change in copper resistance."\']', u'[\'/note="m->i: slight decrease in copper resistance."\']', u'[\'/note="mtm->iti: binds cu(+) very poorly, does not receive cu(+) from copa."\', \'/note="m->i: loss of copper resistance and strong decrease in copper binding; when associated with i-71."\']', u'[\'/note="mtm->iti: binds cu(…
1621	MUTAGEN	4	h->e	29	[u'[\'/note="h->e: abolishes dna recombination (in vitro)."\']', u'[\'/note="h->e: lack of autokinase activity."\']', u'[\'/note="h->c: loss of phosphotransferase activity. unable to dimerize."\', \'/note="h->e: results in the formation of a single complex corresponding to the productive phosphoryl transfer complex."\']', u'[\'/note="h->e: decreased fe(2+) oxidation activity. is also severely res…
1622	MUTAGEN	9	d->r	28	[u'[\'/note="d->a: no effect on spacer acquisition."\', \'/note="missing: loss of spacer acquisition, no cas1-cas2 complex formation, loss of crispr dna-binding by complex (beta6-beta7 deletion)."\', \'/note="d->r: slight decrease in spacer acquisition. loss of spacer acquisition; when associated with r-65."\']', u'[\'/note="d->r: decreases binding to ycgr."\']', u'[\'/note="d->r: shows very litt…
1623	MUTAGEN	6	h->a,n	28	[u'[\'/note="h->q: 200-fold decrease in catalytic efficiency."\', \'/note="h->a,n: less than 0.01% of wild-type enzymatic activity."\']', u'[\'/note="h->a,n: does not complement a deletion strain."\']', u'[\'/note="h->a,n: does not complement a deletion strain, has dominant lethal effect in presence of wild-type gene, probably due to repression of the wild-type gene."\']', u'[\'/note="h->a,n: sho…
1624	MUTAGEN	1	lag->taa	27	[u'[\'/note="lag->taa: 7.5-fold decrease in affinity for gtp and nearly no effect on catalytic activity. displays a 3-fold decrease in activity with gtp and gains a low activity with ctp as substrate; when associated with 79-llts-82."\']']
1625	MUTAGEN	6	v->g	27	[u'[\'/note="v->a: retains 70% of wild-type activity with phytate as substrate."\', \'/note="v->g: retains less than 10% of wild-type activity with phytate as substrate."\']', u'[\'/note="v->g: lowers gtpase activity 5 to 10-fold."\']', u'[\'/note="v->g: loss of activity."\']', u'[\'/note="v->a: produces 35% of isoform beta (i.e. only beta2)."\', \'/note="v->e: produces 70% of isoform beta (i.e. …
1626	MUTAGEN	6	h->y	27	[u'[\'/note="h->y: dominant negative to wild-type, decreased dna- binding."\']', u'[\'/note="heagh->keagk: loss of protease function."\', \'/note="h->y: loss of protease function."\']', u'[\'/note="h->y: in ee17."\']', u'[\'/note="h->y: partially restores chloramphenicol resistance to an acrz g30r mutant."\']', u'[\'/note="h->y: reduced activity."\']', u'[\'/note="h->y: loss of proteolytic activi…
1627	MUTAGEN	11	p->l	26	[u'[\'/note="p->l: high levels of persister cells formed which survive better than wild-type in ampicillin or ciprofloxacin, decreased affinity for hipb-operator."\']', u'[\'/note="p->l: in secy161; altered signal sequence interaction."\']', u'[\'/note="p->l: lack of activity."\']', u'[\'/note="p->l: in ftsw1640; ts; blocks division at a late stage."\']', u'[\'/note="p->l: in ftsw263; ts; blocks …
1628	MUTAGEN	7	r->m	26	[u'[\'/note="r->m: abolishes protein translocation."\']', u'[\'/note="r->m: ef-tu-binding and ef-tu-promoted gtp hydrolysis reduced."\']', u'[\'/note="r->e,y: no activity."\', \'/note="r->m: 400-fold lower activity."\']', u'[\'/note="r->m: improves chromate reductase activity compared to the wild-type enzyme."\']', u'[\'/note="r->m: 100-fold decrease in desuccinylase activity. 3-fold decrease in …
1629	MUTAGEN	8	k->e	26	[u'[\'/note="k->e: eliminates rpos proteolysis. lack of interaction with rssb."\']', u'[\'/note="k->a,q,r: 1% activity; not secreted."\', \'/note="k->e: 94% activity; not secreted."\']', u'[\'/note="k->e: abolishes association of homodimers into homotetramers. strongly reduces dnaa-dependent dna synthesis."\']', u'[\'/note="k->e: slight decrease in activity and 130-fold increase in substrate affi…
1630	MUTAGEN	8	d->e,n	26	[u'[\'/note="d->e,n: loss of reductoisomerase activity."\']', u'[\'/note="d->f: obliterates all binding and catalysis."\', \'/note="d->e,n: causes a significant decrease in binding affinity in the absence of monovalent cations or in the presence of potassium ions, but only a moderate decrease in the presence of sodium ions."\']', u'[\'/note="dd->ee,gg: loss of activity in vivo. decrease in activi…
1631	MUTAGEN	4	d->v	25	[u'[\'/note="d->v: increases the proteolytic activity."\']', u'[\'/note="d->e: 22% activity."\', \'/note="d->v: no activity."\']', u'[\'/note="d->e: 3% activity."\', \'/note="d->v: no activity."\']', u'[\'/note="d->v: loss of function."\']']
1632	MUTAGEN	6	d->k	25	[u'[\'/note="d->k: strongly reduced potassium efflux."\']', u'[\'/note="d->k: cuts rsea without previous degs cleavage."\']', u'[\'/note="d->a: slightly reduces affinity for d-ala and l- ala."\', \'/note="d->k: reduces catalytic activity. slightly reduces affinity for d-ala and l-ala."\']', u'[\'/note="d->k: abolishes iron binding and increases kinetics of fe-s formation on iscu; when associated …
1633	MUTAGEN	1	ll->mm	24	[u'[\'/note="ll->mm: wild-type resistance to efflux substrates. protein unstable; when associated with 223-m-m-224."\']']
1634	MUTAGEN	1	hdnqre->aaaaaa	24	[u'[\'/note="hdnqre->aaaaaa: no effect on affinity for xanthine and guanine substrates. however, the catalytic activity is highly reduced (200-fold when guanine is used as substrate) and the inhibition by gmp is also affected."\']']
1635	MUTAGEN	1	fl->mm	24	[u'[\'/note="fl->mm: wild-type resistance to efflux substrates. protein unstable; when associated with 287-m-m-288."\']']
1636	MUTAGEN	6	d->s	24	[u'[\'/note="d->s: loss of activity."\']', u'[\'/note="d->s: reduces activity by 88%."\']', u'[\'/note="d->s: 18000-fold reduction of catalytic rate."\']', u'[\'/note="d->s: 35% decrease of activity."\']', u'[\'/note="d->a: strongly reduced activation of potassium efflux by glutathione adducts."\', \'/note="d->g: mildly reduced activation of potassium efflux by glutathione adducts."\', \'/note="d…
1637	MUTAGEN	7	l->q	23	[u'[\'/note="l->q: loss of chaperone activity. retains atpase activity."\']', u'[\'/note="l->q: 75% decrease in chaperone activity; retains atpase activity."\']', u'[\'/note="l->q: 30% decrease in chaperone activity; retains atpase activity."\']', u'[\'/note="l->q: increased sensitivity to hu upon overexpression, supports normal growth, no effect in mazef/relbe or tonb deletions."\']', u'[\'/note…
1638	MUTAGEN	1	qiprvakarnl->aipaasksana	22	[u'[\'/note="qiprvakarnl->aipaasksana: cell does not grow at low potassium concentrations."\']']
1639	MUTAGEN	5	s->l	22	[u'[\'/note="s->l: suppresses pdeh disruption motility mutant, swimming velocity is between disruption and wild-type. in the wt background velocity is reduced."\']', u'[\'/note="s->l: defective binding to arg box."\']', u'[\'/note="s->l: reduced activity."\']', u'[\'/note="s->l: confers resistance to quinolones. no effect on catalytic activity."\']', u'[\'/note="s->l: resistant to inhibitory effe…
1640	MUTAGEN	2	kaqttrhrivg->r	22	[u'[\'/note="kaqttrhrivg->r: in era-de; does not complement a disruption mutant, overexpression in a wt cells inhibits growth. binds gtp poorly, km for gtp increases 5-fold, vmax for gtpase is 55% that of wt. does not autophosphorylate. complements cold-sensitivity and 16s rrna processing in an rbfa disruption mutant."\']', u'[\'/note="tt->aa: does not complement a disruption mutant, km for gtp i…
1641	MUTAGEN	6	q->r	21	[u'[\'/note="q->r: 2-fold decrease in degp induction when overexpressed."\']', u'[\'/note="q->r: abolishes association with muke and mukf, but still binds dna."\']', u'[\'/note="q->r: in pt2m217."\']', u'[\'/note="q->r: in fira200; confers temperature sensitivity and reverses the rifampicin resistance of rpob mutants."\']', u'[\'/note="q->r: resistant to fluoroquinolones."\']', u'[\'/note="q->r: …
1642	MUTAGEN	8	r->s	21	[u'[\'/note="r->s: decreases maltodextrin affinity, increases sucrose binding and transport."\']', u'[\'/note="r->s: loss of activity."\']', u'[\'/note="r->s: does not affect localization, but affects its thermosensitivity."\']', u'[\'/note="r->s: not targeted to the membrane, does not support anaerobic growth."\']', u'[\'/note="r->s: electron transfer from the 4fe-4s clusters of dmsb to the mo-b…
1643	MUTAGEN	1	qgkklvagmdvniddeigdde->hstrketcrwhgrqh	21	[u'[\'/note="qgkklvagmdvniddeigdde->hstrketcrwhgrqh: in prlf1; suppresses overproduction lethality of lamb-lacz gene fusions, leads to decreased beta-galactosidase activity. partially alleviates yhav toxic activity."\']']
1644	MUTAGEN	6	a->d	21	[u'[\'/note="a->g,s: almost wild-type activity."\', \'/note="a->d: less than 5% of wild-type activity."\']', u'[\'/note="a->d: no effect."\']', u'[\'/note="a->d: strong decrease in copper resistance."\']', u'[\'/note="a->d: disrupts the interaction with escherichia phage lambda antitermination protein q."\']', u'[\'/note="a->d: decreases degradation by ftsh."\']', u'[\'/note="a->d: confers sensit…
1645	MUTAGEN	3	i->s	20	[u'[\'/note="i->s: loss of function."\']', u'[\'/note="i->s: decrease in ppiase activity, but has little impact on chaperone activity and interaction with hypb. almost complete loss of ppiase activity; when associated with y-132."\']', u'[\'/note="i->s: resistant to antibiotics salinamide a and b."\']']
1646	MUTAGEN	3	i->w	20	[u'[\'/note="i->w: no quinol oxidase activity."\']', u'[\'/note="i->w: some suppression of the pdeh disruption motility phenotype, no binding to flim."\']', u'[\'/note="i->w: no effect."\']']
1647	MUTAGEN	8	a->g	20	[u'[\'/note="a->d: decreased protein stability, significantly reduced degradation of pape."\', \'/note="a->v: decreased protein stability, significantly reduced degradation of pape, retains most cpx inhibition activity."\', \'/note="a->g: decreased protein stability, wild-type degradation of pape."\']', u'[\'/note="a->g: 96% increase in the affinity for l-alpha- lysine. 4-fold decrease in the cat…
1648	MUTAGEN	9	r->g	20	[u'[\'/note="r->g: not processed into its subunits, loss of enzymatic activity."\']', u'[\'/note="r->g: loss of activity with phytate as substrate."\', \'/note="r->a: loss of activity with pnpp and phytate as substrates."\']', u'[\'/note="r->a: shows residual activity with pnpp as substrate. loss of activity with phytate as substrate."\', \'/note="r->g: loss of activity with phytate as substrate.…
1649	MUTAGEN	6	s->t	20	[u'[\'/note="s->t: complete loss of aminodeoxychorismate synthase activity."\']', u'[\'/note="s->a: 40-fold lower specific activity."\', \'/note="s->t: no activity."\']', u'[\'/note="s->a: 2% of wild-type activity."\', \'/note="s->t: 20-fold increase in the non-specific phosphoglucomutase activity towards glucose-phosphate substrates (non aminated)."\']', u'[\'/note="s->a: no processing of the pr…
1650	MUTAGEN	1	rvsktvkggr->avsktvkgga	20	[u'[\'/note="rvsktvkggr->avsktvkgga: no effect on mrna unwinding ability of the ribosome."\']']
1651	MUTAGEN	2	r->a,d	20	[u'[\'/note="r->a,d: reduces rna cleavage by 89%."\']', u'[\'/note="r->a,d: decreases dna-binding, decreases thermostability of mqsr-mqsa complex."\']']
1652	MUTAGEN	2	n->h,k	20	[u'[\'/note="n->d: loss of activity, reaction intermediate detectable."\', \'/note="n->h,k: loss of activity, reaction intermediate not detectable."\']', u'[\'/note="n->h,k: resistant to antibiotics salinamide a and b."\']']
1653	MUTAGEN	3	h->a,q	20	[u'[\'/note="h->a,q: loss of enzyme activity."\']', u'[\'/note="h->a,q: almost complete loss of 3-hydroxyacyl-coa dehydrogenase activity."\']', u'[\'/note="h->a,q: 135 to 200-fold reduction in catalytic activity."\']']
1654	MUTAGEN	11	w->l	19	[u'[\'/note="w->l: 10% of wild-type phenylalanine transport activity."\']', u'[\'/note="w->l: 39% of wild-type phenylalanine transport activity."\']', u'[\'/note="w->l: 71% of wild-type phenylalanine transport activity."\']', u'[\'/note="w->l: decrease in spermidine excretion."\']', u'[\'/note="w->l: 60% of wild-type activity. 41% of wild-type activity; when associated with l-26."\']', u'[\'/note…
1655	MUTAGEN	12	t->i	19	[u'[\'/note="t->i: loss of activity."\']', u'[\'/note="t->i: does not regulate the s10 operon; assembles into ribosomes in vivo."\']', u'[\'/note="t->i: complete loss of motility."\']', u'[\'/note="t->i: this mutant is sensitive to glyphosate and causes a substantial decrease in the affinity for pep. insensitive to glyphosate but maintains high affinity for pep. it causes a shift of residue g96 t…
1656	MUTAGEN	2	a->e	18	[u'[\'/note="a->e: resistant to antibiotics salinamide a and b."\']', u'[\'/note="a->e: decrease in activity."\']']
1657	MUTAGEN	1	t->s,v	18	[u'[\'/note="t->s,v: 80% reduced protease activity."\']']
1658	MUTAGEN	1	manrmilne->m	18	[u'[\'/note="manrmilne->m: loss of enzyme activity, loss of dimerization."\']']
1659	MUTAGEN	5	v->d	18	[u'[\'/note="v->d: becomes sensitive to phage k3h1, ox2h5, ox2h20, partially sensitive to phages ox2, ox4, ox5, m1. increased resistance to colicin l."\']', u'[\'/note="v->d: ef-tu-binding and ef-tu-promoted gtp hydrolysis reduced."\']', u'[\'/note="v->d: does not regulate the s10 operon in vivo."\']', u'[\'/note="v->d: decreases binding to ycgr."\']', u'[\'/note="v->d: decreases degradation by f…
1660	MUTAGEN	1	e->w	18	[u'[\'/note="e->w: partial loss of protease activity."\']']
1661	MUTAGEN	2	ehpstsdqd->vdypydvpdya	18	[u'[\'/note="ehpstsdqd->vdypydvpdya: loop 4 to ha epitope; still susceptible to cdia-ec93."\']', u'[\'/note="ehpstsdqd->vdypydvpdya: loop 4 to ha epitope; still susceptible to cdia-ec93."\', \'/note="pstsdqdn->g: delta loop 4; slight increase in resistance to cdia-ec93, forms aggregates with cdia-ec93 cells."\']']
1662	MUTAGEN	7	k->l	18	[u'[\'/note="k->l: does not significantly alter the affinity for nadph. slight increase of the catalytic efficiency. inversion of cofactor specificity from nadph to nadh; when associated with d-68, v-75 and d-76."\']', u'[\'/note="k->r: 10-fold decrease in activity."\', \'/note="k->l: 20-fold decrease in activity."\']', u'[\'/note="k->l: no effect."\']', u'[\'/note="k->l: lack of activity."\']', …
1663	MUTAGEN	1	n->d,l	18	[u'[\'/note="n->d,l: reduces rna cleavage by over 96%."\']']
1664	MUTAGEN	1	y->g	18	[u'[\'/note="y->g: partial loss of protease activity."\']']
1665	MUTAGEN	7	g->e	18	[u'[\'/note="g->e: in dnan159; a temperature- and uv-sensitive mutation, displays altered dna polymerase usage, chronically induced sos response; when associated with a- 174."\']', u'[\'/note="g->e: in secy100; temperature-sensitive."\']', u'[\'/note="g->e: loss of nad binding and enzyme activity."\']', u'[\'/note="rdctgkr->gdctgkg: slight reduction in 50s subunit binding."\', \'/note="g->e: temp…
1666	MUTAGEN	1	rr->dd	18	[u'[\'/note="rr->dd: abolishes enzyme activity."\']']
1667	MUTAGEN	2	gar->aaa	18	[u'[\'/note="gar->aaa: no effect on oligomerization."\']', u'[\'/note="gar->aaa: no effect on oligomerization."\', \'/note="r->a: loss of ability to form oligomers; loss of chaperone activity."\']']
1668	MUTAGEN	4	l->n	17	[u'[\'/note="l->n: no in vivo protease activity, no in vitro atpase activity."\']', u'[\'/note="l->n: loss of proteolytic activity."\']', u'[\'/note="l->n: shows mg(2+)-dependent signaling and displays higher gene activation activity than wild-type; when associated with a-202."\']', u'[\'/note="l->n: shows mg(2+)-dependent signaling and partial gene activation activity; when associated with a-202…
1669	MUTAGEN	6	s->n	17	[u'[\'/note="s->a: reduced ability to repress."\', \'/note="s->n: super-repressor, non-inducible phenotype, cells cannot use long chain fatty acids as carbon source. protein has 10-fold decreased affinity for c18:1-coa, can still bind faba dna and alter transcription."\']', u'[\'/note="s->n: in pt2m217."\']', u'[\'/note="s->n: no effect on persister cell formation upon overexpression."\']', u'[\'…
1670	MUTAGEN	9	g->r	17	[u'[\'/note="g->e: suppresses pdeh disruption motility mutant, swimming velocity is wild-type."\', \'/note="g->v: suppresses pdeh disruption motility mutant, swimming velocity is between disruption and wild-type. in the wt background velocity is reduced."\', \'/note="g->r: suppresses pdeh disruption motility mutant, swimming velocity is between disruption and wild-type."\']', u'[\'/note="g->r: in…
1671	MUTAGEN	2	amdeqgkslddflikq->kqwmrkvnpstis	16	[u'[\'/note="missing: derepression of prov expression, loss of dna-binding, increased oligomerization. no longer complements a deletion mutant, has dominant-negative effects on wild-type protein, oligomerizes."\', \'/note="missing: no longer complements a deletion mutant, has dominant-negative effects on wild-type protein, oligomerizes."\', \'/note="amdeqgkslddflikq->kqwmrkvnpstis: partial loss o…
1672	MUTAGEN	2	rssk->assa	16	[u'[\'/note="rssk->assa: loss of spacer acquisition in vivo."\', \'/note="r->a: no effect on spacer acquisition."\', \'/note="r->e: loss of spacer acquisition."\']', u'[\'/note="rssk->assa: loss of spacer acquisition in vivo."\']']
1673	MUTAGEN	2	pstsdqdn->g	16	[u'[\'/note="ehpstsdqd->vdypydvpdya: loop 4 to ha epitope; still susceptible to cdia-ec93."\', \'/note="pstsdqdn->g: delta loop 4; slight increase in resistance to cdia-ec93, forms aggregates with cdia-ec93 cells."\']', u'[\'/note="pstsdqdn->g: delta loop 4; slight increase in resistance to cdia-ec93, forms aggregates with cdia-ec93 cells."\']']
1674	MUTAGEN	5	e->d,q	16	[u'[\'/note="e->d,q: loss of reductoisomerase activity."\']', u'[\'/note="e->d,q: reduces activity 100000-fold."\']', u'[\'/note="e->d,q: loss of function."\']', u'[\'/note="e->d,q: transports manganese to a very low level."\']', u'[\'/note="e->d,q: loss of catalytic activity."\']']
1675	MUTAGEN	3	d->n,a	16	[u'[\'/note="d->n,a: loss of catalytic activity."\']', u'[\'/note="d->n,a: 1000-fold reduction in catalytic activity. no significant change in substrate affinity."\']', u'[\'/note="d->n,a: loss of activity."\']']
1676	MUTAGEN	6	m->v	16	[u'[\'/note="m->v: in rcsa*; increases stability and capsule synthesis."\']', u'[\'/note="m->v: protein is not produced, (and therefore neither is seca) indicating this is the start codon."\']', u'[\'/note="m->v: resistant to antibiotics salinamide a and b."\']', u'[\'/note="m->y: increases catalytic rate almost 2-fold. increases catalytic rate about 7-fold; when associated with n-16; l-20; a-85;…
1677	MUTAGEN	5	k->i	16	[u'[\'/note="k->i: it has all activities of cysg. it is able to bind adomet."\']', u'[\'/note="k->i: loss of enzymatic activity; but no loss of repression function."\']', u'[\'/note="k->r: reduction of the catalytic efficiency by 35%. no effect on the affinity for cholate and nad."\', \'/note="k->i: reduction of the catalytic efficiency by 95%. no effect on the affinity for cholate and nad."\']',…
1678	MUTAGEN	8	k->d	16	[u'[\'/note="k->d: impairs localization."\']', u'[\'/note="k->d: increases the basal rate of rsea cleavage 3- fold, acts synergistically with an rseb disruption."\']', u'[\'/note="k->d: no effect."\']', u'[\'/note="k->d: lack of 3hpp transport activity."\']', u'[\'/note="k->d: no alteration of the growth, expression, or catalytic activities."\']', u'[\'/note="k->d: catalyzes the adenylation react…
1679	MUTAGEN	3	revr->aeva	16	[u'[\'/note="r->e: dramatically decreased spacer acquisition in vivo."\', \'/note="revr->aeva: loss of spacer acquisition in vivo."\', \'/note="r->d: decreased spacer acquisition."\', \'/note="r->a: no effect on spacer acquisition."\']', u'[\'/note="revr->aeva: loss of spacer acquisition in vivo."\']', u'[\'/note="r->e: dramatically decreased spacer acquisition in vivo."\', \'/note="revr->aeva: l…
1680	MUTAGEN	8	g->c	16	[u'[\'/note="emgydwlgrmpykgsvengaykaqgvqltak->cmgydwlgrmpykgsveng aykaqgvqltac: nearly normal growth in absence of nacl, reducing agent (0.05% beta-mercaptoethanol) has no effect."\', \'/note="g->d: becomes sensitive to phages k4, k5, k3h1, partially sensitive to phages tuii*-6, tuii*-24, k3, m1."\', \'/note="g->r,v: becomes partially sensitive to phages k3h1, m1."\', \'/note="g->c: becomes sensi…
1681	MUTAGEN	7	h->f	16	[u'[\'/note="h->f: does not complement deletion mutant."\']', u'[\'/note="h->f: loss of activity."\']', u'[\'/note="h->n: abolishes enzyme activity."\', \'/note="h->f: about 1% quinol oxidase activity."\']', u'[\'/note="h->a: 514-fold decrease in catalytic efficiency toward benzoyl-coa."\', \'/note="h->f: almost loss of activity with benzoyl-coa as substrate."\']', u'[\'/note="h->a: decrease in a…
1682	MUTAGEN	3	h->n,q	15	[u'[\'/note="h->a: no overall activity. abolishes formation of guanylylated rtcb intermediate. can ligate pre-guanylated nucleotide substrates."\', \'/note="h->n,q: loss of function. abolishes formation of guanylylated rtcb intermediate."\']', u'[\'/note="h->n,q: loss of activity."\']', u'[\'/note="h->n,q: strongly decreased catalytic efficiency."\']']
1683	MUTAGEN	7	k->s	15	[u'[\'/note="k->s: dominant negative to wild-type, decreased dna- binding."\']', u'[\'/note="k->s: decrease in activity."\']', u'[\'/note="k->r: reduces catalytic activity 20-fold."\', \'/note="k->s: nearly abolishes catalytic activity."\']', u'[\'/note="k->s: reduces activity by 84%; when associated with s-88."\']', u'[\'/note="k->s: reduces activity by 84%; when associated with s-86."\']', u'[\…
1684	MUTAGEN	3	n->i	15	[u'[\'/note="n->h: 0.4% of wild-type activity."\', \'/note="n->s: 37% of wild-type activity."\', \'/note="n->a: 31% of wild-type activity."\', \'/note="n->i: 0.3% of wild-type activity."\']', u'[\'/note="n->i: restores resistance to sds, high salt, acid and cholate."\']', u'[\'/note="n->i: loss of proteolytic activity."\']']
1685	MUTAGEN	5	s->g	14	[u'[\'/note="s->g: 93% of wild-type activity."\']', u'[\'/note="s->g: 87% of wild-type activity."\']', u'[\'/note="s->g: 2% of wild-type gsh transferase activity."\']', u'[\'/note="s->a: weakly active. 3-fold decrease in affinity. fast ketonisation and slow c-c cleavage."\', \'/note="s->g: weakly active. 3-fold decrease in affinity. fast ketonisation and slow c-c cleavage."\']', u'[\'/note="s->t:…
1686	MUTAGEN	5	e->r	14	[u'[\'/note="e->a: no effect on spacer acquisition."\', \'/note="e->r: slight decrease in spacer acquisition, cas1- cas2 complex formation or crispr dna-binding by complex. loss of spacer acquisition; when associated with r-84."\']', u'[\'/note="e->r: decreases binding to ycgr."\']', u'[\'/note="e->r: shows very little activation of expression of either mtr or tyrp. does not affect repression of …
1687	MUTAGEN	1	masayedpkevief->aasaaedpkeaiea	14	[u'[\'/note="masayedpkevief->aasaaedpkeaiea: significantly decreased affinity for substrate phoa, significantly decreases antiaggregation activity."\']']
1688	MUTAGEN	1	qrrggkg->aaaaaaa	14	[u'[\'/note="missing: loss of gyrase-mediated dna wrapping, nearly complete loss of dna supercoiling activity, no change in dna supercoil relaxation or dna decatenation activity."\', \'/note="qrrggkg->aaaaaaa: loss of gyrase-mediated dna wrapping, nearly complete loss of dna supercoiling activity, no change in dna supercoil relaxation or dna decatenation activity."\']']
1689	MUTAGEN	8	f->y	14	[u'[\'/note="f->a: loss of atpase activity."\', \'/note="f->y: slight decrease in atpase activity."\']', u'[\'/note="f->y: in prla4-1; altered signal sequence interaction."\']', u'[\'/note="f->y: 1.5-fold decrease in activity."\']', u'[\'/note="f->y: loss of mutase activity."\']', u'[\'/note="f->y: almost complete loss of ppiase activity, but has little impact on chaperone activity and interactio…
1690	MUTAGEN	6	e->a,d,q	13	[u'[\'/note="e->a,d,q: important decrease in catalytic efficiency and affinity."\']', u'[\'/note="e->a,d,q: loss of activity."\', \'/note="e->c: 50% of wild-type specific activity."\']', u'[\'/note="e->a,d,q: loss of l-fucose transport."\']', u'[\'/note="e->a,d,q: abolishes enzyme activity."\']', u'[\'/note="e->a,d,q: loss of activity."\']', u'[\'/note="e->a,d,q: reduces nick joining activity by …
1691	MUTAGEN	6	l->r	13	[u'[\'/note="l->r: no change in activity. correctly assembled, interacts with ftsb and ftsl, but fails to localize efficiently to the cell division site; when associated with r-32. does not insert into the membrane and lack of activity; when associated with r-32 and p-38."\']', u'[\'/note="l->r: no change in activity. correctly assembled, interacts with ftsb and ftsl, but fails to localize effici…
1692	MUTAGEN	8	q->e	13	[u'[\'/note="q->e: loss of activity."\']', u'[\'/note="q->e: 3-fold decrease in activity."\']', u'[\'/note="q->e: no activity."\']', u'[\'/note="q->e: decrease in activity; no effect on dna- binding."\']', u'[\'/note="q->e: loss of methylation. no longer allows arfa to rescue stalled ribosomes."\']', u'[\'/note="q->e: increases affinity for nitrite without changing vmax."\']', u'[\'/note="q->a: s…
1693	MUTAGEN	4	q->h	13	[u'[\'/note="q->h: no longer inhibits cpx pathway in wild-type cells, protein more susceptible to degp, in the absence of degp protease partially inhibits cpx."\']', u'[\'/note="q->h: loss of mischarged trna editing activity; when associated with a-666."\']', u'[\'/note="q->h: impairs septal localization."\']', u'[\'/note="q->h: large decrease in catalytic activity and substrate affinity, and inc…
1694	MUTAGEN	3	kgidleskkitih->agidlesaaitia	13	[u'[\'/note="kgidleskkitih->agidlesaaitia: wild-type cu(+) binding, 50% decrease in cu transfer from copa; when associated with a-72."\']', u'[\'/note="kgidleskkitih->agidlesaaitia: wild-type cu(+) binding, 50% decrease in cu transfer from copa; when associated with a-72."\', \'/note="d->n: no change in copper resistance."\']', u'[\'/note="kgidleskkitih->agidlesaaitia: wild-type cu(+) binding, 50…
1695	MUTAGEN	6	v->m	13	[u'[\'/note="v->m: loss of atpase activity and transport."\']', u'[\'/note="v->m: in ompr2; ompf+ constitutive, ompc-."\']', u'[\'/note="v->m: 10-fold decrease in catalytic efficiency toward lauroyl-coa. does not affect catalytic efficiency toward 1,4-dihydroxy-2-naphthoyl-coa and benzoyl-coa."\']', u'[\'/note="v->m: increased frequency of precise excision of transposon tn10 derivatives (mutant s…
1696	MUTAGEN	3	d->a,e,n	13	[u'[\'/note="d->a,e,n: no change in activity."\']', u'[\'/note="d->a,e,n: 30000-fold reduction in catalytic efficiency, binds rna normally. partially rescued by mn(2+)."\']', u'[\'/note="d->a,e,n: reduces activity 50- to 580-fold depending on the metal ion bound. binds only one equivalent of the divalent metal cation with affinities identical to the wild-type enzyme."\']']
1697	MUTAGEN	4	r->a,k	13	[u'[\'/note="r->a,k: decreased affinity for glutamine and catalytic activity."\']', u'[\'/note="r->a,k: important decrease in catalytic efficiency and affinity."\']', u'[\'/note="r->a,k: loss of activity."\']', u'[\'/note="r->a,k: no loss of activity."\']']
1698	MUTAGEN	2	n->d,q	13	[u'[\'/note="n->d,q: loss of activity."\']', u'[\'/note="n->d,q: lack of activity."\']']
1699	MUTAGEN	5	f->w	13	[u'[\'/note="f->w: lacks oxidoreductase activity, but is still able to activate potassium efflux."\']', u'[\'/note="f->w: 11-fold decrease in specific activity."\']', u'[\'/note="f->w: enhances susceptibility to csa inhibition."\']', u'[\'/note="f->w: same activity as the wild-type."\']', u'[\'/note="f->w: decrease of aldolase activity mostly due to a decrease of the affinity for l-fuculose 1-pho…
1700	MUTAGEN	1	ceeascpnlaec->aeeasapnlaea	12	[u'[\'/note="ceeascpnlaec->aeeasapnlaea: loss of 1 4fe-4s cluster binding. loss of activity."\']']
1701	MUTAGEN	1	y->e,h	12	[u'[\'/note="y->f: 30-fold reduction in no dioxygenase activity, and 80-fold increase in the o(2) dissociation rate constant."\', \'/note="y->e,h: 15 to 35-fold reduction in no dioxygenase activity."\']']
1702	MUTAGEN	1	cf->id	12	[u'[\'/note="cf->id: converts the enzyme to have alpha- glucosidase activity."\']']
1703	MUTAGEN	4	s->w	12	[u'[\'/note="s->w: complete loss of trna editing; when associated with f-567 and f-666."\']', u'[\'/note="s->w: abolishes inhibition of gk by fbp via disruption of the dimer-tetramer assembly reaction. inhibition by eiia-glc is unchanged compared to wild type. the activity of this mutant is significantly higher than wild-type, and the michaelis constants are increased slightly compared to wild-ty…
1704	MUTAGEN	1	k->n,q	12	[u'[\'/note="k->r: almost wild-type activity."\', \'/note="k->n,q: reduced activity."\']']
1705	MUTAGEN	3	v->p	12	[u'[\'/note="v->p: abolishes enzyme activity."\']', u'[\'/note="v->p: no change in activity. does not insert into the membrane and lack of activity; when associated with r- 29 and r-32."\']', u'[\'/note="v->p: abolishes transport activity."\']']
1706	MUTAGEN	7	w->r	12	[u'[\'/note="w->r: decreases starch affinity, slightly increases maltose affinity."\']', u'[\'/note="w->r: great decrease in activity."\']', u'[\'/note="w->r: cuts rsea without previous degs cleavage."\']', u'[\'/note="w->r: loss of localization to the cell pole."\']', u'[\'/note="w->r: increases kinetics of fe-s formation on iscu."\']', u'[\'/note="w->r: resistant to both irap and irad. increase…
1707	MUTAGEN	1	yy->ss	12	[u'[\'/note="yy->ss: very poor loading of clamp on dna, polymerase speed is wild-type."\']']
1708	MUTAGEN	1	il->aa	12	[u'[\'/note="il->aa: monomeric in solution, binds very tightly to subunit delta (hola). the monomer binds tightly to linear and circular dna. cannot bind both pol iii and iv simultaneously."\']']
1709	MUTAGEN	6	d->l	12	[u'[\'/note="d->l: lack of activity."\']', u'[\'/note="d->l: complete loss of iron-binding."\']', u'[\'/note="d->l: eliminates the need for a metal cation at the homotrimer interface by substituting hydrophobic methyl- methyl interactions in place of the metal cation."\']', u'[\'/note="d->n: 1500-fold decrease in catalytic efficiency."\', \'/note="d->e: 44-fold decrease in catalytic efficiency."\…
1710	MUTAGEN	3	a->t,v	12	[u'[\'/note="a->t,v: complete loss of motility."\']', u'[\'/note="a->t,v: resistant to antibiotics salinamide a and b."\']', u'[\'/note="a->t,v: kirromycin resistant."\']']
1711	MUTAGEN	3	l->m	12	[u'[\'/note="l->w: ki for bn increases 1500-fold, no change in aminoacylation activity, supports growth in the presence of bn."\', \'/note="l->m: confers resistance to borrelidin (bn); km for l-thr is unchanged, km for atp increases to 163 um, ki for bn increases to 7.8 nm, supports growth in the presence of bn."\']', u'[\'/note="l->m: slight decrease in operator dna affinity."\']', u'[\'/note="l…
1712	MUTAGEN	1	q->a,n	12	[u'[\'/note="q->a,n: less than 0.01% of wild-type enzymatic activity."\']']
1713	MUTAGEN	1	f->l,a	12	[u'[\'/note="f->l,a: defective for rna-binding."\']']
1714	MUTAGEN	1	ke->aa	12	[u'[\'/note="ke->aa: no effect."\']']
1715	MUTAGEN	2	mdrivssshdrt->mtmitpslhdri	12	[u'[\'/note="mdrivssshdrt->mtmitpslhdri: protein is as sensitive to ftsh degradation as the wild-type."\']', u'[\'/note="mdrivssshdrt->mtmitpslhdri: protein is as sensitive to ftsh degradation as the wild-type."\', \'/note="missing: in ycca11; increases the half-life of overexpressed secy, f(0) atp synthase subunit a and itself in an hflkc-dependent fashion, but has no effect on degradation of cy…
1716	MUTAGEN	8	f->s	12	[u'[\'/note="f->s: utilizes the non-natural amino acid azatyrosine more efficiently than tyrosine. strong decrease in affinity for tyrosine and small increase in affinity for azatyrosine. temperature-sensitive."\']', u'[\'/note="f->s: slightly reduced toxicity, wild-type interaction with mreb, no longer interacts with ftsz, no longer blocks cell division, cells become spheroid. no longer toxic, n…
1717	MUTAGEN	5	g->p	12	[u'[\'/note="g->p: loss of activity."\']', u'[\'/note="g->p: loss of function."\']', u'[\'/note="g->p: lethal, wild-type protein levels."\']', u'[\'/note="g->p: loss of glutamine-dependent activity, but no change in ammonia-dependent activity."\']', u'[\'/note="g->p: resistant to inhibitory effects of alpha- methylglucoside but retains transport capacity."\']']
1718	MUTAGEN	8	p->g	11	[u'[\'/note="p->c: strong decrease in activity."\', \'/note="p->g: highly active."\']', u'[\'/note="p->a: retains 70% of wild-type activity with phytate as substrate."\', \'/note="p->g: retains 50% of wild-type activity with phytate as substrate."\']', u'[\'/note="p->g: reduced binding to single-stranded dna."\']', u'[\'/note="p->l: displays a 2-fold lower affinity binding for both s3p and pep. d…
1719	MUTAGEN	3	a->f	11	[u'[\'/note="a->f: the complex with mlc shows much weaker association than the wild-type."\']', u'[\'/note="a->f: loss of deacylation of d-tyrosyl-trna(tyr), loss of deacylation of glycyl-trna(gly), not toxic upon overexpression."\']', u'[\'/note="a->f: decreased conductance, due to decreased diameter of the channel portal."\']']
1720	MUTAGEN	5	q->l	11	[u'[\'/note="q->l: 60% stimulation of k(+) uptake by trkh."\']', u'[\'/note="q->l: loss of reductase activity. 30% of wild-type esterase activity."\']', u'[\'/note="q->a,e: same biofilm formation activity as wild- type. enhanced o(2) dissociation but not association rate constants. enhanced autoxidation rate constant."\', \'/note="q->l: same biofilm formation activity as wild-type. 5-fold reducti…
1721	MUTAGEN	1	qlqfeqaqtqq->alaffaaataa	11	[u'[\'/note="qlqfeqaqtqq->alaffaaataa: rsea is degraded by rsep in the absence of degs."\']']
1722	MUTAGEN	4	h->s	11	[u'[\'/note="h->s: severely affects succinate oxidation, decreases fumarate oxidation by 75%."\']', u'[\'/note="h->s: loss of activity."\']', u'[\'/note="hihh->gggg: loss of activity. no binding to tunicamycin."\', \'/note="h->s: loss of activity. no binding to tunicamycin."\']', u'[\'/note="h->a: 1170-fold decrease in catalytic efficiency with oxygen as electron acceptor. 83-fold decrease in cat…
1723	MUTAGEN	7	p->s	10	[u'[\'/note="p->s: in secy100; temperature-sensitive."\']', u'[\'/note="p->s: confers resistance to borrelidin (bn); km for l-thr is unchanged, km for atp increases to 187 um, ki for bn increases to 4.5 nm."\']', u'[\'/note="p->s: reduced acyltransferase activity."\']', u'[\'/note="p->s: about 63% methylase activity, binds s- adenosyl-methionine (sam) normally."\']', u'[\'/note="missing: partial …
1724	MUTAGEN	4	i->t	10	[u'[\'/note="i->t: in secy121; altered signal sequence interaction."\']', u'[\'/note="i->t: gain of function, increased counterclockwise rotation of flagella."\']', u'[\'/note="i->t: decrease in activity; no effect on dna- binding."\']', u'[\'/note="i->t: significant reduction in activity."\']']
1725	MUTAGEN	3	l->w	10	[u'[\'/note="l->w: slightly improves motility in a pdeh disruption mutant."\']', u'[\'/note="l->w: ability to transport lactose in a saturable manner."\']', u'[\'/note="l->w: growth on maltose but not on media containing either maltoheptaose or maltoheptaose plus maltose."\']']
1726	MUTAGEN	1	rramk->aaama	10	[u'[\'/note="rramk->aaama: decreases mrna unwinding ability of the ribosome."\']']
1727	MUTAGEN	4	a->q	10	[u'[\'/note="a->q: reduces chromosomal recombination but not plasmid resolution."\']', u'[\'/note="a->q: unable to recognize ente and entf. exhibits a decrease in the enterobactin production compared to the wild-type. still able to be phosphopantetheinylated."\']', u'[\'/note="a->q: 49% of wild-type specific activity. inactivates wild-type subunits; when associated with s-73."\']', u'[\'/note="a-…
1728	MUTAGEN	3	q->p	10	[u'[\'/note="q->p: no longer inhibits cpx pathway, protein more susceptible to degp."\']', u'[\'/note="q->p: resistant to antibiotics salinamide a and b."\']', u'[\'/note="q->w: significant suppression of the pdeh disruption motility phenotype."\', \'/note="q->p: significant suppression of the pdeh disruption motility phenotype, no binding to flim."\']']
1729	MUTAGEN	2	rvkfgagryr->avkfgagrya	10	[u'[\'/note="rvkfgagryr->avkfgagrya: complete loss of toxicity."\', \'/note="r->a: partial loss of toxicity."\']', u'[\'/note="rvkfgagryr->avkfgagrya: complete loss of toxicity."\']']
1730	MUTAGEN	4	s->d	10	[u'[\'/note="s->d: 12-fold increase of the reductoisomerase activity with nadh and slight decrease of the reductoisomerase activity with nadph."\']', u'[\'/note="s->d: localizes to the inner membrane, where it associates with peptidoglycan, thereby preventing separation of the two membranes. prolonged expression is lethal for the cell."\']', u'[\'/note="s->d: strongly impairs fdh activity."\']', …
1731	MUTAGEN	1	hscah->ascaa	10	[u'[\'/note="hscah->ascaa: no longer edits mischarged l-seryl- trna(thr), mischarges trna(thr) with l-serine, correct acylation is unaffected."\']']
1732	MUTAGEN	1	wfisq->levlfqg	10	[u'[\'/note="wfisq->levlfqg: cold-sensitive at 30 degrees celsius; when associated with 24-i--r-27. protein accumulates stably."\']']
1733	MUTAGEN	2	c->w	10	[u'[\'/note="c->w: abolishes enzyme activity."\']', u'[\'/note="cksmvrmc->apa: loss of repressor activity. loss of dna binding. reduces assembly into functionally active tetramers."\', \'/note="c->w: strongly reduced repressor activity. reduces dna binding. prevents assembly into functionally active tetramers."\']']
1734	MUTAGEN	1	pttvt->lvprgs	10	[u'[\'/note="pttvt->lvprgs: temperature-sensitive at 42 degrees celsius; when associated with 512-enlyfqg. protein is not stable."\']']
1735	MUTAGEN	4	qadmf->padmp	10	[u'[\'/note="qadmf->padmp: loss of interaction with beta sliding clamp (dnan)."\']', u'[\'/note="qadmf->padmp: loss of interaction with beta sliding clamp (dnan)."\', \'/note="adm->ldl: increases binding to beta sliding clamp (dnan), increases stability of enzyme complex."\']', u'[\'/note="qadmf->padmp: loss of interaction with beta sliding clamp (dnan)."\', \'/note="adm->ldl: increases binding t…
1736	MUTAGEN	3	h->k	10	[u'[\'/note="h->a: 25-fold lower formyltransferase activity."\', \'/note="h->k: less than 1% residual formyltransferase activity."\']', u'[\'/note="h->k: shows 40% of the wild-type rate of deamino- nadh oxidase. inhibited by 20-30% upon addition of 0.25 mm of decylubiquinone."\']', u'[\'/note="h->a: does not prevent transport of ammonia. loss of transport activity with methylammonium and methylam…
1737	MUTAGEN	5	h->p	10	[u'[\'/note="h->n: 29% of wild-type activity."\', \'/note="h->p: 5.4% of wild-type activity."\']', u'[\'/note="h->a: behaves like wild-type."\', \'/note="h->p: partially bypasses the requirement for peptide activation, acts synergistically with mutations that disrupt contacts between the protease and pdz domains and with an rseb disruption."\']', u'[\'/note="h->r: no effect."\', \'/note="h->p: lo…
1738	MUTAGEN	3	nafsr->aafsa	10	[u'[\'/note="n->a: 50-fold reduction in dna-binding."\', \'/note="nafsr->aafsa: abolishes dna-binding, including binding to the rpos promoter."\']', u'[\'/note="nafsr->aafsa: abolishes dna-binding, including binding to the rpos promoter."\']', u'[\'/note="r->a: 10-fold reduction in dna-binding."\', \'/note="nafsr->aafsa: abolishes dna-binding, including binding to the rpos promoter."\']']
1739	MUTAGEN	1	tsmaf->lslpl	10	[u'[\'/note="tsmaf->lslpl: increases binding to beta sliding clamp (dnan), increases stability of enzyme complex."\']']
1740	MUTAGEN	5	l->d	9	[u'[\'/note="l->d: impairs both localization and function, and reduces the efficiency of dimerization."\']', u'[\'/note="l->d: strongly reduced promoter binding and tetramerization."\']', u'[\'/note="l->d: loss of promoter binding and tetramerization."\']', u'[\'/note="l->d: 1.5-fold decrease in affinity for gtp."\']', u'[\'/note="l->a,k: wild-type function."\', \'/note="missing: no longer comple…
1741	MUTAGEN	6	strgrgiea->atdtknvqfv	9	[u'[\'/note="strgrgiea->atdtknvqfv: 10-fold reduced affinity for gdp, corresponds to the g5 loop of human gnai1, a slow gdp- releasing protein, in construct of residues 1-270."\', \'/note="s->a: dramatically reduced gdp release-rate, 5-fold increase in affinity for gdp, in construct of residues 1- 270. gtp hydrolysis rate 1.5-fold higher than wild-type."\']', u'[\'/note="t->a: gtp hydrolysis rate…
1742	MUTAGEN	1	r->a,c	9	[u'[\'/note="r->a,c: lack of activity."\']']
1743	MUTAGEN	3	s->a,t	9	[u'[\'/note="s->a,t: decrease in atpase activity."\']', u'[\'/note="s->a,t: loss of phosphopantetheinylation, and inhibition of cell growth."\']', u'[\'/note="s->d,e: reduced affinity for isocitrate."\', \'/note="s->d: loss of enzyme activity."\', \'/note="s->a,t: decreased enzyme activity. loss of phosphorylation."\']']
1744	MUTAGEN	3	e->v	9	[u'[\'/note="e->v: indifferent."\']', u'[\'/note="e->v: 33% activity."\']', u'[\'/note="e->a: shows negligible enzymatic activity."\', \'/note="e->v: shows wild-type activity and substrate affinity."\']']
1745	MUTAGEN	5	m->t	9	[u'[\'/note="m->t: no protein should be translated, dna region still acts as an antitoxin to ralr."\']', u'[\'/note="m->t: not toxic in a disrupted ghos strain as no protein produced."\']', u'[\'/note="m->t: no longer inhibits cpx pathway, protein more susceptible to degp."\']', u'[\'/note="m->t: not toxic as no protein is produced."\']', u'[\'/note="m->t: triclosan resistance."\']']
1746	MUTAGEN	5	k->c	9	[u'[\'/note="k->c: shows 50% of the wild-type rate of deamino- nadh oxidase. inhibited by 30-50% upon addition of 0.25 mm of decylubiquinone."\']', u'[\'/note="k->c: shows 7% of the wild-type rate of deamino-nadh oxidase."\']', u'[\'/note="k->c: retains more than 50% of phosphotransferase activity."\']', u'[\'/note="k->c: reduced folding of ompt; when associated with c-430, traps protein in later…
1747	MUTAGEN	1	lev->aea	9	[u'[\'/note="lev->aea: disrupts interaction with hypa. can only partially restore hydrogenase production in a hypb deletion mutant."\']']
1748	MUTAGEN	1	ekvlirqed->kkvlirqen	9	[u'[\'/note="ekvlirqed->kkvlirqen: in rnla5; strongly reduces rnase ls activity."\']']
1749	MUTAGEN	3	y->n	9	[u'[\'/note="y->n: improves chromate reductase activity compared to the wild-type enzyme."\']', u'[\'/note="y->n: improves chromate reductase activity compared to the wild-type enzyme. increase of the affinity binding and catalytic efficiency for both chromate and uranyl."\']', u'[\'/note="y->n: no change in activity."\']']		but is easily removed by a salt wash.""\'	\'/note=""missing: incorporates into ribosomes in vivo.""\'	\'/note=""a->s	t	v: abolishes translation elongation arrest of secm.""\']'	u'[\'/note=""missing: complete loss of enzyme activity. no effect on penicillin binding.""\']'	u'[\'/note=""missing: decreased growth rate at all temperatures. decreased affinity of the 30s subunit p site for trna in vitro.""\']'	u'[\'/note=""missing: complete loss of activity.""\']'	u'[\'/note=""missing: decreases growth at 18 degrees celsius	does not suppress bipa deletion in cold	stronger association with ribosomes.""\']'	u'[\'/note=""missing: reduces dna binding 2-fold	no change in atp hydrolysis	has a high level of transposon excision. no growth change at 37 or 18 degrees celsius	does not suppress bipa deletion in cold	stronger association with ribosomes.""\']'	u'[\'/note=""missing: no longer complements a deletion mutant	has no dominant-negative effects on wild-type protein	does not oligomerize.""\'	\'/note=""missing: no longer complements a deletion mutant	has dominant-negative effects on wild-type protein	oligomerizes.""\']'	u'[\'/note=""k->p: no effect on oligomerization of n-terminal fragment 1-89.""\'	\'/note=""missing: no longer complements a deletion mutant	has no dominant-negative effects on wild-type protein	does not oligomerize.""\'	\'/note=""missing: no longer complements a deletion mutant	has dominant-negative effects on wild-type protein	oligomerizes.""\']'	u'[\'/note=""r->h: derepression of prov and bgl expression	normal dna-binding	normal oligomerization. fragments 1-46 and 1-64 no longer bind hha.""\'	\'/note=""r->c: derepression of prov and bgl expression	normal dna-binding	normal oligomerization.""\'	\'/note=""missing: no longer complements a deletion mutant	has no dominant-negative effects on wild-type protein	does not oligomerize.""\'	\'/note=""rtlr->erla: decreased dna-binding	loss of preference for curved dna.""\'	\'/note=""r->k: abolishes the interaction with hha.""\'	\'/note=""missing: no longer complements a deletion mutant	has dominant-negative effects on wild-type protein
1750	MUTAGEN	2	n->w	9	[u'[\'/note="n->w: decreases binding to ycgr, significantly improves motility in a pdeh disruption mutant."\']', u'[\'/note="n->w: significant suppression of the pdeh disruption motility phenotype, less binding to flig."\']']
1751	MUTAGEN	5	h->a,g	9	[u'[\'/note="h->a,g: loss of heme binding."\']', u'[\'/note="h->a,g: no loss of heme binding."\']', u'[\'/note="h->n: loss of activity with pnpp as substrate."\', \'/note="h->a,g: loss of activity with phytate as substrate."\']', u'[\'/note="h->a,g: loss of rna cyclase activity and rtca adenylation."\']', u'[\'/note="h->a,g: abolishes enzyme activity."\']']
1752	MUTAGEN	1	p->s,t	8	[u'[\'/note="p->s,t: resistant to antibiotics salinamide a and b."\']']
1753	MUTAGEN	1	d->a,g	8	[u'[\'/note="d->a,g: resistant to antibiotics salinamide a and b."\']']
1754	MUTAGEN	1	p->w	8	[u'[\'/note="p->w: decreases binding to ycgr, significantly improves motility in a pdeh disruption mutant."\']']
1755	MUTAGEN	1	q->w	8	[u'[\'/note="q->w: decreases binding to ycgr, significantly improves motility in a pdeh disruption mutant."\']']
1756	MUTAGEN	1	g->a,c	8	[u'[\'/note="g->a,c: resistant to antibiotics salinamide a and b."\']']
1757	MUTAGEN	1	rkpr->akpa	8	[u'[\'/note="rkpr->akpa: decreases mrna unwinding ability of the ribosome."\']']
1758	MUTAGEN	1	y->a,f	8	[u'[\'/note="y->a,f: reduces activity 1000-fold."\']']
1759	MUTAGEN	1	ctrrcpfc->atrrapfa	8	[u'[\'/note="ctrrcpfc->atrrapfa: loss of 1 4fe-4s cluster binding. loss of activity."\']']
1760	MUTAGEN	1	pl->fw	8	[u'[\'/note="pl->fw: no detectable water or glycerol permeability."\']']
1761	MUTAGEN	4	c->g	8	[u'[\'/note="c->g: little effect on the activity."\']', u'[\'/note="c->g: eliminates the activity."\']', u'[\'/note="c->g: 150-fold decrease in posttransfer editing activity against alanine, without change neither in pretransfer editing nor in aminoacylation."\']', u'[\'/note="c->g: loss of activity."\']']
1762	MUTAGEN	1	qqqqvqeq->aaaavaea	8	[u'[\'/note="qqqqvqeq->aaaavaea: rsea is degraded by rsep in the absence of degs."\']']
1763	MUTAGEN	1	s->l,r	8	[u'[\'/note="s->l,r: 100-fold derepression of operon, loss of dna-binding, still binds rele."\']']
1764	MUTAGEN	3	t->c	8	[u'[\'/note="t->c: no effect."\']', u'[\'/note="t->c: loss of transcription activation, loss of dna- binding, about 10% phosphorylation in vitro."\']', u'[\'/note="t->c: still binds substrate, with lower affinity. resistance to toxicants is abolished."\']']
1765	MUTAGEN	1	caleckfc->aaleakfa	8	[u'[\'/note="caleckfc->aaleakfa: loss of iron-sulfur cluster binding. no methylation of cys-355."\']']
1766	MUTAGEN	3	e->l	8	[u'[\'/note="e->l: 51% of wild-type specific activity."\']', u'[\'/note="e->l: little effect on the overall structure; when associated with m-142."\']', u'[\'/note="e->l: very minor growth defect. lethal; when associated with l-435."\']']
1767	MUTAGEN	2	e->p	8	[u'[\'/note="missing: in poxb6. inactive in vivo, does not complement inactive mutants. active in vitro, no longer activated by nor binds to, detergents."\', \'/note="missing: in poxb7 inactive in vivo, reduced activity in vitro."\', \'/note="e->p: in poxb16; loss of activity, weakly activated by cleavage."\']', u'[\'/note="e->k: strongly reduced enzyme activity. increases stability of covalent r…
1768	MUTAGEN	1	d->w	8	[u'[\'/note="d->w: slightly improves motility in a pdeh disruption mutant."\']']
1769	MUTAGEN	2	l->e	8	[u'[\'/note="l->e: obviates binding to ycgr."\']', u'[\'/note="l->e: prevents localization to the z ring. lack of activity."\']']
1770	MUTAGEN	3	l->v	8	[u'[\'/note="l->v: no change in transport activity."\']', u'[\'/note="l->v: acquires ability to transport lactic acid."\']', u'[\'/note="l->v: resistant to irap, irad and iram."\']']
1771	MUTAGEN	1	cvqkcpyc->svqkspys	8	[u'[\'/note="cvqkcpyc->svqkspys: loss of [4fe-4s] cofactor, protein does not dimerize, binds heme, does not transfer heme to narghi."\']']
1772	MUTAGEN	3	cksmvrmc->apa	8	[u'[\'/note="cksmvrmc->apa: loss of repressor activity. loss of dna binding. reduces assembly into functionally active tetramers."\']', u'[\'/note="m->a: no effect on repressor activity. loss of glyoxylate-triggered dissociation from dna."\', \'/note="cksmvrmc->apa: loss of repressor activity. loss of dna binding. reduces assembly into functionally active tetramers."\']', u'[\'/note="cksmvrmc->ap…
1773	MUTAGEN	1	cc->aa	8	[u'[\'/note="cc->aa: reduces nickel-binding capacity."\']']
1774	MUTAGEN	5	l->s	8	[u'[\'/note="l->s: cuts rsea without previous degs cleavage."\']', u'[\'/note="l->s: loss of function."\']', u'[\'/note="l->s: lack of activity."\']', u'[\'/note="l->s: loss of ability to interact with rssb."\']', u'[\'/note="l->s: loss of localization to the cell pole. fails to oligomerize."\']']
1775	MUTAGEN	1	f->c	8	[u'[\'/note="f->c: resistant to antibiotics salinamide a and b."\']']
1776	MUTAGEN	1	eqdk->iegr	8	[u'[\'/note="eqdk->iegr: cold-sensitive at 30 degrees celsius; when associated with 334-w--g-338. protein accumulates stably."\']']
1777	MUTAGEN	1	cskc->ssks	8	[u'[\'/note="cskc->ssks: binds zn(2+) normally."\']']
1778	MUTAGEN	1	r->c,h,p,s	8	[u'[\'/note="r->c,h,p,s: resistant to antibiotics salinamide a and b."\']']
1779	MUTAGEN	3	w->y	7	[u'[\'/note="w->y: no change in activity."\']', u'[\'/note="w->l: the enzyme is activated only 3-fold by fructose-1,6-bisphosphate."\', \'/note="w->a: insensitive to activation by fructose-1,6- bisphosphate, but still binds fructose-1,6-bisphosphate, with similar affinity as the wild-type. amp causes similar inhibition on the wild-type and mutant."\', \'/note="w->y: the enzyme is activated 15-fol…
1780	MUTAGEN	2	i->f	7	[u'[\'/note="i->f: loss of activity. decreases interaction with envz."\']', u'[\'/note="i->f: in fira201; confers temperature sensitivity."\']']
1781	MUTAGEN	3	a->l	7	[u'[\'/note="a->l: produces shorter polymers."\']', u'[\'/note="a->q: impairs interaction with napd. decrease in nitrate reductase activity. defect in tat transport."\', \'/note="a->l: impairs interaction with napd."\']', u'[\'/note="a->l: 93% decrease in activity."\']']
1782	MUTAGEN	1	v->d,k	7	[u'[\'/note="v->c,g,n: no detectable phenotype."\', \'/note="v->d,k: normal growth stops, without cell death, due to increased membrane permeability to potassium ions and protons (permeability tested only for d substitutions)."\']']
1783	MUTAGEN	5	t->p	7	[u'[\'/note="t->p: affects activity."\']', u'[\'/note="t->p: produces mischarged thr-trna(val) and cys- trna(val)."\']', u'[\'/note="t->p: decrease in activity; no effect on dna- binding."\']', u'[\'/note="t->p: in cpxa101; a cpxa gain of function mutant, decreased autophosphorylation, decreased phosphotransfer to cpxr, loss of phosphatase activity, responds to periplasmic protein overproduction.…
1784	MUTAGEN	1	t->a,c	7	[u'[\'/note="t->a,c: impairs atpase activity."\']']
1785	MUTAGEN	2	g->c,s	7	[u'[\'/note="g->a: 2-fold increase in susceptibility to macrolides. does not stimulate macb atpase activity."\', \'/note="g->c,s: does not affect susceptibility to macrolides."\']', u'[\'/note="g->c,s: no growth on maltose."\']']
1786	MUTAGEN	5	s->p	7	[u'[\'/note="s->f: becomes sensitive to phages k3, k4, k5, k3h1, tuii*-26, ox2, ox4, ox5, ox2h5, ox2h20, partially sensitive to phages tuii*-46, m1."\', \'/note="s->p: becomes sensitive to phages k3, k4, k5, k3h1, tuii*-26, ox2h5, ox2h20."\']', u'[\'/note="s->p: severe growth defect at 42 degrees celsius. decreased levels of some ribosomal proteins, altered ptms of others."\']', u'[\'/note="s->p:…
1787	MUTAGEN	3	s->q	7	[u'[\'/note="s->q: loss of enzyme activity."\']', u'[\'/note="s->q: almost no change in activity."\']', u'[\'/note="s->a: loss of aldolase activity; when associated with l-29."\', \'/note="s->q: loss of aldolase activity."\']']
1788	MUTAGEN	4	v->e	7	[u'[\'/note="v->e: increased transcription of the region ii transcript."\']', u'[\'/note="v->e: severely impairs the interaction the interaction with chey-p."\']', u'[\'/note="v->e: large decrease in recombination, loss of chi hotspot activity, decreased recb helicase rate, retains nuclease activity but not chi-sequence specificity, does not load reca."\']', u'[\'/note="v->a: retains amia and ami…
1789	MUTAGEN	1	d->n,t	7	[u'[\'/note="d->n,t: loss of activity."\']']
1790	MUTAGEN	3	e->c	7	[u'[\'/note="e->a,d,q: loss of activity."\', \'/note="e->c: 50% of wild-type specific activity."\']', u'[\'/note="e->d: still binds substrate. no transport activity in the presence of a proton gradient, but still transports substrate in the absence of a proton gradient. resistance to toxicants is abolished."\', \'/note="e->c: no substrate binding. no transport activity. resistance to toxicants is…
1791	MUTAGEN	4	eddddae->qnnnnaq	7	[u'[\'/note="eddddae->qnnnnaq: unable to bind divalent cations in vitro and impaired in the ability to respond to mg(2+) deprivation in vivo."\']', u'[\'/note="d->a: wild-type effect concerning mgrb transcription."\', \'/note="eddddae->qnnnnaq: unable to bind divalent cations in vitro and impaired in the ability to respond to mg(2+) deprivation in vivo."\']', u'[\'/note="d->i: wild-type effect co…
1792	MUTAGEN	3	r->c,h	7	[u'[\'/note="r->c,h: complete loss of motility."\']', u'[\'/note="r->c,h: impairs septal localization."\']', u'[\'/note="r->c,h: impairs recruitment of ftsn to the septal ring."\']']
1793	MUTAGEN	3	f->e	7	[u'[\'/note="f->e: the affinity for ente and catalytic efficiency of the s-dihydroxybenzoyltransferase ente are below that of the wild-type."\']', u'[\'/note="f->e: loss of ability to bind lipoproteins."\']', u'[\'/note="f->e: does not affect localization or function."\']']
1794	MUTAGEN	3	n->s	7	[u'[\'/note="n->s: shows activity significantly greater than wild-type."\']', u'[\'/note="n->s: in pbpbr1; obtained after selection for increased resistance to cephalexin, causes a change in the shape of the cell: the polar caps are pointed."\']', u'[\'/note="n->s: confers sensitivity to cold; overexpression does not suppress an rbfa disruption."\']']
1795	MUTAGEN	3	h->c	7	[u'[\'/note="h->c: abolishes catalytic activity."\']', u'[\'/note="h->c: loss of phosphotransferase activity. unable to dimerize."\', \'/note="h->e: results in the formation of a single complex corresponding to the productive phosphoryl transfer complex."\']', u'[\'/note="h->c: loss of phosphotransferase activity."\']']
1796	MUTAGEN	2	rdctgkr->gdctgkg	7	[u'[\'/note="rdctgkr->gdctgkg: slight reduction in 50s subunit binding."\']', u'[\'/note="rdctgkr->gdctgkg: slight reduction in 50s subunit binding."\', \'/note="g->e: temperature-sensitive for growth at 42 degrees celsius, defects in chromosome partitioning; when associated with n-85."\']']
1797	MUTAGEN	3	p->d	6	[u'[\'/note="p->d: in umud1; non-cleavable."\']', u'[\'/note="p->d: does not affect oligomerization."\']', u'[\'/note="p->d: 60-fold reduction of the catalytic rate, and large decrease in uracil-binding affinity."\']']
1798	MUTAGEN	4	n->q	6	[u'[\'/note="n->c,g,l: decreased substrate binding, retains some proteolytic activity."\', \'/note="n->q: no effect."\']', u'[\'/note="n->q: increases km for n-acetyl-l-glutamate over 1000-fold. increases km for atp over 20-fold."\']', u'[\'/note="n->c,d,t: strong decrease in activity."\', \'/note="n->s: increase of activity."\', \'/note="n->a: highly active."\', \'/note="n->q: loss of activity."…
1799	MUTAGEN	2	fev->aaa	6	[u'[\'/note="fev->aaa: no effect on trigger factor binding."\']', u'[\'/note="e->k: no effect on trigger factor binding."\', \'/note="fev->aaa: no effect on trigger factor binding."\']']
1800	MUTAGEN	1	ivq->lvr	6	[u'[\'/note="ivq->lvr: does not confer c-di-gmp phosphodiesterase activity."\']']
1801	MUTAGEN	3	de->aa	6	[u'[\'/note="de->aa: loss of function. still interacts with rnap."\']', u'[\'/note="de->aa: fails to localize to the midcell when exposed to osmotic upshift."\']', u'[\'/note="de->aa: no c-di-gmp produced in an overexpressing strain."\']']
1802	MUTAGEN	2	e->a,l	6	[u'[\'/note="e->d,q: small increase of the catalytic efficiency, when the sodium concentration increases."\', \'/note="e->a,l: the catalytic efficiency is not increased, when the sodium concentration increases."\']', u'[\'/note="e->a,l: drastic decrease in activity."\']']
1803	MUTAGEN	2	vse->aaa	6	[u'[\'/note="vse->aaa: strongly reduces trigger factor binding."\']', u'[\'/note="vse->aaa: strongly reduces trigger factor binding."\', \'/note="e->q: strongly reduces trigger factor binding."\', \'/note="e->a: binds normally to ribosomes; strongly reduces trigger factor binding."\']']
1804	MUTAGEN	1	l->m,w	6	[u'[\'/note="l->g,d,r: loss of activity."\', \'/note="l->m,w: no effect."\']']
1805	MUTAGEN	1	kir->aia	6	[u'[\'/note="kir->aia: very little in vivo spacer acquisition."\']']
1806	MUTAGEN	3	c->y	6	[u'[\'/note="c->a: no effect."\', \'/note="c->y: no activity."\']', u'[\'/note="c->y: in rada100; rich medium-grown cells are sensitive to gamma, x-ray and uv radiation as well as methyl methanesulfonate and hydroxyurea, impaired in repair of dsdna breaks. decreased resistance to ciprofloxacin (cfx)."\']', u'[\'/note="c->y: shows 0.2% of wild-type catalytic activity, but substrate affinity is not…
1807	MUTAGEN	2	adm->ldl	6	[u'[\'/note="qadmf->padmp: loss of interaction with beta sliding clamp (dnan)."\', \'/note="adm->ldl: increases binding to beta sliding clamp (dnan), increases stability of enzyme complex."\']', u'[\'/note="qadmf->padmp: loss of interaction with beta sliding clamp (dnan)."\', \'/note="adm->ldl: increases binding to beta sliding clamp (dnan), increases stability of enzyme complex."\', \'/note="mf-…
1808	MUTAGEN	1	wpftgt->apfaga	6	[u'[\'/note="wpftgt->apfaga: periplasmic loop 4, nearly wild-type transfer of cu(+) to cusf."\']']
1809	MUTAGEN	2	p->pdp	6	[u'[\'/note="p->pdp: in lamb147; decreased affinity for maltose, grows on maltodextrins, no change in phage lambda binding."\']', u'[\'/note="p->pdp: in lamb146; loss of starch binding, grows poorly on maltodextrins, reduced affinity for somaltose."\']']
1810	MUTAGEN	1	pis->r	6	[u'[\'/note="pis->r: affects interaction with lptd and lptd biogenesis. increases outer membrane permeability."\']']
1811	MUTAGEN	1	avkril->vtvtvt	6	[u'[\'/note="avkril->vtvtvt: does not inhibit translation."\']']
1812	MUTAGEN	2	w->g	6	[u'[\'/note="w->g: 10-fold and 20-fold decrease in catalytic activity and affinity, respectively."\']', u'[\'/note="w->g: normal maltose transport but constitutive mal gene expression."\']']
1813	MUTAGEN	1	t->f	6	[u'[\'/note="t->f: complete loss of trna editing; when associated with w-587 and f-666."\']']
1814	MUTAGEN	3	t->k	6	[u'[\'/note="t->v: little stereoselectivity, accepting kdpg and kdpgal as substrate with roughly equal efficacy. it strongly diminishes the activity against kdpg and slightly increases activity against kdpgal."\', \'/note="t->k: shows activity significantly greater than wild-type. shows a markedly altered substrate specificity relative to the wild-type, with an enhanced activity against pyridine …
1815	MUTAGEN	2	kvk->pvp	6	[u'[\'/note="vykvk->pykvp: lethal, wild-type protein levels."\', \'/note="kvk->pvp: lethal, wild-type protein levels."\', \'/note="vyk->pyp: lethal, wild-type protein levels."\']', u'[\'/note="vykvk->pykvp: lethal, wild-type protein levels."\', \'/note="kvk->pvp: lethal, wild-type protein levels."\']']
1816	MUTAGEN	1	gg->aa	6	[u'[\'/note="gg->aa: cells overexpressing this mutant are no longer swimming suppressed."\']']
1817	MUTAGEN	1	e->n	6	[u'[\'/note="e->n: 50-fold decrease in catalytic efficiency and 6-fold decrease of binding affinity."\']']
1818	MUTAGEN	2	e->t	6	[u'[\'/note="e->t: 2-fold increase in rpos half-life. does not affect interaction with rssb."\']', u'[\'/note="e->t: improves chromate reductase activity compared to the wild-type enzyme."\']']
1819	MUTAGEN	1	d->f	6	[u'[\'/note="d->e: 4-fold decrease in the affinity binding for rib-5-p in the presence of magnesium ions. in the presence of cobalt ions, it shows a 15-fold decrease in the affinity binding for rib-5-p."\', \'/note="d->f: with magnesium or manganese ions, the affinity binding values for atp and rib-5-p are comparable to those of the wild-type."\']']
1820	MUTAGEN	4	lslgvs->gslgvg	6	[u'[\'/note="lslgvs->gslgvg: no longer hydroxybutyrated."\']', u'[\'/note="s->g: protein is hydroxybutyrated. reconstituted pores have lower conductance and are open for less time. no longer hydroxybutyrated, unable to form pores; when associated with g-188."\', \'/note="slgv->glgs: no longer hydroxybutyrated."\', \'/note="lslgvs->gslgvg: no longer hydroxybutyrated."\']', u'[\'/note="lgvs->ggvg: …
1821	MUTAGEN	3	rlr->ala	6	[u'[\'/note="r->a: slight decrease in spacer acquisition."\', \'/note="rlr->ala: no in vivspacer acquisition, significantly decreased protospacer binding."\']', u'[\'/note="rlr->ala: no in vivspacer acquisition, significantly decreased protospacer binding."\']', u'[\'/note="r->a: slight decrease in spacer acquisition."\', \'/note="rlr->ala: no in vivspacer acquisition, significantly decreased pro…
1822	MUTAGEN	4	l->h	6	[u'[\'/note="l->h: impairs both localization and function, and reduces the efficiency of dimerization."\']', u'[\'/note="l->h: protein is not incorporated into ribosomes."\']', u'[\'/note="l->h: loss of regulation by o(2)."\']', u'[\'/note="l->h: resistant to irap and irad."\']']
1823	MUTAGEN	2	vyk->pyp	6	[u'[\'/note="vykvk->pykvp: lethal, wild-type protein levels."\', \'/note="vyk->pyp: lethal, wild-type protein levels."\']', u'[\'/note="vykvk->pykvp: lethal, wild-type protein levels."\', \'/note="kvk->pvp: lethal, wild-type protein levels."\', \'/note="vyk->pyp: lethal, wild-type protein levels."\']']
1824	MUTAGEN	1	c->g,s	6	[u'[\'/note="c->g,s: does not affect the kinetics of atp hydrolysis and inhibition by bicyclomycin."\']']
1825	MUTAGEN	2	kr->aa	6	[u'[\'/note="kr->aa: lack of activity. low-level streptomycin resistance."\']', u'[\'/note="kr->aa: no effect."\']']
1826	MUTAGEN	2	kir->pip	6	[u'[\'/note="kir->pip: lethal, wild-type protein levels."\', \'/note="k->p: reduces cell growth, wild-type protein levels."\']', u'[\'/note="kir->pip: lethal, wild-type protein levels."\']']
1827	MUTAGEN	1	n->e	6	[u'[\'/note="n->e: decreases binding to ycgr."\']']
1828	MUTAGEN	4	egstfy->rshtva	6	[u'[\'/note="e->r: 2-fold increase in kd for fad. retains 15% of specific activity."\', \'/note="egs->rsh: loss of activity. has largely lost both fad and ligand-binding properties."\', \'/note="egstfy->rshtva: loss of activity. has largely lost both fad and ligand-binding properties."\']', u'[\'/note="egs->rsh: loss of activity. has largely lost both fad and ligand-binding properties."\', \'/not…
1829	MUTAGEN	1	dee->aaa	6	[u'[\'/note="dee->aaa: 80% reduction in activation of class ii promoters; 95% loss when associated with a-59."\']']
1830	MUTAGEN	1	ppp->aaa	6	[u'[\'/note="ppp->aaa: decreased protein homodimerization, constitutive ompc, little to no ompf with or without salt, no interaction with mzra."\']']
1831	MUTAGEN	2	pppip->aaais	5	[u'[\'/note="pppip->aaais: significantly reduced dependence on ef-p for translation, increased levels of protein in an efp-strain."\']', u'[\'/note="pppip->aaais: significantly reduced dependence on ef-p for translation, increased levels of protein in an efp-strain."\', \'/note="p->a: reduced dependence on ef-p for translation, increased levels of protein in an efp- strain."\']']
1832	MUTAGEN	1	kyipk->eyipe	5	[u'[\'/note="kyipk->eyipe: almost abolishes 50s subunit binding."\']']
1833	MUTAGEN	2	q->n	5	[u'[\'/note="q->n: reduces quinol oxidase activity by 75%, decreased affinity for ubiquinol-1."\']', u'[\'/note="q->a: almost loss of activity with benzoyl-coa as substrate."\', \'/note="q->n: 51-fold decrease in catalytic efficiency toward benzoyl-coa."\']']
1834	MUTAGEN	1	wpqwf->apqaa	5	[u'[\'/note="wpqwf->apqaa: first half of periplasmic loop 2, nearly wild-type transfer of cu(+) to cusf."\']']
1835	MUTAGEN	2	p->v	5	[u'[\'/note="p->v: increased sensitivity to hu upon overexpression, supports normal growth, no effect in mazef/relbe or tonb deletions. no effect on persister cell formation upon overexpression."\']', u'[\'/note="p->v: loss of activity."\']']
1836	MUTAGEN	3	i->c	5	[u'[\'/note="i->c: highly active."\']', u'[\'/note="i->c: still binds substrate, with lower affinity. resistance to toxicants is abolished."\']', u'[\'/note="i->c: reduced folding of ompt; when associated with c-808, traps protein in lateral closed conformation, growth restored by reducing agent."\']']
1837	MUTAGEN	2	n->t	5	[u'[\'/note="n->t: loss of activity."\']', u'[\'/note="n->h: 15-fold increase in catalytic efficiency with l-lactaldehyde as substrate. shows expanded substrate specificity."\', \'/note="n->e: 4-fold increase in catalytic efficiency with l-lactaldehyde as substrate. shows expanded substrate specificity."\', \'/note="n->t: 6-fold increase in catalytic efficiency with l-lactaldehyde as substrate. s…
1838	MUTAGEN	3	c->s,a	5	[u'[\'/note="c->s,a: does not inactivate enzyme."\']', u'[\'/note="c->s,a: slight inhibition of enzymatic activity."\']', u'[\'/note="c->s,a: no activation following redox signaling."\']']
1839	MUTAGEN	1	mearh->aaara	5	[u'[\'/note="mearh->aaara: second half of periplasmic loop 2, wild-type transfer of cu(+) to cusf."\']']
1840	MUTAGEN	4	q->k	5	[u'[\'/note="q->a: no longer increases recombination efficiency or sos response, more toxic than wild-type."\', \'/note="q->k: no longer increases recombination efficiency, toxicity or sos response."\']', u'[\'/note="q->k: eliminates septal localization."\']', u'[\'/note="q->a: increases constitutive potassium efflux and reduces glutathione-mediated inhibition of potassium efflux."\', \'/note="q-…
1841	MUTAGEN	2	n->l	5	[u'[\'/note="n->l: no significant effect (with or without mgcl(2) or cacl(2))."\']', u'[\'/note="n->q: strong decrease of the aldolase activity mostly due to a decrease of the affinity for l-fuculose 1- phosphate (fuc1p)."\', \'/note="n->l: loss of aldolase activity; when associated with a-71."\']']
1842	MUTAGEN	1	tadnr->aaana	5	[u'[\'/note="tadnr->aaana: second half of periplasmic loop 1, wild-type transfer of cu(+) to cusf."\']']
1843	MUTAGEN	1	i->f,y	5	[u'[\'/note="i->f,y: decreases the duration of the open state of the channel and decreases mechanosensitivity."\']']
1844	MUTAGEN	1	rwadd->aaada	5	[u'[\'/note="rwadd->aaada: 90% reduction in levels of yebf secretion."\']']
1845	MUTAGEN	2	i->d	5	[u'[\'/note="i->g,n: decreased protein stability, wild-type degradation of pape."\', \'/note="i->d: decreased protein stability, significantly reduced degradation of pape."\']', u'[\'/note="i->d: it decreases vmax to about 10% of the wild- type value and the affinity for substrate is increased about two- to fourfold. this mutation decreases the catalytic activity in a manner that is analogous to …
1846	MUTAGEN	3	y->f,s	5	[u'[\'/note="y->f,s: loss of all excisionase activity."\']', u'[\'/note="y->f,s: slight changes in activity."\']', u'[\'/note="missing: no dimerization of residues 15-393, fragment has no atpase activity."\', \'/note="y->f,s: 5- to 10-fold reduced dimerization of residues 2-393, fragment has 3- to 5-fold reduced atpase activity. fragment dimerizes upon crystallization."\']']
1847	MUTAGEN	2	r->a,s	5	[u'[\'/note="r->a,s: severe loss of enzymatic activity."\']', u'[\'/note="r->a,s: shows a decrease in activation of expression of either mtr or tyrp. does not affect repression of arof."\']']
1848	MUTAGEN	3	l->t	5	[u'[\'/note="l->t: increases auto-oxidation."\', \'/note="l->f: alters o(2) binding, increases auto- oxidation."\']', u'[\'/note="l->f: significantly reduces heme-binding affinity; increases auto-oxidation."\', \'/note="l->t: increases auto-oxidation."\']', u'[\'/note="l->t: almost no change in activity."\']']
1849	MUTAGEN	2	y->w	5	[u'[\'/note="y->f: reduced kcat by 90%."\', \'/note="y->w: reduced activity by 95%. reduced affinity for both substrates. exists as a mixture of monomer, dimer and tetramer in solution. has significantly lower thermal stability than the wild-type enzyme."\']', u'[\'/note="y->w: impairs chemotaxis; when associated with i- 87."\']']
1850	MUTAGEN	2	f->t	5	[u'[\'/note="f->t: reduced dna-binding."\']', u'[\'/note="f->t: can bind and use nadp(+) as coenzyme. 16-fold increase in catalytic efficiency with nad(+) as coenzyme."\']']
1851	MUTAGEN	3	lslpl->asapa	5	[u'[\'/note="lslpl->asapa: decreased binding to beta clamp."\']', u'[\'/note="lp->aa: decreased binding to beta clamp."\', \'/note="lslpl->asapa: decreased binding to beta clamp."\', \'/note="l->a: impaired in beta clamp binding and dnaa-atp hydrolysis, very poor growth at 30 degrees celsius."\']', u'[\'/note="lp->aa: decreased binding to beta clamp."\', \'/note="lslpl->asapa: decreased binding t…
1852	MUTAGEN	2	r->h,l	5	[u'[\'/note="r->h,l: inactivates enzyme."\']', u'[\'/note="r->h,l: loss of activity."\']']
1853	MUTAGEN	2	g->f	5	[u'[\'/note="g->f: strong decrease in methionine efflux."\']', u'[\'/note="g->f: absence of both enoyl-coa hydratase and 3- hydroxyacyl-coa epimerase activities. delta(3)-cis- delta(2)-trans-enoyl-coa isomerase is only slightly affected."\']']
1854	MUTAGEN	4	h->g	5	[u'[\'/note="h->a: loss of crispr immunity to lambda dna and of crispr-mediated plasmid curing."\', \'/note="h->g: 75% r-loop formation."\']', u'[\'/note="h->g: loss of catalytic activity."\']', u'[\'/note="h->g: abolishes enzymatic activity."\']', u'[\'/note="h->n: 180-fold decrease in catalytic efficiency."\', \'/note="h->q: 50-fold decrease in catalytic efficiency."\', \'/note="h->f: 2-fold de…
1855	MUTAGEN	4	heagh->keagk	5	[u'[\'/note="heagh->keagk: loss of protease function."\', \'/note="h->y: loss of protease function."\']', u'[\'/note="heagh->keagk: loss of protease function."\', \'/note="e->q: loss of protease activity in vivo."\']', u'[\'/note="heagh->keagk: loss of protease function."\']', u'[\'/note="h->y: in tolz21; loss of protease function in vivo, retains about 25% atpase activity, temperature sensitive.…
1856	MUTAGEN	1	sq->aa	4	[u'[\'/note="sq->aa: no effect."\']']
1857	MUTAGEN	3	d->a,e	4	[u'[\'/note="d->a,e: lack of 3hpp transport activity."\']', u'[\'/note="d->a,e: converts the protein into an enzyme with dual specificity, i.e. that is able to use both nadph and nadh as cosubstrates."\']', u'[\'/note="d->a,e: loss of activity."\']']
1858	MUTAGEN	2	d->a,c	4	[u'[\'/note="d->a,c: lack of activity."\']', u'[\'/note="d->a,c: 6-fold decrease in cys-trna(pro) deacylation activity."\']']
1859	MUTAGEN	1	q->v,a	4	[u'[\'/note="q->v,a: 12- and 2-fold increase of the reductoisomerase activity with nadh and nadph, respectively."\']']
1860	MUTAGEN	2	a->r	4	[u'[\'/note="a->h: reduced activity."\', \'/note="a->r: completely defective."\']', u'[\'/note="a->r: 7% of wild-type rf1 methylation activity. strongly reduced affinity for s-adenosyl-l-methionine."\']']
1861	MUTAGEN	3	a->h	4	[u'[\'/note="a->h: little effect on the kinetic properties."\']', u'[\'/note="a->h: 30% increase in 3hpp transport activity."\']', u'[\'/note="a->h: causes large decrease in affinity for both thf and dhp."\']']
1862	MUTAGEN	2	kt->qr	4	[u'[\'/note="kt->qr: loss of activity."\', \'/note="k->q: loss of activity."\']', u'[\'/note="kt->qr: loss of activity."\']']
1863	MUTAGEN	1	e->a,g,q,s,t	4	[u'[\'/note="e->k,r: decreased proton and chloride transport."\', \'/note="e->c,i,l,v: abolishes proton and chloride transport."\', \'/note="e->d,h: no effect on proton and chloride transport."\', \'/note="e->a,g,q,s,t: abolishes proton transport, and reduces chloride transport."\']']
1864	MUTAGEN	3	g->d,v	4	[u'[\'/note="g->a: reduces nick joining activity by 50%."\', \'/note="g->d,v: reduces nick joining activity by 95%."\']', u'[\'/note="g->d,v: reduces nick joining activity by 95%."\']', u'[\'/note="g->a: reduces nick joining activity by 95%."\', \'/note="g->d,v: loss of nick joining activity."\']']
1865	MUTAGEN	2	k->s,t	4	[u'[\'/note="missing: protein is no longer biotinylated on the cell surface."\', \'/note="k->s,t: does not affect the formation of murein- bound lipoprotein."\']', u'[\'/note="k->s,t: 75% methylase activity, binds sam normally."\']']
1866	MUTAGEN	2	g->a,s	4	[u'[\'/note="g->a,s: decrease in k(+) affinity and loss of cation selectivity."\']', u'[\'/note="g->a,s: loss of activity."\']']
1867	MUTAGEN	1	t->a,v	4	[u'[\'/note="t->a,v: loss of enzyme activity."\']']
1868	MUTAGEN	1	cghc->sghs	4	[u'[\'/note="missing: partial resistance to cuso(4), forms phosphate intermediate."\', \'/note="missing: slight increase in cuso(4)-stimulation of atpase, no growth in cuso(4). grows when this protein fragment is provided in trans or if b.subtilis copz is present."\', \'/note="missing: loss of growth in the presence of cuso(4), loss of cu efflux."\', \'/note="missing: no resistance to cuso(4), do…
1869	MUTAGEN	1	y->a,q	4	[u'[\'/note="y->a,q: abolished denadding activity without disrupting homodimerization."\']']
1870	MUTAGEN	1	r->n	4	[u'[\'/note="r->n: recognizes an operator variant."\']']
1871	MUTAGEN	2	r->w	4	[u'[\'/note="r->w: complete loss of motility."\']', u'[\'/note="r->w: increased expression of periplasmic chaperone spy."\']']
1872	MUTAGEN	2	r->v	4	[u'[\'/note="r->v: reduces first-order rate constant over 25000- fold."\']', u'[\'/note="r->v: 17% of wild-type activity."\']']
1873	MUTAGEN	1	e->q,a	4	[u'[\'/note="e->q,a: large reduction in the amount of the metal cofactor bound to the enzyme."\']']
1874	MUTAGEN	1	p->a,s	4	[u'[\'/note="p->a,s: strongly reduces affinity for dnaa. reduces dnaa-dependent dna synthesis."\']']
1875	MUTAGEN	1	r->v,s	4	[u'[\'/note="r->v,s: loss of function."\']']
1876	MUTAGEN	3	s->e	4	[u'[\'/note="s->c: loss of binding to perrhenate. slightly reduced chromate removal from a buffered solution."\', \'/note="s->a: loss of chromate removal from a buffered solution; when associated with a-63."\', \'/note="s->d: loss of binding to perrhenate. slightly reduced chromate removal from a buffered solution. significantly reduced chromate removal from a buffered solution; when associated w…
1877	MUTAGEN	2	s->r	4	[u'[\'/note="s->r: in prla401; altered signal sequence interaction, transient transmembrane channels open."\']', u'[\'/note="s->r: nearly complete loss of response to excess periplasmic protein."\']']
1878	MUTAGEN	1	h->e,f,k	4	[u'[\'/note="h->e,f,k: essentially inactive unless very rapid purification. causes very large destabilizations of the transition state."\']']
1879	MUTAGEN	1	h->e,f,n	4	[u'[\'/note="h->e,f,n: poorly reactive with galactosyl substrates. less stable to heat than wild-type."\']']
1880	MUTAGEN	1	td->aa	4	[u'[\'/note="td->aa: no effect."\']']
1881	MUTAGEN	1	re->aa	4	[u'[\'/note="re->aa: no effect."\']']
1882	MUTAGEN	1	l->y,d	4	[u'[\'/note="l->y,d: 1.4 to 2.5% of wild-type activity. decrease in affinity for pyruvate, but nearly no change in that for (s)-asa. exists as a dimer in solution."\']']
1883	MUTAGEN	1	kk->ee	4	[u'[\'/note="kk->aa: strongly reduces both binding to malonyl-acp and binding to substrate."\', \'/note="kk->ee: abolishes the binding to malonyl-acp but not that of the substrate."\']']
1884	MUTAGEN	2	c->h	4	[u'[\'/note="c->s: loss of function; when associated with s-161; s-164 and s-186."\', \'/note="c->h: no effect on chaperone function. same effect; when associated with h-161 or h-164."\']', u'[\'/note="c->s: loss of function; when associated with s-161; s-164 and s-184."\', \'/note="c->h: no effect on chaperone function."\']']
1885	MUTAGEN	1	dnmm->aaaa	4	[u'[\'/note="dnmm->aaaa: first half of periplasmic loop 1, transfers about 10% cu(+) to cusf."\']']
1886	MUTAGEN	1	c->a,g,v	4	[u'[\'/note="c->a,g,v: no significant activity."\']']
1887	MUTAGEN	1	v->l	4	[u'[\'/note="v->l: abolishes dna-binding, but remains associated with muke and mukf."\']']
1888	MUTAGEN	2	v->c	4	[u'[\'/note="v->c: wild-type transcription activation, decreased dna-binding, about 40% phosphorylation in vitro."\']', u'[\'/note="v->c: suppressor of eaa loop mutations in malfg."\']']
1889	MUTAGEN	2	ts->li	4	[u'[\'/note="ts->li: constitutively active at class i and ii promoters in the absence of camp, binds dna almost as well in the absence as in the presence of camp. binds camp normally."\', \'/note="t->a: no modification of camp-binding."\']', u'[\'/note="s->a: reduced dna-binding; no modification of camp- binding."\', \'/note="ts->li: constitutively active at class i and ii promoters in the absenc…
1890	MUTAGEN	2	r->d,n	4	[u'[\'/note="r->a: considerable increase in pore size and sucrose transport, slight decrease in maltose transport; when associated with a-143."\', \'/note="r->d,n: slight increase in pore size; increase in sucrose transport and slight decrease in maltose transport; when associated with d-143 and f-146."\']', u'[\'/note="r->d,n: protein is hydroxybutyrated."\']']
1891	MUTAGEN	1	t->e,y	4	[u'[\'/note="t->e,y: loss of the epimerase activity due to an increased steric bulk introduced by the mutation which causes a conformational change that is incompatible with catalysis."\']']
1892	MUTAGEN	1	t->g	4	[u'[\'/note="t->g: 230-fold decrease in catalytic efficiency with sla as substrate. 12-fold decrease in catalytic efficiency with nadh as substrate."\']']
1893	MUTAGEN	1	t->m	4	[u'[\'/note="t->m: no recovery of protein cross-linked to sdhe, sdha is flavinylated."\']']
1894	MUTAGEN	1	pp->aa	4	[u'[\'/note="pp->aa: decreased interaction with mzra."\']']
1895	MUTAGEN	1	c->a,y	4	[u'[\'/note="c->a,y: reduces activity and affinity for d- erythrose-4-phosphate and increases affinity for glyceraldehyde 3-phosphate."\']']
1896	MUTAGEN	1	e->m	4	[u'[\'/note="e->m: allows recovery of protein cross-linked to sdhe, sdha is flavinylated."\']']
1897	MUTAGEN	1	e->h	4	[u'[\'/note="e->h: slowly inactivates galactosidase activity by reducing the binding of magnesium. it increases binding specificity."\']']
1898	MUTAGEN	1	llts->plag	4	[u'[\'/note="llts->plag: 15-fold decrease in affinity for ctp and 1.5-fold decrease in catalytic activity. displays a 3-fold decrease in activity with ctp and gains a low activity with gtp as substrate; when associated with 9-l--g-11."\']']
1899	MUTAGEN	1	h->d,f,l,n	4	[u'[\'/note="h->d,f,l,n: less stable to heat than wild-type. causes significant destabilizations of the first transition state."\']']
1900	MUTAGEN	1	rtpr->gtpg	4	[u'[\'/note="rtpr->gtpg: almost abolishes 50s subunit binding."\']']
1901	MUTAGEN	1	d->p	4	[u'[\'/note="missing: in poxb6. inactive in vivo, does not complement inactive mutants. active in vitro, no longer activated by nor binds to, detergents."\', \'/note="d->p: in poxb15; normal activity."\']']
1902	MUTAGEN	1	rtgr->gtgg	4	[u'[\'/note="rtgr->gtgg: reduced dna-binding."\']']
1903	MUTAGEN	4	d->c	4	[u'[\'/note="d->e: highly active."\', \'/note="d->c: decrease in activity."\']', u'[\'/note="d->c: loss of activity."\', \'/note="d->e: strong decrease in activity."\']', u'[\'/note="d->c: loss of activity."\']', u'[\'/note="d->c: loses ability to catalyze na(+) or h(+)- coupled melibiose transport against a concentration gradient."\']']
1904	MUTAGEN	2	d->m	4	[u'[\'/note="d->m: abolishes protein translocation."\']', u'[\'/note="d->m: shows high metal-independent atpase activity. poorly phosphorylated with atp."\']']
1905	MUTAGEN	2	hihh->gggg	4	[u'[\'/note="hihh->gggg: loss of activity. no binding to tunicamycin."\', \'/note="h->s: loss of activity. no binding to tunicamycin."\']', u'[\'/note="hihh->gggg: loss of activity. no binding to tunicamycin."\']']
1906	MUTAGEN	1	dq->aa	4	[u'[\'/note="dq->aa: no effect."\']']
1907	MUTAGEN	2	cadc->sads	4	[u'[\'/note="c->s: forms oxidized monomers."\', \'/note="cadc->sads: forms oxidized monomers."\']', u'[\'/note="cadc->sads: forms oxidized monomers."\']']
1908	MUTAGEN	1	e->s,a,q	4	[u'[\'/note="e->s,a,q: loss of enzymatic activity."\']']
1909	MUTAGEN	1	v->s	4	[u'[\'/note="v->s: 30% increase in both glutamine-dependent and ammonia-dependent activities."\']']
1910	MUTAGEN	1	k->v	4	[u'[\'/note="k->q: 13-fold decrease of the catalytic efficiency and 3-fold increase of the affinity for nadph."\', \'/note="k->v: inversion of cofactor specificity from nadph to nadh; when associated with d-68, l-69 and d-76."\']']
1911	MUTAGEN	1	ekea->aiae	4	[u'[\'/note="ekea->aiae: no longer inhibits growth."\']']
1912	MUTAGEN	3	l->c	4	[u'[\'/note="l->c: decrease in activity."\']', u'[\'/note="l->c: no substrate binding. resistance to toxicants is abolished."\']', u'[\'/note="l->c: about 50% ribosome rescue activity, initial rate."\']']
1913	MUTAGEN	3	r->a,q	4	[u'[\'/note="r->a,q: nearly abolishes dna supercoiling. reduces quinolone-induced dna cleavage and relaxation."\']', u'[\'/note="r->a,q: reduces nick joining activity by over 95%. abolishes nick joining activity; when associated with a- 334."\']', u'[\'/note="r->a,q: reduces nick joining activity by over 95%."\']']
1914	MUTAGEN	1	e->n,q	4	[u'[\'/note="e->n,q: no activity."\']']
1915	MUTAGEN	1	r->a,h	4	[u'[\'/note="r->a,h: strongly increased km for l-aspartate 4- semialdehyde. no effect on km for pyruvate. reduced activity by 99.7%."\']']
1916	MUTAGEN	1	d->c,h	4	[u'[\'/note="d->a: strongly reduced dna supercoiling and relaxation activity. reduces atp hydrolysis in response to dna binding, but has only minor effect on the basal rate of atp hydrolysis."\', \'/note="d->c,h: alters metal-dependency of atp-independent dna relaxation, prefers mn(2+) and co(2+) over wild-type mg(2+)."\']']
1917	MUTAGEN	2	yy->aa	4	[u'[\'/note="yy->aa: defective in dna-unwinding activity."\']', u'[\'/note="yy->aa: 3-fold decreased growth rate; loss of association with 30s ribosomal subunit; loss of interaction with s19."\']']
1918	MUTAGEN	1	f->l,s	4	[u'[\'/note="f->l,s: abolishes interaction with dnaa. strongly reduces dnaa-dependent dna synthesis."\']']
1919	MUTAGEN	1	k->a,c,q	4	[u'[\'/note="k->a,c,q: 625 to 830-fold reduction in catalytic activity."\']']
1920	MUTAGEN	1	w->f,g,l,t	4	[u'[\'/note="w->f,g,l,t: decreases affinity for substrate."\']']
1921	MUTAGEN	3	y->e	4	[u'[\'/note="y->e: abolishes enzyme activity."\']', u'[\'/note="y->e: lowers activity more than 1000-fold."\']', u'[\'/note="y->e: partially unstable, loss of amia and amib activation; does not complement double envc-nlpd disruption, protein localizes normally."\']']
1922	MUTAGEN	1	kaml->aama	4	[u'[\'/note="kaml->aama: 3-fold decreased affinity for nusa, less efficient in delaying or suppressing rho-dependent transcription termination."\']']
1923	MUTAGEN	2	y->v	4	[u'[\'/note="y->v: eliminates the self-association, but does not affect regulation properties of the protein."\']', u'[\'/note="y->v: confers specificity for the non-natural amino acid 3-iodo-tyrosine; when associated with c-195."\']']
1924	MUTAGEN	1	mk->aa	4	[u'[\'/note="mk->aa: no effect."\']']
1925	MUTAGEN	1	s->a,h	4	[u'[\'/note="s->a,h: reduction of the catalytic efficiency by over 65%. no effect on the affinity for cholate and nad."\']']
1926	MUTAGEN	1	f->g	4	[u'[\'/note="f->d: 100-fold decrease in catalytic activity."\', \'/note="f->g: 4-fold and 8-fold decrease in catalytic activity and affinity, respectively."\']']
1927	MUTAGEN	2	mf->kk	4	[u'[\'/note="qadmf->padmp: loss of interaction with beta sliding clamp (dnan)."\', \'/note="adm->ldl: increases binding to beta sliding clamp (dnan), increases stability of enzyme complex."\', \'/note="mf->kk: loss of interaction with beta sliding clamp (dnan)."\']', u'[\'/note="qadmf->padmp: loss of interaction with beta sliding clamp (dnan)."\', \'/note="mf->kk: loss of interaction with beta sl…
1928	MUTAGEN	1	casc->sass	4	[u'[\'/note="missing: loss of growth in the presence of cuso(4), loss of cu efflux."\', \'/note="casc->aasa: wild-type growth in the presence of cuso(4), no change in cu efflux. still forms phosphate intermediate; when associated with 14-a--a-17."\', \'/note="missing: no resistance to cuso(4), does not form phosphate intermediate."\', \'/note="casc->sass: loss of cuso(4)-stimulation of atpase. wh…
1929	MUTAGEN	2	g->i	4	[u'[\'/note="g->i: loss of phosphate transport."\']', u'[\'/note="g->i: strong decrease in the reaction rate for the conversion of formate to fgar and in the affinity for formate. 3- and 2-fold decrease in the affinity for atp and gar, respectively."\']']
1930	MUTAGEN	2	h->w	4	[u'[\'/note="h->w: catalytically inactive for both the glutamine- dependent and ammonia-dependent reactions and fails to interact with paba."\']', u'[\'/note="h->w: lacks oxidoreductase activity, but is still able to activate potassium efflux."\']']
1931	MUTAGEN	1	caac->aaaa	4	[u'[\'/note="caac->saas: reduces the atpase activity by 50%. reduces level of phosphorylation."\', \'/note="caac->aaaa: 2-3-fold decrease in atpase activity. binds metal ion only at the transmembrane site."\']']
1932	MUTAGEN	1	l->a,p	4	[u'[\'/note="l->a,p: abolishes interaction with dnaa. strongly reduces dnaa-dependent dna synthesis."\']']
1933	MUTAGEN	1	ys->vdypydvpdya	4	[u'[\'/note="ys->vdypydvpdya: loop 7 to ha epitope; fully resistant to cdia-ec93, does not form aggregates with cdia- ec93 cells."\']']
1934	MUTAGEN	1	wqrl->hqry	4	[u'[\'/note="wqrl->hqry: 1.5-fold increased binding to dmsa signal sequence."\']']
1935	MUTAGEN	2	f->a,l	3	[u'[\'/note="f->a,l: loss of activity. iron content reduced by about 50%. can cleave up to one molecule of s-adenosyl-l- methionine (in vitro)."\']', u'[\'/note="f->a: export of tora restored; when associated with a-211."\', \'/note="f->a,l: loss of function."\']']
1936	MUTAGEN	3	k->q,r	3	[u'[\'/note="k->q,r: strong decrease in acetylation."\']', u'[\'/note="k->q,r: loses the ability to bind to atp or adp."\']', u'[\'/note="k->q,r: reduces nick joining activity by 99.9%."\']']
1937	MUTAGEN	1	elt->aaa	3	[u'[\'/note="elt->aaa: does not affect flippase activity."\']']
1938	MUTAGEN	1	ess->nhg	3	[u'[\'/note="ess->nhg: abolishes chromosomal recombination but not plasmid resolution."\']']
1939	MUTAGEN	1	sat->aaa	3	[u'[\'/note="sat->aaa: retains crispr immunity to lambda dna and crispr-mediated plasmid curing."\']']
1940	MUTAGEN	1	hhh->qqq	3	[u'[\'/note="hhh->qqq: no change in copper resistance."\']']
1941	MUTAGEN	3	p->t	3	[u'[\'/note="p->t: loss of glycosylase and ap lyase activity."\']', u'[\'/note="p->t: no effect on arfa rescue of stalled ribosomes."\']', u'[\'/note="p->t: loss of gtpase activity and creation of an autophosphorylation site."\']']
1942	MUTAGEN	2	p->r	3	[u'[\'/note="p->e,g: low amounts of protein, no methyase activity, no binding to s-adenosyl-methionine."\', \'/note="p->r: protein stable, no methylase activity, no binding to s-adenosyl-methionine."\']', u'[\'/note="p->v: confers sensitivity to cold."\', \'/note="p->r: in era1; suppresses a number of temperature- sensitive mutations affecting cell cycle."\']']
1943	MUTAGEN	1	p->i	3	[u'[\'/note="p->i: decreased motility, subnormal torque, tethered strains rotate very slowly."\']']
1944	MUTAGEN	2	i->r	3	[u'[\'/note="i->r: protein remains toxic."\']', u'[\'/note="i->r: blocks dimerization. loss of activity."\']']
1945	MUTAGEN	3	i->e	3	[u'[\'/note="i->a: almost no change in activity."\', \'/note="i->e: strong decrease in activity."\']', u'[\'/note="i->d: decrease in activity."\', \'/note="i->e: no change in activity."\']', u'[\'/note="i->e: prevents localization to the z ring. lack of activity."\']']
1946	MUTAGEN	2	s->a,c	3	[u'[\'/note="s->a,c: loss of catalytic activity."\']', u'[\'/note="s->a,c: almost no change in activity."\']']
1947	MUTAGEN	2	q->c	3	[u'[\'/note="q->n: highly active."\', \'/note="q->c: decrease in activity."\']', u'[\'/note="q->c: confers specificity for the non-natural amino acid 3-iodo-tyrosine; when associated with v-37."\']']
1948	MUTAGEN	1	fvy->ava	3	[u'[\'/note="fvy->ava: about 5% ribosome rescue activity with arfa, initial rate."\']']
1949	MUTAGEN	1	s->sgs	3	[u'[\'/note="s->sgs: in lamb375; decreased protein at 37 but not 30 degrees celsius, reduced starch binding, no growth on dextrins, decreased affinity for maltose, loss of phage lambda binding."\']']
1950	MUTAGEN	2	e->a,d	3	[u'[\'/note="e->a,d: does not affect cn(-1) and co coordination."\']', u'[\'/note="e->a,d: almost no change in activity."\']']
1951	MUTAGEN	1	s->h	3	[u'[\'/note="s->h: much less active than the wild-type."\']']
1952	MUTAGEN	1	d->e,g,s	3	[u'[\'/note="d->e,g,s: does not affect the formation of murein- bound lipoprotein."\']']
1953	MUTAGEN	2	rer->aea	3	[u'[\'/note="rer->aea: significant reduction in endonuclease activity, still binds relb."\', \'/note="r->a: reduces mrna cleavage rate constant 60000- fold, significantly less translation inhibition which is countered by relb. almost complete loss of mrna cleavage; when associated with f-87."\']', u'[\'/note="rer->aea: significant reduction in endonuclease activity, still binds relb."\']']
1954	MUTAGEN	1	n->a,q,d	3	[u'[\'/note="n->s: 51% of wild-type specific activity. inactivates wild-type subunits; when associated with q-15."\', \'/note="n->a,q,d: loss of activity."\']']
1955	MUTAGEN	2	c->q	3	[u'[\'/note="c->q: 50-fold increase in apparent binding of platensimycin."\']', u'[\'/note="c->q: no change in transport activity."\']']
1956	MUTAGEN	2	r->d,e	3	[u'[\'/note="r->d,e: no change in activity."\']', u'[\'/note="r->d,e: 2-fold reduction in activation of class ii crp-dependent promoters."\']']
1957	MUTAGEN	1	frk->aaa	3	[u'[\'/note="frk->aaa: decreases association with ribosomes."\']']
1958	MUTAGEN	1	v->t	3	[u'[\'/note="v->t: little stereoselectivity, accepting kdpg and kdpgal as substrate with roughly equal efficacy. reduced the preference for kdpgal. it diminishes the activity against kdpgal and increases activity against kdpg."\']']
1959	MUTAGEN	1	lsl->aaa	3	[u'[\'/note="lsl->aaa: does not affect flippase activity."\']']
1960	MUTAGEN	3	mtm->iti	3	[u'[\'/note="mtm->iti: binds cu(+) very poorly, does not receive cu(+) from copa."\', \'/note="m->i: loss of copper resistance and strong decrease in copper binding; when associated with i-71."\']', u'[\'/note="mtm->iti: binds cu(+) very poorly, does not receive cu(+) from copa."\']', u'[\'/note="mtm->iti: binds cu(+) very poorly, does not receive cu(+) from copa."\', \'/note="m->i: loss of coppe…
1961	MUTAGEN	1	kyr->aya	3	[u'[\'/note="kyr->aya: about 2-fold decreased binding to mature and immature 30s ribosomes, gtpase activity stimulated by ribosomes."\']']
1962	MUTAGEN	2	t->r	3	[u'[\'/note="t->a: autophosphorylation by cdd is somewhat resistant to waldiomycin."\', \'/note="t->r: in envz11/mh1461; ompf- ompc constitutive. also prevents expression of phoa and lamb. phosphorylates ompr but does not dephosphorylate it."\']', u'[\'/note="t->a: abolishes editing activity against valine, with little change in aminoacylation activity."\', \'/note="t->r: abolishes pretransfer ed…
1963	MUTAGEN	1	l->y,f	3	[u'[\'/note="l->y,f: no change in activity."\']']
1964	MUTAGEN	2	e->g	3	[u'[\'/note="e->k: becomes partially sensitive to phage m1. increased resistance to colicin l."\', \'/note="emgydwlgrmpykgsvengaykaqgvqltak->cmgydwlgrmpykgsveng aykaqgvqltac: nearly normal growth in absence of nacl, reducing agent (0.05% beta-mercaptoethanol) has no effect."\', \'/note="missing: becomes partially sensitive to phage m1."\', \'/note="e->g: becomes partially sensitive to phages k3h1…
1965	MUTAGEN	2	e->a,d,n,q	3	[u'[\'/note="e->a,d,n,q: strong decrease in both uptake and excretion activities."\']', u'[\'/note="e->a,d,n,q: lack of both uptake and excretion activities."\']']
1966	MUTAGEN	3	d->q	3	[u'[\'/note="d->q: loss of autophosphorylation; cells grow normally; protein can accumulate to high levels in e.coli."\']', u'[\'/note="d->q: loss of autophosphorylation; cells grow normally."\']', u'[\'/note="d->q: does not induce cps operon expression. lack of phosphatase activity."\']']
1967	MUTAGEN	2	cpc->apa	3	[u'[\'/note="c->h,s: decrease in activity. binds zn(2+), cd(2+), ni(2+), co(2+) and cu(2+), but not pb(2+)."\', \'/note="cpc->sps: lack of atpase activity. loss of zinc- stimulated phosphorylation."\', \'/note="c->a: lack of activity. cannot bind metal at the transmembrane site. lack of phosphorylation with atp."\', \'/note="cpc->apa: lack of atpase activity. binds metal ion only at the n-termina…
1968	MUTAGEN	1	taa->lag	3	[u'[\'/note="taa->lag: 12-fold decrease in affinity for ctp and 3-fold decrease in catalytic activity. displays a 3-fold decrease in activity with ctp and gains a low activity with gtp as substrate; when associated with 79-p--g-82."\']']
1969	MUTAGEN	1	q->tlsakveqlsndvnq	3	[u'[\'/note="missing: does not affect the formation of murein- bound lipoprotein, has almost no surface-exposed lpp. cells are mucoid."\', \'/note="q->tlsakveqlsndvnamrsdvdq: periplasm is 4 nm larger than wild-type, cells no longer trigger rcs system."\', \'/note="q->tlsakveqlsndvnq: periplasm is 3 nm larger than wild-type, cells no longer trigger rcs system."\']']
1970	MUTAGEN	2	m->h	3	[u'[\'/note="m->a,i: ferrous heme iron changes from an exclusively hexacoordinate low-spin form to an exclusively pentacoordinate high-spin form. ferric heme iron remains hexacoordinate but becomes a mixture of high and low spin. increases c-di-gmp pde activity 7-fold in absence of o(2), co or no, no additional increase upon addition of gases (m- a only)."\', \'/note="m->h: no change in heme coor…
1971	MUTAGEN	1	r->k,i,v,e	3	[u'[\'/note="r->k,i,v,e: completely defective."\']']
1972	MUTAGEN	2	r->a,w	3	[u'[\'/note="r->a,w: abolishes xylose transport."\']', u'[\'/note="r->a,w: decrease in activity."\']']
1973	MUTAGEN	1	gvn->avd	3	[u'[\'/note="gvn->avd: leads to the same phenotype as the ubii deletion mutant, indicating a strongly impaired catalytic activity."\']']
1974	MUTAGEN	1	nhg->ess	3	[u'[\'/note="nhg->ess: abolishes plasmid resolution but not chromosomal recombination."\']']
1975	MUTAGEN	1	h->e,f	3	[u'[\'/note="h->a: does not prevent transport of ammonia. loss of transport activity with methylammonium and methylamine. shows normal glnk-amtb complex formation after ammonium shock. loss of both methylamine and ammonia transport; when associated with a-190."\', \'/note="h->t: loss of transport activity with methylammonium as substrate."\', \'/note="h->e,f: loss of transport activity with methy…
1976	MUTAGEN	2	h->a,y	3	[u'[\'/note="h->a,y: defective in dna binding."\']', u'[\'/note="h->a,y: reduces nick joining activity by 90%."\']']
1977	MUTAGEN	1	f->y,n,s,v	3	[u'[\'/note="f->y,n,s,v: less resistant to trypsin."\']']
1978	MUTAGEN	1	krr->ttt	3	[u'[\'/note="missing: remains membrane associated and retains in vitro and in vivo activity."\', \'/note="krr->ttt: undergoes altered post-translational processing and has much lower in vivo and in vitro activity."\']']
1979	MUTAGEN	1	k->g,i,q,r	3	[u'[\'/note="missing: almost no stimulation of k(+) uptake by trkh."\', \'/note="k->g,i,q,r: 25% to 50% stimulation of k(+) uptake by trkh."\']']
1980	MUTAGEN	3	s->a,n	3	[u'[\'/note="s->a,n: almost no change in activity."\']', u'[\'/note="s->a,n: reduced repressor activity. loss of glyoxylate-triggered dissociation from dna."\']', u'[\'/note="s->a,n: lack of activity."\']']
1981	MUTAGEN	3	dkr->aaa	3	[u'[\'/note="dkr->aaa: almost complete loss of protein tagging by trans-translation, binds tmrna normally, binds ribosomes normally."\']', u'[\'/note="kr->aa: about half loss of protein tagging by trans- translation, binds tmrna normally, binds ribosomes normally."\', \'/note="dkr->aaa: almost complete loss of protein tagging by trans-translation, binds tmrna normally, binds ribosomes normally."\…
1982	MUTAGEN	1	n->p	3	[u'[\'/note="n->p: significantly impairs the mannose transport capacity."\']']
1983	MUTAGEN	1	f->a,h,l,q,s,w	3	[u'[\'/note="f->a,h,l,q,s,w: loss of transport activity with methylammonium as substrate."\']']
1984	MUTAGEN	1	dd->ss	2	[u'[\'/note="dd->ss: still induces degp when overexpressed, remains in inner membrane."\']']
1985	MUTAGEN	1	a->d,p	2	[u'[\'/note="a->d,p: decreased transcription activation (6-29%), binds dna."\']']
1986	MUTAGEN	1	qd->aa	2	[u'[\'/note="qd->aa: slight decrease in levels of yebf secretion."\']']
1987	MUTAGEN	1	f->a,y	2	[u'[\'/note="f->a,y: loss of tellurite resistance."\']']
1988	MUTAGEN	1	n->a,d	2	[u'[\'/note="n->a,d: strongly reduced dna binding."\']']
1989	MUTAGEN	1	aa->dd	2	[u'[\'/note="aa->dd: significantly less degradation by clpx-clpp when present as a 1-108 peptide fragment."\']']
1990	MUTAGEN	1	f->i,l	2	[u'[\'/note="f->i,l: increased chaperone activity, substrate affinity and chaperone flexibility."\']']
1991	MUTAGEN	1	dn->aa	2	[u'[\'/note="dn->aa: impaired in adp-binding, has beta clamp- binding activity in vitro."\']']
1992	MUTAGEN	1	g->enlyfqg	2	[u'[\'/note="g->enlyfqg: temperature-sensitive at 42 degrees celsius; when associated with 483-l--s-487. protein is not stable."\']']
1993	MUTAGEN	2	d->a,h	2	[u'[\'/note="d->a,h: loss of function."\']', u'[\'/note="d->a,h: acts at variant chi sequences."\']']
1994	MUTAGEN	1	vi->aa	2	[u'[\'/note="vi->aa: reduces nick joining activity by 95%."\']']
1995	MUTAGEN	1	d->n,e	2	[u'[\'/note="d->n,e: little effect on the kinetic properties."\']']
1996	MUTAGEN	1	t->a,p	2	[u'[\'/note="t->a,p: decrease in activity; no effect on dna- binding."\']']
1997	MUTAGEN	1	gf->dy	2	[u'[\'/note="gf->dy: 3-fold improved induction of degp upon overexpression; when associated with q-136."\']']
1998	MUTAGEN	1	s->a,k	2	[u'[\'/note="s->a,k: no modification of camp-binding."\']']
[truncated: 1,279 more rows]
[truncated: 232 more columns]
