# Supplementary material for: Establishing comprehensive quaternary structural proteomes from genome sequence
Source: Research Square preprint supplement (doi:10.21203/rs.3.rs-2923626/v1), 2023-05-19
Supplement: Supplementary file 6 [file f67a19efecad51eee0ea71a8.xlsx]

## Sheet: Description
				Dataset S8
				This dataset contains i) the Blattner and UniProt IDs for the E.coli genome and ii) the oligomerization of the bioassembly PDB files used in this study (Fig. S7C). The oligomerization of Bioassembly entities to PDB entities allows GSPAT to utilize structures of various oligomerization states to recreate the annotate protein-gene stoichiometries. This data was generated by parsing through the CIF …

## Sheet: 000A-blattner_uniprot
Blattner Number	UniProtId
b3356	P0ADX1
b2922	P0ADS6
b2519	P76577
b2518	P0A763
b3352	P63389
b3353	P45524
b1500	P76136
b2923	P11667
b2513	P76576
b2512	P77774
b2511	P0A6P5
b2510	P76575
b2517	P36979
b2516	P27434
b2515	P62620
b2514	P60906
b3355	P0AEX5
b3258	P16256
b3120	P11865
b3825	P07000
b3357	P0ACJ8
b2924	P0C0S1
b2199	P0ABM1
b2198	P0ABM5
b2197	P69490
b2196	P33927
b2195	P0AA86
b2194	P0ABM9
b2193	P31802
b2192	P0CE55
b4016	P11071
b2190	P33924
b3734	P0ABB0
b2698	P33596
b3736	P0ABA0
b3737	P68699
b2359	P76512
b2358	P0AD35
b2609	P0A7T3
b2608	P0A7X6
b2607	P0A873
b2354	P77656
b2357	P76510
b2356	P76509
b2351	P77293
b2350	P77682
b2601	P00888
b2352	P76507
b2175	P0AFV4
b2174	P76445
b2177	P33913
b2176	P76446
b2171	P0A6N8
b2170	P33026
b2173	P33030
b2172	P33029
b3987	P0A8V2
b2179	P33915
b2178	P0AFU0
b3454	P22731
b2997	P69741
b2996	P0AAJ8
b2995	P37180
b2994	P0ACE0
b2993	P37182
b2992	P0AAN1
b2991	P0A703
b2990	P0AAM7
b1897	P31678
b1896	P31677
b1895	P46888
b1894	P0CF11
b1893	P0CF28
b1892	P0A8S9
b1891	P0ABY7
b1890	P09348
b3404	P0AEJ4
b3858	P0ADP9
b3408	P0AEL3
b4013	P07623
b1097	P28306
b1096	P28305
b1095	P0AAI5
b1094	P0A6A8
b1093	P0AEK2
b1092	P0AAI9
b1091	P0A6R0
b1090	P27247
b1099	P28631
b1098	P0A720
b3409	P33650
b2238	P45505
b3207	P64610
b2876	Q46809
b1918	P0AFT2
b2777	P64554
b2776	P55138
b2775	P77031
b1919	P76316
b2771	Q46909
b2770	Q46908
b3350	P45522
b2779	P0A6P9
b2778	P55140
b1273	P0AB61
b1272	P0AG14
b1271	P31808
b1270	P0A9H5
b1277	P0A7I7
b1276	P25516
b1275	P0A9F3
b1274	P06612
b1279	P0ACV4
b1278	P0A924
b4573	P30192
b4359	P39401
b3458	P04816
b4518	P56614
b3351	P0A756
b4352	P24203
b4351	P24202
b4350	P08956
b4357	P39399
b1859	P39832
b4355	P02942
b4354	P39396
b1858	P0A9X1
b1916	P07026
b4572	P77129
b1917	P37774
b0708	P00914
b0709	P75742
b1653	P30015
b1652	P30014
b1655	P76190
b1654	P0AC69
b0878	P75830
b0879	P75831
b0700	P16918
b0877	P75829
b0702	P0AAU5
b0875	P60844
b0704	P28915
b0873	P75825
b0706	P28916
b0707	P24252
b4137	P69488
b1325	P51981
b4135	P0ACU7
b4133	P23890
b4132	P0AAE8
b4131	P0A9H3
b4130	P39276
b2218	P0DMC5
b4389	P24554
b1327	P76049
b4139	P0AC38
b4138	P0ABN5
b1479	P26616
b1478	P39451
b2930	P21437
b1326	P0ACV6
b1471	P76123
b1321	P76046
b1473	P46136
b1472	P77519
b1475	P0AAJ3
b1474	P24183
b1477	P67699
b1476	P0AEK7
b1323	P07604
b3735	P0ABA4
b4570	P77184
b1322	P0A8R7
b0674	P22106
b0675	P0AF24
b0676	P0AF20
b0677	P0AF18
b4486	P39393
b3730	P0ACC7
b0678	P0A759
b0679	P09323
b3731	P0A6E6
b2948	P0A8W5
b0298	P0CF66
b0299	P0CF79
b0296	P0A7N1
b0102	P36680
b0294	P71301
b0295	P56257
b0292	P77188
b0293	P0AAA3
b0290	P77694
b0291	P77802
b1505	P76137
b1504	P77789
b1507	P23874
b4000	P0ACF0
b0058	P0AA37
b0059	P60240
b1503	P77294
b1502	P77588
b0054	P31554
b0055	P31680
b0056	P39220
b0057	P39221
b0050	P62672
b0051	P06992
b0052	P19624
b0053	P0ABZ6
b2604	P46139
b2603	P64548
b2602	P11289
b0906	P75839
b0907	P23721
b0904	P0AC23
b0905	P75838
b0902	P0A9N4
b0903	P09373
b0456	P0AAQ6
b0457	P77473
b0458	P0AAS0
b0459	P77791
b2600	P07023
b0908	P0A6D3
b0909	P43674
b4002	P0AAA9
b3457	P0AEX7
b4245	P0A786
b4241	P36673
b3358	P45537
b4226	P0A7A9
b4240	P36672
b1370	P76071
b1336	P46133
b3359	P18335
b4366	P39404
b2949	P0A8I1
b1337	P76052
b3039	P24197
b3038	P0ADT5
b3037	P0ADT2
b3036	A0A385XJN2
b3035	P02930
b3034	Q93K97
b3033	P0ADU7
b3032	P0AEW4
b3031	P0A8Z7
b3030	P20083
b3918	P06282
b4227	P39325
b3919	P0A858
b3587	P0ADK4
b3586	P37683
b2938	P21170
b3584	P37681
b3583	P37680
b3582	P37679
b3581	P37678
b3580	P37677
b2035	P37748
b3589	P37686
b3588	P37685
b3412	P13001
b2856	Q46791
b3915	P69380
b3916	P0A796
b3917	P0AG78
b4005	P15640
b2852	P76639
b2853	Q46789
b3543	P0AEF8
b3912	P0AE88
b3542	P0AEG1
b3103	P64590
b3102	P42620
b3101	P42619
b2851	Q46787
b3107	P42625
b3106	P42624
b3105	P67660
b3104	P64592
b3363	P0AFL3
b3362	P0ADX5
b3361	P20605
b3360	P00903
b3367	P0AC26
b3366	P0A9I8
b3365	P08201
b3364	P60778
b3547	P37662
b3369	P64627
b3368	P0AEA8
b3418	P06993
b3546	P37661
b2499	P08178
b3691	P0AA76
b3690	P31456
b3697	P0A8Y5
b3696	P0ADM6
b3699	P0AES6
b3544	P23847
b4222	P0AE48
b2188	P0AD27
b2180	P33916
b2181	P0AD21
b2182	P28246
b2183	P0AA43
b2184	P33919
b2185	P68919
b2186	P33920
b2187	P0AD24
b2618	P52119
b2619	P0AGL5
b3215	P28722
b3214	P28721
b3213	P09832
b3212	P09831
b3211	P0ADW6
b2349	P37326
b2346	P76506
b2347	P37327
b2344	P10384
b2345	P76505
b2342	P76503
b2343	P0AD33
b2340	P76502
b2341	P77399
b2166	P30235
b2167	P20966
b2164	P33024
b2165	P33025
b2162	P33022
b2163	P0A9E9
b2160	P33020
b2161	P33021
b3657	P31435
b2168	P0AEW9
b2169	P69811
b1888	P07363
b1889	P0AF06
b2982	P0CE56
b2983	Q46841
b2984	P64572
b2985	Q46843
b2986	Q46844
b2987	P43676
b1880	P76299
b1881	P0A9H9
b1882	P0AE67
b1883	P07330
b1884	P07364
b1885	P07018
b1886	P07017
b1887	P0A964
b2452	P76552
b2453	P76553
b2450	P76550
b2504	P64545
b2505	P65290
b2506	P76573
b2451	P76551
b2500	P08179
b2501	P0A7B1
b2502	P0AFL6
b2503	P77172
b2456	P0AEJ8
b2508	P0ADG7
b2509	P04994
b2457	P0ABF4
b1080	P0A6S3
b1081	P75942
b1082	P33235
b1083	P29744
b1084	P21513
b1085	P62066
b1086	P0AA39
b1087	P0A729
b1088	P0AB28
b1089	P0A7N4
b2455	P77445
b3346	P64624
b4734	P0DPN4
b4069	P27550
b1522	P76147
b3063	P39414
b3341	P02359
b1521	P0A6L7
b4006	P15639
b2760	Q46901
b2761	P38036
b2762	P17854
b1520	P76146
b2764	P38038
b2765	P65870
b2766	Q46904
b2767	Q46905
b2768	Q46906
b2769	Q46907
b4567	P55914
b4415	P77091
b4170	P23367
b4345	P15006
b4346	P15005
b4347	P39394
b1268	P45848
b1269	P37765
b4342	P39391
b1264	P00895
b1265	P0AD92
b1266	P77766
b1267	P0AFR4
b1260	P0A877
b1261	P0A879
b1262	P00909
b1263	P00904
b4061	P32701
b4060	P32700
b1529	P0AEY1
b4177	P0A7D4
b1528	P31122
b4529	P0ACW2
b4065	P32703
b0037	P31552
b1642	P0A8W2
b1643	P64471
b0849	P68688
b0848	P64439
b1646	P0AGD1
b1647	P76187
b1644	P76185
b1645	P76186
b0843	P0AAY4
b0842	P0AEY8
b0841	P75806
b0840	P0ACK5
b0847	P60869
b0846	P75811
b0845	P75810
b0844	P75809
b4120	P02921
b4121	P39270
b4122	P14407
b4123	P0ABN9
b0119	P0A8E5
b0118	P36683
b3342	P0A7S3
b4127	P39274
b4128	P0AF61
b0114	P0AFG8
b0117	P36682
b0116	P0A9P0
b0111	P0AE14
b0110	P13016
b0113	P0ACL9
b0112	P15993
b1468	P19319
b1469	P37758
b1462	P76121
b1463	P77567
b1460	P28917
b1461	P31992
b1466	P19317
b1467	P19318
b1464	P37757
b1465	P0AF32
b0591	P24077
b0590	P23876
b0593	P0AEJ2
b0592	P0AEL6
b0595	P0ADI4
b0594	P10378
b0597	P0A8Y8
b0596	P15047
b0599	P45579
b0598	P15078
b0601	P77174
b0600	P77806
b0603	P77746
b0602	P77216
b0605	P0AE08
b0604	P77202
b0607	P39177
b0606	P35340
b4174	P0ABC7
b0608	P77316
b4216	P39187
b0029	P62623
b0028	P0AEM0
b1514	P77672
b1515	P0AFS1
b1512	P76141
b1513	P77257
b1511	P77432
b0021	P0CF25
b0020	P0A9G2
b0023	P0A7U7
b0022	P0CF07
b0025	P0AG40
b0024	P75620
b0027	P00804
b0026	P00956
b4094	P16690
b4217	P0ADE2
b3719	P31471
b4096	P16679
b0933	P0AAI1
b0932	P04825
b0931	P18133
b0930	P0A8M0
b0937	P80644
b0936	P75853
b0935	P80645
b0934	P75851
b4090	P37351
b0939	P75856
b0938	P75855
b2947	P04425
b4224	P08365
b0929	P02931
b3989	P27375
b3247	P0A9J0
b4092	P16692
b3712	P0ADM8
b4093	P16691
b3241	P46482
b0335	P77495
b0334	P77243
b0337	P25524
b0336	P0AA82
b0331	P77541
b0330	P77743
b0333	P31660
b3243	P67662
b0339	P0ABE9
b0338	P27111
b4738	P0DPN8
b3988	P0A8T7
b4658	Q46850
b4655	A8DYQ1
b3348	P0A8R4
b3218	P0CE57
b3210	P0AEC3
b3755	P31475
b4464	Q46817
b4004	P14375
b3028	P0AEY5
b3029	P0ADU2
b3020	Q46863
b3021	Q46864
b3022	Q46865
b3023	Q46866
b3024	P0ADU5
b3025	P52076
b3026	P40719
b3027	Q46867
b2774	P76633
b4218	P0AE45
b2024	P10371
b3590	P14081
b3591	P0A821
b3592	P0ACA1
b3593	P16916
b3594	P0ADK6
b3595	P32109
b3596	P32106
b3597	P0AFV0
b3598	P32108
b3599	P00550
b4223	A0A385XK32
b4032	P68183
b3114	P42632
b3115	P11868
b3116	P0AAD8
b3117	P0AGF6
b3110	P42628
b3113	P0AGL2
b3986	P0A7K2
b3118	P0ACQ7
b3119	P11866
b4664	C1P616
b4033	P02916
b3983	P0A7J7
b4320	P08191
b4662	C1P5Z7
b3399	P64636
b3378	P64631
b3379	P45548
b4358	P39400
b3374	P45543
b3375	P45544
b3376	P45545
b3377	P45546
b3370	P45539
b3371	P0AC00
b4030	P0A7C8
b3859	P0C0K3
b3688	P0ADM4
b3689	P31455
b0240	P24251
b3684	P31453
b3685	P60872
b3686	P0C058
b3687	P0C054
b3680	P31449
b3681	P31450
b3429	P0A6U8
b3683	P31452
b3200	P0ADV1
b1372	P76072
b2379	P77434
b2378	P0ACV2
b3204	P69829
b3205	P0A894
b3206	P0A9N0
b1373	P77163
b2373	P0AFI0
b2372	P0AA49
b2371	P76518
b2370	P30855
b2377	P76521
b2376	O32528
b2375	P76520
b2374	P69902
b2153	P0A6T5
b2152	P25747
b2151	P25748
b2150	P0AEE5
b2157	P0ACR4
b2156	P25737
b2155	P17315
b2154	P33018
b2405	P23841
b1376	P37903
b2159	P0A6C1
b2158	P62723
b2400	P04805
b1377	P77747
b3980	P0CE48
b2979	P0AEP9
b1374	P0ADI0
b2975	Q46839
b3973	P06709
b2977	P0AEQ1
b1375	P76073
b2971	Q46835
b3668	P09835
b3974	P0A6I3
b2972	Q46836
b2081	P76403
b2080	P76402
b2082	P37057
b2085	P76406
b2086	P76407
b2089	P0CF83
b2088	P0CF70
b4462	P76616
b0871	P07003
b2571	P0AFX9
b2570	P46187
b2573	P0AGB6
b2572	P0AFX7
b2575	P31825
b2574	P10902
b2577	P33634
b2576	P21507
b2579	P68066
b2578	P38101
b3433	P0A9Q9
b1079	P0A6S0
b1078	P0ABX5
b3432	P07762
b1075	P75936
b1074	P0ABX2
b1077	P75938
b1076	P75937
b1071	P0AEM4
b1070	P43533
b1073	P0ABW9
b1072	P75933
b1981	P76350
b4353	P0ADC8
b1983	P0A8A2
b1982	P0AE12
b1985	P76352
b1987	Q47083
b1988	Q47005
b2538	P0ABR5
b2889	Q46822
b2888	Q46821
b2829	P37177
b2881	Q46814
b2880	P64557
b2883	P76641
b2828	P60955
b2887	Q46820
b2886	Q46819
b2827	P0A884
b2799	P0A9S1
b2798	P38506
b2826	P33554
b2795	P0ADR8
b2794	Q46920
b2797	P30744
b2796	P0AAD6
b2791	P0AA41
b2537	Q47141
b2793	P0A8U0
b2792	Q46919
b1219	P0AB52
b1218	P39163
b4333	P39382
b2536	Q47142
b4335	P39384
b4334	P39383
b4337	P39386
b4336	P39385
b1211	P0A7I0
b1210	P0A6X1
b1213	Q46755
b1212	P0ACC1
b1215	P0A715
b1214	P0AGM5
b1217	P0AE63
b1216	P31801
b1189	P0A6J5
b1188	P29013
b4558	P0ADN6
b2821	P05458
b1181	P0A8L5
b1180	P76004
b1183	P0AG11
b1182	P77335
b1185	P0A6M2
b1184	P04152
b1187	P0A8V6
b1186	P0AFA7
b0854	P31133
b0855	P31134
b0856	P31135
b0857	P0AFL1
b0850	P46119
b0851	P17117
b0852	P0C0U4
b0853	P0AAY6
b3943	P0ABT8
b0858	P0AAZ0
b0859	P75817
b1853	P46118
b1852	P0AC53
b1851	P0ADF6
b1850	P0A955
b1857	P39172
b1856	P0AFS9
b1679	P76194
b1678	P76193
b1677	P69776
b1676	P0AD61
b1675	P0ACX5
b1674	P0AAL6
b1673	P76192
b1672	P77564
b1671	P77375
b1670	P77409
b1457	P31991
b1324	P0A862
b1455	P76118
b1454	P76117
b1453	P77610
b1320	P77615
b1451	P76115
b1450	P76114
b0106	P36646
b0107	P36645
b0104	P60560
b4484	P0AE85
b1329	P77348
b0103	P0A6I9
b4481	P56258
b0101	P0A8H8
b1695	P0A9U8
b1694	P37766
b1697	P76201
b1696	P77402
b1691	P76198
b1690	P76197
b1693	P05194
b1692	P0A6D5
b4200	P02358
b4244	P0A7F3
b4246	P0AD83
b1699	P77337
b1698	P77378
b4243	P0AF93
b4242	P0ABB8
b0582	P0CF92
b0583	P19925
b0580	P77506
b0581	P77213
b0586	P11454
b0587	P26266
b0584	P05825
b0585	P13039
b0588	P23878
b0589	P23877
b1877	P76296
b0612	P0AE74
b0613	P77231
b0610	P0AFW4
b0611	P21338
b0616	P0A9I1
b0617	P69330
b0614	P0A6G5
b0615	P75726
b1328	P77333
b1871	P76291
b0618	P77390
b0619	P77510
b1870	P76290
b2835	P39196
b1657	P77389
b1936	P76323
b1656	P0AGD3
b1523	P76148
b0876	P75828
b0038	P31572
b0039	P60584
b1527	P76150
b1526	P77309
b1525	P76149
b1524	P0A6W0
b0032	P0A6F1
b0033	P00968
b0030	P22564
b0031	P04036
b0036	P31551
b0874	P75826
b0034	P0AE58
b0035	P39206
b0703	P77779
b0872	P75824
b1878	P76297
b4205	P39309
b0928	P00509
b0870	P75823
b0924	P22523
b0925	P22525
b0926	P0AB06
b0927	P75849
b0920	P0AB01
b0921	P36566
b0922	P60293
b0923	P22524
b1571	P0ACW8
b0326	P77393
b0327	P75692
b0324	P77554
b0325	P75691
b4663	C1P605
b0323	P77624
b0320	P77187
b0321	P77221
b3984	P0A7L0
b0328	P75693
b0329	P75694
b4465	P52048
b3327	P41441
b4467	P52074
b4466	P0CK95
b4461	P37908
b4460	P0AE26
b4463	Q46911
b3326	P45759
b1577	Q47138
b4469	Q46861
b3893	P0AAJ5
b3279	P0A9W9
b1578	P0CF60
b3892	P0AEL0
b3895	P32177
b1847	P33219
b3894	P32176
b3488	P37627
b3320	P60438
b4206	P39310
b0542	P75718
b2540	P0ABW0
b2541	P0CI31
b2836	P31119
b3880	P32140
b2542	P77650
b1776	P77539
b2543	P0AD47
b1777	P76231
b2544	P76584
b4209	P69506
b2545	P77360
b2546	P77315
b2547	P77509
b4669	C1P619
b2878	Q46811
b3569	P0ACI3
b3568	P0AGI4
b3565	P00944
b3564	P09099
b3567	P37388
b3566	P37387
b3561	P37669
b3560	P00960
b3563	P11286
b3562	P0ADJ8
b4506	Q2EEQ2
b3941	P0AEZ1
b1470	P76122
b2052	P32055
b4504	Q9XB42
b3161	P0AAD2
b3160	P0ADV5
b3163	P0AFB1
b3162	P0A9P6
b3165	P0ADZ4
b3164	P05055
b3167	P0A7G2
b3166	P60340
b3169	P0AFF6
b3168	P0A705
b4503	Q2EEP9
b1778	P0A746
b1779	P0A9B2
b3309	P60624
b3308	P62399
b3301	P02413
b3300	P0AGA2
b3303	P0A7W1
b3302	P0AG51
b3305	P0AG55
b3304	P0C018
b3307	P0AG59
b3306	P0A7W7
b1840	P76278
b4329	P0AEH8
b2364	P46068
b2365	P08555
b2366	P00926
b2367	P52600
b2360	P76513
b2361	P76514
b2362	P76515
b2363	P76516
b2368	P52599
b2369	P0ACZ4
b2837	P03024
b3769	P0ADG1
b3766	P62522
b3765	P22787
b3764	P0ADN2
b3415	P39835
b3414	P63020
b3417	P00490
b3416	P15977
b2148	P23200
b2149	P0AAG8
b2418	P40191
b2419	Q47702
b2144	P0AFY2
b2145	P64536
b2146	P76440
b2147	P25889
b2140	P33371
b2141	P60632
b2142	P0AD19
b2143	P0ABF6
b3785	P0AG00
b3784	P0AC78
b3787	P27829
b3786	P27828
b3781	P0AA25
b3780	P0A8J8
b2968	Q46832
b3782	P0ADF3
b2966	Q46831
b2964	P0AFF4
b2965	P21169
b2962	P0A8P3
b2963	P0C066
b2960	P0A8I5
b2961	P17802
b2092	P69831
b2093	P37188
b2091	P0A9S3
b2096	P0C8J6
b2097	P0A991
b2094	P69828
b2095	P0C8J8
b2098	P76417
b2099	P76418
b4180	P63177
b2562	P52102
b2563	P24224
b2560	P0AD42
b2561	P37767
b2566	P06616
b2567	P0A7Y0
b2564	P0A794
b2565	P0A7H3
b4186	P33222
b2568	P00803
b2569	P60785
b3720	P26218
b4187	P33224
b1452	P76116
b1482	P0C0L2
b1068	P75931
b1069	P0AF16
b1066	P0A948
b1067	P29217
b1064	P0AC59
b1065	P69367
b1062	P05020
b1063	P0AB26
b1060	P0AB33
b1061	P0ABR1
b1992	P36561
b1993	P0AE76
b1990	P39176
b1991	P36562
b1996	P0CF55
b1997	P0CF42
b1994	P0CE53
b1999	P76359
b4188	P0AF82
b2898	P0ADE8
b2899	P67153
b4522	P0CB62
b2892	P21893
b1488	P77790
b0426	P0A8E7
b2891	P07012
b2896	Q46824
b2897	P64559
b2894	P0A8P8
b1489	P76129
b2788	Q46915
b2789	Q46916
b2786	P0AEC5
b2787	P0AES2
b2784	P0AG20
b2785	P55135
b2782	P0AE70
b2783	P0AE72
b2780	P0A7E5
b2781	P0AEY3
b4322	P24215
b0425	P0A9J4
b1208	P62615
b1209	P61320
b4326	P39375
b4327	P39376
b4324	P39161
b0424	Q46948
b1202	P76017
b1203	P0ABU2
b1200	P76015
b1201	P76016
b1206	P0AFR2
b1207	P0A717
b1204	P0A7D1
b1205	P0AB49
b1198	P37349
b1199	P76014
b3725	P0AAH0
b3981	P0AG96
b1192	P76008
b1193	P0C960
b1190	P29012
b1191	P76007
b1196	P76012
b1197	P13482
b1194	P76010
b1195	P76011
b0821	P75791
b0820	P0A9U3
b0823	P75793
b0822	P75792
b0825	P78055
b0824	P75794
b0420	P77488
b0826	P12282
b0829	P75796
b0828	P37595
b0422	P0A8G9
b1493	P69910
b2914	P0A7Z0
b1668	P77148
b1669	P77147
b1848	P0ACY9
b1849	P33221
b0297	P36943
b1660	P37597
b1661	P0A9H7
b1662	P0AFU8
b1663	P37340
b1664	P77552
b1841	P0AA57
b1842	P0ABS8
b1667	P0ACX3
b1440	P76108
b1441	P77795
b1442	P77156
b1443	P0AFR9
b1444	P77674
b1445	P64453
b1446	P64455
b1447	P76111
b1448	P76112
b1449	P76113
b0131	P0A790
b0130	P31666
b0137	P37017
b0136	P37016
b1338	P77357
b1339	P77744
b1686	P77781
b1687	P77748
b1684	P77667
b1685	P64476
b1682	P77499
b1683	P77522
b1680	P77444
b1681	P77689
b4086	P32720
b4257	P39338
b4254	P04391
b4255	P0AF90
b4156	P39282
b4253	P39336
b1688	P0AFS7
b1689	P76196
b4003	P14377
b0194	P16659
b4001	P32681
b1506	P76138
b0629	P30979
b0628	P60716
b0627	P0A843
b1501	P77561
b4151	P0A8Q3
b0624	P37002
b0623	P0A972
b0622	P37001
b0621	P0ABP3
b0620	P0AEF4
b0007	P30143
b0006	P0A8I3
b0005	P75616
b0004	P00934
b0003	P00547
b0002	P00561
b0553	P21420
b0552	P0CE50
b0192	P40710
b0559	P64435
b0558	P77598
b0009	P0AF03
b0008	P0A870
b4078	P0AF56
b4079	P07658
b1538	P24171
b1539	P39831
b1534	P31126
b1535	P31129
b1536	P31130
b1537	P31131
b1530	P27245
b1531	P0ACH5
b1532	P31121
b1533	P31125
b4528	P58042
b0198	P31547
b0959	P75869
b0958	P0AFZ5
b0489	P0AA53
b0488	P0AAS3
b4390	P27278
b1921	P52627
b0483	P0A9T6
b0482	P77301
b0481	P0AAR3
b0480	P07024
b0487	P0A9G4
b0486	P77400
b0485	P77454
b0484	Q59385
b4277	P39351
b1492	P63235
b2846	Q46941
b4305	P39366
b0313	P17446
b0312	P17445
b0311	P17444
b0310	P77180
b0317	P77219
b0316	P77700
b0315	P21514
b0314	P0ABC9
b4678	C1P606
b4679	C1P609
b0319	P77297
b0318	P77736
b3512	P63204
b4476	P0AC96
b4477	Q6BF16
b4474	P45541
b3513	P37636
b4472	P46474
b4473	P30852
b4470	P42626
b4471	P42630
b3514	P37637
b4478	Q6BF17
b3515	P63201
b3516	P37639
b3517	P69908
b4271	P39347
b3266	P24181
b3267	P64622
b3264	P0ACT2
b2648	P76611
b4272	P0CF45
b0450	P0AC55
b0451	P69681
b0452	P0AGG2
b2719	P16433
b0453	P77717
b2642	P52138
b0454	P0AFP2
b4273	P0CF58
b0900	P75836
b3578	P37675
b3579	P37676
b3576	P37673
b2647	P52143
b3574	P37671
b0901	P43340
b3572	P09053
b3573	P56256
b3570	P27297
b2646	Q46953
b3268	P45766
b3269	P45767
b3740	P0A6U5
b3172	P0A6E4
b3173	P42640
b3170	P0A8A8
b3176	P31120
b3177	P0AC13
b3175	P0AG99
b3178	P0AAI3
b3179	P0C0R7
b0115	P06959
b2617	P0A937
b3318	P0ADZ0
b3319	P60723
b3312	P0A7M6
b3313	P0ADY7
b3310	P0ADY3
b3311	P0AG63
b3316	P0A7U3
b3317	P60422
b3314	P0A7V3
b3315	P61175
b0705	P75741
b2311	P0AG03
b2310	P09551
b2313	P08550
b2312	P0AG16
b2315	P08192
b2314	P09549
b2317	P0ABP6
b2316	P0A9Q5
b2319	P08390
b2318	P07649
b3504	P37635
b1828	P76269
b3778	P09980
b3779	P25552
b1829	P23894
b3770	P0AB80
b3771	P05791
b3772	P04968
b3773	P05827
b3774	P05793
b3775	P0A9L5
b3406	P30128
b3407	P46837
b2429	P77272
b2428	P76535
b3402	P45804
b3403	P22259
b3400	P0ACG8
b3401	P0A6Y5
b2131	P33362
b2130	P33361
b2133	P06149
b2132	P33363
b2135	P0AD17
b2134	P0AFI5
b2137	P33368
b2136	P33366
b3716	P31468
b2959	P38521
b2958	P0ADS9
b3792	P0AAA7
b3793	P27835
b3790	P27832
b3791	P27833
b2953	P52060
b2952	P64564
b2951	P67080
b2950	P52052
b2957	P00805
b2956	P46142
b2955	P52062
b2954	P52061
b1826	P64512
b3717	P31469
b1827	P76268
b2229	P76466
b2559	P68398
b2558	P0AGC5
b2225	P76462
b2224	P76461
b2555	P0AD44
b2226	P76463
b2221	P76458
b2220	Q06065
b2223	P76460
b2222	P76459
b2045	P71242
b1707	P76204
b1059	P40874
b1058	P64442
b2041	P37759
b2040	P37760
b2043	P71244
b1706	P77649
b1053	P25744
b1051	P25738
b1050	P0AB31
b1057	P75925
b1056	P0A8X2
b1055	P24188
b1054	P0ACV0
b1704	P00887
b1703	P0A8A4
b2858	Q46793
b1319	P76045
b0658	P0AE78
b3605	P33232
b3540	P37313
b3715	P31467
b1252	P02929
b2423	P0AEB0
b4208	P0AAE0
b3381	P45550
b4319	P08190
b4318	P08189
b2406	P45562
b0652	P0AAG3
b4315	P39264
b3603	P33231
b4313	P0ADH7
b4312	P0ADH5
b4311	P69856
b0653	P0AER5
b1312	P77716
b4722	P0DPC6
b1313	P76043
b2422	P16676
b0832	P75799
b0833	P75800
b0830	P75797
b0831	P75798
b0836	P0AAY1
b0837	P75804
b0834	P75801
b0835	P0AEI4
b0838	P0ACA7
b0839	P08506
b3985	P0A7J3
b1839	P64506
b1838	P55798
b4396	P0ACI0
b1831	P45577
b1830	P23865
b1833	P0AD03
b1832	P76270
b1835	P76273
b1834	P76272
b1837	P76275
b1836	P64503
b1303	P37344
b1302	P50457
b1301	P37906
b1300	P23883
b1307	P0AFV8
b1306	P0AFN2
b1305	P0AFM9
b1304	P0AFM6
b3742	P03817
b1309	P76041
b1308	P23857
b3945	P0A9S5
b4269	P27250
b2802	P69922
b2854	Q46790
b4263	P39342
b3411	P31667
b4119	P06720
b4260	P68767
b4267	P39346
b4266	P0A9P9
b4265	P39344
b3410	P64638
b3711	P31463
b3413	P46846
b2806	P0ADR6
b0638	P52086
b0639	P0A752
b1235	P0AEV1
b1234	P0AFR0
b1233	P37052
b1232	P37051
b1943	P52614
b1942	P52613
b0630	P60720
b0631	P0A8J4
b0632	P0AEB2
b0633	P10100
b0634	P0ABG7
b0635	P0AD65
b0636	P0A8I8
b0637	P0AAT6
b0546	P77634
b0011	P75617
b0012	P28697
b0013	P28696
b0014	P0A6Y8
b0015	P08622
b0016	P0CF91
b0541	P0CF81
b0018	P33236
b0019	P13738
b2139	P33369
b0548	Q47270
b0549	P68661
b1549	P76156
b1548	P31061
b2410	P39836
b1541	P64463
b1540	P0ACM2
b1543	P77228
b1542	P77260
b1545	P77170
b1544	P76154
b1547	P77515
b1546	P76155
b0494	P0ADA1
b0495	P0A9T8
b0496	P77504
b0497	P16919
b0490	P77279
b0491	P77307
b0492	P77395
b0493	P0AFP4
b3511	P0AET5
b0498	P33668
b0499	P77759
b0124	P15877
b0125	P0A9M2
b0126	P61517
b0127	P36879
b0120	P0A7F6
b0121	P09158
b0122	P0AA95
b0123	P36649
b0942	P75859
b0943	P75860
b0940	P75857
b0941	P75858
b0946	P75862
b0947	P75863
b0944	P40876
b0945	P0A7E1
b3783	P0AG30
b3626	P27129
b2969	Q46833
b2850	Q46786
b2424	P16701
b0308	P77433
b4688	P0DPM8
b3865	P0A6P7
b0304	P77212
b0305	P77379
b0306	P77252
b0307	P77536
b0300	P77601
b0301	P75685
b3745	P0ADN0
b0303	P75687
b1956	P76330
b3627	P27128
b2697	P00957
b0723	P0AC41
b3789	P61887
b0720	P0ABH7
b3788	P27830
b1388	P76077
b0726	P0AFG3
b0727	P0AFG6
b3624	P27241
b0724	P07014
b1951	P0DMC9
b1383	P76076
b0899	P75835
b3708	P0A853
b0728	P0A836
b3625	P27240
b0729	P0AGE9
b4181	P0AF76
b3881	P32141
b3622	P27243
b3099	P64585
b3098	P64581
b3549	P05100
b3548	P37663
b4051	P28304
b3091	P42604
b3090	P42603
b3093	P0AA78
b3092	P0A8G3
b3095	P0AA63
b3094	P0ACL2
b3097	P42616
b3096	P42615
b4053	P0A6B4
b4054	P04693
b3623	P27242
b4055	P0AE22
b4056	P0AF48
b3149	P66817
b3148	P45465
b3147	P45464
b3146	P67087
b3145	P43319
b3144	P42915
b3143	P42914
b3142	P42913
b3141	P42912
b3140	P42911
b4058	P0A698
b3744	P00963
b3620	P37692
b4539	P69348
b3949	P32672
b3467	P37615
b3967	P22634
b4538	Q2EES3
b1873	P52005
b2302	P77526
b2303	P0AC19
b2300	P67095
b2301	P77544
b2306	P07109
b2307	P0AEU3
b2304	P77775
b2305	P77768
b2308	P52094
b2309	P0AEU0
b4155	P0A8N7
b3722	P08722
b4410	P0ADB4
b2944	P39902
b2945	P25736
b2128	P33359
b2129	P33360
b2940	P64570
b2941	P46879
b2942	P0A817
b2943	P0AEP1
b2122	P33353
b2123	P33354
b2120	P33349
b2121	P33352
b2126	P0AD14
b2127	P33358
b2124	P33355
b2125	P0AFT5
b4110	P39267
b4113	P30843
b4112	P30844
b3710	P31462
b2548	P77269
b2549	P76585
b3325	P45758
b3324	P45757
b3323	P45756
b3322	P03825
b3321	P0A7R5
b2239	P09394
b2236	P0ABW3
b2237	P27294
b2234	P00452
b2235	P69924
b2232	P17993
b2233	P45508
b2230	P17994
b2231	P0AES4
b2056	P71238
b2057	P71237
b2054	P0ACD2
b2055	P71239
b1583	P76170
b2053	P0AC88
b2050	P32057
b2051	P32056
b2058	P0ACC9
b2059	P77414
b3654	P0AGM9
b3959	P0A6C8
b1582	P76169
b3753	P0ACQ0
b1788	P76239
b2434	P76539
b2435	P36548
b2436	P36553
b2437	P36547
b2430	P77619
b2431	P76536
b2432	P76537
b2433	P76538
b3707	P0AD89
b3653	P0AER8
b2438	P76540
b2439	P76541
b0139	P33129
b4309	P39370
b4154	P00363
b3820	P0ADP2
b3750	P0AGI1
b4300	P39361
b4301	P39362
b4302	P39363
b4303	P39364
b4304	P39365
b3585	P37682
b4306	P39367
b4307	P39368
b4411	P0ADB7
b4219	P0A744
b3575	P37672
b3706	P25522
b3652	P24230
b0138	P37018
b3822	P15043
b3821	P0A921
b3751	P02925
b0809	P10346
b0808	P75783
b0807	P75782
b0806	P0AAX6
b0805	P75780
b0804	P75779
b0803	P41039
b0802	P0AAX3
b0801	P30178
b0800	P30177
b1044	P75917
b1045	P0A8D6
b1046	P75919
b1047	P75920
b1040	P52106
b1041	P0ABK7
b1042	P28307
b1043	P52107
b1822	P36999
b1823	P0A9Y6
b1820	P67601
b1821	P76264
b1048	P33136
b1049	P62517
b1824	P64508
b1825	P64499
b0797	P25888
b0796	P0ACU0
b0795	P75777
b0794	P0A9U1
b0793	P0AFQ2
b0792	P0AFP9
b0791	P0AAW5
b0790	P0AAW1
b1314	P76044
b1315	P77503
b1316	P77154
b1317	P77366
b1310	P76042
b1311	P0AFR7
b0799	P27296
b0798	P30176
b3700	P0A7H0
b2825	P08371
b3621	P24173
b3823	P0AG38
b2414	P0ABK5
b4515	P56100
b1220	P39165
b1221	P0AF28
b1222	P0AFA2
b1223	P10903
b1224	P09152
b1225	P11349
b1226	P0AF26
b1227	P11350
b1228	P76023
b1229	P02338
b4088	P39265
b2890	P0A8N3
b1958	P46125
b1959	P0AA70
b0573	P77214
b0572	P77211
b0571	P0ACZ8
b0570	P77485
b0577	P0AAT4
b0576	P24207
b0575	P38054
b0574	P77239
b2415	P0AA04
b4059	P0AGE0
b0579	P0AAT2
b0578	P38489
b1508	P23873
b4268	P39208
b1558	P0A976
b1559	P76161
b1552	P0A986
b1553	P76158
b1550	P77695
b1551	P76157
b1556	P77237
b1557	P36995
b1554	P76159
b1555	P76160
b0977	P19932
b0976	P19931
b0975	P19930
b0974	P0AAM1
b0973	P0ACD8
b0972	P69739
b2412	P77173
b0970	P0AAC6
b0979	P26458
b0978	P26459
b0151	P07821
b0150	P06971
b0153	P06972
b0152	P07822
b0155	P37019
b0154	P23893
b0157	P0AFP0
b0156	P0ACC3
b0159	P0AF12
b0158	P37028
b3826	P27848
b2413	P0A6J3
b4064	P0AF52
b0379	P0AAP7
b0378	P77562
b3506	P37194
b3827	P0ADP5
b0373	P0CF67
b0372	P0CF80
b0375	P0AAP5
b0377	P0AFY6
b0376	P0AD70
b4025	P0A6T1
b4024	P08660
b4455	P37305
b4027	P32687
b4453	Q6BF25
b4026	P0AF45
b3828	P0A9F9
b4021	P0A7C6
b4020	P0AF43
b2411	P15042
b3891	P13024
b4023	P32685
b4323	P39160
b4022	P32684
b2468	P37127
b4083	P32717
b4696	P32051
b0207	P30863
b4321	P0AC94
b3829	P25665
b0200	P63228
b0209	P0A8U2
b0208	P30864
b3890	P0AFU6
b2610	P0AGD7
b3647	P25772
b4325	P39374
b4082	P32716
b3637	P0A7M2
b3531	P37651
b4328	P39377
b3947	P32670
b3088	P42601
b3089	P0AGE4
b4262	P0ADC6
b3534	P37655
b2611	P64432
b3082	P67701
b3083	P64578
b3080	P42592
b3081	P42593
b3086	P42598
b3087	P42599
b3084	P42596
b3085	P42597
b3329	P41443
b3946	P32669
b3538	P37659
b3158	P45527
b3159	P45475
b4261	P0AF98
b3100	Q47710
b3150	P64596
b3151	P45468
b3152	P45469
b3153	P45470
b3154	P67762
b3155	P45472
b3156	P63417
b3157	P64599
b4071	P0ABL1
b2823	P08372
b2527	P0A6L9
b4686	C1P620
b4087	P32721
b3944	P32668
b2524	P0C0L9
b2614	P09372
b2339	P77288
b2336	P77599
b2335	P76501
b2334	P76500
b2333	P76499
b2332	P76498
b2331	P0A8B2
b2330	P39199
b3554	P0ADK0
b2917	P27253
b3556	P0A9X9
b3557	P19768
b3550	P37664
b0948	P75864
b3552	P37665
b2916	P0A8S1
b3558	P19769
b3440	P46853
b2525	P0A9R4
b2687	P45578
b1927	P26612
b2685	P27303
b2684	P0ACR9
b2683	P43667
b2682	P76630
b2937	P60651
b1926	P0ABY2
b2939	P64567
b2913	P0A9T0
b3426	P13035
b3427	P76692
b1925	P26608
b2689	P0ADR0
b2688	P0A6W9
b1924	P24216
b3942	P13029
b3444	P0CF12
b1923	P04949
b2910	P0ADS2
b2522	P0AFZ1
b2616	P05824
b1922	P0AEM6
b3693	P31459
b4084	P32718
b0827	P12281
b1920	P0AEM9
b3328	P41442
b3330	P45760
b3331	P45761
b2209	P23827
b2208	P0AAL0
b3334	P36678
b3335	P25960
b3336	P0ABD3
b3337	P0AE56
b2203	P0ABL3
b2202	P0ABL5
b2201	P33931
b2200	P0ABL8
b2207	P0A9I5
b2206	P33937
b2205	P0AAL3
b2204	P33934
b2063	P76389
b2062	P0A930
b2061	P0AAB2
b2060	P76387
b2067	P38097
b2066	P0A8F4
b2065	P28248
b2064	P28249
b4076	P32712
b2069	P36928
b2068	P04395
b2593	P33644
b2592	P63284
b2597	P0AD49
b2848	Q46943
b2595	P0AC02
b2594	P33643
b2520	P76578
b2844	Q46939
b2599	P0A9J8
b2598	P0AD72
b2841	P0AE24
b2840	P03813
b2843	Q46938
b2842	P37769
b3698	P09996
b2441	P0AEJ6
b2440	P19636
b2115	P33345
b2114	P00959
b2113	P0AF08
b2112	P33344
b2111	P33343
b2110	P33342
b2449	P76549
b2448	P76548
b3994	P30136
b2119	P33348
b2118	P33346
b4509	Q47272
b1149	P75978
b1148	P75977
b3439	P46852
b1145	P75974
b1144	P75973
b1147	P75976
b1146	P75975
b1141	P75970
b1140	P75969
b1143	P75972
b1142	P75971
b1844	P0AEK0
b1845	P24555
b3995	P0AFX4
b1846	P33218
b0818	P75788
b0819	P0AAX8
b1815	P76261
b1814	P16095
b1813	P43337
b1812	P05041
b1811	P67338
b1810	P64490
b0810	P0AEQ6
b0811	P0AEQ3
b0812	P0ABT2
b0813	P0AA67
b0814	P0A917
b0815	P75785
b1819	P69805
b0817	P0A9F1
b1033	P75913
b1035	P75915
b1034	P75914
b1037	P0AEA2
b1036	P75916
b1039	P0AE95
b1038	P0AE98
b1843	P76280
b0780	P75767
b1368	P77658
b0782	P0AEZ9
b0783	P0A738
[truncated: 2,317 more rows]

## Sheet: 002B-bioassemblyPDB
	pdb_entry	assembly_id	entity_stoich	oligomeric_details	oligomeric_count	method_details	details
0	6ICC	6icc-assembly1.cif	{'ent_3': 1, 'ent_2': 1, 'ent_1': 1}	trimeric	3	PISA	author_and_software_defined_assembly
1	6ICA	6ica-assembly1.cif	{'ent_1': 1}	monomeric	1	PISA	author_and_software_defined_assembly
2	6ICA	6ica-assembly2.cif	{'ent_1': 1}	monomeric	1	PISA	author_and_software_defined_assembly
3	6ICA	6ica-assembly3.cif	{'ent_1': 1}	monomeric	1	PISA	author_and_software_defined_assembly
4	6ICF	6icf-assembly1.cif	{'ent_3': 1, 'ent_2': 1, 'ent_1': 1}	trimeric	3	PISA	author_and_software_defined_assembly
5	3CGZ	3cgz-assembly1.cif	{'ent_1': 1}	monomeric	1	PISA	software_defined_assembly
6	3CGZ	3cgz-assembly2.cif	{'ent_1': 1}	monomeric	1	PISA	software_defined_assembly
7	3CGZ	3cgz-assembly3.cif	{'ent_1': 1}	monomeric	1	PISA	software_defined_assembly
8	6ICD	6icd-assembly1.cif	{'ent_1': 2}	dimeric	2	PISA,PQS	author_and_software_defined_assembly
9	6PUA	6pua-assembly1.cif	{'ent_1': 3}	trimeric	3	PISA	author_and_software_defined_assembly
10	6PUB	6pub-assembly1.cif	{'ent_1': 3}	trimeric	3	PISA	author_and_software_defined_assembly
11	3CGN	3cgn-assembly1.cif	{'ent_1': 1}	monomeric	1	?	author_defined_assembly
12	3CGN	3cgn-assembly2.cif	{'ent_1': 2}	dimeric	2	PISA	software_defined_assembly
13	3CGM	3cgm-assembly1.cif	{'ent_1': 1}	monomeric	1	?	author_defined_assembly
14	3CGM	3cgm-assembly2.cif	{'ent_1': 6}	hexameric	6	PISA	software_defined_assembly
15	7F7M	7f7m-assembly1.cif	{'ent_1': 1}	monomeric	1	PISA	author_and_software_defined_assembly
16	7F7M	7f7m-assembly2.cif	{'ent_1': 1}	monomeric	1	PISA	author_and_software_defined_assembly
17	7F7J	7f7j-assembly1.cif	{'ent_1': 2}	dimeric	2	PISA	author_and_software_defined_assembly
18	7F7K	7f7k-assembly1.cif	{'ent_1': 1}	monomeric	1	PISA	author_and_software_defined_assembly
19	7F7K	7f7k-assembly2.cif	{'ent_1': 1}	monomeric	1	PISA	author_and_software_defined_assembly
20	3CGI	3cgi-assembly1.cif	{'ent_1': 6}	hexameric	6	PISA	author_and_software_defined_assembly
21	3CGI	3cgi-assembly2.cif	{'ent_1': 6}	hexameric	6	PISA	author_and_software_defined_assembly
22	3CGI	3cgi-assembly3.cif	{'ent_1': 12}	dodecameric	12	PISA	software_defined_assembly
23	6ICZ	6icz-assembly1.cif	{'ent_31': 2, 'ent_29': 2, 'ent_30': 2, 'ent_20': 1, 'ent_32': 2, 'ent_9': 1, 'ent_21': 1, 'ent_34': 2, 'ent_3': 1, 'ent_2': 1, 'ent_1': 1, 'ent_7': 1, 'ent_6': 1, 'ent_5': 1, 'ent_4': 1, 'ent_22': 1, 'ent_23': 1, 'ent_19': 1, 'ent_18': 1, 'ent_26': 1, 'ent_27': 1, 'ent_24': 1, 'ent_25': 1, 'ent_13': 1, 'ent_12': 1, 'ent_11': 1, 'ent_10': 1, 'ent_17': 1, 'ent_16': 1, 'ent_15': 1, 'ent_14': 1, 'en…	51-meric	51	?	author_defined_assembly
24	7F7G	7f7g-assembly1.cif	{'ent_2': 1, 'ent_1': 1}	dimeric	2	PISA	author_and_software_defined_assembly
25	7F7G	7f7g-assembly2.cif	{'ent_2': 1, 'ent_1': 1}	dimeric	2	PISA	author_and_software_defined_assembly
26	6EBQ	6ebq-assembly1.cif	{'ent_1': 2}	dimeric	2	PISA	author_and_software_defined_assembly
27	3TEA	3tea-assembly1.cif	{'ent_1': 4}	tetrameric	4	PISA	author_and_software_defined_assembly
28	3TEF	3tef-assembly1.cif	{'ent_1': 1}	monomeric	1	PISA	author_and_software_defined_assembly
29	3CGY	3cgy-assembly1.cif	{'ent_1': 1}	monomeric	1	PISA	software_defined_assembly
30	3CGY	3cgy-assembly2.cif	{'ent_1': 1}	monomeric	1	PISA	software_defined_assembly
31	3CGY	3cgy-assembly3.cif	{'ent_1': 1}	monomeric	1	PISA	software_defined_assembly
32	5TXI	5txi-assembly1.cif	{'ent_1': 1}	monomeric	1	PISA	author_and_software_defined_assembly
33	5TXI	5txi-assembly2.cif	{'ent_1': 1}	monomeric	1	PISA	author_and_software_defined_assembly
34	3TEE	3tee-assembly1.cif	{'ent_1': 1}	monomeric	1	?	author_defined_assembly
35	3TEJ	3tej-assembly1.cif	{'ent_1': 1}	monomeric	1	PISA	author_and_software_defined_assembly
36	3TEJ	3tej-assembly2.cif	{'ent_1': 1}	monomeric	1	PISA	author_and_software_defined_assembly
37	3TEH	3teh-assembly1.cif	{'ent_2': 2, 'ent_1': 2}	tetrameric	4	PISA	author_and_software_defined_assembly
38	8EGL	8egl-assembly1.cif	{'ent_1': 6}	hexameric	6	?	author_defined_assembly
39	8EGL	8egl-assembly2.cif	{'ent_1': 6}	hexameric	6	?	author_defined_assembly
40	3VPA	3vpa-assembly1.cif	{'ent_1': 1}	monomeric	1	?	author_defined_assembly
41	3VPA	3vpa-assembly2.cif	{'ent_1': 1}	monomeric	1	?	author_defined_assembly
42	3VPA	3vpa-assembly3.cif	{'ent_1': 1}	monomeric	1	?	author_defined_assembly
43	3VPA	3vpa-assembly4.cif	{'ent_1': 1}	monomeric	1	?	author_defined_assembly
44	3TEM	3tem-assembly1.cif	{'ent_1': 2}	dimeric	2	PISA	author_and_software_defined_assembly
45	7W6W	7w6w-assembly1.cif	{'ent_1': 2}	dimeric	2	PISA	author_and_software_defined_assembly
46	7W6W	7w6w-assembly2.cif	{'ent_1': 2}	dimeric	2	PISA	author_and_software_defined_assembly
47	3TEV	3tev-assembly1.cif	{'ent_1': 1}	monomeric	1	PISA	author_and_software_defined_assembly
48	3TEV	3tev-assembly2.cif	{'ent_1': 1}	monomeric	1	PISA	author_and_software_defined_assembly
49	5TXW	5txw-assembly1.cif	{'ent_1': 2}	dimeric	2	PISA	author_and_software_defined_assembly
50	5TXW	5txw-assembly2.cif	{'ent_1': 2}	dimeric	2	PISA	author_and_software_defined_assembly
51	5TXV	5txv-assembly1.cif	{'ent_1': 6}	hexameric	6	PISA	author_and_software_defined_assembly
52	5TXV	5txv-assembly2.cif	{'ent_1': 6}	hexameric	6	PISA	author_and_software_defined_assembly
53	5TXV	5txv-assembly3.cif	{'ent_1': 6}	hexameric	6	PISA	author_and_software_defined_assembly
54	5TXV	5txv-assembly4.cif	{'ent_1': 6}	hexameric	6	PISA	author_and_software_defined_assembly
55	5TXQ	5txq-assembly1.cif	{'ent_1': 2}	dimeric	2	PISA	author_and_software_defined_assembly
56	6EBT	6ebt-assembly1.cif	{'ent_1': 4}	tetrameric	4	PISA	author_and_software_defined_assembly
57	1MWT	1mwt-assembly1.cif	{'ent_1': 1}	monomeric	1	?	author_defined_assembly
58	1MWT	1mwt-assembly2.cif	{'ent_1': 1}	monomeric	1	?	author_defined_assembly
59	3TE2	3te2-assembly1.cif	{'ent_1': 5}	pentameric	5	PISA	author_and_software_defined_assembly
60	5OWI	5owi-assembly1.cif	{'ent_1': 2}	dimeric	2	PISA	author_and_software_defined_assembly
61	3TE0	3te0-assembly1.cif	{'ent_1': 5}	pentameric	5	PISA	author_and_software_defined_assembly
62	3TE1	3te1-assembly1.cif	{'ent_1': 5}	pentameric	5	PISA	author_and_software_defined_assembly
63	3TE7	3te7-assembly1.cif	{'ent_1': 2}	dimeric	2	PISA	author_and_software_defined_assembly
64	5TX9	5tx9-assembly1.cif	{'ent_1': 1}	monomeric	1	PISA	author_and_software_defined_assembly
65	5TX9	5tx9-assembly2.cif	{'ent_1': 1}	monomeric	1	PISA	author_and_software_defined_assembly
66	5TX7	5tx7-assembly1.cif	{'ent_1': 2}	dimeric	2	PISA	author_and_software_defined_assembly
67	3TE9	3te9-assembly1.cif	{'ent_1': 1}	monomeric	1	?	author_defined_assembly
68	3TE9	3te9-assembly2.cif	{'ent_1': 1}	monomeric	1	?	author_defined_assembly
69	3TE9	3te9-assembly3.cif	{'ent_1': 2}	dimeric	2	PISA	software_defined_assembly
70	1DIZ	1diz-assembly1.cif	{'ent_3': 1, 'ent_2': 1, 'ent_1': 1}	trimeric	3	?	author_defined_assembly
71	1DIZ	1diz-assembly2.cif	{'ent_3': 1, 'ent_2': 1, 'ent_1': 1}	trimeric	3	?	author_defined_assembly
72	5OWJ	5owj-assembly1.cif	{'ent_1': 2}	dimeric	2	PISA	author_and_software_defined_assembly
73	7F79	7f79-assembly1.cif	{'ent_1': 6}	hexameric	6	PISA	author_and_software_defined_assembly
74	7F76	7f76-assembly1.cif	{'ent_1': 2}	dimeric	2	PISA	author_and_software_defined_assembly
75	7F77	7f77-assembly1.cif	{'ent_1': 6}	hexameric	6	?	author_defined_assembly
76	7F75	7f75-assembly1.cif	{'ent_9': 1, 'ent_8': 1, 'ent_3': 1, 'ent_2': 1, 'ent_1': 3, 'ent_10': 1, 'ent_7': 1, 'ent_6': 1, 'ent_5': 1, 'ent_4': 1}	dodecameric	12	?	author_defined_assembly
77	7F7L	7f7l-assembly1.cif	{'ent_1': 1}	monomeric	1	PISA	author_and_software_defined_assembly
78	7F7L	7f7l-assembly2.cif	{'ent_1': 1}	monomeric	1	PISA	author_and_software_defined_assembly
79	6PU9	6pu9-assembly1.cif	{'ent_1': 3}	trimeric	3	PISA	author_and_software_defined_assembly
80	6IC4	6ic4-assembly1.cif	{'ent_3': 2, 'ent_2': 2, 'ent_1': 6, 'ent_4': 2}	dodecameric	12	PISA	author_and_software_defined_assembly
81	6PU3	6pu3-assembly1.cif	{'ent_2': 746, 'ent_1': 1}	monomeric	1	?	author_defined_assembly
82	6PU3	6pu3-assembly2.cif	{'ent_2': 1, 'ent_1': 1}	dimeric	2	PISA	software_defined_assembly
83	1BU6	1bu6-assembly1.cif	{'ent_1': 4}	tetrameric	4	PISA	author_and_software_defined_assembly
84	1BU6	1bu6-assembly2.cif	{'ent_1': 2}	dimeric	2	PQS	software_defined_assembly
85	1BU6	1bu6-assembly3.cif	{'ent_1': 2}	dimeric	2	PQS	software_defined_assembly
86	6NCR	6ncr-assembly1.cif	{'ent_1': 1}	monomeric	1	?	author_defined_assembly
87	6NCR	6ncr-assembly2.cif	{'ent_1': 1}	monomeric	1	?	author_defined_assembly
88	6NCR	6ncr-assembly3.cif	{'ent_1': 2}	dimeric	2	PISA	software_defined_assembly
89	4FFX	4ffx-assembly1.cif	{'ent_1': 4}	tetrameric	4	PISA	author_and_software_defined_assembly
90	4FFS	4ffs-assembly1.cif	{'ent_1': 2}	dimeric	2	PISA	author_and_software_defined_assembly
91	3VP0	3vp0-assembly1.cif	{'ent_1': 4}	tetrameric	4	PISA	author_and_software_defined_assembly
92	4FFJ	4ffj-assembly1.cif	{'ent_1': 2}	dimeric	2	PISA	author_and_software_defined_assembly
93	4FFJ	4ffj-assembly2.cif	{'ent_1': 2}	dimeric	2	PISA	author_and_software_defined_assembly
94	4FFD	4ffd-assembly1.cif	{'ent_1': 1}	monomeric	1	PISA	author_and_software_defined_assembly
95	4HGO	4hgo-assembly1.cif	{'ent_1': 4}	tetrameric	4	PISA	author_and_software_defined_assembly
96	4FFA	4ffa-assembly1.cif	{'ent_1': 4}	tetrameric	4	PISA	software_defined_assembly
97	4FFC	4ffc-assembly1.cif	{'ent_1': 4}	tetrameric	4	PISA	author_and_software_defined_assembly
98	1QHO	1qho-assembly1.cif	{'ent_1': 1}	monomeric	1	?	author_defined_assembly
99	1QHL	1qhl-assembly1.cif	{'ent_1': 1}	monomeric	1	?	author_defined_assembly
100	1QHM	1qhm-assembly1.cif	{'ent_1': 2}	dimeric	2	PISA	author_and_software_defined_assembly
101	3M1G	3m1g-assembly1.cif	{'ent_1': 2}	dimeric	2	PISA	author_and_software_defined_assembly
102	3M1G	3m1g-assembly2.cif	{'ent_1': 2}	dimeric	2	PISA	author_and_software_defined_assembly
103	3M1E	3m1e-assembly1.cif	{'ent_1': 2}	dimeric	2	PISA	author_and_software_defined_assembly
104	6NTE	6nte-assembly1.cif	{'ent_1': 1}	monomeric	1	?	author_defined_assembly
105	6NTE	6nte-assembly2.cif	{'ent_1': 1}	monomeric	1	?	author_defined_assembly
106	4QFO	4qfo-assembly1.cif	{'ent_1': 1}	monomeric	1	?	author_defined_assembly
107	4QFO	4qfo-assembly2.cif	{'ent_1': 1}	monomeric	1	?	author_defined_assembly
108	4QFO	4qfo-assembly3.cif	{'ent_1': 2}	dimeric	2	PISA	software_defined_assembly
109	4QFN	4qfn-assembly1.cif	{'ent_1': 1}	monomeric	1	PISA	author_and_software_defined_assembly
110	4QFN	4qfn-assembly2.cif	{'ent_1': 1}	monomeric	1	PISA	author_and_software_defined_assembly
111	1QHE	1qhe-assembly1.cif	{'ent_1': 1}	monomeric	1	?	author_defined_assembly
112	4QFK	4qfk-assembly1.cif	{'ent_1': 1}	monomeric	1	PISA	author_and_software_defined_assembly
113	4QFK	4qfk-assembly2.cif	{'ent_1': 1}	monomeric	1	PISA	author_and_software_defined_assembly
114	4QFK	4qfk-assembly3.cif	{'ent_1': 1}	monomeric	1	PISA	author_and_software_defined_assembly
115	4QFK	4qfk-assembly4.cif	{'ent_1': 1}	monomeric	1	PISA	author_and_software_defined_assembly
116	4QFK	4qfk-assembly5.cif	{'ent_1': 1}	monomeric	1	PISA	author_and_software_defined_assembly
117	4QFK	4qfk-assembly6.cif	{'ent_1': 1}	monomeric	1	PISA	author_and_software_defined_assembly
118	4QFK	4qfk-assembly7.cif	{'ent_1': 1}	monomeric	1	PISA	author_and_software_defined_assembly
119	4QFK	4qfk-assembly8.cif	{'ent_1': 1}	monomeric	1	PISA	author_and_software_defined_assembly
120	4QFH	4qfh-assembly1.cif	{'ent_1': 2}	dimeric	2	PISA	software_defined_assembly
121	1ZTY	1zty-assembly1.cif	{'ent_1': 1}	monomeric	1	?	author_defined_assembly
122	12AS	12as-assembly1.cif	{'ent_1': 2}	dimeric	2	PISA	author_and_software_defined_assembly
123	3M1P	3m1p-assembly1.cif	{'ent_1': 4}	tetrameric	4	PISA	author_and_software_defined_assembly
124	2NQQ	2nqq-assembly1.cif	{'ent_1': 2}	dimeric	2	PISA	author_and_software_defined_assembly
125	2NQQ	2nqq-assembly2.cif	{'ent_1': 2}	dimeric	2	PISA	author_and_software_defined_assembly
126	4QFP	4qfp-assembly1.cif	{'ent_1': 1}	monomeric	1	PISA	author_and_software_defined_assembly
127	4QFP	4qfp-assembly2.cif	{'ent_1': 1}	monomeric	1	PISA	author_and_software_defined_assembly
128	3M1Y	3m1y-assembly1.cif	{'ent_1': 2}	dimeric	2	PISA	author_and_software_defined_assembly
129	3M1Y	3m1y-assembly2.cif	{'ent_1': 2}	dimeric	2	PISA	author_and_software_defined_assembly
130	2I22	2i22-assembly1.cif	{'ent_1': 2}	dimeric	2	?	author_defined_assembly
131	2I22	2i22-assembly2.cif	{'ent_1': 2}	dimeric	2	?	author_defined_assembly
132	1QHP	1qhp-assembly1.cif	{'ent_1': 1}	monomeric	1	?	author_defined_assembly
133	1ZTV	1ztv-assembly1.cif	{'ent_1': 2}	dimeric	2	?	author_defined_assembly
134	2I2A	2i2a-assembly1.cif	{'ent_1': 4}	tetrameric	4	PISA,PQS	author_and_software_defined_assembly
135	2I2C	2i2c-assembly1.cif	{'ent_1': 4}	tetrameric	4	PISA,PQS	author_and_software_defined_assembly
136	2I2B	2i2b-assembly1.cif	{'ent_1': 4}	tetrameric	4	?	author_defined_assembly
137	2I2D	2i2d-assembly1.cif	{'ent_1': 4}	tetrameric	4	?	author_defined_assembly
138	1ZT9	1zt9-assembly1.cif	{'ent_1': 2}	dimeric	2	PISA	author_and_software_defined_assembly
139	1ZT9	1zt9-assembly2.cif	{'ent_1': 2}	dimeric	2	PISA	author_and_software_defined_assembly
140	1ZT9	1zt9-assembly3.cif	{'ent_1': 4}	tetrameric	4	PISA	software_defined_assembly
141	1ZT9	1zt9-assembly4.cif	{'ent_1': 4}	tetrameric	4	PISA	software_defined_assembly
142	1ZT9	1zt9-assembly5.cif	{'ent_1': 4}	tetrameric	4	PISA	software_defined_assembly
143	4QF6	4qf6-assembly1.cif	{'ent_1': 4}	tetrameric	4	PISA	author_and_software_defined_assembly
144	4QF6	4qf6-assembly2.cif	{'ent_1': 4}	tetrameric	4	PISA	author_and_software_defined_assembly
145	4QF6	4qf6-assembly3.cif	{'ent_1': 4}	tetrameric	4	PISA	author_and_software_defined_assembly
146	4QF5	4qf5-assembly1.cif	{'ent_1': 1}	monomeric	1	PISA	author_and_software_defined_assembly
147	4QF5	4qf5-assembly2.cif	{'ent_1': 1}	monomeric	1	PISA	author_and_software_defined_assembly
148	3M16	3m16-assembly1.cif	{'ent_1': 2}	dimeric	2	PISA	author_and_software_defined_assembly
149	1QH9	1qh9-assembly1.cif	{'ent_1': 2}	dimeric	2	PISA,PQS	author_and_software_defined_assembly
150	1LGR	1lgr-assembly1.cif	{'ent_1': 12}	dodecameric	12	PISA	author_and_software_defined_assembly
151	1QH5	1qh5-assembly1.cif	{'ent_1': 2}	dimeric	2	?	author_defined_assembly
152	1QH3	1qh3-assembly1.cif	{'ent_1': 2}	dimeric	2	?	author_defined_assembly
153	2I2W	2i2w-assembly1.cif	{'ent_1': 2}	dimeric	2	PISA,PQS	author_and_software_defined_assembly
154	2I2W	2i2w-assembly2.cif	{'ent_1': 2}	dimeric	2	PISA,PQS	author_and_software_defined_assembly
155	2I2W	2i2w-assembly3.cif	{'ent_1': 4}	tetrameric	4	PISA	software_defined_assembly
156	3TEG	3teg-assembly1.cif	{'ent_1': 1}	monomeric	1	PISA	author_and_software_defined_assembly
157	6NC1	6nc1-assembly1.cif	{'ent_1': 1}	monomeric	1	?	author_defined_assembly
158	6NC1	6nc1-assembly2.cif	{'ent_1': 1}	monomeric	1	?	author_defined_assembly
159	6NC4	6nc4-assembly1.cif	{'ent_1': 1}	monomeric	1	?	author_defined_assembly
160	6NC4	6nc4-assembly2.cif	{'ent_1': 1}	monomeric	1	?	author_defined_assembly
161	6NC7	6nc7-assembly1.cif	{'ent_1': 1}	monomeric	1	PISA	author_and_software_defined_assembly
162	6NC7	6nc7-assembly2.cif	{'ent_1': 1}	monomeric	1	PISA	author_and_software_defined_assembly
163	6NC6	6nc6-assembly1.cif	{'ent_1': 1}	monomeric	1	PISA	author_and_software_defined_assembly
164	6NC6	6nc6-assembly2.cif	{'ent_1': 1}	monomeric	1	PISA	author_and_software_defined_assembly
165	6NC9	6nc9-assembly1.cif	{'ent_1': 1}	monomeric	1	?	author_defined_assembly
166	6NC8	6nc8-assembly1.cif	{'ent_1': 1}	monomeric	1	PISA	author_and_software_defined_assembly
167	4FF6	4ff6-assembly1.cif	{'ent_1': 1}	monomeric	1	PISA	author_and_software_defined_assembly
168	4FF6	4ff6-assembly2.cif	{'ent_1': 1}	monomeric	1	PISA	author_and_software_defined_assembly
169	6EB3	6eb3-assembly1.cif	{'ent_1': 1}	monomeric	1	PISA	author_and_software_defined_assembly
170	6EB3	6eb3-assembly2.cif	{'ent_1': 1}	monomeric	1	PISA	author_and_software_defined_assembly
171	6EB3	6eb3-assembly3.cif	{'ent_1': 1}	monomeric	1	PISA	author_and_software_defined_assembly
172	6EB3	6eb3-assembly4.cif	{'ent_1': 1}	monomeric	1	PISA	author_and_software_defined_assembly
173	1DI6	1di6-assembly1.cif	{'ent_1': 3}	trimeric	3	PISA,PQS	author_and_software_defined_assembly
174	1PUT	1put-assembly1.cif	{'ent_1': 1}	monomeric	1	?	author_defined_assembly
175	5BY4	5by4-assembly1.cif	{'ent_1': 2}	dimeric	2	PISA	software_defined_assembly
176	6D9E	6d9e-assembly1.cif	{'ent_1': 2}	dimeric	2	?	author_defined_assembly
177	6D9D	6d9d-assembly1.cif	{'ent_1': 2}	dimeric	2	?	author_defined_assembly
178	2O89	2o89-assembly1.cif	{'ent_1': 1}	monomeric	1	?	author_defined_assembly
179	6D9C	6d9c-assembly1.cif	{'ent_1': 2}	dimeric	2	?	author_defined_assembly
180	4RLQ	4rlq-assembly1.cif	{'ent_1': 1}	monomeric	1	PISA	author_and_software_defined_assembly
181	4RLQ	4rlq-assembly2.cif	{'ent_1': 1}	monomeric	1	PISA	author_and_software_defined_assembly
182	6D9M	6d9m-assembly1.cif	{'ent_1': 1}	monomeric	1	PISA	author_and_software_defined_assembly
183	6K26	6k26-assembly1.cif	{'ent_1': 1}	monomeric	1	?	author_defined_assembly
184	6K26	6k26-assembly2.cif	{'ent_1': 1}	monomeric	1	?	author_defined_assembly
185	2O87	2o87-assembly1.cif	{'ent_1': 1}	monomeric	1	?	author_defined_assembly
186	6TR8	6tr8-assembly1.cif	{'ent_1': 1}	monomeric	1	PISA	author_and_software_defined_assembly
187	6K21	6k21-assembly1.cif	{'ent_1': 6}	hexameric	6	PISA	author_and_software_defined_assembly
188	6K20	6k20-assembly1.cif	{'ent_1': 1}	monomeric	1	PISA	author_and_software_defined_assembly
189	4RLF	4rlf-assembly1.cif	{'ent_1': 1}	monomeric	1	PISA	author_and_software_defined_assembly
190	4RLF	4rlf-assembly2.cif	{'ent_1': 1}	monomeric	1	PISA	author_and_software_defined_assembly
191	6D9T	6d9t-assembly1.cif	{'ent_1': 2}	dimeric	2	PISA	author_and_software_defined_assembly
192	6D9W	6d9w-assembly1.cif	{'ent_3': 1, 'ent_2': 1, 'ent_1': 1}	trimeric	3	PISA	author_and_software_defined_assembly
193	6D9Q	6d9q-assembly1.cif	{'ent_1': 4}	tetrameric	4	PISA	author_and_software_defined_assembly
194	6D9S	6d9s-assembly1.cif	{'ent_1': 4}	tetrameric	4	PISA	author_and_software_defined_assembly
195	6D9R	6d9r-assembly1.cif	{'ent_1': 2}	dimeric	2	PISA	author_and_software_defined_assembly
196	6D9Y	6d9y-assembly1.cif	{'ent_1': 4}	tetrameric	4	PISA	author_and_software_defined_assembly
197	1PUZ	1puz-assembly1.cif	{'ent_1': 1}	monomeric	1	?	author_defined_assembly
198	4RLH	4rlh-assembly1.cif	{'ent_1': 4}	tetrameric	4	PISA	author_and_software_defined_assembly
199	6D9Z	6d9z-assembly1.cif	{'ent_1': 6}	hexameric	6	PISA	author_and_software_defined_assembly
200	4RL4	4rl4-assembly1.cif	{'ent_1': 2}	dimeric	2	PISA	author_and_software_defined_assembly
201	2O8X	2o8x-assembly1.cif	{'ent_1': 3}	trimeric	3	PISA	author_and_software_defined_assembly
202	2O8X	2o8x-assembly2.cif	{'ent_1': 36}	36-meric	36	PISA	software_defined_assembly
203	2O8X	2o8x-assembly3.cif	{'ent_1': 6}	hexameric	6	PISA	software_defined_assembly
204	1JUY	1juy-assembly1.cif	{'ent_1': 2}	dimeric	2	?	author_defined_assembly
205	1JUT	1jut-assembly1.cif	{'ent_1': 2}	dimeric	2	PISA	author_and_software_defined_assembly
206	2O8V	2o8v-assembly1.cif	{'ent_2': 2, 'ent_1': 2}	tetrameric	4	?	author_defined_assembly
207	2O8V	2o8v-assembly2.cif	{'ent_2': 1, 'ent_1': 1}	dimeric	2	PISA,PQS	software_defined_assembly
208	1PZ1	1pz1-assembly1.cif	{'ent_1': 1}	monomeric	1	?	author_defined_assembly
209	1PZ1	1pz1-assembly2.cif	{'ent_1': 1}	monomeric	1	?	author_defined_assembly
210	1PZ0	1pz0-assembly1.cif	{'ent_1': 1}	monomeric	1	?	author_defined_assembly
211	6K2Q	6k2q-assembly1.cif	{'ent_1': 2}	dimeric	2	PISA	author_and_software_defined_assembly
212	6K2Q	6k2q-assembly2.cif	{'ent_1': 2}	dimeric	2	PISA	author_and_software_defined_assembly
213	2O8R	2o8r-assembly1.cif	{'ent_1': 2}	dimeric	2	PISA	author_and_software_defined_assembly
214	6TRE	6tre-assembly1.cif	{'ent_1': 3}	32-meric	32	PISA	author_and_software_defined_assembly
215	2023-07-01	1jul-assembly1.cif	{'ent_1': 1}	monomeric	1	?	author_defined_assembly
216	6K2L	6k2l-assembly1.cif	{'ent_1': 2}	dimeric	2	?	author_defined_assembly
217	6D91	6d91-assembly1.cif	{'ent_1': 1}	monomeric	1	PISA	author_and_software_defined_assembly
218	1JUK	1juk-assembly1.cif	{'ent_1': 1}	monomeric	1	?	author_defined_assembly
219	2O8K	2o8k-assembly1.cif	{'ent_3': 1, 'ent_2': 1, 'ent_1': 1}	trimeric	3	?	author_defined_assembly
220	2O8E	2o8e-assembly1.cif	{'ent_3': 1, 'ent_2': 1, 'ent_1': 1, 'ent_4': 1}	tetrameric	4	?	author_defined_assembly
221	2O8D	2o8d-assembly1.cif	{'ent_3': 1, 'ent_2': 1, 'ent_1': 1, 'ent_4': 1}	tetrameric	4	?	author_defined_assembly
222	1JUD	1jud-assembly1.cif	{'ent_1': 2}	dimeric	2	PISA,PQS	author_and_software_defined_assembly
223	1JUE	1jue-assembly1.cif	{'ent_1': 2}	dimeric	2	PISA	author_and_software_defined_assembly
224	1JUB	1jub-assembly1.cif	{'ent_1': 2}	dimeric	2	PISA	author_and_software_defined_assembly
225	2O8C	2o8c-assembly1.cif	{'ent_3': 1, 'ent_2': 1, 'ent_1': 1, 'ent_4': 1}	tetrameric	4	?	author_defined_assembly
226	2O8B	2o8b-assembly1.cif	{'ent_3': 1, 'ent_2': 1, 'ent_1': 1, 'ent_4': 1}	tetrameric	4	?	author_defined_assembly
227	3R25	3r25-assembly1.cif	{'ent_1': 2}	dimeric	2	PISA	author_and_software_defined_assembly
228	3R25	3r25-assembly2.cif	{'ent_1': 2}	dimeric	2	PISA	author_and_software_defined_assembly
229	3R25	3r25-assembly3.cif	{'ent_1': 2}	dimeric	2	PISA	author_and_software_defined_assembly
230	3R25	3r25-assembly4.cif	{'ent_1': 2}	dimeric	2	PISA	author_and_software_defined_assembly
231	3R25	3r25-assembly5.cif	{'ent_1': 4}	tetrameric	4	PISA	software_defined_assembly
232	3R25	3r25-assembly6.cif	{'ent_1': 4}	tetrameric	4	PISA	software_defined_assembly
233	3R25	3r25-assembly7.cif	{'ent_1': 8}	octameric	8	PISA	author_and_software_defined_assembly
234	5V10	5v10-assembly1.cif	{'ent_1': 4}	tetrameric	4	PISA	author_and_software_defined_assembly
235	3R26	3r26-assembly1.cif	{'ent_1': 1}	monomeric	1	PISA	author_and_software_defined_assembly
236	3R20	3r20-assembly1.cif	{'ent_1': 1}	monomeric	1	?	author_defined_assembly
237	3R20	3r20-assembly2.cif	{'ent_1': 3}	trimeric	3	PISA	software_defined_assembly
238	3R20	3r20-assembly3.cif	{'ent_1': 2}	dimeric	2	PISA	software_defined_assembly
239	3R23	3r23-assembly1.cif	{'ent_1': 2}	dimeric	2	PISA	author_and_software_defined_assembly
240	6X3C	6x3c-assembly1.cif	{'ent_1': 3}	trimeric	3	PISA	author_and_software_defined_assembly
241	6X3C	6x3c-assembly2.cif	{'ent_1': 3}	trimeric	3	PISA	author_and_software_defined_assembly
242	6X3B	6x3b-assembly1.cif	{'ent_1': 2}	dimeric	2	PISA	author_and_software_defined_assembly
243	6X3B	6x3b-assembly2.cif	{'ent_1': 2}	dimeric	2	PISA	author_and_software_defined_assembly
244	6X3J	6x3j-assembly1.cif	{'ent_1': 3}	trimeric	3	PISA	author_and_software_defined_assembly
245	6X3J	6x3j-assembly2.cif	{'ent_1': 3}	trimeric	3	PISA	author_and_software_defined_assembly
246	7N9D	7n9d-assembly1.cif	{'ent_1': 2}	dimeric	2	PISA	author_and_software_defined_assembly
247	4REU	4reu-assembly1.cif	{'ent_1': 24}	24-meric	24	PISA	author_and_software_defined_assembly
248	1PUN	1pun-assembly1.cif	{'ent_1': 1}	monomeric	1	?	author_defined_assembly
249	7N9Z	7n9z-assembly1.cif	{'ent_3': 1, 'ent_2': 1, 'ent_1': 1, 'ent_4': 1}	tetrameric	4	?	author_defined_assembly
250	7N9W	7n9w-assembly1.cif	{'ent_1': 2}	dimeric	2	?	author_defined_assembly
251	2WJR	2wjr-assembly1.cif	{'ent_1': 1}	monomeric	1	PISA	author_and_software_defined_assembly
252	7N98	7n98-assembly1.cif	{'ent_1': 1}	monomeric	1	?	author_defined_assembly
253	3R2U	3r2u-assembly1.cif	{'ent_1': 4}	tetrameric	4	PISA	author_and_software_defined_assembly
254	3R2Q	3r2q-assembly1.cif	{'ent_1': 2}	dimeric	2	PISA	author_and_software_defined_assembly
255	2ENU	2enu-assembly1.cif	{'ent_1': 1}	monomeric	1	?	author_defined_assembly
256	2ENU	2enu-assembly2.cif	{'ent_1': 1}	monomeric	1	?	author_defined_assembly
257	2ENW	2enw-assembly1.cif	{'ent_1': 1}	monomeric	1	?	author_defined_assembly
258	2ENW	2enw-assembly2.cif	{'ent_1': 1}	monomeric	1	?	author_defined_assembly
259	3R2J	3r2j-assembly1.cif	{'ent_1': 2}	dimeric	2	PISA	author_and_software_defined_assembly
260	3R2J	3r2j-assembly2.cif	{'ent_1': 2}	dimeric	2	PISA	author_and_software_defined_assembly
261	3R2E	3r2e-assembly1.cif	{'ent_1': 8}	octameric	8	PISA	author_and_software_defined_assembly
262	3R2G	3r2g-assembly1.cif	{'ent_1': 1}	monomeric	1	?	author_defined_assembly
263	3R2G	3r2g-assembly2.cif	{'ent_1': 4}	tetrameric	4	PISA	software_defined_assembly
264	4O1J	4o1j-assembly1.cif	{'ent_1': 4}	tetrameric	4	PISA	author_and_software_defined_assembly
265	4O1K	4o1k-assembly1.cif	{'ent_1': 4}	tetrameric	4	PISA	author_and_software_defined_assembly
266	3F80	3f80-assembly1.cif	{'ent_1': 3}	trimeric	3	PISA	author_and_software_defined_assembly
267	3F80	3f80-assembly2.cif	{'ent_1': 3}	trimeric	3	PISA	author_and_software_defined_assembly
268	1Z63	1z63-assembly1.cif	{'ent_3': 1, 'ent_2': 1, 'ent_1': 1}	trimeric	3	?	author_defined_assembly
269	1Z63	1z63-assembly2.cif	{'ent_3': 1, 'ent_2': 1, 'ent_1': 1}	trimeric	3	?	author_defined_assembly
270	3E3A	3e3a-assembly1.cif	{'ent_1': 2}	dimeric	2	PISA	author_and_software_defined_assembly
271	3E3G	3e3g-assembly1.cif	{'ent_1': 4}	tetrameric	4	PISA	author_and_software_defined_assembly
272	3E3G	3e3g-assembly2.cif	{'ent_1': 4}	tetrameric	4	PISA	author_and_software_defined_assembly
273	3E3F	3e3f-assembly1.cif	{'ent_1': 4}	tetrameric	4	PISA	author_and_software_defined_assembly
274	3E3I	3e3i-assembly1.cif	{'ent_1': 4}	tetrameric	4	PISA	author_and_software_defined_assembly
275	3E3I	3e3i-assembly2.cif	{'ent_1': 4}	tetrameric	4	PISA	author_and_software_defined_assembly
276	3E3I	3e3i-assembly3.cif	{'ent_1': 4}	tetrameric	4	PISA	author_and_software_defined_assembly
277	3E3K	3e3k-assembly1.cif	{'ent_1': 1}	monomeric	1	PISA	author_and_software_defined_assembly
278	3E3K	3e3k-assembly2.cif	{'ent_1': 1}	monomeric	1	PISA	author_and_software_defined_assembly
279	3E3K	3e3k-assembly3.cif	{'ent_1': 1}	monomeric	1	PISA	author_and_software_defined_assembly
280	3E3M	3e3m-assembly1.cif	{'ent_1': 2}	dimeric	2	PISA	author_and_software_defined_assembly
281	3E3M	3e3m-assembly2.cif	{'ent_1': 2}	dimeric	2	PISA	author_and_software_defined_assembly
282	3e+31	3e31-assembly1.cif	{'ent_1': 4}	tetrameric	4	PISA	author_and_software_defined_assembly
283	3F8K	3f8k-assembly1.cif	{'ent_1': 1}	monomeric	1	PISA	author_and_software_defined_assembly
284	3F8N	3f8n-assembly1.cif	{'ent_1': 2}	dimeric	2	PISA	author_and_software_defined_assembly
285	3F8M	3f8m-assembly1.cif	{'ent_1': 2}	dimeric	2	PISA	author_and_software_defined_assembly
286	3F8D	3f8d-assembly1.cif	{'ent_1': 2}	dimeric	2	PISA	author_and_software_defined_assembly
287	3F8D	3f8d-assembly2.cif	{'ent_1': 2}	dimeric	2	PISA	author_and_software_defined_assembly
288	3F8R	3f8r-assembly1.cif	{'ent_1': 2}	dimeric	2	PISA	author_and_software_defined_assembly
289	3F8R	3f8r-assembly2.cif	{'ent_1': 2}	dimeric	2	PISA	author_and_software_defined_assembly
290	3F8P	3f8p-assembly1.cif	{'ent_1': 2}	dimeric	2	PISA	author_and_software_defined_assembly
291	3F8P	3f8p-assembly2.cif	{'ent_1': 2}	dimeric	2	PISA	author_and_software_defined_assembly
292	1RBR	1rbr-assembly1.cif	{'ent_1': 1}	monomeric	1	?	author_defined_assembly
293	5UGJ	5ugj-assembly1.cif	{'ent_1': 4}	tetrameric	4	PISA	author_and_software_defined_assembly
294	5HEC	5hec-assembly1.cif	{'ent_1': 2}	dimeric	2	PISA	author_and_software_defined_assembly
295	4P3J	4p3j-assembly1.cif	{'ent_1': 3}	Trimeric	3	PISA	software_defined_assembly
296	4P3M	4p3m-assembly1.cif	{'ent_1': 2}	dimeric	2	PISA	software_defined_assembly
297	5HEI	5hei-assembly1.cif	{'ent_1': 2}	dimeric	2	PISA	author_and_software_defined_assembly
298	5HEI	5hei-assembly2.cif	{'ent_1': 2}	dimeric	2	PISA	author_and_software_defined_assembly
299	5HEI	5hei-assembly3.cif	{'ent_1': 2}	dimeric	2	PISA	author_and_software_defined_assembly
300	5HEI	5hei-assembly4.cif	{'ent_1': 2}	dimeric	2	PISA	author_and_software_defined_assembly
301	4P3O	4p3o-assembly1.cif	{'ent_1': 2}	dimeric	2	PISA	author_and_software_defined_assembly
302	5HEK	5hek-assembly1.cif	{'ent_1': 4}	tetrameric	4	?	author_defined_assembly
303	5HEK	5hek-assembly2.cif	{'ent_1': 2}	dimeric	2	PISA	software_defined_assembly
304	5HEK	5hek-assembly3.cif	{'ent_1': 2}	dimeric	2	PISA	software_defined_assembly
305	4P3Q	4p3q-assembly1.cif	{'ent_1': 1}	monomeric	1	?	author_defined_assembly
306	4P3P	4p3p-assembly1.cif	{'ent_1': 2}	dimeric	2	PISA	author_and_software_defined_assembly
307	5HEV	5hev-assembly1.cif	{'ent_1': 2}	dimeric	2	PISA	author_and_software_defined_assembly
308	5HEV	5hev-assembly2.cif	{'ent_1': 2}	dimeric	2	PISA	author_and_software_defined_assembly
309	4P3R	4p3r-assembly1.cif	{'ent_1': 1}	monomeric	1	?	author_defined_assembly
310	6S09	6s09-assembly1.cif	{'ent_1': 1}	monomeric	1	?	author_defined_assembly
311	6S09	6s09-assembly2.cif	{'ent_1': 1}	monomeric	1	?	author_defined_assembly
312	6S09	6s09-assembly3.cif	{'ent_1': 1}	monomeric	1	?	author_defined_assembly
313	6S09	6s09-assembly4.cif	{'ent_1': 1}	monomeric	1	?	author_defined_assembly
314	6S09	6s09-assembly5.cif	{'ent_1': 1}	monomeric	1	?	author_defined_assembly
315	6S09	6s09-assembly6.cif	{'ent_1': 1}	monomeric	1	?	author_defined_assembly
316	6S09	6s09-assembly7.cif	{'ent_1': 1}	monomeric	1	?	author_defined_assembly
317	6S09	6s09-assembly8.cif	{'ent_1': 1}	monomeric	1	?	author_defined_assembly
318	4P3V	4p3v-assembly1.cif	{'ent_1': 2}	dimeric	2	PISA	author_and_software_defined_assembly
319	4P3Y	4p3y-assembly1.cif	{'ent_2': 1, 'ent_1': 1}	dimeric	2	PISA	author_and_software_defined_assembly
320	5UGV	5ugv-assembly1.cif	{'ent_1': 4}	tetrameric	4	PISA	author_and_software_defined_assembly
321	5UGR	5ugr-assembly1.cif	{'ent_1': 6}	hexameric	6	PISA	author_and_software_defined_assembly
322	8D8S	8d8s-assembly1.cif	{'ent_1': 2}	dimeric	2	PISA	software_defined_assembly
323	3MWM	3mwm-assembly1.cif	{'ent_1': 2}	dimeric	2	PISA	author_and_software_defined_assembly
324	3MWM	3mwm-assembly2.cif	{'ent_1': 2}	dimeric	2	PISA	author_and_software_defined_assembly
325	8D88	8d88-assembly1.cif	{'ent_1': 2}	dimeric	2	PISA	author_and_software_defined_assembly
326	1XKY	1xky-assembly1.cif	{'ent_1': 4}	tetrameric	4	PISA	author_and_software_defined_assembly
327	6S0I	6s0i-assembly1.cif	{'ent_1': 1}	monomeric	1	PISA	author_and_software_defined_assembly
328	6S0K	6s0k-assembly1.cif	{'ent_31': 1, 'ent_29': 1, 'ent_30': 1, 'ent_20': 1, 'ent_32': 1, 'ent_9': 1, 'ent_21': 1, 'ent_34': 1, 'ent_3': 1, 'ent_2': 1, 'ent_1': 1, 'ent_7': 1, 'ent_6': 1, 'ent_5': 1, 'ent_4': 1, 'ent_22': 1, 'ent_23': 1, 'ent_19': 1, 'ent_18': 1, 'ent_26': 1, 'ent_27': 1, 'ent_24': 1, 'ent_25': 1, 'ent_13': 1, 'ent_12': 1, 'ent_11': 1, 'ent_10': 1, 'ent_17': 1, 'ent_16': 1, 'ent_15': 1, 'ent_14': 1, 'en…	35-meric	35	PISA	author_and_software_defined_assembly
329	6S0G	6s0g-assembly1.cif	{'ent_1': 1}	monomeric	1	PISA	author_and_software_defined_assembly
330	6S0C	6s0c-assembly1.cif	{'ent_1': 4}	tetrameric	4	PISA	author_and_software_defined_assembly
331	4P31	4p31-assembly1.cif	{'ent_1': 1}	monomeric	1	PISA	author_and_software_defined_assembly
332	4P31	4p31-assembly2.cif	{'ent_1': 1}	monomeric	1	PISA	author_and_software_defined_assembly
333	4P33	4p33-assembly1.cif	{'ent_1': 2}	dimeric	2	?	author_defined_assembly
334	4P33	4p33-assembly2.cif	{'ent_1': 2}	dimeric	2	?	author_defined_assembly
335	4P33	4p33-assembly3.cif	{'ent_1': 4}	tetrameric	4	PISA	software_defined_assembly
336	4P32	4p32-assembly1.cif	{'ent_1': 1}	monomeric	1	PISA	author_and_software_defined_assembly
337	4P32	4p32-assembly2.cif	{'ent_1': 1}	monomeric	1	PISA	author_and_software_defined_assembly
338	4P35	4p35-assembly1.cif	{'ent_1': 2}	dimeric	2	PISA	author_and_software_defined_assembly
339	6S0X	6s0x-assembly1.cif	{'ent_49': 1, 'ent_9': 1, 'ent_8': 1, 'ent_3': 1, 'ent_2': 1, 'ent_1': 1, 'ent_7': 1, 'ent_6': 1, 'ent_5': 1, 'ent_4': 1, 'ent_31': 1, 'ent_30': 1, 'ent_19': 1, 'ent_32': 1, 'ent_35': 1, 'ent_34': 1, 'ent_37': 1, 'ent_36': 1, 'ent_13': 1, 'ent_12': 1, 'ent_11': 1, 'ent_10': 1, 'ent_17': 1, 'ent_16': 1, 'ent_15': 1, 'ent_14': 1, 'ent_33': 1, 'ent_51': 1, 'ent_18': 1, 'ent_52': 1, 'ent_22': 1, 'ent…	52-meric	52	PISA	software_defined_assembly
340	6S0Z	6s0z-assembly1.cif	{'ent_29': 1, 'ent_30': 1, 'ent_20': 1, 'ent_9': 1, 'ent_21': 1, 'ent_3': 1, 'ent_2': 1, 'ent_1': 1, 'ent_7': 1, 'ent_6': 1, 'ent_5': 1, 'ent_4': 1, 'ent_22': 1, 'ent_23': 1, 'ent_19': 1, 'ent_18': 1, 'ent_26': 1, 'ent_27': 1, 'ent_24': 1, 'ent_25': 1, 'ent_13': 1, 'ent_12': 1, 'ent_11': 1, 'ent_10': 1, 'ent_17': 1, 'ent_16': 1, 'ent_15': 1, 'ent_14': 1, 'ent_8': 1, 'ent_28': 1}	30-meric	30	PISA	author_and_software_defined_assembly
341	5UG4	5ug4-assembly1.cif	{'ent_1': 12}	dodecameric	12	PISA	author_and_software_defined_assembly
342	5GMC	5gmc-assembly1.cif	{'ent_1': 2}	dimeric	2	PISA	author_and_software_defined_assembly
343	5GMC	5gmc-assembly2.cif	{'ent_1': 2}	dimeric	2	PISA	author_and_software_defined_assembly
344	5GMB	5gmb-assembly1.cif	{'ent_1': 2}	dimeric	2	PISA	author_and_software_defined_assembly
345	1KYY	1kyy-assembly1.cif	{'ent_1': 5}	pentameric	5	PISA	author_and_software_defined_assembly
346	1KYY	1kyy-assembly2.cif	{'ent_1': 10}	decameric	10	PISA	software_defined_assembly
347	5GMS	5gms-assembly1.cif	{'ent_1': 1}	monomeric	1	?	author_defined_assembly
348	5GMS	5gms-assembly2.cif	{'ent_1': 1}	monomeric	1	?	author_defined_assembly
349	5GMR	5gmr-assembly1.cif	{'ent_1': 1}	monomeric	1	PISA	author_and_software_defined_assembly
350	5GMR	5gmr-assembly2.cif	{'ent_1': 1}	monomeric	1	PISA	author_and_software_defined_assembly
351	5GMR	5gmr-assembly3.cif	{'ent_1': 1}	monomeric	1	PISA	author_and_software_defined_assembly
352	5GMR	5gmr-assembly4.cif	{'ent_1': 1}	monomeric	1	PISA	author_and_software_defined_assembly
353	6WOP	6wop-assembly1.cif	{'ent_1': 4}	tetrameric	4	PISA	author_and_software_defined_assembly
354	2X8C	2x8c-assembly1.cif	{'ent_1': 2}	dimeric	2	PISA	author_and_software_defined_assembly
355	6JQT	6jqt-assembly1.cif	{'ent_1': 1}	monomeric	1	?	author_defined_assembly
356	6JQQ	6jqq-assembly1.cif	{'ent_1': 4}	tetrameric	4	PISA	author_and_software_defined_assembly
357	6JQO	6jqo-assembly1.cif	{'ent_1': 6}	hexameric	6	?	author_defined_assembly
358	6JQN	6jqn-assembly1.cif	{'ent_1': 6}	hexameric	6	?	author_defined_assembly
359	6JQM	6jqm-assembly1.cif	{'ent_1': 6}	hexameric	6	?	author_defined_assembly
360	6JQL	6jql-assembly1.cif	{'ent_1': 6}	hexameric	6	?	author_defined_assembly
361	6WOM	6wom-assembly1.cif	{'ent_1': 2}	dimeric	2	PISA	author_and_software_defined_assembly
362	6WOM	6wom-assembly2.cif	{'ent_1': 2}	dimeric	2	PISA	author_and_software_defined_assembly
363	6WON	6won-assembly1.cif	{'ent_1': 4}	tetrameric	4	PISA	author_and_software_defined_assembly
364	6WON	6won-assembly2.cif	{'ent_1': 4}	tetrameric	4	PISA	author_and_software_defined_assembly
365	6WOO	6woo-assembly1.cif	{'ent_84': 1, 'ent_49': 1, 'ent_65': 1, 'ent_9': 1, 'ent_8': 1, 'ent_59': 1, 'ent_3': 1, 'ent_2': 1, 'ent_1': 1, 'ent_58': 1, 'ent_7': 1, 'ent_6': 1, 'ent_5': 1, 'ent_4': 1, 'ent_31': 1, 'ent_30': 1, 'ent_19': 1, 'ent_32': 1, 'ent_35': 1, 'ent_34': 1, 'ent_37': 1, 'ent_36': 1, 'ent_13': 1, 'ent_12': 1, 'ent_11': 1, 'ent_10': 1, 'ent_17': 1, 'ent_16': 1, 'ent_15': 1, 'ent_14': 1, 'ent_79': 1, 'ent…	84-meric	84	?	author_defined_assembly
366	7C3F	7c3f-assembly1.cif	{'ent_3': 1, 'ent_2': 1, 'ent_1': 1}	trimeric	3	?	author_defined_assembly
367	7C3F	7c3f-assembly2.cif	{'ent_3': 1, 'ent_2': 1, 'ent_1': 1}	trimeric	3	?	author_defined_assembly
368	7C3F	7c3f-assembly3.cif	{'ent_3': 1, 'ent_2': 1, 'ent_1': 1}	trimeric	3	?	author_defined_assembly
369	7C3F	7c3f-assembly4.cif	{'ent_3': 1, 'ent_2': 1, 'ent_1': 1}	trimeric	3	?	author_defined_assembly
370	7C3F	7c3f-assembly5.cif	{'ent_3': 1, 'ent_2': 1, 'ent_1': 1}	trimeric	3	?	author_defined_assembly
371	7C3F	7c3f-assembly6.cif	{'ent_3': 1, 'ent_2': 1, 'ent_1': 1}	trimeric	3	?	author_defined_assembly
372	7C3F	7c3f-assembly7.cif	{'ent_3': 1, 'ent_2': 1, 'ent_1': 1}	trimeric	3	?	author_defined_assembly
373	7C3F	7c3f-assembly8.cif	{'ent_3': 6, 'ent_2': 1, 'ent_1': 1}	dimeric	2	?	author_defined_assembly
374	6WO1	6wo1-assembly1.cif	{'ent_2': 1, 'ent_1': 1}	dimeric	2	?	author_defined_assembly
375	7C3A	7c3a-assembly1.cif	{'ent_1': 1}	monomeric	1	PISA	author_and_software_defined_assembly
376	7C3A	7c3a-assembly2.cif	{'ent_1': 1}	monomeric	1	PISA	author_and_software_defined_assembly
377	7C3A	7c3a-assembly3.cif	{'ent_1': 1}	monomeric	1	PISA	author_and_software_defined_assembly
378	6JQ8	6jq8-assembly1.cif	{'ent_1': 1}	monomeric	1	PISA	author_and_software_defined_assembly
379	6JQ4	6jq4-assembly1.cif	{'ent_1': 1}	monomeric	1	?	author_defined_assembly
380	5HWK	5hwk-assembly1.cif	{'ent_1': 1}	monomeric	1	PISA	author_and_software_defined_assembly
381	5HWK	5hwk-assembly2.cif	{'ent_1': 1}	monomeric	1	PISA	author_and_software_defined_assembly
382	1H5R	1h5r-assembly1.cif	{'ent_2': 1, 'ent_1': 3}	tetrameric	4	PQS	author_and_software_defined_assembly
383	5HWI	5hwi-assembly1.cif	{'ent_1': 1}	monomeric	1	?	author_defined_assembly
384	5AIA	5aia-assembly1.cif	{'ent_1': 2}	dimeric	2	PISA	author_and_software_defined_assembly
385	5GM8	5gm8-assembly1.cif	{'ent_1': 2}	dimeric	2	PISA	author_and_software_defined_assembly
386	5GM8	5gm8-assembly2.cif	{'ent_1': 2}	dimeric	2	PISA	author_and_software_defined_assembly
387	6CXK	6cxk-assembly1.cif	{'ent_1': 1}	monomeric	1	PISA	author_and_software_defined_assembly
388	5GM2	5gm2-assembly1.cif	{'ent_1': 6}	hexameric	6	?	author_defined_assembly
389	5GM2	5gm2-assembly2.cif	{'ent_1': 6}	hexameric	6	?	author_defined_assembly
390	5GM2	5gm2-assembly3.cif	{'ent_1': 6}	hexameric	6	?	author_defined_assembly
391	5GM1	5gm1-assembly1.cif	{'ent_1': 6}	hexameric	6	?	author_defined_assembly
392	5GM1	5gm1-assembly2.cif	{'ent_1': 6}	hexameric	6	?	author_defined_assembly
393	5GM1	5gm1-assembly3.cif	{'ent_1': 6}	hexameric	6	?	author_defined_assembly
394	5GM6	5gm6-assembly1.cif	{'ent_9': 1, 'ent_8': 1, 'ent_3': 1, 'ent_2': 1, 'ent_1': 1, 'ent_7': 1, 'ent_6': 1, 'ent_5': 1, 'ent_4': 1, 'ent_31': 1, 'ent_30': 1, 'ent_19': 1, 'ent_32': 1, 'ent_35': 1, 'ent_34': 4, 'ent_37': 1, 'ent_36': 1, 'ent_13': 1, 'ent_12': 1, 'ent_11': 1, 'ent_10': 1, 'ent_17': 1, 'ent_16': 1, 'ent_15': 1, 'ent_14': 1, 'ent_33': 1, 'ent_18': 1, 'ent_22': 1, 'ent_23': 1, 'ent_20': 1, 'ent_21': 1, 'ent…	46-meric	46	?	author_defined_assembly
395	1Q5Y	1q5y-assembly1.cif	{'ent_1': 4}	tetrameric	4	PISA	author_and_software_defined_assembly
396	1Q5X	1q5x-assembly1.cif	{'ent_1': 3}	trimeric	3	PISA	author_and_software_defined_assembly
397	1Q5U	1q5u-assembly1.cif	{'ent_1': 3}	trimeric	3	PISA	author_and_software_defined_assembly
398	1Q5V	1q5v-assembly1.cif	{'ent_1': 4}	tetrameric	4	PISA	author_and_software_defined_assembly
399	1Q5L	1q5l-assembly1.cif	{'ent_2': 1, 'ent_1': 1}	dimeric	2	?	author_defined_assembly
400	1Q5N	1q5n-assembly1.cif	{'ent_1': 4}	tetrameric	4	PISA,PQS	author_and_software_defined_assembly
401	1Q5H	1q5h-assembly1.cif	{'ent_1': 3}	trimeric	3	PISA	author_and_software_defined_assembly
402	2X86	2x86-assembly1.cif	{'ent_1': 5}	pentameric	5	PISA	author_and_software_defined_assembly
403	2X86	2x86-assembly2.cif	{'ent_1': 5}	pentameric	5	PISA	author_and_software_defined_assembly
404	2X86	2x86-assembly3.cif	{'ent_1': 5}	pentameric	5	PISA	author_and_software_defined_assembly
405	2X86	2x86-assembly4.cif	{'ent_1': 5}	pentameric	5	PISA	author_and_software_defined_assembly
406	6MYX	6myx-assembly1.cif	{'ent_1': 12}	dodecameric	12	?	representative helical assembly
407	5J83	5j83-assembly1.cif	{'ent_1': 4}	tetrameric	4	PISA	author_and_software_defined_assembly
408	5J85	5j85-assembly1.cif	{'ent_1': 4}	tetrameric	4	PISA	author_and_software_defined_assembly
409	5J84	5j84-assembly1.cif	{'ent_1': 4}	tetrameric	4	PISA	author_and_software_defined_assembly
410	5J84	5j84-assembly2.cif	{'ent_1': 4}	tetrameric	4	PISA	author_and_software_defined_assembly
411	6MYP	6myp-assembly1.cif	{'ent_3': 1, 'ent_2': 1, 'ent_1': 1, 'ent_4': 1}	tetrameric	4	PISA	author_and_software_defined_assembly
412	5J88	5j88-assembly1.cif	{'ent_49': 1, 'ent_9': 1, 'ent_8': 1, 'ent_3': 1, 'ent_2': 1, 'ent_1': 1, 'ent_7': 1, 'ent_6': 1, 'ent_5': 1, 'ent_4': 1, 'ent_31': 1, 'ent_30': 1, 'ent_19': 1, 'ent_32': 1, 'ent_35': 1, 'ent_34': 1, 'ent_37': 1, 'ent_36': 1, 'ent_13': 1, 'ent_12': 1, 'ent_11': 1, 'ent_10': 1, 'ent_17': 1, 'ent_16': 1, 'ent_15': 1, 'ent_14': 1, 'ent_33': 1, 'ent_51': 1, 'ent_18': 1, 'ent_55': 6, 'ent_53': 1, 'ent…	53-meric	53	?	author_defined_assembly
413	5J88	5j88-assembly2.cif	{'ent_49': 1, 'ent_9': 1, 'ent_8': 1, 'ent_3': 1, 'ent_2': 1, 'ent_1': 1, 'ent_7': 1, 'ent_6': 1, 'ent_5': 1, 'ent_4': 1, 'ent_31': 1, 'ent_30': 1, 'ent_19': 1, 'ent_32': 1, 'ent_35': 1, 'ent_34': 1, 'ent_37': 1, 'ent_36': 1, 'ent_13': 1, 'ent_12': 1, 'ent_11': 1, 'ent_10': 1, 'ent_17': 1, 'ent_16': 1, 'ent_15': 1, 'ent_14': 1, 'ent_33': 1, 'ent_51': 1, 'ent_18': 1, 'ent_55': 1, 'ent_53': 1, 'ent…	52-meric	52	?	author_defined_assembly
414	6MYR	6myr-assembly1.cif	{'ent_3': 1, 'ent_2': 1, 'ent_1': 1, 'ent_4': 1}	tetrameric	4	PISA	author_and_software_defined_assembly
415	6MYS	6mys-assembly1.cif	{'ent_3': 1, 'ent_2': 1, 'ent_1': 1, 'ent_4': 1}	tetrameric	4	PISA	author_and_software_defined_assembly
416	6MYT	6myt-assembly1.cif	{'ent_3': 1, 'ent_2': 1, 'ent_1': 1, 'ent_4': 1}	tetrameric	4	PISA	author_and_software_defined_assembly
417	6MYU	6myu-assembly1.cif	{'ent_3': 1, 'ent_2': 1, 'ent_1': 1, 'ent_4': 1}	tetrameric	4	PISA	author_and_software_defined_assembly
418	6MYO	6myo-assembly1.cif	{'ent_3': 1, 'ent_2': 1, 'ent_1': 1, 'ent_4': 1}	tetrameric	4	PISA	author_and_software_defined_assembly
419	3DA8	3da8-assembly1.cif	{'ent_1': 2}	dimeric	2	PISA	author_and_software_defined_assembly
420	3DA8	3da8-assembly2.cif	{'ent_1': 1}	monomeric	1	PISA	software_defined_assembly
421	3DA8	3da8-assembly3.cif	{'ent_1': 1}	monomeric	1	PISA	software_defined_assembly
422	5J8Q	5j8q-assembly1.cif	{'ent_1': 2}	dimeric	2	PISA	author_and_software_defined_assembly
423	3DAA	3daa-assembly1.cif	{'ent_1': 2}	dimeric	2	PISA	author_and_software_defined_assembly
424	5J8X	5j8x-assembly1.cif	{'ent_1': 1}	monomeric	1	PISA	author_and_software_defined_assembly
425	3M1A	3m1a-assembly1.cif	{'ent_1': 10}	decameric	10	PISA	author_and_software_defined_assembly
426	3M1A	3m1a-assembly2.cif	{'ent_1': 2}	dimeric	2	PISA	software_defined_assembly
427	3M1A	3m1a-assembly3.cif	{'ent_1': 2}	dimeric	2	PISA	software_defined_assembly
428	3M1A	3m1a-assembly4.cif	{'ent_1': 2}	dimeric	2	PISA	software_defined_assembly
429	3M1A	3m1a-assembly5.cif	{'ent_1': 2}	dimeric	2	PISA	software_defined_assembly
430	3M1A	3m1a-assembly6.cif	{'ent_1': 2}	dimeric	2	PISA	software_defined_assembly
431	3DAH	3dah-assembly1.cif	{'ent_1': 3}	trimeric	3	?	author_defined_assembly
432	3DAH	3dah-assembly2.cif	{'ent_1': 6}	hexameric	6	PISA	software_defined_assembly
433	1XK7	1xk7-assembly1.cif	{'ent_1': 2}	dimeric	2	?	author_defined_assembly
434	1XK7	1xk7-assembly2.cif	{'ent_1': 2}	dimeric	2	PISA	author_and_software_defined_assembly
435	5J8A	5j8a-assembly1.cif	{'ent_49': 1, 'ent_9': 1, 'ent_8': 1, 'ent_3': 1, 'ent_2': 1, 'ent_1': 1, 'ent_7': 1, 'ent_6': 1, 'ent_5': 1, 'ent_4': 1, 'ent_31': 1, 'ent_30': 1, 'ent_19': 1, 'ent_32': 1, 'ent_35': 1, 'ent_34': 1, 'ent_37': 1, 'ent_36': 1, 'ent_13': 1, 'ent_12': 1, 'ent_11': 1, 'ent_10': 1, 'ent_17': 1, 'ent_16': 1, 'ent_15': 1, 'ent_14': 1, 'ent_33': 1, 'ent_51': 1, 'ent_18': 1, 'ent_55': 6, 'ent_53': 1, 'ent…	53-meric	53	?	author_defined_assembly
436	5J8A	5j8a-assembly2.cif	{'ent_49': 1, 'ent_9': 1, 'ent_8': 1, 'ent_3': 1, 'ent_2': 1, 'ent_1': 1, 'ent_7': 1, 'ent_6': 1, 'ent_5': 1, 'ent_4': 1, 'ent_31': 1, 'ent_30': 1, 'ent_19': 1, 'ent_32': 1, 'ent_35': 1, 'ent_34': 1, 'ent_37': 1, 'ent_36': 1, 'ent_13': 1, 'ent_12': 1, 'ent_11': 1, 'ent_10': 1, 'ent_17': 1, 'ent_16': 1, 'ent_15': 1, 'ent_14': 1, 'ent_33': 1, 'ent_51': 1, 'ent_18': 1, 'ent_55': 1, 'ent_53': 1, 'ent…	52-meric	52	?	author_defined_assembly
437	3DAU	3dau-assembly1.cif	{'ent_1': 1}	monomeric	1	PISA	software_defined_assembly
438	1MH3	1mh3-assembly1.cif	{'ent_1': 1}	monomeric	1	?	author_defined_assembly
439	3DAS	3das-assembly1.cif	{'ent_1': 1}	monomeric	1	PISA	author_and_software_defined_assembly
440	5J8G	5j8g-assembly1.cif	{'ent_1': 2}	dimeric	2	PISA	author_and_software_defined_assembly
441	5J8G	5j8g-assembly2.cif	{'ent_1': 2}	dimeric	2	PISA	author_and_software_defined_assembly
442	1AE9	1ae9-assembly1.cif	{'ent_1': 6}	hexameric	6	?	author_defined_assembly
443	5J8K	5j8k-assembly1.cif	{'ent_49': 1, 'ent_9': 1, 'ent_8': 1, 'ent_59': 2, 'ent_3': 1, 'ent_2': 1, 'ent_1': 1, 'ent_58': 2, 'ent_7': 1, 'ent_6': 1, 'ent_5': 1, 'ent_4': 1, 'ent_31': 1, 'ent_30': 1, 'ent_19': 2, 'ent_32': 1, 'ent_35': 1, 'ent_34': 1, 'ent_37': 1, 'ent_36': 1, 'ent_13': 1, 'ent_12': 1, 'ent_11': 1, 'ent_10': 1, 'ent_17': 1, 'ent_16': 1, 'ent_15': 1, 'ent_14': 1, 'ent_57': 2, 'ent_61': 2, 'ent_56': 2, 'ent…	76-meric	76	?	author_defined_assembly
444	5J8L	5j8l-assembly1.cif	{'ent_1': 2}	dimeric	2	PISA	author_and_software_defined_assembly
445	5J8L	5j8l-assembly2.cif	{'ent_1': 2}	dimeric	2	PISA	author_and_software_defined_assembly
446	3DAY	3day-assembly1.cif	{'ent_1': 1}	monomeric	1	PISA	author_and_software_defined_assembly
447	1QHH	1qhh-assembly1.cif	{'ent_3': 1, 'ent_2': 1, 'ent_1': 1, 'ent_4': 1}	tetrameric	4	PISA	author_and_software_defined_assembly
448	1Q54	1q54-assembly1.cif	{'ent_1': 2}	dimeric	2	PISA	author_and_software_defined_assembly
449	7R0P	7r0p-assembly1.cif	{'ent_1': 2}	dimeric	2	?	author_defined_assembly
450	1Q51	1q51-assembly1.cif	{'ent_1': 6}	hexameric	6	PISA	author_and_software_defined_assembly
451	1Q51	1q51-assembly2.cif	{'ent_1': 6}	hexameric	6	PISA	author_and_software_defined_assembly
452	1Q50	1q50-assembly1.cif	{'ent_1': 2}	dimeric	2	PISA,PQS	author_and_software_defined_assembly
453	1Q52	1q52-assembly1.cif	{'ent_1': 6}	hexameric	6	PISA	author_and_software_defined_assembly
454	1Q52	1q52-assembly2.cif	{'ent_1': 6}	hexameric	6	PISA	author_and_software_defined_assembly
455	1QHF	1qhf-assembly1.cif	{'ent_1': 4}	tetrameric	4	?	author_defined_assembly
456	7R0I	7r0i-assembly1.cif	{'ent_1': 1}	monomeric	1	?	author_defined_assembly
457	7R0H	7r0h-assembly1.cif	{'ent_1': 1}	monomeric	1	?	author_defined_assembly
458	1QHG	1qhg-assembly1.cif	{'ent_1': 1}	monomeric	1	?	author_defined_assembly
459	4GG9	4gg9-assembly1.cif	{'ent_1': 2}	dimeric	2	PISA	author_and_software_defined_assembly
460	7R0G	7r0g-assembly1.cif	{'ent_1': 1}	monomeric	1	?	author_defined_assembly
461	7R0G	7r0g-assembly2.cif	{'ent_1': 1}	monomeric	1	?	author_defined_assembly
462	7R0F	7r0f-assembly1.cif	{'ent_1': 2}	dimeric	2	PISA	author_and_software_defined_assembly
463	7R0F	7r0f-assembly2.cif	{'ent_1': 2}	dimeric	2	PISA	author_and_software_defined_assembly
464	4QFL	4qfl-assembly1.cif	{'ent_1': 1}	monomeric	1	PISA	author_and_software_defined_assembly
465	4QFL	4qfl-assembly2.cif	{'ent_1': 1}	monomeric	1	PISA	author_and_software_defined_assembly
466	2ZSM	2zsm-assembly1.cif	{'ent_1': 2}	dimeric	2	PISA	author_and_software_defined_assembly
467	2ZSM	2zsm-assembly2.cif	{'ent_1': 2}	dimeric	2	PISA	author_and_software_defined_assembly
468	5WHY	5why-assembly1.cif	{'ent_1': 1}	monomeric	1	PISA	author_and_software_defined_assembly
469	5WHY	5why-assembly2.cif	{'ent_1': 1}	monomeric	1	PISA	author_and_software_defined_assembly
470	3APQ	3apq-assembly1.cif	{'ent_1': 1}	monomeric	1	PISA	author_and_software_defined_assembly
471	3APQ	3apq-assembly2.cif	{'ent_1': 1}	monomeric	1	PISA	author_and_software_defined_assembly
472	3GA5	3ga5-assembly1.cif	{'ent_1': 1}	monomeric	1	PISA	author_and_software_defined_assembly
473	3GA5	3ga5-assembly2.cif	{'ent_1': 1}	monomeric	1	PISA	author_and_software_defined_assembly
474	4QFW	4qfw-assembly1.cif	{'ent_1': 4}	tetrameric	4	PISA	author_and_software_defined_assembly
475	4QFW	4qfw-assembly2.cif	{'ent_1': 2}	dimeric	2	PISA	author_and_software_defined_assembly
476	4QFW	4qfw-assembly3.cif	{'ent_1': 2}	dimeric	2	PISA	author_and_software_defined_assembly
477	3GA7	3ga7-assembly1.cif	{'ent_1': 1}	monomeric	1	?	author_defined_assembly
478	3GA6	3ga6-assembly1.cif	{'ent_3': 1, 'ent_2': 1, 'ent_1': 1}	trimeric	3	?	author_defined_assembly
479	3GA6	3ga6-assembly2.cif	{'ent_3': 1, 'ent_2': 1, 'ent_1': 1}	trimeric	3	?	author_defined_assembly
480	3GA0	3ga0-assembly1.cif	{'ent_1': 1}	monomeric	1	?	author_defined_assembly
481	3GA0	3ga0-assembly2.cif	{'ent_1': 2}	dimeric	2	PISA	software_defined_assembly
482	4QFV	4qfv-assembly1.cif	{'ent_1': 2}	dimeric	2	PISA	software_defined_assembly
483	4QFV	4qfv-assembly2.cif	{'ent_1': 2}	dimeric	2	PISA	software_defined_assembly
484	3GA9	3ga9-assembly1.cif	{'ent_2': 1, 'ent_1': 1}	dimeric	2	PISA	author_and_software_defined_assembly
485	3GA8	3ga8-assembly1.cif	{'ent_1': 1}	monomeric	1	PISA	author_and_software_defined_assembly
486	3HG7	3hg7-assembly1.cif	{'ent_1': 1}	monomeric	1	?	author_defined_assembly
487	3HG7	3hg7-assembly2.cif	{'ent_1': 2}	dimeric	2	PISA	author_and_software_defined_assembly
488	1JH9	1jh9-assembly1.cif	{'ent_2': 2, 'ent_1': 2}	tetrameric	4	?	author_defined_assembly
489	1JH8	1jh8-assembly1.cif	{'ent_1': 2}	dimeric	2	PISA,PQS	author_and_software_defined_assembly
490	6KU2	6ku2-assembly1.cif	{'ent_1': 1}	monomeric	1	PISA	author_and_software_defined_assembly
491	6KU2	6ku2-assembly2.cif	{'ent_1': 1}	monomeric	1	PISA	author_and_software_defined_assembly
492	1JH3	1jh3-assembly1.cif	{'ent_1': 1}	monomeric	1	?	author_defined_assembly
493	6KU1	6ku1-assembly1.cif	{'ent_1': 1}	monomeric	1	PISA	author_and_software_defined_assembly
494	6KU1	6ku1-assembly2.cif	{'ent_1': 1}	monomeric	1	PISA	author_and_software_defined_assembly
495	1JHM	1jhm-assembly1.cif	{'ent_1': 2}	dimeric	2	PISA,PQS	author_and_software_defined_assembly
496	3HGZ	3hgz-assembly1.cif	{'ent_2': 1, 'ent_1': 1}	dimeric	2	PISA	author_and_software_defined_assembly
497	3HGZ	3hgz-assembly2.cif	{'ent_2': 1, 'ent_1': 1}	dimeric	2	PISA	author_and_software_defined_assembly
498	6KUM	6kum-assembly1.cif	{'ent_1': 1}	monomeric	1	PISA	author_and_software_defined_assembly
499	6KUM	6kum-assembly2.cif	{'ent_1': 1}	monomeric	1	PISA	author_and_software_defined_assembly
500	1JHH	1jhh-assembly1.cif	{'ent_1': 2}	dimeric	2	?	author_defined_assembly
501	3GAR	3gar-assembly1.cif	{'ent_1': 2}	dimeric	2	?	author_defined_assembly
502	1JHE	1jhe-assembly1.cif	{'ent_1': 2}	dimeric	2	?	author_defined_assembly
503	6KUG	6kug-assembly1.cif	{'ent_2': 1, 'ent_1': 1}	dimeric	2	PISA	author_and_software_defined_assembly
504	1JHG	1jhg-assembly1.cif	{'ent_1': 2}	dimeric	2	PISA,PQS	author_and_software_defined_assembly
505	1JHF	1jhf-assembly1.cif	{'ent_1': 2}	dimeric	2	?	author_defined_assembly
506	3GAY	3gay-assembly1.cif	{'ent_1': 2}	dimeric	2	PISA	author_and_software_defined_assembly
507	1JHC	1jhc-assembly1.cif	{'ent_1': 2}	dimeric	2	?	author_defined_assembly
508	6KUA	6kua-assembly1.cif	{'ent_1': 4}	tetrameric	4	?	author_defined_assembly
509	6KUA	6kua-assembly2.cif	{'ent_1': 4}	tetrameric	4	?	author_defined_assembly
510	3GAG	3gag-assembly1.cif	{'ent_1': 2}	dimeric	2	PISA	author_and_software_defined_assembly
511	3GAG	3gag-assembly2.cif	{'ent_1': 2}	dimeric	2	PISA	author_and_software_defined_assembly
512	3GAF	3gaf-assembly1.cif	{'ent_1': 4}	tetrameric	4	PISA	author_and_software_defined_assembly
513	3GAF	3gaf-assembly2.cif	{'ent_1': 4}	tetrameric	4	PISA	author_and_software_defined_assembly
514	6KUZ	6kuz-assembly1.cif	{'ent_1': 4}	tetrameric	4	PISA	author_and_software_defined_assembly
515	6KUZ	6kuz-assembly2.cif	{'ent_1': 4}	tetrameric	4	PISA	author_and_software_defined_assembly
516	1JHX	1jhx-assembly1.cif	{'ent_1': 2}	dimeric	2	PISA,PQS	author_and_software_defined_assembly
517	1JHZ	1jhz-assembly1.cif	{'ent_1': 2}	dimeric	2	PISA	author_and_software_defined_assembly
518	3GAM	3gam-assembly1.cif	{'ent_1': 2}	dimeric	2	PISA	author_and_software_defined_assembly
519	6KUW	6kuw-assembly1.cif	{'ent_1': 2}	dimeric	2	PISA	author_and_software_defined_assembly
520	3HGB	3hgb-assembly1.cif	{'ent_1': 1}	monomeric	1	PISA	author_and_software_defined_assembly
521	1JHV	1jhv-assembly1.cif	{'ent_1': 2}	dimeric	2	PISA,PQS	author_and_software_defined_assembly
522	1JHQ	1jhq-assembly1.cif	{'ent_1': 2}	dimeric	2	PISA,PQS	author_and_software_defined_assembly
523	1JHP	1jhp-assembly1.cif	{'ent_1': 2}	dimeric	2	PISA,PQS	author_and_software_defined_assembly
524	3GAK	3gak-assembly1.cif	{'ent_1': 2}	dimeric	2	PISA	author_and_software_defined_assembly
525	1JHR	1jhr-assembly1.cif	{'ent_1': 2}	dimeric	2	PISA,PQS	author_and_software_defined_assembly
526	3M1X	3m1x-assembly1.cif	{'ent_1': 3}	trimeric	3	PISA	author_and_software_defined_assembly
527	4JX1	4jx1-assembly1.cif	{'ent_2': 1, 'ent_1': 1}	dimeric	2	?	author_defined_assembly
528	4JX1	4jx1-assembly2.cif	{'ent_2': 1, 'ent_1': 1}	dimeric	2	?	author_defined_assembly
529	4JX1	4jx1-assembly3.cif	{'ent_2': 1, 'ent_1': 1}	dimeric	2	?	author_defined_assembly
530	4JX1	4jx1-assembly4.cif	{'ent_2': 1, 'ent_1': 1}	dimeric	2	?	author_defined_assembly
531	1JQ5	1jq5-assembly1.cif	{'ent_1': 8}	octameric	8	PISA,PQS	author_and_software_defined_assembly
532	3HYO	3hyo-assembly1.cif	{'ent_1': 1}	monomeric	1	PISA	author_and_software_defined_assembly
533	1S3D	1s3d-assembly1.cif	{'ent_1': 1}	monomeric	1	PQS	author_and_software_defined_assembly
534	1S3D	1s3d-assembly2.cif	{'ent_1': 2}	dimeric	2	PISA	software_defined_assembly
535	3RY7	3ry7-assembly1.cif	{'ent_1': 2}	dimeric	2	PISA	author_and_software_defined_assembly
536	3RY3	3ry3-assembly1.cif	{'ent_1': 1}	monomeric	1	PISA	author_and_software_defined_assembly
537	3RY3	3ry3-assembly2.cif	{'ent_1': 1}	monomeric	1	PISA	author_and_software_defined_assembly
538	3AW9	3aw9-assembly1.cif	{'ent_1': 2}	dimeric	2	PISA	author_and_software_defined_assembly
539	3AW9	3aw9-assembly2.cif	{'ent_1': 2}	dimeric	2	PISA	author_and_software_defined_assembly
540	3AW8	3aw8-assembly1.cif	{'ent_1': 2}	dimeric	2	PISA	author_and_software_defined_assembly
541	4TWB	4twb-assembly1.cif	{'ent_1': 2}	Dimeric	2	PISA	author_and_software_defined_assembly
542	4TWB	4twb-assembly2.cif	{'ent_1': 2}	Dimeric	2	PISA	author_and_software_defined_assembly
543	4TWB	4twb-assembly3.cif	{'ent_1': 2}	Dimeric	2	PISA	author_and_software_defined_assembly
544	1IF2	1if2-assembly1.cif	{'ent_1': 2}	dimeric	2	PISA,PQS	author_and_software_defined_assembly
545	7UJB	7ujb-assembly1.cif	{'ent_1': 1}	monomeric	1	?	author_defined_assembly
546	7UJB	7ujb-assembly2.cif	{'ent_1': 1}	monomeric	1	?	author_defined_assembly
547	7UJB	7ujb-assembly3.cif	{'ent_1': 1}	monomeric	1	?	author_defined_assembly
548	7UJB	7ujb-assembly4.cif	{'ent_1': 1}	monomeric	1	?	author_defined_assembly
549	4TWZ	4twz-assembly1.cif	{'ent_1': 1}	monomeric	1	PISA	author_and_software_defined_assembly
550	6RI9	6ri9-assembly1.cif	{'ent_3': 2, 'ent_2': 1, 'ent_1': 1, 'ent_7': 1, 'ent_6': 1, 'ent_5': 1, 'ent_4': 1}	octameric	8	PISA	author_and_software_defined_assembly
551	6RI7	6ri7-assembly1.cif	{'ent_8': 1, 'ent_3': 2, 'ent_2': 1, 'ent_1': 1, 'ent_7': 1, 'ent_6': 1, 'ent_5': 1, 'ent_4': 2}	nonameric	9	PISA	author_and_software_defined_assembly
552	4TWR	4twr-assembly1.cif	{'ent_1': 1}	monomeric	1	PISA	author_and_software_defined_assembly
553	6RIN	6rin-assembly1.cif	{'ent_8': 1, 'ent_3': 1, 'ent_2': 1, 'ent_1': 1, 'ent_7': 1, 'ent_6': 1, 'ent_5': 1, 'ent_4': 2}	nonameric	9	PISA	software_defined_assembly
554	1IFX	1ifx-assembly1.cif	{'ent_1': 2}	dimeric	2	PISA	author_and_software_defined_assembly
555	6RIH	6rih-assembly1.cif	{'ent_1': 2}	dimeric	2	PISA	author_and_software_defined_assembly
556	3AWI	3awi-assembly1.cif	{'ent_1': 1}	monomeric	1	PISA	author_and_software_defined_assembly
557	3AWI	3awi-assembly2.cif	{'ent_1': 1}	monomeric	1	PISA	author_and_software_defined_assembly
558	3AWI	3awi-assembly3.cif	{'ent_1': 1}	monomeric	1	PISA	author_and_software_defined_assembly
559	3AWI	3awi-assembly4.cif	{'ent_1': 1}	monomeric	1	PISA	author_and_software_defined_assembly
560	3AWI	3awi-assembly5.cif	{'ent_1': 1}	monomeric	1	PISA	author_and_software_defined_assembly
561	3AWI	3awi-assembly6.cif	{'ent_1': 1}	monomeric	1	PISA	author_and_software_defined_assembly
562	6RIV	6riv-assembly1.cif	{'ent_1': 2}	dimeric	2	PISA	author_and_software_defined_assembly
563	1IFG	1ifg-assembly1.cif	{'ent_1': 1}	monomeric	1	?	author_defined_assembly
564	6RIQ	6riq-assembly1.cif	{'ent_2': 11, 'ent_1': 11}	22-meric	22	PISA	author_and_software_defined_assembly
565	6RIP	6rip-assembly1.cif	{'ent_3': 2, 'ent_2': 1, 'ent_1': 1, 'ent_7': 1, 'ent_6': 1, 'ent_5': 1, 'ent_4': 1}	octameric	8	PISA	author_and_software_defined_assembly
566	3M13	3m13-assembly1.cif	{'ent_1': 1}	monomeric	1	PISA	author_and_software_defined_assembly
567	3M13	3m13-assembly2.cif	{'ent_1': 1}	monomeric	1	PISA	author_and_software_defined_assembly
568	3M13	3m13-assembly3.cif	{'ent_1': 1}	monomeric	1	PISA	author_and_software_defined_assembly
569	3M13	3m13-assembly4.cif	{'ent_1': 1}	monomeric	1	PISA	author_and_software_defined_assembly
570	3M12	3m12-assembly1.cif	{'ent_1': 1}	monomeric	1	PISA	author_and_software_defined_assembly
571	3M12	3m12-assembly2.cif	{'ent_1': 1}	monomeric	1	PISA	author_and_software_defined_assembly
572	3RYD	3ryd-assembly1.cif	{'ent_1': 2}	dimeric	2	?	author_defined_assembly
573	3RYP	3ryp-assembly1.cif	{'ent_1': 2}	dimeric	2	PISA	author_and_software_defined_assembly
574	3RYR	3ryr-assembly1.cif	{'ent_1': 2}	dimeric	2	PISA	author_and_software_defined_assembly
575	3RYS	3rys-assembly1.cif	{'ent_1': 1}	monomeric	1	PISA	author_and_software_defined_assembly
576	3RYS	3rys-assembly2.cif	{'ent_1': 1}	monomeric	1	PISA	author_and_software_defined_assembly
577	4ZJL	4zjl-assembly1.cif	{'ent_1': 3}	trimeric	3	PISA	author_and_software_defined_assembly
578	4ZJL	4zjl-assembly2.cif	{'ent_1': 3}	trimeric	3	PISA	author_and_software_defined_assembly
579	4WV3	4wv3-assembly1.cif	{'ent_1': 1}	monomeric	1	PISA	author_and_software_defined_assembly
580	4WV3	4wv3-assembly2.cif	{'ent_1': 1}	monomeric	1	PISA	author_and_software_defined_assembly
581	5B64	5b64-assembly1.cif	{'ent_2': 1, 'ent_1': 1}	dimeric	2	PISA	author_and_software_defined_assembly
582	5B63	5b63-assembly1.cif	{'ent_2': 2, 'ent_1': 2}	tetrameric	4	?	author_defined_assembly
583	5B63	5b63-assembly2.cif	{'ent_2': 1, 'ent_1': 1}	dimeric	2	PISA	software_defined_assembly
584	5B63	5b63-assembly3.cif	{'ent_2': 1, 'ent_1': 1}	dimeric	2	PISA	software_defined_assembly
585	2V93	2v93-assembly1.cif	{'ent_1': 1}	monomeric	1	?	author_defined_assembly
586	5B68	5b68-assembly1.cif	{'ent_1': 1}	monomeric	1	?	author_defined_assembly
587	4CB0	4cb0-assembly1.cif	{'ent_1': 2}	dimeric	2	PISA	author_and_software_defined_assembly
588	2LIV	2liv-assembly1.cif	{'ent_1': 1}	monomeric	1	?	author_defined_assembly
589	4CBQ	4cbq-assembly1.cif	{'ent_1': 2}	dimeric	2	PISA	author_and_software_defined_assembly
590	2WCI	2wci-assembly1.cif	{'ent_1': 4}	tetrameric	4	PISA	software_defined_assembly
591	2WCI	2wci-assembly2.cif	{'ent_1': 2}	dimeric	2	PISA	author_and_software_defined_assembly
592	2LIG	2lig-assembly1.cif	{'ent_1': 2}	dimeric	2	PISA	author_and_software_defined_assembly
593	4CBB	4cbb-assembly1.cif	{'ent_1': 4}	tetrameric	4	PISA	author_and_software_defined_assembly
594	4CBB	4cbb-assembly2.cif	{'ent_1': 4}	tetrameric	4	PISA	author_and_software_defined_assembly
595	2V9O	2v9o-assembly1.cif	{'ent_1': 4}	tetrameric	4	PQS	author_and_software_defined_assembly
596	2V9O	2v9o-assembly2.cif	{'ent_1': 4}	tetrameric	4	PQS	software_defined_assembly
597	2V9N	2v9n-assembly1.cif	{'ent_1': 4}	tetrameric	4	PQS	author_and_software_defined_assembly
598	2V9M	2v9m-assembly1.cif	{'ent_1': 4}	tetrameric	4	PQS	author_and_software_defined_assembly
599	2V9M	2v9m-assembly2.cif	{'ent_1': 4}	tetrameric	4	PQS	author_and_software_defined_assembly
600	2V9L	2v9l-assembly1.cif	{'ent_1': 4}	tetrameric	4	PQS	author_and_software_defined_assembly
601	4NNH	4nnh-assembly1.cif	{'ent_1': 1}	monomeric	1	PISA	author_and_software_defined_assembly
602	4NNH	4nnh-assembly2.cif	{'ent_1': 1}	monomeric	1	PISA	author_and_software_defined_assembly
603	4NNI	4nni-assembly1.cif	{'ent_1': 1}	monomeric	1	PISA	author_and_software_defined_assembly
604	4NNI	4nni-assembly2.cif	{'ent_1': 1}	monomeric	1	PISA	author_and_software_defined_assembly
605	2V9I	2v9i-assembly1.cif	{'ent_1': 4}	tetrameric	4	PQS	author_and_software_defined_assembly
606	2V9I	2v9i-assembly2.cif	{'ent_1': 4}	tetrameric	4	PQS	author_and_software_defined_assembly
607	4NNK	4nnk-assembly1.cif	{'ent_1': 1}	monomeric	1	PISA	author_and_software_defined_assembly
608	4WVI	4wvi-assembly1.cif	{'ent_2': 1, 'ent_1': 1}	dimeric	2	PISA	author_and_software_defined_assembly
609	4WVH	4wvh-assembly1.cif	{'ent_2': 1, 'ent_1': 1}	dimeric	2	PISA	author_and_software_defined_assembly
610	2V9E	2v9e-assembly1.cif	{'ent_1': 4}	tetrameric	4	PQS	author_and_software_defined_assembly
611	2V9E	2v9e-assembly2.cif	{'ent_1': 4}	tetrameric	4	PQS	author_and_software_defined_assembly
612	2V9D	2v9d-assembly1.cif	{'ent_1': 4}	tetrameric	4	PQS	author_and_software_defined_assembly
613	2V9C	2v9c-assembly1.cif	{'ent_1': 2}	dimeric	2	PISA	author_and_software_defined_assembly
614	5B6J	5b6j-assembly1.cif	{'ent_1': 1}	monomeric	1	?	author_defined_assembly
615	5B6J	5b6j-assembly2.cif	{'ent_1': 1}	monomeric	1	?	author_defined_assembly
616	1G0N	1g0n-assembly1.cif	{'ent_1': 4}	tetrameric	4	PISA,PQS	author_and_software_defined_assembly
617	5B6H	5b6h-assembly1.cif	{'ent_1': 2}	dimeric	2	PISA	author_and_software_defined_assembly
618	1G0R	1g0r-assembly1.cif	{'ent_1': 4}	tetrameric	4	PQS	author_and_software_defined_assembly
619	1G0R	1g0r-assembly2.cif	{'ent_1': 4}	tetrameric	4	PQS	author_and_software_defined_assembly
620	1G0S	1g0s-assembly1.cif	{'ent_1': 2}	dimeric	2	PISA	author_and_software_defined_assembly
621	1G0T	1g0t-assembly1.cif	{'ent_1': 2}	dimeric	2	PISA	author_and_software_defined_assembly
622	2V9Y	2v9y-assembly1.cif	{'ent_1': 2}	dimeric	2	PQS	author_and_software_defined_assembly
623	2V9Y	2v9y-assembly2.cif	{'ent_1': 2}	dimeric	2	PQS	author_and_software_defined_assembly
624	2V9X	2v9x-assembly1.cif	{'ent_1': 6}	hexameric	6	PQS	author_and_software_defined_assembly
625	2V9X	2v9x-assembly2.cif	{'ent_1': 6}	hexameric	6	PQS	author_and_software_defined_assembly
626	4WVX	4wvx-assembly1.cif	{'ent_1': 2}	dimeric	2	PISA	author_and_software_defined_assembly
627	4NNR	4nnr-assembly1.cif	{'ent_1': 1}	monomeric	1	PISA	author_and_software_defined_assembly
628	4NNR	4nnr-assembly2.cif	{'ent_1': 1}	monomeric	1	PISA	author_and_software_defined_assembly
629	4PX2	4px2-assembly1.cif	{'ent_1': 1}	monomeric	1	PISA	author_and_software_defined_assembly
630	4PX2	4px2-assembly2.cif	{'ent_1': 1}	monomeric	1	PISA	author_and_software_defined_assembly
631	4PX3	4px3-assembly1.cif	{'ent_1': 1}	monomeric	1	PISA	author_and_software_defined_assembly
632	4PX3	4px3-assembly2.cif	{'ent_1': 1}	monomeric	1	PISA	author_and_software_defined_assembly
633	4PX5	4px5-assembly1.cif	{'ent_1': 1}	monomeric	1	PISA	author_and_software_defined_assembly
634	4PX5	4px5-assembly2.cif	{'ent_1': 1}	monomeric	1	PISA	author_and_software_defined_assembly
635	4PX7	4px7-assembly1.cif	{'ent_1': 1}	monomeric	1	PISA	author_and_software_defined_assembly
636	3BGE	3bge-assembly1.cif	{'ent_1': 8}	octameric	8	PISA	author_and_software_defined_assembly
637	2XO5	2xo5-assembly1.cif	{'ent_2': 6, 'ent_1': 6}	dodecameric	12	PISA	software_defined_assembly
638	2XO5	2xo5-assembly2.cif	{'ent_2': 6, 'ent_1': 6}	dodecameric	12	PISA	software_defined_assembly
639	2XO5	2xo5-assembly3.cif	{'ent_2': 5, 'ent_1': 1}	monomeric	1	PISA	software_defined_assembly
640	2XO4	2xo4-assembly1.cif	{'ent_2': 6, 'ent_1': 6}	dodecameric	12	PISA	software_defined_assembly
641	2XO4	2xo4-assembly2.cif	{'ent_2': 6, 'ent_1': 6}	dodecameric	12	PISA	software_defined_assembly
642	2XO4	2xo4-assembly3.cif	{'ent_2': 3, 'ent_1': 1}	monomeric	1	PISA	software_defined_assembly
643	7VTG	7vtg-assembly1.cif	{'ent_1': 2}	dimeric	2	PISA	author_and_software_defined_assembly
644	7VTG	7vtg-assembly2.cif	{'ent_1': 2}	dimeric	2	PISA	author_and_software_defined_assembly
645	7VTF	7vtf-assembly1.cif	{'ent_1': 2}	dimeric	2	PISA	author_and_software_defined_assembly
646	7VTF	7vtf-assembly2.cif	{'ent_1': 2}	dimeric	2	PISA	author_and_software_defined_assembly
647	7VTE	7vte-assembly1.cif	{'ent_1': 2}	dimeric	2	PISA	author_and_software_defined_assembly
648	7VTE	7vte-assembly2.cif	{'ent_1': 2}	dimeric	2	PISA	author_and_software_defined_assembly
649	1X3U	1x3u-assembly1.cif	{'ent_1': 1}	monomeric	1	?	author_defined_assembly
650	3P2U	3p2u-assembly1.cif	{'ent_1': 2}	dimeric	2	PISA	author_and_software_defined_assembly
651	3P2O	3p2o-assembly1.cif	{'ent_1': 2}	dimeric	2	PISA	author_and_software_defined_assembly
652	7VTR	7vtr-assembly1.cif	{'ent_1': 4}	tetrameric	4	PISA	author_and_software_defined_assembly
653	3P2M	3p2m-assembly1.cif	{'ent_1': 1}	monomeric	1	PISA	author_and_software_defined_assembly
654	3P2L	3p2l-assembly1.cif	{'ent_1': 14}	tetradecameric	14	PISA	author_and_software_defined_assembly
655	1X3F	1x3f-assembly1.cif	{'ent_1': 4}	tetrameric	4	PISA,PQS	author_and_software_defined_assembly
656	1X3G	1x3g-assembly1.cif	{'ent_1': 4}	tetrameric	4	?	author_defined_assembly
657	7CTA	7cta-assembly1.cif	{'ent_1': 4}	tetrameric	4	?	author_defined_assembly
658	7CTN	7ctn-assembly1.cif	{'ent_1': 1}	monomeric	1	?	author_defined_assembly
659	7CTN	7ctn-assembly2.cif	{'ent_1': 1}	monomeric	1	?	author_defined_assembly
660	7VTZ	7vtz-assembly1.cif	{'ent_1': 1}	monomeric	1	?	author_defined_assembly
661	7CTL	7ctl-assembly1.cif	{'ent_1': 2}	dimeric	2	PISA	author_and_software_defined_assembly
662	7CTM	7ctm-assembly1.cif	{'ent_1': 2}	dimeric	2	PISA	author_and_software_defined_assembly
663	1X3N	1x3n-assembly1.cif	{'ent_1': 2}	dimeric	2	PISA,PQS	author_and_software_defined_assembly
664	3P2A	3p2a-assembly1.cif	{'ent_1': 1}	monomeric	1	?	author_defined_assembly
665	3P2A	3p2a-assembly2.cif	{'ent_1': 1}	monomeric	1	?	author_defined_assembly
666	3P2A	3p2a-assembly3.cif	{'ent_1': 1}	monomeric	1	?	author_defined_assembly
667	3P2A	3p2a-assembly4.cif	{'ent_1': 1}	monomeric	1	?	author_defined_assembly
668	3P2A	3p2a-assembly5.cif	{'ent_1': 2}	dimeric	2	PISA	software_defined_assembly
669	3P2A	3p2a-assembly6.cif	{'ent_1': 2}	dimeric	2	PISA	software_defined_assembly
670	1X3M	1x3m-assembly1.cif	{'ent_1': 2}	dimeric	2	PISA,PQS	author_and_software_defined_assembly
671	7CT6	7ct6-assembly1.cif	{'ent_1': 2}	dimeric	2	PISA	author_and_software_defined_assembly
672	7CT7	7ct7-assembly1.cif	{'ent_1': 2}	dimeric	2	PISA	author_and_software_defined_assembly
673	1X31	1x31-assembly1.cif	{'ent_3': 1, 'ent_2': 1, 'ent_1': 1, 'ent_4': 1}	tetrameric	4	PISA	author_and_software_defined_assembly
674	1X31	1x31-assembly2.cif	{'ent_3': 2, 'ent_2': 2, 'ent_1': 2, 'ent_4': 2}	octameric	8	PISA	software_defined_assembly
675	1X31	1x31-assembly3.cif	{'ent_3': 2, 'ent_2': 2, 'ent_1': 2, 'ent_4': 2}	octameric	8	PISA	software_defined_assembly
676	1X37	1x37-assembly1.cif	{'ent_1': 1}	monomeric	1	?	author_defined_assembly
677	3P27	3p27-assembly1.cif	{'ent_1': 1}	monomeric	1	PISA	author_and_software_defined_assembly
678	3P27	3p27-assembly2.cif	{'ent_1': 1}	monomeric	1	PISA	author_and_software_defined_assembly
679	3P26	3p26-assembly1.cif	{'ent_1': 1}	monomeric	1	PISA	author_and_software_defined_assembly
680	3P26	3p26-assembly2.cif	{'ent_1': 1}	monomeric	1	PISA	author_and_software_defined_assembly
681	7CT8	7ct8-assembly1.cif	{'ent_1': 4}	tetrameric	4	PISA	author_and_software_defined_assembly
682	7CT9	7ct9-assembly1.cif	{'ent_1': 4}	tetrameric	4	PISA	author_and_software_defined_assembly
683	1OYZ	1oyz-assembly1.cif	{'ent_1': 1}	monomeric	1	?	author_defined_assembly
684	7VT9	7vt9-assembly1.cif	{'ent_1': 2}	dimeric	2	PISA	author_and_software_defined_assembly
685	4PXS	4pxs-assembly1.cif	{'ent_1': 1}	monomeric	1	PISA	author_and_software_defined_assembly
686	4PXS	4pxs-assembly2.cif	{'ent_1': 1}	monomeric	1	PISA	author_and_software_defined_assembly
687	1P8F	1p8f-assembly1.cif	{'ent_1': 2}	dimeric	2	PISA,PQS	author_and_software_defined_assembly
688	2XOF	2xof-assembly1.cif	{'ent_1': 2}	dimeric	2	PISA	author_and_software_defined_assembly
689	2XOE	2xoe-assembly1.cif	{'ent_1': 1}	monomeric	1	PISA	author_and_software_defined_assembly
690	2XOD	2xod-assembly1.cif	{'ent_1': 1}	monomeric	1	PISA	author_and_software_defined_assembly
691	4PXA	4pxa-assembly1.cif	{'ent_1': 1}	monomeric	1	PISA	author_and_software_defined_assembly
692	4PXB	4pxb-assembly1.cif	{'ent_1': 2}	dimeric	2	PISA	author_and_software_defined_assembly
693	4PXC	4pxc-assembly1.cif	{'ent_1': 2}	dimeric	2	PISA	author_and_software_defined_assembly
694	4PXD	4pxd-assembly1.cif	{'ent_1': 2}	dimeric	2	PISA	author_and_software_defined_assembly
695	4PXE	4pxe-assembly1.cif	{'ent_1': 2}	dimeric	2	PISA	author_and_software_defined_assembly
696	4PXI	4pxi-assembly1.cif	{'ent_3': 1, 'ent_2': 1, 'ent_1': 4}	hexameric	6	PISA	author_and_software_defined_assembly
697	2XOW	2xow-assembly1.cif	{'ent_1': 1}	monomeric	1	PISA	author_and_software_defined_assembly
698	2XOV	2xov-assembly1.cif	{'ent_1': 1}	monomeric	1	PISA	author_and_software_defined_assembly
699	4PXN	4pxn-assembly1.cif	{'ent_1': 4}	tetrameric	4	PISA	author_and_software_defined_assembly
700	7XA4	7xa4-assembly1.cif	{'ent_1': 2}	dimeric	2	PISA	author_and_software_defined_assembly
701	7XA2	7xa2-assembly1.cif	{'ent_1': 2}	dimeric	2	PISA	author_and_software_defined_assembly
702	1L9C	1l9c-assembly1.cif	{'ent_1': 1}	monomeric	1	?	author_defined_assembly
703	1L9C	1l9c-assembly2.cif	{'ent_1': 1}	monomeric	1	?	author_defined_assembly
704	1L9D	1l9d-assembly1.cif	{'ent_1': 1}	monomeric	1	?	author_defined_assembly
705	1L9D	1l9d-assembly2.cif	{'ent_1': 1}	monomeric	1	?	author_defined_assembly
706	7EJW	7ejw-assembly1.cif	{'ent_2': 2, 'ent_1': 2}	tetrameric	4	PISA	author_and_software_defined_assembly
707	5DCB	5dcb-assembly1.cif	{'ent_1': 4}	tetrameric	4	PISA	author_and_software_defined_assembly
708	5DCA	5dca-assembly1.cif	{'ent_2': 1, 'ent_1': 1}	dimeric	2	PISA	software_defined_assembly
709	5DCF	5dcf-assembly1.cif	{'ent_1': 1}	monomeric	1	PISA	author_and_software_defined_assembly
710	3BGX	3bgx-assembly1.cif	{'ent_1': 2}	dimeric	2	PISA	author_and_software_defined_assembly
711	5DCD	5dcd-assembly1.cif	{'ent_1': 4}	tetrameric	4	?	author_defined_assembly
712	5DCE	5dce-assembly1.cif	{'ent_1': 4}	tetrameric	4	?	author_defined_assembly
713	7EJG	7ejg-assembly1.cif	{'ent_1': 1}	monomeric	1	PISA	author_and_software_defined_assembly
714	5DCL	5dcl-assembly1.cif	{'ent_1': 2}	dimeric	2	PISA	author_and_software_defined_assembly
715	5DCM	5dcm-assembly1.cif	{'ent_2': 1, 'ent_1': 1}	dimeric	2	PISA	author_and_software_defined_assembly
716	7EJ9	7ej9-assembly1.cif	{'ent_1': 2}	dimeric	2	?	author_defined_assembly
717	7EJ2	7ej2-assembly1.cif	{'ent_2': 4, 'ent_1': 4}	octameric	8	?	author_defined_assembly
718	7EJ3	7ej3-assembly1.cif	{'ent_1': 2}	dimeric	2	PISA	author_and_software_defined_assembly
719	7EJ1	7ej1-assembly1.cif	{'ent_2': 4, 'ent_1': 4}	octameric	8	?	author_defined_assembly
720	6PAB	6pab-assembly1.cif	{'ent_1': 4}	tetrameric	4	PISA	author_and_software_defined_assembly
721	6PAB	6pab-assembly2.cif	{'ent_1': 4}	tetrameric	4	PISA	author_and_software_defined_assembly
722	7SWK	7swk-assembly1.cif	{'ent_1': 2}	dimeric	2	PISA	author_and_software_defined_assembly
723	7XAO	7xao-assembly1.cif	{'ent_1': 2}	dimeric	2	PISA	author_and_software_defined_assembly
724	2Y99	2y99-assembly1.cif	{'ent_1': 4}	tetrameric	4	PISA	author_and_software_defined_assembly
725	3C37	3c37-assembly1.cif	{'ent_1': 1}	monomeric	1	PISA	author_and_software_defined_assembly
726	3C37	3c37-assembly2.cif	{'ent_1': 1}	monomeric	1	PISA	author_and_software_defined_assembly
727	1O20	1o20-assembly1.cif	{'ent_1': 1}	monomeric	1	PQS	author_and_software_defined_assembly
728	1O20	1o20-assembly2.cif	{'ent_1': 4}	tetrameric	4	PISA	software_defined_assembly
729	2Y90	2y90-assembly1.cif	{'ent_1': 6}	hexameric	6	PISA	author_and_software_defined_assembly
730	3C39	3c39-assembly1.cif	{'ent_1': 1}	monomeric	1	PISA	author_and_software_defined_assembly
731	3C39	3c39-assembly2.cif	{'ent_1': 1}	monomeric	1	PISA	author_and_software_defined_assembly
732	5ZHZ	5zhz-assembly1.cif	{'ent_1': 1}	monomeric	1	PISA	author_and_software_defined_assembly
733	5ZHE	5zhe-assembly1.cif	{'ent_1': 2}	dimeric	2	PISA	software_defined_assembly
734	5ZHH	5zhh-assembly1.cif	{'ent_1': 4}	tetrameric	4	PISA	author_and_software_defined_assembly
735	5ZHM	5zhm-assembly1.cif	{'ent_1': 2}	dimeric	2	PISA	author_and_software_defined_assembly
736	5ZHN	5zhn-assembly1.cif	{'ent_1': 2}	dimeric	2	PISA	author_and_software_defined_assembly
737	8EWU	8ewu-assembly1.cif	{'ent_1': 2}	dimeric	2	PISA	author_and_software_defined_assembly
738	8HIZ	8hiz-assembly1.cif	{'ent_1': 1}	monomeric	1	?	author_defined_assembly
739	8HIQ	8hiq-assembly1.cif	{'ent_1': 1}	monomeric	1	?	author_defined_assembly
740	8EWA	8ewa-assembly1.cif	{'ent_1': 2}	dimeric	2	PISA	author_and_software_defined_assembly
741	6M4Y	6m4y-assembly1.cif	{'ent_1': 2}	dimeric	2	PISA	author_and_software_defined_assembly
742	6M4W	6m4w-assembly1.cif	{'ent_3': 1, 'ent_2': 1, 'ent_1': 1}	trimeric	3	?	author_defined_assembly
743	6M4W	6m4w-assembly2.cif	{'ent_3': 1, 'ent_2': 1, 'ent_1': 1}	trimeric	3	?	author_defined_assembly
744	6M4W	6m4w-assembly3.cif	{'ent_3': 1, 'ent_2': 1, 'ent_1': 1}	trimeric	3	?	author_defined_assembly
745	6M4V	6m4v-assembly1.cif	{'ent_2': 1, 'ent_1': 1}	dimeric	2	PISA	author_and_software_defined_assembly
746	6M4V	6m4v-assembly2.cif	{'ent_2': 1, 'ent_1': 1}	dimeric	2	PISA	author_and_software_defined_assembly
747	6M4U	6m4u-assembly1.cif	{'ent_2': 1, 'ent_1': 1}	dimeric	2	?	author_defined_assembly
748	6M4U	6m4u-assembly2.cif	{'ent_2': 1, 'ent_1': 1}	dimeric	2	?	author_defined_assembly
749	8EWO	8ewo-assembly1.cif	{'ent_1': 1}	monomeric	1	?	author_defined_assembly
750	8EWO	8ewo-assembly2.cif	{'ent_1': 1}	monomeric	1	?	author_defined_assembly
751	8EWO	8ewo-assembly3.cif	{'ent_1': 1}	monomeric	1	?	author_defined_assembly
752	8EWH	8ewh-assembly1.cif	{'ent_1': 1}	monomeric	1	PISA	author_and_software_defined_assembly
753	8EWH	8ewh-assembly2.cif	{'ent_1': 1}	monomeric	1	PISA	author_and_software_defined_assembly
754	5JSC	5jsc-assembly1.cif	{'ent_1': 4}	tetrameric	4	PISA	author_and_software_defined_assembly
755	5JSC	5jsc-assembly2.cif	{'ent_1': 2}	dimeric	2	PISA	software_defined_assembly
756	5JSC	5jsc-assembly3.cif	{'ent_1': 2}	dimeric	2	PISA	software_defined_assembly
757	5JSC	5jsc-assembly4.cif	{'ent_1': 2}	dimeric	2	PISA	software_defined_assembly
758	5JSC	5jsc-assembly5.cif	{'ent_1': 2}	dimeric	2	PISA	software_defined_assembly
759	5JSF	5jsf-assembly1.cif	{'ent_1': 4}	tetrameric	4	PISA	author_and_software_defined_assembly
760	8EW3	8ew3-assembly1.cif	{'ent_3': 1, 'ent_2': 1, 'ent_1': 1, 'ent_6': 1, 'ent_5': 1, 'ent_4': 1}	hexameric	6	?	author_defined_assembly
761	5JST	5jst-assembly1.cif	{'ent_1': 2}	dimeric	2	?	author_defined_assembly
762	6D9A	6d9a-assembly1.cif	{'ent_1': 2}	dimeric	2	?	author_defined_assembly
763	5JSZ	5jsz-assembly1.cif	{'ent_3': 1, 'ent_2': 1, 'ent_1': 1, 'ent_4': 1}	tetrameric	4	PISA	author_and_software_defined_assembly
764	5JSZ	5jsz-assembly2.cif	{'ent_3': 1, 'ent_2': 1, 'ent_1': 1, 'ent_4': 1}	tetrameric	4	PISA	author_and_software_defined_assembly
765	3DKI	3dki-assembly1.cif	{'ent_1': 2}	dimeric	2	PISA	author_and_software_defined_assembly
766	5ZH3	5zh3-assembly1.cif	{'ent_1': 2}	dimeric	2	PISA	author_and_software_defined_assembly
767	5ZH2	5zh2-assembly1.cif	{'ent_1': 2}	dimeric	2	PISA	author_and_software_defined_assembly
768	3C3W	3c3w-assembly1.cif	{'ent_1': 2}	dimeric	2	PISA	author_and_software_defined_assembly
769	5ZH4	5zh4-assembly1.cif	{'ent_1': 2}	dimeric	2	PISA	author_and_software_defined_assembly
770	6D9B	6d9b-assembly1.cif	{'ent_1': 2}	dimeric	2	?	author_defined_assembly
771	1O2F	1o2f-assembly1.cif	{'ent_2': 1, 'ent_1': 1}	dimeric	2	?	author_defined_assembly
772	3C3B	3c3b-assembly1.cif	{'ent_1': 1}	monomeric	1	PISA	author_and_software_defined_assembly
773	3C3B	3c3b-assembly2.cif	{'ent_1': 1}	monomeric	1	PISA	author_and_software_defined_assembly
774	1O2D	1o2d-assembly1.cif	{'ent_1': 1}	monomeric	1	?	author_defined_assembly
775	1O2D	1o2d-assembly2.cif	{'ent_1': 1}	monomeric	1	?	author_defined_assembly
776	3C3K	3c3k-assembly1.cif	{'ent_1': 2}	dimeric	2	PISA	author_and_software_defined_assembly
777	3C3J	3c3j-assembly1.cif	{'ent_1': 2}	dimeric	2	PISA	author_and_software_defined_assembly
778	3C3J	3c3j-assembly2.cif	{'ent_1': 2}	dimeric	2	PISA	author_and_software_defined_assembly
779	3C3J	3c3j-assembly3.cif	{'ent_1': 2}	dimeric	2	PISA	author_and_software_defined_assembly
780	3C3I	3c3i-assembly1.cif	{'ent_1': 3}	trimeric	3	PISA	author_and_software_defined_assembly
781	3C3I	3c3i-assembly2.cif	{'ent_1': 3}	trimeric	3	PISA	author_and_software_defined_assembly
782	3C3N	3c3n-assembly1.cif	{'ent_1': 4}	tetrameric	4	PISA	software_defined_assembly
783	6K23	6k23-assembly1.cif	{'ent_1': 4}	tetrameric	4	PISA	author_and_software_defined_assembly
784	6LFC	6lfc-assembly1.cif	{'ent_1': 1}	monomeric	1	?	author_defined_assembly
785	6LFC	6lfc-assembly2.cif	{'ent_1': 1}	monomeric	1	?	author_defined_assembly
786	6LFC	6lfc-assembly3.cif	{'ent_1': 1}	monomeric	1	?	author_defined_assembly
787	6LFC	6lfc-assembly4.cif	{'ent_1': 1}	monomeric	1	?	author_defined_assembly
788	6LFC	6lfc-assembly5.cif	{'ent_1': 1}	monomeric	1	?	author_defined_assembly
789	6LFC	6lfc-assembly6.cif	{'ent_1': 1}	monomeric	1	?	author_defined_assembly
790	2Z26	2z26-assembly1.cif	{'ent_1': 2}	dimeric	2	?	author_defined_assembly
791	2Z27	2z27-assembly1.cif	{'ent_1': 2}	dimeric	2	?	author_defined_assembly
792	2Z24	2z24-assembly1.cif	{'ent_1': 2}	dimeric	2	?	author_defined_assembly
793	2Z25	2z25-assembly1.cif	{'ent_1': 2}	dimeric	2	?	author_defined_assembly
794	5CC5	5cc5-assembly1.cif	{'ent_1': 1}	monomeric	1	PISA	author_and_software_defined_assembly
795	2Z23	2z23-assembly1.cif	{'ent_2': 1, 'ent_1': 1}	dimeric	2	?	author_defined_assembly
796	5CC7	5cc7-assembly1.cif	{'ent_1': 1}	monomeric	1	PISA	author_and_software_defined_assembly
797	5CC6	5cc6-assembly1.cif	{'ent_1': 1}	monomeric	1	PISA	author_and_software_defined_assembly
798	5CC9	5cc9-assembly1.cif	{'ent_1': 1}	monomeric	1	PISA	author_and_software_defined_assembly
799	5CC8	5cc8-assembly1.cif	{'ent_1': 2}	dimeric	2	PISA	author_and_software_defined_assembly
800	3SF6	3sf6-assembly1.cif	{'ent_1': 4}	tetrameric	4	PISA	author_and_software_defined_assembly
801	2Z28	2z28-assembly1.cif	{'ent_1': 2}	dimeric	2	?	author_defined_assembly
802	2Z29	2z29-assembly1.cif	{'ent_1': 2}	dimeric	2	?	author_defined_assembly
803	3GZD	3gzd-assembly1.cif	{'ent_2': 2, 'ent_1': 2}	dimeric	2	PISA	author_and_software_defined_assembly
804	3GZD	3gzd-assembly2.cif	{'ent_2': 1, 'ent_1': 1}	dimeric	2	PISA	author_and_software_defined_assembly
805	5CCC	5ccc-assembly1.cif	{'ent_1': 1}	monomeric	1	PISA	author_and_software_defined_assembly
806	3GZG	3gzg-assembly1.cif	{'ent_1': 1}	monomeric	1	?	author_defined_assembly
807	3GZG	3gzg-assembly2.cif	{'ent_1': 1}	monomeric	1	?	author_defined_assembly
808	3GZG	3gzg-assembly3.cif	{'ent_1': 1}	monomeric	1	?	author_defined_assembly
809	2Z2B	2z2b-assembly1.cif	{'ent_1': 2}	dimeric	2	?	author_defined_assembly
810	2Z2C	2z2c-assembly1.cif	{'ent_1': 4}	tetrameric	4	PISA	author_and_software_defined_assembly
811	2Z2A	2z2a-assembly1.cif	{'ent_1': 2}	dimeric	2	?	author_defined_assembly
812	3SFD	3sfd-assembly1.cif	{'ent_3': 1, 'ent_2': 1, 'ent_1': 1, 'ent_4': 1}	tetrameric	4	PISA	author_and_software_defined_assembly
813	3SFE	3sfe-assembly1.cif	{'ent_3': 1, 'ent_2': 1, 'ent_1': 1, 'ent_4': 1}	tetrameric	4	PISA	author_and_software_defined_assembly
814	3GZN	3gzn-assembly1.cif	{'ent_3': 1, 'ent_2': 1, 'ent_1': 1}	trimeric	3	PISA	author_and_software_defined_assembly
815	3GZN	3gzn-assembly2.cif	{'ent_3': 1, 'ent_2': 1, 'ent_1': 1}	trimeric	3	PISA	author_and_software_defined_assembly
816	3GZH	3gzh-assembly1.cif	{'ent_1': 4}	tetrameric	4	PISA	author_and_software_defined_assembly
817	3GZH	3gzh-assembly2.cif	{'ent_1': 4}	tetrameric	4	PISA	software_defined_assembly
818	3SFT	3sft-assembly1.cif	{'ent_1': 1}	monomeric	1	PISA	author_and_software_defined_assembly
819	5CCZ	5ccz-assembly1.cif	{'ent_1': 1}	monomeric	1	PISA	author_and_software_defined_assembly
820	3GZX	3gzx-assembly1.cif	{'ent_2': 3, 'ent_1': 3}	hexameric	6	PISA	author_and_software_defined_assembly
821	3GZY	3gzy-assembly1.cif	{'ent_2': 3, 'ent_1': 3}	hexameric	6	PISA	author_and_software_defined_assembly
822	4RLI	4rli-assembly1.cif	{'ent_1': 1}	monomeric	1	PISA	author_and_software_defined_assembly
823	3L9W	3l9w-assembly1.cif	{'ent_1': 2}	dimeric	2	PISA	author_and_software_defined_assembly
824	6XI5	6xi5-assembly1.cif	{'ent_1': 2}	dimeric	2	PISA	author_and_software_defined_assembly
825	6XI4	6xi4-assembly1.cif	{'ent_1': 2}	dimeric	2	PISA	author_and_software_defined_assembly
826	1NB2	1nb2-assembly1.cif	{'ent_1': 6}	hexameric	6	?	author_defined_assembly
827	3L9X	3l9x-assembly1.cif	{'ent_1': 2}	dimeric	2	PISA	author_and_software_defined_assembly
828	3L9D	3l9d-assembly1.cif	{'ent_1': 1}	monomeric	1	?	author_defined_assembly
829	3L9D	3l9d-assembly2.cif	{'ent_1': 1}	monomeric	1	?	author_defined_assembly
830	3L9C	3l9c-assembly1.cif	{'ent_1': 1}	monomeric	1	?	author_defined_assembly
831	3L9C	3l9c-assembly2.cif	{'ent_1': 1}	monomeric	1	?	author_defined_assembly
832	4S3D	4s3d-assembly1.cif	{'ent_1': 2}	dimeric	2	PISA	author_and_software_defined_assembly
833	5IY7	5iy7-assembly1.cif	{'ent_29': 1, 'ent_20': 1, 'ent_9': 1, 'ent_21': 1, 'ent_3': 1, 'ent_2': 1, 'ent_1': 1, 'ent_7': 1, 'ent_6': 1, 'ent_5': 1, 'ent_4': 1, 'ent_22': 1, 'ent_23': 1, 'ent_19': 1, 'ent_18': 1, 'ent_26': 1, 'ent_27': 1, 'ent_24': 1, 'ent_25': 1, 'ent_13': 1, 'ent_12': 1, 'ent_11': 1, 'ent_10': 1, 'ent_17': 1, 'ent_16': 1, 'ent_15': 1, 'ent_14': 1, 'ent_8': 1, 'ent_28': 1}	29-meric	29	?	author_defined_assembly
834	5IY6	5iy6-assembly1.cif	{'ent_29': 1, 'ent_20': 1, 'ent_9': 1, 'ent_21': 1, 'ent_3': 1, 'ent_2': 1, 'ent_1': 1, 'ent_7': 1, 'ent_6': 1, 'ent_5': 1, 'ent_4': 1, 'ent_22': 1, 'ent_23': 1, 'ent_19': 1, 'ent_18': 1, 'ent_26': 1, 'ent_27': 1, 'ent_24': 1, 'ent_25': 1, 'ent_13': 1, 'ent_12': 1, 'ent_11': 1, 'ent_10': 1, 'ent_17': 1, 'ent_16': 1, 'ent_15': 1, 'ent_14': 1, 'ent_8': 1, 'ent_28': 1}	29-meric	29	?	author_defined_assembly
835	5IY9	5iy9-assembly1.cif	{'ent_29': 1, 'ent_20': 1, 'ent_9': 1, 'ent_21': 1, 'ent_3': 1, 'ent_2': 1, 'ent_1': 1, 'ent_7': 1, 'ent_6': 1, 'ent_5': 1, 'ent_4': 1, 'ent_22': 1, 'ent_23': 1, 'ent_19': 1, 'ent_18': 1, 'ent_26': 1, 'ent_27': 1, 'ent_24': 1, 'ent_25': 1, 'ent_13': 1, 'ent_12': 1, 'ent_11': 1, 'ent_10': 1, 'ent_17': 1, 'ent_16': 1, 'ent_15': 1, 'ent_14': 1, 'ent_8': 1, 'ent_28': 1}	29-meric	29	?	author_defined_assembly
836	5IY8	5iy8-assembly1.cif	{'ent_29': 1, 'ent_20': 1, 'ent_9': 1, 'ent_21': 1, 'ent_3': 1, 'ent_2': 1, 'ent_1': 1, 'ent_7': 1, 'ent_6': 1, 'ent_5': 1, 'ent_4': 1, 'ent_22': 1, 'ent_23': 1, 'ent_19': 1, 'ent_18': 1, 'ent_26': 1, 'ent_27': 1, 'ent_24': 1, 'ent_25': 1, 'ent_13': 1, 'ent_12': 1, 'ent_11': 1, 'ent_10': 1, 'ent_17': 1, 'ent_16': 1, 'ent_15': 1, 'ent_14': 1, 'ent_8': 1, 'ent_28': 1}	29-meric	29	?	author_defined_assembly
837	3AL0	3al0-assembly1.cif	{'ent_3': 1, 'ent_2': 1, 'ent_1': 1, 'ent_4': 1}	tetrameric	4	PISA	software_defined_assembly
838	2WC0	2wc0-assembly1.cif	{'ent_3': 1, 'ent_2': 1, 'ent_1': 1}	trimeric	3	PISA	author_and_software_defined_assembly
839	2WC0	2wc0-assembly2.cif	{'ent_3': 1, 'ent_2': 1, 'ent_1': 1}	trimeric	3	PISA	author_and_software_defined_assembly
840	2WC1	2wc1-assembly1.cif	{'ent_1': 1}	monomeric	1	PISA	software_defined_assembly
841	3ALJ	3alj-assembly1.cif	{'ent_1': 1}	monomeric	1	PISA	author_and_software_defined_assembly
842	3ALL	3all-assembly1.cif	{'ent_1': 1}	monomeric	1	PISA	author_and_software_defined_assembly
843	3ALL	3all-assembly2.cif	{'ent_1': 1}	monomeric	1	PISA	author_and_software_defined_assembly
844	3ALM	3alm-assembly1.cif	{'ent_1': 1}	monomeric	1	PISA	author_and_software_defined_assembly
845	3ALM	3alm-assembly2.cif	{'ent_1': 1}	monomeric	1	PISA	author_and_software_defined_assembly
846	1UWM	1uwm-assembly1.cif	{'ent_1': 1}	monomeric	1	PQS	author_and_software_defined_assembly
847	1UWF	1uwf-assembly1.cif	{'ent_1': 1}	monomeric	1	PQS	author_and_software_defined_assembly
848	1JUS	1jus-assembly1.cif	{'ent_1': 2}	dimeric	2	PISA	author_and_software_defined_assembly
849	1JUS	1jus-assembly2.cif	{'ent_1': 2}	dimeric	2	PISA	author_and_software_defined_assembly
850	1JUP	1jup-assembly1.cif	{'ent_1': 2}	dimeric	2	PISA	author_and_software_defined_assembly
851	1JUP	1jup-assembly2.cif	{'ent_1': 2}	dimeric	2	PISA	author_and_software_defined_assembly
852	1UWV	1uwv-assembly1.cif	{'ent_1': 1}	monomeric	1	PQS	author_and_software_defined_assembly
853	3NGL	3ngl-assembly1.cif	{'ent_1': 2}	dimeric	2	PISA	author_and_software_defined_assembly
854	6XIU	6xiu-assembly1.cif	{'ent_1': 2}	dimeric	2	?	author_defined_assembly
855	3L93	3l93-assembly1.cif	{'ent_1': 6}	hexameric	6	PISA	software_defined_assembly
856	3L93	3l93-assembly2.cif	{'ent_1': 3}	trimeric	3	PISA	software_defined_assembly
857	3L93	3l93-assembly3.cif	{'ent_1': 2}	dimeric	2	PISA	software_defined_assembly
858	6XIV	6xiv-assembly1.cif	{'ent_1': 2}	dimeric	2	PISA	author_and_software_defined_assembly
859	2WDO	2wdo-assembly1.cif	{'ent_1': 3}	trimeric	3	PISA	software_defined_assembly
860	6XIX	6xix-assembly1.cif	{'ent_1': 2}	dimeric	2	PISA	author_and_software_defined_assembly
861	6XIX	6xix-assembly2.cif	{'ent_1': 2}	dimeric	2	PISA	author_and_software_defined_assembly
862	6XIX	6xix-assembly3.cif	{'ent_1': 2}	dimeric	2	PISA	author_and_software_defined_assembly
863	6XIX	6xix-assembly4.cif	{'ent_1': 2}	dimeric	2	PISA	author_and_software_defined_assembly
864	4JXS	4jxs-assembly1.cif	{'ent_1': 1}	monomeric	1	?	author_defined_assembly
865	4JXS	4jxs-assembly2.cif	{'ent_1': 1}	monomeric	1	?	author_defined_assembly
866	4JXS	4jxs-assembly3.cif	{'ent_1': 2}	dimeric	2	PISA	software_defined_assembly
867	6XIZ	6xiz-assembly1.cif	{'ent_1': 1}	monomeric	1	PISA	author_and_software_defined_assembly
868	6XIZ	6xiz-assembly2.cif	{'ent_1': 1}	monomeric	1	PISA	author_and_software_defined_assembly
869	1NBU	1nbu-assembly1.cif	{'ent_3': 1, 'ent_2': 2, 'ent_1': 5}	octameric	8	PISA	author_and_software_defined_assembly
870	2O8N	2o8n-assembly1.cif	{'ent_1': 2}	dimeric	2	?	author_defined_assembly
871	1NBO	1nbo-assembly1.cif	{'ent_1': 4}	tetrameric	4	PISA,PQS	author_and_software_defined_assembly
872	1NBO	1nbo-assembly2.cif	{'ent_1': 4}	tetrameric	4	PISA,PQS	author_and_software_defined_assembly
873	1NBM	1nbm-assembly1.cif	{'ent_3': 1, 'ent_2': 2, 'ent_1': 3, 'ent_4': 1}	heptameric	7	PISA	author_and_software_defined_assembly
874	6XII	6xii-assembly1.cif	{'ent_49': 1, 'ent_65': 1, 'ent_9': 1, 'ent_8': 1, 'ent_59': 1, 'ent_3': 1, 'ent_2': 1, 'ent_1': 1, 'ent_58': 1, 'ent_7': 1, 'ent_6': 1, 'ent_5': 1, 'ent_4': 1, 'ent_31': 1, 'ent_30': 1, 'ent_19': 1, 'ent_32': 1, 'ent_35': 1, 'ent_34': 1, 'ent_37': 1, 'ent_36': 1, 'ent_13': 2, 'ent_12': 1, 'ent_11': 1, 'ent_10': 2, 'ent_17': 1, 'ent_16': 1, 'ent_15': 1, 'ent_14': 1, 'ent_57': 1, 'ent_61': 1, 'ent…	67-meric	67	?	author_defined_assembly
875	6XIJ	6xij-assembly1.cif	{'ent_49': 1, 'ent_9': 1, 'ent_8': 1, 'ent_59': 1, 'ent_3': 1, 'ent_2': 1, 'ent_1': 1, 'ent_58': 1, 'ent_7': 1, 'ent_6': 1, 'ent_5': 1, 'ent_4': 1, 'ent_31': 1, 'ent_30': 1, 'ent_19': 1, 'ent_32': 1, 'ent_35': 1, 'ent_34': 1, 'ent_37': 1, 'ent_36': 1, 'ent_13': 2, 'ent_12': 1, 'ent_11': 1, 'ent_10': 2, 'ent_17': 1, 'ent_16': 1, 'ent_15': 1, 'ent_14': 1, 'ent_57': 1, 'ent_61': 1, 'ent_56': 1, 'ent…	66-meric	66	?	author_defined_assembly
876	1NBE	1nbe-assembly1.cif	{'ent_2': 6, 'ent_1': 6}	dodecameric	12	PISA,PQS	author_and_software_defined_assembly
877	6XIN	6xin-assembly1.cif	{'ent_2': 2, 'ent_1': 2}	tetrameric	4	?	author_defined_assembly
878	6E1J	6e1j-assembly1.cif	{'ent_1': 2}	dimeric	2	PISA	author_and_software_defined_assembly
879	6E1C	6e1c-assembly1.cif	{'ent_1': 1}	monomeric	1	PISA	author_and_software_defined_assembly
880	6E1C	6e1c-assembly2.cif	{'ent_1': 1}	monomeric	1	PISA	author_and_software_defined_assembly
881	6E1X	6e1x-assembly1.cif	{'ent_1': 12}	dodecameric	12	PISA	author_and_software_defined_assembly
882	6E1X	6e1x-assembly2.cif	{'ent_1': 12}	dodecameric	12	PISA	author_and_software_defined_assembly
883	5DJF	5djf-assembly1.cif	{'ent_1': 1}	monomeric	1	PISA	author_and_software_defined_assembly
884	2O8F	2o8f-assembly1.cif	{'ent_3': 1, 'ent_2': 1, 'ent_1': 1, 'ent_4': 1}	tetrameric	4	?	author_defined_assembly
885	1SI7	1si7-assembly1.cif	{'ent_1': 1}	monomeric	1	?	author_defined_assembly
886	6D99	6d99-assembly1.cif	{'ent_1': 2}	dimeric	2	?	author_defined_assembly
887	7P45	7p45-assembly1.cif	{'ent_1': 1}	monomeric	1	PISA	author_and_software_defined_assembly
888	4CY9	4cy9-assembly1.cif	{'ent_1': 12}	dodecameric	12	PQS	software_defined_assembly
889	7P41	7p41-assembly1.cif	{'ent_1': 1}	monomeric	1	PISA	author_and_software_defined_assembly
890	7P43	7p43-assembly1.cif	{'ent_1': 1}	monomeric	1	PISA	author_and_software_defined_assembly
891	7P43	7p43-assembly2.cif	{'ent_1': 1}	monomeric	1	PISA	author_and_software_defined_assembly
892	7P42	7p42-assembly1.cif	{'ent_1': 2}	dimeric	2	PISA	author_and_software_defined_assembly
893	4DK1	4dk1-assembly1.cif	{'ent_1': 6}	hexameric	6	PISA	author_and_software_defined_assembly
894	4DK1	4dk1-assembly2.cif	{'ent_1': 6}	hexameric	6	PISA	author_and_software_defined_assembly
895	7P48	7p48-assembly1.cif	{'ent_49': 1, 'ent_9': 1, 'ent_8': 1, 'ent_3': 1, 'ent_2': 1, 'ent_1': 1, 'ent_7': 1, 'ent_6': 1, 'ent_5': 1, 'ent_4': 1, 'ent_31': 1, 'ent_30': 1, 'ent_19': 1, 'ent_32': 1, 'ent_35': 1, 'ent_34': 1, 'ent_37': 1, 'ent_36': 1, 'ent_13': 1, 'ent_12': 1, 'ent_11': 1, 'ent_10': 1, 'ent_17': 1, 'ent_16': 1, 'ent_15': 1, 'ent_14': 1, 'ent_33': 1, 'ent_51': 1, 'ent_18': 1, 'ent_53': 1, 'ent_52': 1, 'ent…	53-meric	53	?	author_defined_assembly
896	4CY6	4cy6-assembly1.cif	{'ent_1': 4}	tetrameric	4	PISA	author_and_software_defined_assembly
897	7P4D	7p4d-assembly1.cif	{'ent_1': 1}	monomeric	1	PISA	author_and_software_defined_assembly
898	4DKI	4dki-assembly1.cif	{'ent_1': 1}	monomeric	1	?	author_defined_assembly
899	4DKI	4dki-assembly2.cif	{'ent_1': 1}	monomeric	1	?	author_defined_assembly
900	4DKI	4dki-assembly3.cif	{'ent_1': 2}	dimeric	2	PISA	software_defined_assembly
901	7P4C	7p4c-assembly1.cif	{'ent_1': 1}	monomeric	1	PISA	author_and_software_defined_assembly
902	4DKJ	4dkj-assembly1.cif	{'ent_3': 1, 'ent_2': 1, 'ent_1': 1}	trimeric	3	PISA	author_and_software_defined_assembly
903	1SIW	1siw-assembly1.cif	{'ent_3': 1, 'ent_2': 1, 'ent_1': 1}	trimeric	3	PISA	author_and_software_defined_assembly
904	1SIW	1siw-assembly2.cif	{'ent_3': 2, 'ent_2': 2, 'ent_1': 2}	hexameric	6	PISA	software_defined_assembly
905	1SIW	1siw-assembly3.cif	{'ent_3': 2, 'ent_2': 2, 'ent_1': 2}	hexameric	6	PISA	software_defined_assembly
906	1SIW	1siw-assembly4.cif	{'ent_3': 2, 'ent_2': 2, 'ent_1': 2}	hexameric	6	PISA	software_defined_assembly
907	4CYA	4cya-assembly1.cif	{'ent_1': 12}	dodecameric	12	PISA	software_defined_assembly
908	7P4V	7p4v-assembly1.cif	{'ent_1': 3}	trimeric	3	PISA	author_and_software_defined_assembly
909	4DKY	4dky-assembly1.cif	{'ent_1': 2}	dimeric	2	PISA	author_and_software_defined_assembly
910	4DKY	4dky-assembly2.cif	{'ent_1': 2}	dimeric	2	PISA	author_and_software_defined_assembly
911	1SIJ	1sij-assembly1.cif	{'ent_1': 1}	monomeric	1	?	author_defined_assembly
912	1SII	1sii-assembly1.cif	{'ent_1': 2}	dimeric	2	PISA,PQS	author_and_software_defined_assembly
913	1SIH	1sih-assembly1.cif	{'ent_1': 2}	dimeric	2	PISA	author_and_software_defined_assembly
914	1SIG	1sig-assembly1.cif	{'ent_1': 1}	monomeric	1	?	author_defined_assembly
915	4CYR	4cyr-assembly1.cif	{'ent_1': 1}	monomeric	1	PISA	author_and_software_defined_assembly
916	4CYR	4cyr-assembly2.cif	{'ent_1': 1}	monomeric	1	PISA	author_and_software_defined_assembly
917	4CYS	4cys-assembly1.cif	{'ent_1': 1}	monomeric	1	PISA	author_and_software_defined_assembly
918	4CYS	4cys-assembly2.cif	{'ent_1': 1}	monomeric	1	PISA	author_and_software_defined_assembly
919	600000000000000	6e14-assembly1.cif	{'ent_3': 1, 'ent_2': 1, 'ent_1': 1, 'ent_5': 1, 'ent_4': 1}	pentameric	5	?	author_defined_assembly
920	6000000000000000	6e15-assembly1.cif	{'ent_3': 1, 'ent_2': 1, 'ent_1': 1, 'ent_5': 1, 'ent_4': 1}	pentameric	5	?	author_defined_assembly
921	2GAR	2gar-assembly1.cif	{'ent_1': 1}	monomeric	1	?	author_defined_assembly
922	2HCJ	2hcj-assembly1.cif	{'ent_2': 1, 'ent_1': 1}	dimeric	2	PISA	author_and_software_defined_assembly
923	2GAU	2gau-assembly1.cif	{'ent_1': 2}	dimeric	2	?	author_defined_assembly
924	1KVT	1kvt-assembly1.cif	{'ent_1': 2}	dimeric	2	PISA,PQS	author_and_software_defined_assembly
925	1KVU	1kvu-assembly1.cif	{'ent_1': 2}	dimeric	2	PISA,PQS	author_and_software_defined_assembly
926	1KVR	1kvr-assembly1.cif	{'ent_1': 2}	dimeric	2	PISA,PQS	author_and_software_defined_assembly
927	1KVS	1kvs-assembly1.cif	{'ent_1': 1}	monomeric	1	?	author_defined_assembly
928	1KVQ	1kvq-assembly1.cif	{'ent_1': 2}	dimeric	2	PISA,PQS	author_and_software_defined_assembly
929	1KVL	1kvl-assembly1.cif	{'ent_1': 1}	monomeric	1	?	author_defined_assembly
930	1KVL	1kvl-assembly2.cif	{'ent_1': 1}	monomeric	1	?	author_defined_assembly
931	1KVM	1kvm-assembly1.cif	{'ent_1': 1}	monomeric	1	?	author_defined_assembly
932	1KVM	1kvm-assembly2.cif	{'ent_1': 1}	monomeric	1	?	author_defined_assembly
933	4PE2	4pe2-assembly1.cif	{'ent_1': 1}	monomeric	1	PISA	author_and_software_defined_assembly
934	2GAE	2gae-assembly1.cif	{'ent_1': 1}	monomeric	1	?	author_defined_assembly
935	2GAJ	2gaj-assembly1.cif	{'ent_1': 1}	monomeric	1	?	author_defined_assembly
936	2GAJ	2gaj-assembly2.cif	{'ent_1': 1}	monomeric	1	?	author_defined_assembly
937	2GAH	2gah-assembly1.cif	{'ent_3': 1, 'ent_2': 1, 'ent_1': 1, 'ent_4': 1}	tetrameric	4	PISA	author_and_software_defined_assembly
938	2GAI	2gai-assembly1.cif	{'ent_1': 1}	monomeric	1	?	author_defined_assembly
939	2GAI	2gai-assembly2.cif	{'ent_1': 1}	monomeric	1	?	author_defined_assembly
940	1KVB	1kvb-assembly1.cif	{'ent_1': 1}	monomeric	1	?	author_defined_assembly
941	1KVC	1kvc-assembly1.cif	{'ent_1': 1}	monomeric	1	?	author_defined_assembly
942	1KVA	1kva-assembly1.cif	{'ent_1': 1}	monomeric	1	?	author_defined_assembly
943	5X0I	5x0i-assembly1.cif	{'ent_1': 4}	tetrameric	4	PISA	author_and_software_defined_assembly
944	5X0O	5x0o-assembly1.cif	{'ent_1': 2}	dimeric	2	PISA	author_and_software_defined_assembly
945	5X0O	5x0o-assembly2.cif	{'ent_1': 2}	dimeric	2	PISA	author_and_software_defined_assembly
946	5X0O	5x0o-assembly3.cif	{'ent_1': 2}	dimeric	2	PISA	author_and_software_defined_assembly
947	5X0N	5x0n-assembly1.cif	{'ent_1': 2}	dimeric	2	PISA	author_and_software_defined_assembly
948	5X0N	5x0n-assembly2.cif	{'ent_1': 2}	dimeric	2	PISA	author_and_software_defined_assembly
949	5X0N	5x0n-assembly3.cif	{'ent_1': 2}	dimeric	2	PISA	author_and_software_defined_assembly
950	1XVI	1xvi-assembly1.cif	{'ent_1': 2}	dimeric	2	?	author_defined_assembly
951	4EC5	4ec5-assembly1.cif	{'ent_1': 2}	dimeric	2	?	author_defined_assembly
952	4EC5	4ec5-assembly2.cif	{'ent_1': 1}	monomeric	1	PISA	software_defined_assembly
953	4EC5	4ec5-assembly3.cif	{'ent_1': 1}	monomeric	1	PISA	software_defined_assembly
954	3EOR	3eor-assembly1.cif	{'ent_1': 3}	trimeric	3	PISA	author_and_software_defined_assembly
955	1XVL	1xvl-assembly1.cif	{'ent_1': 1}	monomeric	1	?	author_defined_assembly
956	1XVL	1xvl-assembly2.cif	{'ent_1': 1}	monomeric	1	?	author_defined_assembly
957	1XVL	1xvl-assembly3.cif	{'ent_1': 1}	monomeric	1	?	author_defined_assembly
958	4EC2	4ec2-assembly1.cif	{'ent_1': 3}	trimeric	3	PISA	author_and_software_defined_assembly
959	1XVQ	1xvq-assembly1.cif	{'ent_1': 1}	monomeric	1	PISA	author_and_software_defined_assembly
960	1XVQ	1xvq-assembly2.cif	{'ent_1': 2}	dimeric	2	PISA	software_defined_assembly
961	5X0Z	5x0z-assembly1.cif	{'ent_2': 1, 'ent_1': 2}	trimeric	3	?	author_defined_assembly
962	5X0Z	5x0z-assembly2.cif	{'ent_2': 1, 'ent_1': 2}	trimeric	3	?	author_defined_assembly
963	1XVS	1xvs-assembly1.cif	{'ent_1': 2}	dimeric	2	PISA	author_and_software_defined_assembly
964	1XVU	1xvu-assembly1.cif	{'ent_1': 2}	dimeric	2	PISA,PQS	author_and_software_defined_assembly
965	1XVT	1xvt-assembly1.cif	{'ent_1': 2}	dimeric	2	PISA,PQS	author_and_software_defined_assembly
966	1XVW	1xvw-assembly1.cif	{'ent_1': 8}	octameric	8	?	author_defined_assembly
967	1XVV	1xvv-assembly1.cif	{'ent_1': 2}	dimeric	2	PISA,PQS	author_and_software_defined_assembly
968	5X0Q	5x0q-assembly1.cif	{'ent_1': 2}	dimeric	2	PISA	author_and_software_defined_assembly
969	5X0Q	5x0q-assembly2.cif	{'ent_1': 2}	dimeric	2	PISA	author_and_software_defined_assembly
970	5X0V	5x0v-assembly1.cif	{'ent_1': 2}	dimeric	2	PISA	author_and_software_defined_assembly
971	5X0V	5x0v-assembly2.cif	{'ent_1': 2}	dimeric	2	PISA	author_and_software_defined_assembly
972	3LS2	3ls2-assembly1.cif	{'ent_1': 2}	dimeric	2	?	author_defined_assembly
973	3LS2	3ls2-assembly2.cif	{'ent_1': 2}	dimeric	2	?	author_defined_assembly
974	1DFF	1dff-assembly1.cif	{'ent_1': 1}	monomeric	1	?	author_defined_assembly
975	4IPE	4ipe-assembly1.cif	{'ent_1': 2}	dimeric	2	PISA	author_and_software_defined_assembly
976	4ECL	4ecl-assembly1.cif	{'ent_1': 2}	dimeric	2	PISA	author_and_software_defined_assembly
977	4ECL	4ecl-assembly2.cif	{'ent_1': 2}	dimeric	2	PISA	author_and_software_defined_assembly
978	4ECM	4ecm-assembly1.cif	{'ent_1': 4}	tetrameric	4	?	author_defined_assembly
979	4ECI	4eci-assembly1.cif	{'ent_1': 2}	dimeric	2	PISA	author_and_software_defined_assembly
980	4ECJ	4ecj-assembly1.cif	{'ent_1': 2}	dimeric	2	PISA	author_and_software_defined_assembly
981	4ECD	4ecd-assembly1.cif	{'ent_1': 4}	tetrameric	4	PISA	author_and_software_defined_assembly
982	4ECF	4ecf-assembly1.cif	{'ent_1': 1}	monomeric	1	PISA	author_and_software_defined_assembly
983	5X00	5x00-assembly1.cif	{'ent_1': 4}	tetrameric	4	?	author_defined_assembly
984	5X00	5x00-assembly2.cif	{'ent_1': 2}	dimeric	2	PISA	author_and_software_defined_assembly
985	4ECA	4eca-assembly1.cif	{'ent_1': 4}	tetrameric	4	PISA	author_and_software_defined_assembly
986	2GA3	2ga3-assembly1.cif	{'ent_1': 2}	dimeric	2	PISA	author_and_software_defined_assembly
987	4PED	4ped-assembly1.cif	{'ent_1': 1}	monomeric	1	PISA	author_and_software_defined_assembly
988	1KV8	1kv8-assembly1.cif	{'ent_1': 2}	dimeric	2	PISA	author_and_software_defined_assembly
989	1KV8	1kv8-assembly2.cif	{'ent_1': 4}	tetrameric	4	PISA	software_defined_assembly
990	1KV9	1kv9-assembly1.cif	{'ent_1': 1}	monomeric	1	?	author_defined_assembly
991	1KV7	1kv7-assembly1.cif	{'ent_1': 1}	monomeric	1	?	author_defined_assembly
992	4PEK	4pek-assembly1.cif	{'ent_1': 1}	monomeric	1	PISA	author_and_software_defined_assembly
993	4PES	4pes-assembly1.cif	{'ent_2': 1, 'ent_1': 1}	dimeric	2	PISA	author_and_software_defined_assembly
994	4PES	4pes-assembly2.cif	{'ent_2': 1, 'ent_1': 1}	dimeric	2	PISA	author_and_software_defined_assembly
995	1RMY	1rmy-assembly1.cif	{'ent_1': 4}	tetrameric	4	PISA,PQS	author_and_software_defined_assembly
996	1YBD	1ybd-assembly1.cif	{'ent_1': 6}	hexameric	6	PQS	author_and_software_defined_assembly
997	1YBD	1ybd-assembly2.cif	{'ent_1': 4}	tetrameric	4	?	author_defined_assembly
998	1YBD	1ybd-assembly3.cif	{'ent_1': 2}	dimeric	2	PISA	software_defined_assembly
999	1YBD	1ybd-assembly4.cif	{'ent_1': 2}	dimeric	2	PISA	software_defined_assembly
1000	1YBD	1ybd-assembly5.cif	{'ent_1': 6}	hexameric	6	PQS	software_defined_assembly
1001	1RMT	1rmt-assembly1.cif	{'ent_1': 4}	tetrameric	4	?	author_defined_assembly
1002	1RMT	1rmt-assembly2.cif	{'ent_1': 4}	tetrameric	4	PISA	software_defined_assembly
1003	1RMT	1rmt-assembly3.cif	{'ent_1': 2}	dimeric	2	PQS	software_defined_assembly
1004	1RMT	1rmt-assembly4.cif	{'ent_1': 2}	dimeric	2	PQS	software_defined_assembly
1005	1RMQ	1rmq-assembly1.cif	{'ent_1': 4}	tetrameric	4	PISA,PQS	author_and_software_defined_assembly
1006	2NUU	2nuu-assembly1.cif	{'ent_2': 3, 'ent_1': 3}	hexameric	6	PISA	author_and_software_defined_assembly
1007	2NUU	2nuu-assembly2.cif	{'ent_2': 3, 'ent_1': 3}	hexameric	6	PISA	author_and_software_defined_assembly
1008	2NUU	2nuu-assembly3.cif	{'ent_2': 6, 'ent_1': 6}	dodecameric	12	PISA	software_defined_assembly
1009	2NUU	2nuu-assembly4.cif	{'ent_2': 6, 'ent_1': 6}	dodecameric	12	PISA	software_defined_assembly
1010	2NUU	2nuu-assembly5.cif	{'ent_2': 6, 'ent_1': 6}	dodecameric	12	PISA	software_defined_assembly
1011	2ICT	2ict-assembly1.cif	{'ent_1': 1}	monomeric	1	?	author_defined_assembly
1012	2ICT	2ict-assembly2.cif	{'ent_1': 2}	dimeric	2	PISA,PQS	software_defined_assembly
1013	2ICU	2icu-assembly1.cif	{'ent_1': 1}	monomeric	1	?	author_defined_assembly
1014	2ICU	2icu-assembly2.cif	{'ent_1': 1}	monomeric	1	?	author_defined_assembly
1015	2ICP	2icp-assembly1.cif	{'ent_1': 1}	monomeric	1	?	author_defined_assembly
1016	2ICP	2icp-assembly2.cif	{'ent_1': 2}	dimeric	2	PISA,PQS	software_defined_assembly
1017	1DFU	1dfu-assembly1.cif	{'ent_3': 1, 'ent_2': 1, 'ent_1': 1}	trimeric	3	?	author_defined_assembly
1018	2NUA	2nua-assembly1.cif	{'ent_2': 2, 'ent_1': 2}	tetrameric	4	?	author_defined_assembly
1019	2NUA	2nua-assembly2.cif	{'ent_2': 2, 'ent_1': 2}	tetrameric	4	?	author_defined_assembly
1020	2NUG	2nug-assembly1.cif	{'ent_3': 2, 'ent_2': 2, 'ent_1': 2}	hexameric	6	?	author_defined_assembly
1021	2ICK	2ick-assembly1.cif	{'ent_1': 1}	monomeric	1	?	author_defined_assembly
1022	2NUE	2nue-assembly1.cif	{'ent_2': 2, 'ent_1': 1}	trimeric	3	?	author_defined_assembly
1023	4O59	4o59-assembly1.cif	{'ent_1': 4}	tetrameric	4	PISA	author_and_software_defined_assembly
1024	2NUH	2nuh-assembly1.cif	{'ent_1': 1}	monomeric	1	?	author_defined_assembly
1025	2NUH	2nuh-assembly2.cif	{'ent_1': 3}	trimeric	3	PISA,PQS	software_defined_assembly
1026	2NUL	2nul-assembly1.cif	{'ent_1': 2}	dimeric	2	?	author_defined_assembly
1027	2DAA	2daa-assembly1.cif	{'ent_1': 2}	dimeric	2	PISA	author_and_software_defined_assembly
1028	3D7E	3d7e-assembly1.cif	{'ent_1': 2}	dimeric	2	PISA	author_and_software_defined_assembly
1029	2DAB	2dab-assembly1.cif	{'ent_1': 2}	dimeric	2	PISA	author_and_software_defined_assembly
1030	4R2F	4r2f-assembly1.cif	{'ent_1': 1}	monomeric	1	PISA	author_and_software_defined_assembly
1031	3D7N	3d7n-assembly1.cif	{'ent_1': 4}	tetrameric	4	PISA	author_and_software_defined_assembly
1032	5SY4	5sy4-assembly1.cif	{'ent_1': 2}	dimeric	2	PISA	author_and_software_defined_assembly
1033	7LH3	7lh3-assembly1.cif	{'ent_1': 2}	dimeric	2	?	author_defined_assembly
1034	3D7K	3d7k-assembly1.cif	{'ent_1': 4}	tetrameric	4	PISA	author_and_software_defined_assembly
1035	3D7S	3d7s-assembly1.cif	{'ent_2': 6, 'ent_1': 6}	dodecameric	12	PISA	author_and_software_defined_assembly
1036	6Z05	6z05-assembly1.cif	{'ent_1': 1}	dodecameric	12	?	author_defined_assembly
1037	6Z0J	6z0j-assembly1.cif	{'ent_1': 1}	monomeric	1	PISA	author_and_software_defined_assembly
1038	7LHZ	7lhz-assembly1.cif	{'ent_3': 2, 'ent_2': 2, 'ent_1': 2}	hexameric	6	PISA	software_defined_assembly
1039	7LHZ	7lhz-assembly2.cif	{'ent_3': 2, 'ent_2': 2, 'ent_1': 2}	hexameric	6	PISA	software_defined_assembly
1040	7LHU	7lhu-assembly1.cif	{'ent_1': 1}	monomeric	1	?	author_defined_assembly
1041	7LHU	7lhu-assembly2.cif	{'ent_1': 1}	monomeric	1	?	author_defined_assembly
1042	7LHV	7lhv-assembly1.cif	{'ent_1': 2}	dimeric	2	?	author_defined_assembly
1043	7LHP	7lhp-assembly1.cif	{'ent_1': 1}	monomeric	1	PISA	author_and_software_defined_assembly
1044	7LHP	7lhp-assembly2.cif	{'ent_1': 1}	monomeric	1	PISA	author_and_software_defined_assembly
1045	7LHS	7lhs-assembly1.cif	{'ent_1': 1}	monomeric	1	?	author_defined_assembly
1046	7LHS	7lhs-assembly2.cif	{'ent_1': 1}	monomeric	1	?	author_defined_assembly
1047	7LHR	7lhr-assembly1.cif	{'ent_1': 1}	monomeric	1	?	author_defined_assembly
1048	7LHR	7lhr-assembly2.cif	{'ent_1': 1}	monomeric	1	?	author_defined_assembly
1049	7LHL	7lhl-assembly1.cif	{'ent_1': 4}	tetrameric	4	?	author_defined_assembly
1050	6V6Y	6v6y-assembly1.cif	{'ent_1': 2}	dimeric	2	PISA	author_and_software_defined_assembly
1051	7LHI	7lhi-assembly1.cif	{'ent_3': 1, 'ent_2': 1, 'ent_1': 1, 'ent_5': 1, 'ent_4': 1}	pentameric	5	?	author_defined_assembly
1052	7LHH	7lhh-assembly1.cif	{'ent_3': 1, 'ent_2': 1, 'ent_1': 1, 'ent_4': 1}	tetrameric	4	?	author_defined_assembly
1053	7LHG	7lhg-assembly1.cif	{'ent_3': 1, 'ent_2': 1, 'ent_1': 1, 'ent_4': 1}	tetrameric	4	?	author_defined_assembly
1054	6Z0W	6z0w-assembly1.cif	{'ent_1': 1}	monomeric	1	?	author_defined_assembly
1055	6Z0W	6z0w-assembly2.cif	{'ent_1': 1}	monomeric	1	?	author_defined_assembly
1056	6Z0W	6z0w-assembly3.cif	{'ent_1': 1}	monomeric	1	?	author_defined_assembly
1057	6Z0W	6z0w-assembly4.cif	{'ent_1': 1}	monomeric	1	?	author_defined_assembly
1058	7LHA	7lha-assembly1.cif	{'ent_1': 1}	monomeric	1	?	author_defined_assembly
1059	7LHA	7lha-assembly2.cif	{'ent_1': 1}	monomeric	1	?	author_defined_assembly
1060	6Z0Q	6z0q-assembly1.cif	{'ent_1': 1}	monomeric	1	PISA	author_and_software_defined_assembly
1061	6Z0R	6z0r-assembly1.cif	{'ent_1': 1}	monomeric	1	PISA	author_and_software_defined_assembly
1062	4O5A	4o5a-assembly1.cif	{'ent_1': 2}	dimeric	2	PISA	author_and_software_defined_assembly
1063	2NU7	2nu7-assembly1.cif	{'ent_2': 2, 'ent_1': 2}	tetrameric	4	?	author_defined_assembly
1064	2NU7	2nu7-assembly2.cif	{'ent_2': 2, 'ent_1': 2}	tetrameric	4	?	author_defined_assembly
1065	2NU6	2nu6-assembly1.cif	{'ent_2': 2, 'ent_1': 2}	tetrameric	4	?	author_defined_assembly
1066	2NU6	2nu6-assembly2.cif	{'ent_2': 2, 'ent_1': 2}	tetrameric	4	?	author_defined_assembly
1067	2IC8	2ic8-assembly1.cif	{'ent_1': 1}	monomeric	1	?	author_defined_assembly
1068	4O5G	4o5g-assembly1.cif	{'ent_1': 2}	dimeric	2	PISA	software_defined_assembly
1069	4O5H	4o5h-assembly1.cif	{'ent_1': 2}	dimeric	2	PISA	software_defined_assembly
1070	4O5H	4o5h-assembly2.cif	{'ent_1': 2}	dimeric	2	PISA	software_defined_assembly
1071	4O5H	4o5h-assembly3.cif	{'ent_1': 4}	tetrameric	4	PISA	software_defined_assembly
1072	2IC7	2ic7-assembly1.cif	{'ent_1': 3}	trimeric	3	PISA	author_and_software_defined_assembly
1073	2NU9	2nu9-assembly1.cif	{'ent_2': 2, 'ent_1': 2}	tetrameric	4	PISA	author_and_software_defined_assembly
1074	2NU9	2nu9-assembly2.cif	{'ent_2': 2, 'ent_1': 2}	tetrameric	4	PISA	author_and_software_defined_assembly
1075	2NU8	2nu8-assembly1.cif	{'ent_2': 2, 'ent_1': 2}	tetrameric	4	?	author_defined_assembly
1076	2NU8	2nu8-assembly2.cif	{'ent_2': 2, 'ent_1': 2}	tetrameric	4	?	author_defined_assembly
1077	2WNN	2wnn-assembly1.cif	{'ent_1': 4}	tetrameric	4	PISA	author_and_software_defined_assembly
1078	2WNS	2wns-assembly1.cif	{'ent_1': 2}	dimeric	2	PISA	author_and_software_defined_assembly
1079	4O5Q	4o5q-assembly1.cif	{'ent_1': 2}	dimeric	2	PISA	author_and_software_defined_assembly
1080	2WNQ	2wnq-assembly1.cif	{'ent_1': 4}	tetrameric	4	PISA	author_and_software_defined_assembly
1081	4O5U	4o5u-assembly1.cif	{'ent_1': 2}	dimeric	2	PISA	author_and_software_defined_assembly
1082	2WNZ	2wnz-assembly1.cif	{'ent_1': 4}	tetrameric	4	PISA	author_and_software_defined_assembly
1083	4Q75	4q75-assembly1.cif	{'ent_1': 2}	dimeric	2	PISA	author_and_software_defined_assembly
1084	4Q76	4q76-assembly1.cif	{'ent_1': 2}	dimeric	2	PISA	author_and_software_defined_assembly
1085	4Q71	4q71-assembly1.cif	{'ent_1': 4}	tetrameric	4	PISA	author_and_software_defined_assembly
1086	4Q72	4q72-assembly1.cif	{'ent_1': 4}	tetrameric	4	PISA	author_and_software_defined_assembly
1087	4Q73	4q73-assembly1.cif	{'ent_1': 4}	tetrameric	4	PISA	author_and_software_defined_assembly
1088	8E2S	8e2s-assembly1.cif	{'ent_1': 2}	dimeric	2	PISA	author_and_software_defined_assembly
1089	8E2S	8e2s-assembly2.cif	{'ent_1': 2}	dimeric	2	PISA	author_and_software_defined_assembly
1090	8E2S	8e2s-assembly3.cif	{'ent_1': 2}	dimeric	2	PISA	author_and_software_defined_assembly
1091	8E2S	8e2s-assembly4.cif	{'ent_1': 2}	dimeric	2	PISA	author_and_software_defined_assembly
1092	8E2R	8e2r-assembly1.cif	{'ent_1': 2}	dimeric	2	PISA	author_and_software_defined_assembly
1093	8E2Q	8e2q-assembly1.cif	{'ent_2': 2, 'ent_1': 2}	tetrameric	4	PISA	author_and_software_defined_assembly
1094	8E2Q	8e2q-assembly2.cif	{'ent_2': 2, 'ent_1': 2}	tetrameric	4	PISA	author_and_software_defined_assembly
1095	8E2P	8e2p-assembly1.cif	{'ent_2': 2, 'ent_1': 2}	tetrameric	4	PISA	author_and_software_defined_assembly
1096	8E2P	8e2p-assembly2.cif	{'ent_2': 2, 'ent_1': 2}	tetrameric	4	PISA	author_and_software_defined_assembly
1097	4Q79	4q79-assembly1.cif	{'ent_1': 9}	nonameric	9	PISA	author_and_software_defined_assembly
1098	8E2O	8e2o-assembly1.cif	{'ent_1': 1}	monomeric	1	?	author_defined_assembly
1099	7OF4	7of4-assembly1.cif	{'ent_49': 1, 'ent_9': 1, 'ent_8': 1, 'ent_3': 1, 'ent_2': 1, 'ent_1': 1, 'ent_7': 1, 'ent_6': 1, 'ent_5': 1, 'ent_4': 1, 'ent_31': 1, 'ent_30': 1, 'ent_19': 1, 'ent_32': 1, 'ent_35': 1, 'ent_34': 1, 'ent_37': 1, 'ent_36': 1, 'ent_13': 1, 'ent_12': 1, 'ent_11': 1, 'ent_10': 1, 'ent_17': 1, 'ent_16': 1, 'ent_15': 1, 'ent_14': 1, 'ent_33': 1, 'ent_51': 1, 'ent_18': 1, 'ent_53': 1, 'ent_52': 1, 'ent…	53-meric	53	?	author_defined_assembly
1100	7OF5	7of5-assembly1.cif	{'ent_49': 1, 'ent_9': 1, 'ent_8': 1, 'ent_3': 1, 'ent_2': 1, 'ent_1': 1, 'ent_7': 1, 'ent_6': 1, 'ent_5': 1, 'ent_4': 1, 'ent_31': 1, 'ent_30': 1, 'ent_19': 1, 'ent_32': 1, 'ent_35': 1, 'ent_34': 1, 'ent_37': 1, 'ent_36': 1, 'ent_13': 1, 'ent_12': 1, 'ent_11': 1, 'ent_10': 1, 'ent_17': 1, 'ent_16': 1, 'ent_15': 1, 'ent_14': 1, 'ent_57': 1, 'ent_56': 1, 'ent_33': 1, 'ent_51': 1, 'ent_18': 1, 'ent…	57-meric	57	?	author_defined_assembly
1101	7OF6	7of6-assembly1.cif	{'ent_49': 1, 'ent_9': 1, 'ent_8': 1, 'ent_3': 1, 'ent_2': 1, 'ent_1': 1, 'ent_7': 1, 'ent_6': 1, 'ent_5': 1, 'ent_4': 1, 'ent_31': 1, 'ent_30': 1, 'ent_19': 1, 'ent_32': 1, 'ent_35': 1, 'ent_34': 1, 'ent_37': 1, 'ent_36': 1, 'ent_13': 1, 'ent_12': 1, 'ent_11': 1, 'ent_10': 1, 'ent_17': 1, 'ent_16': 1, 'ent_15': 1, 'ent_14': 1, 'ent_33': 1, 'ent_51': 1, 'ent_18': 1, 'ent_53': 1, 'ent_52': 1, 'ent…	53-meric	53	PISA	author_and_software_defined_assembly
1102	7OF7	7of7-assembly1.cif	{'ent_49': 1, 'ent_9': 1, 'ent_8': 1, 'ent_3': 1, 'ent_2': 1, 'ent_1': 1, 'ent_7': 1, 'ent_6': 1, 'ent_5': 1, 'ent_4': 1, 'ent_31': 1, 'ent_30': 1, 'ent_19': 1, 'ent_32': 1, 'ent_35': 1, 'ent_34': 1, 'ent_37': 1, 'ent_36': 1, 'ent_13': 1, 'ent_12': 1, 'ent_11': 1, 'ent_10': 1, 'ent_17': 1, 'ent_16': 1, 'ent_15': 1, 'ent_14': 1, 'ent_57': 1, 'ent_56': 1, 'ent_33': 1, 'ent_51': 1, 'ent_18': 1, 'ent…	57-meric	57	?	author_defined_assembly
1103	7OF0	7of0-assembly1.cif	{'ent_49': 1, 'ent_9': 1, 'ent_8': 1, 'ent_3': 1, 'ent_2': 1, 'ent_1': 1, 'ent_7': 1, 'ent_6': 1, 'ent_5': 1, 'ent_4': 1, 'ent_31': 1, 'ent_30': 1, 'ent_19': 1, 'ent_32': 1, 'ent_35': 1, 'ent_34': 1, 'ent_37': 1, 'ent_36': 1, 'ent_13': 1, 'ent_12': 1, 'ent_11': 1, 'ent_10': 1, 'ent_17': 1, 'ent_16': 1, 'ent_15': 1, 'ent_14': 1, 'ent_56': 1, 'ent_33': 1, 'ent_51': 1, 'ent_18': 1, 'ent_55': 1, 'ent…	56-meric	56	?	author_defined_assembly
1104	7OF2	7of2-assembly1.cif	{'ent_49': 1, 'ent_9': 1, 'ent_8': 1, 'ent_3': 1, 'ent_2': 1, 'ent_1': 1, 'ent_7': 1, 'ent_6': 1, 'ent_5': 1, 'ent_4': 1, 'ent_31': 1, 'ent_30': 1, 'ent_19': 1, 'ent_32': 1, 'ent_35': 1, 'ent_34': 1, 'ent_37': 1, 'ent_36': 1, 'ent_13': 1, 'ent_12': 1, 'ent_11': 1, 'ent_10': 1, 'ent_17': 1, 'ent_16': 1, 'ent_15': 1, 'ent_14': 1, 'ent_56': 1, 'ent_33': 1, 'ent_51': 1, 'ent_18': 1, 'ent_55': 1, 'ent…	56-meric	56	?	author_defined_assembly
1105	7OF3	7of3-assembly1.cif	{'ent_49': 1, 'ent_9': 1, 'ent_8': 1, 'ent_3': 1, 'ent_2': 1, 'ent_1': 1, 'ent_7': 1, 'ent_6': 1, 'ent_5': 1, 'ent_4': 1, 'ent_31': 1, 'ent_30': 1, 'ent_19': 1, 'ent_32': 1, 'ent_35': 1, 'ent_34': 1, 'ent_37': 1, 'ent_36': 1, 'ent_13': 1, 'ent_12': 1, 'ent_11': 1, 'ent_10': 1, 'ent_17': 1, 'ent_16': 1, 'ent_15': 1, 'ent_14': 1, 'ent_56': 1, 'ent_33': 1, 'ent_51': 1, 'ent_18': 1, 'ent_55': 1, 'ent…	56-meric	56	?	author_defined_assembly
1106	5WLY	5wly-assembly1.cif	{'ent_1': 1}	monomeric	1	?	author_defined_assembly
1107	5WLY	5wly-assembly2.cif	{'ent_1': 2}	dimeric	2	PISA	software_defined_assembly
1108	5WLW	5wlw-assembly1.cif	{'ent_3': 2, 'ent_2': 2, 'ent_1': 2, 'ent_4': 2}	octameric	8	PISA	author_and_software_defined_assembly
1109	4K7Q	4k7q-assembly1.cif	{'ent_1': 3}	trimeric	3	PISA	author_and_software_defined_assembly
1110	5WLN	5wln-assembly1.cif	{'ent_1': 1}	pentadecameric	15	?	author_defined_assembly
1111	5WLC	5wlc-assembly1.cif	{'ent_49': 1, 'ent_65': 1, 'ent_9': 1, 'ent_8': 1, 'ent_59': 1, 'ent_3': 1, 'ent_2': 1, 'ent_1': 1, 'ent_58': 1, 'ent_7': 1, 'ent_6': 1, 'ent_5': 1, 'ent_4': 1, 'ent_31': 1, 'ent_30': 1, 'ent_19': 1, 'ent_32': 2, 'ent_35': 1, 'ent_34': 1, 'ent_37': 1, 'ent_36': 1, 'ent_13': 1, 'ent_12': 1, 'ent_11': 1, 'ent_10': 1, 'ent_17': 1, 'ent_16': 1, 'ent_15': 1, 'ent_14': 1, 'ent_57': 1, 'ent_61': 1, 'ent…	70-meric	70	?	author_defined_assembly
1112	3ICE	3ice-assembly1.cif	{'ent_2': 1, 'ent_1': 6}	heptameric	7	?	author_defined_assembly
1113	1UOK	1uok-assembly1.cif	{'ent_1': 1}	monomeric	1	?	author_defined_assembly
1114	5NPB	5npb-assembly1.cif	{'ent_1': 1}	monomeric	1	PISA	author_and_software_defined_assembly
1115	7UNV	7unv-assembly1.cif	{'ent_49': 1, 'ent_9': 1, 'ent_8': 1, 'ent_3': 1, 'ent_2': 1, 'ent_1': 1, 'ent_7': 1, 'ent_6': 1, 'ent_5': 1, 'ent_4': 1, 'ent_31': 1, 'ent_30': 1, 'ent_19': 1, 'ent_32': 1, 'ent_35': 1, 'ent_34': 1, 'ent_37': 1, 'ent_36': 1, 'ent_13': 1, 'ent_12': 1, 'ent_11': 1, 'ent_10': 1, 'ent_17': 1, 'ent_16': 1, 'ent_15': 1, 'ent_14': 1, 'ent_57': 1, 'ent_56': 1, 'ent_33': 1, 'ent_51': 1, 'ent_18': 1, 'ent…	57-meric	57	?	author_defined_assembly
1116	7UNW	7unw-assembly1.cif	{'ent_49': 1, 'ent_9': 1, 'ent_8': 1, 'ent_3': 1, 'ent_2': 1, 'ent_1': 1, 'ent_7': 1, 'ent_6': 1, 'ent_5': 1, 'ent_4': 1, 'ent_31': 1, 'ent_30': 1, 'ent_19': 1, 'ent_32': 1, 'ent_35': 1, 'ent_34': 1, 'ent_37': 1, 'ent_36': 1, 'ent_13': 1, 'ent_12': 1, 'ent_11': 1, 'ent_10': 1, 'ent_17': 1, 'ent_16': 1, 'ent_15': 1, 'ent_14': 1, 'ent_57': 1, 'ent_56': 1, 'ent_33': 1, 'ent_51': 1, 'ent_18': 1, 'ent…	57-meric	57	?	author_defined_assembly
1117	7UNT	7unt-assembly1.cif	{'ent_1': 1}	monomeric	1	?	author_defined_assembly
1118	7UNU	7unu-assembly1.cif	{'ent_49': 1, 'ent_9': 1, 'ent_8': 1, 'ent_3': 1, 'ent_2': 1, 'ent_1': 1, 'ent_7': 1, 'ent_6': 1, 'ent_5': 1, 'ent_4': 1, 'ent_31': 1, 'ent_30': 1, 'ent_19': 1, 'ent_32': 1, 'ent_35': 1, 'ent_34': 1, 'ent_37': 1, 'ent_36': 1, 'ent_13': 1, 'ent_12': 1, 'ent_11': 1, 'ent_10': 1, 'ent_17': 1, 'ent_16': 1, 'ent_15': 1, 'ent_14': 1, 'ent_57': 1, 'ent_56': 1, 'ent_33': 1, 'ent_51': 1, 'ent_18': 1, 'ent…	57-meric	57	?	author_defined_assembly
1119	7UNR	7unr-assembly1.cif	{'ent_49': 1, 'ent_9': 1, 'ent_8': 1, 'ent_3': 1, 'ent_2': 1, 'ent_1': 1, 'ent_7': 1, 'ent_6': 1, 'ent_5': 1, 'ent_4': 1, 'ent_31': 1, 'ent_30': 1, 'ent_19': 1, 'ent_32': 1, 'ent_35': 1, 'ent_34': 1, 'ent_37': 1, 'ent_36': 1, 'ent_13': 1, 'ent_12': 1, 'ent_11': 1, 'ent_10': 1, 'ent_17': 1, 'ent_16': 1, 'ent_15': 1, 'ent_14': 1, 'ent_57': 1, 'ent_56': 1, 'ent_33': 1, 'ent_51': 1, 'ent_18': 1, 'ent…	57-meric	57	?	author_defined_assembly
1120	7UNQ	7unq-assembly1.cif	{'ent_1': 1}	monomeric	1	?	author_defined_assembly
1121	7UND	7und-assembly1.cif	{'ent_29': 2, 'ent_20': 1, 'ent_9': 1, 'ent_21': 1, 'ent_3': 1, 'ent_2': 1, 'ent_1': 1, 'ent_7': 1, 'ent_6': 1, 'ent_5': 1, 'ent_4': 1, 'ent_22': 1, 'ent_23': 1, 'ent_19': 1, 'ent_18': 1, 'ent_26': 2, 'ent_27': 2, 'ent_24': 1, 'ent_25': 1, 'ent_13': 1, 'ent_12': 1, 'ent_11': 1, 'ent_10': 1, 'ent_17': 1, 'ent_16': 1, 'ent_15': 1, 'ent_14': 1, 'ent_8': 1, 'ent_28': 2}	33-meric	33	?	author_defined_assembly
1122	7UNC	7unc-assembly1.cif	{'ent_20': 1, 'ent_9': 1, 'ent_21': 1, 'ent_3': 1, 'ent_2': 1, 'ent_1': 1, 'ent_7': 1, 'ent_6': 1, 'ent_5': 1, 'ent_4': 1, 'ent_22': 1, 'ent_23': 1, 'ent_19': 1, 'ent_18': 1, 'ent_26': 2, 'ent_27': 2, 'ent_24': 1, 'ent_25': 2, 'ent_13': 1, 'ent_12': 1, 'ent_11': 1, 'ent_10': 1, 'ent_17': 1, 'ent_16': 1, 'ent_15': 1, 'ent_14': 1, 'ent_8': 1, 'ent_28': 2}	32-meric	32	?	author_defined_assembly
1123	5G1M	5g1m-assembly1.cif	{'ent_1': 1}	monomeric	1	PISA	author_and_software_defined_assembly
1124	5G1M	5g1m-assembly2.cif	{'ent_1': 1}	monomeric	1	PISA	author_and_software_defined_assembly
1125	5G1L	5g1l-assembly1.cif	{'ent_1': 4}	tetrameric	4	PISA	software_defined_assembly
1126	5G1K	5g1k-assembly1.cif	{'ent_1': 2}	dimeric	2	PISA	author_and_software_defined_assembly
1127	4Q7F	4q7f-assembly1.cif	{'ent_1': 1}	monomeric	1	PISA	author_and_software_defined_assembly
1128	7OFX	7ofx-assembly1.cif	{'ent_1': 2}	dimeric	2	?	author_defined_assembly
1129	7OFX	7ofx-assembly2.cif	{'ent_1': 2}	dimeric	2	?	author_defined_assembly
1130	4Q7A	4q7a-assembly1.cif	{'ent_1': 8}	octameric	8	PISA	author_and_software_defined_assembly
1131	7OFZ	7ofz-assembly1.cif	{'ent_2': 2, 'ent_1': 1}	trimeric	3	?	author_defined_assembly
1132	7OFZ	7ofz-assembly2.cif	{'ent_2': 1, 'ent_1': 1}	dimeric	2	PISA	author_and_software_defined_assembly
1133	7OFW	7ofw-assembly1.cif	{'ent_2': 2, 'ent_1': 1}	trimeric	3	?	author_defined_assembly
1134	5G1S	5g1s-assembly1.cif	{'ent_1': 14}	tetradecameric	14	PISA	author_and_software_defined_assembly
1135	5G1S	5g1s-assembly2.cif	{'ent_1': 14}	tetradecameric	14	PISA	author_and_software_defined_assembly
1136	4Q7I	4q7i-assembly1.cif	{'ent_1': 2}	dimeric	2	PISA	author_and_software_defined_assembly
1137	4Q7I	4q7i-assembly2.cif	{'ent_1': 4}	tetrameric	4	PISA	software_defined_assembly
1138	4Q7J	4q7j-assembly1.cif	{'ent_3': 1, 'ent_2': 1, 'ent_1': 1, 'ent_4': 1}	tetrameric	4	PISA	author_and_software_defined_assembly
1139	4Q7J	4q7j-assembly2.cif	{'ent_3': 1, 'ent_2': 1, 'ent_1': 1, 'ent_4': 1}	tetrameric	4	PISA	author_and_software_defined_assembly
1140	7AP1	7ap1-assembly1.cif	{'ent_1': 2}	dimeric	2	PISA	author_and_software_defined_assembly
1141	7AP2	7ap2-assembly1.cif	{'ent_1': 1}	monomeric	1	?	author_defined_assembly
1142	7AP3	7ap3-assembly1.cif	{'ent_1': 2}	dimeric	2	PISA	author_and_software_defined_assembly
1143	7AP4	7ap4-assembly1.cif	{'ent_1': 2}	dimer	2	PISA	author_and_software_defined_assembly
1144	1Z39	1z39-assembly1.cif	{'ent_1': 6}	hexameric	6	PISA,PQS	author_and_software_defined_assembly
1145	3MZ0	3mz0-assembly1.cif	{'ent_1': 4}	tetrameric	4	PISA	author_and_software_defined_assembly
1146	3MZ1	3mz1-assembly1.cif	{'ent_1': 2}	dimeric	2	PISA	author_and_software_defined_assembly
1147	3MZ1	3mz1-assembly2.cif	{'ent_1': 2}	dimeric	2	PISA	author_and_software_defined_assembly
1148	1Z34	1z34-assembly1.cif	{'ent_1': 6}	hexameric	6	PISA,PQS	author_and_software_defined_assembly
1149	1Z35	1z35-assembly1.cif	{'ent_1': 6}	hexameric	6	PISA,PQS	author_and_software_defined_assembly
1150	1Z36	1z36-assembly1.cif	{'ent_1': 6}	hexameric	6	PISA,PQS	author_and_software_defined_assembly
1151	1Z37	1z37-assembly1.cif	{'ent_1': 6}	hexameric	6	PISA,PQS	author_and_software_defined_assembly
1152	3O6Z	3o6z-assembly1.cif	{'ent_1': 2}	dimeric	2	PISA	author_and_software_defined_assembly
1153	3MZ9	3mz9-assembly1.cif	{'ent_1': 1}	monomeric	1	PISA	author_and_software_defined_assembly
1154	3MZ9	3mz9-assembly2.cif	{'ent_1': 1}	monomeric	1	PISA	author_and_software_defined_assembly
1155	2P1X	2p1x-assembly1.cif	{'ent_1': 1}	monomeric	1	?	author_defined_assembly
1156	1U8X	1u8x-assembly1.cif	{'ent_1': 1}	monomeric	1	?	author_defined_assembly
1157	1U8S	1u8s-assembly1.cif	{'ent_1': 2}	dimeric	2	PISA	author_and_software_defined_assembly
1158	1U8T	1u8t-assembly1.cif	{'ent_2': 1, 'ent_1': 1}	dimeric	2	PISA	author_and_software_defined_assembly
1159	1U8T	1u8t-assembly2.cif	{'ent_2': 1, 'ent_1': 1}	dimeric	2	PISA	author_and_software_defined_assembly
1160	1U8T	1u8t-assembly3.cif	{'ent_2': 3, 'ent_1': 1}	monomeric	1	PISA	author_and_software_defined_assembly
1161	1U8T	1u8t-assembly4.cif	{'ent_2': 1, 'ent_1': 1}	monomeric	1	PISA	author_and_software_defined_assembly
1162	1U8T	1u8t-assembly5.cif	{'ent_2': 4, 'ent_1': 2}	dimeric	2	PISA	software_defined_assembly
1163	1U8U	1u8u-assembly1.cif	{'ent_1': 1}	monomeric	1	?	author_defined_assembly
1164	1U8U	1u8u-assembly2.cif	{'ent_1': 2}	dimeric	2	PISA	software_defined_assembly
1165	2MFG	2mfg-assembly1.cif	{'ent_2': 2, 'ent_1': 2}	tetrameric	4	?	author_defined_assembly
1166	1U8B	1u8b-assembly1.cif	{'ent_3': 1, 'ent_2': 1, 'ent_1': 1, 'ent_5': 1, 'ent_4': 1}	pentameric	5	?	author_defined_assembly
1167	1U8A	1u8a-assembly1.cif	{'ent_1': 1}	monomeric	1	?	author_defined_assembly
1168	1U8F	1u8f-assembly1.cif	{'ent_1': 4}	tetrameric	4	PISA	author_and_software_defined_assembly
1169	1U80	1u80-assembly1.cif	{'ent_1': 2}	dimeric	2	PISA	author_and_software_defined_assembly
1170	1U80	1u80-assembly2.cif	{'ent_1': 2}	dimeric	2	?	author_defined_assembly
1171	1LLU	1llu-assembly1.cif	{'ent_1': 4}	tetrameric	4	PISA	author_and_software_defined_assembly
1172	1LLU	1llu-assembly2.cif	{'ent_1': 4}	tetrameric	4	PISA	author_and_software_defined_assembly
1173	2MFF	2mff-assembly1.cif	{'ent_2': 2, 'ent_1': 2}	tetrameric	4	?	author_defined_assembly
1174	7UAT	7uat-assembly1.cif	{'ent_1': 1}	monomeric	1	PISA	author_and_software_defined_assembly
1175	5MKS	5mks-assembly1.cif	{'ent_1': 1}	monomeric	1	PISA	author_and_software_defined_assembly
1176	5MKR	5mkr-assembly1.cif	{'ent_1': 1}	monomeric	1	PISA	author_and_software_defined_assembly
1177	5MKQ	5mkq-assembly1.cif	{'ent_1': 2}	dimeric	2	PISA	author_and_software_defined_assembly
1178	5MKP	5mkp-assembly1.cif	{'ent_1': 1}	monomeric	1	PISA	author_and_software_defined_assembly
1179	7APU	7apu-assembly1.cif	{'ent_1': 1}	monomeric	1	?	author_defined_assembly
1180	7APU	7apu-assembly2.cif	{'ent_1': 1}	monomeric	1	?	author_defined_assembly
1181	3MZF	3mzf-assembly1.cif	{'ent_1': 1}	monomeric	1	PISA	author_and_software_defined_assembly
1182	3MZD	3mzd-assembly1.cif	{'ent_1': 1}	monomeric	1	PISA	author_and_software_defined_assembly
1183	3MZE	3mze-assembly1.cif	{'ent_1': 1}	monomeric	1	PISA	author_and_software_defined_assembly
1184	5MKG	5mkg-assembly1.cif	{'ent_2': 3, 'ent_1': 1}	monomeric	1	PISA	author_and_software_defined_assembly
1185	5MKG	5mkg-assembly2.cif	{'ent_2': 4, 'ent_1': 1}	monomeric	1	PISA	author_and_software_defined_assembly
1186	5MKK	5mkk-assembly1.cif	{'ent_2': 1, 'ent_1': 1}	dimeric	2	PISA	software_defined_assembly
1187	1Z3E	1z3e-assembly1.cif	{'ent_2': 1, 'ent_1': 1}	dimeric	2	?	author_defined_assembly
1188	5MKO	5mko-assembly1.cif	{'ent_1': 2}	dimeric	2	PISA	author_and_software_defined_assembly
1189	1Z3A	1z3a-assembly1.cif	{'ent_1': 2}	dimeric	2	PISA	author_and_software_defined_assembly
1190	3MZH	3mzh-assembly1.cif	{'ent_3': 1, 'ent_2': 1, 'ent_1': 2}	tetrameric	4	?	author_defined_assembly
1191	7C8O	7c8o-assembly1.cif	{'ent_1': 2}	dimeric	2	?	author_defined_assembly
1192	7C8O	7c8o-assembly2.cif	{'ent_1': 2}	dimeric	2	?	author_defined_assembly
1193	4G74	4g74-assembly1.cif	{'ent_1': 2}	dimeric	2	PISA	author_and_software_defined_assembly
1194	4G73	4g73-assembly1.cif	{'ent_1': 2}	dimeric	2	PISA	author_and_software_defined_assembly
1195	3LTI	3lti-assembly1.cif	{'ent_1': 1}	monomeric	1	PISA	author_and_software_defined_assembly
1196	3LTH	3lth-assembly1.cif	{'ent_1': 1}	monomeric	1	PISA	author_and_software_defined_assembly
1197	1LLZ	1llz-assembly1.cif	{'ent_1': 1}	monomeric	1	?	author_defined_assembly
1198	3LTW	3ltw-assembly1.cif	{'ent_1': 1}	monomeric	1	?	author_defined_assembly
1199	3LTW	3ltw-assembly2.cif	{'ent_1': 2}	dimeric	2	PISA	software_defined_assembly
1200	3LTP	3ltp-assembly1.cif	{'ent_1': 2}	dimeric	2	PISA	author_and_software_defined_assembly
1201	6DV2	6dv2-assembly1.cif	{'ent_2': 2, 'ent_1': 2}	tetrameric	4	PISA	author_and_software_defined_assembly
1202	6DV2	6dv2-assembly2.cif	{'ent_2': 2, 'ent_1': 2}	tetrameric	4	PISA	author_and_software_defined_assembly
1203	6DV2	6dv2-assembly3.cif	{'ent_2': 2, 'ent_1': 2}	tetrameric	4	PISA	author_and_software_defined_assembly
1204	6DV3	6dv3-assembly1.cif	{'ent_1': 1}	pentadecameric	15	?	author_defined_assembly
1205	6DV6	6dv6-assembly1.cif	{'ent_1': 1}	pentadecameric	15	?	author_defined_assembly
1206	1I2P	1i2p-assembly1.cif	{'ent_1': 2}	dimeric	2	?	author_defined_assembly
1207	1I2Q	1i2q-assembly1.cif	{'ent_1': 2}	dimeric	2	?	author_defined_assembly
1208	1I2R	1i2r-assembly1.cif	{'ent_1': 2}	dimeric	2	?	author_defined_assembly
1209	5NP6	5np6-assembly1.cif	{'ent_49': 1, 'ent_9': 1, 'ent_8': 1, 'ent_3': 1, 'ent_2': 1, 'ent_1': 1, 'ent_7': 1, 'ent_6': 1, 'ent_5': 1, 'ent_4': 1, 'ent_31': 1, 'ent_30': 1, 'ent_19': 1, 'ent_32': 1, 'ent_35': 1, 'ent_34': 1, 'ent_37': 1, 'ent_36': 1, 'ent_13': 1, 'ent_12': 1, 'ent_11': 1, 'ent_10': 1, 'ent_17': 1, 'ent_16': 1, 'ent_15': 1, 'ent_14': 1, 'ent_57': 1, 'ent_56': 1, 'ent_33': 1, 'ent_51': 1, 'ent_18': 1, 'ent…	57-meric	57	PISA	author_and_software_defined_assembly
1210	1I2Z	1i2z-assembly1.cif	{'ent_1': 4}	tetrameric	4	PISA,PQS	author_and_software_defined_assembly
1211	1I2D	1i2d-assembly1.cif	{'ent_1': 6}	hexameric	6	?	author_defined_assembly
1212	1I2K	1i2k-assembly1.cif	{'ent_1': 2}	dimeric	2	PISA,PQS	author_and_software_defined_assembly
1213	1I2L	1i2l-assembly1.cif	{'ent_1': 2}	dimeric	2	PISA,PQS	author_and_software_defined_assembly
1214	5IB9	5ib9-assembly1.cif	{'ent_1': 2}	dimeric	2	PISA	author_and_software_defined_assembly
1215	1I2N	1i2n-assembly1.cif	{'ent_1': 2}	dimeric	2	?	author_defined_assembly
1216	1I2O	1i2o-assembly1.cif	{'ent_1': 2}	dimeric	2	?	author_defined_assembly
1217	5VBI	5vbi-assembly1.cif	{'ent_1': 1}	monomeric	1	?	author_defined_assembly
1218	5VBI	5vbi-assembly2.cif	{'ent_1': 1}	monomeric	1	?	author_defined_assembly
1219	5VBG	5vbg-assembly1.cif	{'ent_1': 1}	monomeric	1	PISA	author_and_software_defined_assembly
1220	1I29	1i29-assembly1.cif	{'ent_1': 2}	dimeric	2	PISA,PQS	author_and_software_defined_assembly
1221	5VBB	5vbb-assembly1.cif	{'ent_1': 1}	monomeric	1	PISA	author_and_software_defined_assembly
1222	5IBQ	5ibq-assembly1.cif	{'ent_1': 1}	monomeric	1	PISA	author_and_software_defined_assembly
1223	5VBX	5vbx-assembly1.cif	{'ent_1': 3}	trimeric	3	PISA	author_and_software_defined_assembly
1224	5IBX	5ibx-assembly1.cif	{'ent_2': 1, 'ent_1': 1}	dimeric	2	PISA	author_and_software_defined_assembly
1225	5IBX	5ibx-assembly2.cif	{'ent_2': 3, 'ent_1': 2}	dimeric	2	PISA	author_and_software_defined_assembly
1226	5IBX	5ibx-assembly3.cif	{'ent_2': 1, 'ent_1': 1}	dimeric	2	PISA	author_and_software_defined_assembly
1227	5IBX	5ibx-assembly4.cif	{'ent_2': 1, 'ent_1': 1}	dimeric	2	PISA	author_and_software_defined_assembly
1228	5IBY	5iby-assembly1.cif	{'ent_1': 1}	monomeric	1	PISA	author_and_software_defined_assembly
1229	7FCA	7fca-assembly1.cif	{'ent_2': 1, 'ent_1': 5}	hexameric	6	?	author_defined_assembly
1230	4G7Z	4g7z-assembly1.cif	{'ent_3': 1, 'ent_2': 1, 'ent_1': 2, 'ent_7': 1, 'ent_6': 1, 'ent_5': 1, 'ent_4': 1}	octameric	8	PISA	author_and_software_defined_assembly
1231	4G7Z	4g7z-assembly2.cif	{'ent_3': 1, 'ent_2': 1, 'ent_1': 2, 'ent_7': 1, 'ent_6': 1, 'ent_5': 1, 'ent_4': 1}	octameric	8	PISA	author_and_software_defined_assembly
1232	6QRJ	6qrj-assembly1.cif	{'ent_1': 2}	dimeric	2	PISA	author_and_software_defined_assembly
1233	6DVX	6dvx-assembly1.cif	{'ent_1': 4}	tetrameric	4	PISA	author_and_software_defined_assembly
1234	4G7O	4g7o-assembly1.cif	{'ent_8': 1, 'ent_3': 1, 'ent_2': 1, 'ent_1': 2, 'ent_7': 1, 'ent_6': 1, 'ent_5': 1, 'ent_4': 1}	nonameric	9	PISA	author_and_software_defined_assembly
1235	4G7O	4g7o-assembly2.cif	{'ent_8': 1, 'ent_3': 1, 'ent_2': 1, 'ent_1': 2, 'ent_7': 1, 'ent_6': 1, 'ent_5': 1, 'ent_4': 1}	nonameric	9	PISA	author_and_software_defined_assembly
1236	6DVS	6dvs-assembly1.cif	{'ent_1': 2}	dimeric	2	PISA	author_and_software_defined_assembly
1237	6DVV	6dvv-assembly1.cif	{'ent_1': 1}	monomeric	1	PISA	author_and_software_defined_assembly
1238	6DVV	6dvv-assembly2.cif	{'ent_1': 1}	monomeric	1	PISA	author_and_software_defined_assembly
1239	1YIA	1yia-assembly1.cif	{'ent_1': 2}	dimeric	2	PISA	author_and_software_defined_assembly
1240	1YIA	1yia-assembly2.cif	{'ent_1': 2}	dimeric	2	?	author_defined_assembly
1241	5MFT	5mft-assembly1.cif	{'ent_1': 1}	monomeric	1	PISA	author_and_software_defined_assembly
1242	4IU8	4iu8-assembly1.cif	{'ent_1': 1}	monomeric	1	PISA	author_and_software_defined_assembly
1243	4IU8	4iu8-assembly2.cif	{'ent_1': 1}	monomeric	1	PISA	author_and_software_defined_assembly
1244	4IU9	4iu9-assembly1.cif	{'ent_1': 1}	monomeric	1	PISA	author_and_software_defined_assembly
1245	4IU9	4iu9-assembly2.cif	{'ent_1': 1}	monomeric	1	PISA	author_and_software_defined_assembly
1246	3VBM	3vbm-assembly1.cif	{'ent_1': 3}	trimeric	3	PISA	author_and_software_defined_assembly
1247	1YID	1yid-assembly1.cif	{'ent_1': 2}	dimeric	2	PISA	author_and_software_defined_assembly
1248	1YID	1yid-assembly2.cif	{'ent_1': 2}	dimeric	2	?	author_defined_assembly
1249	3VBN	3vbn-assembly1.cif	{'ent_1': 3}	trimeric	3	PISA	author_and_software_defined_assembly
1250	3VBA	3vba-assembly1.cif	{'ent_1': 2}	dimeric	2	PISA	author_and_software_defined_assembly
1251	3VBA	3vba-assembly2.cif	{'ent_1': 2}	dimeric	2	PISA	author_and_software_defined_assembly
1252	3VBA	3vba-assembly3.cif	{'ent_1': 2}	dimeric	2	PISA	author_and_software_defined_assembly
1253	2R97	2r97-assembly1.cif	{'ent_1': 4}	tetrameric	4	PISA	author_and_software_defined_assembly
1254	3VBB	3vbb-assembly1.cif	{'ent_1': 2}	dimeric	2	PISA	author_and_software_defined_assembly
1255	3VBB	3vbb-assembly2.cif	{'ent_1': 2}	dimeric	2	PISA	author_and_software_defined_assembly
1256	3VBB	3vbb-assembly3.cif	{'ent_1': 2}	dimeric	2	PISA	author_and_software_defined_assembly
1257	3VBE	3vbe-assembly1.cif	{'ent_1': 2}	dimeric	2	PISA	author_and_software_defined_assembly
1258	3VBE	3vbe-assembly2.cif	{'ent_1': 2}	dimeric	2	PISA	author_and_software_defined_assembly
1259	1YIO	1yio-assembly1.cif	{'ent_1': 1}	monomeric	1	?	author_defined_assembly
1260	6OH9	6oh9-assembly1.cif	{'ent_1': 2}	dimeric	2	PISA	author_and_software_defined_assembly
1261	1YIS	1yis-assembly1.cif	{'ent_1': 4}	tetrameric	4	PISA,PQS	author_and_software_defined_assembly
1262	1YIR	1yir-assembly1.cif	{'ent_1': 1}	monomeric	1	?	author_defined_assembly
1263	1YIR	1yir-assembly2.cif	{'ent_1': 1}	monomeric	1	?	author_defined_assembly
1264	1YIR	1yir-assembly3.cif	{'ent_1': 1}	monomeric	1	?	author_defined_assembly
1265	1YIR	1yir-assembly4.cif	{'ent_1': 1}	monomeric	1	?	author_defined_assembly
1266	7L32	7l32-assembly1.cif	{'ent_1': 2}	dimeric	2	?	author_defined_assembly
1267	7L32	7l32-assembly2.cif	{'ent_1': 2}	dimeric	2	?	author_defined_assembly
1268	1YIY	1yiy-assembly1.cif	{'ent_1': 2}	dimeric	2	PISA	author_and_software_defined_assembly
1269	1YIX	1yix-assembly1.cif	{'ent_1': 1}	monomeric	1	?	author_defined_assembly
1270	1YIX	1yix-assembly2.cif	{'ent_1': 1}	monomeric	1	?	author_defined_assembly
1271	1YIZ	1yiz-assembly1.cif	{'ent_1': 2}	dimeric	2	PISA	author_and_software_defined_assembly
1272	7ACL	7acl-assembly1.cif	{'ent_1': 2}	dimeric	2	PISA	author_and_software_defined_assembly
1273	7ACO	7aco-assembly1.cif	{'ent_1': 2}	dimeric	2	PISA	author_and_software_defined_assembly
1274	7TEA	7tea-assembly1.cif	{'ent_3': 1, 'ent_2': 1, 'ent_1': 2}	tetrameric	4	PISA	author_and_software_defined_assembly
1275	7TEA	7tea-assembly2.cif	{'ent_3': 1, 'ent_2': 1, 'ent_1': 2}	tetrameric	4	PISA	author_and_software_defined_assembly
1276	5SYR	5syr-assembly1.cif	{'ent_1': 1}	monomeric	1	PISA	author_and_software_defined_assembly
1277	5SYR	5syr-assembly2.cif	{'ent_1': 1}	monomeric	1	PISA	author_and_software_defined_assembly
1278	5O4P	5o4p-assembly1.cif	{'ent_1': 1}	monomeric	1	?	author_defined_assembly
1279	5O4P	5o4p-assembly2.cif	{'ent_1': 1}	monomeric	1	?	author_defined_assembly
1280	5LGZ	5lgz-assembly1.cif	{'ent_1': 1}	monomeric	1	PISA	software_defined_assembly
1281	3LXT	3lxt-assembly1.cif	{'ent_1': 2}	dimeric	2	PISA	author_and_software_defined_assembly
1282	3LXT	3lxt-assembly2.cif	{'ent_1': 2}	dimeric	2	PISA	author_and_software_defined_assembly
1283	6OHK	6ohk-assembly1.cif	{'ent_1': 1}	monomeric	1	PISA	author_and_software_defined_assembly
1284	4IUY	4iuy-assembly1.cif	{'ent_1': 4}	tetrameric	4	PISA	author_and_software_defined_assembly
1285	4IUY	4iuy-assembly2.cif	{'ent_1': 4}	tetrameric	4	PISA	author_and_software_defined_assembly
1286	6BHX	6bhx-assembly1.cif	{'ent_2': 1, 'ent_1': 4}	pentameric	5	PISA	author_and_software_defined_assembly
1287	5LGX	5lgx-assembly1.cif	{'ent_1': 1}	monomeric	1	PISA	author_and_software_defined_assembly
1288	6VLS	6vls-assembly1.cif	{'ent_1': 1}	monomeric	1	?	author_defined_assembly
1289	6VLS	6vls-assembly2.cif	{'ent_1': 1}	monomeric	1	?	author_defined_assembly
1290	6VLS	6vls-assembly3.cif	{'ent_1': 1}	monomeric	1	?	author_defined_assembly
1291	6VLS	6vls-assembly4.cif	{'ent_1': 1}	monomeric	1	?	author_defined_assembly
1292	6OHA	6oha-assembly1.cif	{'ent_1': 2}	dimeric	2	PISA	author_and_software_defined_assembly
1293	6LS3	6ls3-assembly1.cif	{'ent_1': 24}	24-meric	24	PISA	author_and_software_defined_assembly
1294	6OHC	6ohc-assembly1.cif	{'ent_1': 2}	dimeric	2	PISA	author_and_software_defined_assembly
1295	6OHC	6ohc-assembly2.cif	{'ent_1': 2}	dimeric	2	PISA	author_and_software_defined_assembly
1296	6BHW	6bhw-assembly1.cif	{'ent_1': 4}	tetrameric	4	PISA	author_and_software_defined_assembly
1297	6BHW	6bhw-assembly2.cif	{'ent_1': 4}	tetrameric	4	PISA	author_and_software_defined_assembly
1298	6VLZ	6vlz-assembly1.cif	{'ent_15': 1, 'ent_14': 1, 'ent_31': 1, 'ent_30': 1, 'ent_33': 1, 'ent_32': 1, 'ent_35': 1, 'ent_34': 1, 'ent_37': 1, 'ent_36': 1, 'ent_39': 1, 'ent_38': 1, 'ent_79': 1, 'ent_78': 1, 'ent_75': 1, 'ent_74': 1, 'ent_77': 1, 'ent_76': 1, 'ent_71': 1, 'ent_70': 1, 'ent_73': 1, 'ent_72': 1, 'ent_48': 1, 'ent_84': 3, 'ent_85': 1, 'ent_86': 1, 'ent_87': 1, 'ent_80': 1, 'ent_81': 1, 'ent_82': 1, 'ent_83'…	90-meric	90	?	author_defined_assembly
1299	1YI1	1yi1-assembly1.cif	{'ent_1': 4}	tetrameric	4	PQS	author_and_software_defined_assembly
1300	1YI1	1yi1-assembly2.cif	{'ent_1': 2}	dimeric	2	PISA	software_defined_assembly
1301	1YI0	1yi0-assembly1.cif	{'ent_1': 4}	tetrameric	4	PQS	author_and_software_defined_assembly
1302	1YI0	1yi0-assembly2.cif	{'ent_1': 2}	dimeric	2	PISA	software_defined_assembly
1303	3EB4	3eb4-assembly1.cif	{'ent_1': 4}	tetrameric	4	PISA	author_and_software_defined_assembly
1304	3EB2	3eb2-assembly1.cif	{'ent_1': 4}	tetrameric	4	PISA	author_and_software_defined_assembly
1305	4IUO	4iuo-assembly1.cif	{'ent_1': 2}	dimeric	2	PISA	author_and_software_defined_assembly
1306	6VLB	6vlb-assembly1.cif	{'ent_1': 2}	dimeric	2	PISA	author_and_software_defined_assembly
1307	6VLC	6vlc-assembly1.cif	{'ent_1': 2}	dimeric	2	PISA	author_and_software_defined_assembly
1308	6VLC	6vlc-assembly2.cif	{'ent_1': 2}	dimeric	2	PISA	author_and_software_defined_assembly
1309	4IUB	4iub-assembly1.cif	{'ent_2': 1, 'ent_1': 1}	dimeric	2	PISA	author_and_software_defined_assembly
1310	4IUC	4iuc-assembly1.cif	{'ent_2': 1, 'ent_1': 1}	dimeric	2	PISA	author_and_software_defined_assembly
1311	6BHF	6bhf-assembly1.cif	{'ent_1': 2}	dimeric	2	PISA	author_and_software_defined_assembly
1312	3VB2	3vb2-assembly1.cif	{'ent_1': 2}	dimeric	2	PISA	author_and_software_defined_assembly
1313	4IUD	4iud-assembly1.cif	{'ent_2': 1, 'ent_1': 1}	dimeric	2	PISA	author_and_software_defined_assembly
1314	1KKM	1kkm-assembly1.cif	{'ent_2': 6, 'ent_1': 6}	dodecameric	12	PISA	author_and_software_defined_assembly
1315	1KKL	1kkl-assembly1.cif	{'ent_2': 6, 'ent_1': 6}	dodecameric	12	PISA	author_and_software_defined_assembly
1316	3OXN	3oxn-assembly1.cif	{'ent_1': 2}	dimeric	2	PISA	author_and_software_defined_assembly
1317	3OXN	3oxn-assembly2.cif	{'ent_1': 2}	dimeric	2	PISA	author_and_software_defined_assembly
1318	1KKH	1kkh-assembly1.cif	{'ent_1': 1}	monomeric	1	?	author_defined_assembly
1319	1WWR	1wwr-assembly1.cif	{'ent_1': 2}	dimeric	2	PISA	author_and_software_defined_assembly
1320	1WWR	1wwr-assembly2.cif	{'ent_1': 2}	dimeric	2	PISA	author_and_software_defined_assembly
1321	1WWR	1wwr-assembly3.cif	{'ent_1': 4}	tetrameric	4	PISA	software_defined_assembly
1322	1KKG	1kkg-assembly1.cif	{'ent_1': 1}	monomeric	1	?	author_defined_assembly
1323	1KKF	1kkf-assembly1.cif	{'ent_1': 2}	dimeric	2	PISA,PQS	author_and_software_defined_assembly
1324	6CQP	6cqp-assembly1.cif	{'ent_1': 2}	dimeric	2	?	author_defined_assembly
1325	1KKB	1kkb-assembly1.cif	{'ent_1': 2}	dimeric	2	PISA,PQS	author_and_software_defined_assembly
1326	3OXP	3oxp-assembly1.cif	{'ent_1': 2}	dimeric	2	PISA	author_and_software_defined_assembly
1327	1KKP	1kkp-assembly1.cif	{'ent_1': 2}	dimeric	2	PISA,PQS	author_and_software_defined_assembly
1328	1WWK	1wwk-assembly1.cif	{'ent_1': 2}	dimeric	2	PISA	author_and_software_defined_assembly
1329	6ZUR	6zur-assembly1.cif	{'ent_1': 2}	dimeric	2	PISA	author_and_software_defined_assembly
1330	6ZUP	6zup-assembly1.cif	{'ent_1': 2}	dimeric	2	PISA	author_and_software_defined_assembly
1331	6DRU	6dru-assembly1.cif	{'ent_1': 4}	tetrameric	4	?	author_defined_assembly
1332	6DRU	6dru-assembly2.cif	{'ent_1': 2}	dimeric	2	PISA	software_defined_assembly
1333	3WCQ	3wcq-assembly1.cif	{'ent_1': 1}	monomeric	1	PISA	author_and_software_defined_assembly
1334	6DRV	6drv-assembly1.cif	{'ent_1': 4}	tetrameric	4	?	author_defined_assembly
1335	3WLE	3wle-assembly1.cif	{'ent_1': 4}	tetrameric	4	PISA	author_and_software_defined_assembly
1336	2HYD	2hyd-assembly1.cif	{'ent_1': 2}	dimeric	2	PISA	author_and_software_defined_assembly
1337	6ZUJ	6zuj-assembly1.cif	{'ent_1': 2}	dimeric	2	?	author_defined_assembly
1338	6ZUJ	6zuj-assembly2.cif	{'ent_1': 2}	dimeric	2	?	author_defined_assembly
1339	6ZUI	6zui-assembly1.cif	{'ent_1': 1}	monomeric	1	PISA	author_and_software_defined_assembly
1340	4YJ5	4yj5-assembly1.cif	{'ent_1': 4}	tetrameric	4	PISA	author_and_software_defined_assembly
1341	6ZU1	6zu1-assembly1.cif	{'ent_49': 1, 'ent_9': 1, 'ent_8': 1, 'ent_59': 1, 'ent_3': 1, 'ent_2': 1, 'ent_1': 1, 'ent_58': 2, 'ent_7': 1, 'ent_6': 1, 'ent_5': 1, 'ent_4': 1, 'ent_31': 1, 'ent_30': 1, 'ent_19': 1, 'ent_32': 1, 'ent_35': 1, 'ent_34': 1, 'ent_37': 1, 'ent_36': 1, 'ent_13': 1, 'ent_12': 1, 'ent_11': 1, 'ent_10': 1, 'ent_17': 1, 'ent_16': 1, 'ent_15': 1, 'ent_14': 1, 'ent_57': 1, 'ent_61': 1, 'ent_56': 1, 'ent…	62-meric	62	?	author_defined_assembly
1342	6ZU0	6zu0-assembly1.cif	{'ent_1': 6}	hexameric	6	PISA	author_and_software_defined_assembly
1343	4YJM	4yjm-assembly1.cif	{'ent_1': 1}	monomeric	1	?	author_defined_assembly
1344	4YJM	4yjm-assembly2.cif	{'ent_1': 1}	monomeric	1	?	author_defined_assembly
1345	4YJM	4yjm-assembly3.cif	{'ent_1': 1}	monomeric	1	?	author_defined_assembly
1346	4YJM	4yjm-assembly4.cif	{'ent_1': 1}	monomeric	1	?	author_defined_assembly
1347	4YJM	4yjm-assembly5.cif	{'ent_1': 4}	tetrameric	4	PISA	software_defined_assembly
1348	6LSC	6lsc-assembly1.cif	{'ent_1': 2}	dimeric	2	PISA	author_and_software_defined_assembly
1349	4YJX	4yjx-assembly1.cif	{'ent_1': 1}	monomeric	1	PISA	author_and_software_defined_assembly
1350	4YJX	4yjx-assembly2.cif	{'ent_1': 1}	monomeric	1	PISA	author_and_software_defined_assembly
1351	4YJX	4yjx-assembly3.cif	{'ent_1': 1}	monomeric	1	PISA	author_and_software_defined_assembly
1352	4YJX	4yjx-assembly4.cif	{'ent_1': 1}	monomeric	1	PISA	author_and_software_defined_assembly
1353	1WW1	1ww1-assembly1.cif	{'ent_1': 2}	dimeric	2	PISA	author_and_software_defined_assembly
1354	6CQC	6cqc-assembly1.cif	{'ent_1': 1}	monomeric	1	PISA	author_and_software_defined_assembly
1355	6CQC	6cqc-assembly2.cif	{'ent_1': 1}	monomeric	1	PISA	author_and_software_defined_assembly
1356	6CQC	6cqc-assembly3.cif	{'ent_1': 1}	monomeric	1	PISA	author_and_software_defined_assembly
1357	6CQC	6cqc-assembly4.cif	{'ent_1': 1}	monomeric	1	PISA	author_and_software_defined_assembly
1358	1WW8	1ww8-assembly1.cif	{'ent_1': 2}	dimeric	2	PISA	author_and_software_defined_assembly
1359	6CN1	6cn1-assembly1.cif	{'ent_1': 4}	tetrameric	4	PISA	author_and_software_defined_assembly
1360	6CN1	6cn1-assembly2.cif	{'ent_1': 4}	tetrameric	4	PISA	author_and_software_defined_assembly
1361	6CQA	6cqa-assembly1.cif	{'ent_1': 1}	monomeric	1	PISA	author_and_software_defined_assembly
1362	1KK9	1kk9-assembly1.cif	{'ent_1': 1}	monomeric	1	?	author_defined_assembly
1363	3OX2	3ox2-assembly1.cif	{'ent_1': 2}	dimeric	2	PISA	author_and_software_defined_assembly
1364	1KK4	1kk4-assembly1.cif	{'ent_1': 3}	trimeric	3	PISA	author_and_software_defined_assembly
1365	1KK4	1kk4-assembly2.cif	{'ent_1': 3}	trimeric	3	PISA	author_and_software_defined_assembly
1366	1KK6	1kk6-assembly1.cif	{'ent_1': 3}	trimeric	3	PISA	author_and_software_defined_assembly
1367	3OX4	3ox4-assembly1.cif	{'ent_1': 2}	dimeric	2	PISA	author_and_software_defined_assembly
1368	3OX4	3ox4-assembly2.cif	{'ent_1': 2}	dimeric	2	PISA	author_and_software_defined_assembly
1369	1A1S	1a1s-assembly1.cif	{'ent_1': 1}	dodecameric	12	PISA,PQS	author_and_software_defined_assembly
1370	4AMA	4ama-assembly1.cif	{'ent_1': 4}	tetrameric	4	PISA	author_and_software_defined_assembly
1371	4LCQ	4lcq-assembly1.cif	{'ent_1': 4}	tetrameric	4	PISA	author_and_software_defined_assembly
1372	4LCS	4lcs-assembly1.cif	{'ent_1': 4}	tetrameric	4	PISA	author_and_software_defined_assembly
1373	4LCR	4lcr-assembly1.cif	{'ent_1': 4}	tetrameric	4	PISA	author_and_software_defined_assembly
1374	4LCM	4lcm-assembly1.cif	{'ent_1': 1}	monomeric	1	PISA	author_and_software_defined_assembly
1375	4LCM	4lcm-assembly2.cif	{'ent_1': 1}	monomeric	1	PISA	author_and_software_defined_assembly
1376	4LCM	4lcm-assembly3.cif	{'ent_1': 1}	monomeric	1	PISA	author_and_software_defined_assembly
1377	4LCM	4lcm-assembly4.cif	{'ent_1': 1}	monomeric	1	PISA	author_and_software_defined_assembly
1378	4LCL	4lcl-assembly1.cif	{'ent_1': 1}	monomeric	1	PISA	author_and_software_defined_assembly
1379	4LCL	4lcl-assembly2.cif	{'ent_1': 1}	monomeric	1	PISA	author_and_software_defined_assembly
1380	4AMY	4amy-assembly1.cif	{'ent_1': 1}	monomeric	1	PISA	software_defined_assembly
1381	4LCH	4lch-assembly1.cif	{'ent_1': 1}	monomeric	1	PISA	author_and_software_defined_assembly
1382	2HYT	2hyt-assembly1.cif	{'ent_1': 2}	dimeric	2	?	author_defined_assembly
1383	4LCE	4lce-assembly1.cif	{'ent_1': 2}	dimeric	2	PISA	author_and_software_defined_assembly
1384	4IY2	4iy2-assembly1.cif	{'ent_1': 2}	dimeric	2	PISA	author_and_software_defined_assembly
1385	4LCG	4lcg-assembly1.cif	{'ent_1': 1}	monomeric	1	PISA	author_and_software_defined_assembly
1386	4LCF	4lcf-assembly1.cif	{'ent_1': 1}	monomeric	1	PISA	author_and_software_defined_assembly
1387	4AMV	4amv-assembly1.cif	{'ent_1': 2}	dimeric	2	PISA	author_and_software_defined_assembly
1388	4AMV	4amv-assembly2.cif	{'ent_1': 2}	dimeric	2	PISA	author_and_software_defined_assembly
1389	4AMU	4amu-assembly1.cif	{'ent_1': 12}	dodecameric	12	PISA	author_and_software_defined_assembly
1390	4ZX8	4zx8-assembly1.cif	{'ent_1': 6}	hexameric	6	PISA	author_and_software_defined_assembly
1391	4ZX8	4zx8-assembly2.cif	{'ent_1': 6}	hexameric	6	PISA	author_and_software_defined_assembly
1392	4ZX9	4zx9-assembly1.cif	{'ent_1': 6}	hexameric	6	PISA	author_and_software_defined_assembly
1393	4ZX9	4zx9-assembly2.cif	{'ent_1': 6}	hexameric	6	PISA	author_and_software_defined_assembly
1394	2W16	2w16-assembly1.cif	{'ent_2': 2, 'ent_1': 1}	monomeric	1	PQS	author_and_software_defined_assembly
1395	2W16	2w16-assembly2.cif	{'ent_2': 1, 'ent_1': 1}	dimeric	2	PQS	author_and_software_defined_assembly
1396	4IY0	4iy0-assembly1.cif	{'ent_1': 2}	dimeric	2	PISA	author_and_software_defined_assembly
1397	3HY8	3hy8-assembly1.cif	{'ent_1': 2}	dimeric	2	PISA	author_and_software_defined_assembly
1398	4ZXZ	4zxz-assembly1.cif	{'ent_1': 2}	dimeric	2	PISA	author_and_software_defined_assembly
1399	2W1V	2w1v-assembly1.cif	{'ent_1': 2}	dimeric	2	PQS	software_defined_assembly
1400	4ZXP	4zxp-assembly1.cif	{'ent_1': 1}	monomeric	1	?	author_defined_assembly
1401	4ZXP	4zxp-assembly2.cif	{'ent_1': 1}	monomeric	1	?	author_defined_assembly
1402	4ZXP	4zxp-assembly3.cif	{'ent_1': 2}	dimeric	2	PISA	software_defined_assembly
1403	4ZXU	4zxu-assembly1.cif	{'ent_1': 4}	tetrameric	4	PISA	author_and_software_defined_assembly
1404	4ZXU	4zxu-assembly2.cif	{'ent_1': 4}	tetrameric	4	PISA	author_and_software_defined_assembly
1405	2W1B	2w1b-assembly1.cif	{'ent_1': 3}	trimeric	3	PISA	author_and_software_defined_assembly
1406	4ZXH	4zxh-assembly1.cif	{'ent_1': 1}	monomeric	1	PISA	author_and_software_defined_assembly
1407	4ZXI	4zxi-assembly1.cif	{'ent_1': 1}	monomeric	1	PISA	author_and_software_defined_assembly
1408	4LC9	4lc9-assembly1.cif	{'ent_2': 1, 'ent_1': 1}	dimeric	2	?	author_defined_assembly
1409	1A16	1a16-assembly1.cif	{'ent_1': 4}	tetrameric	4	?	author_defined_assembly
1410	4LC4	4lc4-assembly1.cif	{'ent_1': 2}	dimeric	2	PISA	author_and_software_defined_assembly
1411	4LC1	4lc1-assembly1.cif	{'ent_1': 2}	dimeric	2	PISA	author_and_software_defined_assembly
1412	4LC3	4lc3-assembly1.cif	{'ent_1': 2}	dimeric	2	PISA	software_defined_assembly
1413	5NPE	5npe-assembly1.cif	{'ent_1': 1}	monomeric	1	PISA	author_and_software_defined_assembly
1414	4AM8	4am8-assembly1.cif	{'ent_1': 3}	trimeric	3	PISA	author_and_software_defined_assembly
1415	4AM8	4am8-assembly2.cif	{'ent_1': 3}	trimeric	3	PISA	author_and_software_defined_assembly
1416	3O61	3o61-assembly1.cif	{'ent_1': 2}	dimeric	2	PISA	author_and_software_defined_assembly
1417	3O61	3o61-assembly2.cif	{'ent_1': 2}	dimeric	2	PISA	author_and_software_defined_assembly
1418	4AM3	4am3-assembly1.cif	{'ent_2': 4, 'ent_1': 3}	heptameric	7	PISA	author_and_software_defined_assembly
1419	6UQM	6uqm-assembly1.cif	{'ent_1': 2}	dimeric	2	PISA	author_and_software_defined_assembly
1420	2OLQ	2olq-assembly1.cif	{'ent_1': 1}	monomeric	1	?	author_defined_assembly
1421	2OLS	2ols-assembly1.cif	{'ent_1': 1}	monomeric	1	?	author_defined_assembly
1422	2OLS	2ols-assembly2.cif	{'ent_1': 2}	dimeric	2	PISA,PQS	software_defined_assembly
1423	2OLR	2olr-assembly1.cif	{'ent_1': 1}	monomeric	1	?	author_defined_assembly
1424	2OLU	2olu-assembly1.cif	{'ent_1': 1}	monomeric	1	?	author_defined_assembly
1425	2OLW	2olw-assembly1.cif	{'ent_1': 1}	monomeric	1	?	author_defined_assembly
1426	2OLW	2olw-assembly2.cif	{'ent_1': 1}	monomeric	1	?	author_defined_assembly
1427	2OLV	2olv-assembly1.cif	{'ent_1': 1}	monomeric	1	?	author_defined_assembly
1428	2OLV	2olv-assembly2.cif	{'ent_1': 1}	monomeric	1	?	author_defined_assembly
1429	2OLB	2olb-assembly1.cif	{'ent_2': 1, 'ent_1': 1}	dimeric	2	PISA	author_and_software_defined_assembly
1430	3O66	3o66-assembly1.cif	{'ent_1': 1}	monomeric	1	PISA	author_and_software_defined_assembly
1431	3O66	3o66-assembly2.cif	{'ent_1': 1}	monomeric	1	PISA	author_and_software_defined_assembly
1432	2OLK	2olk-assembly1.cif	{'ent_1': 4}	tetrameric	4	?	author_defined_assembly
1433	2OLJ	2olj-assembly1.cif	{'ent_1': 2}	dimeric	2	?	author_defined_assembly
1434	2OLO	2olo-assembly1.cif	{'ent_1': 1}	monomeric	1	?	author_defined_assembly
1435	2OLN	2oln-assembly1.cif	{'ent_1': 1}	monomeric	1	?	author_defined_assembly
1436	2ZDG	2zdg-assembly1.cif	{'ent_1': 2}	dimeric	2	PISA	author_and_software_defined_assembly
1437	2ZDG	2zdg-assembly2.cif	{'ent_1': 2}	dimeric	2	PISA	author_and_software_defined_assembly
1438	2ZDH	2zdh-assembly1.cif	{'ent_1': 2}	dimeric	2	PISA	author_and_software_defined_assembly
1439	2ZDH	2zdh-assembly2.cif	{'ent_1': 2}	dimeric	2	PISA	author_and_software_defined_assembly
1440	6UQE	6uqe-assembly1.cif	{'ent_3': 1, 'ent_2': 14, 'ent_1': 6, 'ent_4': 1}	22-meric	22	?	author_defined_assembly
1441	6G58	6g58-assembly1.cif	{'ent_1': 2}	dimeric	2	PISA	author_and_software_defined_assembly
1442	6G59	6g59-assembly1.cif	{'ent_1': 2}	dimeric	2	PISA	author_and_software_defined_assembly
1443	2ZDQ	2zdq-assembly1.cif	{'ent_1': 2}	dimeric	2	PISA	author_and_software_defined_assembly
1444	7US5	7us5-assembly1.cif	{'ent_1': 4}	tetrameric	4	PISA	author_and_software_defined_assembly
1445	6G56	6g56-assembly1.cif	{'ent_1': 2}	dimeric	2	PISA	author_and_software_defined_assembly
1446	7USF	7usf-assembly1.cif	{'ent_3': 2, 'ent_2': 2, 'ent_1': 8, 'ent_4': 2}	tetradecameric	14	?	complete point assembly
1447	6G5Z	6g5z-assembly1.cif	{'ent_1': 4}	tetrameric	4	PISA	author_and_software_defined_assembly
1448	6G5R	6g5r-assembly1.cif	{'ent_1': 1}	monomeric	1	PISA	author_and_software_defined_assembly
1449	6G5S	6g5s-assembly1.cif	{'ent_1': 1}	monomeric	1	PISA	author_and_software_defined_assembly
1450	1QCZ	1qcz-assembly1.cif	{'ent_1': 8}	octameric	8	PISA,PQS	author_and_software_defined_assembly
1451	5TF0	5tf0-assembly1.cif	{'ent_1': 2}	dimeric	2	PISA	author_and_software_defined_assembly
1452	5Z49	5z49-assembly1.cif	{'ent_1': 2}	dimeric	2	PISA	author_and_software_defined_assembly
1453	3DHZ	3dhz-assembly1.cif	{'ent_1': 2}	dimeric	2	PISA	author_and_software_defined_assembly
1454	5MT6	5mt6-assembly1.cif	{'ent_2': 1, 'ent_1': 1}	dimeric	2	PISA	author_and_software_defined_assembly
1455	5MT7	5mt7-assembly1.cif	{'ent_2': 1, 'ent_1': 1}	dimeric	2	PISA	author_and_software_defined_assembly
1456	7AM1	7am1-assembly1.cif	{'ent_1': 1}	monomeric	1	?	author_defined_assembly
1457	7AM1	7am1-assembly2.cif	{'ent_1': 1}	monomeric	1	?	author_defined_assembly
1458	7AM0	7am0-assembly1.cif	{'ent_1': 2}	dimeric	2	PISA	author_and_software_defined_assembly
1459	7AM0	7am0-assembly2.cif	{'ent_1': 2}	dimeric	2	PISA	author_and_software_defined_assembly
1460	6WFK	6wfk-assembly1.cif	{'ent_1': 1}	monomeric	1	?	author_defined_assembly
1461	6WFK	6wfk-assembly2.cif	{'ent_1': 1}	monomeric	1	?	author_defined_assembly
1462	6WFK	6wfk-assembly3.cif	{'ent_1': 1}	monomeric	1	?	author_defined_assembly
1463	5MT8	5mt8-assembly1.cif	{'ent_2': 1, 'ent_1': 1}	dimeric	2	PISA	author_and_software_defined_assembly
1464	2E2E	2e2e-assembly1.cif	{'ent_1': 2}	dimeric	2	?	author_defined_assembly
1465	5E0N	5e0n-assembly1.cif	{'ent_1': 3}	trimeric	3	PISA	author_and_software_defined_assembly
1466	2E2A	2e2a-assembly1.cif	{'ent_1': 3}	trimeric	3	PISA	author_and_software_defined_assembly
1467	2e+25	2e25-assembly1.cif	{'ent_1': 2}	dimeric	2	?	author_defined_assembly
1468	2e+21	2e21-assembly1.cif	{'ent_1': 2}	dimeric	2	PISA,PQS	author_and_software_defined_assembly
1469	2e+21	2e21-assembly2.cif	{'ent_1': 2}	dimeric	2	PISA,PQS	author_and_software_defined_assembly
1470	2e+20	2e20-assembly1.cif	{'ent_1': 2}	dimeric	2	PISA	author_and_software_defined_assembly
1471	2e+28	2e28-assembly1.cif	{'ent_1': 4}	tetrameric	4	PISA	author_and_software_defined_assembly
1472	5MTF	5mtf-assembly1.cif	{'ent_2': 6, 'ent_1': 6}	dodecameric	12	PISA	software_defined_assembly
1473	5Z4Y	5z4y-assembly1.cif	{'ent_1': 2}	dimeric	2	PISA	author_and_software_defined_assembly
1474	6G0K	6g0k-assembly1.cif	{'ent_1': 3}	trimeric	3	PISA	author_and_software_defined_assembly
1475	5Z4Z	5z4z-assembly1.cif	{'ent_1': 2}	dimeric	2	PISA	author_and_software_defined_assembly
1476	5Z4Z	5z4z-assembly2.cif	{'ent_1': 2}	dimeric	2	PISA	author_and_software_defined_assembly
1477	5MTS	5mts-assembly1.cif	{'ent_1': 1}	monomeric	1	?	author_defined_assembly
1478	5MTS	5mts-assembly2.cif	{'ent_1': 1}	monomeric	1	?	author_defined_assembly
1479	5MTZ	5mtz-assembly1.cif	{'ent_1': 1}	monomeric	1	?	author_defined_assembly
1480	5MTZ	5mtz-assembly2.cif	{'ent_1': 1}	monomeric	1	?	author_defined_assembly
1481	5D03	5d03-assembly1.cif	{'ent_1': 4}	tetrameric	4	PISA	author_and_software_defined_assembly
1482	5Z4O	5z4o-assembly1.cif	{'ent_1': 1}	monomeric	1	PISA	author_and_software_defined_assembly
1483	5Z4O	5z4o-assembly2.cif	{'ent_1': 1}	monomeric	1	PISA	author_and_software_defined_assembly
1484	5Z4H	5z4h-assembly1.cif	{'ent_1': 1}	monomeric	1	PISA	author_and_software_defined_assembly
1485	5Z4H	5z4h-assembly2.cif	{'ent_1': 1}	monomeric	1	PISA	author_and_software_defined_assembly
1486	7AMY	7amy-assembly1.cif	{'ent_1': 9}	nonameric	9	PISA	author_and_software_defined_assembly
1487	1FWP	1fwp-assembly1.cif	{'ent_1': 1}	monomeric	1	?	author_defined_assembly
1488	5FF3	5ff3-assembly1.cif	{'ent_1': 1}	monomeric	1	PISA	author_and_software_defined_assembly
1489	5FF2	5ff2-assembly1.cif	{'ent_1': 1}	monomeric	1	PISA	author_and_software_defined_assembly
1490	5FF0	5ff0-assembly1.cif	{'ent_1': 1}	monomeric	1	PISA	author_and_software_defined_assembly
1491	5FF7	5ff7-assembly1.cif	{'ent_1': 2}	dimeric	2	?	author_defined_assembly
1492	5FF7	5ff7-assembly2.cif	{'ent_1': 2}	dimeric	2	?	author_defined_assembly
1493	5FF5	5ff5-assembly1.cif	{'ent_1': 2}	dimeric	2	PISA	author_and_software_defined_assembly
1494	7NM7	7nm7-assembly1.cif	{'ent_1': 4}	tetrameric	4	PISA	author_and_software_defined_assembly
1495	7NM8	7nm8-assembly1.cif	{'ent_1': 4}	tetrameric	4	PISA	author_and_software_defined_assembly
1496	5FF9	5ff9-assembly1.cif	{'ent_1': 4}	tetrameric	4	PISA	author_and_software_defined_assembly
1497	5FF8	5ff8-assembly1.cif	{'ent_3': 1, 'ent_2': 1, 'ent_1': 1}	trimeric	3	PISA	author_and_software_defined_assembly
1498	7UXG	7uxg-assembly1.cif	{'ent_1': 1}	monomeric	1	?	author_defined_assembly
1499	3A0J	3a0j-assembly1.cif	{'ent_1': 1}	monomeric	1	PISA	author_and_software_defined_assembly
1500	3A0J	3a0j-assembly2.cif	{'ent_1': 1}	monomeric	1	PISA	author_and_software_defined_assembly
1501	3A0X	3a0x-assembly1.cif	{'ent_1': 1}	monomeric	1	PISA	author_and_software_defined_assembly
1502	3A0Y	3a0y-assembly1.cif	{'ent_1': 1}	monomeric	1	?	author_defined_assembly
1503	3A0Y	3a0y-assembly2.cif	{'ent_1': 1}	monomeric	1	?	author_defined_assembly
1504	3A0Z	3a0z-assembly1.cif	{'ent_1': 1}	monomeric	1	PISA	author_and_software_defined_assembly
1505	3A0Z	3a0z-assembly2.cif	{'ent_1': 1}	monomeric	1	PISA	author_and_software_defined_assembly
1506	3A0T	3a0t-assembly1.cif	{'ent_1': 1}	monomeric	1	PISA	author_and_software_defined_assembly
1507	3A0U	3a0u-assembly1.cif	{'ent_1': 1}	monomeric	1	PISA	author_and_software_defined_assembly
1508	7M6U	7m6u-assembly1.cif	{'ent_1': 2}	dimeric	2	PISA	author_and_software_defined_assembly
1509	7M6U	7m6u-assembly2.cif	{'ent_1': 2}	dimeric	2	PISA	author_and_software_defined_assembly
1510	3A0R	3a0r-assembly1.cif	{'ent_2': 2, 'ent_1': 2}	tetrameric	4	PISA	author_and_software_defined_assembly
1511	7M68	7m68-assembly1.cif	{'ent_1': 1}	monomeric	1	?	author_defined_assembly
1512	7M69	7m69-assembly1.cif	{'ent_1': 1}	monomeric	1	PISA	author_and_software_defined_assembly
1513	3A04	3a04-assembly1.cif	{'ent_1': 2}	dimeric	2	PISA	author_and_software_defined_assembly
1514	3A05	3a05-assembly1.cif	{'ent_1': 2}	dimeric	2	PISA	author_and_software_defined_assembly
1515	3TSB	3tsb-assembly1.cif	{'ent_1': 4}	tetrameric	4	PISA	author_and_software_defined_assembly
1516	3TSB	3tsb-assembly2.cif	{'ent_1': 4}	tetrameric	4	PISA	author_and_software_defined_assembly
1517	7NMB	7nmb-assembly1.cif	{'ent_1': 1}	monomeric	1	PISA	author_and_software_defined_assembly
1518	5FFF	5fff-assembly1.cif	{'ent_1': 4}	tetrameric	4	PISA	author_and_software_defined_assembly
1519	7NMP	7nmp-assembly1.cif	{'ent_1': 2}	dimeric	2	PISA	author_and_software_defined_assembly
1520	2IU6	2iu6-assembly1.cif	{'ent_1': 2}	dimeric	2	PQS	author_and_software_defined_assembly
1521	3QK6	3qk6-assembly1.cif	{'ent_1': 2}	dimeric	2	PISA	author_and_software_defined_assembly
1522	3IHA	3iha-assembly1.cif	{'ent_1': 2}	dimeric	2	PISA	author_and_software_defined_assembly
1523	3IHA	3iha-assembly2.cif	{'ent_1': 2}	dimeric	2	PISA	author_and_software_defined_assembly
1524	1FWM	1fwm-assembly1.cif	{'ent_1': 2}	dimeric	2	PISA	author_and_software_defined_assembly
1525	4AH6	4ah6-assembly1.cif	{'ent_1': 2}	dimeric	2	PISA	author_and_software_defined_assembly
1526	4AH6	4ah6-assembly2.cif	{'ent_1': 2}	dimeric	2	PISA	author_and_software_defined_assembly
1527	1GYJ	1gyj-assembly1.cif	{'ent_1': 2}	dimeric	2	PQS	author_and_software_defined_assembly
1528	6VH5	6vh5-assembly1.cif	{'ent_1': 2}	dimeric	2	PISA	author_and_software_defined_assembly
1529	6VH5	6vh5-assembly2.cif	{'ent_1': 2}	dimeric	2	PISA	author_and_software_defined_assembly
1530	1GYH	1gyh-assembly1.cif	{'ent_1': 1}	monomeric	1	PQS	author_and_software_defined_assembly
1531	1GYH	1gyh-assembly2.cif	{'ent_1': 1}	monomeric	1	PQS	author_and_software_defined_assembly
1532	1GYH	1gyh-assembly3.cif	{'ent_1': 1}	monomeric	1	PQS	author_and_software_defined_assembly
1533	1GYH	1gyh-assembly4.cif	{'ent_1': 1}	monomeric	1	PQS	author_and_software_defined_assembly
1534	1GYH	1gyh-assembly5.cif	{'ent_1': 1}	monomeric	1	PQS	author_and_software_defined_assembly
1535	1GYH	1gyh-assembly6.cif	{'ent_1': 1}	monomeric	1	PQS	author_and_software_defined_assembly
1536	3KJT	3kjt-assembly1.cif	{'ent_1': 1}	monomeric	1	PISA	author_and_software_defined_assembly
1537	1GYN	1gyn-assembly1.cif	{'ent_1': 2}	dimeric	2	PQS	author_and_software_defined_assembly
1538	1GYL	1gyl-assembly1.cif	{'ent_1': 8}	octameric	8	?	author_defined_assembly
1539	3KJX	3kjx-assembly1.cif	{'ent_1': 2}	dimeric	2	PISA	author_and_software_defined_assembly
1540	3KJX	3kjx-assembly2.cif	{'ent_1': 2}	dimeric	2	PISA	author_and_software_defined_assembly
1541	6HHM	6hhm-assembly1.cif	{'ent_1': 1}	monomeric	1	PISA	author_and_software_defined_assembly
1542	1GYE	1gye-assembly1.cif	{'ent_1': 1}	monomeric	1	PQS	author_and_software_defined_assembly
1543	1GYD	1gyd-assembly1.cif	{'ent_1': 1}	monomeric	1	PQS	author_and_software_defined_assembly
1544	6HHV	6hhv-assembly1.cif	{'ent_1': 2}	dimeric	2	PISA	author_and_software_defined_assembly
1545	6HHW	6hhw-assembly1.cif	{'ent_1': 2}	dimeric	2	PISA	author_and_software_defined_assembly
1546	1GYY	1gyy-assembly1.cif	{'ent_1': 2}	dimeric	2	PQS	author_and_software_defined_assembly
1547	1GYX	1gyx-assembly1.cif	{'ent_1': 2}	dimeric	2	PQS	author_and_software_defined_assembly
1548	3KJJ	3kjj-assembly1.cif	{'ent_1': 3}	trimeric	3	PISA	author_and_software_defined_assembly
1549	3KJJ	3kjj-assembly2.cif	{'ent_1': 3}	trimeric	3	PISA	author_and_software_defined_assembly
1550	3KJJ	3kjj-assembly3.cif	{'ent_1': 3}	trimeric	3	PISA	author_and_software_defined_assembly
1551	3KJJ	3kjj-assembly4.cif	{'ent_1': 3}	trimeric	3	PISA	author_and_software_defined_assembly
1552	3KJJ	3kjj-assembly5.cif	{'ent_1': 3}	trimeric	3	PISA	author_and_software_defined_assembly
1553	3KJJ	3kjj-assembly6.cif	{'ent_1': 3}	trimeric	3	PISA	author_and_software_defined_assembly
1554	3KJK	3kjk-assembly1.cif	{'ent_1': 3}	trimeric	3	PISA	author_and_software_defined_assembly
1555	3KJK	3kjk-assembly2.cif	{'ent_1': 3}	trimeric	3	PISA	author_and_software_defined_assembly
1556	3KJK	3kjk-assembly3.cif	{'ent_1': 3}	trimeric	3	PISA	author_and_software_defined_assembly
1557	3KJK	3kjk-assembly4.cif	{'ent_1': 3}	trimeric	3	PISA	author_and_software_defined_assembly
1558	6HHZ	6hhz-assembly1.cif	{'ent_1': 2}	dimeric	2	PISA	author_and_software_defined_assembly
1559	6HHX	6hhx-assembly1.cif	{'ent_1': 2}	dimeric	2	PISA	author_and_software_defined_assembly
1560	1GYT	1gyt-assembly1.cif	{'ent_1': 6}	hexameric	6	PQS	author_and_software_defined_assembly
1561	1GYT	1gyt-assembly2.cif	{'ent_1': 6}	hexameric	6	PQS	author_and_software_defined_assembly
1562	6UQ8	6uq8-assembly1.cif	{'ent_1': 2}	dimeric	2	PISA	author_and_software_defined_assembly
1563	3EFS	3efs-assembly1.cif	{'ent_1': 1}	monomeric	1	PISA	author_and_software_defined_assembly
1564	3EFS	3efs-assembly2.cif	{'ent_1': 1}	monomeric	1	PISA	author_and_software_defined_assembly
1565	6O3P	6o3p-assembly1.cif	{'ent_1': 2}	dimeric	2	PISA	author_and_software_defined_assembly
1566	3EFP	3efp-assembly1.cif	{'ent_1': 1}	monomeric	1	PISA	author_and_software_defined_assembly
1567	3EFP	3efp-assembly2.cif	{'ent_1': 1}	monomeric	1	PISA	author_and_software_defined_assembly
1568	1GY9	1gy9-assembly1.cif	{'ent_1': 4}	tetrameric	4	PISA	software_defined_assembly
1569	1GY9	1gy9-assembly2.cif	{'ent_1': 4}	tetrameric	4	PISA	software_defined_assembly
1570	1GY8	1gy8-assembly1.cif	{'ent_1': 2}	dimeric	2	PQS	author_and_software_defined_assembly
1571	1GY8	1gy8-assembly2.cif	{'ent_1': 2}	dimeric	2	PQS	author_and_software_defined_assembly
1572	6HH3	6hh3-assembly1.cif	{'ent_1': 1}	monomeric	1	?	author_defined_assembly
1573	6HH3	6hh3-assembly2.cif	{'ent_1': 1}	monomeric	1	?	author_defined_assembly
1574	1YMY	1ymy-assembly1.cif	{'ent_1': 2}	dimeric	2	?	author_defined_assembly
1575	6O3F	6o3f-assembly1.cif	{'ent_1': 2}	dimeric	2	?	author_defined_assembly
1576	6HH9	6hh9-assembly1.cif	{'ent_1': 1}	monomeric	1	?	author_defined_assembly
1577	6HH9	6hh9-assembly2.cif	{'ent_1': 1}	monomeric	1	?	author_defined_assembly
1578	6HH9	6hh9-assembly3.cif	{'ent_1': 1}	monomeric	1	?	author_defined_assembly
1579	6HH9	6hh9-assembly4.cif	{'ent_1': 1}	monomeric	1	?	author_defined_assembly
1580	3QKU	3qku-assembly1.cif	{'ent_2': 1, 'ent_1': 1}	dimeric	2	PISA	software_defined_assembly
1581	3QKU	3qku-assembly2.cif	{'ent_2': 1, 'ent_1': 1}	monomeric	1	PISA	software_defined_assembly
1582	3QKT	3qkt-assembly1.cif	{'ent_1': 2}	dimeric	2	PISA	author_and_software_defined_assembly
1583	3QKT	3qkt-assembly2.cif	{'ent_1': 2}	dimeric	2	PISA	author_and_software_defined_assembly
1584	6BDO	6bdo-assembly1.cif	{'ent_1': 2}	dimeric	2	PISA	author_and_software_defined_assembly
1585	6BDO	6bdo-assembly2.cif	{'ent_1': 2}	dimeric	2	PISA	author_and_software_defined_assembly
1586	1YMU	1ymu-assembly1.cif	{'ent_1': 2}	dimeric	2	PISA	author_and_software_defined_assembly
1587	3QKE	3qke-assembly1.cif	{'ent_1': 2}	dimeric	2	PISA	author_and_software_defined_assembly
1588	3QKE	3qke-assembly2.cif	{'ent_1': 2}	dimeric	2	PISA	author_and_software_defined_assembly
1589	3QKE	3qke-assembly3.cif	{'ent_1': 2}	dimeric	2	PISA	author_and_software_defined_assembly
1590	3QKE	3qke-assembly4.cif	{'ent_1': 2}	dimeric	2	PISA	author_and_software_defined_assembly
1591	1WLE	1wle-assembly1.cif	{'ent_1': 2}	dimeric	2	PISA	author_and_software_defined_assembly
1592	3PCO	3pco-assembly1.cif	{'ent_2': 2, 'ent_1': 2}	tetrameric	4	PISA	author_and_software_defined_assembly
1593	8DT1	8dt1-assembly1.cif	{'ent_1': 4}	tetrameric	4	PISA	author_and_software_defined_assembly
1594	1WLT	1wlt-assembly1.cif	{'ent_1': 2}	dimeric	2	PISA	author_and_software_defined_assembly
1595	1WLU	1wlu-assembly1.cif	{'ent_1': 4}	tetrameric	4	PISA,PQS	author_and_software_defined_assembly
1596	1WLV	1wlv-assembly1.cif	{'ent_1': 4}	tetrameric	4	PISA	author_and_software_defined_assembly
1597	1WLV	1wlv-assembly2.cif	{'ent_1': 4}	tetrameric	4	PISA	author_and_software_defined_assembly
1598	2H99	2h99-assembly1.cif	{'ent_1': 2}	dimeric	2	PISA	author_and_software_defined_assembly
1599	2H98	2h98-assembly1.cif	{'ent_1': 2}	dimeric	2	?	author_defined_assembly
1600	1WLR	1wlr-assembly1.cif	{'ent_1': 4}	tetrameric	4	?	author_defined_assembly
1601	1WLS	1wls-assembly1.cif	{'ent_1': 2}	dimeric	2	PISA	author_and_software_defined_assembly
1602	6BDG	6bdg-assembly1.cif	{'ent_1': 6}	hexameric	6	PISA	author_and_software_defined_assembly
1603	1WLY	1wly-assembly1.cif	{'ent_1': 1}	monomeric	1	?	author_defined_assembly
1604	1WLY	1wly-assembly2.cif	{'ent_1': 2}	dimeric	2	PISA,PQS	software_defined_assembly
1605	2H92	2h92-assembly1.cif	{'ent_1': 1}	monomeric	1	?	author_defined_assembly
1606	2H92	2h92-assembly2.cif	{'ent_1': 1}	monomeric	1	?	author_defined_assembly
1607	2H92	2h92-assembly3.cif	{'ent_1': 1}	monomeric	1	?	author_defined_assembly
1608	4E7P	4e7p-assembly1.cif	{'ent_1': 2}	dimeric	2	?	author_defined_assembly
1609	4E7P	4e7p-assembly2.cif	{'ent_1': 2}	dimeric	2	PISA	software_defined_assembly
1610	3EFB	3efb-assembly1.cif	{'ent_1': 2}	dimeric	2	PISA	author_and_software_defined_assembly
1611	3EFB	3efb-assembly2.cif	{'ent_1': 2}	dimeric	2	PISA	author_and_software_defined_assembly
1612	1FUX	1fux-assembly1.cif	{'ent_1': 2}	dimeric	2	PISA	author_and_software_defined_assembly
1613	1FUY	1fuy-assembly1.cif	{'ent_2': 2, 'ent_1': 2}	tetrameric	4	?	author_defined_assembly
1614	6FVL	6fvl-assembly1.cif	{'ent_2': 2, 'ent_1': 2}	tetrameric	4	PISA	author_and_software_defined_assembly
1615	6FVL	6fvl-assembly2.cif	{'ent_2': 2, 'ent_1': 2}	tetrameric	4	PISA	author_and_software_defined_assembly
1616	6OLT	6olt-assembly1.cif	{'ent_2': 2, 'ent_1': 2}	tetrameric	4	PISA	author_and_software_defined_assembly
1617	1FUR	1fur-assembly1.cif	{'ent_1': 4}	tetrameric	4	PISA,PQS	author_and_software_defined_assembly
1618	6ZJK	6zjk-assembly1.cif	{'ent_1': 2}	dimeric	2	PISA	author_and_software_defined_assembly
1619	6ZJK	6zjk-assembly2.cif	{'ent_1': 2}	dimeric	2	PISA	author_and_software_defined_assembly
1620	1FUP	1fup-assembly1.cif	{'ent_1': 4}	tetrameric	4	PISA,PQS	author_and_software_defined_assembly
1621	1FUQ	1fuq-assembly1.cif	{'ent_1': 4}	tetrameric	4	PISA,PQS	author_and_software_defined_assembly
1622	6ZJN	6zjn-assembly1.cif	{'ent_13': 1, 'ent_12': 1, 'ent_11': 1, 'ent_10': 1, 'ent_15': 1, 'ent_14': 1, 'ent_9': 1, 'ent_8': 1, 'ent_3': 1, 'ent_2': 1, 'ent_1': 1, 'ent_7': 1, 'ent_6': 1, 'ent_5': 1, 'ent_4': 1}	pentadecameric	15	?	author_defined_assembly
1623	6ZJO	6zjo-assembly1.cif	{'ent_1': 2}	dimeric	2	?	author_defined_assembly
1624	6ZJL	6zjl-assembly1.cif	{'ent_13': 1, 'ent_12': 1, 'ent_11': 1, 'ent_10': 1, 'ent_15': 1, 'ent_14': 1, 'ent_9': 1, 'ent_8': 1, 'ent_3': 1, 'ent_2': 1, 'ent_1': 1, 'ent_7': 1, 'ent_6': 1, 'ent_5': 1, 'ent_4': 1}	pentadecameric	15	?	author_defined_assembly
1625	1FUU	1fuu-assembly1.cif	{'ent_1': 2}	dimeric	2	?	author_defined_assembly
1626	4E7B	4e7b-assembly1.cif	{'ent_1': 1}	monomeric	1	PISA	author_and_software_defined_assembly
1627	4E7B	4e7b-assembly2.cif	{'ent_1': 1}	monomeric	1	PISA	author_and_software_defined_assembly
1628	4E7B	4e7b-assembly3.cif	{'ent_1': 1}	monomeric	1	PISA	author_and_software_defined_assembly
1629	4E7B	4e7b-assembly4.cif	{'ent_1': 1}	monomeric	1	PISA	author_and_software_defined_assembly
1630	1FUI	1fui-assembly1.cif	{'ent_1': 3}	trimeric	3	PISA	author_and_software_defined_assembly
1631	1FUI	1fui-assembly2.cif	{'ent_1': 3}	trimeric	3	PISA	author_and_software_defined_assembly
1632	1FUI	1fui-assembly3.cif	{'ent_1': 6}	hexameric	6	PISA	software_defined_assembly
1633	4E7D	4e7d-assembly1.cif	{'ent_1': 1}	monomeric	1	?	author_defined_assembly
1634	4E7D	4e7d-assembly2.cif	{'ent_1': 1}	monomeric	1	?	author_defined_assembly
1635	4E7D	4e7d-assembly3.cif	{'ent_1': 1}	monomeric	1	?	author_defined_assembly
1636	4E7D	4e7d-assembly4.cif	{'ent_1': 1}	monomeric	1	?	author_defined_assembly
1637	1FUO	1fuo-assembly1.cif	{'ent_1': 4}	tetrameric	4	PISA,PQS	author_and_software_defined_assembly
1638	4E7F	4e7f-assembly1.cif	{'ent_1': 1}	monomeric	1	?	author_defined_assembly
1639	4E7F	4e7f-assembly2.cif	{'ent_1': 1}	monomeric	1	?	author_defined_assembly
1640	4E7F	4e7f-assembly3.cif	{'ent_1': 1}	monomeric	1	?	author_defined_assembly
1641	4E7F	4e7f-assembly4.cif	{'ent_1': 1}	monomeric	1	?	author_defined_assembly
1642	4E7G	4e7g-assembly1.cif	{'ent_1': 1}	monomeric	1	PISA	author_and_software_defined_assembly
1643	4E7H	4e7h-assembly1.cif	{'ent_3': 2, 'ent_2': 2, 'ent_1': 4}	octameric	8	PISA	author_and_software_defined_assembly
1644	4E7I	4e7i-assembly1.cif	{'ent_3': 2, 'ent_2': 2, 'ent_1': 4}	octameric	8	PISA	author_and_software_defined_assembly
1645	4E7J	4e7j-assembly1.cif	{'ent_3': 2, 'ent_2': 2, 'ent_1': 4, 'ent_4': 2}	decameric	10	PISA	author_and_software_defined_assembly
1646	1FUA	1fua-assembly1.cif	{'ent_1': 4}	tetrameric	4	PISA,PQS	author_and_software_defined_assembly
1647	4E7L	4e7l-assembly1.cif	{'ent_3': 2, 'ent_2': 2, 'ent_1': 4, 'ent_5': 2, 'ent_4': 2}	dodecameric	12	PISA	author_and_software_defined_assembly
1648	1FUG	1fug-assembly1.cif	{'ent_1': 4}	tetrameric	4	PISA,PQS	author_and_software_defined_assembly
1649	4E7O	4e7o-assembly1.cif	{'ent_1': 2}	dimeric	2	?	author_defined_assembly
1650	1FU8	1fu8-assembly1.cif	{'ent_1': 2}	dimeric	2	PISA,PQS	author_and_software_defined_assembly
1651	4e+75	4e75-assembly1.cif	{'ent_1': 3}	trimeric	3	PISA	author_and_software_defined_assembly
1652	4e+75	4e75-assembly2.cif	{'ent_1': 3}	trimeric	3	PISA	author_and_software_defined_assembly
1653	4e+77	4e77-assembly1.cif	{'ent_1': 2}	dimeric	2	PISA	author_and_software_defined_assembly
1654	4e+79	4e79-assembly1.cif	{'ent_1': 3}	trimeric	3	PISA	author_and_software_defined_assembly
1655	1FU0	1fu0-assembly1.cif	{'ent_1': 1}	monomeric	1	?	author_defined_assembly
1656	1FU0	1fu0-assembly2.cif	{'ent_1': 1}	monomeric	1	?	author_defined_assembly
1657	1FU7	1fu7-assembly1.cif	{'ent_1': 2}	dimeric	2	PISA,PQS	author_and_software_defined_assembly
1658	1FU4	1fu4-assembly1.cif	{'ent_1': 2}	dimeric	2	PISA,PQS	author_and_software_defined_assembly
1659	6ZJ2	6zj2-assembly1.cif	{'ent_3': 1, 'ent_2': 1, 'ent_1': 2}	tetrameric	4	?	author_defined_assembly
1660	6ZJ2	6zj2-assembly2.cif	{'ent_3': 1, 'ent_2': 1, 'ent_1': 2}	tetrameric	4	?	author_defined_assembly
1661	6ZJ2	6zj2-assembly3.cif	{'ent_1': 4}	tetrameric	4	?	author_defined_assembly
1662	6FV8	6fv8-assembly1.cif	{'ent_1': 2}	dimeric	2	PISA	author_and_software_defined_assembly
1663	6FV3	6fv3-assembly1.cif	{'ent_1': 2}	dimeric	2	PISA	author_and_software_defined_assembly
1664	6FV3	6fv3-assembly2.cif	{'ent_1': 2}	dimeric	2	PISA	author_and_software_defined_assembly
1665	6FV6	6fv6-assembly1.cif	{'ent_1': 1}	monomeric	1	PISA	author_and_software_defined_assembly
1666	6FV7	6fv7-assembly1.cif	{'ent_1': 2}	dimeric	2	PISA	author_and_software_defined_assembly
1667	6FV4	6fv4-assembly1.cif	{'ent_1': 2}	dimeric	2	PISA	author_and_software_defined_assembly
1668	2H9F	2h9f-assembly1.cif	{'ent_1': 2}	dimeric	2	PISA,PQS	author_and_software_defined_assembly
1669	1V58	1v58-assembly1.cif	{'ent_1': 2}	dimeric	2	?	author_defined_assembly
1670	1V58	1v58-assembly2.cif	{'ent_1': 2}	dimeric	2	?	author_defined_assembly
1671	2H9B	2h9b-assembly1.cif	{'ent_1': 2}	dimeric	2	PISA	author_and_software_defined_assembly
1672	8DTE	8dte-assembly1.cif	{'ent_1': 1}	monomeric	1	?	author_defined_assembly
1673	1WL6	1wl6-assembly1.cif	{'ent_1': 4}	tetrameric	4	PQS	author_and_software_defined_assembly
1674	1WL6	1wl6-assembly2.cif	{'ent_1': 2}	dimeric	2	PISA	software_defined_assembly
1675	1WL8	1wl8-assembly1.cif	{'ent_1': 1}	monomeric	1	?	author_defined_assembly
1676	1WL9	1wl9-assembly1.cif	{'ent_1': 4}	tetrameric	4	?	author_defined_assembly
1677	3IH9	3ih9-assembly1.cif	{'ent_1': 2}	dimeric	2	PISA	author_and_software_defined_assembly
1678	3IH9	3ih9-assembly2.cif	{'ent_1': 2}	dimeric	2	PISA	author_and_software_defined_assembly
1679	3I3M	3i3m-assembly1.cif	{'ent_2': 1, 'ent_1': 1}	dimeric	2	PISA	author_and_software_defined_assembly
1680	3I3L	3i3l-assembly1.cif	{'ent_1': 1}	monomeric	1	PISA	author_and_software_defined_assembly
1681	3I3O	3i3o-assembly1.cif	{'ent_1': 4}	tetrameric	4	PISA	author_and_software_defined_assembly
1682	3I3O	3i3o-assembly2.cif	{'ent_1': 4}	tetrameric	4	PISA	author_and_software_defined_assembly
1683	3I3E	3i3e-assembly1.cif	{'ent_1': 4}	tetrameric	4	PISA	software_defined_assembly
1684	3I3D	3i3d-assembly1.cif	{'ent_1': 4}	tetrameric	4	PISA	software_defined_assembly
1685	3I3F	3i3f-assembly1.cif	{'ent_1': 3}	trimeric	3	PISA	author_and_software_defined_assembly
1686	3I3A	3i3a-assembly1.cif	{'ent_1': 3}	trimeric	3	PISA	author_and_software_defined_assembly
1687	3I3A	3i3a-assembly2.cif	{'ent_1': 3}	trimeric	3	PISA	author_and_software_defined_assembly
1688	3I3A	3i3a-assembly3.cif	{'ent_1': 3}	trimeric	3	PISA	author_and_software_defined_assembly
1689	1VJE	1vje-assembly1.cif	{'ent_1': 2}	dimeric	2	PISA	author_and_software_defined_assembly
1690	3I3B	3i3b-assembly1.cif	{'ent_1': 4}	tetrameric	4	PISA	software_defined_assembly
1691	3I3Y	3i3y-assembly1.cif	{'ent_1': 2}	dimeric	2	PISA	author_and_software_defined_assembly
1692	3I3Y	3i3y-assembly2.cif	{'ent_1': 2}	dimeric	2	PISA	author_and_software_defined_assembly
1693	3I3X	3i3x-assembly1.cif	{'ent_1': 3}	trimeric	3	PISA	author_and_software_defined_assembly
1694	3I3X	3i3x-assembly2.cif	{'ent_1': 3}	trimeric	3	PISA	author_and_software_defined_assembly
1695	3I3X	3i3x-assembly3.cif	{'ent_1': 3}	trimeric	3	PISA	author_and_software_defined_assembly
1696	3ZUG	3zug-assembly1.cif	{'ent_1': 6}	hexameric	6	PISA	author_and_software_defined_assembly
1697	1VJS	1vjs-assembly1.cif	{'ent_1': 1}	monomeric	1	?	author_defined_assembly
1698	1VJR	1vjr-assembly1.cif	{'ent_1': 1}	monomeric	1	?	author_defined_assembly
1699	3I3W	3i3w-assembly1.cif	{'ent_1': 2}	dimeric	2	PISA	author_and_software_defined_assembly
1700	3I3Q	3i3q-assembly1.cif	{'ent_1': 1}	monomeric	1	PISA	author_and_software_defined_assembly
1701	3I3Q	3i3q-assembly2.cif	{'ent_1': 1}	monomeric	1	PISA	author_and_software_defined_assembly
1702	1VJU	1vju-assembly1.cif	{'ent_1': 1}	monomeric	1	?	author_defined_assembly
1703	1VJU	1vju-assembly2.cif	{'ent_1': 1}	monomeric	1	?	author_defined_assembly
1704	5HEA	5hea-assembly1.cif	{'ent_1': 6}	hexameric	6	PISA	author_and_software_defined_assembly
1705	1OAZ	1oaz-assembly1.cif	{'ent_3': 1, 'ent_2': 1, 'ent_1': 1}	trimeric	3	PQS	author_and_software_defined_assembly
1706	1OAZ	1oaz-assembly2.cif	{'ent_3': 1, 'ent_2': 1, 'ent_1': 1}	trimeric	3	PQS	author_and_software_defined_assembly
1707	2CVZ	2cvz-assembly1.cif	{'ent_1': 4}	tetrameric	4	PISA	author_and_software_defined_assembly
1708	2CVY	2cvy-assembly1.cif	{'ent_2': 2, 'ent_1': 2}	tetrameric	4	?	author_defined_assembly
1709	2CVX	2cvx-assembly1.cif	{'ent_1': 2}	dimeric	2	?	author_defined_assembly
1710	2CVW	2cvw-assembly1.cif	{'ent_1': 2}	dimeric	2	?	author_defined_assembly
1711	2CVV	2cvv-assembly1.cif	{'ent_1': 2}	dimeric	2	?	author_defined_assembly
1712	2CVU	2cvu-assembly1.cif	{'ent_1': 2}	dimeric	2	?	author_defined_assembly
1713	1OAP	1oap-assembly1.cif	{'ent_1': 1}	monomeric	1	PQS	author_and_software_defined_assembly
1714	2CVS	2cvs-assembly1.cif	{'ent_1': 2}	dimeric	2	?	author_defined_assembly
1715	1OAT	1oat-assembly1.cif	{'ent_1': 2}	dimeric	2	PISA,PQS	author_and_software_defined_assembly
1716	1OAT	1oat-assembly2.cif	{'ent_1': 2}	dimeric	2	PISA,PQS	author_and_software_defined_assembly
1717	2CVO	2cvo-assembly1.cif	{'ent_1': 4}	tetrameric	4	PISA	author_and_software_defined_assembly
1718	1OAJ	1oaj-assembly1.cif	{'ent_1': 2}	dimeric	2	PQS	author_and_software_defined_assembly
1719	6GPK	6gpk-assembly1.cif	{'ent_1': 4}	tetrameric	4	PISA	author_and_software_defined_assembly
1720	1OAH	1oah-assembly1.cif	{'ent_1': 2}	dimeric	2	PQS	author_and_software_defined_assembly
1721	2CVK	2cvk-assembly1.cif	{'ent_1': 1}	monomeric	1	?	author_defined_assembly
1722	6GPL	6gpl-assembly1.cif	{'ent_1': 4}	tetrameric	4	PISA	author_and_software_defined_assembly
1723	6GPN	6gpn-assembly1.cif	{'ent_1': 4}	tetrameric	4	?	author_defined_assembly
1724	6GPN	6gpn-assembly2.cif	{'ent_1': 4}	tetrameric	4	?	author_defined_assembly
1725	1OAC	1oac-assembly1.cif	{'ent_1': 2}	dimeric	2	PISA	author_and_software_defined_assembly
1726	1OAB	1oab-assembly1.cif	{'ent_1': 2}	dimeric	2	PQS	author_and_software_defined_assembly
1727	6GPC	6gpc-assembly1.cif	{'ent_1': 1}	monomeric	1	PISA	author_and_software_defined_assembly
1728	6GPC	6gpc-assembly2.cif	{'ent_1': 1}	monomeric	1	PISA	author_and_software_defined_assembly
1729	1AW8	1aw8-assembly1.cif	{'ent_2': 4, 'ent_1': 4}	octameric	8	PISA,PQS	author_and_software_defined_assembly
1730	6GPE	6gpe-assembly1.cif	{'ent_1': 4}	tetrameric	4	?	author_defined_assembly
1731	6GPE	6gpe-assembly2.cif	{'ent_1': 4}	tetrameric	4	?	author_defined_assembly
1732	6GPD	6gpd-assembly1.cif	{'ent_1': 1}	monomeric	1	PISA	author_and_software_defined_assembly
1733	6GPD	6gpd-assembly2.cif	{'ent_1': 1}	monomeric	1	PISA	author_and_software_defined_assembly
1734	1OAD	1oad-assembly1.cif	{'ent_1': 4}	tetrameric	4	PQS	author_and_software_defined_assembly
1735	3J8G	3j8g-assembly1.cif	{'ent_31': 1, 'ent_29': 1, 'ent_30': 1, 'ent_20': 1, 'ent_32': 1, 'ent_9': 1, 'ent_21': 1, 'ent_3': 1, 'ent_2': 1, 'ent_1': 1, 'ent_7': 1, 'ent_6': 1, 'ent_5': 1, 'ent_4': 1, 'ent_22': 1, 'ent_23': 1, 'ent_19': 1, 'ent_18': 1, 'ent_26': 1, 'ent_27': 1, 'ent_24': 1, 'ent_25': 1, 'ent_13': 1, 'ent_12': 1, 'ent_11': 1, 'ent_10': 1, 'ent_17': 1, 'ent_16': 1, 'ent_15': 1, 'ent_14': 1, 'ent_8': 1, 'ent…	32-meric	32	?	author_defined_assembly
1736	3OTM	3otm-assembly1.cif	{'ent_1': 3}	trimeric	3	PISA	author_and_software_defined_assembly
1737	1OA1	1oa1-assembly1.cif	{'ent_1': 1}	monomeric	1	PISA	author_and_software_defined_assembly
1738	1OA0	1oa0-assembly1.cif	{'ent_1': 1}	monomeric	1	PQS	author_and_software_defined_assembly
1739	1OA0	1oa0-assembly2.cif	{'ent_1': 1}	monomeric	1	PQS	author_and_software_defined_assembly
1740	2CV2	2cv2-assembly1.cif	{'ent_2': 1, 'ent_1': 1}	dimeric	2	?	author_defined_assembly
1741	2CV2	2cv2-assembly2.cif	{'ent_2': 1, 'ent_1': 1}	dimeric	2	?	author_defined_assembly
1742	2CV1	2cv1-assembly1.cif	{'ent_2': 1, 'ent_1': 1}	dimeric	2	?	author_defined_assembly
1743	2CV1	2cv1-assembly2.cif	{'ent_2': 1, 'ent_1': 1}	dimeric	2	?	author_defined_assembly
1744	2CV0	2cv0-assembly1.cif	{'ent_2': 1, 'ent_1': 1}	dimeric	2	?	author_defined_assembly
1745	2CV0	2cv0-assembly2.cif	{'ent_2': 1, 'ent_1': 1}	dimeric	2	?	author_defined_assembly
1746	6JJ1	6jj1-assembly1.cif	{'ent_1': 1}	monomeric	1	PISA	author_and_software_defined_assembly
1747	4P3N	4p3n-assembly1.cif	{'ent_1': 2}	dimeric	2	PISA	software_defined_assembly
1748	4P3N	4p3n-assembly2.cif	{'ent_1': 2}	dimeric	2	PISA	software_defined_assembly
1749	3ZU0	3zu0-assembly1.cif	{'ent_1': 2}	dimeric	2	PISA	author_and_software_defined_assembly
1750	3ZU6	3zu6-assembly1.cif	{'ent_1': 2}	dimeric	2	PISA	author_and_software_defined_assembly
1751	4LHD	4lhd-assembly1.cif	{'ent_1': 2}	dimeric	2	PISA	author_and_software_defined_assembly
1752	5Q08	5q08-assembly1.cif	{'ent_1': 4}	tetrameric	4	PISA	author_and_software_defined_assembly
1753	5Q08	5q08-assembly2.cif	{'ent_1': 4}	tetrameric	4	PISA	author_and_software_defined_assembly
1754	5Q09	5q09-assembly1.cif	{'ent_1': 4}	tetrameric	4	PISA	author_and_software_defined_assembly
1755	5Q09	5q09-assembly2.cif	{'ent_1': 4}	tetrameric	4	PISA	author_and_software_defined_assembly
1756	3I38	3i38-assembly1.cif	{'ent_1': 2}	dimeric	2	PISA	software_defined_assembly
1757	3I38	3i38-assembly2.cif	{'ent_1': 2}	dimeric	2	PISA	software_defined_assembly
1758	3I38	3i38-assembly3.cif	{'ent_1': 2}	dimeric	2	PISA	software_defined_assembly
1759	3I38	3i38-assembly4.cif	{'ent_1': 2}	dimeric	2	PISA	software_defined_assembly
1760	3I38	3i38-assembly5.cif	{'ent_1': 2}	dimeric	2	PISA	software_defined_assembly
1761	3I38	3i38-assembly6.cif	{'ent_1': 2}	dimeric	2	PISA	software_defined_assembly
1762	3I38	3i38-assembly7.cif	{'ent_1': 12}	dodecameric	12	PQS	author_and_software_defined_assembly
1763	2DWN	2dwn-assembly1.cif	{'ent_2': 1, 'ent_1': 2}	trimeric	3	PISA,PQS	author_and_software_defined_assembly
1764	2DWN	2dwn-assembly2.cif	{'ent_2': 1, 'ent_1': 2}	trimeric	3	PISA,PQS	author_and_software_defined_assembly
1765	2DWN	2dwn-assembly3.cif	{'ent_2': 2, 'ent_1': 4}	hexameric	6	PISA	software_defined_assembly
1766	2DWN	2dwn-assembly4.cif	{'ent_2': 2, 'ent_1': 4}	hexameric	6	PISA	software_defined_assembly
1767	5Q02	5q02-assembly1.cif	{'ent_1': 4}	tetrameric	4	PISA	author_and_software_defined_assembly
1768	5Q03	5q03-assembly1.cif	{'ent_1': 4}	tetrameric	4	PISA	author_and_software_defined_assembly
1769	5Q03	5q03-assembly2.cif	{'ent_1': 4}	tetrameric	4	PISA	author_and_software_defined_assembly
1770	1VJ1	1vj1-assembly1.cif	{'ent_1': 1}	monomeric	1	?	author_defined_assembly
1771	1VJ0	1vj0-assembly1.cif	{'ent_1': 4}	tetrameric	4	PISA	author_and_software_defined_assembly
1772	1VJ7	1vj7-assembly1.cif	{'ent_1': 1}	monomeric	1	?	author_defined_assembly
1773	1VJ7	1vj7-assembly2.cif	{'ent_1': 1}	monomeric	1	?	author_defined_assembly
1774	5Q07	5q07-assembly1.cif	{'ent_1': 4}	tetrameric	4	PISA	author_and_software_defined_assembly
1775	5Q07	5q07-assembly2.cif	{'ent_1': 4}	tetrameric	4	PISA	author_and_software_defined_assembly
1776	5Q04	5q04-assembly1.cif	{'ent_1': 4}	tetrameric	4	PISA	author_and_software_defined_assembly
1777	5Q04	5q04-assembly2.cif	{'ent_1': 4}	tetrameric	4	PISA	author_and_software_defined_assembly
1778	3I32	3i32-assembly1.cif	{'ent_1': 2}	dimeric	2	PISA	author_and_software_defined_assembly
1779	4KFG	4kfg-assembly1.cif	{'ent_1': 2}	dimeric	2	PISA	author_and_software_defined_assembly
1780	8H8A	8h8a-assembly1.cif	{'ent_2': 1, 'ent_1': 1}	dimeric	2	?	author_defined_assembly
1781	4KFC	4kfc-assembly1.cif	{'ent_3': 1, 'ent_2': 1, 'ent_1': 2}	tetrameric	4	PISA	author_and_software_defined_assembly
1782	8H8C	8h8c-assembly1.cif	{'ent_2': 2, 'ent_1': 2}	tetrameric	4	?	author_defined_assembly
1783	4P3X	4p3x-assembly1.cif	{'ent_1': 1}	monomeric	1	PISA	author_and_software_defined_assembly
1784	2DWU	2dwu-assembly1.cif	{'ent_1': 2}	dimeric	2	PISA	author_and_software_defined_assembly
1785	2DWU	2dwu-assembly2.cif	{'ent_1': 2}	dimeric	2	?	author_defined_assembly
1786	7T8N	7t8n-assembly1.cif	{'ent_1': 4}	tetrameric	4	PISA	author_and_software_defined_assembly
1787	5D0Q	5d0q-assembly1.cif	{'ent_3': 1, 'ent_2': 1, 'ent_1': 1, 'ent_4': 1}	tetrameric	4	PISA	author_and_software_defined_assembly
1788	5D0Q	5d0q-assembly2.cif	{'ent_3': 1, 'ent_2': 1, 'ent_1': 1, 'ent_4': 1}	tetrameric	4	PISA	author_and_software_defined_assembly
1789	6D0P	6d0p-assembly1.cif	{'ent_1': 1}	monomeric	1	?	author_defined_assembly
1790	6D0P	6d0p-assembly2.cif	{'ent_1': 1}	monomeric	1	?	author_defined_assembly
1791	6D0P	6d0p-assembly3.cif	{'ent_1': 1}	monomeric	1	?	author_defined_assembly
1792	6D0P	6d0p-assembly4.cif	{'ent_1': 1}	monomeric	1	?	author_defined_assembly
1793	5D0O	5d0o-assembly1.cif	{'ent_3': 1, 'ent_2': 1, 'ent_1': 1, 'ent_5': 1, 'ent_4': 1}	pentameric	5	PISA	author_and_software_defined_assembly
1794	4KF1	4kf1-assembly1.cif	{'ent_1': 2}	dimeric	2	PISA	author_and_software_defined_assembly
1795	4KF1	4kf1-assembly2.cif	{'ent_1': 2}	dimeric	2	PISA	author_and_software_defined_assembly
1796	7QI8	7qi8-assembly1.cif	{'ent_1': 2}	dimeric	2	PISA	author_and_software_defined_assembly
1797	4M4W	4m4w-assembly1.cif	{'ent_3': 6, 'ent_2': 3, 'ent_1': 6}	pentadecameric	15	?	author_defined_assembly
1798	7QI3	7qi3-assembly1.cif	{'ent_1': 2}	dimeric	2	PISA	author_and_software_defined_assembly
1799	7QI3	7qi3-assembly2.cif	{'ent_1': 2}	dimeric	2	PISA	author_and_software_defined_assembly
1800	6T17	6t17-assembly1.cif	{'ent_1': 4}	44-meric	44	PISA	author_and_software_defined_assembly
1801	4M4G	4m4g-assembly1.cif	{'ent_1': 2}	dimeric	2	PISA	author_and_software_defined_assembly
1802	4H9Z	4h9z-assembly1.cif	{'ent_1': 2}	dimeric	2	PISA	author_and_software_defined_assembly
1803	4H9Y	4h9y-assembly1.cif	{'ent_1': 2}	dimeric	2	PISA	author_and_software_defined_assembly
1804	4H9X	4h9x-assembly1.cif	{'ent_1': 2}	dimeric	2	PISA	author_and_software_defined_assembly
1805	4H9V	4h9v-assembly1.cif	{'ent_1': 2}	dimeric	2	PISA	author_and_software_defined_assembly
1806	4H9U	4h9u-assembly1.cif	{'ent_1': 2}	dimeric	2	PISA	author_and_software_defined_assembly
1807	4H9T	4h9t-assembly1.cif	{'ent_1': 2}	dimeric	2	PISA	author_and_software_defined_assembly
1808	6T1Z	6t1z-assembly1.cif	{'ent_1': 1}	monomeric	1	PISA	author_and_software_defined_assembly
1809	6T1U	6t1u-assembly1.cif	{'ent_1': 1}	monomeric	1	?	author_defined_assembly
1810	6T1U	6t1u-assembly2.cif	{'ent_1': 1}	monomeric	1	?	author_defined_assembly
1811	6T1T	6t1t-assembly1.cif	{'ent_1': 1}	monomeric	1	?	author_defined_assembly
1812	6T1T	6t1t-assembly2.cif	{'ent_1': 1}	monomeric	1	?	author_defined_assembly
1813	6T1W	6t1w-assembly1.cif	{'ent_2': 1, 'ent_1': 1}	dimeric	2	?	author_defined_assembly
1814	6T1W	6t1w-assembly2.cif	{'ent_2': 1, 'ent_1': 1}	dimeric	2	?	author_defined_assembly
1815	7QIU	7qiu-assembly1.cif	{'ent_1': 2}	dimeric	2	PISA	author_and_software_defined_assembly
1816	7QIJ	7qij-assembly1.cif	{'ent_3': 9, 'ent_2': 9, 'ent_1': 9}	27-meric	27	?	author_defined_assembly
1817	7QIJ	7qij-assembly2.cif	{'ent_3': 9, 'ent_2': 9, 'ent_1': 9}	27-meric	27	?	author_defined_assembly
1818	7QIC	7qic-assembly1.cif	{'ent_3': 1, 'ent_2': 1, 'ent_1': 1}	trimeric	3	?	author_defined_assembly
1819	7QIA	7qia-assembly1.cif	{'ent_3': 1, 'ent_2': 1, 'ent_1': 1}	trimeric	3	?	author_defined_assembly
1820	6T1B	6t1b-assembly1.cif	{'ent_1': 1}	monomeric	1	PISA	author_and_software_defined_assembly
1821	7DQR	7dqr-assembly1.cif	{'ent_1': 1}	monomeric	1	PISA	author_and_software_defined_assembly
1822	7DQS	7dqs-assembly1.cif	{'ent_1': 2}	dimeric	2	?	author_defined_assembly
1823	7KSM	7ksm-assembly1.cif	{'ent_2': 1, 'ent_1': 6}	heptameric	7	?	author_defined_assembly
1824	7DQQ	7dqq-assembly1.cif	{'ent_1': 1}	monomeric	1	PISA	author_and_software_defined_assembly
1825	7DQW	7dqw-assembly1.cif	{'ent_1': 2}	dimeric	2	?	author_defined_assembly
1826	7DQT	7dqt-assembly1.cif	{'ent_1': 1}	monomeric	1	PISA	author_and_software_defined_assembly
1827	7DQU	7dqu-assembly1.cif	{'ent_1': 2}	dimeric	2	?	author_defined_assembly
1828	7DQX	7dqx-assembly1.cif	{'ent_3': 2, 'ent_2': 1, 'ent_1': 2, 'ent_4': 1}	hexameric	6	?	author_defined_assembly
1829	6MPD	6mpd-assembly1.cif	{'ent_2': 2, 'ent_1': 2}	tetrameric	4	PISA	author_and_software_defined_assembly
1830	7MKQ	7mkq-assembly1.cif	{'ent_3': 1, 'ent_2': 1, 'ent_1': 2, 'ent_5': 1, 'ent_4': 1}	hexameric	6	?	author_defined_assembly
1831	7MKP	7mkp-assembly1.cif	{'ent_3': 1, 'ent_2': 1, 'ent_1': 2, 'ent_4': 1}	pentameric	5	?	author_defined_assembly
1832	7DQB	7dqb-assembly1.cif	{'ent_1': 2}	dimeric	2	PISA	author_and_software_defined_assembly
1833	7MKO	7mko-assembly1.cif	{'ent_3': 1, 'ent_2': 1, 'ent_1': 2, 'ent_7': 1, 'ent_6': 1, 'ent_5': 1, 'ent_4': 1}	octameric	8	?	author_defined_assembly
1834	7MKN	7mkn-assembly1.cif	{'ent_8': 1, 'ent_3': 1, 'ent_2': 1, 'ent_1': 2, 'ent_7': 1, 'ent_6': 1, 'ent_5': 1, 'ent_4': 1}	nonameric	9	?	author_defined_assembly
1835	7MKI	7mki-assembly1.cif	{'ent_3': 1, 'ent_2': 2, 'ent_1': 1, 'ent_7': 1, 'ent_6': 1, 'ent_5': 1, 'ent_4': 1}	octameric	8	?	author_defined_assembly
1836	7DQG	7dqg-assembly1.cif	{'ent_1': 2}	dimeric	2	PISA	author_and_software_defined_assembly
1837	7MKJ	7mkj-assembly1.cif	{'ent_3': 1, 'ent_2': 1, 'ent_1': 3, 'ent_7': 1, 'ent_6': 1, 'ent_5': 1, 'ent_4': 1}	nonameric	9	?	author_defined_assembly
1838	7MKE	7mke-assembly1.cif	{'ent_3': 1, 'ent_2': 1, 'ent_1': 2, 'ent_7': 1, 'ent_6': 1, 'ent_5': 1, 'ent_4': 1}	octameric	8	?	author_defined_assembly
1839	7MKD	7mkd-assembly1.cif	{'ent_3': 1, 'ent_2': 1, 'ent_1': 3, 'ent_7': 1, 'ent_6': 1, 'ent_5': 1, 'ent_4': 1}	nonameric	9	?	author_defined_assembly
1840	7DQH	7dqh-assembly1.cif	{'ent_1': 2}	dimeric	2	?	author_defined_assembly
1841	7DQI	7dqi-assembly1.cif	{'ent_1': 2}	dimeric	2	?	author_defined_assembly
1842	5I6D	5i6d-assembly1.cif	{'ent_1': 2}	dimeric	2	PISA	author_and_software_defined_assembly
1843	5I6D	5i6d-assembly2.cif	{'ent_1': 2}	dimeric	2	PISA	author_and_software_defined_assembly
1844	7DQL	7dql-assembly1.cif	{'ent_1': 2}	dimeric	2	?	author_defined_assembly
1845	7DQM	7dqm-assembly1.cif	{'ent_1': 2}	dimeric	2	?	author_defined_assembly
1846	5F92	5f92-assembly1.cif	{'ent_1': 4}	tetrameric	4	PISA	author_and_software_defined_assembly
1847	2VMB	2vmb-assembly1.cif	{'ent_1': 1}	monomeric	1	PQS	author_and_software_defined_assembly
1848	2VMB	2vmb-assembly2.cif	{'ent_1': 1}	monomeric	1	PQS	author_and_software_defined_assembly
1849	2VMA	2vma-assembly1.cif	{'ent_1': 1}	monomeric	1	PQS	author_and_software_defined_assembly
1850	2VMA	2vma-assembly2.cif	{'ent_1': 1}	monomeric	1	PQS	author_and_software_defined_assembly
1851	5F91	5f91-assembly1.cif	{'ent_1': 4}	tetrameric	4	PISA	author_and_software_defined_assembly
1852	2VMK	2vmk-assembly1.cif	{'ent_1': 4}	tetrameric	4	PQS	author_and_software_defined_assembly
1853	2FB9	2fb9-assembly1.cif	{'ent_1': 2}	dimeric	2	PISA,PQS	author_and_software_defined_assembly
1854	2VMO	2vmo-assembly1.cif	{'ent_1': 2}	dimeric	2	PISA	author_and_software_defined_assembly
1855	2VMN	2vmn-assembly1.cif	{'ent_1': 2}	dimeric	2	PISA	author_and_software_defined_assembly
1856	2VMS	2vms-assembly1.cif	{'ent_1': 2}	dimeric	2	PISA	author_and_software_defined_assembly
1857	2VMR	2vmr-assembly1.cif	{'ent_1': 2}	dimeric	2	PISA	author_and_software_defined_assembly
1858	2VMQ	2vmq-assembly1.cif	{'ent_1': 2}	dimeric	2	PISA	author_and_software_defined_assembly
1859	2VMP	2vmp-assembly1.cif	{'ent_1': 2}	dimeric	2	PISA	author_and_software_defined_assembly
1860	2VMU	2vmu-assembly1.cif	{'ent_1': 2}	dimeric	2	PISA	author_and_software_defined_assembly
1861	2VMT	2vmt-assembly1.cif	{'ent_1': 2}	dimeric	2	PISA	author_and_software_defined_assembly
1862	2FBW	2fbw-assembly1.cif	{'ent_3': 1, 'ent_2': 1, 'ent_1': 1, 'ent_4': 1}	tetrameric	4	?	author_defined_assembly
1863	2FBW	2fbw-assembly2.cif	{'ent_3': 1, 'ent_2': 1, 'ent_1': 1, 'ent_4': 1}	tetrameric	4	?	author_defined_assembly
1864	5F9Z	5f9z-assembly1.cif	{'ent_1': 1}	monomeric	1	?	author_defined_assembly
1865	5F9Z	5f9z-assembly2.cif	{'ent_1': 1}	monomeric	1	?	author_defined_assembly
1866	5F9Z	5f9z-assembly3.cif	{'ent_1': 2}	dimeric	2	PISA	software_defined_assembly
1867	5F9Y	5f9y-assembly1.cif	{'ent_1': 1}	monomeric	1	?	author_defined_assembly
1868	5F9Y	5f9y-assembly2.cif	{'ent_1': 1}	monomeric	1	?	author_defined_assembly
1869	5F9Y	5f9y-assembly3.cif	{'ent_1': 2}	dimeric	2	PISA	software_defined_assembly
1870	5F9C	5f9c-assembly1.cif	{'ent_1': 1}	monomeric	1	?	author_defined_assembly
1871	5F9C	5f9c-assembly2.cif	{'ent_1': 1}	monomeric	1	?	author_defined_assembly
1872	2FBK	2fbk-assembly1.cif	{'ent_1': 2}	dimeric	2	PISA	author_and_software_defined_assembly
1873	2FBH	2fbh-assembly1.cif	{'ent_1': 2}	dimeric	2	PISA,PQS	author_and_software_defined_assembly
1874	2FBH	2fbh-assembly2.cif	{'ent_1': 2}	dimeric	2	PISA	software_defined_assembly
1875	2VM8	2vm8-assembly1.cif	{'ent_1': 4}	tetrameric	4	PQS	software_defined_assembly
1876	2KNQ	2knq-assembly1.cif	{'ent_1': 1}	monomeric	1	?	author_defined_assembly
1877	5F9M	5f9m-assembly1.cif	{'ent_1': 2}	dimeric	2	PISA	author_and_software_defined_assembly
1878	5F9M	5f9m-assembly2.cif	{'ent_1': 2}	dimeric	2	PISA	author_and_software_defined_assembly
1879	5I68	5i68-assembly1.cif	{'ent_1': 8}	octameric	8	UCSF CHIMERA 1.10.2_b40686.	software_defined_assembly
1880	5I69	5i69-assembly1.cif	{'ent_1': 1}	monomeric	1	PISA	author_and_software_defined_assembly
1881	7MK5	7mk5-assembly1.cif	{'ent_1': 14}	tetradecameric	14	PISA	author_and_software_defined_assembly
1882	7MK5	7mk5-assembly2.cif	{'ent_1': 14}	tetradecameric	14	PISA	author_and_software_defined_assembly
1883	7MK7	7mk7-assembly1.cif	{'ent_1': 1}	monomeric	1	?	author_defined_assembly
1884	7MK7	7mk7-assembly2.cif	{'ent_1': 1}	monomeric	1	?	author_defined_assembly
1885	7DQ9	7dq9-assembly1.cif	{'ent_1': 1}	monomeric	1	?	author_defined_assembly
1886	7DQ9	7dq9-assembly2.cif	{'ent_1': 1}	monomeric	1	?	author_defined_assembly
1887	7DQ9	7dq9-assembly3.cif	{'ent_1': 1}	monomeric	1	?	author_defined_assembly
1888	7DQ9	7dq9-assembly4.cif	{'ent_1': 1}	monomeric	1	?	author_defined_assembly
1889	3HNZ	3hnz-assembly1.cif	{'ent_1': 2}	dimeric	2	PISA	author_and_software_defined_assembly
1890	7PE0	7pe0-assembly1.cif	{'ent_1': 2}	dimeric	2	PISA	author_and_software_defined_assembly
1891	6OEB	6oeb-assembly1.cif	{'ent_3': 2, 'ent_2': 2, 'ent_1': 1}	pentameric	5	?	author_defined_assembly
1892	7JSZ	7jsz-assembly1.cif	{'ent_49': 1, 'ent_9': 1, 'ent_8': 1, 'ent_3': 1, 'ent_2': 1, 'ent_1': 1, 'ent_7': 1, 'ent_6': 1, 'ent_5': 1, 'ent_4': 1, 'ent_31': 1, 'ent_30': 1, 'ent_19': 1, 'ent_32': 1, 'ent_35': 1, 'ent_34': 1, 'ent_37': 1, 'ent_36': 1, 'ent_13': 1, 'ent_12': 1, 'ent_11': 1, 'ent_10': 1, 'ent_17': 1, 'ent_16': 1, 'ent_15': 1, 'ent_14': 1, 'ent_57': 1, 'ent_56': 1, 'ent_33': 1, 'ent_51': 1, 'ent_18': 1, 'ent…	57-meric	57	?	author_defined_assembly
1893	3FUT	3fut-assembly1.cif	{'ent_1': 1}	monomeric	1	PISA	author_and_software_defined_assembly
1894	3FUT	3fut-assembly2.cif	{'ent_1': 1}	monomeric	1	PISA	author_and_software_defined_assembly
1895	7JSW	7jsw-assembly1.cif	{'ent_49': 1, 'ent_9': 1, 'ent_8': 1, 'ent_3': 1, 'ent_2': 1, 'ent_1': 1, 'ent_7': 1, 'ent_6': 1, 'ent_5': 1, 'ent_4': 1, 'ent_31': 1, 'ent_30': 1, 'ent_19': 1, 'ent_32': 1, 'ent_35': 1, 'ent_34': 1, 'ent_37': 1, 'ent_36': 1, 'ent_13': 1, 'ent_12': 1, 'ent_11': 1, 'ent_10': 1, 'ent_17': 1, 'ent_16': 1, 'ent_15': 1, 'ent_14': 1, 'ent_33': 1, 'ent_51': 1, 'ent_18': 1, 'ent_53': 1, 'ent_52': 1, 'ent…	54-meric	54	?	author_defined_assembly
1896	3FUV	3fuv-assembly1.cif	{'ent_1': 1}	monomeric	1	PISA	author_and_software_defined_assembly
1897	3FUV	3fuv-assembly2.cif	{'ent_1': 1}	monomeric	1	PISA	author_and_software_defined_assembly
1898	3FUV	3fuv-assembly3.cif	{'ent_1': 1}	monomeric	1	PISA	author_and_software_defined_assembly
1899	3FUW	3fuw-assembly1.cif	{'ent_1': 1}	monomeric	1	PISA	author_and_software_defined_assembly
1900	7JSS	7jss-assembly1.cif	{'ent_49': 1, 'ent_9': 1, 'ent_8': 1, 'ent_3': 1, 'ent_2': 1, 'ent_1': 1, 'ent_7': 1, 'ent_6': 1, 'ent_5': 1, 'ent_4': 1, 'ent_31': 1, 'ent_30': 1, 'ent_19': 1, 'ent_32': 1, 'ent_35': 1, 'ent_34': 1, 'ent_37': 1, 'ent_36': 1, 'ent_13': 1, 'ent_12': 1, 'ent_11': 1, 'ent_10': 1, 'ent_17': 1, 'ent_16': 1, 'ent_15': 1, 'ent_14': 1, 'ent_33': 1, 'ent_51': 1, 'ent_18': 1, 'ent_53': 1, 'ent_52': 1, 'ent…	54-meric	54	?	author_defined_assembly
1901	7JSO	7jso-assembly1.cif	{'ent_1': 4}	tetrameric	4	PISA	author_and_software_defined_assembly
1902	7JSO	7jso-assembly2.cif	{'ent_1': 4}	tetrameric	4	PISA	author_and_software_defined_assembly
1903	7JSO	7jso-assembly3.cif	{'ent_1': 4}	tetrameric	4	PISA	software_defined_assembly
1904	3FUA	3fua-assembly1.cif	{'ent_1': 4}	tetrameric	4	PISA,PQS	author_and_software_defined_assembly
1905	3FUA	3fua-assembly2.cif	{'ent_1': 24}	24-meric	24	PISA	software_defined_assembly
1906	3FUC	3fuc-assembly1.cif	{'ent_1': 3}	trimeric	3	PISA	author_and_software_defined_assembly
1907	2AX3	2ax3-assembly1.cif	{'ent_2': 8, 'ent_1': 8}	hexadecameric	16	PISA	author_and_software_defined_assembly
1908	2AX3	2ax3-assembly2.cif	{'ent_2': 1, 'ent_1': 1}	dimeric	2	PQS	software_defined_assembly
1909	1T6K	1t6k-assembly1.cif	{'ent_1': 2}	dimeric	2	?	author_defined_assembly
1910	2AX4	2ax4-assembly1.cif	{'ent_1': 2}	dimeric	2	PISA	author_and_software_defined_assembly
1911	2AX4	2ax4-assembly2.cif	{'ent_1': 2}	dimeric	2	PISA	author_and_software_defined_assembly
1912	1T6D	1t6d-assembly1.cif	{'ent_1': 1}	monomeric	1	?	author_defined_assembly
1913	1T6D	1t6d-assembly2.cif	{'ent_1': 1}	monomeric	1	?	author_defined_assembly
1914	3KWM	3kwm-assembly1.cif	{'ent_1': 2}	dimeric	2	PISA	author_and_software_defined_assembly
1915	3KWM	3kwm-assembly2.cif	{'ent_1': 2}	dimeric	2	PISA	author_and_software_defined_assembly
1916	5OHG	5ohg-assembly1.cif	{'ent_3': 2, 'ent_2': 1, 'ent_1': 2}	trimeric	3	PISA	author_and_software_defined_assembly
1917	5OHG	5ohg-assembly2.cif	{'ent_3': 2, 'ent_2': 1, 'ent_1': 2}	trimeric	3	PISA	author_and_software_defined_assembly
1918	3KWK	3kwk-assembly1.cif	{'ent_1': 2}	dimeric	2	PISA	author_and_software_defined_assembly
1919	1T6C	1t6c-assembly1.cif	{'ent_1': 1}	monomeric	1	?	author_defined_assembly
1920	3KWS	3kws-assembly1.cif	{'ent_1': 2}	dimeric	2	PISA	author_and_software_defined_assembly
1921	1T6X	1t6x-assembly1.cif	{'ent_1': 2}	dimeric	2	?	author_defined_assembly
1922	1T6Z	1t6z-assembly1.cif	{'ent_1': 2}	dimeric	2	?	author_defined_assembly
1923	5OHT	5oht-assembly1.cif	{'ent_1': 1}	monomeric	1	PISA	software_defined_assembly
1924	5OHT	5oht-assembly2.cif	{'ent_1': 1}	monomeric	1	PISA	software_defined_assembly
1925	5OHU	5ohu-assembly1.cif	{'ent_1': 1}	monomeric	1	PISA	author_and_software_defined_assembly
1926	5OHS	5ohs-assembly1.cif	{'ent_1': 1}	monomeric	1	PISA	author_and_software_defined_assembly
1927	5OHS	5ohs-assembly2.cif	{'ent_1': 1}	monomeric	1	PISA	author_and_software_defined_assembly
1928	5OHS	5ohs-assembly3.cif	{'ent_1': 1}	monomeric	1	PISA	author_and_software_defined_assembly
1929	5OHS	5ohs-assembly4.cif	{'ent_1': 1}	monomeric	1	PISA	author_and_software_defined_assembly
1930	5OHS	5ohs-assembly5.cif	{'ent_1': 1}	monomeric	1	PISA	author_and_software_defined_assembly
1931	5OHS	5ohs-assembly6.cif	{'ent_1': 1}	monomeric	1	PISA	author_and_software_defined_assembly
1932	5OHS	5ohs-assembly7.cif	{'ent_1': 1}	monomeric	1	PISA	author_and_software_defined_assembly
1933	5OHS	5ohs-assembly8.cif	{'ent_1': 1}	monomeric	1	PISA	author_and_software_defined_assembly
1934	3KW2	3kw2-assembly1.cif	{'ent_1': 2}	dimeric	2	PISA	software_defined_assembly
1935	2AXD	2axd-assembly1.cif	{'ent_1': 1}	monomeric	1	?	author_defined_assembly
1936	5OH0	5oh0-assembly1.cif	{'ent_1': 6}	hexameric	6	PISA	author_and_software_defined_assembly
1937	2AXN	2axn-assembly1.cif	{'ent_1': 1}	monomeric	1	?	author_defined_assembly
1938	3FU1	3fu1-assembly1.cif	{'ent_1': 2}	dimeric	2	PISA	software_defined_assembly
1939	6SUT	6sut-assembly1.cif	{'ent_1': 1}	monomeric	1	?	author_defined_assembly
1940	8GPW	8gpw-assembly1.cif	{'ent_1': 2}	dimeric	2	?	author_defined_assembly
1941	6SUP	6sup-assembly1.cif	{'ent_1': 1}	monomeric	1	PISA	author_and_software_defined_assembly
1942	6SUQ	6suq-assembly1.cif	{'ent_1': 1}	monomeric	1	PISA	author_and_software_defined_assembly
1943	5XA2	5xa2-assembly1.cif	{'ent_1': 2}	dimeric	2	PISA	author_and_software_defined_assembly
1944	6SUF	6suf-assembly1.cif	{'ent_2': 1, 'ent_1': 5}	hexameric	6	PISA	author_and_software_defined_assembly
1945	6SUE	6sue-assembly1.cif	{'ent_2': 1, 'ent_1': 5}	hexameric	6	PISA	author_and_software_defined_assembly
1946	6SUL	6sul-assembly1.cif	{'ent_1': 2}	dimeric	2	PISA	author_and_software_defined_assembly
1947	6SUL	6sul-assembly2.cif	{'ent_1': 2}	dimeric	2	PISA	author_and_software_defined_assembly
1948	6SUI	6sui-assembly1.cif	{'ent_1': 1}	monomeric	1	PISA	author_and_software_defined_assembly
1949	3UAI	3uai-assembly1.cif	{'ent_3': 1, 'ent_2': 1, 'ent_1': 1, 'ent_4': 1}	tetrameric	4	PISA	author_and_software_defined_assembly
1950	3UAO	3uao-assembly1.cif	{'ent_1': 4}	tetrameric	4	PISA	author_and_software_defined_assembly
1951	3UAO	3uao-assembly2.cif	{'ent_1': 4}	tetrameric	4	PISA	author_and_software_defined_assembly
1952	5MQ7	5mq7-assembly1.cif	{'ent_1': 3}	360-meric	1	PISA	software_defined_assembly
1953	3UAC	3uac-assembly1.cif	{'ent_1': 1}	monomeric	1	PISA	author_and_software_defined_assembly
1954	3UAB	3uab-assembly1.cif	{'ent_1': 1}	monomeric	1	PISA	author_and_software_defined_assembly
1955	3UAA	3uaa-assembly1.cif	{'ent_1': 1}	monomeric	1	PISA	author_and_software_defined_assembly
1956	3UAG	3uag-assembly1.cif	{'ent_1': 1}	monomeric	1	?	author_defined_assembly
1957	3UAE	3uae-assembly1.cif	{'ent_1': 1}	monomeric	1	PISA	author_and_software_defined_assembly
1958	3UAD	3uad-assembly1.cif	{'ent_1': 1}	monomeric	1	PISA	author_and_software_defined_assembly
1959	3UAR	3uar-assembly1.cif	{'ent_1': 2}	dimeric	2	PISA	author_and_software_defined_assembly
1960	5NNH	5nnh-assembly1.cif	{'ent_1': 1}	monomeric	1	PISA	author_and_software_defined_assembly
1961	3UAV	3uav-assembly1.cif	{'ent_1': 6}	hexameric	6	PISA	author_and_software_defined_assembly
1962	4P34	4p34-assembly1.cif	{'ent_1': 2}	dimeric	2	PISA	author_and_software_defined_assembly
1963	5NN7	5nn7-assembly1.cif	{'ent_1': 1}	monomeric	1	PISA	author_and_software_defined_assembly
1964	4P36	4p36-assembly1.cif	{'ent_1': 2}	dimeric	2	PISA	author_and_software_defined_assembly
1965	5XAY	5xay-assembly1.cif	{'ent_1': 2}	dimeric	2	PISA	author_and_software_defined_assembly
1966	5XAY	5xay-assembly2.cif	{'ent_1': 2}	dimeric	2	PISA	author_and_software_defined_assembly
1967	5XAY	5xay-assembly3.cif	{'ent_1': 2}	dimeric	2	PISA	author_and_software_defined_assembly
1968	5XAY	5xay-assembly4.cif	{'ent_1': 2}	dimeric	2	PISA	author_and_software_defined_assembly
1969	5XAZ	5xaz-assembly1.cif	{'ent_1': 2}	dimeric	2	PISA	author_and_software_defined_assembly
1970	5XAZ	5xaz-assembly2.cif	{'ent_1': 2}	dimeric	2	PISA	author_and_software_defined_assembly
1971	5XAZ	5xaz-assembly3.cif	{'ent_1': 2}	dimeric	2	PISA	author_and_software_defined_assembly
1972	5XAZ	5xaz-assembly4.cif	{'ent_1': 2}	dimeric	2	PISA	author_and_software_defined_assembly
1973	6SU2	6su2-assembly1.cif	{'ent_1': 4}	tetrameric	4	PISA	software_defined_assembly
1974	6SU2	6su2-assembly2.cif	{'ent_1': 4}	tetrameric	4	PISA	software_defined_assembly
1975	6SU1	6su1-assembly1.cif	{'ent_1': 4}	tetrameric	4	PISA	author_and_software_defined_assembly
1976	6SU1	6su1-assembly2.cif	{'ent_1': 4}	tetrameric	4	PISA	author_and_software_defined_assembly
1977	5XAP	5xap-assembly1.cif	{'ent_1': 1}	monomeric	1	?	author_defined_assembly
1978	6SU9	6su9-assembly1.cif	{'ent_1': 2}	dimeric	2	PISA	author_and_software_defined_assembly
1979	5XAI	5xai-assembly1.cif	{'ent_1': 2}	dimeric	2	PISA	author_and_software_defined_assembly
1980	5XAK	5xak-assembly1.cif	{'ent_1': 2}	dimeric	2	PISA	author_and_software_defined_assembly
1981	5XAL	5xal-assembly1.cif	{'ent_1': 2}	dimeric	2	PISA	author_and_software_defined_assembly
1982	5XAM	5xam-assembly1.cif	{'ent_1': 1}	monomeric	1	PISA	author_and_software_defined_assembly
1983	5XAM	5xam-assembly2.cif	{'ent_1': 1}	monomeric	1	PISA	author_and_software_defined_assembly
1984	5XAN	5xan-assembly1.cif	{'ent_1': 1}	monomeric	1	?	author_defined_assembly
1985	5XAN	5xan-assembly2.cif	{'ent_1': 1}	monomeric	1	?	author_defined_assembly
1986	5XAO	5xao-assembly1.cif	{'ent_1': 1}	monomeric	1	PISA	author_and_software_defined_assembly
1987	5XAO	5xao-assembly2.cif	{'ent_1': 1}	monomeric	1	PISA	author_and_software_defined_assembly
1988	6LZK	6lzk-assembly1.cif	{'ent_1': 1}	monomeric	1	PISA	author_and_software_defined_assembly
1989	6LZK	6lzk-assembly2.cif	{'ent_1': 1}	monomeric	1	PISA	author_and_software_defined_assembly
1990	6LZK	6lzk-assembly3.cif	{'ent_1': 1}	monomeric	1	PISA	author_and_software_defined_assembly
1991	6IKZ	6ikz-assembly1.cif	{'ent_1': 4}	tetrameric	4	PISA	author_and_software_defined_assembly
1992	6IKX	6ikx-assembly1.cif	{'ent_1': 4}	tetrameric	4	PISA	author_and_software_defined_assembly
1993	3ZHC	3zhc-assembly1.cif	{'ent_1': 2}	dimeric	2	PISA	author_and_software_defined_assembly
1994	3ZHB	3zhb-assembly1.cif	{'ent_1': 2}	dimeric	2	PISA	author_and_software_defined_assembly
1995	3ZHB	3zhb-assembly2.cif	{'ent_1': 2}	dimeric	2	PISA	author_and_software_defined_assembly
1996	3ZHO	3zho-assembly1.cif	{'ent_1': 4}	tetrameric	4	PISA	author_and_software_defined_assembly
1997	6IKJ	6ikj-assembly1.cif	{'ent_1': 2}	dimeric	2	?	author_defined_assembly
1998	6IKK	6ikk-assembly1.cif	{'ent_2': 1, 'ent_1': 1}	dimeric	2	PISA	author_and_software_defined_assembly
[truncated: 78,362 more rows]
